# Supplementary material
Source: HighWire-hosted journal article supplement (doi:10.1101/rna.079103.122)
Supplement: Supplemental_Table_S8.xlsx [file Supplemental_Table_S8.xlsx]

## Sheet: Title
Supplementary Table S8. Ribosomal protein sequence alignments (FASTA format) used to generate Supplementary Figure S4.

## Sheet: bS1
>CPR_others_Dojkabacteria_GCA_000991805.1
-----------------------MA------------------------IT------------------------SPKENPM------AQT-Q------------------KS-A-YA----QI----------D-QFLIDEGNKI--RKLSKGDIVEGVVADVRDGYVVVDV-GYKSEGIVAGRELKSE--TMNWRDLKVGDSLLVYVVKPEDDEGQLVLSIRRTQQASAWITLEKSKKDNSVVETTVVEANNGGLIVEIKDIRGFIPTSQLDASRYLNGVRDISSRVQKTLNSLVGEKVQTRIIELDREKNRIILSEKMVTQSRDLEQREKTLNKVKESDVLVGTVSGITPFGIFVNA------------EGLEGLVHLSELSWDKVENIDSIYSVG…
>CPR_others_Dojkabacteria_GCA_001771775.1
---------------------MILVYVCNTADSY---------------YIME-----K----------------KTKVVDT------DIK-D------------------KA-L-YS----EL----------E-SFLSDNTHII--KQLSKGDIVEGDIVDINNGVIVVDV-GYKSEGIVAGRELKSD--TLDWTTLKPGDKLLVYVVKPEDEKGQLVLSIRRTQQASAWLALENAKKNNDIVDAIVVESNNGGLIVEMKGIRGFIPTSQLDATRYSNGVRDISSRVQKRLNSLIGESIKTRIIELDREKNRIILSEKMVTQARDLEKRANTLKKVKEGDALEGTISGITPFGVFVNA------------QGLEGLVHLSELSWDKVEDIGAIYSVG…
>CPR_others_Dojkabacteria_GCA_001771745.1
---------------------MYMV--------------------------------------------------NTKVKST------DVK-D------------------KA-M-YS----EL----------D-TFLSDDSHKI--KQLSKGEIVEGEIVSINNGVIVVDV-GFKSEGIIAGKELKSE--ILDWTKLSVGDKILVYVVKPEDDKGQLVLSIRRTQQASAWLALENAKKSNEVVEATVVESNNGGLIVEIKGIRGFIPTSQLDATRYANGVRDISSRVQKRLNTLIGESIKTRIIELDREKNRIILSEKMVTQAKDLEK--------------------IYP-----------------------------KEEWWKINRYFVLYGRY…
>CPR_others_CPR3_GCA_000990575.1
------------------------------------------------------------------------------MNKK------DTV-A------------------AS-E-AR----SM----------D-DLKDNPLFNP--KPIKRNKIVEGIVLSINDNEILVDL-GTKAEGVILGKELRAE--KDFLSQLKKGDSILASVAQVENDHGQVVLSLRRAGIERRWRKLEQAFEEKTPVKVKVIDFNRGGLLVD-GGIRGFIPISQLSQNIFP----GSKEEVEDSLEKLKGKEIEAYVLEANRKANKLILSARPLDQSFSHDQKAEVLSKVKSDDVIPGTVTRIVPFGILVDI------------GGIDGLVHISEVSWDRLKKPEDLYSVG…
>CPR_others_CPR1_GCA_000998265.1
---------------------------------------------------------------------------------------------------------------------------MN----D----DVDFFDSVD-SL--PPVK-GRQYDGVIVAITVDGYFVEL--EK-HTLLPFNEAKAAYG------LQVGQPVVIFSTELDRRD--VWLSTCHPLFDKDLAFVQRAVETGDWVEVKVSGQNARGLRLVY-GIGGFMFFENVDWERHR-----------KN-QNLIGQTMVVRITSCIDYRG-FYASER--LERNDDLTGSGDLCSVQVGEIVEGTVTGLKPYGVFVNI------------DGADGLISIAEIANRFIVDVEQEFTIG…
>CPR_WWE3_WWE3_GCA_001772655.1
----------M---------------------------------------------------------------------------------------------------------SS----DM----------K-TLLEKTKVAV--HQLRPGDVVEGTVLAKEKGELVLNI-GAKSEGLVTGRDFEEE--ANAVSKLKVGDRIFATVLQSEDNRGFTLLSLRKARAAADWREAQKAYEEEKVQEVEILGPNRGGVVARFGSIRGFIPFSQLSLKT----------KMEANMGKLTGKVLRAKIIEIDQERDRLVFSERDAFTKGERAEELAALAKVKIGETYDGEVTMVTPFAAFVSF------------DSLEGMIHVSELSWEKVAEATRVVAPG…
>CPR_WWE3_WWE3_GCA_001772955.1
----------M-------------------------------------------------------------------------------------------------------N-MS----DM----------G-TLLEKAVAKV--HQLKPGDVVEGIVLSKGKDEIILNI-GAKAEGLVTGLELEDE--AETAAKLKPGDKVLATVIQSEDNRGFILLSLKKAEIERDWREAAKSYEEEKVLEVEILGPNRGGVVARMGSLRGFIPFSHLALAN----------KMLANSGKLAGKVVKAKIIELNREIDRLVLSEREALSKGERAQEQAALGKIKVGEKYEGEITSVTPFAVFVKF------------GDFEGMVHVSELSWEKTADATKVVKAG…
>CPR_WWE3_WWE3_GCA_001772715.1
----------MLA------------------------------------VTEKVSKVPK----------------VSEVSKA------NKK-Q------------------SS-G-AS----TM----------E-ELLFNVGYAP--KGLSRGETVVGTVVEIAPKALILDI-GAKSEGIVSEREFEAA--KAYIKTLKPGDKIEATVVTPEGEGGYTLLSLRETGEEFVWKTLEEKQKNGEELEAKVESATRGGLTVSVLGIAGFIPSSHLGGDL------------SQNSEGAVGKNITVKVIEIDRVKGRVVASEKAVSEREFLYKQTEVLKNIKAGEKFVGRVTKVMNFGVFVEIVR--------DEIPVEGLVHVSEIAWTKTADPSELYAEG…
>CPR_WWE3_WWE3_GCA_001772715.1_2
----------------------MPVDK-----------------------------------------------------KE------KID-P------------------TS-P-GS----AM----------N-DLLSRPEWEI--RSFRYGDIVEGIVVSKSKNELLVDI-GGKSEGMVTDKELEDS--FDTFRSLKVGDPVLCFVLHAEDEQGYVVLSLRRAEAEKIWMELKRSMTDEIPMDVKVLDFNKGGLLVELGAIRGFIPVSHIDRVHFPDNSGGFRGGRDDTLSSMVGMNLQAVVIELDRRENRLIMSEKLAHAGKSRGEQREAMDKMKVGDVLTGTVTAVLPFGIFVDL------------KGIEGLVHISELSWGKVSDPQEHFEKG…
>CPR_WWE3_WWE3_GCA_001772585.1
----------M--------------------------------------------------------------DTSSKLKSS------KLN-------------------NTS-K-AT----SM----------A-DLMEKNKTPF--ISPHKGDMLTGTITKLTSGEILVDI-NAKTEAVVLEKEKNIL--NKILSSFKVGDKIKVQVLNPESDFGYPVISLRRSVGDITWDRLLVLQKSQEPVEVNLDMATKGGYLATTDGISGFLPNSHTSS--------------LASPQGLIGRKIKVVVLETNRELNKIIFSQKQVMGPA---DFQKLIKNLKIGQKIDAVVSNVVPFGVFLSIPVD-------DNELAEGFIHISETSWENVENLNDLFKIG…
>CPR_WWE3_WWE3_GCA_001873785.1
----------MGWENS-------------------------------------------------------SLPVPQSMVKK------ADK-------------------KLN-K-AR----SM----------G-ELLSESSMP---SGFSVGDTMGGVVVSVSNSEILVDV-GAKSEGIISGSELTGE--FGSYKNLKVGESVFVTVLKPEDYRGYLVLSLKRAKKEKLWLDLQELFEKGTPIEAVTMEYNKGGVLVDIKGLRGFIPISHLSKSHFADFNKVGLQDINKKIVSVLGKTLTVKVIEVSREQNRIVLSEKELESAKLEKEARKKLKKIKLGDILKGSVIAILPFGALVDC------------KGLDGLVHISEVSWEKVADLNEIFKIG…
>CPR_WWE3_WWE3_GCA_001772615.1
----------------------------------------------------------------------------------------------------------------M-N-EH----PM----------Q-KLLDKHKVEI--KSFKPGDIIEGMVVSVSYKEVLVDV-GAKSEGIISGFDLDDT--DKSYKYLKEGDPIVATVVQAENDQGYLVLSLKKAEREKKWKDMEDAFKTGAVFNVKVIEYNKGGLLVDCFGLRGFIPLSHLDKGHFAKDEGGSETELKERLSVLSGKELKVKVIEVDPEKNRLVLSEKDARPDTDQEEIRKKLDAVKEGDVLEGVVTGVMPFGAFVDV------------DGLDGLVHISEIAWEKVSHPGKYFSVG…
>CPR_WWE3_WWE3_GCA_001772625.1
MDG-HRTISKM---------------------------------------------------------------------SK------ARNIF-------------------K-Q-DS----VM----------V-KLLGDKVVEL--KSFEPGDVVEGIVVSITPKEILLDV-GAKSEGVVMSDELGDS---EAAKNLKEGDFVLAYVMQAENDQGHIVLSFKRAQRERGWRDVEMAFKDGSVLQVTVLEYNKGGLLVDCMGLRGFVPLSHLDRVHFTEDMAGSEAELKESLKILAGKKLTVKVIEIDKEKNRLVLSEKDATSTYSTEVREEKLSQVKIGDELEGVVTGVMPFGLFVDM------------EGIEGLVHISEIAWEKVSHPGNYYTVG…
>CPR_WWE3_WWE3_GCA_001000765.1
----------M--------------------------------------------------------------------YMR------AKQVN-------------------K-P-NS----SM----------A-TLV-TGNLPL--RKYSVGDIAEGYVISVTDNEILLDI-GAKSEGVIAREEFGDL--KSNLPNIKAGDMLIAQVIQSESDQGYTVLSLKRAERERKWRDIEHLYNANITSEARVLEYNKGGLLADFMGMRGFIPLSHLDRVHFTEDLTGSEAEIKESLRSLAGKVLKIRVIEFDKEKNRLVLSEKKALEHYSEEARQKRLEQVKEGDIAEGVVTGVMPFGVFVDL------------NGIEGLVHISEMAWEKVSNPSFYYTVG…
>CPR_WWE3_WWE3_GCA_001772885.1
----------M---------------------------------------------------------------------SK------ATKVH-------------------K-E-NS----KM----------Q-KLLEEKGVDV--KQFRPGDLIDGVVVSVSHGEILVDV-GAKSEGIVSGTELGTE--DKYFKTLKPGDNVIAMVVQSENDQGYMVLSLKRAEKDRKWYDAEVAFKDGSVLEATVVEYNKGGLLADCLGLRGFIPLSHLDRVHFANDIAGSESELKASLKVLSGKVLKVKIIEMDKSKNRLVLSEKDALGAYSEEARHEKLAKIKAGDVLEGIVTGIMPFGVFVDL------------DGVEGLVHISEIAWEKVNHPSNYFAVG…
>CPR_WWE3_WWE3_GCA_001773055.1
----------M---------------------------------------------------------------------PK------SRKVH-------------------K-E-SS----AM----------S-QHYKDADMGL--KDLHPGDLIEGVVVSVSHGEVLVDV-GSKSEGIISGAELVDE--DNTHKNLKPGDTLLAKVLQVENDQGYIVLSLKRAEKDRKWKDAQDALDSQASLEAIVIEYNKGGLLADCIGLRGFIPLSHLDRAHFANDIAGSEAELKESLKVLSGKTLKVKVIELDKEKNRFVLSEKDALSTYSDEARELRLDKIKDGDILEGIVTGIMPFGVFIDL------------DGVEGLVHISEIAWEKVSHPSLYFKVG…
>CPR_WWE3_WWE3_GCA_001773395.1
M---KANTRKM---------------------------------------------------------------------SK------SSKVH-------------------K-P-GS----AM----------A-KLLTEKDLQM--KDLRPGDLVEGIVVSVSHSEVLLDV-GAKSEGVVSGSDLSDA--DESFKHLNLGDTIFAKVVQAENQQGYIVLSLRKAEKDKKWKGAEDALATGSVLEATIIEYNKGGLLTECLGLRGFIPLSHLDRSHFANDIAGSEAELKESLKALAGKVIKVKVIELDPLKNRFVLSEKDALSTYSDESREKRLREIDAGTTLEGIVTGIMPFGVFIDL------------DGVEGLVHISEIAWEKVNNPSSYFSVG…
>CPR_MG_Woykebacteria_GCA_001816835.1
----------M-----------PRKTATK---------------------TTAVTNETE------------NKSTETIQKEV------DSS-------------------KKE-A-KM----SF----------A-ELLESEKYAP--KPLNRGQVVEGTVISNQRGGIMVDI-GGKSEGLIIGRELETE--DRMAKTLAPGDSVLVYVIQAENDNGNALLSLRRASNERVWRELQNSLDKKDLVEVSAIDQNRGGLLVDFKGLRGFIPTSQLDNNR------------SDQLS--LGRKIKATVLELDRKANRLVLSEKEGLGGEEKEKKQKLLTDIKVGETFEGSVTNILPFGLFIKI-----------PSGLEGLVHISEIAWERVGNPNDYYKVG…
>CPR_MG_Woykebacteria_GCA_001816655.1
MNGK----KFMKEE-------------------------------------------------------------------------------------------------DA-S-GS----KM----------Q-ELLEKNSITP--RLLTKGEKIEGKVLTRLLDSLLVDL-GAKAEGVIPLKELEDL-----ESQPKEGDKIVAIVSQTENDSGLTILTLKKGQKEKVWETLQEASDKGDVVDVKGVESNRGGLIVDYNGLRGFIPSAHL----------------TTSAREAIGKKISVKVLEANKNFNRLVFSEKEVAGE----IAPKIDLPFKIDDVLTVTISKILPFGLLVAL---------T--GGSEGLIHISEISWTRVENITENYKTG…
>CPR_MG_Woykebacteria_GCA_001816715.1
----------MAKDEAETS------------------------------------------------------------SQQSKIRFSTEKIRE-------------VFSPDT-S-GS----KM----------A-QLLAVKGFAP--RALSKGETVEGQIVSILADSALVDI-GSKAEGIIPLKELHDS-----GEKIEIGAKISAVIAQSEGDSGTAVLTVKKTIKERAWEQLQDISDKGEHVEVKGVGSNRGGLIVEYKGTRGFIPSSHL----------------VTDARNAIGKNLTVSVIQVDDKLNKLVFSEKEVVGE----VLPKVELAFKIGDSLDVSISKILPFGLLVST---------P--SGPDGLVHISEISWKKVSSLQDLYKIG…
>CPR_MG_Curtissbacteria_GCA_001776335.1
----------MA-------------------------------------------------------------QTSASKSSK------SDS-T------------------SR-G-SM----SM----------A-DLLASTNYKI--LTLKRGQEIEGKVVSATPTEILIDV-GGKSEGIITGRELSAS--RDIASKLSVGDTINVNVVYPENDAGQVVLSLRKLSGEKRWEDLVEKQKNSEEVEVVAIEANRGGVICEWSGLRGFLPASQLAKA-------------PSKLDDLVGKNLSVRVIEVDRVTNRLIFSQKMP-GKKDLGDLIKLLAKVKIGDKFSGMVTAVLPFGIFVEISPKEL-EKKDGKSKLEGLVHISEISWEKVDDPLKIFKVG…
>CPR_MG_Curtissbacteria_GCA_001774835.1
----------MVQQ-------------------------------------NSTNKPSK----------------SKSNTSN------TSK-N------------------SD-K-VT----TM----------A-ELLASTGYRI--PALRRGQEVSGKIISISPFEILIDI-GAKSEGLVYGRELAAV--GDLIEQFSVGDKVDAQVIFPENDAGQVVLSLRKLSGEKRWLELEEKREEQEDIGVVAVEVNRGGVICDFLGLRGFLPASLLSVSL------SGQAQAPAKLEQLIGKNLTVRVIEVDRSTNRLIFSQKQL-SKSDIDSLLKLLSKVEIGEKYSGQVSAVLPFGIFVEIEIGSVGHEP-TSQKLEGLVHISEISWEKVDDPSKLFKVG…
>CPR_MG_Curtissbacteria_GCA_001775055.1
----------M--------------LKSKSSKP-----------------------------------------TGSSRAKP------FGK-T------------------QG-K-PT----SM----------E-ELLASSGYQI--PSIRRGQEVSGKIVSISHSEILVDI-GAKSEGIVASREMSSI--RDIISGLSVGDTIDVTVIYPENDAGQVVLSMRKLSQDVRWQDLEDKKNSDEEIGVVALEVNRGGVICDYTGLRGFLPASLLTK-------------IPSNLADLIGKSLTARVIEVDRQGNRLIFSQKQP-DTKDLKAIGKLLAKVKIGQKLAGVVSAILPFGIFVEVNVGQEGSQPSKSSKLEGLVHISEISWEKVEDPSRLFKVG…
>CPR_MG_Curtissbacteria_GCA_001774865.1
----------MVPRRARDK---PSAKKTRRNPS----------------APLRPIRQAQ------------GRQAQGRSGSN------DQV-S------------------TK-G-HL----TM----------A-DLLESTGYKI--PALKRGQEVTGKVISKDRSEILIDI-GAKSEGIVFGREFDAV--RDLAAKLTAGDSVEATVVYPENDAGQVVLSLRKHSGDKLWKELEEKIESAEAITVVAIEANRGGIICEYSGIHGFLPAIHLHTQI-------------SSPGDFFGKTLQVEVIDVDRDANRLIFAQK--KDAKELEDVKKLLSKIEIGQKYEGEVKSVLPFGVFVQIE-----------DGIVGLVHISEIAWEKVDDPTKFFKVG…
>CPR_MG_Curtissbacteria_GCA_001774945.1
----------M---------------TLKKSDP-----------------------------------------ILQVLSTK------AKS-A------------------FK-K-PT----TM----------A-ELLASTGNKI--PVLRRGQEVTGKVISVSRQEILIDI-GAKSEGIVFGREFASV--RDLAANLSAGDQIDAIVIYPENDAGQVVLSLRKLSGEKRWEELEVKKSGGESIDVIAQEVNRGGIICDWLGLRGFLPASQLAHSTGSGQALSGQAQPQANMNDLIGKTLKVKVIEVDKNTNRLIFSQKQP-DETSLKNLQKLLLRVDIGDKYTGTVSAVLPFGLFVEIDVQEESSDTSRTSKLEGLVHISEISWEKVEDVAKLFKVG…
>CPR_MG_Curtissbacteria_GCA_000995995.1
----------MV------------------------------------------SQKFR----------------DKQLQSN------TDK-K------------------SQ-L-TS----SF----------A-ELFESSQKKV--TSLRRNQEVVGRVISVSPQEVLIDI-GAKSEGIVLGRELSAV--SELVSKLSAGDSVEATVLYPENDAGQVVLSLRKLSGEKRWVELEEKKDNSEDIEVVALEVNRGGVICDYLGIHGFLPASQLTQSSG-----SGQAKEPAKLTDLIGRTLTARVIEVDRGSNRLILSQKQP-NKKDLEAILALLAKVKIGDKVSGVISAVLPFGIFVEIDTDKVSSKSSKPSKLEGLVHISELSWEKIEEPAKFFKVG…
>CPR_MG_Curtissbacteria_GCA_001776475.1
----------MISR-----------NRLQDTSK-------------------KPSRFSTG-----------RLATLRPFEKS------QGK-L------------------AQ-G-KP----TM----------A-DLLAATGYKI--ASLKRNQEVSGKIVSVSPDEVLVDI-GAKSEGVIAGRELQAA--SDLIANLSVGDTIDATVLYPENDAGQVVLSLRKLSADARWGELEERRESNEEIEVVALEANRGGVICEWQGIRGFLPASQLSKT-------------PAKLSDLIGKSLSARVIELDRGSNRLILSQKQL-DKGDLSQILALLSKIEIGQKLAGVVSAVLPFGVFVEVEVGSSGRQPENLDKLEGLVHISEISWEKVEDPAKYFKVG…
>CPR_MG_Curtissbacteria_GCA_001775025.1
----------M-------------------------------------------KQKTS----------------SQKPPKE------AKK-S------------------HM-R-PI----TM----------A-DLLEQSDYQV--RSLRRNQEVKGKIIAVSPSEILVDI-GAKSEGIIAGRELTDA--VDIVSNLSVGDTLSATVLYPENDAGQVVLSLRKLSEDIRWRELEEKRESDEEIEVAAAEANRGGLICDYLGIRGFVPASQLVGA-------------PTDLSDLIGRTITVRIIEVDRNSNRLILSQKSP-DTKDIAQIQKLLSQINIGDTMAGIVTAVLPFGVFVEVGVASAGRGEDVLEKLEGLVHISEISWEKVEDPAKYFKVG…
>CPR_MG_Curtissbacteria_GCA_001776375.1
----------MVLRPVRKS---KHTKSRRDTSP-------------------KSSKKASF-----------R-SIRSTLSTS------SGQ-AHSG-----------SLRASD-K-KL----SF----------A-DLFKASESKV--PALKRNQEVSGKIVSVSRNELLVDI-GAKSEGLLAGHELTAA--ADLVSDLSVGDPIEATVLYPENDAGQVVLSLRKLSGEKRWKELEEKKENHEDIDVVAMEVNRGGVICEYLGIRGFLPASQLVKA-------------PSKLEDLIGKTLNARVIEVDKQSNRLILSQKQP-EKKDLKEVVKLLSKVKIGEEISGVVTAVLPFGIFVEVDIGRSGQKPDNLSKLEGLVHISEISWEKVEDPAKYFKVG…
>CPR_MG_Daviesbacteria_GCA_001777495.1
----------M---------------------------------------------------------------------------------------------------------SI----SM----------A-ELLAKNTSKF--KTFKQGDKTTGQIISRTDSDIIVDI-GAKAEGILSKKDFAPD----ALSALKIGQNIESFVVSSETD-GQILLSLYPPRQSKKWQKVSQAWCRKTTLQGQVLEANKGGYLIEAEGVRGFLPASQ------------------SSIETKVGDTIPLTVLEIDEKDNRLIFSSRRQLSK----EMLLKLAKIEVGQEITGKLVVVAPFGLIVTV------------DGLEGIVLSREISWEDE-NFAEEFQVG…
>CPR_MG_Daviesbacteria_GCA_001776975.1
----------M-----------PHM-------------------------------------------------------------------------------------------AT----SM----------A-DLMAQMDKKT--LKVQRGDSVTGKIILLSENEVVVDL-GGKNEGVLDKRELPQG----QLDSLRVGDELSSFVTSSENDTGRIILSPRRSKDPKKWLKFTHYLTSHSKLRGQVIEINKGGFLVEAGGVRAFLPGSQLSLQA------------LKIKPDLVGEEIDAYVLEVDESDNRLVLSLHNPTE-----AKKIDLANFKSGDKVKAQVVAVFPFGAYLDV------------NDVEGIVRGSDISWEKDIDPTTLYQPN…
>CPR_MG_Daviesbacteria_GCA_000996555.1
----------MS------------------------------------------------------------------------------KIS--------------GKASSS-T-PL----SM----------E-ELLASYSKKV--NNFSRGDKVEGEVIALTASEVIIDF-GGKSEGLINKKEFIPT----DREKLTLGDKISAYVVNGEGELGQIILSLKPPLSSRRFEKFSQAMGKKVHFIGKVVELNKGGFVVEAEGIRGFLPISQIALKQ------IRTNHQSEGLEGLIGAELSLKVIEVDPANNKLIFSTRQALTE----EEKEKIGKLEIGQQVKGQVELVAPFGLLVQVKDPS------FEGEVEGVIFSQEISWERETDLESSFQVG…
>CPR_MG_Daviesbacteria_GCA_001776835.1
M---------M-----------PYW-------------NFP-------------------------------------------------RIT-------------------KIT-MT----TM----------A-DLMASLDKKH--ISFSRGEEIKGEIVQISESEVIVDL-GGKSEGALNKRDFLPE----QLEELKIGSEIKAFVLTPENESGQVILSLFRAVQAKKWQKFITAQQRQTTLLGRVIEVNKGGLMVEIDSIRGFVPSSQVSLKS------------VAGFTELAGQELKLKVIEIDPGDNRLVLTARAELSD----DEQKSFSGVKSGDKVSGEVVAVAPFGLFVNVDGPPASQGEALRAGLEGVIFATELSWDKTQEEKPEFKVG…
>CPR_MG_Daviesbacteria_GCA_001776985.1
----------MA--------------------------------------------------------------------------------------------------------QM----SM----------A-DLMAKQDQKN--IRIERGQQVKGTVISILPSEIILDL-GTKAEGVLPKRELSQL----TIEGIEVGQEIETFVVASETPSGQVLLSLSRSSKNPKWNKFLDGLKTGQLFNGKGVEINKGGLVVEVSGLRGFVPSSQVSFSG------------ISKIEDLVGKELSLKVIEADPAQNRLIFAQKVVVSE----EAQALLKEMKVGDSVKGVVSAVLPFAVAMKL-----------ENGLDGMIHVSELAWEKTEDPTKTYTDG…
>CPR_MG_Daviesbacteria_GCA_001776785.1
----------MK-----------------------------------------------------------DSLQTTAKSSS------RKSVS-------------------G-Q-PT----SM----------A-DLLASQESKP--LSISRGQEVDGEIVSISDNEIILDL-GTKSEGVLPKRDLSPE----QAANLKVGDKLLTFVIQTENESGQVVLGLQRSLKTKQWYKFEAALKSNSVLKGKALELNRGGLIVEVEGIRGFLPSSQVTLSQ------------AANLEELVGKDVDVTPIEVEANQNRLIFSQKTTVSE----DIKENLSKLKAGDEIKGVVAAVLPFGIFVTL-----------QSGVEGLVHVSEISWEKTEDPSLVYKVG…
>CPR_MG_Daviesbacteria_GCA_001777095.1
----------MDL--------------------------------------------------------------------------------------------------------------M----------E-ELLASLSSTP--ISLERGQEIEGKIISINSNEITVDL-GLKSEGVISGREFQN----DVKNKLKTGDTIKAIVSEVENENGQVVLSMQRSGQKKA----------------------QA--------------------QT-------------QD------------------------------LE-----KWNDLIKKLDGQDIIKGKVTKITQFGIFVEL-----------QGGIEGLIHISKL------KSDDKFEVG…
>CPR_MG_Daviesbacteria_GCA_001777435.1
----------MA----------------------------------------------------------------------------TKTIN---------------------S-NP----TM----------E-ELLASRRSKP--LTLYRGQEVEGEIVAKNERELILDL-GAKAEGVISVRDIPSS----QQDSLKVGDKIKAFVIVVENESSQAVLSFHPAVEGSNWSKFQTAQNQKSKLSGRVIEVNKGGLIVEVTGVRGFLPNSQVGFEL------------LKGMEGLIGQDISVAVIEIDATNNKLIFSQRGKLED----MVLKQLEGFKNNQKVSARIVCILPFGLVVSA------------EEVEGMVYISDVSWDKIDDLNSLFKVG…
>CPR_MG_Daviesbacteria_GCA_001776905.1
----------MA----------------------------------------------------------------------------KKSTNY----------------QLT-T-NS----IM----------E-QLLASAPKKL--ITPFRNQEVEGEIVSITQNEITLDF-NSKSEGVLPKKGFSKE----QLANLKVGQKLKAFVAEIENENGQTILSLHPTVSGVSYDGFIQAQKQKRELSGFVVEANKGGLIVDVSGQMGFLPNSQVGFDL------------LQNSADLIGKNVKLSVIEVDEGNNRLIFSQRTTLSD----ELKNKLTANKNKDQVSGKIVAILPFGLVVDV------------EGLEGLVFISDVAWEKIDDLSSLFKIG…
>CPR_MG_Daviesbacteria_GCA_001777055.1
----------MA----------------------------------------------------------------------------KQ--------------------QNS-S-NS----IM----------E-KLLASQNQRI--IRLSRGQKIEGEIVSITDKEITLDL-DTKAEGVLQRKEAQD-------QSLKVGDKLKAYVYQTENESGQVVLSASQQTRGLAWDKFIRAQTLKSRLQGQVLELNKGGLIVEVEGVRGFLPNSQVGFDL------------LGGMESLIGQILNLGVVEVDRNNNKLIFTQRGQVTD----EVKNKLKEFKSNQRSGGKIVAVLPFGLIVSVKDRSSS---RDEMGVEGLVFISDVSWEKVEDLSKDFKVG…
>CPR_MG_Daviesbacteria_GCA_001779745.1
----------MV----------PNSKRFS------------------------------------------RLCENTSLKERRCSC--AKSNS-------------------S-NNPT----TM----------E-ELLASQTQKL--TTLHRGQEVEGEVVSVSDKEIIVDL-GTKSEGMITTREIPQE----IKSNLKVGSKLKAFVVMSENEHGQTVLSYQRQTAFADWGKFITAQNQKSKLQGKVTEVNKGGLIVEVSGVRGFLPNSQVGFEL------------LQGMDNLIGQDLTVTVIEVDADNNKLIFSQRGQISE----EIKEKLKSFKPQQKVTGKIIAILPFGLVVNI------------DGAEGLVFISDVSWDKVEDLAKLYGTG…
>CPR_MG_Daviesbacteria_GCA_001776635.1
----------M-----------------------------------------------------------------------------------------------------A-N-NI----TM----------E-ELLASQTKKV--VNIFRGQQVEGEVVSKTKKEIILDL-GAKSEGTIATREIPQT----ELKDLKVGSKLKAYVYMPENEHGQIVLSWQRQVSFIDWSNFREAQKQKSKLQGGVVEVNKGGLIVEVSGVRGFLPNSQVGFEL------------LEGMDNLIGQDLEVVVIEVDQGNNKLIFSERGQVSE----EVKEKLKKYKSDQKVSGKIVAILPFGLVVDV------------EGSEGLVFISDVSWEKMEDLSAQFTPG…
>CPR_MG_Levybacteria_GCA_001782015.1
----------MLENSK---------------------------------------VKTQKLK------------IDSTTLIP------ASK-------------------SQH-K-VM----SM----------A-QLMSSFSSKM--VFLKKGETVEGTVKKLTPQEITLDI-GAKSEALVLEFDKSNV--NNLLKLLKVGDKVKATVLSPESEEGFPVVSLRRTLDDLIFSGLQKIFEKEDSLDVYISEATRGGFFAETEMVRGFLPNSQVL-----------------SEYNLVGKTIKVKIIEFDKAKKRVIFSEKATSYLM---NPLEIEKAVKKNSVIEAAINNVTNHGLYVSIST-------ENGQLVEGFIHISEVSYQRVENLQNMFNKG…
>CPR_MG_Levybacteria_GCA_001873215.1
----------M------------------------------------------------------------------VQSTT------KSS-------------------KTG-Q-AS----SM----------A-DLVRSNAGAF--QTIKKGDIVEGTIKKLTPKEILLDI-GAKGDALVIEYDKKNL--ENLLALLKVGDKVKASVISAESEEGFPVVSLRRMLDDIIYNRFEDATSGNKSLFITITDSTRGGYFGQTDGIRGFLPNSQVID-----------------EESLVGKKTEVKIIEFDRDKKRVIFSQKATKYVI---DPEVISQSAKKGDIVEGAVTNVTSYGLYVTIKS------KKGDGLIEGFIHISEIAYERVENLSSLYKKG…
>CPR_MG_Levybacteria_GCA_001782675.1
----------M--------------------------------------VVKLFKFKGKEVL------------CMAISNNS------SSK-------------------SSK-P-AS----SM----------A-ELMSRKAGNL--QILRKGQQITGTIKKLTPREILMDI-EAKGDALVIEYDRQNL--ENLLTFLKVGDRVSATVISPESEEGFPVLSLRRTLDDIIFERLEELSKKEEAFEVEVVESTRGGYFALTQGIKGFLPSSQVSG-----------------GENLAGRKIQVKILEFDRARKRIVFSQKALNFVM---NPATLREFVKPGETVEGEILSVAPYGVFVSISKNGS----GDGKAAEGFIHISEVSYQRVENLPQKYKSG…
>CPR_MG_Levybacteria_GCA_001783795.1
----------M--------------------------------------------------------------------PSS------KIS-------------------SNK-P-AS----SM----------A-ELMAKSSSSF--QVLQKGQAVTGRIKKLTNTEILMDI-GAKGDALVIEYDRQNL--ENLMSFLKVGDEVTATVISPESEEGFPVLSLRRALDERIFKRFEELVRNEEAFEVEILEATRGGYYAATEGIKGFLPSSQVEA----------------NQEDLVGKKIQVKLLEADRVKKRVVFSQKAINFTT---NPDAIKKYLKSGDVVEAEVATVTPYGMYVVIVP-------QKDIKIEGFIHISEVSHDRVEDLMSKFKTG…
>CPR_MG_Levybacteria_GCA_001783815.1
----------MVDNLK------PKT----KNSSKPVRQGKP------------------------------AGSMAELTRST------SSG-------------------SRK-P-AS----SM----------G-ELMAKQGSFF--QVLQKGQAVSGIIKKLTPQEILMDI-GAKGDALVIEFDKQNL--ENLLANLKVGDRVTATVISPESEEGFPVVSLRRMLDDIIFNKFEDLARRDEAFEVEVAEPTRGGYFTLTEGVRGFLPASQILS-----------------QESGPGAKIKVKILEYDRSKKRAVFSEKATFFLT---NIDSIKALLKPGEIIEAEITEVAPYGLFVKIEPPARSPGGKGEAVVEGFVHISEISYARVENLGASYKVG…
>CPR_MG_Levybacteria_GCA_001782355.1
----------MAT------------------------------------------------------------------SKS------NKP-------------------QST-K-AT----SM----------A-ELMARPQVSF--YVPQKGENVKGIITKLTSSEILVDI-NAKTEAVVLEKEKKLL--KNIVSNLKIGQEVEVTVLNPESDMGHPVVSLRKFLNTINWQKFADLQKNKQDLEGVATELTRGGYLVETYGVSGFLPNSQANV--------------STNPQDLIGKKIKVFIWELNRPQNKIIFSQKPMQTRE---EFEKVTLHITVGDKLEVTISNITPFGLFVVLPKS------GSEQALDGLIHISEISWEKVENLDELFSQG…
>CPR_MG_Levybacteria_GCA_001783805.1
----------MQ----------------------------------------------------------------------------TST-------------------STK-K-AT----SM----------A-DLMKKAKTPF--VSPHKGDMLTGTITKLTSGEILVDI-NAKTEAVVLEKERQIM--NKILTSYKVGDKVAVQVLNPESDFGYPVVSLRRSVGDITWDRLAKLQKSQEPVEVNLDMATKGGFLGTTDGISGFLPNSHTSS--------------LENPNNLIGKKIKVVVLELNRELNKIIFSQKQVMGPA---DFQKLIGNLKVGQKIDAVVSNVAPFGVFLSIPVDPEGDGAGDGKLAEGFIHISEISWENVENVADLFKLG…
>CPR_MG_Levybacteria_GCA_001782075.1
----------MA--------------------------------------------------------------TIKSKINN------NTS-------------------YSA-G-AT----TM----------A-ELMKSARVSF--STYHKGDEASGIITKLDKSEILVDI-NAKTEAVVLEKDKKIL--GKILASVKLGDKVSVRILNPEGEMGNPVVSMRKFVDDMVWDKLYNLKKNQEVLDATVNSVTKGGYLVTADGVSGFLPNSHISN--------------LENPGDLIGKKIKTVVLEANRELRKIIFSQKQVLGID---DFKKSVKGLKEGQEIEAVITNIASFGIFLSVSV--------EKRVVEGFIHASEISWENITNVPEEFKVG…
>CPR_MG_Levybacteria_GCA_001782165.1
----------MAKKVQ-----------------------------------------------------------SSEFRVQ------SSK-------------------SNK-K-PQ----SM----------A-QLLASRKPSF--VTPHKGDIIEGKITKLTSGEVLVDI-NAKAEAVVLEKDKKIL--RNILSSLSVGDKVNVQILNPESEMGNPVVSLRGFLNNRLWAKVTELKEKREVLDVVVNEAIKGGLLVSANGISGFLPGSQVSFAS---------SNFEEGFSSMVGSHIKAIILEADRATNKIIFSQSQSVTTG---DFRQTIKGLKIGEKITTTITNVTPYGLFVSVPI--------ERGAIDGFIHISEISWDKITDIFSMYKTG…
>CPR_MG_Levybacteria_GCA_001782085.1
----------MTKKVQ-----------------------------------------------------------SSEFRVQ------SSK-------------------SNK-K-PQ----SM----------V-ELLASYKSPF--VTLHKGDIVEGKITKLTSGEILVDV-NAKAEAVVLEKDKKIL--HNILSSLSKGDKVTVQILNPESEMGNPVVSLRRFLDNKLWDRVEELSKNKKAIDVTIDGVIKGGLLVSGDGISGFLPNSQLSFASHT--------KTQGSSQNIAGSKTRAMVLEVDRETRKIIFSQSHVLNQD---DFEKEIKGIKTGQKVTASVTNVTPYGIFVSVPN--------GERVVDGFLHISEISWEKVLDTSSLYNTG…
>CPR_MG_Levybacteria_GCA_001782475.1
----------MAIQNQ-----------------------------------------------------------KSKIKNQ------NLT-------------------SSK-K-PQ----TM----------A-ELLASHKSPF--VTFHKGDIIEGIITKLSSSAILVDV-NAKAEALVLEKDKKIL--HNILSSLSVGDKVLVQVLNPESEMGNPVVSLRRFLDNKLWDRVGELQKSKKAIDVMVDNIIKGGLLVTGDGISGFLPNSQLSFATFA--------TSDGSTQKLVGSRIKAIVLEVDRAAHRIIFSQSHVLNQG---DFEKEIKGLKTGQKVKASVTNVTPYGIFVSVPN--------GERVLDGFIHISEISWEKVLDTASLYKLG…
>CPR_MG_Levybacteria_GCA_001783725.1
----------------------------------------------------------------------------------------------------------------------------------------------------------------------------------------------------------------------------------------------------------------------------------------------------------------------------------------------MAKFSPEQKIYATITNITPFGIFVSLQG--------KEKPIEGFVHLSEISWEKLENVPSSYKIG…
>CPR_MG_Levybacteria_GCA_001782565.1
----------M-----------------------------------------------------------------------------ATS-------------------KSS-R-AT----SM----------A-ELMSRSSSNF--KTFKKSEIAEGVITKLTSGEILVDI-GAKAEAQVLEKDKSIL--RSILSSLKVGDKVVVSVLNPESDMGFPVVSLRRFIGDIFWKNLDTLLKDKKVLDVLVTEATRGGFLVETDGKQGFLPNSHAVF--------------SGSSESLVGAKIKAAIVDLDRASNKLIFSQKATIDPE---QFGKLTKNLKVGESFDALVNSVTPFGIFVSFQK--------DGQNYDGFVHISEVSWERKENLEEEYNSG…
>CPR_MG_Levybacteria_GCA_001782515.1
----------M-----------------------------------------------------------------------------------------------------A-K-AT----SM----------A-ELMARTSSSI--KSFKKGEEVEGTITKLTKSEILVDI-GAKTEALVLEKDKTNL--KNIISSLKVGDKVFVTVLNPESDQGNPVVSLRRFIEKRQWEALEKLKNDKTPVDVIAQGSTKGGFLVTTAGISGFLPISQTNL--------------SESTQNIIGKKIKALVIDVNRTSQKVIFSQKAAIGDE---DFDNAVGMFKNGQIVDAKVAGTTSFGIFVSIKN--------TEPGPEGFIHLSELSWDRLESAENFLKVG…
>CPR_MG_Levybacteria_GCA_001784125.1
----------MVNNNSS----------------------------------------------------------SKSSTKA------RSV-------------------GSG-Q-AV----SM----------A-DLMAKTQTKF--RSFKKGEVLEGVITKLTSSEILVDI-GAKTEAVVLEKDKALL--RNLLSKLKVGDTISVSILNPESDLGYPVVSLRRFMEDKVWVKIDKYLADRTQLDVLITGITKGGFLARTDGISGFLPNSQTVF--------------LEEPASLSGQTIKAVIIEAQRAAHKVIFSQKEAVGSK---DFEKVASGFKTGDSLPVTVTNIAPFGLFVSVTG--------KDGQIEGLIHVSEASWEKIDDLSKNFKVK…
>CPR_MG_Levybacteria_GCA_000994125.1
----------MANSNHKSQ-TNPKS----------------------------------------------KLQGMKGGQAS------RST-------------------SSG-S-AT----SM----------A-ELMAKAKTPP--RAFKKGEIIEGTITKLTSVEILVDI-GAKTEAVVLEKDKALL--KNLLDKLRVGDKITVSVLNPESDLGYPVVSLRRFMENRVWEKIEKLVSGKADLEITITGITKGGFLARTDEIGGFLPNSQTVF--------------VEELESLVGSRIKAIILEAQRDTHKIIFSQKEAVNES---DFEKIAASIKAGQTVKATVTNIAPFGLFVSIPS--------GDGFLEGLIHVSEVSWDKIDDLSKHFKLR…
>CPR_MG_Levybacteria_GCA_001783735.1
----------MA----------PNS----------------------------------------------TSSFAKASEDR------QKS-------------------KSS-K-AT----TM----------A-DLMKSVQTKF--VSPKKGEVLEGIITKLTSAEILVDI-GAKTEAVVLEKDGKIL--RSLLSTIKIGDKVTVSVLNPESDLGNPVVSLRRFNEDRVWEKLNNLLKTKEQLDVIIDEVTKGGFLVSTDGISGFLPNSQASF--------------LNAQADLPGKSIKASVIELNRPAKKVIFSQKTAMGGQ---EFDSAVKNIKRGQKIACVISNITPFGIFALIES--------DGQNVEGFIHISEVSWEKIQAIPQSFKQG…
>CPR_MG_Levybacteria_GCA_001782415.1
----------MA-----------------------------------------------------------QSSKFKVQSKP------QAS-------------------KPG-R-AT----TM----------A-ELMLKSKTAF--VSPQKGEILEGIITKLTSSEILVDI-GTKSQAVVLEKDRRIL--KSLLDSLKIGDKVGVQVLNPESEYGNTVVSLRRFNEGKIWERLEILQKSKEKIDAKIDATTRGGFLVTTDGISGFLPNSQVSI--------------LPQNENLTGRPIKISVIELSRPLRKIIFSQKAAIDNV---QFENAAKNFKRGEKIEASISSIAPFGIFTIL-----------NGDLEGFVHLSEISWDKLTVVPEEYKVG…
>CPR_MG_Levybacteria_GCA_001782035.1
----------MA-----------------------------------------------------------QSSKFKVQGKP------QTS-------------------KPG-Q-AK----TM----------A-ELMASSKSSF--VSPKKGEILQGSITKLTSSEILVDI-GSKSPAVVLEKDKRIL--KSLLDSLKVEDKVDVQVLNPESEYGNTVVSLRRFNEGKMWEKLEDLQKSKEKITAVIDASTKGGFLVTTDGASGFLPNSQVSL--------------LPQNENLAGKAIKVSVIELSRPLRKIIFSQKAAIDNV---EFEKSTKNYKRGDKVVVKINSIAPFGIFAVL-----------NESLEGFVHLSEISWDQLSEVPKDYTVG…
>CPR_MG_Roizmanbacteria_GCA_016700135.1
----------MAK----------------------------------------------------------------NQPKK------QTT-T------------------GK-E-AH----PM----------E-ALLQN--QAV--SNIQKGKEMDARILTLSKKNVLFDV-GAKAHAVLGEKELKEI--TTYLPYLKEGDKVHVRIISEESREGFPVVSMRTFFEKGKWDILQQKKKNEEDIDVICGEYGKGGVFVDFMGIRGVIPKIQLTTDF------------LEDPSKLEGQRIKVKVLEVDEEKNRLVVSQKAAVLNISQKDLKERFDKIKLNEEYEATVLGVSEFGIFCEV------------NGVEGLVHISEISWEKVTNASVYVKQG…
>CPR_MG_Roizmanbacteria_GCA_016699265.1
----------M---------------------------------------------------------------------SK------SQQ-K------------------IS-G-VN----PM----------E-LLLQK--QQV--PNIKKGQEINAKIVSITKKGTLFNI-GSKANAVLGEKEIKEI--FLYQSHLKPGDTVKVRIISEESRDGNPVVSMRNFFERGKWDVLLKKKETEEDIEVMCGEFGKGGVFIEFMGIRGVIPKIQLTQDF------------LAHPEKLVGQRIKAKVLEVDQEKNRLVVSQKAAVLNISQKDLRKKFDKIKAGDKKKAKVLGASEFGIFCEI------------DGVEGLIHISEISWEKVRDVSHLVKVG…
>CPR_MG_Roizmanbacteria_GCA_001790075.1
----------MPK----------------------------------------------------------------VSATK------SKK-I------------------TL-Q-PS----SM----------E-ELLKSV-GKL--PRVRKGDIIDAKIIAISKKEMLFDI-GWKTNAILIAPETKEL--PTFMPYLKIGQTLPIRVINVEARAGFPVVSLQNFFEKGKWQILEECFTKEELIKVSVLGSGKGGLFIEVMGIRGVIPKIQLTQEF------------LQHPDKLYAKKVEVKILEVDRSKNRLVVSQKAAALGITQKELNKTFKKIKEGQTYKARIIGFSDFGIFCEV------------EGIEGLIHISEISWKKVADPRQHAKEG…
>CPR_MG_Roizmanbacteria_GCA_001787945.1
----------MATKKALA-------KKTIKPTA----------------------------------------TAQKVTASP------KKS-A------------------PQ-A-AG----SM----------A-DLLKN--NSF--TPPKKGREVDAKIIAITKKGILFDV-GWKSYAVLGQLEAADL--STYLPFFKEGDTVKVRIVVEESKEGYPVVSMRKFFEKGKWDILENKQKNEEEIDVLCGDYGKGGIFIDFMGIRGVIPKIQLSKDF------------INTPDKLRNQKIKVKVLEVDRTKNRLVVSQKASALGISYKDIRKEFDNIEVGKTYKARIIGFTEFGVFCEV------------GNIEGLIHISEISWRKISDPRASLKEG…
>CPR_MG_Roizmanbacteria_GCA_001788225.1
----------MAK----------------------------------------------------------KIKKDTSTKTP------DSS-A--------------PHPSKK-K-ST----TM----------E-QLLQK--HLI--HPPKKGDQVKAKVISIDRKQVLFDI-GWKSFAVLGEYETKEL--ATFLPYLKVGDSVAAKVVVEEAKEGYPVLSLRKFVEKGKWEILEEKQKKEEEIEVVCGDYGRGGIFIDFMGIRGVIPKIQLTESF------------INDPNKLYNQKIKVKLLEVDKSKNRLVVSQKAAALGISYTKLKEKFDEVKVSEKYKAKVIGFSDFGVFCEV------------DGIEGLIHISEISWSKIIDPSKSLKVG…
>CPR_MG_Roizmanbacteria_GCA_001789365.1
----------MP-------------------------------------------------------------------KVT------KKN-T------------------PF-P-AT----SM----------D-QLLQS--VSF--QPPKKGLETDAKIVSISKKGVLFDL-GWKSYAVLGELEVQEL--GPFSAHLHVGDEVKVRVVVEESKEGYPVVSMKRFFDKGRWDLLEEKFKNEGEIEVMCGDYGKGGVFIDFMGIRGVIPKIQLTQEY------------IDSPQKLKGQKLKTKVLEVDRQKNRLVVSQKAAVLGISYKSIKEKFDKIVIGKKYKAKIIGFSEFGVFCEV------------DKIEGLIHISEISWAKVIDSSKYLEVG…
>CPR_MG_Roizmanbacteria_GCA_001788095.1
----------MTK----------------------------------------------------------GVLQMSPQKSK------TSK-K------------------IS-A-PQ----SM----------A-DLLKQ--QPF--SPPKKGEIVNAKIINLSKKGITFDI-GWKSYAVLGNIESQEL--TSYLPYLKEGDSVAVKIVVEEAKDGYPVVSMRSFFNKGKWDILEEKFKKEEEIEVICGEYGKGGVYIEFMGIRGVIPKIQLTEDL------------IKDPGKLEGQKVKVKVLEVDRDKNRLVVSQKAAALGISYKELQKEFDVIEVGKKYKAKIIGFSDFGVFCEV------------EKIEGLIHISEISWQKVTNPKKHLKVG…
>CPR_MG_Roizmanbacteria_GCA_001788045.1
----------MA----------------------------------------------------------------------------KSN-K------------------TT-S-AH----PM----------D-ALLKT--QEL--PRIKKGEEIEAKILSISKKGVLFDI-GAKANAVLGEREVKEI--TTYLPYLNEGDRVKIKIVSEESRDGYPVVSMRSFFEKGKWDILLDKKEKEAEIDVLCGHYGKGGVFVEFMGIRGVIPKIQLTEEY------------LNNPEELDGKKLKVRVLEVDRDKNRLVVSQKASALNISQKDLKKKFDKIKIGDKYKAKVLGVSEFGIFCEV------------EGVEGLIHISELSWEKVSDVSSYAKQG…
>CPR_MG_Roizmanbacteria_GCA_001789535.1
----------MPN--------------TAKKTT-------------------KIPKKIS----------------LKATKNP------SAK-S------------------TS-P-AH----PM----------D-ALLAK--QTI--TSIKKGQEVDARIVGISKKEVLFDI-GAKANAVLGDRETREI--STYLPYLKEGDSVRARIISEESKEGFPVVSLRNFFDKGKWNILIAKKEKEEEVEVMCGEYGKGGVFIDFMGIRGVIPKIQLTDQY------------LASPEKLIGQKIKVKVLEVDQAKNRLVVSQKASVLKISQKGLKKQFDKIKIGEKKKAKILGVSEFGIFCEV------------DGVEGLVHISEISWEKVSDISSFAKPG…
>CPR_MG_Roizmanbacteria_GCA_001790155.1
----------MPK------------------------------------------------------------KTKTKSTKE------KEV-I------------------PS-G-VH----PM----------E-LLLQK--TKS--IKLKKGNEIEASIISISKKGALFDI-GAKAYAVLGEKELKEI--STYLPYLKAGEKVQARIISEESKEGFPVLSLRKFFEKGKWEILKIKKEKEEEIEVVCGEYGKGGVFVDFMGIRGVIPKIQLTEDF------------LQSPEKLNGQKIKVKILEVDEKKNRLVVSQKIAALKISQKELLEGFEKIEVGKTYKASVLGVSEFGIFCEV------------VGVEGLIHISEISWEKVSDPSVFAKIG…
>CPR_MG_Roizmanbacteria_GCA_001789805.1
----------MRM--------------------------------------------------------------ASKKTTK------KAI-N------------------SQ-S-TH----PM----------E-ALLKS--KKL--ATVKKGQEVEAKILTLSKKGILFDI-GAKAHAVLGEREVKEI--STYLPYLTLGEVVPVRIVAEESKEGFPVVSMQKFFDRGKWNILIDKKEKEEQIEVVCGEYGKGGVFIDFMGIRGVIPKIQLAAEH------------IDSPTKLYNQKIKVKVLEVDEAKNRLVVSQKAAVLNISQKELKERFNKIKVNKEYKAKVLGVSEFGIFCEV------------DDVEGLVHISEISWEKVTDASTFVRPN…
>CPR_MG_Roizmanbacteria_GCA_001787935.1
----------MA------------------------------------------------------------------------------T-T------------------KK-N-IH----PM----------E-ALLKT--ARP--PRISKSQEQEAIIISLSNKGVLFDI-GAKAHAVLGELEVKEI--STYLPYLKEGSKIKVRIVTPESKEGYPVVSMRKFFQKGKWEILHEKKEKEEEIEVICGDYGKGGVFIDFMGIRGVIPKIQLVENY------------MNHPEKLNRQKIKVRILEVDEEKNRLVVSQKAAVLGISQKELKARFKKIKEGKIYKAKILGVSEFGAFCEV------------EGVEGLIHISEISWEKVSDAAEFLKNG…
>CPR_MG_Roizmanbacteria_GCA_001788055.1
----------MT------------------------------------------------------------------------------K-T------------------KK-S-TH----PM----------D-VLLKT--NSP--PKISKSQELAATIISLSKKGVLFDI-GAKAYAVLGDLEVKEI--STYLPYLKAGNKIKVRVVAVESKDGYPVVSMKKFFQKGKWEILKAKKEKEEDIEVVCGDYGKGGVFADFMGIRGVIPKIQLTEPY------------ISQPEKLTNQKIKVRILEVDEEKNRLVVSQKAAALGISQKDLKEKFDKISEGKTYKAKILGVSEFGAFCEV------------DGVEGLIHISEISWEKVANASEFVKPG…
>CPR_MG_Roizmanbacteria_GCA_000991535.1
----------MCYSIWS-----------------------------------------------------------KEIFLT------MVK-S------------------TT-T-KH----PM----------E-ALLKG--QSL--PRIKKGEEIEAKIVFLSKKGTTFDI-GGKALAVLGELEVKEI--TTYLPYLKQGDTIRVRIISEESKNGYPVVSLQRFFEKGKWEILKEKKEKEEEIEVVCGEYGKGGVFVDFMGIRGVIPKIQLLENY------------MSDPEKLHGQKIKVKILEVDKEKNRLVVSQKASVLKISQKDLRLKFDAIKEGEKYKAKVLGASEFGVFCEV------------EGVEGLIHISEISWEKVSNASSYVQTG…
>CPR_MG_Roizmanbacteria_GCA_001789855.1
----------MALLIPAAF---GENFRMAK---------------------------------------------KTEKTTK------TAK-N------------------TA-A-TN----PM----------A-ALLSK--NKP--SLLKKGREIEAKIVSLSKKGIVFDV-GGKAHAILGELEIKEV--STYLPYLKAGDKIQVRVISEESKNGFPVVSLRKFFEKGKWEILAEKKEKEEEIEVFCGDYGKGGVFVDFMGIRGVIPKIQLVEPF------------ISSPEKLTGQKIKVKILEVDKEKNRLVVSQKASVLKISQKDLKKKFDAIKEGKTYKAKVLGASEFGVFCEV------------EGVEGLIHISEISWEKISSAASYVTVG…
>CPR_MG_Roizmanbacteria_GCA_000990725.1
-----------------------------------------------------------------------------------------------------------------------------------------------------MLSPDDRI----------------------------------------------------------------------------------------------------------------------------------------------------------------------------------------------------FRFFSLF---------LRN------WRLNNLGVGLIENPKEVVKIG…
>CPR_MG_Gottesmanbacteria_GCA_001779235.1
----------MTKKQTTDI------SKAKTSTDAKV-------------PTGRQKTKSP------------KTTSILKDQTP------LNP-T------------------YK-E-PQ----TM----------D-ELLSQSGEID--FGVKKGDTIEGSLISASSKEILFDI-GKKSYGIVAEWELDQI--KDYINNLQPGEKVTGHVISPENDNGYIVISLRRANVENRWTVLIQSKETGTDLEVTGLESAKGGILVDWQGLRGFIPSTQLESGH------------TGSPASLFGKKITVKVIEVDHASNRLVFSQKAAAFGVTPSMQKKMLDKVKPDDELKGVISGIAPFGVFVDI------------EGLEGLVHISEIAWEKVENLNNLYKVG…
>CPR_MG_Gottesmanbacteria_GCA_001779195.1
----------M-------------------------------------------SKKQN------------KKEEIKDTPK-------TSI-S------------------TH-E-PV----TM----------D-ELLKTYKGGV--FSVKKGETVSGAVVSVSPREVLVDI-GKKSFGVVAEWELDQV--KEYAAALKIGDRIIAQVVNPENDVGYAVLSLRKASHEQRWVKLTSAKESGEDLTVNGLEVAKGGLLVDWQGLRGFIPATQLEGEY------------AANPSILSGRSIKVKVLEVDKAVNRLVLSQKASVLGVTPTLQREKLEKIKTQDELKGTVSGVASFGIFVDV------------EGLEGLVHISEIAWEKVDNPSTMYKVG…
>CPR_MG_Gottesmanbacteria_GCA_001780955.1
----------MI-------------NKQKTKDKEL--------------ISSDISSTSK------------SSSVTAKSKRA------LFE-T------------------KS-E-PQ----TM----------D-ELLTMVGTIP--LGLKRGDTVEGKVIFVSSKEILIDI-GKKSFGIVAEWELEQV--AEYAKQLKIGDKVIAQVANPENDIGYVILSLRRASSERRWGLLSQLKETGEDLDVVGLEVTKGGVLVDWQGLRGFIPSTQLEGSL------------AIQPMALINKRMKVKVLEVDRAMNRLVLSQKASALGVTPTFQKEKLDKIKTGDTLQGVVSGIAPFGIFVDI------------EGLEGLVHISEIAWEKVENPANLFKVG…
>CPR_MG_Gottesmanbacteria_GCA_001871285.1
----------MIKKVKNKK---DKVEKSKVKSEI---------------DDLAVDKKAA------------KTESNLQTSSP------KKK-S------------------IK-E-PQ----TM----------A-ELLSMVGDVK--IGAKRGDTVEGKVVSVSSREILVDI-GKKSFGIVAEWELEQV--KEYASSLKPGINIVAQVMNPENDMGYVVLSLRRANFERRWLELDKAKEEGLDLNVSILEVAKGGLLVDWQGLRGFVPYTQLESSF------------ASNPLSLLGKRIDVKVLEVDKSLNRLVVSQKASSLGVTPSVQKEKLDKIKPNDVLKGIVSGVASFGVFVDM------------DGLEGLVHISEIAWEKVENPASIFKVG…
>CPR_MG_Gottesmanbacteria_GCA_000999095.1
----------MV------------VKDQKDTTI-----------------KAKISRKSV------------KTEHSAVTVK-------SSK-I------------------NS-N-PQ----TM----------E-ELLAVSGIST--FSMKKGDTVKGTIVSTSPKEILVDI-GKKSFGIVAEWELDQV--RDYVQNLKSGDKVVAQVVNPENEYGYTVLSLRKASMETRWQVLAGIKETGEDIEVTGLETAKGGILVDWQGLRGFVPSTQLETQF------------ATSPMQLLNRKIKVKVIELDQAINRLVLSQKASVLGVTPSAQREKLKKIKPDDVLKGNVSGIAPFGVFVDV------------DGIEGLVHISEVAWEKVENLTDLYKVG…
>CPR_MG_Gottesmanbacteria_GCA_001779275.1
----------M-----------PRISKSKTNKK-----------------ESKKATSKP------------ATINPTLTVSP------TRV-K------------------GR-E-PQ----SM----------D-ELLRESGITS--FSLKKGDTIKGTIISISSKEILVDI-GKKSFGIIAEWELDQV--RDYVKQLNVGDQVTAQVINPENEYGYTVLSLRKASMETRWEMLDEIKEKGTDIEVLVIEPAKGGVLVDWQGLRGFIPSTQIESNL------------VVNPYQLINKKLKVKVIELDRSINRLVLSQKASALGVTPSVQREKLQKIKPDDVLEGTISGIAPFGVFVDV------------DGIEGLVHISEVAWEKVENLSSLFKVG…
>CPR_MG_Gottesmanbacteria_GCA_000995105.1
---------------------------------------------------------------------------------------------------------------------------M-------------L---------------------------P---------------------------------------------------------------------------------------------------------------------------------------------------------------------------------------------------------------GKEGLVHVSKMAKDYVSNPEEVVKIG…
>CPR_MG_Gottesmanbacteria_GCA_001779095.1
----------MAT---------SKLKTKDGKEK----------------LKKTSQRKTEDKAT-------EATRKDTAAKTG------KKT-S------------------AT-V-AQ----TM----------E-ELLAQTGYVL--KGVKKGDVVEGIITNVNPREITVDT-GGKSDGVVIDRELESY--RDALLALKPGTKVVAQVIVAENDRGQSVLSLRRHIFEKRWSDLAKSKEEGATLEVTIKEVVRGGMLVDSGGLRGYVPQSQIDSSL------------GRQLDKSVGKRIQVKVIEVDRDTNRLIFSQRAVSEEETLSKQKQILTALTIGDSVQTTITGVVPFGAFAKFSVSKD----GKDHDVEGLIHISEIAWEKVEDPNQYLKTG…
>CPR_MG_Gottesmanbacteria_GCA_001779065.1
----------MAK---------SKLKAKKKS----------------------------------------VAETSDTSQIK------NPK-K------------------FS-E-PQ----NM----------E-ELLASTGYAL--KGVKKGDVVTGTISTVSPREVTIDI-GGKTEGVVIDRELETY--KDALMKLKRGDEVTAQVIVAENDRGQSVLSLRKSIFENQWQNLKKAQTDGLSLDVIVKESVRGGVLVDSSGLRGYIPQSQLESTF------------AKQLDKAANRKIKVKVMEVDRDTNRLIFSQKAVSEEESLERQKELLVNVKVGDIVEATITGVVPFGAFAKFKVTKD----GKDQDIEGLIHISEIAWEKVEDPIQYVTSG…
>CPR_MG_Gottesmanbacteria_GCA_001781025.1
----------MAKD--------SKLKTKEGN--------------------------------------------GNTSQKT------SIP-A------------------LK-Q-PQ----TM----------E-ELLALTGYKL--QGLKKGDVVKGVIGRVTPKEITVDI-GRKTECVVIDRELENY--KDALMALKTGDSVVCQVIVEENDRGQPVVSLRRSIFEKRWEDLVDHQKKGEPVEVLFKEPVRGGILVDYGGLRGYIPQSQLDSAM------------VKQMDKLSGRKVSAKVIEVDKATNRLVFSQRAVSEGEALAKQKEVLGAIPVGESVQATITGVVPFGAFAKFKVTKD----GVEHEVEGLIHISEIAWEKVDDPNSYIRPG…
>CPR_MG_Gottesmanbacteria_GCA_001780985.1
----------MAK---------------------------------------------------------------AKSKSS------PKS-T------------------IK-N-VQ----TM----------D-ELLAATGYNL--KGVKKGDLVEGTITRVSPKEITVDI-GGKTEGVVIDRELENY--KDTLMALKIGDHVAAQVIVAENDRGQSVLSLRRSIFEKSWKDLVAKQKSGVPVEVIVKDPVRGGLLVDYGGLRGYIPQSQLDGAF------------SKQLDKTSGRRIQVKVVEVEKETNRLVFSQRAMSEEAALSRQKELIDLIKVGEAVEATITGVVPFGAFAKFTVTKD----DKKHDVEGLIHISEIAWEKVDDPGQYLKVG…
>CPR_MG_Gottesmanbacteria_GCA_001779455.1
----------MV-------------------------------------------------------------------VKK------QKS-P------------------KT-S-PQ----TM----------E-ELLAQTSYTL--KGVKKGDVVEGKITRVSPREITIDI-GGKTEGVVIDRELETY--RDMLQSLKAGDTVVAQVIVAENDRGQSVLSLRRSIFEKRWKTLSDKKESGEMVEVILKEPVRGGILVDYGGLRGYIPQSQLDQSL------------VKQMDKITNRRIQTKIVEVDRETNRLVFSQRAVTDGENLIKQKEILSALTVGDDVQATITGVVPFGAFAKIKVTKD----GVEHEVEGLIHISEIAWEKVEDVNQYLKTD…
>CPR_MG_Shapirobacteria_GCA_000989305.1
----------MYLGYPIPR----------------------------------------------------YFKKMAKKIKV------SKK-K------------------NS-G-PM----TM----------E-ELLKMDGVQI--SGLKKGQDVKGKITTIKNKSIFIDI-GGKTDAVVMGKEYEFV--KDYVADLKVGDEIEVQVKHPENDKGQILVSIRGAASGYGWNYFTEKEKNEGEVTVFGKELNRGGVVVIAPGFFGFIPGSQIGSKY------------DIDPEKLLGKKIKAKVLEVDQSKNRLVFSERLVSEPNKVGEESVAIENLKLDDIFQAEVVRVEPFGIFVKVEESFD----GKPMKLEGLVHISEISWAKVDDVTGMFKAK…
>CPR_MG_Shapirobacteria_GCA_001873665.1
----------MF-----------------------------------------------------------IMKKTNKKKAL------ASV-K-----------------------------TM----------E-DLLKLGSSAA--VGFKKGEAVKGKISVIKNKSIFIDI-GGKTDAVVLGKEFEFV--KDYVSDLKIGDEIEVQVKSPENDKGQILVSIRGAASGYGWSYFTEKEKSGGEITVFGKELNRGGVVVTAPGFYGFIPGSQIGSKF------------DGDPEKLLNKKVKVKVLEVDQAKNRLVFSERLVSEPNKVGEESDAIEDLKLGDVFEAEVVRVEPFGLFVRVEKSLT----GGMMRLEGLVHISEISWEKIDNVANSYKSK…
>CPR_MG_Amesbacteria_GCA_000998305.1
----------MAKQ--------------------------------------KVNQSTQ--------------PADSVSKQV------SGK-R------------------VT-S-AS----TM----------E-ELLASDLSSF--KAFKPGDKVKGKITEITGKALFIDV-GGKSDAVVAGEEFDAS--REEIRGLKVGQEIEGMVVVPENEAGQMLLSLNRANSDSRWSTVEKLAKAGGVIEVVGKEITKGGLLVGLDDLVGFIPGSQLGRQW------------LGRAEELLGKKFNAVVLEADKVSNRLVFSQRAISDAEELTHKKETLSRVNIGDEYKGNVTGVMPFGIFVKIKIGKA-EGLEGVEELEGLVHISELSWTKITDPKSAFVEG…
>CPR_MG_Amesbacteria_GCA_000402715.1
----------M-----------------------------------------------------------------TLATKK------TTT-T------------------TT-A-PQ----TM----------E-QLLAGAKYEF--KSFKRGQTIIGKVSEIKGKVVYLDI-GGKAEGLLGDKEYEYS--RDYIKALKVGDEISALVISQENDSGQVILSLKRAANESRWKLFEKALADGTTLEVKGKEINKGGLLVEIEGVFGFIPSSQFSKEF------------SEDVDDLVGQTIKVKVIEVDREQNRLVMSEKAVTEAVEIEARKKAMSVVKVGETYKGKVVGVVPFGAFVEITV--------KKNVLEGLVHISELSWEKIDDVNKILKEG…
>CPR_MG_Amesbacteria_GCA_000997915.1
----------M-----------------------------------------------------------------------------AKT-K------------------TS-G-AS----TM----------E-ELLGQAGYSF--KGFKRGDHVTGVVSEISGRSIYVDV-GGKTEGIVAEKEYELS--KDYMKTLKVGDKVEAVVVSPESDAGQIVLSIKRAAADSRWKLFEDAMKNNVTITVKGKEMNKGGLLVEAEGVFGFIPSSQFSRAV------------VENPAALTGQSVEVKVIEVDREQNRLVLSEKAVTEAEEVEARKKALGLVEVGKIYTGSVAGIVPFGAFVSVKIGKG----KTIQNLEGLVHISEISWEKVEDVTKVLKEG…
>CPR_MG_Amesbacteria_GCA_001773615.1
----------M---------------------------------------------KVK----------------SQKSKVK------TGS-G------------------SG-E-PS----TM----------E-ELLASTGYKI--KGFRRGSVVTGRVVAIAGRAISIDI-GGKAEATVSDQEYDLS--RDYLKALKVGDTVTGVVVVPESDSGQVVLSLKRAVTDSRWKAMDKAFEEGDVVSVVGREATRGGLLVDVEGIYGFVPASQLSREW------------EGNVAGLVGRTFAVKVVEVDRGQNRLVMSEKAVTEEEEIGKRKASLSKVKMGGSYEGRVVGIVPFGAFVEIGL-------DGEEKLEGLVHISEISWEKVDDVNKALKDG…
>CPR_MG_Amesbacteria_GCA_001775605.1
----------M---------------------------------------------KAK----------------NQRSKVK------TGA-G------------------KG-E-PS----TM----------E-ELLASTGYQP--RGFKRGELVRGLVTEVTGRAVFVDI-GGKTEAVVSDQEYDLF--KDYIRALKVGDEVTAVVVVTESDAGQVVLSLRRAAADSKWKLVEEAMGDGRILSGKVKEATKGGLLVEIEGVIGFVPSSQVSAKY------------DGG-AGLLGQQIQVKVIEVDREQNRLVLSEKIVGEAEEMEERRKILELVQVGGEYEGVVVGIVPFGAFVEIELKDKGGKGEGVVRLEGLVHISEISWEKVEDLAKFLKEG…
>CPR_MG_Amesbacteria_GCA_001773775.1
----------MA---------------------------------------------------------------TKKVSVK------TDK-V------------------KG-S-PS----TM----------E-ELLAVTGYKL--HGFKRGEKVKGKVAEVTNKTVYVDI-GGKSEAVVSEQEVELA--RDYFKNLKPGDEVEGMVLVSENDAGQVVLSLRRAAVDNRWSGLEQAMADETELTVKVREVTKGGLLVDLDGVYGFIPSSQVGREL------------EGDLSEAAGKTLRVKAIEVDRVQNRLVLSEKAVSEAEEIAKRKQALGAVKMGGEYEAIVVGIVPFGVFAELVISPKSVKPEEEIKLEGLIHISELSWEKIDEVNKVVKVG…
>CPR_MG_Amesbacteria_GCA_001001005.1
----------MK---------------------------------------------------------------QQSSDIK------TQS-K------------------NG-T-PS----TM----------E-ELLAATRYTL--KGFKRGETITGKVVEITGRTIYVDI-GGKAEAVVADQEYELA--KDYFRALKPGDEVTGVVLITENDAGQVILSLRRAAADSRWKAFEQAMAEDETINVKGKESTKGGLLVDADGIFGFIPASQLSRDY------------EGNVNELVGKDIQVKVIEVDRSQNRLVLSEKAVSEADEIEKRKKAMEAVIIGGEYDGRVVGMVPFGIFVEIDLQSKTSKKEEEIKLEGLVHISEISWEKVDDVNQIIKEG…
>CPR_MG_Amesbacteria_GCA_001002325.1
----------M----------------------------------------------LK----------------RQSIQAT------KLQ-S------------------KQ-D-PQ----TM----------E-ELLALTGYKP--KGFKRGETVKGKVAEVTGKTVYVDI-NGKAEAVVAEQEFELA--KDYFRALKPGDEVTGVVLISENEAGQVILSLRRAAVESKWKTFEQALADDQVILVRGKEATRGGILVDADGIYGFIPTSQVGREL------------EGSSGSLAGKSIAVKVLEVDKLQNRLVLSERAVSEAEEIEKRRLALSKVTIGGEYDGRVVGMVPFGVFVEIETKS--TKKDEEMKLEGLVHISELSWEKVEDVNKAVKEG…
>CPR_MG_Woesebacteria_GCA_016700095.1
----------MALGAMD----------------------------------YTLAGQTK----------------TSKTKSV------NSA-K------------------SG-G-SL----TM----------D-DLLKSFSDKV--HGYKRGDRVEGIVTGISSKQVTVDI-GGKSEAMVAEKAYIEA--KDFIRKLKVGDKVTANVIIPETYDGVTILSFRHTAQNASWNLLESAMKNDTPINVTGRNVNQSGVMVDIEGLTGFVPISQLGREA------------AKNPQGLINAQFKVLPIDIDREMNKIVLSEKAVSDAEEIKQIRKAIETIKIGEIYDGTVSAITNFGCFVTIQKELK----KEVISVDGLVHISELSWDKVSSASEIVDEG…
>CPR_MG_Woesebacteria_GCA_013426185.1
----------MSFK-------------------------------------------------------------IKVPEKK------EKT-K------------------SS-K-EL----TM----------A-DLLAS-KKVF--FGLKVGQKVKGKVVEKSPKALLLDI-GGKSLGMVTGKALSEA--KDFARQLEVGDEVEGSVLIPETPDGYTIISLRDSAKTFVWNKIEKIYREAKELSLEVKNSGQSGVTVEILGLTGFVPMSHLTKET------------LKDVNNLSGKMLRLKIIDFDKSSNRLILSEKAVVEAKEIEDQKEALASLKEGEVYEGEVTTVTDFGAFVKLPAKLK----GKKVEVEGLVHVSEVAWGKSMKPSEVLKEG…
>CPR_MG_Woesebacteria_GCA_013374855.1
----------M--------------------------------------------------------------------TEK------SKK-E------------------AK-K-NL----TM----------E-DVLASLGGRL--QPLKKGQVVKGKVVEKNSNSLVLDI-GGKSLGLVAEKAFIEA--KDFVRHLEVGDEVEGKVLIPETPDGYTIISLRDTAKDFIWKKIEKAFENQEEITALVKSVSSSGVLVLVFGLTGFVPKSHLTEKN------------DSNINSLSGKKLILKIIDIDKDTNRIILSERAIYEKEEMEAKKKAIKNLNEGEIYNGVVSGIYDFGVFVRIPVSVG----KKEIEVEGLVRVSEISWEKFKKIEDVVKEG…
>CPR_MG_Woesebacteria_GCA_013374835.1
----------M-----------------------------------------------------------------------------AKK-Q------------------NN-K-KI----TM----------E-ELLARSPIVV--QSFEAGQEVKAKILSLEQGVITLDI-GAKSDALVIGSHYDEV--KSFVKKLKVGDVVNAVVVEPESRDGNVLLSIKDQAFDSLWNKLEKAKNKGAEIKVVGKNVTEKGVVVEVESLIGFIPASQLGKEA------------AKEVDKLLDQEFPAKIIEVDRDKNRIVLSERAVSEREELELEEKALKNLKEGEILKGRVKELTSFGAFVELRVEIG----KKPVPIEGLVHISELSWEKISDPSKIVSVG…
>CPR_MG_Woesebacteria_GCA_001793085.1
----------MV---------------------------------------------------------------SNKKEDD------KQV-T------------------SN-K-NI----TM----------A-DLLKRSGKKI--KSFTIGEKVMAKVVELGRSVALFDI-GGKAEGILKDSFYEES--KKFVSTLKPGDEVLVTVVIPETNDGQIVVSLRDTAANDAWQKLDQAKKTNTKITVTVKGITDSGLTAETESITGFIPMSQVGKKV------------LGDLDSFVGKRLDVKVVEVDQNKNRLVLSERQVSEADDIKKMDSILEKITHEDVFEGEVVTLTKFGAFVEIKVKSG----KSVVPVEGLVHISEISWEKTRDPKEVLDVG…
>CPR_MG_Woesebacteria_GCA_001792075.1
----------MFTPFYGVP---PNTEVKQTSAEDS--------------GATHRENRSR------------PGDLRAKERRK------DLV-T------------------PK-K-SI----TM----------A-DLLAKSTQKI--KSFSIGEKVRAKVIEVGGNYALFDI-GGKTEGVLKDSFFEES--KKFVGSIKEGDAITVTVVIPENSDGQTVVSLRDTAANDAWDKLNQAKADAKKISVVVRGVSESGITAETNSITGFIPMSQISKKL------------LSQLDSLVGKRLEVLIVEVDQRKNRLVISERGVSEADEIKKIDEVLEKISNGDVYDGKVITLTKFGAFVEITA--------LGVSMEGLVHVSEISWEKTRDPKDVLAVG…
>CPR_MG_Woesebacteria_GCA_001000385.1
----------M----------------------------------------------------------------------T------TKT-T------------------ST-K-VV----TM----------A-ELLARAKNKV--QTFTKGQRVVAKVLSKTDSVILFDI-GGKSEGIVKEKGYTDA--KEFIEGIKVGDDVMVTILVPETREGTTILGLKDAMKDISWEKLEACKKSGEAVPVFGKGVSTPGFVVDVMGIEGFIPTSQLGKEI------------TGNPQNLVGKYFKARVMEVDKMNKKVVLSEKEVSEAGNIALVKEALKKIKEGEVYEGVVTTVAPFGAFVKIEVPVK----KQKAEVEGLVHVSELSFSRVNLPSDVIHEG…
>CPR_MG_Woesebacteria_GCA_001793185.1
----------MAT---------------------------------------------------------------------------KKT-S------------------SK-K-AS----TM----------E-ELLMRAGGSF--KTFSPGEKVSAKLLKITKKTATFDI-GGKSEAVVVGDYFDEA--REFLSTLKEGDDVDVEIISTEPTNDGLLVSLGKSAFDAVWEKLESARGEKKQLTVTVKSGSSAGLVVEYDGVSGFIPKSQLGSDI------------AKDTDKLVGTRIKVKPVEVGKRDNKLVFSEREVSEADEINLVRQAMETIDKDEVFEGTVMKVTNFGAFVEISVKVG----KKEIPVEGLVHVSELSWEKTADPADEVKVG…
>CPR_MG_Woesebacteria_GCA_001793475.1
----------M-----------------------------------------------------------------LATKSA------TKS-S------------------SK-N-PS----TM----------E-ELLALYGSKI--KSFKKGEIIDTKLTSVQKRKAFFDV-GGKSEGVVTDEEFDTA--RAYIRSLKVGDTIQAEIVEPEAKDGLVHLSLARFAEEAVWLELEKALKNDTEVTVYGRAVTEKGIIIEYNSLSGFVPLTQLGKEV------------LKDTQSLIDKPFKVKPLEIDRAKERIVFSERAVSEGEEIKLQKQALDSFKPGDKYKGKVTQLTSFGAFIELKADLK----GKKIPVEGLVHISELSWDKVGKPQEVLEEG…
>CPR_MG_Woesebacteria_GCA_000999115.1
----------MKTIAVAGW---PNSEVKRSSGDDSCPA-----------RLFLMAVRKS----------------VTKNKAV------KPR-A------------------SR-G-KV----TM----------A-ELLLRSPLEI--HGFKRGQKVKAKLIGLEKSQADFNI-GGKTEGVIRGIYYTET--RGFLKTLKKSETVELVVIDPETFDGHVLLSARHAARAQFWSRLTDLKKTGGTLTVCGISVNDRGVSVEVDSMSAFVPVSQLGKVA------------SRDPEKLVGQTFLVKVLEVDPEKQRLVLSERAVSEASEIKRTQKAIKSVKEGDVFKGVVTTVTSFGVFVEIKV--------NKVPVEGLVHVSELSWAKVSDPREFLREG…
>CPR_MG_Woesebacteria_GCA_001793235.1
----------MT----------------------------------------------------------------------------KTQ-N------------------DS-K-SV----SM----------E-DLLASTGYKI--KSFTKGQKINAKFLRMSARTAVFDI-GGKSEGLVREGNFLEA--KNLIENLKAGDEIAAMVMEPESRDGATLLSLRGAAQDDFWKKIKKAQEEGKVIEVIVKSVNPHGLVAALENETAFIPNSQLGAVL------------TKMGEGAVGKHVKTKIIDLDEGNLRIVLSEKAVSEADSLKDVDKALKSISVGDKFKGVVTTVTNFGAFVQITVPMD----DKKVEVEGLVHVSELSWAKTARAEDVIAVG…
>CPR_MG_Woesebacteria_GCA_001792005.1
----------MCV---------------------------------------TTKKKTS----------------SFKTHKT------SNS-S------------------SQ-E-PK----TM----------A-DLLQSFGREV--KPLSRGVKLKGIVISKSKNRLVLDI-DRKSEGLVAEKAFSEA--KDYIKTLEIGDVVTTSVIISETPDGYTILSLRGAQQDASWEKIIKAKSEDKVMVVLGKSVNPSGVMVEAEGLIGFIPNSQLGKEV------------SEDTKTLIGEHFKVKVIDVNREANKIVFSEKEVSEEEDIKLIKKALQKIEVNKIYEGRVSTITNFGCFVKIDISFN----KKKIPVEGLVHISELSWQKVENINNLLKEG…
>CPR_MG_Woesebacteria_GCA_001793025.1
----------MEAK-------------------------------------SSLKSKKT----------------SKTSKKS------SGK-S------------------SR-G-VS----TM----------S-ELLEQYG-SA--RGLSIGDMIEGVILEITSKRVVFDI-GGKSEGMVAEKAFKEA--ENFIKTLKVGDKLQAKVLVPETQEGFTILSLRQASSDASWKKLEKLKNDAIPVKCFIRVVNPSGLIVDFDGFSGFIPKSQLGKEI------------LKETQNLVGTKIEAVVIDLDRKSNKIILSEKEVSEKEQLEFVKKALKVIKEGDIFVGEVTSVYDFGCFVKICVPLS----KKKVFLEGLVHISELSWDKIDRPSNLVSQG…
>CPR_MG_Woesebacteria_GCA_001792375.1
----------M------------------------------------------TLQKSS----------------SVSKNKS------PKQ-K------------------SG-E-AQ----TM----------E-ELLALYGSGG--SSLKRGDKVKGKIIAKESKRLVLDI-GAKGEGIVAEKAYQES--KDYIKELKVGDEVTASVIVGETPDGYTILSLRNAMADSAWKKLEEAREAKKPVAVLGNSHSTSGLTVEVEGLYGFVPTTQLGKEA------------SKNPQSLVGKHFKVLVIDLNRSENKIILSEKEVSEAEDLKEVRFAYEKIKEGEIYEGKVTTVSNFGCFIEIEVAID----KKKAKVEGLVHISEISWSKITSVADNVTEG…
>CPR_MG_Woesebacteria_GCA_001793075.1
----------MESGWLCQ------VAKQKKVSKVA--------------VYKLSPRKAQ----------------AQRGKQD------RNK-K------------------TS-E-PS----SM----------D-ELLSLYGVPK--FSFSVGDMIKGKIIRIEPQRVVIDI-GGKSEGLVAEKAFKEA--EEFVKTLKIGDEIEARVLVTETRDGNTILSLRHAREEASWKRIQEIEEKQTPILVEGKGVTSSGMTVDIEGMTGFIPASQLGKEV------------SENPQKLIGQRFEAVVIDFDRAVKKIILSEKEVSEKEELARSREAIKNIKEGAVYEGEVTTIFDFGVFVKIEWGSG----KTKIPLEGLVHISELSWEKVSSPDDVVSQG…
>CPR_MG_Woesebacteria_GCA_001793105.1
----------M------------------------------------------------------------------AAKGS------TKK-S------------------SK-E-PQ----TM----------E-ELLSMYGGTD--FSHSVGDKVKGKIISIDSARVVVDI-GGKSEGMVAEKAFKEA--EDFIKTLKVGDEIEATVLVSETRDGFTILSFRRAAGDALWENIELVSENATPITVEGKGVTNSGVTVDVHGLTGFIPTSQLGHDA------------AQNPQSLIGKKFQAVIIDYDRDARKVILSEKEVSEKDELARARLAMKNVKEGEIFDGVVTTVYDFGCFVKIEVPVS-KKNKEKVPLEGLVHVSELAWEKIADPNDVVKEG…
>CPR_MG_Woesebacteria_GCA_001793015.1
----------M---------------------------------------------DSK----------------SQSKASK------SKP-S------------------KR-E-AQ----TM----------G-ELLSMYGGSG--FSHSVGDRVRGKILSIDGAKVVIDI-GGKSEGMVAEKAFKEA--EEFIKTLKIGDEIETTVLVPETNEGFTILSLRVASENSLWGKIQDASEKATPITVEGLGVTSSGVTVNLNGLTGFIPMSQLGKVT------------SQNPQALIGKKFQAVVIDYSRNIRKMVLSEKEVTEAGEIAQGRTALKEIKEGQEFEGEVTTIYDFGAFVRIWTPLK-GKVKANIPLEGLVHVSELSWEKISDPGSVVSVG…
>CPR_MG_Woesebacteria_GCA_001792035.1
----------MN----------------------------------------------------------------------------SKT-S------------------NK-E-PS----SM----------A-ELLARQKDTK--KRFSLGQRIEGTVIEKTPKSLILDI-GGKSEGLVAERAFNET--KNFIRYVNVGDKLVGKVIVSENPEGYTVLSLREASKDYLWKKLQRLESEGEEIVVTARNVNPSGVVVEIFGLNGFIPASHLGKAI------------SKNLAKLTGETLKVKIIELDKSSDRVVLSERAVSESEIIEKQKEAFKVVREGDIYQGEITTVADFGVFVKIEIPQK----KEKVELEGLVHISELSWEKVGKPMDIFSVG…
>CPR_MG_Woesebacteria_GCA_001792115.1
----------MT----------------------------------------------------------------------------SKG-S------------------SK-E-PT----TM----------E-ALLASYEGKI--HGFSKGQRLTATVIAKTPKALVLDI-GGKSEGIVTEKAFVEA--RDYIKILKIGDKVNCAVLIPENSEGYVILSLREATQGATWDRLRNAKEKETPLSVVGRGSGPSGVTVEVEGLIGFIPFSQLGKEA------------MDNPQFLIGKSFRAKVIELEKSSNKVVLSEKAVSEAGEMKLAKEALSKVKEGEIYDGIVTTVANFGCFVRIDIKEG----KGTIPVEGLVHISELSWSKVENVGDVVSEG…
>CPR_MG_Woesebacteria_GCA_001791995.1
----------M--------------------------------------------------------------------SKT------TKT-N------------------SS-E-PK----TM----------A-ELLAMAQNKV--KAFSAGQRVRGKILAKGPASLILDV-GGKAEGVVAEKAFTEA--RDLIKNLKIGDEVTATVLIPETRDGTVLLSLRQAAFDASWERLEQAQRDGTPVAVFGKGVNPSGVTVDVEGVLGFIPGSQLGKEA------------NKDTNGLVGKYFKAVVLDVDKLANKVVLSEKAVSEAEDIKKAKEAIKKIKEGSLYDGVVTTVAGFGCFVKLDL--G----KDSPLVEGLVHISELAWGKVIQVSDIVSVG…
>CPR_MG_Woesebacteria_GCA_001793695.1
----------MV----------------------------------------------------------------------------STK-K------------------TS-K-DP----TM----------A-ELLASAKGKV--VGFSSGQKVKGKVLAKDRKSLILDI-GGKSEGQVSEKAFAEV--RDFVKGLKVGDEVWATVLVPETKDGVVLLSLRGAAQDASWGKLTRIQKTKESIYVLGRGVNPSGVTVEVEGLLGFIPQSQLGKVA------------SKNPQELIGKYFKAQIIEVGKAANKVVLSEKEVSEASDIRLEKEASEKVKEGEIYDGVITTVANFGCFVKIGVEVD----KKKVFVEGLVHISELSWSKVKNPSDIYSEG…
>CPR_MG_Woesebacteria_GCA_001792915.1
----------M-----------------------------------------------------------------------------VPK-S------------------SA-E-PK----TM----------A-ELLASASSKV--RGLSSGQKINGVVSAKTPRSLILDI-GGKSEGMVAEKAFIEA--RDFIKTLKIGDTVTATVLIPENRDGVALLSLRQAAFDSSWERLEKAKQGEVAVAVFGKGVNPSGVTVDVDGLTGFIPGSQLGKET------------SKNPQNLVGKYFKAVPLEVERLANKVVLSEKEVSDAADIKVAKEALEKIKEGDIFEGVVTTVANFGCFVKLDIP-------GKISIEGLVHISELAWGKIGVTSDAVSEG…
>CPR_MG_Woesebacteria_GCA_001793315.1
----------M---------------------------------------------------------------------KT------TNT-S------------------KT-S-SV----TM----------A-DLLAKSKTSI--KNLSMGQRIKGKVIQKLSKSLILDI-SGKAEGVVMEKAFAEA--REYISKLKVGDEVTAVVLVPEMRDGSTLLSLRDAVSAASWQGVEDAYKNKTDVAVYAKGVTGSGVSVDVNGISGFVPMSQISKEL------------SKDTSNLVGKYFKARVIEVDRLKNKLVLSEREVTDAKDIAIAKKALEKVKEGEIFEGVVTTIANFGCFVKITV--------ENSEIEGLVHISELSWGKVAHPSSLFKVG…
>CPR_MG_Woesebacteria_GCA_000994415.1
----------MI----------------------------------------------------------------------------TKK-T------------------SK-E-PT----SM----------A-ELLARAGKKV--QTFTQGQRVESKILAKTDKSLILDI-GGKSEGIVTEKGYTDA--KEFIETLKVGDSVLATVLVPETRDGTTILALKDAIKDIAWEKLAEAKKKGEDVPVLGKELGVSGLTVDISGIEGFIPMSQIGKIA------------LSDAQSFTGKYFKAKVMEIDKTSNKIVLSEKEVSEAGDIKLAKEALKKIKEGEIYDGIVTTVAPFGAFVKIKI--------GKASLEGLVHVSELSFTKVNFPGDVVSEG…
>CPR_MG_Woesebacteria_GCA_001001755.1
----------M---------------------------------------------------------------------LS------TKT-S------------------SV-K-SV----TM----------A-DLLARAKGKV--QQFSKGQRVSARILSKTPEAVIFDI-GGKSEGIVKEKAYTDA--KEFIETLKVGDVVLVTVLVPETRDGITILALKDAMRDIAWEDIVKAKEAGTPVPVLGKGVGVSGFVVDVMGIEGFIPTSQLGKEV------------SAQGQNLVGKYFKAKVMEVDKMNKKIVLSEKEVSEAGDIALAKKALAGIKEGEIYDGVVTTVAPFGAFVKIEIPVK----KERAHIEGLVHVSEISWGKVGLPSDVLSEG…
>CPR_MG_Woesebacteria_GCA_000994565.1
----------MTSK-------------------------------------------------------------TKSKTSI------TGT-T------------------SS-T-GI----TM----------A-ELLAGAKNKV--QQFTKGQRVKATILSKSPESVIFDV-GGKSEGIVKEKGYTDT--KEYIEGLKVGDSVLVTILVPETRDGITILGLKDAMHDVSWEKLEQMKKDGVEVPVLGKGVGTAGFVVDVMGIEGFIPTSQMGSDV------------SKNAQDLVGKYFKAKVMEINKASKKVVLSEKEVSEAGDIALAKKAMEAVKEGEVYEGVVTTVAAFGAFVKIEVPVK----KEKAYIEGLVHVSELSYSKVNLPSDVVKEG…
>CPR_MG_Woesebacteria_GCA_000996165.1
----------M--------------------------------------------------------------------VTT------TKT-T------------------SN-S-AT----TM----------A-ELLARAKNKI--QKFTKGQRVEAEVLSKTESNVIFDV-GGKSEGIVKEKGYTDA--KELIESLKVGDKVAVTILVPETRDGITILGLKDAMKDTSWIKLEKAKQSGEPVPVLGKGVSAPGFVVDVLGIEGFIPTSQLGKEV------------AKNPQDLVDKYFKAKVIEVDKMNNKVVLSEKEISEAGDIALTREALKKIKEGEIYDGVVTTVATFGAFVKIEVPIK----KEKAQVEGLVHVSELSYSRVNLPSDIVKVG…
>CPR_MG_Blackburnbacteria_GCA_001816895.1
----------MLSRN-------------------------------------------------------------------------SSKLN-----------------QLS-S-DG----VM----------G-QLLAQQQTKL--QILTSGQVLDGRVLEIRNKVLILDV-GAKSEGLVADREFENA--ASFISTLKTGDMVQAVVVVPETSSGQPLLSVGKAAAESGWKRLEQAFRDKAEVDVRVEGSSRGGLSVVFDGIYGFVPTSQTGSEI------------AKNPQVYTGKTIKVKVSEVNKAEERAVFSERAISEAGLVARQEEALKGIKEGEKFSGRVVGIVNFGVFVQILK--------NGVQLDGLVHLSEISWGKTPDPTKALSIG…
>CPR_MG_Blackburnbacteria_GCA_001816475.1
----------MSK-----------------------------------------------------------GSKIPKLTQL------TQD-N------------------TS-S-SD----LM----------G-QLLVKTGQFR--GGVVVGQKVEGKVVEVTGRMVILDI-GSKAEGLVVEDQFDEA--RDFIKTLSAGDKVTATVVVSETMHGQALLSLRDTAQETGWVELENAFKENAQVEFKVLGFSRGGLSVVTRGVEGFVPISQMSASI------------AKNIANSVGKTYKGKIVESDRASNKLVLSERAVSESEMIKEQIDALKLIESGEKLKGKVVGIANFGAFVQIKIPGKN---GKDVTLDGLVHLSELSWQKVVDPAKIVKEG…
>CPR_MG_Blackburnbacteria_GCA_001816385.1
----------M-------------------------------------------------------------------AAKT------SKI-S------------------PK-H-AS----TM----------E-ELLAKTGYAP--RGLRRGQEVTGTVISISSKSLVLDI-GAKSEGLVIESEFDMA--KPFIKTLSAGDEIQATVITPEGEGGHVLLSLRQSAQDFVWKTLEEKRESGEEVEVKVEGATRGGLTTSLYGIGGFAPTSHLSGDL------------ADNPQSAVGRNLQVKIIEVDREKQRLVMSEKAVSQKEFLAKQKEVLGGIKPGEKFVGRVTKVINFGVFVEIVK--------DGTPVEGLVHLSEIAWNKIINPSEVLAEG…
>CPR_MG_Blackburnbacteria_GCA_001816455.1
----------MAA---------------------------------------KATKNAK----------------SEPLNGK------TSK-S------------------PK-P-AS----SM----------E-ELLAVSGHNP--KGLLRGGKIEGIVVEVAPRALVLDV-GAKAEGLVRDVEFEVA--KTYIRTLKPGDKIQATVVVPEGEGGYVLLSLRETAENFIWDWLVEKQKSGEEVEARVESATRGGLSVNVGGVLGFVPTSHLGSGV------------LDNPSASTGKNILVKVIEADRAKSRLMVSEKAVSEKEFLHQQSQVLAKIRSGEKFVGRVTKVINFGIFVEITK--------DETPVEGLVHVSEISWQKTGNPAEVFSEG…
>CPR_MG_Beckwithbacteria_GCA_001803445.1
----------MKKR-----------------------------------KSKKVKKQTKK---------------SSPKASA------KRS-S------------------EK-Q-PK----NM----------E-ELLKQTKYQL--HGWKRGDVIDGIVVEKTKGILYIDI-GGKSEGMVIDREMKAA--RDFIKELVVGSQVEAVVTQPENDKGQTLLSLKKAAADYLWGQFEERMKTGETIRVTGREVNKGGLVVEAKSLQGFIPASQFGSKW------------EEKIERLIGRQIEVKPIEVDRGKNRLIFSEREVSEAALLKAQEEELRKIKIGDIFPGKVTGVMPFGFFVKIKP--------DKIELEGLVHISEISWQRVEDPGEFYKVG…
>CPR_MG_Beckwithbacteria_GCA_001776045.1
M----KLLKKMASKKATSK---AASVKKVSPKK-----------------AKESKTQAK----------------AVKKAVS------QKA-T------------------VT-T-AS----SM----------E-ELLQQTNYIL--HTFKKGKTVKGIITDRARKSVFFDI-GAKTEGVITGRELEYV--QDYLDQLNIGDTLDVRIVSPENEKGQILLSLREAANDWKWNLLEANYKSGDAVEVRGLEVNKGGMIARIMGIRGFIPTSQFGRKW------------TGKLDTLYNKLFPVKIIEVDREKNRLIFSEKAISEEEILKSQEEAAKLVKVNEIYEGEISGVMPFGLFVRVPVEAGAAKADEPIFLDGLVHISQVSWGKVDDLKKQFRVG…
>CPR_MG_Beckwithbacteria_GCA_001029675.1
----------M----------------------------------------------------------------AKKTIKA------VKK-S------------------GK-E-PQ----TM----------D-ELLKATGYKL--KGLKKGQLVEGVVTDVTRGAILIDI-GAKTEGVVVDKELEVA--RELMEHLSVGDTVQAYVGSPENERGQILLSLRQAVMDKRWELFERLLKTGEAVAVRGLEVNKGGIIVRSRGVRGFVPSSQFGRKY------------LGKLDELKNEKFEVKVIEVDREKNRLIFSEKAVSEQEALAKQNEALKLVSPGDELSGVVSGIMPFGVFVRANVPLKKKQADKELFLEGLVHISEISWEKVENPGNYFKTG…
>CPR_MG_Collierbacteria_GCA_001003385.1
----------MLEST----------------------------------RRMIFMAKTK-----------------TTTTKK------ETS-P------------------KA-E-PK----TM----------K-DLLESSGYEL--SIPKKGETITGLVTGITRKAVLVDI-GAKTEGLVAEKEYAIA--KDFVDSLKVGDEIEVYVMSEENEKGQIMLSLRRAMFDKLWGMLEGYLENDKEVQVKGVEVNRGGMIVKWQGLRGFVPSSQFGAQL------------AGNFQDLMNKNFAVKAIEVDREKNRLIFSEKHVSEAAIMEKREKALKVVAKGEVFKGKVTGVLSFGAFVAVEVPVE----KTKITVEGLVHISEISWEKVEDIHRYLKVG…
>CPR_MG_Collierbacteria_GCA_001002205.1
----------M-----------DRLAKVTKKVKVV--------------KVPKAPKKEK----------------TVKKEVK------ITK-A------------------VK-E-PV----TM----------E-ELLSSAGYKL--SVPKKGETITGLVTMVNRKMVLVDI-GAKTEGLVAEKEYEYA--REFIETLKVGDEIDVYIASDENERGQILLSLRRAMMTKLWDMLEGYLKNETEVQVKTYELNRGGMIVKWQGLRGFIPSSQFGSSY------------AGNLQGLVGKMIAVKPIEVDREKNRLIFSEKHVSEAMQMVQRENALKAVKVGDTLEGKVTGVLNFGAFVAVTV--------SGVIVEGLVHISEISWEKVEDIHKYLKVG…
>CPR_MG_Collierbacteria_GCA_001002845.1
M------L--M----------------------------------------------------------------DFFNMTK------VKV-T------------------VK-E-AT----TM----------E-ELLATSGYQL--SVPKKGETIKGLVTTVNRKMVLVDI-GAKTEGIVSEREYDFA--KEFIETIKVGDEIDVYVASDENERGQILLSLKRAMFDKLWSMLEDYLKNETEVQVKTVELNRGGMIV------------------------------------------------------RWIFSEKHVSEAGAMVQRESALKEVKVGNTFSGVVTGVLSFGAFVAVPVVAG----KETITVEGLVHISEISWEKVEDIHKYLKVG…
>CPR_MG_Collierbacteria_GCA_009936135.1
----------MA----------SSALKKGKKEV--------------------VKKNSK----------------KITKKEK------VVS-K------------------SK-G-FK----SM----------D-ELLAKTGYQL--NVPKRGDVIKGMVTEVRKRLVLVDI-GAKTEGLVIDKEAEAA--AALIQTLSVGDEIEVFVKNPENDQGQILLSLRQAADDKRWELFSEWLETGKPIEIKGLETNKGGLIVLVDGMRGFVPASQFSQEY------------LGKMDKLIDKTFKAQVIEVDREQNRLIFSEKIVSEAGEIAKKGEALKKIKKGDVLEGVVSGIMPFGVFVTIKVEISDDKDEDQGKLEGLIHISEISWEKVDDPNKYYKVG…
>CPR_MG_Collierbacteria_GCA_001774615.1
----------MQAKAWAFV---NMATKKIKSKT--------------------EVKEVK-----------------APEKKV------KPG-S------------------SR-A-AT----SM----------E-QLLKQTGYHL--SAPRRGDVLKGLVTEVNKRMVLVDI-GAKTEGIVVDKEMEAA--SDLVSRLSVGDEIEVFVKHPENDQGQIVLSLRQAAEDSRWGSFTEWMETEKPIDVKGLEVNKGGLIVQVDTTRGFVPSSQFSQEF------------LGRMDELVGKVFRAKVIEVDREQNRLILSEKAVSEAEELAKKDEAIKSVTIGDDLEGVVSGIMPFGVFVTVSVPLSG--KETSGKVEGLIHISEISWEKVEDPNSFYSVG…
>CPR_MG_Collierbacteria_GCA_001774535.1
----------MG----------VKAKKAVPVVV---------------------EQEAP----------------KIVKEVK------KTP-A------------------AK-G-ES----LM----------D-KLMAQAGTTL--VTPKRGQQLEGTVSFVSKKMVLVDI-GAKTEGVVADAEAKEA--VDIIETLKVGDKISVFVKHPENDQGQILLSLRKAVEEGRWSVFKKWMDEDREVDVTGLEVNKGGMVVKIGEIRGFVPASQFGEKF------------LGNMDELLGKTFRVKVIEVDKAQNRLIFSEKLVSDAEGLAKKDEALADIVAGTKLVGTVSGIMPFGVFVTVNVPVKG--KGEVAKVEGLVHISEISWEKVDDPNTMFKVG…
>CPR_MG_Collierbacteria_GCA_000998275.1
----------MQ----------RRRRFVVQYVSRKDRK-----------FIKMSKAQTE----------------VITKQS-----------------------------------MS----VM----------D-KLMEGASAFP--GALKKGQKVEGVVSSIGKKMVLVDI-GAKTEGVVTGEDLVEA--YDVLADLKVGDRTEAYVKFPENDQGQIILSLKQAADENRWSRFKKLMEEEKEVEVTGVEVNKGGMVVKVGEIRGFVPTSQFGEKF------------LGNMEELLNKTFKVRVIEVDKDQNRLIFSEKMVSDSESLAKKGEALELVTVGDKLEGTVSGIMPFGVFVTVNVPMKD--KEEMARVEGLIHISEISWEKVEDPNEMFKVG…
>CPR_MG_Collierbacteria_GCA_000998025.1
----------MS-----------------------------------------NSQQSE----------------VINKKTG------GMA-T------------------TA-G-KS----VM----------D-KLMEGVGSFP--GALKRAQKVEGTVTAISKKMVLIDI-GAKTEGVVTGEDLAEA--YDVLKELKVGDKVSAYVKFPENDQGQIILTLKQAADENRWYKYKKIMEEEKEVDVTGLEVNKGGMVVKIGDIRGFVPTSQFGEKF------------LGNMESLLNKTFKVRVIEVDKDQNRLIFSEKLVSDFEALAKKGEALEMVTVGDKFEGTVSGIMPFGVFVTVNVPMKD--KEEVAKVEGLIHISEISWEKVEDPNVMFKVG…
>CPR_MG_Chisholmbacteria_GCA_001816575.1
----------MTS----------------------------------------DKLQVTR---------------NKKQKRI------KIK-K------------------SG-A-AE----TM----------E-ELLVKVGSGL--KVPQRGEKVKGVVTDISRRMVLVDI-GAKTEGLVVDKEYEAA--RDLIDSLQIGKLVEAYVISPENERGQILLSFKEAATSYSWDRFNQLLDTGEAVTVKGLEVNRGGVVVKTDSMRGFVPASQFGKVW------------LGKLEELVNRSFKVKVIEVDQDKNRLIFSERHVSEADQVAARSTALLGIKEGETREGTVSGVMPFGVFVTMQL--------KGTDIEGLVHISEMSWEKVDDPGNLVKQG…
>CPR_MG_Chisholmbacteria_GCA_001816955.1
M---------MAKKAKASK---KTAQKASLSSSGK--------------AETGAATQATLKK---------PVPVKPGKVTP------AKP-R------------------GK-E-PV----TM----------E-ELLAQTGYEL--HGVKRGELIEGTVTDISKRMVLVDI-GGKTEGLVVDKEYEAA--REFIRELAVGDAITVYVLSPENDRGQILLSLKKAASDRTWEKFEEAEKTGEIMTVRGLEVNQGGVIVHADSVQGFVPSSQFGRMW------------MGKMEELVGKSFQVQVIEVDREKNRLIFSEKQVSEAEELKKRAEALKQIQVGASYDGSVSGIVAFGMFVTVDVPIGKEKKQVVGKVEGLVHISEISWEKVDDTRNYFKVG…
>CPR_MG_Chisholmbacteria_GCA_001816915.1
----------MAKKTASKS---KLASKIRVKS-----------------AEKKTPKQVSVES---------GSKKTTKEPRI------ASP-R------------------GK-E-PT----TM----------E-ELLEQTGYEL--KGVKRGQLVEGTVTDVSKKMVLVDI-GGKTEGLVVDKEYENA--KDFISELSVGDTLTVYVLTPENDRGQILLSLKKAASDRTWQKFEEAHKTGEIMTVKGLEVNRGGVIVHADSVQGFVPSSQFGKQW------------LGKMEEIIDRSIQVRVIEVDREKNRLIFSEKQVSEADEIKQRGQALKKIKIGEVYSGIVSGVMPFGVFVTVDVPLENKKEKTIGKVEGLVHISEISWEKVDNPGQHFRVG…
>CPR_MG_Pacebacteria_GCA_001803415.1
M---TTLSKKMATKVIKKK---TNKAKVIAVTK-------------------KATKRTMV-------------VKKVKVPAV------PRG-K------------------EA-K-PT----TM----------E-ELLASTGYEL--KAPKPGETVKGVVTDVSKRMVLIDI-GAKTEGMVVDREYEAA--RDYAKELAVGDEVTAYVVSPENDRGQILLSLKRALVDKRWVQFAEYMETGEAVEVSGLEVNKGGMIVATDSIRGFVPSSQFGKEY------------LGRMDRLLSQKFRVKVIEVDKEKNRLIFSERHVSEAEAISKKAEALKFVKAKDKYDGVVSGIMPFGVFVGVEIPIK---KGDVGKVEGLVHISEISWEKVNDPNDYFKLG…
>CPR_MG_Pacebacteria_GCA_001803465.1
----------MARKSLELS---DSTEKKTKPSS--------------------SKSKT-----------------SKSPQKA------KTA-A------------------SA-K-PT----TM----------A-ELLAITGYEL--KAPKHGQVIEGVVTDISKKMVLLDI-GGKTEGMVVDKEYEVA--IDLIKGLTIGDTVKVFVVSPENDRGQILLSLRRASLDRKWEQLAEYLETGKVLEVEGAEVNRGGLVAQTEGIRGFVPSSQFSRQF------------LGKMDQLLGKKFKVKIIEVDKDKNRLIFSERHVSEADAMAQKASALKKVKAGDTYKGVVSGIMPFGVFVTVDVPLT---KDKLGKVEGLVHISEISWEKVDDPNRHFRVG…
>CPR_MG_Pacebacteria_GCA_001000345.1
----------MVQFLKRSR------------------------------QFTMPAKTTSA---------------KKVSAPV------APK-T------------------ST-Q-PL----TM----------E-DLLKQSQHEL--RVPQRGDVLEGIVTEITKKAVLVDI-GAKTEGVIAEKEYEMA--KDYISGLNLGDKVQVYVSSVENDRGQVILSLRKALANKKWEEFERAMAADEIVTVKGIELNRGGMIVGNEGLRGFVPTSQFGKEW------------IGKLESLLGTDLRVKVIEVQKDKNRLIFSERHVSEAQMIAKKAAVLDEIKVGEAYDGVVSGVMPFGAFVTVTVPIAG-EKEAKGTIEGLVHISEISWEKVEDPKRYMKQG…
>CPR_MG_Pacebacteria_GCA_001001445.1
----------MVQSPYSYE---KAKSPAESVSS----------------GAAKVAAKVVM-------------KVATKAASK------TMA-V------------------GS-T-PT----SM----------D-ELLALDGVSL--NVPKHGDVVEGIVTDVTKKMVLVDI-AGKTEGLIVDKEYEAA--QDFIATLHTGDKVSVYVVSAENDRGQILLSFKRAMMNQKWDQFEQAMKTEEVVIVRGMEMNKGGMIAGVDGVRGFIPTSQFGKQY------------IGKLESLIDTPIKVRVIEVDKEKNRLIFSERYVSEAQVIAQKGEVLTSIVEGEVYNGTVSGVMPFGVFVTVEVPIAGEDKKGLGNIEGLVHISEISWEKVENPNQLYKVG…
>CPR_MG_Pacebacteria_GCA_001873435.1
----------MLHGFQKKG---EKTEAVADKPA----E-----------IQEEKVEKTVE----------------VKEDKK------VEK-A------------------AT-K-PK----TM----------E-DLLADSKYKL--VVPQKGDSLKGLITAKSKKALVIDL-GAKTEGIVSEKEYDFA--SEFIKELNVGDEVSALVVSSENDRGQVVLSLRGAASDAKWEYFEEAFEKEEILDAKGVETNRGGLIVVVNGVRGFVPSSQFGRDF------------VGKVNNLKGEAFQVKVIEVDREKNRLIFSERHVSEAKELAQKDQALDKVKSGEIYEGVVSGVMHFGLFVTVEIPVDEGKASNIGYVEGLVHISEISWEKVNHPKDYHSVG…
>CPR_MG_Pacebacteria_GCA_001787405.1
----------MAKTVTSKV---KKTAVAKSKTS---AK-----------IQTEVSQKTP-----------------EKVSAK------PVS-A------------------DK-K-PK----TM----------E-ELLSQADYSL--VVPKKGGVLKGIITVKKKKSLIVDL-GAKTEGIVSDKEYDFA--SEFIKDLNEGDEISALVVSSENDRGQVVLSLRSAASDAKWEYFEQAQENDEILEAKGVEVNRGGLIVVVNGVRGFVPSSQFGREF------------IGKINQLAGETIEVKAIEVDREKNRLIFSERHVSEAKELSQKDEALKKVVDGEVYEGVVSGVMHFGLFVTVEVPVDDGNPENIGYVEGLIHISEISWEKVNHPKDYHNVG…
>CPR_others_Berkelbacteria_GCA_001872015.1
----------MQMQK-----------------------------------------------------------------------EKKIK-------------------ESR-A-TE----SM----------A-SLIEEAGDTL--LPYKEGEIVEAKVLSVSRNKIWVDV-QGLSLGYIPEKEITLN------SDVKVGDTILTYVILLEDEDGNVVLSLKRADRERYWKNMEERYKTGEPVEITINEANKGGLISEIGGIPGFLPVSQLSPEHYPRVAGGDRDEILSRLSKLIGEKLYVKVINCDKSSNKLIFSEKAVDAEK----LASKIEKYKAGDIVEGKISGIVDFGLFVKI-----------DPLVEGLVHISEVSWSRVSDLNKLFKVG…
>CPR_others_Berkelbacteria_GCA_001002835.1
----------MA--------------------------RRP-------------------------------KRKIKSLEKSSP--NKMSK-------------------TLT-S-PT----TM----------D-ALVELLGDKL--VPFTEGEVIDVTVVLTTKDHILVDV-AGLATGIIPEKELSAD-----AARFKAGDVIRAYVLSTENDNGYVILSLKKAEKEKLWSMLETRNSSGEAISVKVIQANKGGLVAQYGDMQGFIPVSQLSAKHYPRVN-GDRSQIQTKLAELIGQTVDVKIMSYDKPTNKIVFSEKAAGDAD----LEEKAQEFEVGQQVKGKVTGIVDFGLFVDI------------GGLEALVHISQVSWQRINNLRDHFTAG…
>CPR_others_Berkelbacteria_GCA_001774395.1
----------MS---------------------------------------------------------------------------SPTS-------------------TTK-T-PT----TM----------A-ELVELLGDKL--IPFTDGDVIDVIILSTSKDSIMVDV-AGLATGIIPEKEFSAE-----ATRLKAGDKVRAYVMTAENDKGYAILSLKRAEKEKLWNMLEARNTTGEIIAVKIVQANKGGLVAEYGNMQGFIPVSQLSAKHYPRVN-GDRAKIKEKLEELIGQSIEVKIMSYDRGSNKIVFSEKAVGDAD----QEEKAKQFTIGQHVKGKVTGIVDFGLFVDI------------GEMEALVHISQVSWQRVTNLKENFQVG…
>CPR_others_Berkelbacteria_GCA_001872655.1
----------MNTDPRHFL-------------------------------------------------------------------KEINN-------------------MTQ-S-PS----LM----------D-TLAQKSPDQL--APISIGKIIECSVISISKNKVIVDV-FGVALGMVPEREFSYD-----VDDLVPGDKVLAYVLMCENQDGYVILSLKRADRERVWTTLTDKQSTGEPIKVKVAAANRGGLLVEFGGVEGFIPISQLASDHMGGKQEEDT-RGGGGLRNLVGTTIRAKILTVDKPANKLILSQKAIGDER----LEELAKKVIVGTKLSGTVSGIVDFGIFVKVTIPG------ETQEMEGLVHISEVSWDRVDDLHSLYEVG…
>CPR_others_Berkelbacteria_GCA_001872695.1
--------------------------------------------------------------------------------MSDK--PKIMQ-------------------KIK-Q-FG----TM----------A-ELVDSMGDMI--VPFSGNSTCEVKIIQKTKSQILVDV-AAVAIGIIPEGEFSYD--V---EDLKVGDKVLVYILMLENEDGMMVLSLKRADKDRVWNLLQNKYESHEPIKVKISSVNRGGLLIEFGGIDGFIPVSQLAPAHYPKVEGGDANKILTRLKILVGATMTVKVLSIDQKTNKLIFSEKAYSNER----LITASEDLQPGQKLKATVTGIVDFGIFVKLDIQDV---SGRKDKIDGLIHISEISWNKDEDWKKKFQIG…
>CPR_others_Berkelbacteria_GCA_000991185.1
----------MA------------------------------------------------------------------------------T-------------------KTK-K-TV----SM----------D-ELVEKYGQDI--VPISVGDSVEVEVLTKSKNKITVDV-SGLASGVIPEKEFSYS-----CNDIKPGDIITASVLLAENENGFVILSLKQADNDRAWDILEEKKKNKENIQVKIKSANRGGLIAEYKDTEGFIPVSQLAPNNYPKVEGGNQSLILKKLQSFVGELMDVKVMSVDKNSEKLIFSEKIAVGSI----KDEDVKNLKLGKEVEALITSIVDFGLFVKINI--------EKKEYDGLIHYSEITWDKQVDWKKNYKEG…
>CPR_others_Berkelbacteria_GCA_001776145.1
----------MLAS----------------------------------------------------------VKIGGVASSKIEEPKKVNK-------------------KTN-S-VK----TM----------K-ELVEKYGQDL--IPFKVGSTVEALVVGTNRNRISVNV-NDFCVGIVPEKEFSAE-----GLEVKPGDKILASVIDLENVDGNLILSLKRADKERVWQNLKEKMNSGESVKVKVTEANRGGLLVQYGSVEGFLPLSKLPNNFYSQSARGDSAMMIQDLRKLINKVLDVKIINVDQQNNKLIFSEKDVSQAN----RKQMIKDFKVGQVVDGEVTGIVPFGLFVNI------------GEFEGLVHISEIAWERVGDLHKHYRTG…
>CPR_others_Berkelbacteria_GCA_001774375.1
----------M-------------------------------------------------------------------------------E---------------------K---PQ----TM----------A-DLADTYGNRL--IPIKNGDIIEVKVLEVARNKITVDV-AGFCIGIVPEREFSPD-----MSEVKVGEKILAYILTLENDDGNCILSLRRADKEKVAKILEEKFTTGGVITIKCNDANRGGLLCSFGDYEGFLPVSQLASSHYPKVSSGDKEEILNKLRDLVGQNFQVKILSFEPGAGKLIFSEKAAGDII----QQEKIKKYKVGDVLEGEITGVVDFGLFVNL------------GDIEGLVHISEVSWEHIENLRDLYKVG…
>CPR_others_Berkelbacteria_GCA_001029735.1
----------MK-------------------------------------------------------------------DSERK--KEGSD-------------------KIQ-E-IT----TM----------K-DLAESFSNRL--VPFKNGEIIEVKVQEILKSKIVVDV-AGFCVGIIPEREFSPD-----MSEVKVDEKILAYVLTLENSEGNCILSLRRADKEKVSKILDEKFTAGGVLTVKCSDANRGGLLCSFGDYEGFLPVSQLSSSHYPKVSSGDKEEILGKLRQFVGQNFQVKILSFEPANNKLIFSEKAAGDIV----QQEKIKKYKVGDELDGEITGIVDFGLFINL------------GEIEGLVHISEAAWEHVESLKDLFKVG…
>CPR_others_Berkelbacteria_GCA_000992805.1
----------M-----------------------------------------------------------------------------------------------------S-K-PQ----TM----------Q-DLVAAAGNRL--ISIKENELFEVKILQSLKNKILVDV-GGLSLGIIPEQEFSPD-----MGDLKVGDKILAYVLTVENDDGYVILSLRRADKERISKLLATKFETGDVLQVKASSANKGGLICQFGDFEGFLPVSQLTTSHYPKVNSGDRDEIYKKLHSLVGQNFRVKILNFEPGSGKLIFSEKAAGDLI----WQEKLTKIKIGQKLTGEITGIVNFGLFVKVILPD------VEEEMEGLIHISEVSWDHVEDLNNLFKIG…
>CPR_others_Berkelbacteria_GCA_000991925.1
----------MPTV------------------------------------------------------------------------RDKGK-------------------IMK-N-SQ----TM----------K-DLATTLGNRL--VPIHNGELTEVKILQILKNKIIVDV-GGLTLGIIPEQEFSPE-----VGDLKVGDKMLAYVLTIENDDGYVILSLRRADKERVSKILHTKFESGEVLPVKVLDANKGGLLCQFGDYEGFLPVSQLATSHYPKVASGNREEILSRLKSLVGQTLQVKVLSFEPGSGKLIFSEKAAGDIA----QFEKIKGIKIDDVLEGEITGIVDFGLFVKIKIG--------SDEVEGLVHISEASWEHVDDLKSQFKIG…
>CPR_Sa_Saccharibacteria_GCA_002952755.1
----------MT----------------------------P------------------------------KGVIISTNLTSTLIEEACRD-------------------MSK-T-SI----TM----------D-ELLQ--GDEV--KQLEAGDVIEGVVSSVKKHEVWIDL-GARGVGVVMRREISHG------QQLEVNQPVTVSVIDPELDEGHALLSMKRAAKDRGWDELKRMFDAQEIVEVMPYDANRGGLLVELESVRGFLPVSQLAAGHYPRVSGADKDEILQKLNALVGKPIRVRVLDVSRKDNKLIFSEKEAVKDD----MQARFAELKVGDVVEGVVTGVIDFGAFVNV------------QGIEGLIHISEISWERVEDPRDYVKVG…
>CPR_Sa_Saccharibacteria_GCA_010202115.1
----------M-----------------------------------------------------------------------------------------------------A-N-PL----TM----------D-DLLAQASDSV--KQLTAGEVVHGTILSIKKHEVLIDL-GPLGVGLVPRREVSMS------NNYAEGDEVTASVVEVELDNGYSLLSMRKAARDRGWDEVAAKLESGEIVTVTPYDANRGGLLAEYEGVRGFLPVSQLSAEHYPRVGSSDKDEILQRLNTLVNKEIRVRILDADRKANKLIFSEKEAIKEG----LAERFEKLSVGDTVKGIVTGVVDFGVFVNV------------EGIEGLIHISEISWERVNNPSDYVKVG…
>CPR_Sa_Saccharibacteria_GCA_016700315.1
----------M-----------------------------------------------------------------------------------------------------S-K-AV----TM----------D-DLLA--SSDI--KQLKSGDVVEGTVSSVLKHEVWIDL-GSYGSGMVVRRELGN-------QTLEPGQSLVVSVVDPEMDEGYALLSMRRAAKDRGWDELTRVQQAGETIEVQAYDANRGGLLIELEGIRGFLPVSQLSPDHYPRVSGADKDEILQKLNSLVKIPLSVRVLDVSKKENKLIFSEKEAIKDR----MQARFESLKVGDEVEGIVTGVIDFGAFVNV------------DGIEGLIHISEISWERVEDPRKYVKTG…
>CPR_Sa_Saccharibacteria_GCA_016699955.1
----------M---------------------------------------------------------------------------HRKKM-------------------PNN-S-TI----TM----------D-DLLA--GSEL--KQLETGDVVEGTISSVRKHQVWIDL-GPRGVGIVMRREVGHG------QSLEEGSPVTVSIIDPEMDEGYALLSMRRAAKDRGWDELQRVFEAGEIIEVQAYDANRGGLLVELEGIRGFLPVSQLAAGHYPRVSGADKDEILQKLNSLTAQPLRVRILDVSRKDNKLIFSEKEAVKDD----MQARFAELKVGDEVEGIVTGVIDFGAFMNV------------DGIEGLIHISEISWERVENPRDYVKVG…
>CPR_Sa_Saccharibacteria_GCA_016699895.1
----------M----------------------------------------------------------------------------KSRS-------------------IMA-H-KM----TM----------D-DLLN--GVSA--VDVTIGDVIDGKILSVKKNEVLVDL-GVRGVGLVPRREIGFG------KKYVVGDEVAAAIVDTELDSGYVLLSLRKAAKDRGWDEIQKVVESGKSIEVTPYDANRGGLLIEYEGVRGFMPVSQLSAEHYPRVT--DKDEILKRLRDLIGKPMSAQVIDVDQKANKLIFSEKEAIKDG----LVDRLTSLKVGDVVKGIVTGIVDFGAFVNV------------DGIEGLIHISEISWERIATVAERLKVG…
>CPR_Sa_Saccharibacteria_GCA_001790445.1
----------M-------------------------------------------------------------------------------S-------------------SMS-K-AV----TM----------D-ELLEA-NSDL--ERVKTGDITDGKISSVKKNEIWVDL-GPQGMGLVSKREMGYG------QKFNVGDEVSVSVIEAELDEGYSLLSLKRVSKDKGWDELEKVLADKAIVEVVPYDANRGGLLVESEGIRGFLPVSQLAAGHYPRVTGADKDEILTKLNALINKSIKVRILDLSRKENKLIFSEKEAVKDN----MQESFSKLNVGDIVSGEITGVIDFGAFVNV------------DGIEGLIHISEISWERVEDPKKHLKVG…
>CPR_Sa_Saccharibacteria_GCA_001788565.1
M---------MTFAKRNFG-------------------------------------------------------------------LLSLA-------------------ATK-A-NL----TM----------D-ELLA--SHDV--KQLRTGDMVEGMVTSVRKHEVWVDL-GPHGIGVIFRREVGH-------EELTEGGTISASVVDPELDEGYALLSLKRAAKDRGWGELSRLFEEQEIVEVSAYDANRGGLLIELEGIRGFLPVSQLAAEHYPRVSDADKDEILTKLNSLVGKTLKVRILDANRKENKLIFSEKEAVRDR----MQSKLTQLKVGDVVEGIVTGVIDFGAFVNV------------DGIEGLVHISEISWERVEDPRKYVQIG…
>CPR_Sa_Saccharibacteria_GCA_001790575.1
----------ME----------PII-------------NNP------------------------------KKKVVKKVKKTIETPPESTA-------------------SSS-N-AI----SM----------G-SLLKETDGKH--KDLQIGADIEGRVIQKGQSIIYLDL-SPFGTGVIYKSELQTT--QTDVKHIKVGDMLTAKIIGTENEDGFIELSIKDIGTKEAWSRLEQYYSDQETVDGKVTSAKKGGLMMLVEGIPGFLPASQLGQENYPRVEDGDENVILQKLKKLEGQLLKVKVLDLDPEDRKLILSEKAVEAKE----VKKALDVYKTGTIIKGIVSGVVDFGVFVKF-----------DDSLEGLVHISQLGWKLIEDPREFFSIG…
>CPR_Sa_Saccharibacteria_GCA_001790525.1
------MVGPLKTFKESFC-----------------------------------------------------RLIVVKTSSKSLTPTSPSA-------------------KRS-T-GL----TM----------D-DLLA---KSP--AQIKAGDMVEGTIMSVKKNEVWLDL-GANGIGVISRREVGG-------GDLNQGDTITTSVIEPDLEEGYSLLSMKKASKERGWGELERIFAEQEIVEVTAYSANRGGLLIEFEGIRGFLPVSQLSAENYPRVSDADKDEILNKLNSLVGKSLRVRILDVSRKDNKLIFSEKEAIRDD----VQARLTSLKVGDVVEGVVTGVIDFGAFVNV------------DGIEGLVHISEISWERVENPRKYVKIG…
>CPR_Sa_Saccharibacteria_GCA_001790365.1
--------------------------------------------------------------------------------------------------------------MAQ-A-AI----TM----------D-DLLAIGDQNV--KQLTVGEVITGTVLTLRKHEVLIDL-GPQGVGFVPRREVGFS------RALNEGDEVTASVVDTELDNGYSLLSLRKAAKDRGWEEVAVKLESGEVIEVAPYDANRGGLLVEYEGVRGFLPVSQLSAEHYPRVGSSDKDEILQRLNSLIGQNLKVRILDSDRKANKLIFSEKEAVKDG----LAARFQKLAIGDAVKGVVTGVVDFGVFVNV------------EGIEGLVHISEISWERVNNPSDYVKVG…
>CPR_others_CPR2_GCA_000995395.1
----------M-----------------------------P---------------------------------------------------------------------KTE-N-AL----TM----------A-DLMAE--AQV--KALAAGDIVEGEIISKTRNEVWVDI-PGFGTGVIAGRELQEN--SSIISDLKIGDKVMASIIEPEMEEGCALLSLRKAAKDRVWDRLEEKKSKEEKLMVKACDANKGGLLIEVDGVRGFLPVSQLAPEHYPRVSGGDKDEILIKLNSLVNRPLEVIILDVDKKENKLIFSEKIAQKEV----TKSILSNFEIGQIVKGKVTGVVDFGIFMNV------------AGVEGLVHISEISWDRVEDVRGHVKVG…
>CPR_others_CPR2_GCA_001872945.1
MGGF------M-----------------------------P---------------------------------------------------------------------KTD-N-EL----TM----------A-DLLAD--NNV--KTKQVGDIIEGQIISKTRKEVWIDL-GGSGTGVIAGRELHEN--FSIVSELKVGDFITVSIIEAEDDEGYALLSLRKAAKDRIWDRLESKKAKEEKLMVKAFDANKGGLLIEIEGVRGFLPVSQLAPEHYPRVSGGDKDEILIKLNSLVGKPLEVVVLDVDKKEGKLIFSEKAALKDM----TRNILSKFDVGQIVKGKITGVVDFGIFMNV------------AGVEGLVHISEISWDRVDDVRSHVKVG…
>CPR_others_Abawacabacteria_GCA_001773455.1
----------MN--------------------------------------------------------------------------NTSTK-------------------NKT-D-IV----PM----------D-DLVKNDTTSV--MIYEKGDVVEGPVVSISKHALVVDL-GTV-SGVVSGSEMMDS--VGTMKTVKVGDKVKVVVVGDENTDGQLQLSLRRASQENTWNRFVKDYQDGKIIEVTVMEANKGGLLIESDGIRGFVPVSQLTPEHYPRVSGADPEKILSKLQSLVGQKFKVKIINLNPEERRLILSEKAAYSDQ----RNKIIAKLKVGQTIEGTVSGVVHFGVFVNF------------EGVEGLVHISEIAWGHVSDPTQHARVG…
>CPR_Pe_Peregrinibacteria_GCA_001872565.1
---------------------------------------------------------------------------------------MMTK-------------------TTD-P-QN----PM----------Q-ELLKL-TPVF--KVPALGALIEGAIVEIVKNRIVVDL-GGNLTGVVAGKEIHDE--KKTALDLKIGDKIKAVVIMEENEDGLVVLSLRKAAQLNSWDNALKMFEESVTFQVKILEANKGGLLTEAGGLKAFIPVSQLSPVHYPRVEGGNLNRILGKLNAIVGKLLTVKVIGLDAENRKLVLSEKEALSEE----RDQTLSGLKVGQKVKGTISSIVSYGVFVAF------------NGLEGLVHISEIAWGHVSDPRQYAKIG…
>CPR_Pe_Peregrinibacteria_GCA_001873565.1
M---HTNEKFLS------------------------------------------------------------LNSLLRT-------------------------------DES-N-VI----SM----------E-DLLKD-SPEM--IFPIPGRLIDGTVISVSKSRIMLDI-GGVITGIITGREVKDS--QDTIKDIKVGDVIAAAVLENENEDGYAILSLRKASQEKSWKKFIDAYENDNVIEVKPNEANKGGLLLEIDGIKGFIPVSQLAPLHYPRVNGADSSMILQKLQKLVGQPFDCKVIGIDKENGKLILSEKAAQSDQ----RTASMQKLKPGQKVKGKISGVVKFGIFVAF------------DGLEGLVHISEIAWGHVSDPSDYGKVG…
>CPR_Pe_Peregrinibacteria_GCA_016699755.1
----------MSTL---------------------------------------------------------ILCAVFGVQQPLGEAPLIIS-------------------MKQ-E-DS----VM----------N-SLLQEF--TF--QMPKPGDVVSGVIVAKEPGYLLVSV-GGVAVGIIAGREMHDG--FGTTKKVQAGDEIQAFVLDEENEEGMMILSLRKASQMRNWDYFEKCLENGEIIEVVAKEANKGGLICDANGVHAFLPVSQLAPQNYPRVDGANAQAIIEKLRSFTGKKFSVRVITFLR-NDKIIVSEREAMSEI----RNKEIKNLKVGDAVSGVINGVVKFGVFITF------------GNLEGLIHTSELSWDAPRNHYEFFKIG…
>CPR_Pe_Peregrinibacteria_GCA_016699515.1
------------------------------------------------------------------------------------------K-------------------IID-P-TI----TM----------E-DLLNN-SKDF--QKPELGSVITGEVISLKKNRVVVDL-NGVAVGIISGTETSDS--AGTMKDLKVGDEVTAVVVEDENEDGMVVLSLRKASQATAWDRFEKAFKEGTIVEVTVNEANKGGLLLDVDGIKGFIPVSQLAPVHYPRVDGADANQILLRLKRLIGQKFHVKVINLDQEGNKMILSEKAALQSQ----STEALKKLEMGTRVSGTVSGVVKFGIFVTF------------DGLEGLVHISEIAWGHVSNPHQYAKVG…
>CPR_Pe_Peregrinibacteria_GCA_016699515.1_2
---------------------------------------------------------------------------------------------------------------------------M-------------LLQR-SES---QQ-RTGRRRD-------QR-VYSGI-GPRA--------------------L------------P-T--GR---SRRQPNFSKAWSKIPCK-------------SDQPG------------PGRQ------------------QD-D--------------------LIRKSRFTISINRST-------ETRNGNTWRGEIRYFRNL------R------------------------WTGRARSHFRNRLG…
>CPR_Pe_Peregrinibacteria_GCA_016699145.1
---------------------------------------------------------------------------MSATDGTEGRV--SDS-------------------TQT-V-VV----PM----------D-SLLND-SPAF--TLPEPGQIVEGKVAFISKKHIIVDL-GGVLTGLISGREMKDS--MGTTEELHIGDLVSACVLEAENEDGLVVLSLRRASQDKTWDKFVKAYEANQSLKVRPKEANKGGLLLEVDGIKGFIPVSQLAPLHYPRVNGADSAKILSRLQELIGQEFTVKIISIDKENGKLILSERAAFERE----RFDTLATLKAGSVVTGTVSGIVKFGIFVAF------------DGLEGLVHISEIAWGHVSDAHDFARLG…
>CPR_Pe_Peregrinibacteria_GCA_000993595.1
----------------------------------------------------------------------------------------RKL-------------------IAD-E-TN----IM----------S-EMLKT-FPLP--PPPKRGSLIEGVVVNVSKNKILIDI-DGIRTGVITGKEIHDS--LDTVKHLQVGDKVYVYIIEEENEDGLMVLSLRKAGQERMWQKFIDAYDNATTIDVKANEANKGGLLLDMDGIKGFIPVSQLAPMHYPRVDGADPGMILTRLQELVKIPLQVKIINLDKENGKLILSEKAAFEDQ----RQNALGKLNIGEKVKGTISGLVKFGIFVTF------------GGLEGLVHISEIAWGHVDNPGNYGRLG…
>CPR_Pe_Peregrinibacteria_GCA_001787455.1
----------------------------------------------------------------------------------------MAK-------------------VKT-A-SA----VM----------D-ALLQD-SPDI--KLPAPGALIEGTVIAVWKNKILVDL-DGVATGIISGQEACDS--SKTLKTVKEGDKISAYILEEENEEGLVVLSLRKASQQRTWDKFVCAHEQDESITVMPTEANKGGLLLNMDGIKGFIPVSQLAPLHYPRVNGADSSQILTRLQKLVGVPLLVKIINLDKEGGKLILSERAAEEEA----RQKSLEKLEVGQKIKGKISGIVNFGIFVTF------------EGLEGLVHISEIAWGHVKDPNEYGKLG…
>CPR_Pe_Peregrinibacteria_GCA_000999445.1
---------------------------------------------------------------------------------------------------------------------------------------------------------------------------------------------------------------------------------------MRRFLDAYENNEVITVKPNEANKGGLLLEVDGIKGFIPVSQLAPLHYPRVNGADANLIFDKLKKLISVPLSVKIINIDKENGKLILSERSAYQEE----RKNALKSLKVGSVVKGKISGVVKFGIFVAF------------DELEGLVHISEIAWGHVKDPSDYGKVG…
>CPR_Pe_Peregrinibacteria_GCA_000993615.1
----------MI-----------------------------------------------------------AILIMFYRVKSMIKI------------------------MAD-Q-TV----SM----------E-TLLKN-SPPM--IIPTPGEIIEGSIIDLSKNRILVDI-EGVNIGVISGREARDS--TETSKTLQIGDKVHVCVLESENEEGFVVLSLRKASQERAWKKFMEAYEKGETISVKPNEANKGGLLLEVDGIKGFIPVSQLAPMHYPRVNGADANLILEKLRKLISLNLSVKIINIDKDNGKLILSERAAFEKE----RRSALKTLKVNDVVDGKISGVVKFGIFVAF------------EGLEGLVHISEIAWGHVKNPLSFGRVG…
>CPR_Pe_Peregrinibacteria_GCA_000999315.1
M--------FM---------------------------------------------------------------------------------------------------ADT-K-VT----LM----------E-ELLMD-SPEI--IKLIPGKLVEGTIISLSKSRIMIDI-GGITTGIIAGKEVKDS--QETIKSIQVGDTISAAVLEPENEEGYVVLSLRKASQEKSWQRFLDAFENDKIIQVKPNEANKGGLLLEIDGIKGFIPVSQLAPLHYPRVNGADSSMILQKLQKLIGQNFDCKVIGIDKENGKLILSEKAAQSAQ----RSVAMSKLKIGQKVKGRISGVVKFGIFVAF------------DGLEGLVHISEIAWGHVSDPLDYGKVG…
>CPR_Pe_Peregrinibacteria_GCA_001788965.1
----------M--------------------------------------------------------------------LVQERFD------------------------TTT-T-TS----SM----------Q-ELLKD-SPPI--LRPHPGELIEGIVIFKGKNKMLVDL-SGVATGIISGRELRDS--LNTFRELNPGEPVVSLILEEENDEGMVVLSLRMASQQKAWERFHKLVADDKTMKFTAQEANKGGLLANIDGIRTFLPVSQLAPSNYPRVNNADSSEIINRLSKFIGHTFTIKIITLDEAAGKIVVSEREAMAEE----RSKALENLKPGDLKEGMVSGIVKFGIFVSF------------DGLEGLVHISEIAWGHVKNPSEFASIG…
>CPR_Pe_Peregrinibacteria_GCA_001787555.1
--------------------------------------------------------------------------MLVQGLCAALHS--SKTSA-----------------TPT-K-PH----PM----------D-ALMQK-SPPF--FHAKPGSLVEGAVVFKGKNKILIDL-EGVAIGIITGRELRDS--FNTFRDLNVGDSLSALILEEENDEGLIVMSLRMASQQKAWDRFQKLVENESTMQFIAQEANKGGLLANIDGIRTFLPVSQLAPINYPRVNNADVSEIMSRLQKFVGHTFTVKIMNMDKEAGKVVVSERDALSEQ----RSKALESLKVGDVKEGIVSGLVKFGLFVTF------------EGLEGLVHISEIAWGHVKNPAEYAEIG…
>CPR_Pe_Peregrinibacteria_GCA_001788955.1
--------------------------------------------------------------------------MLLVQGCMSIIS--FMQ-------------------ILQ-K-NT----VM----------E-QLLQE-SPPI--LRPHPGELLEGTIVFKGKNKILLDL-QGVATGIISGRELRDS--FNIFRTITPGDTINALVLEEENDEGLVVMSLRMASQKKAWDRFYTLIGSDHTMPFTAQEANKGGLLANVDGIRTFLPVSQLAPVHYPRVSNADSVEILQRLQRYVGHTFTVKIITMDEEAGKIVVSEREAMAEE----RAKSLESLRPGDIKEGIVSGIAKFGLFVTF------------EGLEGLVHISEIAWGHVKNPTEHAKSG…
>CPR_Pe_Peregrinibacteria_GCA_001789045.1
----------MEK-----------------------------------------------------------SVLACCSCRNTATS--SKT-------------------PST-A-TH----SM----------E-ELLRN-SPEV--LRPRPGELLEGTVIFKGKNKLLLDL-HGVTTAIISGRELRDS--FNTFRDLQIGSCVIALVLEEENDEGLVVMSLRKASQQKAWDHFHDLIGSGKTMPFTAQEANKGGLLANIDGIRTFLPVSQLAPAHYPRVSNADTSEILSRLQKLVGHTFSVKIITMDEDAGKIVVSEREAMAEE----RSKTLESLKMGDVRDGIVSGIAKFGLFVTF------------EGLEGLVHISEIAWGHVKNPAEHAEAG…
>CPR_Pe_Peregrinibacteria_GCA_001789155.1
----------MSRNRLTFP----------------------------------------------------VSPTRLLLVQGQSSS----V-------------------SAK-K-LS----PM----------E-ELLRS-GPPI--VRVRPGELVEGTVVFRGKNKLLLDL-QGSATGIVSGRELRDS--FNTFKNLKIGDVVSAMVLEEENDEGMIVLSLRMASQQKVWDRFHKLIEDHRTMEFTAQEANKGGLLANIDGIRTFLPVSQLAPVHYPRVNNADASEIIHRLGKYVGHTFLVKIITMDEDAGKIVVSEREAMSEE----RSKALEHLKIGDAKEGIVTGVVKFGLFVAF------------DGLEGLVHISEIAWGHVKNPAEFAEVG…
>CPR_Pe_Peregrinibacteria_GCA_001004735.1
----------MRK----YC-------------------------------------------------------QVARARTAWPTS--STT-------------------NAK-K-NS----VM----------E-KLLKE-APPI--VRVRPGQLIEGTVVFRGKNKLLLDI-GGTVTGIISGRELRDS--FNTFRELNIGDTVSAMVLEEENNEGMYVLSLRMASQQKAWERFHEIIENSKTMSFIAQEANKGGLLANIDGIRTFLPVSQLAPMHYPRVNNADTSEIMQRLAKYIGHTFTVKIITMDEEAGKIVVSEREALAEE----RSKALESLKVGEIKEGIVTGVVKFGLFVAF------------EGLEGLVHISEIAWGHVKNPSEYAEVG…
>CPR_Pe_Peregrinibacteria_GCA_001872575.1
----------------------------------------------------------------------------------------ARP-------------------APV-V-NS----IM----------E-QLLES-GPLI--VRVHPGELVEGTVVFKAKNKLLLDI-GGTQTGIVSGRELRDS--FNTFRSLHIGSPVTALVLEEENDEGMIVLSLRMASQQKAWDRFHKLVEFDGAMEFSAQEANKGGLLANMDGIRTFLPVSQLAPANYPRVNNADTGEIISKLKKFIGHSFTVKIITMDEEAGKIVVSEREAMAEE----RAKALESLKVGDVKDGIVSGIVKYGIFVSF------------DGVEGLVHISEIAWGHVRNPAEHAELG…
>CPR_Pe_Peregrinibacteria_GCA_001787535.1
----------MRR---SFC-------------------------------------------------------------CEDSCF--AKK-------------------AKR-T-NP----VM----------D-ALLKD-SPEV--VQVKPGELVEGTVVFRGKNKLLLDI-GGVTTGIVSGRELRDS--FNTFKDLKLGDPIMALVLEEENDEGMIVLSLRMASQQRAWDKFHRMVETDATMKFTPQEANKGGLLANIDGIRTFLPVSQLAPSNYPRVNNADASEIINRLQKFVGHTFTVKIITMDEDAGKIVVSEREAMAEE----RAKSLESLKAGDEKEGLVSGIVKFGLFVAF------------DGLEGLVHISEIAWGHVKNPSEFAEVG…
>CPR_Pe_Peregrinibacteria_GCA_001788925.1
-------------------------------------------------------------------------------------------------------------------------------------------------------------------------------------------------------------------------------------------------------------------------------------------------MTRLGKYIGHTFTVKIITMDEAAGKIVVSEREAMAEE----RAKALEHLKNGDTKEGIISGIVKFGLFVTF------------EGLEGLVHISEIAWGHVKNPSEHAAVG…
>CPR_others_Gracilibacteria_GCA_004563595.2
----------M---------------------------------------------------------------------------LYMTD-------------------VNK-D-IA----LF----------E-ELFKE-SPEI--KYPKTGEVISGTIIKIEKKNILVNV-NDQFTGLVINKEVGNT--VD-LSTLEAGQGIDVMVLGDSVERGLLILSLKRANQIKNLSNLAKYKESSEVITVKATEANKGGLLVDIDGLKGFIPVSQLTPLHYPRVEGANAEKILEHLEGLVGVPFKVRVINVDEGGKKIIFSEKAAIEES----REKALKSLKEGDIVEGVVSGILSYGLFVTF------------EGLEGLVHVSEIDWGHVNDPSKFAKVG…
>CPR_others_Gracilibacteria_GCA_000404725.1
----------------------------------------------------------------------------------------MMS-------------------DQK-D-LT----LF----------E-ELFKK-SPEI--KYPKVGEIITSTVEKIEKGNILVNV-NNQFSGLIVKKEVGNT--ID-ASSIEKGQVIDVMVLGDSVEKGLLILSLKRANQIKNLSNLAKYNESEEVITVRPTEANKGGLLVDIDGLKGFIPVSQLTPVHYPRVEGADPEKILAHLESLIGVEFKVRVINVDEYGKKIIFSEKAAIEEA----RGKALETLKEGDIVEGVVSGILSYGLFVTF------------EGLEGLVHVSEIDWGHVTDPSKFAKVG…
>CPR_others_Gracilibacteria_GCA_001871945.1
-------------------------------------------------------------------------MLRVQAS--STAP--FMS-------------------KAE-D--------F----------G-LVLKD-SAPI--HTPNMGELVSGTVVSANQKMILVDL-NGQFTGIISGSHMTSS--TEDSSMIKAGDLVDAIVIGDDKDSGLFMLSLRKASQIKLIAKLHSNFDTKEIITVIPNEANKGGLLIDLDGIKGFIPVSQLTPINYPRVEGANPEKILEHLGRLVGKPFKVRVINVDQDGKKIIFSEKAALEEA----RGESLKKLKIGDNVDGTVSGILTYGLFITF------------NGLEGLVHVSEIDWGHVSDPSKFAKVG…
>CPR_others_Absconditabacteria_GCA_001007975.1
---------------------------------------------------------------------------------------------------------------------------MA----K---ED-QLL----QNV--PVLKEGQKLKGVVVKKIDTGVLVDC-AGAITAIILQKEMRDL--LRGGVDLSVGASVEAELINIRHKEGYYIISVTKLLQIDVWKNILSKIETNEIFTVVPTEANLGGLLVDMHGIKGFIPLSQLAPIHYPRVEDGDQEQIFDKLLELIGKEFSVRAISVDEEEKRVILSEREALKEE----TEKILEEIEVGKSYNGVVSGVSSYGLFVTL-----------GGSVEGLVHISELTFGHVAHISKLAKIG…
>CPR_others_Absconditabacteria_GCA_000503875.1
----------MTP-------------------------------------------------------------------------KKVTE---------------------R-R-------AS----------S-GFL------V--PFIREGEKVKGTVLKKISNGVLVNC-ASIFTGIILSKEVKEL--EKSGYDLAPGREIELEIVNIRHEDGYYIVSITKLLQFDVWKAILRKFEDDEIITVIPTEANLGGLLVDMHGIKGFVPLSQLAPIHYPRVEDGDQEAIFEKLLDLIGQELRVRIINIDEEEKRIILSEREALKEE----RESVLKELEVGKIFDGVVSGISSYGLFVTI-----------GGTVEGLVHISEITYGHVNNIDNLGTIG…
>CPR_others_Andersenbacteria_GCA_001817065.1
----------MN------------------------------------------------------------------------------Q---------------------Q-K-SE----AM----------K-SIVEHREDML--NVPKVGEIVSGQVIDKARNALYLDL-GHLGVGVIYGRELLED--SEKFRETKLGDQLNATIQSLDNEDELIELSLRSISIEQSWKEIKSVLETGSILEVEILDANKGGLIVRIQGVTGFLPVSQLAPDHYPRVEGGDKNKILERLKSYVQEKFKVKIIGAERDSEKLIVSEKAAIGDE----MSHILKDINEGDIVEGAVSGIVEFGIFIKFNK--------DENELEGLVHISELAWQRIDNPGDIVSVG…
>CPR_others_Andersenbacteria_GCA_001817035.1
----------M---------------------------------------------------------------------------MKSES-------------------LAQ-D-QI----NM----------E-EVLAKHDDLA--HVPEKGEVLNGTILEKTSNALYIDI-GRFGVGVIYGKELFDD--LDTFKRSKIADTVQATVQELDNEDGYIELSLRSATRERSWEELRRKLDDDVAFESEIIDANKGGLIVRVNGVTGFLPVSQLAPDHYPRVEGGDKSKIQERLASYVGQIFKLKAITIDPENEKLIVSEKAAVSDE----ISATLEHLGKGKDVEGVISGIVDFGVFVKFEE--------SGQELEGLVHISELAWQRIDNPADFVSIG…
>CPR_others_Doudnabacteria_GCA_001779955.1
----------MTTAE----------------------------------------------------------STVTQ-VSA------PVM-------------------NFD-D-IK----SM----------Q-DLSNKYPESL--KALKVGDVVTGYVISVGKNEVSLSI-PSVGVGIVRGRELYDD--KVYLQNMKSGDEIAASVLDPDNENGMVELSFRQAGHERVWSALREKMDKKEILDTKILDANKGGLIVEINGVTGFLPVSQLTTAHYPRVEDGAKDRILEILKSYMGQTFRVQVITADPKEEKLIVSEKAVVEPE----LEQKMDQLKVGDIIEGTVTGVVDFGAFVKF-----------NQDLEGLVHISELAWQRIENPKDIIKVN…
>CPR_others_Doudnabacteria_GCA_001777585.1
IEGLRRVYYFMTEE------------------------------------------------------------QTAV-TDV------PQH--------------------VG-P-AK----TM----------T-DLVGAKGQTV--KLMQPGDVVEGNILSKGKNEVYIDI-PGYGLGVVRGRELYDD--ERVLSQMQLGDPVFALVVEQENKDGNVELSFRKAGHERVWSGLKELLDKKELIQSKILEANKGGLMVEINNVLGFLPVSQLSTLHYPRVEEGDKNKILSILQGYVGQMFTVRVITADAEEEKLIVSEKAAQEEE----LKGKLSKLAVGQSVEGTVTGVVDFGVFVKF-----------SDDLEGLVHISELAWQRIDDPKNIVKVG…
>CPR_others_Doudnabacteria_GCA_001779845.1
--------------------------------------------------------------------------------------------------------------MDN-P-GQ----SM----------Q-QLLEESPNKL--RVLRENDVVEGMILSVGKYEVYVDV-PGVGIGVVRGRELYDD--EQVLSALKLGDKVYASVIDIENRDGNIELSFRKAGQERVWQTLKEKLQTKETVHTKILEANKGGLMVRINNVLGFLPVSQLAPSHYPRVEDGDKNKILSVLKGFVGQDFDVRIITAEPEGEKLIVSERAVLEDQ----LIAKISKLTIGSVVEGVVTGVVDFGAFVKF-----------DDEMEGLVHISELAWQRIEDPRNIVKVG…
>CPR_others_Doudnabacteria_GCA_001779975.1
-YGL--FFFFMSE--------------------------------------------------------------------------------------------------------Q----TM----------E-ELLLQS--KI--KILAEGDVIKGRILSVGKNEVYVDV-DGIGIGVVRGRELYDD--ETILSSLKIGDEVFGSVIEVENKEGNLELSFRKAGLERVWQTLREKLESREIIKTKILEANKGGLMVRINNVVGFLPVSQLAPAHYPRVEDGDKNKILAVLRGFVGQDFDVRIITAEQDGEKLIVSERAVIEGE----LLQKIGKLSIGDVVDGEITGVVDFGAFVKF-----------GEGLEGLVHISELAWQRIENPKDIVKVG…
>CPR_others_Doudnabacteria_GCA_001777575.1
----------MTEHSLNIL-----------------------------------------------IFKEN-KRIIWK-LMT------NVA-------------------ITT-D-YQ----TM----------Q-DLLAAPGSEI--TVPKAGDVLEGTVLSVGKNEVYLDI-EGIGLGVVRGRELFDE--TVRLSALKIGDKVLASVLESENKEGNIELSFRQAGQERVWQTLEEKMRSREIINTKILEANKGGLMVEINGVMGFLPVSQLSTEHYPRVEEGDKNKILEVLKSYIGQMFDVQIITSDAHDEKLIVSEKATSEEA----LRAKVAKLKIGEIVEGEISGIVDFGIFLKF-----------GDGLEGLVHISELAWSRIEHPKDLFKVS…
>CPR_others_Doudnabacteria_GCA_001779985.1
----------MM----------------------------------------------------------------------------TT--------------------ATA-S-VK----TM----------Q-DLLALEGVEI--KVPKVDDVLEGRVLSVGKNEVYIDI-EGYGLGVVRGRELYDE--SVRLSSLKIGDPVVASVVEPENKEGNIELSFRQAGQERVWQTLIGRMQTREVIKTKIMEANKGGLIVEVNGVIGFLPVSQLSSEHYPRVEEGDKTKILEVLKSYVGNQFDVQIITADPRDEKLIVSEKAVGEDE----LRGKISKLTIGMNVEGEVSGIVDFGIFLKF-----------GQGLEGLVHISELAWSRIEHPKDLYKVG…
>CPR_others_Doudnabacteria_GCA_001779915.1
----------M--------------------------------------------------------------------SMT------NVA-------------------ATT-D-AK----TM----------Q-ELLAQDGAEI--NVPKAGDILEGRVLTISKNEVYVDI-PGIGLGVVRGRELYDE--SVRITTLKVGDTVLALVVESENKDGNIEMSFRAAGQERIWQTLSERLRSREVIKTKILEANKGGLMVEVNGVIGFLPVSQLSSEHYPRVEEGDKNKILEVLKSYVGKIFDVQVITADAQDEKLIVSEKAVGEEA----MRTKIGKLALEQVVDAEVSGIVDFGIFIKF-----------GEGLEGLVHISELAWNRIEHPKDLYKVG…
>CPR_others_Doudnabacteria_GCA_001780035.1
----------MS----------------------------------------------------------------------------NT--------------------ATM-D-AK----TM----------Q-ELLAADGGEI--KVPKAGDVIEGTVLTVAKNEVYVDI-EGIGLGVVRGRELYDE--SVRLGQLKAGDTVLAQVLEPENKDGNIELSFRAAGQERVWQTLAERLKAKEIIQTKIIEANKGGLMVELNGVVGFLPVSQLATEHYPRVEEGDKNKILEILKSYVGQTFDVQIITADPQEEKLIVSEKAVGEGA----LREKMGKLHIGDVVEGEVSGIVDFGIFMKF-----------GEGLEGLVHISELAWSRIEHPKDLYKVS…
>CPR_PB1_Jacksonbacteria_GCA_001873465.1
----------MTYFS-------------------------------------------------------------------------------------------------KTKINA-----T----------E-EKKEEENKKI--KFPRDGDLVEGTIIALKQDGIYLDI-GGLLTGIIRGPEAIDE--SGKLRSAKKGDKMEATVIEVENEKGLVELSLRYASHKKAWDSLKEIFGKGEVVKIKIVDANKGGLIVKYKNFQGFLPASQLQPQHYPRVEDGDKMKILEKLKAFVGKELDAKIITLEETEEKIIFSEKQIQPEE-------ETIKYKKGDIVEAKVTGLASFGAFVTF-----------DKGGEGLIHISELDWKRIEKPEEAVKIG…
>CPR_PB1_Jacksonbacteria_GCA_001818155.1
----PAPASTRTGPFVAVT-----------------------------------------------AFCCS-GLRLERMSILFDKYHYHTR-------------------TMP-S-TT----KL----------I-GLIND--HLS--TLPKIGDIVKGTIISASKSEILIDI-PGFTTGIVRGKEIKNL--QGEQQNLKPGDPVDAMVLDIENENGQMELSLKSAITETSWLYVKEKEENQELLDLRINGVNKGGLLLSIKSIPAFLPVSQLTQEHYPRVEGGDKKKILQKLKEFVGKTLRVKIISYSPEEQKIIVSEKRAWEEA----QKQKLAQYKIGDTVSTTVKSITNFGCFVTF-----------DDNLEGLIPIETIPIPEGQTISDVVRQN…
>CPR_PB1_Jacksonbacteria_GCA_001818275.1
----------MTKDWQKVM-----------------------------------------------------------MEITMTTMNPTVA-------------------ISA-A-TT----KL----------N-KLIND--HLS--NLPKNGDIVKAQILKSGRKEILVDI-PGFTTGVIRGREVKNL--PLEYQHLEPGTTIEAMVTDTENENGQMELSLQAALVETAWRFVKEKEERQEVIDIKINGANKGGLLASIKGMTAFLPVSQLIPEHYPHVEGGDKKRILKKLKDFVGKVLTVKIISSNPEEEKIIISEKKAWEET----QKLKILNFKVGQIITVNIKSITHFGAFVKF-----------DDNLEGLVHVSQIPAGDPDKLAEPLEIR…
>CPR_PB1_Jacksonbacteria_GCA_001818105.1
-------------------------------------------------------------------------MLILM-ALV------TPV-------------------KNT-K-NT----SM----------E-HLLEK--HPP--KIPKIGDVIEGVVLSVGKNELLIDI-DGVLTGIVRGKELQDE--MGEHESIKPGVPITVTVLDAENERGLIELSLKEAIHQRAWDTLRDLQKDGTKVVVPVVDANKGGLIVKLGGVIGFLPVSQLTTEHYPRVEGGDKNKILEKLKKFIGQKFDTKVITVNEGEQKLIVSEKAAWEEV----QHEKISQYEVGTIVEGAVSGIVDFGCFVKF-----------GDGLEGLVHISEMAWQRVDSPRDLVKVG…
>CPR_PB1_Kerfeldbacteria_GCA_001818285.1
----------MT----------------------------------------------------------------------------QVL-------------------GKQ-K-DT----IM----------D-TLLATP-DQP--QLPKVGDTVEGKVISVSKNEVFIDI-QGVLMGIVRGKEIFDE--SEGTGELQVGNVAQATVLDLENEKGMLELSFRQAGHQKAWGGLEHLMHDGTIIDVPVTDANKGGLMVRVGRIEGFLPVSQLTVEHYPRVEGGDKNRILELLMKFTGNTMRVKVIDINENDSKLIVSEKAAWEEE----QQGVLSQYKVGDAVEGKITGVVDFGAFVEF-----------GPHLEGLVHISELAWQRIDNPRDIVKVG…
>CPR_PB1_Kerfeldbacteria_GCA_001818785.1
----------MA-------------------------------------------------------------------KQK------KAV-------------------AKA-K-SD----AM----------Q-KLLAEHEKEV--VLPKVGDVIEGTVISAENNVVHIDI-KGIATGVVRGPELVDE--SGIFSNLRPGDIVNATVLEIENELGVLELSFREAGHQKAWESLIKLMQDHEVISVTVVDANKGGLIVRYGNLAGFMPVSQLTIEHYPRVEGANRQKILSKLQTYVGVAFQTCIIDVDEPENKLIFSEKAAKENE----QSEKLSGYNIGTIVEGVVTGVVDFGAFVEF-----------GDGLEGLVHISELAWQRIDHPKDIVAVG…
>CPR_PB1_Kerfeldbacteria_GCA_001818315.1
M---NVCFILM--------------------------------------------------------------------LAD------ALK-------------------IQE-H-NG----TF----------A-KLFST--VTV--KIPKPGDVIQGRVLSASKSEVQLDI-DGLTTGIIRGPELYDE--SGEQSNLRVGNVAEATVIDIENEKGIMELSFRFAGHAKAWKELEKLMREGRIVEAKIEEANKGGLLVKVGRVNGFLPVSQLTIEHYPRVEGGNRQRILERLQQYVGQAFKTKIIDVNEKENKLIVSERAAWEEK----QQEALSGYKVGNVIEGKVSGVVDFGAFVEF-----------GDGLEGLVHISELAWQRIENPRDIVKVG…
>CPR_PB1_Komeilibacteria_GCA_001872435.1
-------MYTMTTHDAQNS------GQEAEID----------------------------------SISE--KKEEKG-HNA------TIR-------------------YSQ-G-SG----EM----------D-SALKAH-SSI--SMPKQGELLQGTVLDISKNGIIVDI-NGTLTGLVRGKELDDE--SGQYSKLNLGEKVEATVLDLENEQGILELSFRQAGHRKAWNYLSELLSSGEVVDAKIIDANKGGLMVKVGNVEGFLPVSQLTVEHYPRVEGGDKNRILDRLKAYANELFRVKVITVREKEEKLIVSEKAAWEKE----QNALMSQYKVGDTVKGRATGVVDFGVFVEF-----------GDGLEGLIHISELAWQRIDNPSDVMKVG…
>CPR_PB1_Komeilibacteria_GCA_001818435.1
----------MTT-DIK------------ELA----------------------------------VAGV--KSLKKG-PQA------IMP-------------------LAH-G-SS----EM----------A-DLLSRN-ESA--FLPRVGDLVSGKVLSISKNGVVLDI-DGRLTGLVRGKELDDE--SGEYSKLAIGDGGEATILELENEQGMLELSFRQAGHRKAWDYLQKLFESGETVDAKIIDANKGGLMVKVGNVEGFLPVSQLTTEHYPRVEGGDRNRILERLKTYVNQTFKTKVITVKEQEEKLIVSEKQAWEKE----QNELLSRYSLGSIVEGVVTGVVDFGAFVEF-----------GDGLEGLVHISELAWQRIDNPQDIIKVG…
>CPR_PB1_Komeilibacteria_GCA_001818415.1
----------MRQ---------------------------P-------------------------------ERSMRS-MFT------ATQ-------------------AVS-T-TS----EM----------E-LLLKTKSDSL--RFPKTGDLIEGNVLSISRSEVLLDI-EGLTTGVVRGKELDDE--SGIASNLKIGDRATATVIDAENERGEIELSFRQAGHQKAWDNLEKLMRDETVVEAKIVDANKGGLMVKVGNVIGFMPVSQLTTENYPRIEGGDKNKILAYLKTFINKSLKAKVIDVNEFAEKLIVSEKAAWDEK----QKAVLSKYSVGDKVKGKITGVVDFGAFIEF-----------GEGLEGLIHISELAWQRIDDPKQIVHVG…
>CPR_PB1_Komeilibacteria_GCA_001818395.1
----------M-----------------------------------------------------------H-EHARYR-MNT--------A-------------------TVP-K-TS----AM----------E-LLVKNKMDAF--KFPKVGDLIEGTVISVSKNEVYLDI-AGITTGVIRGKELEDE--SDAASSLKLGEHAAATIVDLENERGEMELSFRQAGHQKAWDNLEKMLREETIVESKIIDANKGGLMVKVGNVVGFLPVSQLTTENYPRIEGGDKNKILAYLKTFVNKNLRTKIIDVNEADEKLIVSEKAAWDEK----QKASLAQYKIGDRVTGKITGVVDFGAFIEF-----------GEGLEGLIHISELAWQRIDDPKDIVKVG…
>CPR_PB1_Komeilibacteria_GCA_000991205.1
----------MS----------------------------------------------------------------------------VQE-------------------ENL-A-TS----KM----------A-ELLKDK-NAA--NMPKVGDLVEGKIISISKNEIYLDI-DGLTTGVIRGREIYDE--SEDSDKLKISDIASATVVDLENENGYMELSFREAGHQKAWGRLEKLYKAGELVESRVTDANKGGLMIKIGNVMGFLPVSQLTTEHYPRIEGGDKSKILSHLKSFINQNLRTKIIDLNEKEEKLIVSEKAAWDEK----QKAAVSKFKIGDRVHGIITGVVDFGAFVEF-----------DNNLEGLVHISELAWQRIDDPRDIVKVG…
>CPR_PB1_Komeilibacteria_GCA_001818445.1
------MIINMS-----------------------------------------------------------------------------EE-------------------KTI-S-QH----PM----------D-ELLKDE-KAF--SVPKLGDLVTGTVISVSKNEIYLDL-AGITTGIIRGREIYDE--SDDSSGLKIGDTAAATVIGLDNENGYMELSLREAGHKKAWDHLEKLHRDGNIVDSKVIDANKGGLMIKIGNVVGFLPVSQLTIEHYPRIEGGDKNKILTHLKSFVNQYLKTKVLDINEKEEKLIVSEKAAWDDK----QKKVISKFQVGDKIDGKVTGVVDFGAFVEF-----------GDGLEGLVHISELAWQRIDNPRDVIKVG…
>CPR_PB1_Komeilibacteria_GCA_001872245.1
----------M--------------------------------------------------------------------SNQ------LTE-------------------ETK-T-NS----KM----------A-ALLEQEENAI--NIPQVGDLVEGTVIYVGKNEIQLDI-NGVTTGIVRGKEIQDE--SGDLDNLKPGDKASATVVDLDNENGLVELSFRFAGHQKAWEKLEDLQKTGEIIKAKIIDANKGGLMIKVGNVIGFLPVSQLTTEHYPRIDGGDKNKILSHLKDFVNQEFKVKVIGVEEGEEKLIVSEKAAWEEK----QGAAISKYKVGDQVDGIVTGVVDFGAFVEF-----------GDGLEGLVHISELAWQRIDDPRDIIHVG…
>CPR_PB1_Komeilibacteria_GCA_000999255.1
----------MSV--------------ISEVK----------------------------------TKLV--NAKPKT-DKN------SLL-------------------NER-K-DH----PM----------T-GLLSQG-VAR--PVPKIGELIEGIVISSSKNEVLVDI-EGLTTGVIRGKEIYDE--SGEYSKIKPGDKIVATVLEIENESGQMELSFRYAGHQKAWEALEKLQQTQEVVEAKIFDANKGGLMAKVGNVMGFIPVSQLNTEHYPRVEGGDKSKILIALKKFIGQNFKVKIIDVNEIEEKLIFSEKSAWEEK----QQQAMYGFKVGDTVDGKITAVVDFGAFVEF-----------GDNLEGLVHISELAWQRIDDPKQIVKVG…
>CPR_PB1_Komeilibacteria_GCA_001818835.1
------MFLFIKL------------------------------------------------------------------MKI------TKI-------------------APK-K-SK----VM----------D-DLLLLA-EAK--SIPKTGDLVESTVLSVAKNEVYVDI-DGLTTGVVRGKEIYDE--SGEYSEVKVGDRVTATVLEMENENGEMELSFRFAGHQKAWNNLENLLKTQAVTPAKVIDANKGGLMVKLGNVIGFLPVSQLSIENYPRVEGGDKTKILSALRKFIGMPLKVKVIDINEQEEKLIVSEKAAWDEK----QQKTLARYKIGDVVEGKITGVTNFGAFVEF-----------GDALEGLIHISELAWQRIDDPKQIVKVG…
>CPR_PB1_Veblenbacteria_GCA_001822985.1
----------M--------------------------------------------------------------------PKR------KKL-------------------EPK-T-NV----AM----------E-QLLASG-NAP--AVPKVGDIIEGVVTNMGKREVRLDI-PGFTTGIVRGRELIDE--SGEYSNLKVGDNVAATVLELENERGELELSFRNAGHQKAWGNLEDLKRKAEIVIVKVMDANKGGLMVKLGQVDGFLPVSQLAVEHYPRVEGGDKNRILELLKQLIGKEMEVKVMTVQEDEEKLIFSERAAWEEK----QKDKLDQFKVGDIVEGKISGVVDFGCFVEF-----------GQGLEGLVHISELAWQRIDNPRDVVKSG…
>CPR_PB1_Falkowbacteria_GCA_016699775.1
-------------------------------------------------------------------------------MMK------NTK-------------------VSD-S-TS----DF----------A-SLMKE--EGF--KIPQVGDTVFGKILSASKAEVRLDI-GGVMTGVVRGRELYFE--ASEFSKLKPGEEIEATVIDAENENGELELSFRFAGQEKTWQAIMEAYEKKQPIKVKISAANRGGLLVMYTQIPAFLPVSQLSPENYPRVAGGDKTKILEKLKSLVGQEIEVKIITLDRKEEKLVVSEKDAWQEK----QKDFISQYKVGDTVEGRIIAVTGFGVFVNF-----------GGNLEGLIHISELAWQRIEDPSETYKVG…
>CPR_PB1_Falkowbacteria_GCA_001780195.1
-------MIFMP---------------------------------------------------------------------------EEKN-------------------TTK-T-KD----EL----------G-KLLSKDEQLV--KIPSVGDLITGRVLSVSKNEVRLDI-EGMTTGIVRSAELFND--LEEYKNMKEGDEAEATILELDNENGEMELSFRAAGEIKTWETLQKAVKEKKIVKGVVKEANKGGLVVKILSVDAFLPVSQLSGEHYPKVHGGDRGKILEKLKRLINQEISVKIMSISKQDENIIVSEKEAAYEM----QNEVIAQFKLGEVVEGIITAITDFGAFVKI-----------DKKAEGLIHISEIAWQKIENLKHHLKEG…
>CPR_PB1_Falkowbacteria_GCA_001778095.1
----------M-----------------------------------------------------------------------------MDT-------------------TNN-E-KQ----SL----------E-QLLADP-NFL--KIPKVGDVVRGKVLSISKNEVHLDI-EGLTTGIVRGEELCNE--SSDYADLKPGEETEATVLELENEKGEMELSFRFAGHKKIWDKLNETLKSGEIVNATVTDANKGGLMVNVNKIMGFLPVSQLAPEHYPRIPGGEKAKILEKLRQFAGLVLEVKIIDANGEEEKLIVSEKAAWEER----QKNIISSYKVGDIVEGTISALADFGAFVKF------------ENLEGLVHISEIAWQRIEHPEDVVKIG…
>CPR_PB1_Falkowbacteria_GCA_001778235.1
MKG----GIFITYFNKSST------DRPKIYM-----------------------------------VAT--KSKKIA-QKK------ALQ-------------------EKD-L-NS----KM----------A-QLLEKDITNF--KPLEMNQLVKGTVINATKTEVLVDV-EGITTGIIRGKELSYD--TEEQQQLKVGDNVEATVIDLENEIGMLELSFRFASHQKAWENLDIFRQENKIVSAKILDANKGGLLITVNGVKGFLPVSQLNPEHYPRVPGGDKNKILDKLKSYVGESFEAKVIDVDESQEKLIVSEKAAWEET----QKDVLDKYKVGDVIDGTITAVTDFGIFIKF-----------GENLEGLVHISELAWQRIDNPAELFKVG…
>CPR_PB1_Falkowbacteria_GCA_001778275.1
-------------------------------------------------------------------------------PRK------KIV-------------------EET-K-SS----PM----------Q-DLIDQDVILR--ALPKVGDIVKGKVITASKKEVLLDL-NGAMTGLIRNKELYNE--AEEFANLKPGDETEATVLELENEQGMLELSFRYAGHQRTWSSLQKLKAENQAVAAKVTDANKGGLLVMVNNVAGFLPVSQLSPEFYPRVQGGDKNKILEKLKGYVGQKFNVKVLDVDPDNEKLIVSEKAAWEEN----QKGVLDKYKIGDVVEGKITAVTDFGVFVEF-----------GERLEGLVHISELAWQRIDSPSDLYKVG…
>CPR_PB1_Falkowbacteria_GCA_000992955.1
--------MTITLFSNS------------IYL----------------------------------QIDL--RWSDIF-ERS------HFT-------------------MTKLK-TT----EM----------G-KLLESDSSMS--SFPNVGDILTGKVVAASKKEVLLDF-NGVQTGIVRGKELYNE--AEEFANLKTGDEVEATVMDLENEQGMLELSFRFAGHQKAWAVLQTYKDENKTVSARINDANKGGLLVTVANIHGFLPVSQLSPEYYPRVQGGDKNKILEKLKTYVGQDFQVKVLDADEESEKLIVSEKNAWEEE----QKDVLNKYNVGDLIEGTITAVTDFGVFVEF-----------GENLEGLIHISELAWQRIDDPRELFDVN…
>CPR_PB1_Falkowbacteria_GCA_001778005.1
----------MSRHK---------------------------------------------------------YKNMSK-TNK------ATE-------------------QKI-K-PT----AF----------A-ELLAD--EEI--AAPKIGDIVKGTVIVASKSEIKLDI-GGVMVGIVRGKELYRE--SPEYANLKEGDEIEATVIDLENENGELELSFSYAGHQKAWETLQAAFENQAIIIVKVKEANKGGLIVSYGQTNGFLPVSQLSPENYPRVGGGDKSKIFEKLKSFINKEMEVKVMDLSDKEDKLIVSEKLAWSDK----QKDVIAQYKPGSIVEGVATAVTSFGVFISF-----------GEGLEGLIHISELAWQRIENPADLIKVG…
>CPR_PB1_Falkowbacteria_GCA_001778085.1
----------M---------------------------------------------------------------------------FMPEK-------------------NTQ-T-ND----EF----------Q-ALLEQ--DSF--TPPKVGDIVTGTVLSASNAEVKLDI-GGIMVGIVRGRELYRE--APEYANLKTGDTIEATVIDTENESGELELSFSYAGHQKAWAALSDALENKKIIAVKIKEANKGGLVVIYGQIVGFLPVSQLSPDNYPRVSGGDKSKILEKLKSFVGTDMEAKVMDLNEKEEKFIVSEKMAWSEK----QRDVISQYKPGTVVVGTITAVTSFGVFISF-----------GEGLEGLIHISELAWQRIENPADHYKVG…
>CPR_PB1_Falkowbacteria_GCA_001778055.1
----------MAEETKKNN-----------------------------------------------------KPFNPD-ELN--------H-------------------DPA-S-RE----EF----------Q-KLLDK--ENI--KIPVAGDIVKGTVLAASKAEVKLDV-GGITTGVVRGRELYFE--AEEYANLKSGDEVEATIIEEENENGELELSFRSAGQQKAWSTLIDAYDNRKILKVRINDANKGGLLVSFAQIQGFLPVSQLAPENYPRVNGGDKGKILDKLKSFIGVDFEVKVMTLDEPDEKLIVSEKEAWQEK----QKDIISKYRVGSVVSGAITALTDFGVFLNF-----------GENLEGLIHISELAWQRIDDPSDLFKVG…
>CPR_PB1_Falkowbacteria_GCA_000997945.1
----------MRE-----------------------------------------------------------FLFMTD-EIT------NDSL-----------------ADQA-S-RD----NF----------Q-KLLDK--ENL--KIPLVGDIVKGTVLAASKAEVKLDI-DGITTGVVRGRELYFE--ADEYAHLKPGDEVDATIIEEENENGELELSFRSAGQQKAWSTLVDAFANRKILKVKVNDVNKGGLLVSFAQIQGFLPVSQLAPENYPRVNGGDKGKILDKLRSFIGADFEIKVMTLDEKDEKLVVSEKEAWQEK----QKDIISKYKVGSVVEGSITALTDFGVFLSF-----------GENLEGLIHISELAWQRIEDPADLFKVG…
>CPR_PB1_Falkowbacteria_GCA_001780275.1
------------------------------------------------------------------------MKNMTD-EKK--------E-------------------VSS-D-GE----EF----------K-DLLDR--NVV--KVPQVGELIRGKVITASKAEVKLDI-DGVMTGVVRGPELYEE--DDEYATLKPGSEVDATVIDDENENGELELSFRIAGQERAWAGIQDAYENKKIIRVRIVDANKGGLLAKYRQIAGFLPVSQLAPENYPRVSGGDKSKILDKLRSFAGQEFEVKVITLEEKDDKIIFSEKEAWNEK----QQDVISKYKVGTAIEGKITAITDFGVFVSF-----------GENLEGLIHISELAWQRIDDPGDLYKVG…
>CPR_PB1_Falkowbacteria_GCA_001778325.1
----------MTQKSKKQ---------------------------------------------------------MTE-EKN------KNF-------------------NHG-D-QD----DF----------E-RLLKK--DNF--QIPKTGDLIKGVVITASRAEVKLDI-GGFMTGVVRGPEVYEE--DDDYANLKPGDEVEATVIDTENENGELELSFRVAGQERTWSGLMASYKDKTSIKVRIIDANKGGLLVKYKQIPGFLPVSQLAPENYPRISGGDKGKILEKLKSFVGKDFEVKVMNIDEKEDKIIFSEKDAWNEK----QKDVISKYKIGKKIKGTITAITDFGVFVSF-----------GENLEGLIHISELAWQRIDNPADLYRVG…
>CPR_PB1_Falkowbacteria_GCA_000992665.1
----------MLFF----------------------------------------------------------CNNMTK----------IDE-------------------KEI-S-RD----DF----------S-KMLDD--YKF--KAPQVGELVTGEVISASKAEVKLDI-NGIMTGVVRGPELYEE--DEEYAGLKPGETVEATVLEMENENGEIELSFKYAGQEKAWEGLREAEKSRSVIKVKVIDANKGGLLVKYRQISGFLPVSQLAPENYPRINGGDKSKILDKLRSFAGQEFEVKVMTLNEKEDKIIFSEKDAWSER----QKDTISKYQVGAIVEGAITAITDFGVFISF-----------GENLEGLIHISELAWQRIDDPAELYKVG…
>CPR_PB1_Falkowbacteria_GCA_000994905.1
----------M---------------------------------------------------------------------------------------------------TDN-K-TS----NF----------G-ELLDK--FEL--AVPEVGETVKGKVISASKAEVRLDI-NGVQTGVVRGRELYFE--ADEYANLQPGDEIVATVVDQENENGELELSFRYAGEAKAWDTLLAAFKNKESIKVKVKEANRGGLLVSYMQVSAFLPVSQLSPENYPRVSGGDKNKILEKLKSIIGTELEVKIITLEKEEEKLVVSEKEAWQEK----QSDVIAKYTVGTLVKGTITAITNFGVFINF-----------GENLEGLIHISELAWQRIDDPADLYKVG…
>CPR_PB1_Falkowbacteria_GCA_001871165.1
----------MYNM----------------------------------------------------------GNNNKE-EEN------KTN-------------------DVA-A-SD----EF----------E-KLLAK--DDI--KIPQVGEIVKGVIVTASKSEVKMDI-NGVLMGIIRGPELYNE--VEEFANLKSGDEIEAAVIDAENENGELELSFRLVGQEKAWEKLHAALKDKTTIKVKIVDANKGGLLSRYGQIDGFLPVSQLAPDNYPRIAGGDKSRILEKLKSFVGQEFEVAVITLNEEENKIIFSEKDVWNKK----QRPALDKYRVGMPVDGKITAITNFGVFVSF-----------GENIEGLIHISELAWQRIDSPNDMYQVG…
>CPR_PB1_Falkowbacteria_GCA_000999715.1
----------MRIIS---------------------------------------------------------LSLTRRAEVTAGPDYMDDQ-------------------NLE-Q-LD----EF----------E-KLLKK--DNI--KIPQTGDIVKGKVVAASKSEVKLDV-DGVLMGIIRGPELYNE--VEEFSRLKPGDEIEAAVIDAENENGELELSFRLVGQEKAWNKLRQAFKDKTTIKVKIMDANKGGLLSRYCQIDGFLPVSQLAPENYPRISGGDKSKILEKLKSFVGQEFEVTVITLNEEDNKVIFSEKDVWNRK----QKPALDKYQIGMVAEGKITAITNFGVFISF-----------GENIEGLIHISELAWQRIDSPSEMYKVG…
>CPR_PB1_Kuenenbacteria_GCA_001783645.1
----------M---------------------------------------------------------------------------FMVTS-------------------SKI-E-VS----SM----------E-KLLNSE-ENP--VLPKTGDLIEGEVLFVGRNEIMVDV-DGLLTGIIRGYEAYDE--SGEYSHLAMGDKISATVIDNENEKGLVELSLKQAGHKKAWDKIRKAKQEGEIVEVSVLDANKGGLMVRLDQTFGFLPVSQLSPEHYPRVIGGNKNKILEKLKTLINGKFKVRILDVNDDDGTLIVSERAVDMEE----RKKILAEYQKGDMVEGTITGVVDFGAFMEF-----------GNGLEGLIHISELGWQRIDDPHDIVKEG…
>CPR_PB1_Kuenenbacteria_GCA_001783595.1
----------MNSRQKYLF-FC------------------P------------------------DFIGII-IYNMSKITNKT-------A-------------------DKA-K-TN----EM----------E-KILNSA-DSP--SLIKAGDLVEGVVIYVGRNEILLDL-GGLATGLIRGHESYDE--SGEYTALKIGDTICTTVVDTENEKGLVELSIRQAGHKKAWDKLRQMKASGEIVEANVFDANKGGLMVKLDQVLGFLPVSQLSPENYPRVIGGNKTRILEKLKSLVGSKLKVQVIDVNDEQGVLIVSEKATACEE----RKKILEQYKKGDVVTGLVTGVVDFGAFMEF-----------GQGLEGLIHISELGWQRIDDPRDVVKEG…
>CPR_PB1_Buchananbacteria_GCA_001817505.1
-------------------------------------------------------------------------------MKI------MAI-------------------GVK-K-ES----EF----------K-KLLEDK-QYF--NLPKIGDLVKGTVISASKNEVYIDL-GGIATGLVRGKECYGE--SEEYRNLKPGDEVEATVLELENENGEVELSFRYAGRQRAWQDIKKVEESGQIINAIITDANKGGLMVKLGSTLGFLPVSQLSPEHYPRVPGGDKNRILEILKSYVSQKFEVKIIDTDENEDKLIVSEKAAWEET----QKDVINRYKVGQVVEGVVTAVTDFGIFVEF------------DKLEGLIHISEIAWKRIDNPSDFVKVG…
>CPR_PB1_Buchananbacteria_GCA_001817255.1
----------MKLQS----------LPISYYL----------------------------------------FPPNLM-SNK------DIQ-------------------PTQ-S-NS----EF----------S-KLIADP-QYL--KLPKVGDVVKGKVISVSKSEVHLDI-NGIKTGIVRGRELYNE--SDEYGHLKMDDTVEATVIELENENGEMELSFRYAGQQRAWDNLRDLMKSGEVINIKINDANKGGLMVKIGHISGFLPVSQLIPEHYPRVEGGDKNKILEFLKKFVNQILKVKVIDIDEKEDKLIVSEKAAWEEA----QEKIISKYKVGDKIKGKITAVTDFGVFVEF-----------DNKMEGLVHISELAWQRIDDPRDIVNIG…
>CPR_PB1_Buchananbacteria_GCA_001817265.1
----------M--------------FLITYYIL-------P-------------------------------ISYKSM-SDK------NIK-------------------QTD-S-NS----EF----------A-KLISDN-QYT--KLPKVGDVINGRVISASKAEVKIDF-EGIKTGVVRGRELYNE--SDEYGHLKPGDMVESTVVEQENENGEMELSFRYAGQQKAWGNLKELMKTGEVLSLKITEANKGGLMVKIGNITGFLPVSQLIPEHYPRVEGGDKNKILEFLKKFIGQPLQIKVIDANEKEDKLIVSEKAAWEDV----QEKAVSQFKAGEHIKGKITAVTDFGAFVEF-----------GNKMEGLVHISELAWQRIDDPRDVVRVG…
>CPR_PB1_Buchananbacteria_GCA_000992395.1
----------MQKIEKYVI------ISYTYLI--------------------------------------H-PTIMSD-NEK------NVS-------------------END-T-SL----NI----------K-QLLSNN-DYT--NIPKVGDVVKGIVVSVTKSEVLIDI-NGLTIGVIRGRELFDE--SNENAVLKPGDEIETTVIELENEKGEMELSLRSSGHQKAWASLQELMKNSKIVDTQITDANKGGLMIKIGQIAGFLPVSQLSPEHYPRIPGGDKNKILDRLRDYTGKTFEVKVIDISETENKLIVSEKAAWEEK----QHDVISKYKIGNVVEGKVTAVTDFGVFVEF-----------GEHLEGLIHISELAWQRIDNPRDIVKEG…
>CPR_PB1_Buchananbacteria_GCA_001817385.1
--------MYM--------------------------------------------------------------------SDK------TLV-------------------KDK-K-TS----PL----------G-QMLAEG-NFV--NIPRVGELVKGMVIDVSNSEIRLDI-DGLTTGVVRGREFYDE--SNEYSDLKIGDEVEATVLELENENGEMELSLRFAGHQKAWGGLRQLMETSQVVDVAITDANKGGLMIKLGKVSGFLPVSQLTPEHYPRVPGGDRNKILDRLKSFIGTSFEVKVIDVDDREDKLIVSEKAAWEEK----QRDVLAQYKPGTVVEGKVTAITDFGVFVEF-----------GDKLEGLIHISELAWQRIDDPHNFVTVG…
>CPR_PB1_Buchananbacteria_GCA_001817495.1
----------MS-------------LPNNWQVK---------------------------------------RKCMEKNPAV------KEE-------------------VKS-K-AP----QL----------K-KMLAEG-DFI--KIPKVGDIVVGKVIDIGKSEVRIDI-DGLTTGVVRGREFYDE--SNEHSDLKVGDEVEATVLDLENENGEMELSFRFAGHQRAWSRLAELQTSGEISEVAITDANKGGLIVSLGKVSGFLPVSQLMPEHYPRVPGGDKQKIFERLKSYVGATFSVKVIDLNENEDKLIVSEKAAWEDK----QRTVISSYKIGQVVLGTVTAVTDFGIFIEF-----------GENLEGLIHISELAWQRIDDPADLIKVG…
>CPR_PB1_Buchananbacteria_GCA_001817345.1
----------MT------------------------------------------------------------TSK----LNR------IKV-------------------EEK-P-TS----QL----------S-KLLAEG-DFI--KIPKVGELVKGTVIDISKSEVRIDI-DGLTTGVVRGREFYDE--SSESGSLKAGDVIEATVIDLENENGEMELSLRFASHQRAWDGLANLRGSGEIVNVEITDANKGGLMVKVGKIPGFLPVSQLSPEHYPRVPGGDKNRILERLRSYIGKKFEVKVMDTAEAEDKLIVSEKLVWEEK----QKEVIASFKVGTVVEGKITAVTDFGVFVEF-----------GQNLEGLIHISELAWQRIDDPGNLFKVG…
>CPR_PB1_Buchananbacteria_GCA_001817305.1
----------MS-------------------------------------------------------------------QVK------IKE-------------------GGE-Q-AS----QL----------K-KILAEG-DFV--KIPKIGDLVKGKVIDISKSEIRLDI-DGLTTGVVRGREFYDE--SNEYSDLKVGEEVEATVLELENENGEMELSFRFAGHQKAWDNLTNLRDKSEIIKIEITDANKGGLMIKLGKTAGFLPVSQLAPEHYPRVPGGDKNRILDRLKSYVGQKFEVKVLDIDEKEDKLIVSEKAAWEDK----QKEVISSYKVCDTVEGKVTAVTDFGVFVEF-----------GDNLEGLIHISELAWQRIDDPADFVKVG…
>CPR_PB1_Buchananbacteria_GCA_001817615.1
-------MINMP------------------------------------------------------------EEKQAK-AKA------DVL-------------------AED-S-DS----PF----------K-KLINEG-NYA--EIPKVGDIVKGKVIDIERSEIRVDI-EGFTTGIVRGKEFFDA--GSEPADLKIGDEVEATVIELENENGEMELSFRFAGHQRAWDELSALKNGSLPVKAVITDANKGGLMVKVGKVPGFLPVSQLTPEHYPRVPGGDKNKILERLRSYIGQDFSVKVIDVNESEEKLIVSEKANWEEK----QKEVIAGYKAGETVEGKVTAVTDFGVFVEF-----------GDKLEGLVHISELAWQRIDDPNDLVKVG…
>CPR_PB1_Buchananbacteria_GCA_001817425.1
MKP---FFLFME---------------NSIKI----------------------------------LEPP--LTSAGN-QKE------NQA-------------------VVN-E-AG----SF----------K-KIFAEA-NF---KIPQVGDIVAGKIIDISRGEIRVDL-EGLTTGVVRGRELMEA--ADDYSDLKVGDEVEATVIESENENGEMELSFRFAGQQKAWHDLIVLKTEGQIIKALITDANKGGLMIKVGKVTGFLPVSQLMPEHYPRVPGGDKNKILERLKSYIGSEFEVKVIDADEAEEKLIVSEKAAWEEK----QKDVIASYKVGDVIEGVVTAVTDFGVFVEF-----------GDKLEGLVHISELAWQRIENPNDFLKVG…
>CPR_PB1_Uhrbacteria_GCA_001791465.1
----------M-SQEVNTE-----------------------------------------------------LKNMAKL-------KSETK-------------------PGE-K-PS----VM----------E-TLLAT-GDAA--AIPRVNELVNAKVISMSKGEVLLDI-DGLTTGVVRGKELADE--SGEFSNLTVGDVVQATVLELENELGMMELSFRSAGHRKAWGHLEDLRKSGEVVEVRVMDANKGGLIVTLGRVTGFLPVSQLTFEHYPRVEGGNKQKILERLRTYMGQSFKVKVIDVKPLEEKLIVSEKAAALTE----RISSLQGLKGGMTVEGKVTSVVDFGAFVEFALPAA-SQETGGEKVEGLIHISELAWHRVDHPKDVVSVG…
>CPR_PB1_Uhrbacteria_GCA_001791575.1
----------M------------------------------------------------------------NVNFFVSV-------PTVKA-------------------KTD-K-PT----VM----------D-ELLNA-DGAA--PIPKTGEIVNARVIAVAKGEVILDL-DGFTTGVVRGKELTDE--SGEFSHLQVGDDVQATVLELENERGMMELSFRSAGHRKAWGRLEELRKSGEVVEVRVMDANKGGLIVMVGRVGGFLPVSQLTYEHYPRVEGGNKQKILERLRTYTGQQFKVKVIDVKPLEEKLIVSEKAAALTE----RIASLEELKAGAVVEGKVTSVVDFGAFVEFTVPAA-AGAGEPELIEGLIHISEIAWHRVDHPKDMLSLG…
>CPR_PB1_Uhrbacteria_GCA_001873525.1
----------MGTVRSRNE--------------------------------------------------KH-AQVMTR-MAT------KGT-------------------QDT-P-PS----SF----------E-ELLKTNDAYT--AVPQVGKLVIGTVVNVTSKEVHIDV-GGLTTGVVRGHELFEG--GRGYKDIKVGDEVEATVLDLENENGEMELSFRFAGQQKLWDRFYVLQKSEEVVPVTILEANKGGLLVELEHMKGFLPVSQLTPEHYPRVPGGDKHKILEKLRSYVGEEFRVKVLDVDQEEEKLIVSEKAAWEEK----QKEILQKFEPGQVVEGTISALADFGAFLAF-----------GEGIEGLIHISEIAWQRVEHPKDIVQVG…
>CPR_PB1_Uhrbacteria_GCA_016699205.1
----------MFSYRLSFF---------------------------------------------------H-----------------STM-------------------ETK-V-TS----AL----------G-ELLES--QPI--AYPQVGETVKGTVVAVGRNEVRIDV-GGLAIGLIRGPEM------DKHMDLRVGDEVEASVIELDNEFGELELSLKGAGRKRSWDKIKELLTAGTVLNVKVLDANKGGLITRVEGVPAFVPVSQLSPTNYPRVAGGEKNKIQEKLKQLVGQMIDVKILDVNEEEEKVVVSEKAVWETK----QESILSKYKVGDTVEGDVTAVTDFGAFVRF-----------EANLEGLVHISEIAWQRIDHPRDVLKIG…
>CPR_PB1_Uhrbacteria_GCA_001791325.1
----------M--------------------------------------------------------------GTMKA-ILA------QPI-------------------TKS-A-AS----DF----------Q-RLLEDK-QFL--TLPKVGDIVKGRALSVSKTEVHLDI-GGYASGVVRGRELYNE--SAEYGDLKIGDETEATVIELENELGELELSFRFAGQRKSWDNINTLKDDSSMVEVEVVEANKGGLLVRMGHVVGFLPVSQLLPEHYPRVPGGDKTKIQDQLKAYIGQHLKVKVLDVSPDDDKLIFSEKKIVEDE----QLSRISSHGVGEVHEGPITAITDFGAFMEF-----------NEGLTGLIHISELAWQRVDHPTDVVKIG…
>CPR_PB1_Uhrbacteria_GCA_001791425.1
----------MYT-----------------------------------------------------------GVTMKL-AAI------QPM-------------------AKS-L-AP----DL----------Q-RLLEDK-QFL--AIPKVGDVVKGRVLSASKTEVHLDI-GGYAAGVVRGRELYNE--SPEYGNLKVGDEVEATVLEMENELGELELSFRFAGQRKSWDNINILRDVGTTVEVEVMEANRGGLLVRLDHLNGFLPVSQLLPEHYPRVPGGDKAKIQDQLKTYVGQRFKVKVLDVSPDDEKLIFSEKKIVEDE----QLARVAAHQVGEVYEGPVTAITDFGAFMQF-----------ADGLTGLIHISELAWQRVDHPTDVVKIG…
>CPR_PB1_Uhrbacteria_GCA_001791115.1
----------MKAANRN-------------------------------------------------------KGKINM-QLL------TKE-------------------DKK-T-DS----EF----------K-RLLGDE-QFL--RVPKVGDVIKGTVLSVARNEVRIDL-PGYKTGVVRGAELFQE--SGEPAGLKLDAEVEATVVELENENGDVELSFRFAGVRRLWDSLQQLRASGAAVPAEVIEANKGGLMIRVNRAPGFLPVSQLSPEHYPRVAGGEKQKILEKLRGFIGTTLMVKILDASEAEEKLIVSEKAVWEDE----QRSTLERFHVGDTVEGEVTALTDFGAFVKF------------SSLEGLVHISEIAWQRIDHPRDVLAVG…
>CPR_PB1_Uhrbacteria_GCA_001791415.1
--------------------------------------------------------------------------------MP------TII-------------------ATP-V-SE----EL----------K-KLFSTK-DFV--QVPKEGDTVKGTIIAISPREVLIDI-DGYKTGIVRGEELQDK--EAA-SRLKVGDQVEATVLDLENEEGHVELSLKFAGKVRAAQTALDAKITGMTVDVKIVDANRGGLMAIWSQMTGFIPVSQLSPEHYPRVPGGDKGKILEKLRSFIGTTIRAKVLDCDPKEDKLIFSEKALWEEE----QKDLLTKYKVGDVVEGVITAIADFGVFVGF------------DGLEGLVHISEIAWQRIDNPSDLVKVD…
>CPR_PB1_Uhrbacteria_GCA_001001705.1
MRRRSCGSLKIFKFRCEKL---------------------------------------------------F-CKRSLK-HML------ISN-------------------TIE-V-SE----EL----------K-NLLTTK-DFF--NIPKADDVIKGIVISMSPREILIDI-PGYKTGLISGVGLQEQ--QSIYPDLKIGDEIEAIVIDLENEEGFVELSFHGAGQTKAWDDVLSVKQTGKVVEVKVVDANRGGLMCVLGRTAGFLPVSQLAPEHYPRVAGGDKSKILDKLRSFIDQNLRVRVLDADPKENKLIFSEKALWEEE----QKEHLAKYKVGDVVEGTITAVTDFGVFVSF------------DDLEGLVHISEIAWQRIDNPADLVKVS…
>CPR_PB1_Uhrbacteria_GCA_001791275.1
----------MNVLAFGGT---------------------P-----------------------------R-FNPHRR-MTT------LTK-------------------TVA-P-QS----EF----------E-KLLAQE-SMS--QFPKIGDVLKGTVIAVGRNEARIDI-GGLAVGIVRGPEL------DPSADLHAGDEVDVTVVELDNEYGELELSLKGAGKRKSWDRLKDLFAQGTVISAKIIEANKGGLIVRFENVNAFLPVSQLSPENYPRVAGGEKAKILEKLRGLVGTNMDVKVIDVSENEDKIIVSEKAVWETK----QESVISKHTIGEIVEGDVTAVTDFGAFVRF-----------DTNLEGLVHISEIAWQRIEHPKDVLTVG…
>CPR_PB1_Uhrbacteria_GCA_001303185.1
----------MTD------------------------------------------------------------------QNN----GLEAV-------------------QGK-Q-SL----DL----------T-TLLSDR-TFL--NIPKVGDLVKGTVISVGNNEVNIDI-HGYRTGVVRGREIQDP--SRVYSDVKIGDEVEATVVDLENENGDVELSFRFAGHRKAWDNLAQLFRSGEMVAAQVHEASKGGLLIRLNNIPGFLPVSQLAPENYPRVSGGDKSRILEKLKKFVGQDLDVKVIDVNEAEEKLIVSEKAVWEEK----QKNVIAKYQVGEIVEGKVSALTDFGAFVKF------------DILEGLVHISEIAWQRIDHPRDLLRVG…
>CPR_PB1_Uhrbacteria_GCA_001791745.1
----------MA------------------------------------------------------------EDSAIN-GQE------ETL-------------------TRP-T-GP----NF----------K-TFMVDK-TFL--NIPKTGDVVKGKVIAVGKNEVRIEI-DGFRTGVVRGREIVDP--SREFSDVKVDDEVEATVIDLENENGDVELSFRFAGHRRAWDQIQELFRSGEPVNIKITEASKGGLLVRLNHVPGFLPVSQLAPENYPRVAGGDKSKILDKLKKFVGKEIEVRVLDVNETEEKLIVSEKAVWEEK----QRSVIAKYKVGDAIEGEVSALAEFGAFVKF------------DILEGLVHISEIAWQRIDHPKNLLQVG…
>CPR_PB1_Uhrbacteria_GCA_001791035.1
----------M-------------------------------------------------------------------------------N-------------------MSP-Q-ST----KM----------D-ELLEHG-GFA--NVPDVGDTIKGTVVSASRREVRIDI-DGLTVGIVRGRELFAE--SEKYSSLKPGDTVEATVIDLENENGEMELSFKYAGESKAWDSMRELFTNGQTISAKILDANKGGLIVKAEFLGGFLPVSQLAPEHYPRVSGGAKARILEKLKDYVGQTFRVKVIDVHEDENKLIVSEKAVWEEE----QQTVIAQYNVGDHIEGIVTAVADFGAFVKFPLEA-----DEASYLEGLVHISEIAWQRIDHPKDFVKVG…
>CPR_PB1_Uhrbacteria_GCA_000997055.1
------------------------------------------------------------------------------------------M-------------------TDT-N-TQ----QL----------S-ELLEND-QYL--NIPELGALITATVISIKGREVRLDV-NGITTGVVRGRELFSE--GDAFSGLKKGDKVEATVIDLENENGEMELSFRFAGNKKSWEDLKEQFQKNEVVEVKVTDANKGGLIVKLNHITGFLPVSQLAPENYPRVSGGDKVKILEKLKDFIGNKVRVHILDLNTEEEKLIVSEKTIWEDE----QKNVISKIAIGDIIEGDITALADFGAFVKFLPKGV----DPAGALEGLVHISEIAWQRIDHPKDLLKTG…
>CPR_PB1_Uhrbacteria_GCA_001004485.1
----------MKG-----------------------------------------------------------LSARAG-TPS------GNN-------------------MAN-D-KK----QL----------G-ELLDEG-NFF--HIPAVGETVKGQVLSTKGREIHIDI-MGLTTGVVRGRELYAE--ADLYKNLKAGDEVEATVIDLENENGEMELSFRYAGQQRAWKDLSELSTSGEPIEVKVLDANKGGLIVRVNHVQGFLPVSQLAPEHYPRVAGGDKQKILEKLKGFVGESMRVKVLDVHEDDGKLIVSEKAVWEDE----QKNVIAQCKVGDIIAGDVSAVADFGAFVKFYPTGS------ATPLEGLVHISEIAWQRIDHPRDVLKVG…
>CPR_PB1_Uhrbacteria_GCA_001791065.1
----------MH----------------------------------------------------------I-APVGIF-FMA------NIS-------------------DAS-G-AS----AF----------A-ALLEDP-SAL--RVPSLGDVIKGAIVSASRREVRLDI-GGLTIGVVRGRELFAE--SDDYRNLKPGDAIEATVVDLENENGELELSFRYTGQKKAWEELRGQYAKNEIVEAKVLDANKGGLIVKVGHINGFLPVSQLSPDHYPRVSGGDKQKILDRLKTYVGTAFEVRVLDVNENDEKLIVSEKTVWEER----QRSEISQYKVGGIVKGAVTALADFGAFVKFSASG-----SDASSLEGLVHISEIAWQRIDHPRDVLKVG…
>CPR_PB1_Uhrbacteria_GCA_001004915.1
----------M---------------------------------------------------------------------------------------------------NTQ-A-MS----QM----------E-ELLQSP-AAL--LVPALGEAIEGTVLSADRREVRIDI-RGVMTGVVRGRELFAE--SDEFRTLKTGDTVEATVIDMENENGELELSFRYAGNRKAWEKLREAFTKGENAEVIVKDANKGGLLVTLGHIRGFLPVSQLSPDNYPRVSGGDKQKILEKLKTFVGQKFHVRVLDVNEDDEKLIVSEKALWEEK----QQSKLTQYKVGSMIEGEVTALADFGAFVKF------------DALEGLVHISEIGWQRIDHPKDILKVG…
>CPR_PB1_Uhrbacteria_GCA_000994285.1
----------MV----------------------------------------------------------IAEKRMTT-KKI------IKK-------------------PIK-E-ET----AF----------G-KLLAEG-GYL--KIPKVGDVVKGKIISASRREVRIDI-EGVTAGVIRGRELFAE--SSVYKNLHPGDEVEGTVIDLENENGEMELSFRFAGQQRAWEDLQKLFTGGEVISVTVLEANKGGLIVNVNHITGFLPVSQLSPDHYPRVSGGDKNKILEKLKTYVGEAFTVRVIDANERESKLIVSEKAVWEER----QKDILSRYKVGNMVEGEVTALADFGAFVKF------------DSLEGLVHISEIAWQRIDHPKDLLKVG…
>CPR_PB1_Uhrbacteria_GCA_001001645.1
----------MD------------------FLRL-----LP------------------------L----Y-TICRKT-LMA------FKK-------------------PVD-E-NS----EL----------G-KLLADG-GFL--KIPKVSDVVRGKVLSVSRREVRLDV-EGMTSGVIRGRELFAE--SAFYDNLKPGDEVEATVIELENENGDMELSFRSAGQQKAWDELRRLFTTSEIIPAKVVEANKGGLLMQVGHVTGFLPVSQLSPENYPRVSGGDKNKILEKLRSLVGMSMDVRVIDVNENEEKLIVSEKSVWEER----QKDLISRFRVGDKISGEVTALADFGAFVRF------------DTLEGLVHISEIAWQRIDHPRDLLKVG…
>CPR_PB1_Uhrbacteria_GCA_001791725.1
----------MS----------------------------P------------------------V----H-TAYRNI-LMS------DQD-------------------QTV-A-LT----EF----------Q-KLMEEG-QYL--NVPGLGDAVKGKIISADRREVRVDI-DGLTTGVIRGREIFSE--SAQYDDLNVGDEVEATVIDLENENGEMELSFRFAGQKRAWEELREMFTAGTILDVKITEANKGGLIVRVNHVTGFLPVSQLSPDHYPRVTGGDKNKIFEKLKSYVGATFPVKVIDANEQEEKLIVSEKSVWEER----QKSVIAQYRVGTTIEGEVTALADFGAFVRF------------GSLEGLVHISEIAWQRIDHPRDILKIG…
>CPR_PB1_Uhrbacteria_GCA_001791045.1
----------MA-----------------EALRN----CKP-----------------------------L-SHCRTMHMAD------QGL-------------------VNA-K-AP----EL----------A-KLLEEG-SYL--NIPQVGDVVKGKVISASRREVKVDL-NGVLTGVVRGRELFAE--SSDYANLGKDEQVEATVIDQENENGEIELSFRFAGQKKAWEELKRLFASGEAVEGRIMEANKGGLLVKVGHVTGFLPVSQLSPEHYPRVAGGDKNKILEKLKTYVGTALDVKVIDVNEADEKLIVSEKAVWEEK----QKSVLAKYKVGDRVTGEVTALADFGAFVRF------------DALEGLVHISEIAWQRIDHPRDVLKVG…
>CPR_PB1_Uhrbacteria_GCA_001791695.1
------------------------------------------------------------------------MVCRKF-FMQ------KIQ-------------------EQV-P-QT----EF----------A-KLIAEG-AYL--QFPQLGDIVNGKIISASRREVRVDI-GGMTTGVIRGRELFAE--SSEYANLKPGEGVEATVIDLENENGEMELSFRFAGQRKAWEDLKALFTSGESIPVKVIEANKGGLIVQLNHVTGFLPVSQLSPEHYPRVSGGDKNKILEKLKTYVGQNMNSRIIDVNEEEEKLIVSEKAVWEDK----QKNVIAKYQVGDVIEGEVTAIADFGAFVKF------------DALEGLVHISEIAWQRIDHPKDLLKIG…
>CPR_PB1_Uhrbacteria_GCA_001002565.1
-------------------------------------------------------------------------------MPSA---SFFMT-------------------QAK-E-PS----EL----------A-KLLEEG-SYL--QFPQVGDVINGHVVSSSRREVRVDI-GGFTTGVVRGRELFAE--SEEYTHLQPGEEIQATVVDLENENGEMELSFRFAGQKKAWDELKQLFTSGDIVEARVLEANKGGLLIRLQHVTGFLPVSQLSPENYPRVSGGDKNKILEKLRTFVGQNIKVRVIDVNENEDKLIVSEKAVWEDQ----QKNVIAKYQVGDVVEGEVTAVADFGAFVKF------------EALEGLVHISEIAWQRIDHPRDVLKTG…
>CPR_PB1_Uhrbacteria_GCA_001791715.1
----------MA-----------------------------------------------------R----F-LCARNR-LAE------YFC-------------------MKD-T-QT----EF----------Q-KLMEEG-QYL--NIPKVGDVVTGKIVGSGRREIRIDL-NGIATGVVRGRELFTG--GTEVGDMKAGSEVEATVIELENENGEMELSFRFAGQKKAWEELRRLFTTGETFDVKILEANKGGLIVAVQNITGFLPVSQLSPEHYPRVSGGDKNKILEKLRSYVGSKMNVRVIDVNETEEKLIVSEKTVWEDT----QKNVISKFGVGDTIEGEVTAVADFGAFVKF------------DSLEGLVHISEIAWQRIDHPRDLLKIG…
>CPR_PB1_Uhrbacteria_GCA_000993535.1
MINS------IP------------------------------------------------------------GLGLGR-LPA------YFY-------------------MTQ-P-IS----SF----------E-QLLQEG-NYL--NLPQIGDVVTGVVIGNGRREIRIDI-GGISTGVVRGKELFNE--SSEYANLEPGTQVEATVMERENENGEMELSFRFAGQQKAWEEIRSLFTTGETIETKILEANKGGLIVRVNTVNGFLPVSQLSPEHYPRVSGGDKNKILEKLKSYVGSKMKVRVLDVNEPDEKLIVSEKAVWEDQ----QKNVLSQYKIGDTVEGEVTALADFGAFIKF------------EALEGLVHISEIAWQRIDHPRDLLKIG…
>CPR_PB1_Uhrbacteria_GCA_001791475.1
-----------------------------------------------------------------------------M-TTQ------TEK-------------------QQE-E-SS----VF----------K-TLLQQ--YFK--NAPKTGDVVQGNVLSVSKSEIKVDI-AGLMIGTVRGRELAAG--MQSYTGLKLGDTVEATVIDEENENGEIELSFRAAGFVRAWDQVRELARSQATIEVKVLDANKGGLMITLGPLPGFLPVSQLGPDNYPRVPGGDKNKIVEHIRQFVGKTFRVKVMDVSEKEDKLIVSEKLVWEEE----QKDVLGKYTVGQTIEGTVSALTSFGAFMEF-----------GEGLEGLIHISEIAWQRIDHPRDVLKIG…
>CPR_PB1_Magasanikbacteria_GCA_001001655.1
------MFLFMP---------------------------------------------------------------TLQ-DTD------KDT-------------------SEG-K-KG----SL----------K-QLLTDL-SFV--KVSKKGEILKGCVLSITRAGVKIDI-DGLKTGVVRGPELFQQ--SDEYANLKVGDEVEATVVDPENENGDIELSFRDAGQKNAWKKMTTALQSGEILEMKVADANRGGLMILSDGQRAFLPVSQLNPDHYPRVTGGDKNRILDKLREYVGQTFKVKVIDVNERENKLIVSEKAVWEDT----KKDLLVNYKTGDIVDGVITALTTFGAFISF------------DEVEGLIHISEIAWQRIDHPKDVLKTG…
>CPR_PB1_Magasanikbacteria_GCA_000998685.1
----------M-------------------------------------------------------------------------------------------------------N-------DL----------N-KLLKDEATKN--SSIKEGQEVEGEILNIDKNRIYVDL-SPFGTGMIYKSDLASR--YNSGKDILIGKKIKANIFSLENKDGFIELSFEELNERDASDKIENLRNSKKIVSAKVTSANKGGLMLEFEGLKGFLPSSQLSTEHYPRSSGGDSAEILSKLQDLVGKNLNVRVLNKDKDGQNVVFSEKAAKEND----TKKMLSKYKIDDVVEGKISGVVDFGIFISF-----------DNNLEGLAHISELDWQIIKNPKEFFKVG…
>CPR_PB1_Magasanikbacteria_GCA_000998685.1_2
------------------------------------------------------------------------MTTLKE-EIK------GVM-------------------EDK-K-NN----NF----------K-QLIADA-QFT--KVPKISDLVKGEVLSVSRSLVRINF-PGFRTGVVRGEELY-E--SPDFVNLKPGDEVEATILSLENENGEMELSFKEAGSRKSWEALAGLLKEGKIVQVKIKDANRGGLMVGLDSVSGFLPVSQLNPEHYPRVAGGDKNRILERLKSYIGQMFSVKVLDINEKENKLIVSEKAAWEEE----KRSMLSSYKVGDIVEGTITALTDFGAFVKF------------DEVEGLIHISEIAWQRLDHPKDILKVG…
>CPR_PB1_Magasanikbacteria_GCA_001782975.1
----------MH------------------------------------------------------------LLKSPY-IIH------MSN-------------------VAV-K-TG----AF----------A-KLLDE--QFG--SVPKVDDTLKGHVLSVGRNEVRIDI-DGLRTGVIRGPQLFAE--SAEYRNLKVGDEVEATVIDLENENGELDLSFRTAGHARAWSKLEALRKSGEIVQARIKEANKGGLMVDLDGMDAFLPVSQLSGDHYPRVAGGDKNKILEKLREFVGQDLAVKVIDVNEKDEKLIVSEKSMGDES----KSVATDKYKGGETIEGDVSAITAFGAFVKF------------DGVEGLVHISELAWQRIDHPKDVVHIG…
>CPR_PB1_Magasanikbacteria_GCA_001002365.1
-------------------------------------------------------------------------MVWPL-KAF------FQL-------------------SMT-E-AT----NF----------K-ELLQE--HFV--GLPKVGDAIAGKILSVASNEVRVDI-NGIAVGVVRGKEFYDD--PRRTAALKVGDDVEALVLDLDNENAEVELSFRVAGSMRAWDALRALVDSKETLNVKITEANKGGLLATLNGVVGFLPVSQLSPQNYPRVQGGDKTKILEELRSFVGKEMKVKVLDANERENKLIFSEKNVWEEE----QHEVISAYKVGDIIEGDITAITGFGAFVRF-----------GDGLEGLIHISELAWQRIDHPSDVVAIG…
>CPR_PB1_Magasanikbacteria_GCA_001783215.1
----------M--------------------------------------------------------------------HMS------EEK-------------------DQI-D-PS----DF----------K-ALLSS--YPL--TIPKEGDVVKCRIISIDKGEVHVDI-EGLTVGVVRGRELFAE--SKEYTSLKVGDEVEATVLDLENENGEMELSFRIAGYQRAWNNVKKWMQDNITIKAKVLAANKGGLMMQVEGLDGFMPVSQLNPDHYPRVMGGDKNRILEKLRELMNKELEVKVIDVNEKEEKLIVSEKAVWEDT----QKAVLESYKVGDTVEGEISALTSFGAFVKF-----------GQDLEGLVHISEIAWQRIDHPKDILKVG…
>CPR_PB1_Magasanikbacteria_GCA_001783035.1
--------------------------------------------------------------------------------------------------------------------MT----DF----------K-TLFQS--HVM--HVPKVGDVVKGKVISVDRNEIHIDI-DGMTTGVVRGRELFAE--SSEYASLKKGEEVESTVIDLENENGEMELSFRIAGYAKAWDTMKQWLKDGLTIKTKILSANKGGLMLQVEALHGFMPVSQLSPDNYPRVAGGDKNRILEKLREMVGREMEVKVIDVNEADEKLIVSERAVWEDS----QKAVLESYKIGDVVDGEVSALTSFGAFLKF-----------GQGLEGLVHISEIAWQRIDHPKDVLKVG…
>CPR_PB1_Magasanikbacteria_GCA_001784455.1
--------------------------------------------------------------------------------MT------DAV-------------------KKD-A-KQ----DF----------K-TLLAG--MAI--NVPKVGEVIKGKIISVDRGEVRLDV-EGVTTGVVRGRELFVE--SREYAGLKVGDEAEATVVDLENENGEMELSFRIAGYQRAWDSMKKWMKDSLTIKAKVVSANKGGLMMRVDALSGFMPVSQLSPDHYPRVTGGDKNRILDKLREMTGKEFEVKVIDVDEKEEKLIVSERAVWEDS----QKAVLEAYKINDIVSGEISALTSFGAFVKF-----------GDGLEGLIHISEIAWQRIDHPKDVLKVG…
>CPR_PB1_Magasanikbacteria_GCA_001784435.1
----------MN-------------------------------------------------------------------YMT------LSD-------------------KTS-V-KP----DF----------K-TLLQD--NPI--NFPKVGDLVKGKVLSVDKGEIHVDI-EGLTTGVVRGAELFAE--SREHANLKVGDEVEATVTEMENENGELELSFRIAGFQRAWDAVKKWMKDGLTIKAKITGANKGGLMMQVEALAGFMPVSQLSPENYPRVAGGDKNRIFEKLQELIGTDMEVKVIDADEKDEKLIVSARAVWEDS----QKAVLDSYKVGDTVDGEVSALTSFGAFLKF-----------GEGLEGLVHISEIAWQRIEHPRDLLKVG…
>CPR_PB1_Magasanikbacteria_GCA_001784475.1
----------------------------------------------------------------------------------------MLS-------------------DKV-S-KQ----DF----------K-SILQD--HPI--NVPKVGDIVTGKVLSVDKGEVRIDV-EGVTTGIVRGRELFAE--SREHANLKTGDEVEATVMEMENENGDMELSFRVAGYQRAWDNLRKWAKDCLTIKAKVTGANKGGLIMQVEAMPGFMPVSQLDPEHYPRVTGGDKSRILEKLQELIGKDLEVKVIDADEKEEKLIVSERAVWEDA----QKAVLESYKIGDIVNGEVSALTSFGAFLKF-----------GEGLEGLVHISEIAWQRIEHPRDLLKVG…
>CPR_PB1_Magasanikbacteria_GCA_000990355.1
--------MYMT------------------------------------------------------------VKKDSA-EEK------NPE-------------------LDS-S-KK----SF----------L-ELVKD--FFA--KLPKEGDLVKGKVVSITNGAVRIDI-DGVAVGVVRGKELFGE--SHTYSDLKIGDEVEATVLEQENEMGEMELSFRVAGNKLVWTKMDEYRKDGITINAKVTNANKGGLMMQTDALQGFMPVSQLNPDHYPRVPGGDKNRILEHLKSLVGQNLQVKVIDVNEADNKLIVSEKAVWEDE----QKAVLDSFKVGDIVEGEVSALTSFGAFIKF-----------GENMEGLVHISEIVWQRIDHPKDVLKVG…
>CPR_PB1_Magasanikbacteria_GCA_001783065.1
----------MLSKEGARW-----------------------------------------------------KFNFNM-KDE------KAD-------------------AGQ-N-SN----SF----------A-ALLKN--FFT--KTPQAGDLIKGKVISVESGAVRMDI-EGMITGVVRGPELYTE--SREFSNIKVGDEVEATVLELENENGEMELSFRAAGHRLVWSRMEKYKEDGLTIGAKVTQANRGGLMMQVDSLSGFMPVSQLSPDNYPRVPGGDRNRILEHLQKLIGRELQVKVIDVNDKEEKLIVSEKAVWEDD----QKAVLDSYKVGQMVDGEVSALTSFGAFIKF-----------GEGLEGLVHISEIVWQRIDHPKDVLKVG…
>CPR_PB1_Magasanikbacteria_GCA_000380885.1
M-----------------------------------------------------------------------FNFMTE-DTK------IIA-------------------TAA-D-PQ----EF----------G-ELLKE--YFS--KIPQIGDLVKGRVISIDKGEVRIDI-NGMIVGIVRGAELFTE--SKEFSDVKVGDDVEATVVEEENENGEMELSFRIAGHKIVWNRMGEYVKSGESVKGKIINANKGGLMIKVDALVGFMPVSQLSPDNYPRVPGGDKNRILDHLKKFIGTIIDVKVLDANEADEKLILSEKAVWEDA----QKSILESYKVGDLLDGEISALTPFGAFMRF-----------GDGLEGLIHISEIVWQRIDHPKDILHAG…
>CPR_PB1_Magasanikbacteria_GCA_001782935.1
-----------------------------------------------------------------------------------------MA-------------------NEQ-T-NS----VF----------G-DLLKD--FFG--KVPQIGDLVKGKVISIDRGEIRIDI-EGIMVGVVRGEELYAE--SKDFSNINVGDDVEATVVGGENEYGELELSFRIAGHKMAWDRMAELKKLGTPIIGKVISANKGGLLLMAEAVSGFLPVSQLNPDHYPRVPGGDKNRILDHLRQFVGQEIKVQVYDVNPEEEKLILSEKSLWEND----QKSILDSYKVGDNVEGVVSALTPFGAFMKF-----------GDGLEGLIHISEIVWQRIDHPKDILTVG…
>CPR_PB1_Magasanikbacteria_GCA_001783195.1
----------MS-------------------------------------------------------------------KAA------VFI-------------------LNM-A-EQ----KF----------E-DLLKD--YFA--NIPKVGDLVKGKIISIDKGEVRIDI-NGIIIGVVRGEELFSE--SKEFTHIKAGDEVEATVVEDENENGEMELSFRVAGHRLVWERMAKHVKDGDVITAKILAANKGGLMIQADALVGFMPVSQLNPDNYPRVQGGDKNRIFEHLKKFVGKAIRVKVINADMDEEKLIFSEKEVWEEE----QKNILDAYKVGDAIEGEISALTPFGAFVKF-----------GEGLEGLCHISEIVWQRIDHPKDILKIG…
>CPR_PB1_Magasanikbacteria_GCA_001784405.1
----------------------------------------------------------------------------------------------------------------M-S-NQ----NF----------E-ELLKD--YFA--NIPKVGDLVKGKIISIDKGEVRVDV-AGIIVGVVRGPELFSE--SKQFSDIKVGDEVEATVIEDENENGEMELSFRVAGHRMVWERMAEYVKKGEIVKAKIIAANKGGLMLQSDALVGFMPVSQLNPNNYPRVQGGDKNRILEHLRKFIGTTIKVKVITADMDDEKLIFSEKEVWEEE----QKNVLDSYAVGDIVEGEVSALTSFGAFIKF-----------GTNLEGLVHISEIVWQRISHPREVLKVG…
>CPR_PB1_Magasanikbacteria_GCA_001783045.1
M----VSALLWWHVNQEE--------------------------------------------------------VFMS-NEH------DTI-------------------EGK-N-GS----PF----------G-DLIKK--FFT--KVPNIGDTVVGKVIAVENGEIRIDV-EGLTTGVIRGPELFSE--SKEFSDIALGDEVEATVIDQENEDGEMELSFRIAGHERVWDRMRQYMTDHITLKGKIIQANKGGLMMKVDALTGFMPVSQLSPENYPRVPGGDKNKILEHLKIMIGKEIDVQIIDVNQKEEKLIVSEKAVWEDD----QKSVLESYKIGDVVKGEISALTSFGAFMKF-----------GEGLEGLIHISEIAWQRIDHPRDVLKIG…
>CPR_PB1_Magasanikbacteria_GCA_001782905.1
---------------------------------------------------------------------------MMT-DTT------TEQ-------------------NEK-K-DG----QF----------A-DLLKN--FPA--QTPKTGDVAKGRVISVDSGAVRIDL-GGIAIGIVRGKELFAE--SDQYTNLKVGDEVEATVLEDENEAGEVELSFRSAGNQRVWDRMNQMMRDAVTVPSKVLSANKGGLMMQVDAVAGFLPVSQLNPDHYPRVPGGDKNRILEQLKLLIGKELQVKIIGAMQEEDKLILSEKAVWEDE----QKAVLDAYKIGDVIEGDVSALTSFGGFVRF-----------GEGLEGLIHISEIVWQRIDHPRDVLKVG…
>CPR_PB1_Magasanikbacteria_GCA_001782875.1
-------------------------------------------------------------------------MSKKL-NLS------AKD-------------------EAK-D-NS----EF----------G-KLLKD--YFA--KMPNEGDLVEGSVISVDSSAIRLDI-NGLTTGIVRGHELFTE--SDEFANIKIGDKVEATIIEQENENGEMELSLRSAGNQRVWDRMAELVKDGVTIEAKILDANKGGLMMQVDAIVGFMPVSQLNPDHYPRVPGGDKSRILEKLKKLIGEKVQVKVLDANQKEDKLIVSEKAVWEDE----QKAVLDAFKIGDVVDGEIAALTPFGAFVKF-----------GEGLEGLVHISEIVWQRIDHPKDVLKVG…
>CPR_PB1_Magasanikbacteria_GCA_001784275.1
-------------------------------------------------------------------------------MST------TTK-------------------KQA-Q-TS----DF----------A-ELLKE--HFS--RLPKSGDMIEGTVISVESGAVRVDI-NGLMTGVVRGPELFSE--SSEYANVKVGETVQATVVEQENENGEMELSFRVAGHQRVWDRVLEYKEKSLVVTGKIIQANKGGLMIQIDALTAFMPVSQLAPEHYPRVPGGDKNRILEHLQQLVGQGVQVKVIDANQKENKIIVSEKAVWEDE----QKAVLESYKIGDVVEGEISALTSFGAFLKF-----------GQGLEGLIHISEIVWQRIDHPKDVLKIG…
>CPR_PB1_Magasanikbacteria_GCA_001784205.1
--------------------------------------------------------------------------------------------------------------MKA-E-DN----NF----------G-ELLKQ--YFQ--KLPKVGESVNGKVISLDNGAVRIDI-NGVITGVIRGKELFTE--SAEFSNIKVGEEVQATVLEAENENGEMELSFRAAGHQRVWDKMAEYMKTGITLKAKVLQANKGGLMMQVDALGAFMPVSQLNPDHYPRVPGGDKSRILEHLQHLIGIDMQVKVIDVDQKEEKLIVSEKAVWEDD----QKAVLDSYKIGDAVEGEISALTSFGAFLKF-----------GEGLEGLIHISEIAWQRIDHPKDVLKVG…
>CPR_PB1_Magasanikbacteria_GCA_001871445.1
----------M-------------------------------------------------------------VCSLGSIHTGFVTCIYNMS-------------------DEE-K-KG----SF----------G-DLLKK--FFT--KLPGEGELIKGTVISVDNGAVRIDV-SGVTTGVIRGHELFSE--SDQFSNIHIGDEVEATVVEQENENGEMELSFRAAGHEIVWKRMEELVKNGLTLEGKIVNANKGGLMVQVDALVGFMPVSQLSPENYPRVPGGDKNRILEHLKQHIGKTMQVKVLDANKNNEKLIVSEKAVWEDS----QKAVLDAYKIGDIIEGEVGALTSFGAFIKF-----------GEGLEGLVHISEIAWQRIDHPKDVLKIG…
>CPR_otherPB_Moranbacteria_GCA_016699975.1
M---EPHHMSLKKTLSSLL------SKKKDALTKEAPE---------G-------------------SSSEEEKKGAKKEKPAKIS-LVEE-------------------EMV-D-DS----EM----------G-RLLAQ--NPL--EIPSIGDVLQGTVIEVGSNFALIDL-GPIGTGIVLGKEMKDG--LAGGVKMKFGDKVSATLLSLENDEGSIELSIRAASYEKSWEDIEAKLVNKDVVPTKVLEANKGGLMIEVNGVPGFLPVSQLASDHYPRVEDGDKNKILELLKRLIGLELRVRILDIDRLNEKLIVSEKAARSEK----ERAAISSLSVGDVIEGEVSGVVDFGAFVKFPIPGN-----EKERVEGLVHISELAWQLIDDPRTVVKTG…
>CPR_otherPB_Moranbacteria_GCA_016699795.1
M--------LMSI-----------------------------------------------------------PKFIFQKKVKENES------------------------SSE-S-EN----VF----------T-TMLEN--NGI--HVPLVGDIVEGRVIEKESSALLLDL-GVLGIGIVYGVEMRDG--MGIVNALKIGDPIKAMVVDLDNEDGYIELSVRQASYERAWEDIEEKAKEKASVPTRILDANKGGLLVEVNGVTGFLPVSQLSGEHYPRVDDGDKAKILEMLRRLIGKELMIRVIDWDRQSEKLIVSEKAAQSEK----EMTMISSLKKGDVVEGEVSGVVDFGAFVKFYPSEVDSKQIGDSRLEGLVHISELAWQLIDNPREIVKAG…
>CPR_otherPB_Moranbacteria_GCA_016699425.1
---------MIFSCFSSLL-LC-----------------------F------LRDPPCPTQLLPCRFSTSN-SLRAPRYTPMSNMT--DLK-------------------LKS-N-MT----EL----------E-QLYEA--HSA--AIPDIGDVIPGTVIHVGSSSALVDL-GSLGTGIVLGKEMKDG--LGGGVKLHLGDIVQATLMSYENEDGMIELSIREASYDKSWEDIETKLQKKEVVETKVSDANKGGLMIEVNGIPGFLPVSQLASEHYPRVEDGDKNKILDLLKKLIGETLTVRILDADREGEKLIVSEKAAQSEK----EKEFLNLLHVGDTIEGTVSGVVDFGAFVKFALPGE----HADKRLEGLVHISELAWQLIDDPREIVKTG…
>CPR_otherPB_Moranbacteria_GCA_016699385.1
MKGSRPMFMPLKKTLSSLL------PKKASETSKVAPE-----------------------------KSEE-EKNGVKREKKTSKA--APE-------------------EVV-D-DS----EM----------G-RLIAE--HPF--EVPSIGDVLQGTIIEVGSNFALIDL-GPLGTGTVLGKEMRDG--LAGGVKVKKGDSVSATLIDLENDDGVIELSIREASYDKSWEDIQMKLENKEVVPTKILEANKGGLMIEVNGVPGFLPVSQLGSEHYPRVEDGDKNKILDLLKRLIGQELNVRILDADRINEKLIVSEKAARSEK----ERAAISSLQVGDTVSGEVSGVVDFGAFVKFPIPGN-----EKERVEGLVHISELAWQLIDDPRTVVRTG…
>CPR_otherPB_Moranbacteria_GCA_001784885.1
----------MTRLSTPVL------QMANDILDTLAQE----------------------------------ESAAEKKEIPEKIEALGGE-------------------PIS-Q-TS----VM----------A-DFLNQ--QKI--SFPKEGDVIEGEVIALDSNSIYLDL-GIFGTGIVMGREIKDG--LGATDKIKIGDKVSATVTDLENEDGYIELSIREASIERAWQDLEEKQMNGEVFETKILDANKGGLIVEVNGINGFLPVSQLTNEHYPRVEEGEKSKILEKLRSFIGTEMKVKVLDTDREGEKLIVSEKAAYSDE----EKKAISELKVGDVIEGEVSGVVDFGAFVKFLPPSKLDSIREEDRLEGLVHISELAWQLIDNPREVVKTG…
>CPR_otherPB_Moranbacteria_GCA_000995125.1
----------MT-----------------DILDRLATE----------------------------------PAKTSKKAAAVE------P-------------------ETA-E-MS----VM----------E-QLLAS--EDM--KFPKINDVVEGTVIEVGSNAIYLDI-DPFGTGIVLGREIKDG--MG-SGKLKEGDRVSATIMDLENEDGYIELSVREASYEKAWEDIESKRDTQEKIGTKVLSANKGGLLVEVNGISGFLPVSQLSSKNYPRVDDGDKNKILTLLKKLVGQELNVRILDANRESEKLIVSEKAAQSEK----DRETISNLKVGDVVDGEISGVVDFGVFVKFTQPKSDTEGSEEERLEGLVHISELAWQLIENPRDIAKVG…
>CPR_otherPB_Moranbacteria_GCA_001784805.1
M-------NIMS-----------------DILDNLAKE----------------------------------EVNLNKKNSNKETL--PAD-------------------LPE-D-DS----LM----------S-QLMAK--SSL--KFPEVGDTTSGKVIFVSSNEIYLDL-NPFGTGVVLGKEIKDG--LG-TGKLKIGDTVNATIIDTENEDGYIELSIREASCEKAWDDLESKRDTQEKVFVKVLSANKGGLLAEVNGISGFLPVSQLSSKNYPRVEDGDKNKILNLLKKLIGQELEVRIIDANRESEKLIVSEKAAQSER----DMEVISALNVGDTVSGEISGVVDFGAFLKFSLKEN----EGERKLEGLVHISELAWQLIEDPRTIVKVG…
>CPR_otherPB_Moranbacteria_GCA_001786615.1
-------------------------MIMANILDKLAEE-------------------EAVSGKEEKKPTVK-TAKTKKIQTDED--------------------------EEK-E-KS----EM----------G-KLLEK--NPV--EIPKIGDVISGTVIDIAPTAVLLDL-GPMGTGVVIGREAKDG--LG-TGKLKKGDKVSATLVDFENEDGLIELSIREASHGKAWDDLDSRRDTQEVMTTRVTDANKGGLMVEINGVSGFLPVSQLSSEHYPRVEDGDKNKILAILKNLVGKELKVRIINSDRLAEKLIVSEKAAQSEK----EKAVISELKEGDVIEGEVSGVVDFGAFIKFLPPSKKDSEKDSDKLEGLVHISELAWQLIDNPREIVKVG…
>CPR_otherPB_Moranbacteria_GCA_001003855.1
----------MKKRHLIII-AC---TKKQNILDKLAEE----------------------------------EEGVQKVKKIAT------K-------------------AVS-P-ES----EM----------E-KLLEA--NPV--EIPQVGDVLEGTVVHISSNSILLDL-GPLGTGVVMGKEIKGG--LE-TEKIKIGDKVGATLTDLENEDGLIELSIREASYEKAWDDLEAKVSAGDILSTKVLDANKGGLMVELNGITGFLPVSQLSSEHYPRVEDGDKNKILELLKRIIGQEIQVRILDADRETEKLIVSERAASSEK----EKEVISKLDVGDIVEGEISGVVDFGAFVKFMPPYKTDGQ-ESDKLEGLVHISELAWQLIQNPRDIVKTG…
>CPR_otherPB_Moranbacteria_GCA_000991645.1
----------M----LIII-IC---IKKKDILDKLAEE--------------------------------SIPKKIKKVIAD--------K-------------------NEE-D-LS----PM----------A-VLLEE--NPV--KIPQVGDVLEGVVIDITSNSLLLDL-GALGTGIVLGKEIKDG--LA-IGKVKKGDKVGATLIDLENEDGYIELSIREASYERAWDDLESKRDAMGVVTTKVLDANKGGLMVEVNGITGFVPVSQLSSEHYPRVEDGDKNKILELLKKLVGKEMLVRILDADRTTEKLIVSERAASSEK----EKEVISQLQSGDTIEGEISGVVDFGAFVKFLPPAKMASDRESDKLEGLVHISELAWQLIDDPRTIVKTG…
>CPR_otherPB_Moranbacteria_GCA_000989885.1
----------MK-------------MAKKNILDKLAEE------------------KSKTIKTEKKTTSKK-EEKATKKSVPEKIS--STE-------------------QEE-D-SS----PM----------G-KLLSE--NPI--EIPELGDTLEGNVIEASSSLVLLDL-GAIGTGIVLGKESRDG--MGLSKKLKPGDKISATIIDLENEDGFIELSIREASHEKSWDDLESKRDTQEVLSVKILDANKGGLMVELNGIKGFLPVSQLSSEHYPRVEDGNKNRILELLKAYVGNEFSVKIIDTNREDEKLIVSEKAAMSEK----ERKVISELKIDDIVEGEISGVVDFGAFIKFLPTSKTDSKKDSDKLEGLVHISELAWQLINNPREVIKVG…
>CPR_otherPB_Moranbacteria_GCA_000990175.1
----------MGK------------IMSNNILDNLVDN-----------------------------EAPE-QAPVKKNVFP------------------------------E-D-DS----VM----------G-RLLQN--SNI--DFPEIGDVLDGVVIDISPHSVLLDL-GSFGTGIVYGKDTKDG--LRGNIKLKIGDQVHATLTSLENEEGYIELSIREASYEKAWEDLESKKDNEEAVNTKVLDANKGGLMVEINGIGGFLPVSQLASEHYPRVEDGNKNKILEKLKRLVGQTLLVKIIDTYRDEEKLIVSEKAAMSEK----EQVMISRLKEGDTIEGEVSGVVDFGAFVKFLPTGVKDDSIEGDKLEGLVHISELAWQLIDNPREIIKVG…
>CPR_otherPB_Moranbacteria_GCA_001786575.1
----------MS-----------------LALEKFFSE-------Y------FYTKKLPSSDFPARIIPHA-AAPAATESILFMTK--TIQ-------------------TKE-E-VS----PM----------E-QLLNE--HIV--EIPEIGDVVQGVVIHTGGSSALIDL-GPLGSGIVLGKEMRDG--LGPEGKLKVGTTVSATLMSYENEDGYIELSIREASYEKSWEDIEAKLGAREAVTTKVIDANKGGLMVEINGIPGFLPVSQLSSEHYPRVEDGDKNKILDLLKKLIGQEIVVRILDADRESEKLIVSEKAAQSEK----ERELINLFQVGDVIQGEVSGVVDFGAFVKFSPRTKEGEKERTEKLEGLVHISELAWQLIDDPREMIKTG…
>CPR_otherPB_Moranbacteria_GCA_001784735.1
----------M-RDAVILF-YC-------FVLEKAPLS--------------------------------A-RERLAHPNHIYMIKPLTKE-------------------VIA-N-PT----PM----------D-ELLAK--HVV--EVPEVGDVIHGTVIHVASSSALIDL-GPLGTGIVLGKEMRDG--LGPEGKLKVGTAITATLMDYENEDGYIELSIREASYEKSWDDIEHKLTNREVVTTKVVEANKGGLMIEVNGIMGFLPVSQLSSEHYPRVEDGDKNKILDLLKKLIGAEVHVRILDADRENEKLIVSEKAAQSEK----EREIINLLRVGEVVEGVVSGVVDFGAFVKFAQPAKEGEKKPAEKLEGLVHISELAWQLIDDPREVIKTG…
>CPR_otherPB_Moranbacteria_GCA_001873875.1
----------MTPKMVFFY-IC-------------------------------------------------YSRQGILNFFIFMTKVEAQE-------------------EKT-S-LS----AM----------D-ELFSK--HVI--EVPEVGSVVQGTVIHVASSSALIDL-GSVGTGIVLGKEMRDG--LGPEGKLKVGTTVTATLIDYENEDGYIELSIREASYEKSWDDIEHKLTNREVLTTKVIEANKGGLMIEINGIPGFLPVSQLSSEHYPRVEDGDKNKILDLLKKLIGEEVHVRILDADRENEKLIASEKAAQSEK----ERELINLLRVGEVVSGEVSGVVDFGAFVKFTPATKEGEKKSTEKLEGLVHISELAWQLIDDPRQVIKTG…
>CPR_otherPB_Portnoybacteria_GCA_001819435.1
----------MTNSVMKIG------------------------------------------------ILIS-FILLNTMPTKLI--------------------------NDK-K-IG----LM----------A-TLISR--VDF--VIPKPGDVIEATVVAIKPLMIFLDL-KNFKTGIILGSEIKQN--PQQFKNIKLNDTLTVKIVDLENEDGYTEVSMLEAGEEKKWQFLKEKMDNSEIIEAKVLKANKGGLMMEMENAEAFMPVSQLSSSHYPRVEGANKQKILSELNKLVNQILKIKIIDLDAREKKIIVSEKSAEEKK----LKKALEKYVVGDIVEGIITGVVDFGAFVKF------------DELEGLIHISEIDWQIIDNPADFFKVG…
>CPR_otherPB_Portnoybacteria_GCA_000992445.2
-----MYCSIMGAVKI---------------------------------------------------------------------------------------------FQNP-K-ES----IL----------S-MLLKNNVRQI--PVPQKDALLKGVVLSVDNNKAIIDL-GPTGIGLLIGPEFKGA--IDVLGKFKKGDEISGQVLVIENKEGYIELSVKNAAFQTTWKELENKFIANEPMIVEVAEANKGGLLVKFRGISGFMPVSQLAGNHYPKVEGGDKGKIVQELKKLIKISLNVKIIDLNQKEKKIIFSEKAA-EEK----MQDLSKKYKKGDIVDGVVSGIVNFGIFVQM-----------EKGVEGLVHISELAWQLIENPGDIIKVG…
>CPR_otherPB_Portnoybacteria_GCA_001872305.1
----------MTST----------------------------------------------------FYYVI-LQSMTTSTTTLTQDMTGIA-------------------GKN-N-DK----KI----------E-GLI---SQGP--QMPQAGQSLTGHVLKIGKSAILIDL-GPIGIATILGREIQEN--PESFRNLKVNDEALVKVIAPENEKGFIEVSLMAADKESNWDKLIQYMKNGDILDAIVLKANRGGLLMEINKVQGFMPASQLNQEHYPKVANGDKNEIMRQLQILVNKKLKIKIIDVDPQEQKLIVSEKALEQDK----IKKVLTNYQVGETVEGTITNLAAFGAFIQFKTDKL---PNEEQNIEGLIHVSEMDWLPVSDPGQLLKVG…
>CPR_otherPB_Portnoybacteria_GCA_001872495.1
----------MLKHDWPYQ--C--------------------------------------------FILSY-FQGLAKLKILRYTCCMTKK-------------------ETN-K-TS----KM----------K-ELLAKEKKIV--SLPQPGDIIEGTIIKVSKTEIVVEI-DSIGAGVVYGGEIKEN--RTLVKGLKVGQKISALVIGPENEDGYIELSFKEANLKKIWNDLRETKENNETISVRVIEANRGGLVIEYSGIVGFLPVSQLSPQNYPRVEGGDKNKILKHLNIFVGKEMLVKIITLDKRDEKLIVSEKLAREKE----LKKNLEKYKEGDIVEGTVTALADFGAFIKF-----------GDNLEGLAHISELAWEIIDHPSQIIKEN…
>CPR_otherPB_Portnoybacteria_GCA_001819555.1
----------M-------------------------------------------------------------LRYITNMKKAKSQFLPSLK-------------------KES-N-LK----AM----------K-ELLAKGEAAP--QLPQAGELIDGRIIELSKHSLILDL-GASGTGIVYGAELKEN--KELLKGLKINDIVSVLVLDPENEDGYVELSLKEANQEKAWQKLKEQKQSQEIIKAKIIGANRGGLVVDIRGLDGFLPVSQLSDQKYPQIAGGDKNKILSHLNKFINQEIKVKIISLNQNSQQIIVSEKATE----------------------------------------------------------------------------…
>CPR_otherPB_Portnoybacteria_GCA_001819605.1
----------M-------------------------------------------------------------LSSLAKW-------YYTAM-------------------NKN-Q-SQ----NM----------K-DLLAKQNEIP--HLPQIGELVEGQIMEMSKNSLILDL-GPLGTGIVYGGELKEN--KGLLKGLKIGDTVSALVLDSENEDGYIELSLKEANLEKSWQAAKEKKQTQKVVVVKVVEANRGGLVITFNGLVGFLPVSQLSDKNYPQVEGGDKDKILSHLNKFINQELKVRIIGLDQNKKQLIVSEKAVE----------------------------------------------------------------------------…
>CPR_otherPB_Portnoybacteria_GCA_001873495.1
----------MVEFYILGM-----------------------------------------------------------------------K-------------------KDN-Q-QQ----PMA---------K-DLL----ASI--NTIKESQILEGKIIEANKSNIFIDF-GALGTGIVLGREIKDN--PSLVKELKVGQTISCVVLESENENGYIEVSIKEADRELSWTKLEELKNTSRNALAKVIQANRGGLLVSLLDQKGFLPASQLSPEHYPRVDGGDKEKILKELNKFVGKDLKVKVIDLDPREEKLIVSEKALNKEE----VEEIMKYFALDGVFEGTVSAVTDFGAFVRLSPEEG----AKAPETEGLIHISELDWQLVRDPREILQEG…
>CPR_otherPB_Portnoybacteria_GCA_000997475.1
----------MP------------------------------------------------------------------------FIMPVKN-------------------ETD-K-KS----LM----------A-GLLAQ---AP--KLSKPGDIIQGKILEVGKNTVFIDL-GSLGTGVLLGREVKEN--RNLVKSLKKGDEISAMVIEDENEKGFVELSLQAAHREQAWDTLKQLLESHQTVKAKIVSANRGGLMADIKGTVGFLPVSQLNYEHYPRVEDGDKSKILQELNKFVNKELDVRVIDADQSQQKLIVSEKAVDEEK----VRQALSKFQIGDLVEGMISGVVDFGAFVRFPMRENE---PNAEMMEGLIHISEIDWQLIEDPRQILKVG…
>CPR_otherPB_Portnoybacteria_GCA_001819635.1
------------------------------------------------------------------------MGCMPKSKVKAA--------------------------VEP-K-KS----AM----------T-GLLAQ---SP--KTPKVGEIVSGKVLEVGRSKVFIDL-GAAGTGVLLGREVKEN--RALIKSLKPGDAISAMALELENENGFIELSLQAAHREQSWDVLRKMFASQEIVKAKVTAANRGGLMVEVGGVAGFLPVSQLSHEHYPRVEDGDKNKILQELNKFVNKELDTRILDVDPGQQKLIVSEKAVGEEK----VRQALSQYQIGDMVDGTISGVVDFGAFVRFPLKDTL---AKQEMMEGLIHISEIDWQLIEDPRQILHAG…
>CPR_otherPB_Portnoybacteria_GCA_001872385.1
----------M---------PC------------------------------------------------F-ILSWKRLNTKNSCNANNRK-------------------KIE-T-DT----TM----------N-NLLLK---SP--VLPKQNQIVSGTVIEIGKNTVFLDL-GPFGTGVILGREIKEN--QQVIKILKPGEQIHAMVVELENDDGFVELSLKAANKQNTWEQLNELMQKQEAISTKITKANKGGLMVEIKGVPGFLPVSQLSYEHYPRIEDADKMKILNELNKFVGKELTVRIIDLNQEQQKLIVSEKALQESR----LKETLKNFQVGDLIQGVISGVVDFGAFVRISIPNAQPEFEKSEIIEGLIHISEIDWQLIEDPREFLKVG…
>CPR_otherPB_Azambacteria_GCA_001002715.1
----------MTSRCCICY------------------------------------------------SVIY-MNEIEQIQTLIN--------------------------GEQ-K-KS----DM----------A-VLLRDEPNFT--AVLKVGGLIEGAIIEKTSKAVHIDL-GLLGTGIIYGRELMDA--YEILKKSKPGDKILGKIVELENEDGYVELSLKEASRQRVWDQLREKQKSQEIIVVKISEANRGGLVAPISGIKAFLPVSQLAPKHYPRIEGGDKEKILVELNKLVGQELKVKILDMFPEEEKLIISEKEVKNGE----MTEVLKHFKVGDIVEGEVAGVVDFGAFVKLPAPFQ-DGSSATESLEGLIHISELDYKLIENPQEVIKVG…
>CPR_otherPB_Azambacteria_GCA_000993645.1
M---------MND-----------------------------------------------------------------------------KIN--------------LIANDK-S-RS----SM----------D-KFFKN-QGTC--PIPHIGDTLEGKVINKLSNMILVDL-GPFKTGTVFGREFISA--QNYIKSLSVGDSISVKILEIDGYQGYIELSIHDTLQEDLWNSFESSLRENKIVKVKIQKANRGGLIATVNGVQAFLPVSQLKNSHYPRVEGGDKQKILDELNKFVGQEFDVKIITADKANKHLIISEKDIPDEA----FTKIISLCNVGDVVDGTISSVVDFGVFITFSPVGA---PLGAPKLEGLAHISELDWQLIENPADLFKVG…
>CPR_otherPB_Azambacteria_GCA_000992485.1
----------MD--------------------------------------------------------------------------------------------------NSS-P-K-----LM----------E-EALKN-ILPA--QLPKVGELIDGAILGKKGSCLYINL-GAFGIGVIYGKEYYEA--QDLIKGVKIGDKVSAKVLELQNDDGYVELSLKEAGQEMAWDELRKIKESGEIISVKITEANRGGIMAQVKGVPAFMPVSQLSVKNYPRIEGGDKTKILQELNKFIGKNMNVKVIDIDQKESKLIISERGVQDED----LKGVLDNFKVGDIIEGEISGVVDFGAFVKIEVPGEK---EDIPQIEGLVHISELDWQLIEDPKQVVKIG…
>CPR_otherPB_Azambacteria_GCA_001774085.1
-------------------------------------------------------------------------MIINRMQTNTQ--PPQQQ-------------------NQK-M-KS----LM----------E-DVLKA--DFS--MAPKVGEVMSGTVIKKENATLYVDF-GALGTGIIYGREFREA--LDIIRHMKPGDPISAKVVELENEKGFIELSLKEAGYTLAWDDLIAKMQKGEIVEVTIREANKGGLMADLNNMMAFLPVSQLSTKNYPRVDGGDKQKIYQELMKFVGTKFNVKVIDVNQQEGKLIISEKEAQDND----FKKLIEAFKVGDIVDGEVSGVVNFGAFIKFKTKDQE----QT-DLEGLAHISELDWQLIENPSDVVKVG…
>CPR_otherPB_Azambacteria_GCA_001773975.1
----------MS-------------------------------RDI--------------------------TYIMEDIKGKASGAASAPQ-------------------NQK-V-KT----LM----------D-EALKI--SFA--KLPKVGDVIMGTVANKESATLYVDF-GAMGMGIVFGREFREA--GEVIKRMQLGEQISAKVVDLENDRGFIELSLKEAGYTLAWDDLIKKRDSGEIFEVEIREANKGGLMAEVNNVIAFMPVSQLATKHYPRVDGGDKGKILAELAKFVGEKFKVKILDVNQEEEKLIISEKEAQDDD----LKKVLSAYTVGDIIEGEVSGIVNFGVFVKFAPPAVE---VHIGELEGLAHISELDWQLIENPADMFTVG…
>CPR_otherPB_Azambacteria_GCA_001774135.1
MLFYIFDFTIMTVQTPVLE-----------------------------------------------------KKMMDRVSSRSAEGATVAL-------------------GRP-A-SN----VM----------E-RLFESAPDNF--PLPKVGDIVEGRVIKKSARNLYIDL-SRLGTGIVYGREFIEA--QDMIKGLKPGDTVFTKITDFNNENNFIELSLMAAQSQKTWDILKGLQRNAEIISTKILDANRGGLIVEVQGVQGFLPVSQLNAEHYPRVEGGDKNKILGELQKFIGQSFSVRILDLDPKENKLIVSEKAAVKEE----LKKAISSYKIGDTVDGEISGIVDWGVFIKWPAP-------SSENLEGLVHISELDWQLIENPADFVKVG…
>CPR_otherPB_Azambacteria_GCA_000995795.1
---------------------------------------------------------------------------MEAQAGILN--------------------------------------KM----------Q-ELMAKMPQVF--NAPKAGDVVEGLVVKKSARTIYFDL-GIWGMGIVYGIEFTNA--QSIVKKLKVGDAISVKIVEIENEEGLRELSLAEAQSQKSWDLIKELKRTNKVFSTKILSVNRGGLMVEISGVTGFLPVSQLSNEHYPRVEGGDKNKILEELSKFINQDFSVRVLDFNAKENKLIVSEKAAEEEH----FKQALGKHQVGDVVAGAISGIVDWGAFIKWPS--------GDDTLEGLIHISELGWQLIENPADFVKVG…
>CPR_otherPB_Azambacteria_GCA_000998395.1
-------------------------------------------------------------------------MMIETQSNVLN---------------------------------------M----------Q-TLAMKLPKAF--NAPKSGDVIEGRVIKKNARNLYVDL-GIWGIGIVYGIEFTNA--QSIIKNLKIGDSIFAKISEIENEDGLRELSLAEAQSQKSWDLIRELKKTNKVVAVKILNVNRGGLMIEISGVAGFLPVSQLSSEHYPRVEGGDKNKILEELSKFVGEDFKVRVLDFDIKENKLIVSEKAADEEH----LKEAVGRHQVGDIVAGTISGIVDWGAFIKWPAGE--------NALEGLIHISELDWQLIENPADFVKVG…
>CPR_otherPB_Azambacteria_GCA_001775785.1
----------MNTV------------------------------------------------------------------------------------------------------EN----IM----------Q-NLALKMPKAF--DWPKVGEVIEGRVMKKSAKNLYIDL-GIWGIGIVYGIEFINA--QDIIKNLKIGSQVFAKIVEVQNESGFRELSLAEAKAQKSWDLIRELKKTNQAVTTKILSVNRGGLIVEISGIAGFLPVSQLASEHYPRVEGGDKNKILEELSKFVGLEFKIRVLDFDVKENKLIVSEKAAEEEH----LKRAIERYKIGDIINGSVSGVVDWGVFVKWPACQPLGGAMEEEMLEGLIHISELDWQLVENPSDLVKVG…
>CPR_otherPB_Yanofskybacteria_GCA_000397985.1
------------------------------------------------------------------------------MENEPN--NLAVA-------------------TPK-D-SA----AM----------K-DLLQEKGNLF--VFPKAGDTVAARVIEKGRNRVFVDI-KAFRTGVIYKGEMETS--NLNIQDIKPGDMLMVKIVDLENKEGFVEVSLNEVGLDKAWDEVRALKTSGETAEVKITGANRGGLTAVLNGLAAFLPASQLASGNYPHVEGGDKEEILKSLKKLVGQSVTVKIIDFDQKISKIILSEKAQVSKE----TETKLTGYALGDIISGEISGLVDFGAFVMF------------NGIEGLIHISEIGWQLVEKPSDFIKIG…
>CPR_otherPB_Yanofskybacteria_GCA_001824315.1
--------------------------------------------------------------------------MKILMEQLISPQ--ETN-------------------GLN-T-KK----LM----------K-ELLSK--FNF--SLPKKGSVLDGEIINISLLSILIDL-GSFGAGIVYPREFYDD--PEKQKNLKLGQKVKIVLLNLENEEGLRELSLKRAQMKSAWQEVKEIYEKEEIITVKIANLNKGGLISEVRGIQAFMPLSQLAEEHYPKVENGNTQEIVRILQTYRNQEFKVKIIDADESQNKLIISEKAAKQTL----EKEKSVQYSIGDVIEGEITETTDFGAFIKL-----------PDGTEALIPKSEIGED--KNMEEVLKVG…
>CPR_otherPB_Yanofskybacteria_GCA_001794195.1
----------ME---------------------------------------------------------------------------VSAQ-------------------ING-T-EI----SM----------K-DLLAK--FSF--DLPKAGEVITGEIISVSKNAVMVDL-GSLGTGIVYPGEFYDN--PSVQKTLKPGQAISAILLDIENDDGFRELSLKRAQMTTAWEDIRQKRDSGEVITTKVININKGGLIVEVSGIQGFLPLSQLSPEHYPKVEGGDTTKIVQVLQKMRNQDIQIKILDFSEDENRLIVSERAISEAH----LKEELAKFKIGDIVDAEVTEVTDFGAFASISAPTEQDAVKINSTIEGLIHISEIDWKLVENPRDFLQTG…
>CPR_otherPB_Yanofskybacteria_GCA_001794605.1
--------------------------------------------------------------------------MTNQLDNSINVA---NT-------------------SGA-E-VV----SM----------K-EILAQ--YEP--LFPRLGEVLSGTVISATHNSILVDL-GTLGTGIIYPSEFYDN--PGLLKTLAPSETIPVILLDVEDENGYRVLSLKRAQITSAWESIYQKKESGEIIAVTIMNINKGGLIVELHGIQGFLPLSQLAPAHYPKIQGGDTTQIVQTLQKFRGQVFNIKIIDCSEEEGKLIVSERATLNDQ----LKAELSKFTLDQVVEGEITDITEFGAFIRL-----------TDDLEGLIHISEIDWKLVENPRDYLKVG…
>CPR_otherPB_Yanofskybacteria_GCA_001795745.1
---------MMENI--------------------------------------------------------V-LASTNPADPATMVA--GNT-------------------MNP-EQLY----GM----------K-EILAQ--YET--SLPKQGDVLAGEVISVSKKGVLVDL-GLLGTGIIYPSEFYDN--PTLQKSLKKGDGISVILLELENDEGYRDLSLKQAQMTTAWEEIREKREKGETLSTPILNINKGGLIVEINGIQGFLPLSQLGPEHYPKIEGGDTAKIVQALQKFRGQNFDVKILDFSEAEGKLIVSERAIMADK----LREEIAKYKIGEVIEGTITEITDFGAFVKI-----------TENAEGLIHISEIDWKIIDNPRNHLATG…
>CPR_otherPB_Yanofskybacteria_GCA_001795795.1
----------MT------------------------------------------------------------CYFVYSKTLMSAPI---QT-------------------QPA-D-IL----SM----------K-DLLAK--EEF--HLPKVGQIVSGEIVSVSKSSVMVDL-GSMGIGVVYPGEFYDN--PERMKALQPGEKVSAMLLELENDQGYRELSLRAAQMTTAWQDIKEKKEKGEIIKTSIVNINKGGLIVEVNGVQGFLPLSQLSAEHYPKIEGGDTAKIVQALQKFKGQELEVRILDFSETEGKLIVSERAIREEA----AQEELAKLNVGDIVECGVTEVTDFGAFVKL-----------STTLDGLIHYSEIDWKFVENPREYLHTG…
>CPR_otherPB_Yanofskybacteria_GCA_001794715.1
----------MS--------------------------------------------------------------AIKKCLMSRNIF---KM-------------------NIV-G-VK----SM----------K-DLLSK--EEF--FLPKPGNILSGEIISISKSSVFVDL-GPVGIGIIYPGEFYDN--PDRMKSLKSGERVSAMLLELENDDGYRELSLKAAQITTAWQDIKDKKESGEVITTRIININKGGLIVELSGIQGFLPLSQLSAEHYPKVEGGDTTKIVQALQKFKGLDFKVKILDFSEAENKLIVSEKAIQEEA----VKEEIAKLNVGDVVDGEITEVTDFGAFVKI-----------SDTLDGLIHSSEIDWKFIEDPREILHAG…
>CPR_otherPB_Yanofskybacteria_GCA_001794205.1
---------------------------------------------------------------------------MMTEAQTMP--------------------------------IK----SM----------K-DLLSR--EEF--FLPKPGNILSGQIISVSKDSVFVDL-GPIGIGIVYPGEFYDN--PDRMKTFKSGDKISAMLIELENDDGYRELSLRAAQMTTAWQDIKEKKENGEIVPVTVININKGGLIVEVSGVQGFLPLSQLSAEHYPKVGGGDTGKIVQALQKFKNQELKVKIIDFSEAENKLIVSERAIQEES----LKEELAKLKVGDTVEGEITEVTDFGAFIRM-----------GNGLDGLIHSSEIDWKFVENPREILHSG…
>CPR_otherPB_Yanofskybacteria_GCA_001794675.1
----------M------------------------------------------------------------------TDARQISSM---QI-------------------NNS-D-IK----SM----------K-DLLFK--EEF--FLPKPGNILSGQIINISKANVVVDL-GHIGIGIVYPGEFYDN--PDRMKGLKPGDKVSAMLIELENDDGYRELSLRSAQMTTAWQDIKEKMDASEVITTKIVNINKGGLIVEVSGIQGFLPLSQLSSEHYPKIDGGDTTKIVQALQKFKGMEFQVKILDFNETENKLIVSEKAIKEEA----AKEELSKLKVGDLIEGKITEVTDFGAFVKL-----------SDTLDGLIHSSEIDWKFIEDPREVLHSG…
>CPR_otherPB_Yanofskybacteria_GCA_001794525.1
-------------------------------------------------------------------------------MDARYHM---QI-------------------SNS-D-IK----TM----------K-DLLSK--EEF--FLPKPGNILSGIVIGVSKANVIVDL-GSIGIGIVYPGEFYDN--PDRMKTLRAGDQVSAMLIELENDEGYRELSLKAAQVTTAWQDIKEKKESGEVLTTQIVNINKGGLIVEVSGIQGFLPLSQLSSEHYPKVEGGDTTKIVQALQKFKGQLFQVKILDFNEAENKLIVSERAIQEEA----AKEELSKLTIGETVEGVVTEVTDFGAFVKL-----------TDTLDGLIHSSEIDWKFIEDPREVLKPG…
>CPR_otherPB_Yanofskybacteria_GCA_001795695.1
----------MGRTFTTWL---------------------------------------------EISMAAL-VQKAVPGMSRINIV---EL-------------------NSS-E-VKSTLGSM----------K-DLLLK--EEF--FLPKPGNIIAGTVIAISKASVIVDL-GSIGIGIVYPGEFYDN--PDRMKTLGPGDQVSAMLIELENEDGYRELSLKSAQTTTAWQDIKEKKDKGEILEVPIININKGGLIVEVSGIQGFLPLSQLSAEHYPKVDGGDTTKIVQALQKFKGQSLKVKILDSNEQENKLILSERAIQEEA----TKEELAKLQVGQIVEGVITEVTDFGAFVKL-----------SDTLDALIHSSEIDWRFIDNPRDILHPG…
>CPR_otherPB_Yanofskybacteria_GCA_001795615.1
----------M------------------------------------------------------------------------------EI-------------------VQN-G-IK----SM----------K-DLLAK--EEF--YLPKAGSILQGQVINISKSSVIVDL-GSAGIGIVYPGEFYDN--PERMRSLKRGDTVSTMLIELENEDGYRELSLRAAQMTTAWQDIKEKMDKDEVVTTTIVNINKGGLIVELSGVQGFLPLSQLSSEHYPKVEGGDITKIVQALQKFKGQEFKVKIIDFSESENRLIVSEKAISEDL----AKEELKKLTVGEIIEGEITEVTDFGAFVKL-----------NDSLDALIHSSEIDWKFIEDPREILHTG…
>CPR_otherPB_Yanofskybacteria_GCA_001794455.1
----------M----------------------------------------------------------------------LLKHM---NL-------------------TES-P-IK----SM----------K-ELLAK--EEF--YLPKPGTILRGQIISISKSSAIIDL-GPAGIGIVYPGEFYDN--PERMRVLNPDDIVSAMLIELENEDGYRELSLRSAQMTTAWQDIKEKLDKEEVISTTVININKGGLIVEVSGIQGFLPLSQLSPEHYPKVEGGDTTKIVQALQKFKGQELKVKIIDFSETENKLIVSEKAILEDL----AKEELKNLNVGETVEGEITEVTDFGAFVRL-----------SDNLDALIHSSEIDWKFIEDPREILHIG…
>CPR_otherPB_Yanofskybacteria_GCA_001794335.1
----------MA-------------------INHNARLYTS-----------------------KIGFVQI-IAFCFTFIYNLNTM---NI-------------------GLN-G-TK----TM----------K-DLLSK--EEF--FLPKPGSILNGQVISISKGSAIIDL-GSAGIGVVYPGEFYDN--PDRMKTLKSGDKISAMLLELENEDGYRELSLKAAQITTAWQDIKEKKESGEIITTQIININKGGLIVEVGGIQGFLPLSQLAGEHYPKVEGGDTTKIVQALQKFKGQDFKVRIIDYSETEGKLIVSEKAIQDEA----LKEELAKLKVGDVIEGKITEVTDFGAFVKL-----------NDALDGLIHSSEIDWRFIEDPREILHPG…
>CPR_otherPB_Yanofskybacteria_GCA_001794215.1
----------------------------------------------------------------------------MLCITSFGMN---IT-------------------PQT-A-VK----SM----------K-DLLSR--EEF--DLPKTGQILSGKIISVSKNNIFIDL-DSAGIGIVYPGQFYDN--PERTKALKPGEKVSTILMEVENDEGYRELSLKAAQLTTAWQDIKEKKENGEIIPTTIININKGGLIVEISGVQGFLPLSQLSAEHYPKVDGGDTTKIVQALQKFKGQEFSVKILDFSEEENKLIVSERAIREET----AKEELAKLKVGELVEGEVVEVTDFGAFVKL-----------SDSLDALIHSSEIDWKFIENPRDILRVG…
>CPR_otherPB_Yanofskybacteria_GCA_001794375.1
----------MS---FILGSPSLLSILKQECPNQVIVICYS-----------------------SIKYLQF-NRLSCIFLFTMNLA---TI-------------------PAN-S-IK----SM----------K-DLLSR--EGF--DLPKAGQIIQGEVINISKSSAIIDL-GSIGIGIVYPGQFYDN--PDRMKSLKKGDRISAMLVELENEDGYRELSLKAAQLTTAWEDIRLKMEGGELVTTTIANINKGGLIVEVSGIQGFLPLSQLSSEHYPKVEGGDTTKIVQALQKFKGQQFTVKILDFNEAENKLIVSERAIKEGA----AKEELAKLKVGDEIEGEITEVTDFGAFVRL-----------SDSLDALIHSSEIDWKFIENPKDILHAG…
>CPR_otherPB_Yanofskybacteria_GCA_001794285.1
----------MSETLALFGARQKVSRLLWRAPNKDKVKDLS-----------------------LVIFLHL-TWLSSILLTTMQTI---TM-------------------DNS-Q-IK----SM----------K-DLLAK--EDF--GLPKAGQLLQGEIINISKSNVFIDL-GPIGIGIVYPGQFYDN--PDRMKGLKKGGHVSVMLIELENDEGYRELSLKAAQLTTAWEDIREKMEKGELVNTTIVNINKGGLIVELSGIQGFLPLSQLSGEHYPKVEGGDTTKIVQALQKFKGQEFKVKIIDFNEAENKLIVSERAIKEEA----AKEELAKLTVGQIIDGEITEVTDFGAFVRL-----------SDTLDALIHSSEIDWKFVDNPKDILKAG…
>CPR_otherPB_Yanofskybacteria_GCA_001794015.1
----------MSKCKITIK-HFTLSFLILR------FTNNN-----------------------PVLFFQY--------MTIATAP---IS-------------------TIS-Q-IK----SM----------K-DLLIK--EGF--DLPKAGQIVQGEVINISKSAVFIDL-GPIGIGIVYPGQFYDN--PDRMKSIKKGDKVSTMLIELENEDGYRELSLKAAQLTTAWQDIQEKMEKGELITTLIININKGGLIVEVNGIQGFLPLSQLSSEHYPKVDGGDITKIVQSLQKFKGQEFTVKIIDFNESENKLIVSERAIKEAA----AKEELVKLNVGDEVEGEITEVTDFGAFVRL-----------NNSLDALIHSSEIDWKFIDNPKDVLRIG…
>CPR_PB2_Terrybacteria_GCA_001822905.1
----------MDLLNK---------------------------------------------------LTSA-FNASDKLEKEDDSATDTPK-------------------HTR-N-ND----VL----------K-SMLNN---QP--APLKTGDVATGTLIGRGVATIFVDL-GAKGTGIIFGREFYQA--QDLLRGINKGDNISGKVVDPDNDDGYVELSVKDAGREMVWQRLDEHKKLGTNLKVKITAANRGGLVAQVEGMQAFLPVSQLSATHYPRVEGGDKDKIYGELQKFVGQEFEVQILDFSPQEQKLILSEKAVEKTE----LSGLLKDYKVGDMVEGTVSGIVDFGIFLRF---------GPDDRLEGLAHISELDWQMVQDPGSLFGVG…
>CPR_PB2_Terrybacteria_GCA_001822895.1
----------MDLLNK---------------------------------------------------LASA-LNPSDQNEDEDSEGPETTA-------------------KSK-EAAD----AL----------K-AVLN---SQA--PPLKTGDMVNGKVIGRGVATVFIDL-GAQGTGIIFGREFYKA--QDIIRGINKEDVISAKVVEPENDEGYVELSVKDAGREMVWQKLEEYKTSGITLKVKITAANRGGLVAQVEGTQAFLPVSQLSAAHYPRVEGGDKDKIYGELQKFVGQEFEIQVLDFAPQEQKLILSEKAVERSE----LSELLKDYKVGDTIGGTVSGVVDFGIFVRF---------GPEDRLEGLAHISELDWQMVQNPNSLFSVG…
>CPR_PB2_Terrybacteria_GCA_001822935.1
----------MK--------------------------HTP------------------------------ENAGVRKERRKMEIPPTTQS-------------------SDE-S-SE----GL----------T-QLFNE--ATA--LLPKIGEIVEGTVVARGTASIFVDL-GPRGTGVIFGKEFYAA--QEALKDYAIGNMIVAKVVDTENQEGLIELSIAEAGKELAWSHIKETHRNGSIFSTTIKSANRGGLVADVEGTAAFLPASQLGFDHYPHVEGGDKEKILEELRKLIGQQLRVKILDINPKEEKVILSERAAELDE----LQEELNQFHVGDVVEGNISRIADFGIFVRF---------GPDEKLEGLVHTSELDWTPVPDFQQHYKVG…
>CPR_PB2_Terrybacteria_GCA_001824745.1
-------------------------------------------------------------------------MSMERQENETVAP----A-------------------LDS-A-AH----PL----------D-AILKA--DSP--QLPREGDIVEGPVISRGTAAVLVDL-GPQGTGIVYGREFFMA--RDILRDKRVGDRVSAKVIDPENADGYVELSAVAAGRELAWGRLQKFSDEKETIKATVESANRGGLVVNVEGIKAFLPVSQLAPEHYPHVEGGDKEKILEALRAFVGQPLSAKILNLDPQRDKLILSERAVFEEE----LREELKNFHVGDIVEGRVAGIVDFGLFVRFGP---------DERLEGLMHVSEVSREPVQHIRERFTIG…
>CPR_PB2_Terrybacteria_GCA_000993875.1
----------M-------------------------------------------------------------TTITESP-------GEKQT-------------------IIG-R-QS----FM----------E-TLMKN--TPI--VVPKVDDLVDGIVIGLQASTLYVDL-APLGTGIIYGREYNRA--KDIIRSLKSGDKIAVKMIEPENERGYMTLSLKEAKEEIVWREAEEMQKTKAPITLAVKEANKGGLVLEWNGIPGFLPTSQLKSEHYPRVDDGDKDKIETELKKLVGEKLKVTVISSNQKEKKLIFSEKGNDMEE----IKEIVSKYKVGDIVEGEITGVVDFGVFIKI-----------DQNLEGLAHISELDWVLIDNPASKFKVG…
>CPR_PB2_Terrybacteria_GCA_000999975.1
---------MM-------------------------------------------------------------TTATAQ---------KEKT-------------------ILPAH-LG----IM----------D-ILMKM--ALL--PVPKVDELIEGTVLGQERSVLFVDL-SPVGTGIIYGREYNRA--KDIIRALVPGDKITVKIAELENERGYFSLSLKEAKQKMVWKEAEDLQKTKTPLTLSVIDANKGGLVMEWNGVQGFLPTSQLKSSHYPRVQDGNKDKIEEELKKLKGEKLKVTIIASDQKENKLIFSEKNSDMEE----IKDMISKYKIGDIVEGDVTGMVDFGIFIKI-----------DDNLEGLAHISELDWSLIEKPANHFKVG…
>CPR_PB2_Spechtbacteria_GCA_001819985.1
----------MA--------------------------------------------------------------------------AQIAE-------------------KTK-G-NT----AM----------K-DVMEEERGLF--RFPKQGDMVEGVIIAKLGNAVYVDL-GMAGTGIIYGREYYEA--QSELKGKNVGDALSAKVVEFENENGLRELSMSAAGKENNWQKLERMRDTKELIEVKIKAANRGGLIIEKDGVEGFMPVSQLSPNNYPRVEGGDKEKILRELQKFVNKTTEVRILDVDQRQRKFIVSEKAGEEEA----IKKALEKYKVGDTVEGEITGVVEFGAFIRL-----------DPLVEGLIHISELDWQLVERPQNVVTIG…
>CPR_PB2_Spechtbacteria_GCA_001820035.1
----------MA----------------------------------------------------------FNLSSMEKTATKTKTRIKTD--------------------VRD-S-KN----IM----------K-EVLYADRSLF--QLPHVGDIVEGKVIGKESGVLYLDL-GPTGTGVIYGVEYYAV--QDIIKNLKPGDAVAAKLIEFENKDGYRELSLKEAGEEKKWREIKEKKQIQELIDVKITDANRGGLIAKYGDIEGFIPVSQLSLQNYPRVEGGDKERILDELKKFIGSTMRVSILDLNSSENKLIFSERAAEGDM----IKKALGKYKVGDTVEGEITGIVDFGAFIKF-----------DELLEGLIHISELDWNLVKNPGEVVKIG…
>CPR_PB2_Spechtbacteria_GCA_001820055.1
----------M-------------------------------------------------------------LDITTKQSSLPTSNAGLPT-------------------GQA-G-KN----AM----------K-SVVQTDKSLF--QLPKKGDVVEGKIIDKEGGVLYIDL-GHIGTGVVYGAEYLKA--QDEIKKLKPGDELTAKVIEVENEDGYRELSLKEAKQEKNWQHIQESQRNKKIIEIEITDANKGGLMGVVGDVSGFLPVSQLAPAHYPRVEGGDKNKILQELRGFIGKKMQVQILDADQKENKLIFSEKAAGSES----VQIALGKYKIGDEVEGEITGVVDFGAFIKF-----------DPLLEGLIHISELDWSLIEDPHDIVKVG…
>CPR_PB2_Spechtbacteria_GCA_001821885.1
M---NVKIDNM-------------------------------------------------------------PNTITKQSDKPNVN-------------------------QV-E-KN----IM----------K-TAVQAEKSLF--QLPKIGDVVEGVVIDKEGGVLYIDL-GHIGIGVIFGVEYLKA--QDEIKKLKKQDKVIAKIIEVENEDGYRELSMKEAKEEKNWKVMEEAQKSQNSLEVEITDANKGGLMARIGDLEGFLPVSQLAPANYPRVEGGDKNKILNELRKFIGKKMRVQILDANSKDEKLIFSEKAAENES----IQSALKKYKVGDDVDGEITGVVDFGAFIKF-----------DPLLEGLIHISELDWSLIENPNEVVKVG…
>CPR_PB2_Wildermuthbacteria_GCA_001823105.1
--------------------------------------------------------------------MIF-SSSYDKFKHMN---------------------------------NT----TM----------E-EIAKDRSELL--KPPKAGEIVRGRIIGRGRSSIFVDL-GSWGTGIIYGKEFLLA--KDLLKKAKEGDELFIKIVDLENEEGFIEVSALEADREISWLKLKEKRNTAENIMVKILGANKGGLLTTVMGVNAFLPVSQLSSANYPRVEDGDAMKILKELQKFVGQEMEVKILDLDPRGEKLILSEKIKETEK----IKEILKDYKVGDIVEGEITGVVDFGAFVKF----------GADSLEGLVHISELDWQLIENPGDVVQVG…
>CPR_PB2_Wildermuthbacteria_GCA_001825005.1
----------M----------------------------------------------------------------IARLTLALNS-----------------------------E-TA----VM----------D-KPLHSNLEMV--RPLRQGEIVEGRVVGLGKSALFLDL-GPQGTGIIYGRAFLEE--KDSLRDLKMGDMLSVKVMDIDNEEGYVELSVREAGREITWKKLHELKEKEELFKVKVLGANKGGLLAQIEGVQAFLPVSQLAQEHYPKVEGGNPNQILKELQKFMGEELEVEILDLDPKEGKVILSEKSKERTK----MKELLAKFTVGDVVEGEITGIVEFGAFMKF------------GNIEGLIHISEIDWQIIEDPSLYLKVG…
>CPR_PB2_Wildermuthbacteria_GCA_001823255.1
----------M---------------------------------------------------------------------------------------------------------TK----IL----------Q-DIFENMLETA--RPYRAGEIVEGKVVGIGKSALFLDL-GPQGAGIIYGRAFLEE--KEKLRDTKIGNMLSVKILDIDNDEGYIELSVREAGRELTWKKLQELKEKEELFKAKVLGANKGGLLAQIEGVQAFLPVSQLSQEHYPKVEGGNPTQILKELQKFVGEEMEVEILDLDPREGKVILSEKSKERSK----MKELLAKYNVGDVVEGEITGIVEFGAFVKFPASAE-AGK-DENSIEGLIHISEIDWQIIEDPSLFLKVG…
>CPR_PB2_Wildermuthbacteria_GCA_001823165.1
----------M-------------------------------------------------------------------------------------------------------E-QI----MV----------E-KPV-EKLGAL--RPFKMGDIVEGVVVGIGRSAVYLNL-GPQGTGIIFGREFQEE--KDQLKGVKVGDVIAAKIVDLENEEGYIELSLREAGRELTWGKLKEQKAKEELLKVKITGANKGGLLADVSGVQAFLPVSQLAQEHYPKVEDGDSQKILQALQAFMGQELEVEIFDLDPKEGKIILSERLKERRK----VKEILSQYKVGDVVEGEITGVVDFGAFVRFGS--------AGEEIEGLIHISEIDWQIIEDPSLFLKVG…
>CPR_PB2_Wildermuthbacteria_GCA_001823235.1
----------MT------------------------------------------------------------QTTLKGI-------------------------------QDM-P-AA----LL----------Q-DPM-QKTDTQ--KPLKTGDIVEGTVIGTGRSAVYFDL-GPQGTGIIYGKEFLDE--KRSLKPLKIGDRIAGKIIELENDEGYIEMSLKEAGKELTWDKLQEQKNKEELLSVTVIGANKGGLLAEVLGIPAFLPVSQLSQEHYPKVEDGDATKILLALQKFMGKELEVQIFDLDPTDQKIILSERSKERKK----IKEILGQYKIGDVVEGEITGVVDFGAFVKFGK--------EGEEIEGLIHISEIDWQIIENPGDFLKIG…
>CPR_PB2_Wildermuthbacteria_GCA_001823215.1
------------------------------MGARLART--PNIRVL----------------------KTL-YALVSQVTVLK-----SSAEC---------------------K-TD----V----------------KARIFSF--KPLKVGDIVEGFVLDIGRSAVYVDL-GPQGTGVIYGREFMEE--KTMLRSVKPGDKITAKIVDLENEKGYVELSVKEAGREITWDTLKLRKASEEVFPVKIIGANKGGLLAELNGIQAFLPVSQLSQEHYPRVEDGDATKILRALQSFMGKDLEVQIFDLDPKEEKIILSERSKERSK----VKEMLAAYSVGDVVEGVITGVVDFGAFVKFPSKKE-EGQ-EQEQIEGLIHISEIDWQIIEDPAQFLKVE…
>CPR_PB2_Wildermuthbacteria_GCA_001824915.1
----------MCLEHRHLK------LLFVPLG-NNGKTSFP--RDLH--------------------NEIL-YHTLEEFTRL----------------------------------------------------K-TVIKSRFDLV--KPFRIGDLVEGTVIGIGRSAVYFDL-GPQGTGIIYGREFLEE--KAALKEVTPGEKIVAKIVDLENDEGYIELSLREAGRELTWDKLKEKKEKEEVFKVKIIGANKGGLLANLHGTQAFLPVSQLAQEHYPRVEDGDSSKILRALQAFIGQELELQIFDLDPREGKVILSERSGERAK----LKEQLARFQVGDVVEGEITGVVDFGAFIKFPIGLP-AGKADEESIEGLIHISEIDWQIIEDPAQILKVG…
>CPR_PB2_Wildermuthbacteria_GCA_001824885.1
---------------------------------------------------------------------ML-SYFCKPAKHLPL---------------------------------L----NM----------K-NVI-EQSYLL--RPPKVGEIMEGTVAGQGRSALYIDL-GPWGTGIVFGREFHAA--RDLIKGLKKDERIFGKIVEIENDDGYIELSLQAAGKELTWETLRGAKENRSPIKVRVLGANKGGLLAEVSGIQAFLPASQLSAEHYPRVENADQSQILHELQKFVGQELEVHILDLDPREEKLILSEKIKEAEK----IKDLLSAYQVGDVVDGEVSGIVDFGAFIRFSPPQDPAAEGNTASIEGLCHISELDWKIVGHPREILKID…
>CPR_PB2_Nealsonbacteria_GCA_001819335.1
----MTKFCFMLTF----------------------------------------------------------SRYMETQTGILSA------------------------QGGP-A-SGW---SM----------Q-NLAAKLPEVF--NLPKVGDTLEGIVIKKSARNLYIDL-GIRGIGIVYGMEFANA--QNIIKTLKPGDNIFVKITEVENEAGLRELSLTEAKEQKSWDLIREYKKTNKIIDAKILKVNRGGLMVEIAGIPGFLPVSQLASEHYPRVEGGDKNKILEELSKFISQDFKVRILDFDPKYEKLIVSEKAAEEEH----LKLAIGQHKVGDVVSGTISGIVDWGAFIKWPAPEGGERPSEADTLEGLIHISELDWQLIENPVDFVKVG…
>CPR_PB2_Nealsonbacteria_GCA_000998855.1
----------M----------------------------------------------------------------------------------------------------------K----VM----------K-NTIENKDDFL--KLPRVGEIVEGSVIGVGRSTVYVDL-GPIGTGIIYGKEFQEA--KAALKGAKMGDKLMLKIVDLENDDGYIELSATQAGREMNWDKLVLKKDKDESLTVKVLGANKGGLLVEAEKVAGFLPVSQLSPKNYPRVEGADRTKILDKLQQLVGQEMTVKILTIDQSKDILILSEKATETEK----VKTLVKKYNVGDVVEGEITGIVDFGVFVKI----------LPDNLEGLIHISEIDWQLIDDPAEIVKVG…
>CPR_PB2_Nealsonbacteria_GCA_001819145.1
----------MKNFSSQ--------------------------------------------------LLNH-YRGLKKTK------------------------------------NN----MI----------N-DVLKSKEDLL--KPFKIGEVVEGKIIGIERAAIFLDL-GIQGTGIIYGKEFFEA--KEILKNQKIGDKLHAKVVASDNEEGFIELSLAQAKKEITWQNLSQQQKEGEIIKAKILKANKGGLMTEIGNIPAFLPVSQLAPEHYPRIKGGESSQVLRELQKFVGQELEVKILTLNQRNNQLILSEKAKEAEK----IKEILKNHKVGDIVEGEIIGVVDFGVFIKFFPSDSTIFTGDSLALEGLIHISELDWKIIEDPLEIVKIG…
>CPR_PB2_Nealsonbacteria_GCA_000992685.1
----------M----------------------------------------------------------------------------------------------------------H----LM----------E-KTI-DKENYP--KPLRVGEIARGEVVNKGKASVFLDL-GPRGAGIIYGREFYEA--KEKLKNCKAGDIFFAKVVDTENDDGYTELSLTKAGKEIAWEDLAQKRNNNENVSVRILGANKGGLLAEVSGIPAFLPVSQLSPVNYPKVENGDSQKILKALQKFVGKEMELRIFDIDPQEEKLILSEKAKESGK----IKEALKNYNIGDIVEGEITGVVDFGAFIKFSSSADNEGEETASSLEGLIHISELDWQLIDNPSEVVKVG…
>CPR_PB2_Nealsonbacteria_GCA_001819175.1
----------MDLKARLSA---------------------P--INIH------------------I-ILIF-YFIISKLKNKNTTIALVTIIC------------------------K----IM----------E-QID-EKDIFI--KPPKIGDIIQGKVIGRGRACVFLDL-GICGTGIIFGREFYEA--RNKLRNLENGNEVFAKVVDLENEEGYIELSLTEAGKEIAWEDLARKKERDEIVKVRITGANKGGLLTEVSGIPAFLPVSQLSPANYPKVEGGDAQKILKSLQKFVGQEMELKIFDFDRKEEKLILSEKAKENKR----IKEILEKYKTGDIVEGEITGVVDFGAFMKF------------DELEGLIHISELDWQLIEDPSEIIKQG…
>CPR_PB2_Nealsonbacteria_GCA_001303135.1
----------M-------------------------------------------------------------SYYHNQSSFSISKI-------------------------------N----IM----------E-T---STKNKL--RPLKVDEIVQGKVIDTGKASVFLDL-GAWGTGIIFGKEFYEA--KDKLKELKIGDSVFVKIIGLEDENGYIELSLTQAGKELAWDQLKQKKEKEEIIKVKILGANKGGLLAKVFDIPAFLPVSQLSQVNYPKVEGGDSAKILKALQKFIGREMEVKVFDFDPKEEKLILSEKAKESER----LKNILEKYKVGDLVDAEITGIVDFGAFVKIPLANPA---GEIENLEGLIHISELDWQLIEDPSAIVKVG…
>CPR_PB2_Nealsonbacteria_GCA_001821555.1
----------M---------------------------------------------------------------------------------------------------------P-----IM----------K-ETEEKEKNII--RPLKVGDILSGKIIDFGMAAVYVDL-GVLGTGVVYGKEFYEA--KEKLKEHKIGDDLFVKVTGLENDDGYVEISATKAGKELAWETLREKREKDETIIVKILGANKGGLLAKVSDIQGFLPVSQLSPANYPKVEGGDSQKILKALQKFIGKELEVKVFDFNQKEEKLIFSEKAKEDKK----IKSILENYKAGDIVEAEITGIIDFGAFVKIPIKTDD----SIDGLEGLIHISELDWQLIEDPAEIVKMG…
>CPR_PB2_Nealsonbacteria_GCA_001821455.1
----------MPL------------------------------------------------------G-------------------------------------------------F----MT----------K-ELM-ESDNLI--KPAQIGKILEGKIIGKGRSSLFLDL-GPLGAGIIYGKEFQGS--KNEIKNLKTGDTLLVKIIDLENEEGYIELSLSQASEEIIWERLRQKKEDGEMIMVKVSGANKGGLLAEVSGIAAFLPVSQLLADHYPRVEKGDSAKILQELQKFVGQEMEVKIFDLEPRDGKLILSEKAKENEK----IKEILKNYKVGDVVDGEITGVTDFGVFVRFNKKGA-----DPDFIEGLIHISELDWQLIENPADIVKVG…
>CPR_PB2_Nealsonbacteria_GCA_001819195.1
----------M-----------------------------------------------------------L-SQLLQKL--------------------------------------I----PM----------K-DLL-EQNNSV--KPAQIGKIVEGKIVGKARSAVFLDL-GPMGTGVIYGREFQEA--RDEIRNLKMGDSLFVKIIELENDEGYIELSLNQASDKITWEKLKEQKDEDKKFNVKIIGANKGGLLAEVFGIPAFLPVSQLLPEHYPRVEKGDSTKIVMELQKFVDQELEVKIFDLDARQGKLILSEKAKEDEK----IKEILKNYNVEDLVEGEITGITDFGAFMKF----------GEEGLEGLIHISELDWQLIQNPADVVKVG…
>CPR_PB2_Nealsonbacteria_GCA_000398025.1
---------------------------------------------------------------------------------------------------------------------------M----------K-ELL-DKNNLL--KPLKVGEIIEGKVIGKGKSSIFLDL-GQVGAGIIYGREFAEA--KTQLKNVKAGDTIFAKVVDLENEEGYVELSVKGASKEITWAKLAQKKESGETITVKISGANKGGLLAEVLDIPAFLPVSQLESSHYPRVEKGDQAKILKELQKFIGEELDVKIFDLSPKEEKLILSEKAKATEK----IKKLLEGCKVGDVVEGEITGVTDFGAFVRFPLKNSL---EEVEWLEGLIHISELDWQLVEDPAEIVKMG…
>CPR_PB2_Nealsonbacteria_GCA_001872265.1
----------M----------------------------------------------------------IL-SLVLQKFK-------------------------------------G----IM----------K-EML-DKNDLL--KPLKVGEIVEGKVLGKGKSSIFLDL-GQMGTGIIYGKEFSEA--KDQLKNVKPGDNLFVKIIDLENEDGYIELSVSGASKELTWTKLSQMKDKEETVMIKILGANKGGLTSEVLGIPAFLPVSQLDSSHYPRVEKGDQAKILKELQKFIGQDLEVKIFDLSAREGKLILSERAKETEK----IKKLLTNYKVGDVVEGEITGVTDFGAFIKF----------GSEGLEGLIHISELDWQLVEEPAEIVQVG…
>CPR_PB2_Nealsonbacteria_GCA_001873405.1
----------M-----------------------------------------------------------------QKL--------------------------------------N----LM----------K-ELL-EKNDLL--KPPKIGEIIEGKIIGKGKSSVFLDL-GPFRTGIIYGKEFYAV--KDKLKNLKIGDKVFAEILDLENEEGYIELSLSQASNKLIWEELKEKKENGEIISVKILGANKGGLITKISDIPAFLPVSQLLPEHYPKVEGGDTIKILRELQKFIGKELELKIFSLDQQSDQIILSEKARESEK----IKEILKNYKVGDVVEGEISGITDFGAFMKFLPAEAL---AGGPALEGLIHISELDWKIIEDPTEIVKIG…
>CPR_PB2_Nealsonbacteria_GCA_001302985.1
----------M----------------------------------------------------------------------------------------------------------G----MM----------K-KLL-EKNDQP--KPLRAGQIVEGRVIGTGRSALFLDL-GAFGTGAIYGKEFYDA--KEELKDLKIGDNIFAKVIDLDNEQGFVELSVRGASQELAWEKLRLKKEREESITIKILGANKGGLLTDISGIPAFLPVSQLKGEHYPRVEGGDTSKILKALQTFVGQEMEVKIFDLSQKEEKLILSERAKEAEK----IKEILGEYKAGDVVEGEVTALCDFGAFVRF----------GKEGLEGLIHISELDWALVEDPSEIVKVG…
>CPR_PB2_Nealsonbacteria_GCA_001872205.1
--------------------------------------------------------------------MFF-NYIKKSFKFQISLPPRSEI------------------PKVE-K-SF----IY----------K-DVE-TKNDLA--KPPKIGEIIEGKIIGFGRSAVYLDL-GFLGTGIIYGREFFEG--KEILKKLKIGDKILTKIIDLENEEGYIELSIAQAGKDLAWQQLAQKKDEGEILKVKILDANKGGLLAEVSGISAFLPVSQLSSEHYPRIEGGDQEKISKELKKFVGQELEVKIFDLSPREEKLILSERAKETDK----IKEILKSYKVGDVVEGEITAILGFGAFLKFPLPS------ESFALEGLIHISELDWKLIEDPMEVVRVG…
>CPR_PB2_Nealsonbacteria_GCA_001821485.1
----------M---------------------------------------------------------------------------------------------------------AI----KM----------K-DLL-EKNNLI--KPARVGDIMEGKVINRGKSSLFLDL-GPIGTGIIYGKEFLES--KNKIRGLKQGDAIFAKVIDLENEEGFIEMSVKGAAAEITWDILSQKKDKGELIMVKILGANKGGLLAEISGISAFLPVSQLDSEHYPKVEGGDPQKIQQELLKFIGQELEVKIFDLKPATQEIILSEKAKKADK----IKELLKNYKKDDEVAGEITGLTDFGAFVKF-----------GEELEGLIHISELDWKIIEDPSEVVKVG…
>CPR_PB2_Nealsonbacteria_GCA_001303125.1
----------MK------------------------------------------------------------------------------------------------YFREG-R-PN----IM----------K-ELI-ERENLS--RPPKVGEIIEGKVVAKESGKLFLDL-GPIGTGIIYGKEFYEA--RAKIKDLKIGESLFAKVIGLENEEGYIELSISQAGIELSFEALRRKKEEGEKILVKILGANKGGLISEVMGIPAFLPVSQLTPEHYPRVEKGDTVKILRELQKFVGKELEAKIIDLSQKGEQIILSEKAKESDK----VKEMLANYKVGDVVEGEITGITNFGAFMKF----------GKEELEGLIHISELDWKIVEDPTEIVKIS…
>CPR_PB2_Staskawiczbacteria_GCA_001873425.1
---------------------------------------------------------------------------------------------------------------------M----SP----------K-NLRKIKEEII--CPPKIGEIVEGKIVASEPNALFLDL-GFQGIGIIYGRAFYEA--KDILKNLKIGDKLSAKITSLENENGYRELSPKEASEELNWEELRHKKEKGESLEVKISGANKGGLLAQIMGVPAFLPTSQLAPEHYPRVEGGDALKIVKELQKFIGQKLKVKIFAFNQREEKIILSEKASKMEK----IKETLKNYKTGDVVEGKITGITSFGLFLKF----------DKDNLEGLVHASEMPGKISKDMSN-LKID…
>CPR_PB2_Staskawiczbacteria_GCA_001872225.1
---------------------------------------------------------------------------------------------------------------------M----QI----------K-NLKKIKAEPL--APLKVGEIVEGHIVEKDKSGLYIDL-GAKGVGIIFGKEFAQA--KISLKSSKIGDKVTAKIVDLETEDGYKELSLASANQEIAWQDLQKLKENEETIEAVVKSANKGGLLMSINSIDGFLPASQLLPEHYPKVDGADPLKITTELQKLIGQKLKVRVFDLNPSENKLILSEKQTKKEK----AVSKIISLKEGEEVEGEVSGVTSFGAFLSF-----------NDGLEGLIPSEEM------AKKKDLKIG…
>CPR_PB2_Staskawiczbacteria_GCA_001820485.1
----------MK--------------------------------------------------------------------------------------------------------------VM-------------LSNKN-EVS--ANPNIGSTVEGTVVARERSALYIDL-GVFGAGIIYGREYFEA--KELIKGLNVGDKVFAKITEMENDQGYRELSLKGASKDMSWQKLRDIKEKGEIVKVKVTGVNKGGLLAVLDGISAFLPVSQLAPEHYPRVVDADKQKILRELQKFIGKTLEVKILDLLAEENKLILSEKAKAEEQ----TRETLKNYKKGDIISGQITGIADFGVFIKFPITAKTLAKEEKAGIEGLIHISELDWQLVENPAEVVKVG…
>CPR_PB2_Staskawiczbacteria_GCA_001821945.1
----------M----------------------------------------------------------------------------------------------------------I----MI----------K----EKIKEGS--APLTIGSTIDGIVVARDRSSLFVDL-GFFGTGIIFGREFYEV--KDVIKNLKIGDKIFAKIVELENEEGYKELSLKDATKEISWQSLKDIKEKGTVLKVKITGVNKGGLLTSLDNIPAFLPVSQLSPENYPRVIDADKQKILKELQKFIGKTLEVKILDLMAQENKLILSEKAKTEEK----IKEILKDYKKDDIIEGEITGIADFGVFIRFPLSADS----SESGIEGLIHISELDWQLVENPSEVVKVG…
>CPR_PB2_Staskawiczbacteria_GCA_000992015.1
----------MK--------------------------------------------------------------------------------------------------------------MI----------K-DIIEKAKDAP--AVVCVGSTVEGTVVARDRSSLFIDL-GILGTGIIYGREFYEV--KDIIKSLDIGDKVFAKVVEMENDDGYRELSLRDATKEISWNRLKEMKEKGEIVKVRISGVNKGGLLTNLDGIPAFLPVSQLAPEHYPRVADADKQKILKELQKFIGKTLEVKVLDSLAEENKLILSEKAKTEEK----IKEILKDYKKGDIVEGEITGVADFGAFIKFPSTVE----EGKEQIEGLIHISELDWQLVENPAEVVKVG…
>CPR_PB2_Staskawiczbacteria_GCA_001822075.1
----------M-----------------------------------------------------------------------------------------------------------------------------SIIKKNKESG--NSLQVGSTIEGKVVARDRSSLFIDL-GIQGTGIIFGREFYRA--KDVIKSLTAGDKIYAKIIELENEDGYIELSLRDATKEISWQKLEKIKNSGEILNVKITGVNKGGLLTTLDGIQAFLPVSQLAPEHYPRVADADKQKILKELHKFVGKTMEVKILDLLAQENKLILSEKAKSEEK----LKEILKDFKKGDTIEGEITGIADFGAFIKFPLPAEAEEPSKSSQIEGLIHISELDWQLVENPAEVVKVG…
>CPR_PB2_Staskawiczbacteria_GCA_001822095.1
----------M---------------------------------------------------------------------------------------------------------NA----ME----------K-NIIKKIVDPS--TQLSIGSTIEGKVVARDRSSLYIDL-GINGTGIIFGREFYAA--KNIIKTLQPGDKVFAKIVELENDEGYKELSLKDATKEISWQRLKEMRDSGEIINVKITGVNKGGLLASLEGVQAFLPVSQLAPENYPRVADADKQKILKELQKFIGKTMEVKVLDLLASENKLILSEKAKSEEK----MKEILKDFKKGDTVEGEITGIADFGAFIKF------------GEIEGLIHISELDWQLVENPAEVVKVG…
>CPR_PB2_Staskawiczbacteria_GCA_001822065.1
----------MN--------------------------------------------------------------------------------------------------------TT----KE----------N-NPPKKTAEAI--NPLQVGATIEGKVVARDRSSLFIDL-GIHGTGIIYGREFYSV--KDVIKNLDIGDKVFAKIVEVENDEGYRELSLRDATKEISWQRLKELKDSGQILSVRITGVNKGGLLTAIDNIQAFLPVSQLAPEHYPRVIDADKQKILKELQKFIGKTLEVKILDLLAQENKLILSEKAKSEEK----TKETLKNYSKGDTIDGEITGIADFGAFIKFPFPAE----NKNDQIEGLIHISELDWQLVENPAEVVKVG…
>CPR_PB2_Staskawiczbacteria_GCA_001820145.1
----------MS----------------------------------------------------------------------------------------------------N-D-N-----TI----------K-DVLDASSEIS--PSPSVGSIVEGKVVARDRSSLYIDL-GIQGTGIIYGREFYQA--KDVIKNLKVGDVVFAKVTELENEDGYRELSLRDATHEINWQKLKEMKDNEELVNVKITGVNKGGLLTNVNGLAAFLPVSQLSPENYPRVEDADKQKILKELQKFVGKTMEVKVLDLLESEGKLILSEKAKTDKA----LKEILKNYQKGDTIEGKITGIADFGAFIKFPLSEKS---EETSEVEGLIHISELDWQLVQNPAEVVSVG…
>CPR_PB2_Staskawiczbacteria_GCA_001820175.1
----------MK----------------------------------------------------------F---------------------------------------------------IM----------K-EAVQKTSDSV--IPPSIGSIVEGKLIARDRSSIFIDL-GPQGTGIIFGREFYEV--KDAIKNLQIGDIIHAKIVELENEEGYRELSLQDATKDINWQKLREMKDNQEIIKVKITGVNKGGLLTNINNIAAFLPVSQLSPENYPRVTDADKAKILKELQKFIGKTLEVKVLDLLAEENKLILSEKAKTEQA----IKQMLNNYKKGDVVDGKITGIADFGVFIRFPLAAENGAEKKDDSIEGLIHISELDWQLVQNPSEIVKVG…
>CPR_PB2_Staskawiczbacteria_GCA_001820255.1
----------MS-------------------------------------------------------NMQFKTYYTRGLRIPPS---------------------------------M----IT----------K-EKTQKNSDSV--IPPSIGSIVEGKVVARDRSSLFIDL-GNQGTGIIYGREFYEV--KDVIKNLQIGDTVHAKIVELENEDGYRELSLQDATKDINWQKLREMKEKSEIIKVKITGVNKGGLLTNINNIPAFLPVSQLSPENYPRVADADKAKILKELQKFIGKTLEVKVLDLLAEENKLILSEKAKTEQL----MRAILDNYKKGDVIEGKITGIADFGVFIRFPISALKENTKKDESIEGLIHISELDWQLVQNPAEVVKVG…
>CPR_PB2_Staskawiczbacteria_GCA_001820095.1
----------MR--------------------------------------------------------------------------------------------------------------IM----------K-EVIKKVKEIS--NAPGIGSIVEGKVVARDRSSLYIDL-GNQGTGIIYGREFYEV--KDAIKNLQIGDTIFAKIVELENEDGYRELSMRDATKEINWQKLAGMKEKEEIIKVKITGVNKGGLLTNINNIPAFLPVSQLSPENYPRVADADKAKILKELQKFIGKTLEVKILDLLAAENKLILSEKAKTEQA----IKKILTNYKKGDVIEGKITGIADFGVFIRFPLASEPGNEKKDESIEGLIHISELDWQLVQNPTEIVKVG…
>CPR_PB2_Staskawiczbacteria_GCA_001820215.1
----------M--------------------------------------------------------QLILIPLYIYKVRKNNQ---------------------------------I----MK----------E-DTNKKQDNST--QAVSVGSIVEGKVVARDRSSIFIDL-GNQGTGIIYGREFYAV--RDIIKNLNIGDTVFAKVVELENEEGYRELSLRDATQEISWQKLREMKEKEEIIKVKITGVNKGGLLTSVNNITAFLPVSQLSPENYPRVIDADKQKILKELQKFIGKTLEVKILDLLAEENKLILSEKAKTEQA----IKKIISGYKKGDIIEGKITGIADFGVFIRFPLAVSEVANSQEDSIEGLIHISELDWQLVQNPAEIVKVG…
>CPR_PB2_Staskawiczbacteria_GCA_001820305.1
----------M---------------------------------------------------------------------------------------------------------------IV----------K-DIDKKVNDAP--MSPQMGSLVEGKVIGRDRSALYVDL-GPQGTGIIFGKEFYLS--KEAIKDLNVGDIVHAKIVEMENDDGYRELSLQDATKDLNWQKLRDLKASGEIIQVKITGVNKGGLLTSVNNMAAFLPVSQLSPENYPRVADADKAKILKELQKFIGKTLEVKVLDLLAEENKLILSEKAKTEQA----IKEILANYKKDDVIEGKITGIADFGAFIKFPVNEES---APNTQIEGLIHISELDWQLVQNPAEMVKVG…
>CPR_PB2_Staskawiczbacteria_GCA_001820195.1
----------M---------------------------------------------------------------------------------------------------------------ML----------K-TTDKKNQEIS--PSPSVGSIVEGKVVAKDRSSLFLDL-GPQGTGIIFGKEFYLA--KDTIKALNIGDTVHAKIVELENDDGYRELSMQDATKDMGWQQLREMKEKAEIIKVKITGVNKGGLLTNINNIPAFLPVSQLSAENYPRVEDADKAKILKELQKFIGKTLEVKVLDLLAEENKLILSEKAKTESA----IKEILDKYKKGDVIEGKITGIADFGVFIKFPIAENS---AEKNSIEGLIHISELDWQLVQNPAEVVKVG…
>CPR_PB2_Staskawiczbacteria_GCA_001821915.1
----------MK--------------------------------------------------------------------------------------------------------------MI----------K-EIIKKPKEIT--PSPSVGSIVEGKIVARDRSSLFIDL-GPQGTGIIYGREFYEV--KDAIKNLNIGDTVFAKVVELENEDGYRELSLQDATKDINWQKLREMKDKEEIIKVKITGVNKGGLLTNINNIPAFLPVSQLSPENYPRVVDADKAKILKELQKFIGKTLEVKVLDLLAEENKLILSEKAKKEQL----LKEILKDYKKGDIIEGKITGIADFGVFIKFPLEGASPAESINSSIEGLIHISELDWQLVQNPAEVVKVG…
>CPR_PB3_Jorgensenbacteria_GCA_001002925.1
----------MWAI----------------------------------------------------------------------------------------------------K-IK----PM----------Q-QLL---DSKR--KIAKVGDVLTGAVLHKEARRIFIDL-GSFGTGVVLGREYLNA--LGTIKGLKIGAEISVKIIGSLNEDSYWELSLSEADKEAAWQRMRDLKDKKETLSMAVMGVNYGGLLLQLNGIEGFLPVSQLSLEHYPRVDGGDKSKILEELRKFTGKEMKVRILDLDEKEGKLIFSEREAQKEA----IQQAVAHYQIGDTIEGEITGLADFGVFVKF---------GGEFALEGLIHISEIDYALVDDPSKYVQVG…
>CPR_PB3_Jorgensenbacteria_GCA_001001185.1
---------------------------------------------------------------------------------------------------------------------------M----------Q-QILETI--KK--ASPGVGSILAGSVLKKEPRRLFIDL-FSSGSGIILGKEYLFS--IDRIRGLRLGDEVVVKVIGSMDENGFWEVSLNQADKEAGWEKVRAARDNREIVGLTVSGANQGGLLMQFEGIEGFLPVSQLALEHYPRVEGGNKSRILEELRKFVGKEMKVRVLDFNQGEGKLIFSEKEAEQEK----LQNLLLNYKINDVVEGEITGIAPFGAFIRF----------GDPALEGLIHISEIDHKLVDDPSSYLKVG…
>CPR_PB3_Jorgensenbacteria_GCA_001824435.1
----------M--------------------------------------------------------L---FVPLLAFSSYVAYTIMHQTV-------------------VEK-E-DG----YM----------E-RLLKDK-KVC--ALLKDGDLAKGVVMEKRPKKLFVDL-GAYGTGLVYGVEYLNA--NDLIKTLEVGAEVVGKVIDPENDAGYIELSLKEAGKQKGWDMIQDVHAKDEKFEASITGYNRGGLVADVFGIAGFMPVSQLSNEHYPRV-GADQQKILEALRQFVGKTLAVKILSFNQKSNKLVISERAVAESD----LRALVATYRIGDVIDGIVSGVTDFGAFVRF---------SDNSELEGLVHLSEIDHRLIDTPRSVLNVS…
>CPR_PB3_Jorgensenbacteria_GCA_001781035.1
----------MS--------SC-----------------------------------------LTRLLS-I-MSVMQ-----------TIL-------------------KPK-P-QS----LL----------H-QVLHDFPALF--ASLKPGDVVSGTVLHKGSKLMLVDL-GKNGTGAVYGGELVHA--REMVRGLQAGSIVFGKVISPDNEEGFVELSIADAGKQKAWEEVNELREKDEAFTIRPSGFNKGGLIADIAGLKAFLPLSQLSPEHYPKVQDGDKAKIVQELQRLLKEDFSVKIIDVNSKSDKLIISERAATEDS----MKRFAEQYSVGQIIEGVISGVASFGAFIRF---------TDNPAVEGLIHISELDYRLIENPKEVVSID…
>CPR_PB3_Jorgensenbacteria_GCA_001779505.1
----------MPRDALQSY-----------------------------------------------------YRTMNCLDFQFTFGAREAM-------------------VRV-K-QN----AF----------T-NFIKDHGDLF--TFVKAGDLVAGRVIAKNPRTIIVDL-GTYGTGVIYRGELMHA--RDVARKAEVGTDIQAKVVEVDNEDGFVELSLAAAARQQSWLKLEELFGKEEVFAVAPSAANKGGLVADVEGVKAFLPASQLSPEHYPRVEDSDKGKIEAKLAELIGKELKVKIIDCNPRTEKLIISERAAAEAN----TAELVKAYSAGQVIEGIVSGIADFGVFVKF---------TDNPEVEGLIHVSELAYRTVTNPKEIVNLN…
>CPR_PB3_Jorgensenbacteria_GCA_001779475.1
----------MT------------------------------------------------------------TNYV----------------------------------------QQ----FF----------K-QFVKDKPELF--SVLKAGDLVEGVVLEKGANSMVVDL-GRHGTGLVYREEIQNA--KGAVKELKIGDPIHAKVIEVDNEEGVVELSLTEAGRQKAWAEIQELQEREEIIKIKIKSANRGGLVADLSGVPAFLPVSQLAGEHYPRISTEDRNQITAELQKLVGMELEVKIIDANPRSSKLIISEKAAVEVS----VKELAKNYEVGQVIEGVVSGVADFGAFIKF---------TDNPAIEGLIHISELSHQMIENPKEVISVD…
>CPR_PB3_Jorgensenbacteria_GCA_001004105.1
----------MT-----------------------------------------------------------YYSKFSAFSLAFQAKATSPN-------------------KAQ-E-QQ----SF----------R-QFVKTKPELF--AVLKNGDLVEGWVLEKGANALMVDL-GRYGLGIVYREELQNA--REAVRGLEVGSVVHAKVREIDNEEGLVELSLTEAGKQKAWAEAQELQEKDEPIKVSIKGSNRGGLVTEIAGLPAFLPVSQLSTEHYPVKTSDEKNPAPDILEKLIGQELSVKIIDVNPRLSKLIISEKAATEIS----AKELVKNYEVGQVIEGIVSGVADFGVFVRF---------TENPAVEGLIHVSELSHKALENPKEVVNVD…
>CPR_PB3_Jorgensenbacteria_GCA_001004035.1
----------M------------------------------------------------------------IFRSIALM-------LSMNS-------------------VKP-Q-NG----NL----------T-QFLKTDQTLL--SSVRPGDLVKGVVLEKNSKRLVVDL-GRAGTGAVYWNEMQNA--REIVRGLKIGDELSAKVIQVDNEEGMIELSLSQADKQKAWSELQEIKDKEEVLTVKASKFNRGGLIAEMHGLPAFLPVSQLAQEHYPKAAPEDKAKIAAALEALVGQELKVKIIDLNSRTNKLIVSERAANEIS----IKELAKNYEVGQVVEGIVSGVADFGAFLKF---------TDNPVVEGLIHVSELDWREVVNPKEVLNVD…
>CPR_PB3_Jorgensenbacteria_GCA_001001265.1
----------M------------------------------------------------------------YLERMQ-------------T-------------------TQK-Q-ED----LS----------T-DFIKAEVANV--NLLKISDVVEGVVLEKGSRMMIVDL-GAHGVGAVYRGELQNA--REIVRGLSLGDTLAAKVVEVDNEDGYIELSLAQADKQKSWEVVQDIKEQEEIIKIKFTAFNKGGLVGDLKGLSAFLPVSQIVSGFEGKNNINNKEDIAGILGGLVGSEFEVRIIDANPRTNKLIVSEKAAREES----AKELAGNYEVGQIVEGVVSGVADFGAFIRF---------TDNPTVEGLIHVSELGYRIIENPKEVIKVD…
>CPR_PB3_Jorgensenbacteria_GCA_001779535.1
----------M---------------------------------------------------------------------------MITAI-------------------KQE-G-EQ----AP----------V-SVVKSEISAM--RLLRLGDLVEGKVLEKGSRMILVDL-GLYGTGAVYRGEMQNA--REIVRALNVDDPVRGKVVDVDNEDGFVELSLSHADRQKSWENVQDIKDKEEVLKVKITGFNKGGLITDIHGLPAFLPISQLINPSENKGEIGVN-GSHTDLEKLVGGEVEIRITDVNPRTNKLIISEKAAKEES----SREMVRNYSVGQIVEGVVTGIADFGVFVKF---------TDNPSVEGLIHISELGYKIVENPKEMVKID…
>CPR_PB3_Wolfebacteria_GCA_001793865.1
----------MK--------GC----------------------------------------TVLKFKTAFRFCSFSHISACNAMHIVNDD-------------------VKK-K-EH----PL----------A-RILRSNPQLT--VPLKDGDTVEATLLAKDLRRAYFDL-RGKGTGIVWGVEHVQA--REILKGLKAGDAIQATVLQAENDEGYSDISLTKAMWQKNWQDVRQLKDSGDLCTVKIIGANTGGLVTELQNIKAFIPVSQLSTENYPHVEDGNKNKILEELKKFVGNEMEVKVLDFNPKNEKLILSQREVTGEG----MKEVLEKYTVGDTVEVIVSGVADFGVFVRF---------VDNPNIEGLVHISEIDHRLIDSPKEVVKVQ…
>CPR_PB3_Wolfebacteria_GCA_000996445.1
----------MT-----------------------------------------------------------FLTVMN-------------S-------------------KAI-N-PA----LL----------P-QIIKTEPDLI--SFLKEGDLVETRILTKAPKAVYFDL-NKFGTGIVYGNELMNS--RDILKNLAEGETISAKVISSDNEEGFIELSLAGAYKQKEWQVLKETMENDEILSVKISGANTGGLTTEISGIKAFLPVSQLSNKNYPRVESNNRQDIVKELGKMVGQELKVKIIDLNSRTNKLILSEKEAAEED----TKKLLANYKVGDMVDAIVSGVTNFGVFVRF---------IDQPAIEGMIHISELDWRIIDHPKEVVKID…
>CPR_PB3_Wolfebacteria_GCA_001793825.1
----------MT-------------------------------------------------SGGQKFLS--NNFMVQ-------------K-------------------TEN-K-TS----FF----------S-QLLKNEPDGV--SYLRDGDLVEAALLSKTAKAVYFDL-GRFGTGIVYSSEISNA--KDILKNLKAGDKVSVKVVSIDNEDGFVELSLAGAHKQKEWQFLRELMEKGEILEVKLNGANSGGLVAEINGIKAFLPVSQLSVKNYPRVEGSDKNEIIKELKKLVGQELKVKIIDLNSRNNKLIISEREAAEED----IKKLLTNYKVGDLVDVIVSGVTNFGVFARF---------ADNPSIEGLIHISELDWKIIDHPKEIAKVE…
>CPR_PB3_Wolfebacteria_GCA_001793785.1
--------------------------------------------------------------------------------------------------------------------------------------------------------------------------------------------------------------------------------------------------------------------------------------------------------------------------------------------------------------------------------------MEGLVHIAEIEYRVIDNPKEIVKID…
>CPR_PB3_Wolfebacteria_GCA_001871625.1
----------MKK-----------------------------------------------------------LIFMS-----------SIT-------------------AKK-T-NS----AI----------N-QLMKTEPDLI--SFLKEGDLIEVKLLKKTPRAAYFDL-DKFGTGIIYGIELSNA--RNLLRDLQVGGSVAAKITDLENESGFVELSLAGARQQRNWQELKELRDNEGALTVKIVGANSGGLVTTINEVKAFLPVSQLTSEHYPRVDNSDRNKILEELRKFVGQEMKVKIIDLNPRTNKLIVSERGVIEQN----IKELIEKYKVGDVIDGIVSGIADFGVFIRF---------ADNPAIEGLVHIFEIDHRLIDDPKEVVKIN…
>CPR_PB3_Wolfebacteria_GCA_001000675.1
----------M-------------------------------------------------------------VTNIN-------------A-------------------EIK-N-SS----AM----------N-QLTKADANII--SFLKEGDLVEAKLLAKTKRGVHFDL-GKYGTGIVYGIELINS--RDIVKGMNAGDTVSAKIIMLENNEGYVELSLINAQEQKNWQGLKELKDGDEPFGVKIKGANSGGLVADIHGTKAFLPVSQLSSEHYPRIEKGDQTRILEELKKFVGEELMVKIIDLNPRANKLIISEKEAVEEN----VRELLGKYAVGDVITGVVSGIADFGAFVRF---------IDNPGIEGLIHISELDYRLIDTPKEVVKID…
>CPR_PB3_Colwellbacteria_GCA_001817755.1
----------------------------------------------------------------------------------------------------------------------------------------------------------------------------------------------------------------------------------------------------MKVKIISSNSGGLIATIGSVQAFLPASQLSNEHYPSGIETNRAKVAEELKKFVGQELQVKIINLNPRTGKLILSEREIMSAN----IKELVAKYKVGETIDGIISGVANFGAFLKF---------ADNTQVEGLIHISELSHTLVDNPKDIVKVG…
>CPR_PB3_Colwellbacteria_GCA_001872405.1
----------MQ----------------------------------------------------------------------------AAS-------------------LKN-Q-ES----VE----------L-QILKSEPGLM--PILKPGDLIQVKVLEKKGKAVYFDV-PKVGTGIIYGAELLNA--RDAIKKLNSGDEVSAKVIVPENENGLIELSLSEADKQKVWQELKEIKEKDEVFAIKVANANSGGLIAEVNGLSAFLPGSQLSSEHYPKGAEGDRTKMIEEFKKFIGEELQVKILSLNPRTNKLIISEREAANAN----VKDLLNKYKISDVISGIISGVANFGAFLRF---------ADSPEIEGLIHISELDHRLIDNPKEVVKVG…
>CPR_PB3_Colwellbacteria_GCA_001817795.1
----------M--------------------------------------------------WGLTKPLS-T-TTLMQ-----------QAA-------------------QRK-S-LS----PE----------L-HILKGNPSLM--PILKDGDLVEVTLMQNGNKSVFFDI-PKVGTGVIYGVELISA--KSILKKLKIGDSVTAKVVEPENEDGYVELSLAEADKQKAWQELKDLKDNDEPIEVTVTGANAGGLITELAGLQAFLPASQLSNENYPKDVDGNRAKVIEELGKFVGQKLFVKVLSVNPRTNKLIVSEREVIAED----VKKLLEKYSAGDIVPGIVSGVANFGVFVKF---------ADEPKIEGLIHISELSHNVIDHPKEVVGVG…
>CPR_PB3_Colwellbacteria_GCA_001003145.1
---------------------------------------------------------------------------MNIFSALTQPE---TG-------------------TDT-G-LT----SM----------K-EILAE--YEK--TFPHLGDILDGTVISAAKTQILVDL-GSLGTGIIYPAEFNNN--PEIVKSLHPGDPLSVILLEVEDESGFRVLSLKQAQITSAWEDIKEKKNSGTVIATSILNINKGGLIVEVNGIQGFLPLSQLSPEHYPKIGGGDVTKIVQALQKYRGQVFNVKILDFSEEEGKLIVSEKATMQDQ----LKAELDKFKLGDTIDGEITEITDFGAFIKL-----------TDNLEGLIHISEIDWKMVENPRDYLTIG…
>CPR_PB3_Harrisonbacteria_GCA_001002005.1
----------MP-----------------------------------------------------------NSSSVDTKSYTLYPVPIPQT-------------------IKK-N-NS----EM----------A-QLLKQEPEIF--SIPKIGDLTEARLIAKALRAAYFDL-GSYGNGIVYGAEYINA--KNVIKELEIGETTPAKIIDLENDEGYIELSIAEASQQKKWREVKELFEKDEPLKVKIIGANAGGVTAEISSIKAFMPVSQLANEHYPRVGEGNRTKIAEELKKFIGQEFTVKIIDVNTRANKLIISERAATEQN----VKELLLKYSVGQVIDGIISGVADFGAFVRF---------ADNPLIEGLIHISEIDHKLIDNPKDVVKVG…
>CPR_PB3_Harrisonbacteria_GCA_001817925.1
----------M-------------------------------------------------------------NTFMA-----------SIK-------------------KIA-T-LS----QF----------A-QLIKGEPALV--QILKVGELISVTFLERTSREAYFEI-GNIGTGIIFGTELLNA--RKLIEELKVGDSLTAKIVSLDNGHGYVELSISEAGKQKAWQVIKELQEKGEIITVKIGGANSGGLTTVINNIPAFLPVSQLSNENYPRVNDGDRAKILEELRKFVGRDLKAKIIDVDARKNKLIISEREISDQN----VKELLGKYTAGQIIDGVISGVADFGAFIRF---------TDNPAIEGLIHVSEIDHKIVENPKEVLKIG…
>CPR_PB3_Harrisonbacteria_GCA_001818695.1
----------MS--------------------------QHS----------------------VANFLT--VLDMLN-------------S-------------------FKK-P-DS----PV----------A-LLVKNSPDLM--SMIKEGDLVNGKLLKRAPRKVYFDL-GRFGTGVIYGLEFSNA--REVLKKLKEGDEVSAKVVSVENDDGYVELSLAGAEKQKSWQVIKELWEKGEELPVKITGANVGGLMAEVEELKAFLPVSQLSNEHYPRVDDGSKEKILEELKKFIGQELKVKILDVNPRTFKFILSEREVTNQN----VKEKLTKYKAGDIVEGIVSGVADFGAFVKF---------ADDPEIEGLVHISELDHKLVENPKEVANVN…
>CPR_PB3_Harrisonbacteria_GCA_001818705.1
----------MT------------------------------------------------------------SHMIS-------------V-------------------AKK-P-ES----AI----------A-QLIKSSSDLI--SVAKEGDLVNGILIKRMPRAVYFDL-GRFGTGIIYGSELMNA--REILKNLKAGESISAKVVEADNDDGYVELSLAGASRQKSWQAVRELSEKGDEVTVKITGANAGGLMAEIEGLKAFLPVSQLSSEHYPRVDDGSKEKILLELKKFVGQGMSVKILDVNVRTDKLIISEREITSVN----VKEKLNKYKAGDIIDGIISGVADFGAFIKF---------ADDPELEGLIHISELDHKLIENPKDIVKVN…
>CPR_PB3_Harrisonbacteria_GCA_001817915.1
--------------------------------------------------------------------------MIN-----------MIN-------------------NKK-L-NS----PL----------A-QLIKNEPALM--SVLKDGDLIEARLLKKASRQVYFDL-GSFGTGIVYGVELTNA--QTIIKGLNAGDSVSAKIVDPENEDGYVEISLSEAGKQKIWQGIKELQEKGEVISVKISGANSGGLVAPINDIKAFLPVSQLTTEHYPRVDNGDRGKILEELKKMVGQELKVKIIDFNPRTDKLIISERETASQN----IKALLDNYKAGDVVDGIISGVANFGAFMRF---------TDNPQIEGLIHISELDHRLIENPKEIVKVD…
>CPR_PB3_Liptonbacteria_GCA_001821315.1
M---TAYLLFMP----------------------------------------------------------------------------API-------------------ASK-K-IS----AV----------A-QLVKNEPELL--SVIREGEIVAAKLIKRMPRAAYFDL-GKAGTGVIYGLEFMNA--KETLKKLAAGEEVHAKIVGLDDGNGNIELSLAEATKQKAWQAVKDIKESGEVVKVKISAANSGGLIAELSDLKAFLPVSQLSNEHYPRVADNDREKILEELKKFVGQELSVKVIDANPRTAKFIISEREITNEN----VKELLAKYEVGQVVDGIISGVANFGAFMRF---------ADNPQIEGLIHISEIDYKLIENPKDVVKVD…
>CPR_PB3_Liptonbacteria_GCA_001821375.1
----------M-------------------------------------------------------------AITIE-------------K-------------------LPK-K-IS----VF----------A-GIMKAEPELF--VFLKEGDLVEAEFIGKEKGKAFFNL-GRYGTGVVFGREFLNA--REIIRELEQGRKMTAKVAMLDNENGYIELSLTEADKQKVWQELKEMKDSGEAFTVKITGVNAGGLTTDIKEIKAFLPVSQLSNEHYPRVGD-FKEKILEELKKFVDGELQVKIITVNPKANKLIISEREITDEN----VQELLKKYKVGDVVDGIISGVADFGAFIRF---------VNDPEVEGLIHISELDHKLVENPKEIVKVD…
>CPR_PB3_Liptonbacteria_GCA_001818625.1
----------M-------------------------------------------------------PFAIRIMSIVE-------------P-------------------IAK-Q-VD----AL----------A-QALKTELQNT--EWPKEGSVVEATLIKKVPRKAYFDL-GRFGSGIVFGAELQNA--KEIIRNLKPGAKIPAKILELDGEEGCIELSLSEAGKQKLWQQVKELAEAGEVVKVKISAANAGGLMANLGGLKAFLPVSQLSLDHYPRVVENDRQKIAEELKKFVGQELSVKVIDVNPRSNKIIISEREVLSAN----VKELLTKYAVGQVVDATVSGIADFGVFVRF---------TDNPEIEGMIHISELDHRLIDNPKEIVKVN…
>CPR_PB3_Liptonbacteria_GCA_001818615.1
----------MT------------------------------------------------------------------------------D-------------------NKN-S-KT----AL----------L-EAIKDELSNV---RLRDGEIVDAELMKKTPRGVFFDL-GRFGTGIVYGAELSNA--RDIIKKLNIGDKISARIETIDGEGGYVELSLAEAGKQKVWQQVQELQESGEVIKIKITGANQSGLLADLLGLKAFLPLSQLSTEHYPKGVEGDQQKGIDALKNFAGQELNVKVIAVNSRTNKLIVSEREMLAAN----VKELLAVYKIGQDVDGIVSGIANFGIFVRF---------VDNPQIEGLVHISELDHRIIDNPKEVVGID…
>CPR_PB3_Liptonbacteria_GCA_001818575.1
----------MS-RRFATG-SLPFN----PIIPRILTERRP-------------------------PLSAF-VAMTN-----------EIS-------------------SSK-S-GT----AL----------L-AAMKDDLGNA--ARLREGEVVHVVLLSKTSRAAFFDL-GNFGTGIVYGAELSSG--REILKSLEPGQSVPARIESVDGYMGYVELSVSEAGKQKAWMEVKTLEESGEVVKVKVTGANQGGLIADLLGLKAFLPISQLSNEHAPKNTDGDRMRSAEELKVLVGQEISVKIITVMPRANKLIVSERAASSST----MKTALAKYEVGQVVPGLVSGIADFGIFVKF---------VDDPEIEGLIHISEIDHRIIDNPKETVKLG…
>CPR_PB3_Liptonbacteria_GCA_001818655.1
----------M------------------------------------------------------------NPNSME-------------SP------------------NNK-T-NL----AL----------A-QILKQEPG----NRLREGDVTDVALLKKTSREAFFDL-GKFGTGLVYGAEFLNA--KDMLRDLAVGAHLPAKVIDLDGERGYTELSLAEAGKQRLWQQVQELADNGEIIKMKVLGSNSGGLTGNILDLKAFLPLSQLSNEHYSKLTEGDRQKSIDELKKFVGEEVSVKVINVNPRNNKLIVSEREILATN----VKELLSRYEVGQVVDGLVSGLADFGIFIRF---------VDNPQIEGLVHISEIDHRLIENPKEVMKLN…
>CPR_otherPB_Sungbacteria_GCA_001822385.1
----------MRSSCMRRP------------------------------------------------VYSL-GMEMEPNAEPKLDA----A-------------------IPR-G-RH----PM----------E-LLMKQKSDPA--AFLKAGDIAEGEVLEKRGTRLFVDL-GARGTGIIFGREYHEA--HDMIKGLAPGDRIAAKVVEPDNEEGYVELSLREAGREKVWKELARLMAAGELVRLKVLEANRGGLILEHLGVSGFLPASQLSSEHYPRVDGGDKMRIHEELKKLVGQEFEVAVIDVNQDDEKVIFSEKTRETEA----VKQRLAAYKVGDVIEGEVAGVVSFGAFVRF-----------GDGLEGLIHISEIDWQLITNPADVLKSG…
>CPR_otherPB_Sungbacteria_GCA_001820755.1
----------MS------------------IANSAAAA----------------------------------VAIMEKNSLKISSA----P-------------------LNR-P-KH----PM----------E-ALLRQKGDAT--VFLKAGDIVEGPVIEKRGSRLFVDL-GSRGIGIVFGREYYSA--QEIVRGLIVGDPVTAKVVEPENDEGYIELSLKEAGREKNWQELKRMMEAKEIVRLKIAEANRGGLILALAGVLGFLPASQLAQEHYPRVEGGDKEKIFDELKKLVGQEIDVTILDIMPEDGKLIFSEKSRETAA----LRERLAAYHVGDEIEGEVAGIVTFGAFVRF-----------GEGLEGLVHISEIDWQLITNPADVLKVG…
>CPR_otherPB_Sungbacteria_GCA_001820605.1
----------M--------------------------------------------------------------DELDSATETKLGV----V-------------------MEK-P-KH----PM----------E-QLLKSRGEFL--NVPKVGEIVEGTAIEKRGAKLFIDL-GNRGVGIVYGLEYYEA--QDLIRNIEVGDRVTAKVIELDNDEGYIELSLREAGREKKWRDLKEKTQLGTTLNIVVKDANRGGLILEHEGVRGFLPVSQLSMKHYPRVENGDKERIFAELQKFIGQELKVKILDANPYEEKLIFSERGGDSDE----IREKLAKYNVGDTVEGEITGVVSFGAFMKF-----------GEGLEGLIHISEIDWQLIEDPKAVLKVG…
>CPR_otherPB_Sungbacteria_GCA_001820785.1
----------M---------------------------------------------------------------------------ETSAA-------------------KTN-G-KH----PM----------E-GLLKS--GIL--RIFRVGEIVEGTVIEKRGSKVFVDL-GQRGTGIIFGREYYEA--QDILKGLSVGDPIAAKVVELDNEDGYVELSLKEAGRERNWQTLKRVLEEGTTVDLKVSEANRGGLIMEYLGVKGFLPVSQLSSNNYPRVQGGDKEKIYEELKKFIGKALTVKIMDVEPMEGKLIFSERSMDDQK----LREKLAHYPIGAEVDGEITGIVDFGAFMKF-----------GEDIEGLIHISEIDWQLIEKPSDMLKIG…
>CPR_otherPB_Sungbacteria_GCA_001820775.1
----------MTILRI----------------------------------------------------------------------MTTDT-------------------KTN-D-KK----PL----------D-IMFKSKNSFS--SMPKTGEIAEGQILEKRGGRIYIDL-GLKGTGLIYGKEYYEA--QELLRGLKSGDTITAKIVDPDNEEGYVELSVKEAGREKNWDDMRKIMETGESLTLKISEVNRGGLVLEYKGVKGFMPVSQLSSKNYPRVPGGDKEKIHEELRKFLNRELTVKIIDVNPAEEKLIFSEKSNESAE----IQQKLSKFKVGDVIEGEITGLTNFGAFVTF-----------DEGLEGLIHISEIDWQLIENPADVLKIN…
>CPR_otherPB_Sungbacteria_GCA_001822345.1
------------------------------MPNNTAAA-----------------------------NNN-----VENEATSRAAFLND---------------------SER-F-RH----PM----------E-QLLKT-APSS--SFIRAGEIVEGEVLGKDGPRLFVDL-GIRGTGIVYGHEYRAA--HDLVKNLKTGGRISAKVVEPDNEEGYVELSLKEAGDEKRWIDLKKNMAEGTLLELPVLEANRGGLILEAFNIKGFIPTSQLSSKHYPRVEGGEKDKILQELQKLIGQIISVKVLDVDQNENKLIFTERGQDEER----LRGALTRYKTGEVVEGEITGVVDFGAFMKF----------NEAGLEGLIHISEIDWSLIEDPRQVLKPG…
>CPR_otherPB_Sungbacteria_GCA_001822345.1_2
----------M-------------------------------------------------------------------------------------------------------S-QE----KQ----------A-LMEGLYNETF--HDIKEGEIVKGRVISVNNKEAVVDI-GFKSEGFVSIEEFRDE---E---KLEAGAEIDVLIESIEDDEGRLVLSHMKAEKLRGWMKMGDVIREGDIVDGRIVKQVKGGFIVDVDGVEAFLPMSLSAFKG------------VSSQE-IMTQKYKFQIAKLNKARRNLILSRREVVQKERELVRDRLWNELVKGQRRTGTVKGITDFGAFIDL------------GGVDGLLHITDMSWTRVSHPSELVKVG…
>CPR_otherPB_Sungbacteria_GCA_001001625.1
----------MSVRAVRVK-RC-------LIVAQFIPL----------------------------VNTLYNNMAVKQKNALTDDAENAAL-------------------KPK-S-IH----PM----------E-QMLKN-GAAL--AFPKIGDIVEGIVLERKGPRIFVDL-GPFGNGVIYGREFYAA--GESARALKPGDTVSVKITSLDNEEGYRELSLREAGEDRKWVELIRLMQEGALLDLAVQEANRGGLILEAHGVQGFLPTSQLTSAHYPRVDGGEKEKILQELQRIVGQTLKVKIIDVNSKENKLIFSERGQEEEA----LRSAFTKYKTGDTVEGEITGVVDFGAFMKF-----------DEGLEGLIHISEIDWTLIENPRLVLKPG…
>CPR_otherPB_Sungbacteria_GCA_001822245.1
----------MS------------------------------------------------------------KKDVDSQSGDTAVSPDERI-------------------PQK-P-RH----PM----------E-ALLKT--SGN--AFVKIGELVEGTVLEKKGTRVYVDL-GPRGMGIIYGREYYAA--QDIIRKAGEGDPIAGKVVEIDNDEGYIELSLKEAGEEKRWIDVKESMEKKELLELPVVEANKGGLLLEYKGIRGFLPASQLSMKHYPRVEGGDKDKIFLELKKFIGTPLKVKILDASPKEQKLIFSEKDSESEE----TRALLLHYKIGDVVEGEVTGVVDFGAFMKF-----------GEDLEGLIHISEIDWGLVENPRDYLKPG…
>CPR_otherPB_Ryanbacteria_GCA_001819935.1
----------MQ------------------------------------------------------------FNAIDKQ-------FTVPT-------------------LPR-K-ER----FM----------D-LLFKQ--SSV--TLPKEGDIVEGKVMKVDGSRVFVDL--VFGTGIVFGREYRLG--KHLLRKVKEGDALSAKVVEVENEGGYLELSVSEADKERVWKQIKKLHNEKAVIELKALEANKGGLVFEWQGIKGFLPVSQLTAQHYPRVDGGDKIKILEELQKFVGQTFSLIVLELSSMEQKLIFSEKGGVPEE----TRKLLESYKVGDVHDGVVSGVVDFGIFVQL-----------EENLEGLVHISELDWSLVENPGDLFKQG…
>CPR_otherPB_Ryanbacteria_GCA_001819945.1
----------M---------------------------------------------------------------IQE-----------NIN-------------------TTK-Q-AA----GL----------T-DVLKKEFAIN--NWPKEGNVVEATLIKKFPRKAFFDL-GRFSTGIVYGVEMINA--RDAIKSLKIGDRVAAKVVSLDGEDGNIELSLAEAGKQKLWQQAKEYLEAGEIIKVKIVAVNAGGLMTSLPGLKAFLPVSQLSLDHYPRVGEADRQKIADELKKFIGQELEAKIIDINPRTNKIIVSEREVLSAN----VKELLSKYQVGQTVEALVSGIADFGVFVRF---------VDNPEIEGMIHISELDYRLVDNPKELVKVN…
>CPR_otherPB_Ryanbacteria_GCA_001003085.1
----------MS------------------------------------------------------------------------------E-------------------KRE-K-ST----IM---------DQ-ELL----GQW--KVPRTGDIVEGVILSKHGSSVFIDL-G-YGTGIIYGKEYQDG--REMLKQKEIGDMVVTKIIELENEDGYVELSVKEAGREKFWKEADAVVAEKRPIALRALEANRGGLVFEWNGTKGFLPLSQLSQKHYPRVEGGDKNKILEELQKFIGQDFMLTIITIDPKEEKIIFSEKSLEPDE----TKEKLAKYEVAGVYEGEISGIVEFGVFVKL-----------EEGLEGLVHISELDWALVENPADLYSVG…
>CPR_otherPB_Ryanbacteria_GCA_001819745.1
M-----ILASMDK---------PEE------------------------------------------KDLF-ETDEDESGSSIA--LDASK-------------------REA-S-RR----LM----------E-ALFKN-IQVA--AAPKLGDLIDGHVIVRKGVYLYVDL-GVYGTGIVYGREYYNA--REIIKNLAPGDAIAAKVVDLENENGYVELSLQEAGQDKMWADAEEHMKNKTPLNLKVTSANKGGLVIVWQSVPGFLPVSQLTAKHYPRVEGGDKMKILNELQKFVGKTFEVTILDIDPKEDKLIFSEKNIESEE----LKEILGHYVVGAEIEGEVTGVVDFGVFIKI-----------EDGLEGLAHISELDWGLVENPGDLFKVG…
>CPR_otherPB_Ryanbacteria_GCA_001819785.1
M---IRILIFMSHDKDTTM-----S------------------------------------------ADVL-TQDTDGISRNLSVD----K----------------FGLEET-T-RR----LM----------D-ALFKS-SGWV--GTSKIGELVSGTVLSRRGPYIYIDL-GPHGTGVIYGREFYNA--RDIIKTLKTGSAVTAKVIEIENEDGYMELSLCEAGKDKMWQEAEALMKSKTPVPLLVVSANKGGLVMNWQGVSGFLPVSQLTAKHYPRVEGGDKGKILNELQRFVGETLEVIILDIDSKESKLIFSEKNVESDE----LKEALSKYQMGDVVEGEVTGVVDFGIFIKI-----------EEGLEGLAHISELDWGLVESPSDLFHVG…
>CPR_otherPB_Giovannonibacteria_GCA_001780515.1
-------MCIMGV-----------------------------------------------------------MDTTTQQDNKQDGA-VSTQ-------------------QVA-V-PH----VM----------E-ELLKT--CPK--IFLKTGDLIDGTVLSKEGACVYADL-GIFGTGIIYGREYQNA--RDFVKKINVGDHMSAKVVEVENEEGMVELSLKEAGEEIAWKEIKELKESGETLELKVTDSNKGGLVIEFRGIKGFLPASQLNAAHYPRVDGGDKEKIAEELGKFVDHPLSVIILDIDPKTQKLIFSEKGIASED----VKKIVEQCKVNDVIEGEVTGIVEFGIFIKV-----------AENLEGLAHISELDWALVENPGNLFKVG…
>CPR_otherPB_Giovannonibacteria_GCA_001778595.1
----------MTANCIHLK----------LTVRPLA---------L--------------------FFS---MSIIKPMVL-----AVLEK-------------------EVK-V-SQ----IM----------E-ELLKT--RPR--GFLKAGDVVDGKIIKKKGAKLYLDL-KNYGTGIVYGKEYQNA--TEIIKTLKVGDKVSGKIVAVENEDGLIELSLKEAGSEMIWKEATTIKAGQDIIDIKVLDSNKGGLVMEWKGIKGFLPASQLKPTHYPRVEGGDKEKISDELKKLVGETLSVTILDFEPKEEKLIFTEKGAGSEE----IKKIVKKYKIEDIVEGEITGIVEFGIFIKI-----------EEGLEGLAHISELDWGLVESPANFFKIG…
>CPR_otherPB_Giovannonibacteria_GCA_001778735.1
----------M-------------------------------------------------------FFYGY-NLSIMPTAT-----ISTDK-------------------DVK-I-NQ----IM----------E-DLLKS--RPR--GFLKAGDVVDGEVIKKQGARLYLNL-KGFGTGIVYGKEYQNA--REIIKTLKTSAVVSGKIVALENEDGFIELSLKEAGSEMIWKEATLIKANQDIIDLKVLDSNKGGLVFEWKSIKGFLPASQLKATHYPRVEGGDKDKISEELKKLVGETLSVTILDFEPKEEKLIFTEKGASSEE----IKKIIEKYKVGDVVEGDITGVVEFGIFIKI-----------EEGLEGLAHISELDWGLVESPSALFKVG…
>CPR_otherPB_Giovannonibacteria_GCA_001780675.1
----------M---------------------DKSF------------------------------------ITIIQSMAL-----VMEKE-------------------AKI-D-NG----IM----------E-GLLQA--KPK--VFLKVGDLVDGLFLFKEGAKAYLDL-NQYGTGIIYGKEYQNA--RELIKNLKTGDKVAAKVVELENEDGLIELSLKEAGSEIVWREINDAKESQETLSIKTLEANKGGLVLEWKGIKGFLPASQLKASHYPRVEGGEKEKIFEELKKLVGETIAVTVLDFEQKENKLIFSEKGTESEI----LKKMVEKYKVGDEIEGEITGVVDFGIFIKI-----------EEGLEGLAHISELDWALVEDPNALFKVG…
>CPR_otherPB_Giovannonibacteria_GCA_000998625.1
----------M------------------TILDNCSK-----------------------------------MLIIQSMAN-----AMEKD-------------------IKP-N-NG----IM----------D-ALLKA--RPK--VFLKIGDLIEGCVLEREGAKVFLDL-GIFGTGIIYGQEYQNA--RELIKNLKPEDKVTAKIVELENENGFVELSLKEAGSEMIWKEAKELKGSQEALNLKVLEANKGGVVLEWRGIKGFLPASQLKASHYPRVENGEKEKIFDELRKLVGEAISVTILDFDPKENKLIFSEKGAESED----LKKVVGKYKVGDIIEGEVTGVVDFGIFIKL-----------EEELEGLAHISELDWALVENPNALFKVG…
>CPR_otherPB_Giovannonibacteria_GCA_001778465.1
----------M------------------TILDNFSK-----------------------------------ITIIQSMAT-----ATEKD-------------------IMS-S-DS----AM----------E-ALLKA--RPM--AFLKVGNLIECTALEREGAKMFFDL-GAYGTGVIYGKEYQNA--KELIKNLKIGDKITAKIVELENNDGLVELSLKEAGSEMMWKNAKELKDAQEIINLKVLEANKGGVVLEWRGIKGFLPASQLKSAHYPKVEGGDKDKIFDELTKLVGETIGVTILDFEPKEDKLIFSEKSAESED----LKHIVAKYKIGDTIEGEITGVVDFGIFIKI-----------EENLEGLAHISELDWALVEDPNALFKVG…
>CPR_otherPB_Giovannonibacteria_GCA_001004655.1
----------M----------------------------------------------------------LFPMPQKSVNLAEFS---EFEI-------------------SRK-K-SG----LM----------E-ELFKK--IPV--SLPKVGELVESKYLGRKGTKVFLDL-DPYGSGIIFGNEFFLA--RDLIKNLKPGEKVTAKVVELEGEDGCVELSLREAGADLIWKEAEELAKKKEILSLTVLDANKGGLVLEWKKIKGFLPASQLKIGHYPRVEGGDKSRILDELRKFIGTELGVTILAFDPREAKIIFSEKGAESDE----MKELAANYKAGDIIEGEITGVVDFGVFIKL-----------QEGLEGLCHLSELDWSLVENPAERFKVG…
>CPR_otherPB_Giovannonibacteria_GCA_001004655.1_2
-----------------------------MVTKTASQ-----------------------------------GTEVEEIIDTEK---ETSE-------------------PAP-K-MG----PM----------D-ELLKN---AQ--KRPQLDEVVEGPVVAVGRARVFVDL-PPFGTGIIYGREYLSA--RETLKNVNIGDLITAKVVGIEEADGYFELSLREARAALMWNEAEQALQKKTVFELPVRDANKGGLIIEWQGIQGFLPASQLAPAHYPRVHDGDKDKIFAELKKLVGEKLELLIITASPKEQKLIFSEKGAGSSD----RTALVESYHVGDVLDGIVTGATEFGIFVKL-----------EEGLEGLVHISEMDWALVENPKTRYKVG…
>CPR_otherPB_Giovannonibacteria_GCA_000998435.1
----------MN-------------RGLALFLRKFKS-----------------------------FDTLILMSGTNATNVILS---EVDS-------------------KRK-K-SL----IM----------D-ELLKK--IPI--ELPKPGELVEASMVGRKGSKVFFDL-GVFGLGMVYGREFLKA--REIIKSLKPGDRVTAKIVETENEEGNAELSLKEASQDLIWKEAEDAMRKKESLELAVLEANKGGLVMEYKRIKGFLPASQLKTSHYPRVEGGSKDRILEELKKLEGQTLNVVVIAVEPKEEKIIFSEKGAESEE----LKEIAAKYEAGQIVEGEITGVVDFGIFIKI-----------EEGLEGLCHLSELDWSLVENPAERFKIG…
>CPR_otherPB_Giovannonibacteria_GCA_001778985.1
M---------M---------------------------------------------------------------------------LVTDL-------------------GLK-K-NN----LM----------D-GLWKK--MPL--VLPKADDLVQAKFLERSGAKAFFDL-GAYGCGVVYGREYILA--RDIVKNLKPGEVLPAKIVELENEDGYVELSLREAGRDLVWFEAEELMKKKEVLELEVLEANKGGLVLEWKKIKGFLPASQLKTSHYPRVEGGDREKIFQELKKLEGQKLSVTIIAFDPREDKIIFSEKGAETAE----LKELTAKYAAGQIIEGEITGVVDFGIFIKL-----------EEGLEGLCHLSELDWSLVQNPHELFKVG…
>CPR_otherPB_Giovannonibacteria_GCA_001778785.1
M---------M---------------------------------------------------------------------------LNSTS-------------------NPA-K-NQ----VM----------D-ELWKK--ITI--VLPKPDDLIEARYLERSAARAFFDL-GPIGTGMVYGREYMVA--RDIIKGLKPGDKVMAKVLESENEEGCVELSLREAGRDLVWLEAEDLMRKKEAVELEVLEANKGGLVLEWKKVKGFLPASQLKTSHYPRVEGGDKDRIFQELKKLEGQKLMVTIITMDPKEDKIIFSEKGAESSD----LKELASKYEVGQIIEGEITGVVDFGIFVKL-----------EDGLEGLSHLSELDWSLVQNPHEHFKIG…
>CPR_otherPB_Giovannonibacteria_GCA_001778905.1
----------M----------------------------------------------------------LFPMSNIYANTAVLL------P-------------------EKK-K-SQ----VM----------D-DLWKK--ISI--SLPRVDDIVEAKFLEKSGARAFFEL-GTMGCGKVYGREYILA--KDIIKTLKKGDAVMAKVLDLENEDGYVELSLRDAGKDIVWKEADELMKKKEVLELTVIEANKGGLVLEWKKIKGFLPASQLKTSHYPRVEGGDKERIFTELKKLDGQKLGVTIIAIDPKEDKIIFSEKGADAAD----LTALTSKYQIGQVIEGDITGVVDFGVFIKL-----------EEGLEGLSHLSELDWSLVQNPHELYKIG…
>CPR_otherPB_Niyogibacteria_GCA_001819395.1
----------MK-------------HKLALKTRKAVIS---RIDGLK--------------------SSLY-TQSMDMNSVKDAGQ-LVEA-------------------KKA-E-LS----LM----------E-YLFKS--MAQ--VSPKTGDFIEGMVIARKKSALYIDL-GPIGTGIVYGREIISA--RDMVSNIRIGDRVTAKVIMPENEDGYVELSLKEAGLEIVWREARDLAERKIPLELKIKEANKGGVVIEWEGIQGFLPASQLRSIHYPRVEGGDKEKILEELKKMIGQPIVVTIITADQEEGKLIFSEKETQTEE----FKEVLSKYKVGDTIEGEITGVVDFGVFIKI-----------EEGLEGLSHISELSWSLVEDPRTLFRVG…
>CPR_otherPB_Niyogibacteria_GCA_001821615.1
M---DLVLLGMPI---------------------------------------------------------------------------------------------------Q-Y-SG----AM----------N-YLLKK--YPL--SVLKQGDVLEGKVLSMEKSRLFVDL-GEFGIGAIYGAELMKA--KNLVNKLKTEDKIYVKVLVVENEDQYVELSPKNAGLETAWEKAEDFMKKQTPVELRAEDANKGGLILNFNELQGFLPTSQLKSEHYPKIESGDKDKILEALKKLVGETFKVTIIDADKDQEKLIFSEKELNSEE----INEKISKYKIGEEIEGEVSGTANFGIFVKI-----------EPGIEALSHISELSWGLVENPASLFKVG…
>CPR_otherPB_Tagabacteria_GCA_000997345.1
M---SAGTKMLQIFFIFVN--------------------------I---------------------LFVM---------------LKNEE-------------------KRN-K-AT----PT----------E-FFLKS--VDI--IFPRLGDVVEGKVIEQKGPALYIDL-GALGSGIIYGREFINA--RDIIKSLKPGDVISAKITEFENEDGYIELSLKEAGMEIVWREVESLMKNKELLELTVTEANKGGLIMEWQGLRGFLPASQLSPSNYPRVDGGDKEKIFKELQKMIGRVLKVAIIGCDKKEQKLIFSEKESDSSA----AKEALSKYKIGDEVSGEVTGIVDFGIFIRI-----------KENLEGLVHISEIDWSLVEDLSRLFKIG…
>CPR_PB4_Vogelbacteria_GCA_001823025.1
M--------ILSK---------VGSKEAADTTEVKEV-----------------------------------EGVKVESKDKKP---VAER-------------------PLA-P-RG----PM----------D-EVFKG---SS--PRPEAGSLVEGPVIGKGKLELYVDL-PPYGTGLIFGREYLNA--RDIIKKVNLGDTVTAKVVAAEGERGYVELSLKEAKQAIIWHDAEKAAKTKTVFELPIKEANKGGLIVEWQGIDGFLPASQLSAEHYPRVDDGDKDKIMEALEKLVGQTLALSVITADPKEGKLIFSEKNLDNEA----RRELVDKYALGETVEGEVTGAVDFGIFVKL-----------EEGLEGLVHISELDWALVENPRELYKPG…
>CPR_PB4_Vogelbacteria_GCA_001823065.1
----------MN--------------------------------------------------------TLKSDEVSKTNMADPV---DADK-------------------DSQ-P-KG----VM----------D-EIVRQ---TQ--IKPTPDMLIEGTVLGKEKMTLYVDI-SPFGTGIIFGREYLNA--RDIIKKVNFGDSVTAKVVETEGKNGYIELSLKEAKQAIMWDAAEKAMKHKEVFLITVKEANKGGLILEWQGMDGFVPASQLKPEHYPRVADGDKDKIVNELEKLIGTQLEVSIIGIDPKEGKLIFSEKTTDNKS----RKEIVDRYGLGDVIEGEVTGAVDFGIFIKI-----------EEGLEGLVHISELDWSLVEDPRSLYKPG…
>CPR_PB4_Vogelbacteria_GCA_001824825.1
---------ML-------------------------------------------------------------LMTTDTAVMTED---RSVV-------------------DKT-P-VS----LM----------D-SLVRT---TP--ERPEVDTLIDGVVIAKDKMAMFVDL-PPFGTGLIFGREYLNA--RDLIKKINIGDTVTAKIVATEGENGYLELSLKEAKQAILWDSAERAMKNKEIFSLVVREANKGGLILDWQGIDGFVPASQLKPDHYPRVPDGDKDKIADELAKLVGSPLEVSIIGIDPKEGKLIFSEKTLDSKS----RKEIVNKYVLGDVVEGEVTGAVDFGVFLKI-----------EEGLEGLVHISELDWSLVEDPRSLYKPG…
>CPR_PB4_Vogelbacteria_GCA_001823055.1
M--------FMN------------------------------------------------------------QKLVEIENEEAV---GGVG-------------------KVA-V-RA----TM----------E-EVTKN---SS--ALPDVGALVEGRVIAKEKMSLYVEI-IPFGTGIIFGREYLNA--RDVIKKVNIGDLVTAKVVALEGEEGYFELSLKEAKQALVWSDAEKAIKSKAVFDVMVKDANKGGLIMEWQGIDGFIPASQLKADHYPRVTDGDKDKIADELKKLVGKMLSVSIITADPRENKLIFSEKNQDNKA----KKTLIEKYSLGDIVDGEVTGAVDFGIFIKV-----------EDGLEGLVHISEIDWSLVENPRDVFKVG…
>CPR_PB4_Nomurabacteria_GCA_016699365.1
---------MIS---------VQGVYGITLLGEK--------------------TQNTHIQK------GFS-AADFLFYMKKKT---EQKV-------------------EAI-V-LT----GT----------D-AILDT---AQ--PRPEVESLVEGPVIAIEKSAVYVAL-EPFGTGVIYGREYNNA--RDIIKKINIGDVIKAKIVEVENEDGYTELSLKEAKQALLWGEADVAIKEKTIMDILVKEANKGGLIMEWQGIAGFLPASQLKPEHYPRVEDSDKDKILKELKKLVGKKLSVIIISALPKEGKLIFSEKDNNPEE----RKEIVGKYTVGDELEATVAGIVDFGVFLKI-----------EEGLEGLVHISEVDWGLVEDLRSMFKVG…
>CPR_PB4_Nomurabacteria_GCA_016699085.1
---------MWNNPFGRNN--------------------------------------------------FI-YMPKVKSDDTKK---DKEV--------------------PE-K-LT----GT----------K-ALLDG---AA--LRPEVDALVEGPVIAVEKASVYIDL-APYGTGIIYGREFINA--RDIIKKINIGDAIKAKVVESENDNGYIELSLKEAKQALIWSDAERAISEKSLLEIMVKEANKGGLILEWQGIQGFLPASQLKPEHYPRVEDSDKEKILRELKKLVGKKLSVIMISALPKEGKLIFSEKDNNPEE----RKEIIGKYNIGDELDTTVAGIVDFGVFLKI-----------EEGLEGLVHISEIDWGLIEDLRSMYKIG…
>CPR_PB4_Nomurabacteria_GCA_001871775.1
---------MFLAPL-------------IFMSTK-----------------------TNDTAIDVE--EIK-QLALSDKKEGKG---ISEE-------------------TLA-D-TS----TM----------G-IMMKH---VA--TPLSVGDLAEGAVIDVERSAVYIDL-APFGTGIIYGKEFMSA--RDLIKKISVGDSVTAKVIARENEDGYIELSLQEARRALVWSQAEEAIKSKLVFELPIKEANKGGLIIEWQGMQGFLPASQLKPEHYPRVENGDKNAILEELKRLVGEKIAVSIISADPKEGKLIFSEKDSTQKE----RSQIVSKYTIGDEIEGEVTGIVDFGVFLKI-----------EEGLEGLVHISEIDWGLVEDPKKIFRVG…
>CPR_PB4_Nomurabacteria_GCA_001785725.1
----------M-----------------------------------------------------------Y-QNGVTRN-----------KLY-----------------IVK-E-NS----VL----------Q-PLIEK--DER--KDLHVDDLVEGFVVAIEGACVFVDI-PTFGTGIIYGREFIST--RDVIKNLNIGDSIKGKIIELENAEGYIELSLKEARQAIIWKEADEAIKNKSLFPVIVKAANKGGLMVEWQGIEGFLPASQLSADNYPRVEDGDKDQILKELKNLVGKTLSLCIISSNPKEGKLIFSEKGGDTEV----KSEIIGKYNVGDEVEGTITGAVDFGLFVKI-----------ENGLEGLVHISEIDWSLVEDPKKLYDIG…
>CPR_PB4_Nomurabacteria_GCA_001786825.1
----------------------------------------------------------------------------------------------------------------------------------------------------------------------------------------------------------------------------------------------------------------------------------------------------------------------------------MNADIQKAQDEFWAKVKANEILLGKIKAIVRYGAFVTL------------AKIDGLLYIKDIAWEKIKHPDEKLQVG…
>CPR_PB4_Nomurabacteria_GCA_000991735.1
-------------------------------------------------------------------------MKKDENDVVSN---IAEH-------------------AKI-E-LS----SI----------G-KMLDK---AE--IPPQVDALVEGPVISIQKSSVYIDL-APFGTGIIYGREFINA--KDIIKKINIGDVVKAKVVDTDNEDGYIELSLKEAKQALIWSEADKAIKSKVALELTVKEANKGGLILDWQGIAGFLPASQLKSEHYPRVEDSDKDKILKALKMLVGKRISVVMISALPKEGKLIFSEKDNNPEE----RKEIIGKYGVNDEIECTVAGIVDFGVFLKV-----------EEGLEGLVHISEIDWGLVEDPRSMFKVG…
>CPR_PB4_Nomurabacteria_GCA_001785485.1
---------MFPVP-------------------------------------------------------------------IEK---KMPL-------------------NMN-E-EL----TL----------K-SIIEN---SP--VGPQLEALVEGTVIGIKKSSVYIDL-APFGTGIIYGREFIAA--RDIIKKISIGDTVKAKVVEVKNEEGYVELSLKEAKQALIWSEAEKHIKAKTVLEIPVKEANKGGLILEWQGIQGFLPASQLRSENYPRVTDSDKDKIMVELKKLIGKKLTVTILTAIPKEGKLIFSEKENNPEE----RAETLSKYNVGDELPCEVSGIVDFGVFLKI-----------EEGLEGLVHISELDWGLVEDPRQLFKLG…
>CPR_PB4_Nomurabacteria_GCA_001785575.1
---------MMYLNIIRRS------YPRHRATRCNPYS------GL--------IGTLEASANSAD--FIF-MNDTNNTSNANG---ADDI-------------------IIH-K-VS----EA----------K-SLLEK---TG--DKPAIDTLVEGPVISITKSAVYVNL-GPASTGIIYGREFMVA--RDIIKKVAVGDSIKAKVVDTENENGYVELSLKEAKQALIWSEADKLIKAKTPIEVVVKDANKGGLIIEWNGIMGFLPASQLSPENYPRVADSDKDKIHTELKKLVGQKLNLTMISALPKEGKLIFSEKTGEDAG----RGEMLIKYNVGDEVETSVAGIVDFGVFLKL-----------EDRLEGLVHISEIDWGLVDDTRSRFKIG…
>CPR_PB4_Nomurabacteria_GCA_000998345.1
--------------------------------------------------------------------------------------------------------------------------------------------------------------------------------------------------------------------------MALSLKEAKQAQIWNEAEQVIKEKKLLELPIKDANKGGLILEWQGLQGFLPASQLKVDHYPEVPDGDKDQILRELKKLVGQKISVNIISILPKENKLIFSEKETGSEE----QKSIVAKYSVNDELECAVTGVVDFGVFLKL-----------EEGLEGLVHISEIDWGLVEDLRNMIKVG…
>CPR_PB4_Nomurabacteria_GCA_001785415.1
----------------------------------------------------------------------------MIPFMSIK---EKV--------------------------TP----AP----------S-FVMMF---EV--APLETESLIEGPVIEIKRNSVFVDL-GHWGTGIIYGREFLNA--KDIIKKIKVGDIVKAKVIERENEDGYVELSLKEARQAILWNEAEDAIKDKIVFEMPIKEANKGGLILEWRGIPGFLPASQLKPEHYPRVLDGDKDKILKELKKIVGQKISVIIISVDPKEGKLIFSEKDSNPKE----AEKIIGKYNVGDELECVVTGVVDFGIFLKI-----------EEGLEGLVHISEIDWGLVEDPRSMHKVG…
>CPR_PB4_Nomurabacteria_GCA_001786225.1
----------MN-----------------IGKPK----------------------------------PYICIILSGFFSKKMA---TKEK-------------------TLT-D-NA----VQ----------K-SILDR---SG--QKPEADSLIEGAVILVEKSSVFVDL-APWGTGIIYGREFQNA--KDIIKKINLGDIIRAKVVETENEDGYIELSLKEAKQALTWSEAEQAIKQKTVIELPVKDANKGGLILEWQGLQGFLPASQLKAEHYPRVLDSDKDKILKELKKLVGEKISVMIISTLPKEGKLIFSEKDNNPDE----KKEILSKYNVGDDVLCVVAGIVDFGVFLKL-----------EEGLEGLVHISELDWGLVEDPRTMFKVG…
>CPR_PB4_Nomurabacteria_GCA_001786805.1
M--------SLNI-------------------------------------------------------IFIRIFNFMIKEKKVA---EQVE-------------------PVV-E-NL----VL----------S-SIVNR---SV--NKPEIDSLVEGAVISIEKSSVYVDL-APYGAGIIYGREFINA--KDIIKKISPGDVIKAKVVDTENEDGYIELSLKEAKQALTWKEAEVAIKEKKVMSLEIKDANKGGLILEWQGIQGFLPASQLKAEHYPRVLDSDKDKILKELKKLVGQQISVMIISTLQKEGKLIFSEKDNNPEE----KKEILSKYAVGDELECAIAGLVDFGVFVKL-----------EDGLEGLVHISELDWGLVENPRTMFKIG…
>CPR_PB4_Yonathbacteria_GCA_001823595.1
---------------------------------------------------------------------------------------------------------------------------M----------H-ELLKR---VP--TPPKLGDLIEGPVISIDKAAVYINL-KPFGTGIIFGREYLQA--RDVLKKIAIGDTISAQVVDAHNEDGYVELSLHEARQALIWTEAEDAIKKKLVVELPIKDANKGGLILEWQGIAGFLPASQLKPEHYPRVEDGSKDRILEELKKLIGEKLTVTIIGADQKEGKLIFSEKDSGQKE----KREMVEKYAVGDERDGTVTGIVDFGVFVKI-----------EEGLEGLVHISEMDWALVENPRTLYKVG…
>CPR_PB4_Yonathbacteria_GCA_001823545.1
M------APIIRKASAKIR------LFRSLYTRK-------SFYGMLLILIRPTCTDPNSIVPLAGLHIFM-LVSGFFCIIMTD---KEKQ-------------------IEV-P-VS----FM----------A-TLLES---VQ--NPPEVDALVEGPVLGIAKSSVYIDL-GPFGTGIIYGAEFINA--RDVIKKLNVGDVVTAKVVDMNNEEGYIELSLKEARQALIWTEAEEAIKIKKILDLPIKDANKGGLIVEWQGIQGFLPASQLKSEHYPRIENGDKDKIMGELKKLIGKRLAVIIISASPKEGKLIFSEKEQGTRE----KREITGKYSIGDELDGTVSGLVDFGIFVKL-----------EDGIEGLVHISEIGWGLVDDPRKLFKIN…
>CPR_PB4_Yonathbacteria_GCA_001823575.1
M---KGP-PFVKLAFLLAF-YIVNSDPDTTVPEKPEVH-------LPPHGTARPYDDTKGVGACPGIFNFM---------KATE---EEIV-------------------VEA-P-AS----FM----------A-TLMEG---VK--DLPEVDALVEGPVLGVEKSSVYINL-GTFGTGIIYGREFINA--RDVIKKLNIGDTITAKVVDTENVDGYIELSLKEARQAIIWSEAEEAIKSKKALELPVKDANKGGLIVEWQGIQGFLPASQLKSEHYPRIDDGDKDKILVELKKLIGKRIAMTIISASPKEGKLIFSEKEQGVKE----KREISGKYSQGDELEGSISGLVDFGVFVKL-----------EDGIEGLVHISEIGWGLVEDPRKIFKLG…
>CPR_PB4_Yonathbacteria_GCA_001823495.1
M--------VLRYVGLMGF------LFYFQTSER---------------KNTNFYFRTSAENIVPS--YIM-KKDTDESVDSRL---GREQ-------------------VDA-P-LS----FM----------A-TLMAD---VK--ALPENDSLVEGPVISVAKSCVYVNL-GPIGTGIIYGREFINA--RDVIKKLNIGDTITAKVVDTNNEDGYIELSLKEARQAIIWSEAEEAIKSKKTLELPVKEANKGGLIMEWQGIQGFLPASQLKSEHYPRIDDGDKDKILSELKKLIGKRIAVTIIGASPKEGKLIFSEKEQGVKE----KREISGKYSNGDELDGTISGIVDFGVFVKL-----------EDGIEGLVHISEIGWGLVDDPRKMFKLG…
>CPR_PB4_Lloydbacteria_GCA_001819075.1
---------MITVETKKVE------------------------------------------------PAMA-GSSVHTGAPTQM---KNGG-------------------TGM-H-TS----PM----------V-DIVEA---SA--RHPEVGVLVEGTVIAIEKNSLYVDL-GPIGTGIIYGSEFISA--RDTIKKIRVGDSIAAKVVERENENGYVELSLKEARQALIWEEAEDAIQKKTPFELIVKEANKGGLMLEWHGIKGFLPASQLSQEHYPRVENGSKEKIFSELQKFIGEKLTVFVLTADPKEDKLIFSEKGSEEKE----HTERAEKYAVGQIIEGEVTGIVDFGLFVKI-----------EEGLEGLVHISEMDWGLVQDPRAMFKIG…
>CPR_PB4_Lloydbacteria_GCA_001821435.1
------------------------------------------------------MGKRNACGIFSIF--IM-TTKTTEEEIIIV---GGEH-------------------IPS-P-DH----VM----------A-KYMAE---IG--KVPEPGELVEGAVIKVDKKAVYIDM-APFGIGLIFGREYQNA--RDLIRHMNVGDKVTAKVVDAENEDGYIELSLKEARQSLIWADAEDLVKKKTIVELPVKDANKGGLILDWQGISGFLPASQLSGDHYPRVSDGDKDKILDELKKLIGEKLSVVMITAVPKEGKLIFSEKEHNQKE----KEEIVAKYQLGAIVDGEITGVVDFGAFMKI-----------EEGLEGLIHISEMDWGLVDDPRKLFKVG…
>CPR_PB4_Lloydbacteria_GCA_001818935.1
---------MLENP------------------------------------------------------KLK-TPLLAVFFMVNT---TEEK-------------------EIT-A-EG----PM----------K-DFLEK---SG--HTPEVDDLVEGPVIAVEGGFVYVDL-KPFGIGVIYGIEYMNA--RDVIKKINLGDIIKAKVVEKENDDGYIELSLKEARQALIWNEAEIAIREKRGIEVQVKEANKGGLIMEWQGIAGFLPASQLKAEHYPRVEDGDKEKILRELKKLVGTRISVSIISASPKEGKLIFSEKDLDQKD----KQEIIEKYALGDEIDGTVTGIVDFGIFLKV-----------EEGLEGLVHISEIDWGLVEDPKALFKVG…
>CPR_PB4_Campbellbacteria_GCA_016699465.1
----------MHN-------------------------------------------------------IRH-IMTTRTHTSPDD---GDVK-------------------DKK-A-DH----MM----------N-EFLIQ---TK--NPPVVGDIVEGHVIALHKSSVFVDI-APFGTGIIFGREFNNA--RDIIKNISIGNEVTATVVDINNADGYFELSLREARQALIWSEAEKAVREKISFVLPIKEANKGGLILEWQGIAGFLPASQLSTDNYPRVEGGDKDRIFDELQKLVGQTLQVTLITADPKEGKLIFSEKGTDQKE----KQVLVSKYAVGDDVEGEITGIVDFGVFIKV-----------EDGLEGLAHISELDWGLVDNPRKIFTVG…
>CPR_PB4_Campbellbacteria_GCA_001774455.1
----------------------------MMITETKTLE----------------INKINDD-------DLK-KDKDISNLSKIK---LKKQ-------------------NGK-K-DS----GM----------A-KLLND---TP--PPPDVGDLVEGPVIDIEKSSVFIDL-HPFGTGIIYGKEFLQA--SDVLRKVNIGDNIAAKIIDKNNKDGYIELSLKEARQALIWSEAEHAIANKTIFEAPIKEANKGGLILEWQNIQGFLPASQLKSEHYPKIEDGDKEKILNELKKLVGRKLSVSIIAVDSKDGKLIFSEKNPEKKD----VEKIINKYEVGDELEGEVTGTVDFGVFVKL-----------EENLEGLVHISEIEWGLVDDPRALFSVG…
>CPR_PB4_Campbellbacteria_GCA_001774495.1
----------MEKDSTFIH--------VFKMTTK--------------------------------------KEEVEEIEEVEK---AEEQ--------------------PK-K-NN----FW----------T-KFIDE---NI--KIPATGDLVEGDVIGIDNNSVFIDL-SPFGTGIIYGREFMNV--RDVIKNLSIGDSIAAKIVEKENKDGYIELSLKEARQAFVWGEAEKVMKEKKVLELVIKEANKGGLLISWQGINGFLPASQLSTEHYPRVDEGDKNKILDELKKLVNAKVQVQIIGVEPKEGKLIFSEKNINQEE----KDTIIDNYKVGDELEGEITGIVDFGIFAKI-----------KGDIEGLIHISEISWSLVEDPRSLFKVG…
>CPR_PB4_Campbellbacteria_GCA_001774475.1
---------MTESKSTFIY----------QMTDK---------------------------------KTSA-QAEEKEIEKISE---KTED-------------------AKK-E-SS----LM----------A-SLVND---TP--NPPVNGDLVEGKVVGIDKNAVYIDL-PPFGTGIIYGREFLNV--RDVVKNLNIGDVINAKVVEAENKNGYVELSLKEARQALVWNEAETVMKEKQILELTVKEANKGGLIINWQGISGFLPASQLSSENYPRVADGDKDKILEELKKMVGTKISVQIIGVEPKEGKLIFSEKNIGHEE----RQEIIQKYKVGDEVTGEITGIVDFGIFIKL-----------DGEIEGLVHISEMSWSLVENPRDLYKVG…
>CPR_PB4_Campbellbacteria_GCA_000990765.1
---------MV------------------LLIQK-----------------------------------IK-MTKKDVNPEVEV---STNE-------------------EVK-K-DG----IM----------T-ALIEK---TP--TLPAIGELIEGKVIGIEKNGVFIDL-PPFGTGIIYGKELISV--RDVIKNLNIGDTVDAKIVDVENEDGYVELSLKEARQALVWTEAEKAMKEKQVLELSIKEANKGGLLINWQGISGFLPASQLSSENYPRVADGDKDKILEELKKMVGSKIAVQIIGVEPKEGKLIFSEKNINQGE----REEVIQKYNVGDEMEGEVTGIVDFGIFIKL-----------DGNIEGLVHISEISWSLVENPRELFKIG…
>CPR_PB4_Kaiserbacteria_GCA_017134395.1
---------MVQNVWYINY-----------------------------------------------------MSKKDELEESSN---EQEP-------------------RSK-K-DS----PM----------A-ALLSE---IP--ASPELGDLVEGPVVDIDKGRIYIDL-HPFGTGIIYGREYLSA--RDILKNVNPGDTVAAKVSGIENPDGYIEVSLREARQALVWGEAEAAMKNKTPLELPIKDANKGGLIVEWQGIQGFLPASQLSVDNYPRVPDGDKDKIFAELKQLVDKKLTLHVITADAKEQKLIFTEKGIDAEE----KAEMVDKYRVGDAHDGEITGATDFGVFVKL-----------EDGLEGLVHISEMDWALVEDPKSRYTVG…
>CPR_PB4_Kaiserbacteria_GCA_016699245.1
M---RICVRIISSNGMRVI-VCTHRDNTIMSDEKSVLD--------------RIAAAVRG--------TVA-PVKEAEELDEKQ---AAAE-------------------AAR-I-KS----PM----------N-QLVEG---SP--VPPKDGDLVEGKVSAIGRARVFVEL-VPFGTGIIYGREYMNA--RDILRKVSVGDTIAAKVVDAGNEDGYIELSLKEARQALIWSDAEDAVKKQTIMSLLVKEANKGGLIIEWQGIQGFLPASQLSAEHYPRVEDGDKDKILTALNDLIGKSLSVIMITADQKEGKLIFSEKGPQEDE----KEQKVSRYNVGDVLGGTITGAVDFGVFVKL-----------EEGLEGLVHISELDWGLVEDTRSLYKVG…
>CPR_PB4_Kaiserbacteria_GCA_001781435.1
---------MIKSMVFEVT------KGYQLMDEK------------------------------------L-ATASAIEEEDSL---SLKK-------------------HKK-K-EG----PM----------G-AIFLE---SP--LPPVPGDLIEGAIIKVEKARVYVDL-HPFGTGLIYGREYLNA--RDILRKVNVGDAISAKVVEVDGRGGYIELSLKEARQAVIWSEAEQAINNKTVFELPVKDANKGGLILEWQGIAGFLPASQLKTGHYPRVEDGDKDRILEELRKLVGEKLAVSIITADAKEGKLIFSEKDPELKE----KEKIIDRYAVGDQVEGTVTGLVDFGVFVRL-----------EEGLEGLVHISEIDWGLVENLHALFKVG…
>CPR_PB4_Kaiserbacteria_GCA_001781215.1
---------MINSR-----------FSLTLSTEKRQV---------------RQIARKATLSM---------KITKEKKEAEEQ---LEQA-------------------EAK-S-TH----VM----------T-DLITQ---SQ--TPPSVGDLVEGPVIVIDRSRVFINL-PPFGTGIIYGREFMNA--RDILRKVNIGDSIAAKVVTMEGIDGYIELSLKEARQALIWAEAEEAISGKKVLELPVKDANKGGLILEWQGIQGFLPASQLKSEHYPRVEDGDKDRILEELKKLVGTRLSVSIITADPKENKLIFSEKDPEEKE----KGVLIDQYSVGDIIEGEVTGTVEFGVFVKL-----------QEGLEGLVHISEIDWALVDDPRTRFKIG…
>CPR_PB4_Kaiserbacteria_GCA_000998805.1
---------MYDTQHLRLF-------------------------------------------------SIHETEVQKVKIDGEN---DILG-------------------NTT-D-LS----QM----------A-VFLEK---SP--LPPGEGDLVEGPVVATAKNKVFIEL-HPFGTGIIYGREFLTA--SDILRRVKPGDTIAAKVVGTANSEGYIELSLMEARQALIWAEAEKAVAKGTVFEVLVKEANKGGLMLEWQGVTGFLPASQLKPENYPRVEDGDRGKILEELKQLVGHKLSVVIITADAEENKLIFSERGPQ-EE----KGSTTERFAVGDTVEGEVTGAVDFGIFIKI-----------DEGLEGLVHISEIDWGLVENPKSMYKIG…
>CPR_PB4_Kaiserbacteria_GCA_001779615.1
---------------------------------------------------------------------------------------MEIT-------------------ETK-T-PS----IM----------E-ALLAE---SQ--TPPGVGDTVEGPVISIGSGKIYINL-PPFGTGIIYGREYLAA--RDVLRKVALGDTISAKVIGGAHKEGYIELSLKEARQAMIWSDAEKAIATGTIFELPVKDANKGGLIIAWQGIQGFLPASQLKPEHYPRVANGEKQLILDELKKLIGGNLSVSIITADPREGKLIFSERGSSKDS----RESLVDQYAIGDVVEGITTGVVDFGIFVKV-----------EEGLEGLVHISEIDWGLVEDPRLFAKVG…
>CPR_PB4_Kaiserbacteria_GCA_001781205.1
----------MECNFFQLF---P--LSLYSMTEK---------------------------------KSII-TRIASALRMSDD---EAVE-------------------TTA-P-AT----IM----------E-TLADT---IS--AGPQVDDVVEGVITAIGRSAVYIDL-VPFGTGIIYGREFMNA--RDVLRKASIGDTISAKVTAIEHEDGYIELSLKEARQALIWTEAERLVKEGTILSLEVKDANKGGLILEWQGITGFLPASQLSHEHYPRVQDGDKDKIFTELKHLAGQFISVVAITADAKEQKLIFSEKRTKKGD----TAVRTGTYAVGDIHTGEVTGVVDFGIFVKL-----------EEGIEGLVHISEIDWGLVEDTRSRYAVG…
>CPR_PB4_Kaiserbacteria_GCA_001779595.1
----------MT---------------------------------------------------------------------------ETNT-------------------TPE-N-IG----VM----------Q-KFINE---SP--EPPKVGDVVEGTVSAIGRARVFVDL-SPFGTGLIYGREYMNA--RDILRKVSVGDTIGGKIVDTGNEDGYIELSLKEARQALIWSDAEAAVKNQTVFSLLVKEANKGGLILEWQGVQGFLPASQLSTENYPRVADGDKDKILTELNSLVGKFLSVVIITAEAKENKMIFSEKSQQEKE---NKEEKVSRYEVGDVLDGEVTGTVDFGVFVRV-----------EDGLEGLVHISELDWGLVENPRTLYKIG…
>CPR_PB4_Kaiserbacteria_GCA_001783565.1
M---HFVRRLLVSSDTRLT---AGRIQRIFLPREMV---------------------VRTR-------VVG-SKHIYMSDVTTP---VADS-------------------TEA-K-GG----VM----------Q-LLAAN---LP--DAPKEGQLIEGTVSAIGRARLYVDL-PPFGTGLIFGREYMNA--RDILRKVSVGDTIAAKIVDTANEDGYIELSLKEARQALIWADADEAVKRGTVMSLEVKEANKGGLIIEWQGIQGFLPASQLGSDNYPRVDNGDKDKILHALNSLVGKHLSVVMITADQKEHKLIFSEKGPEKEE----KEEKVGRYEVGEILNGEVTGAVDFGIFVKI-----------EQGLEGLVHISELDWGLVEDTRTLYKVG…
>CPR_PB4_Kaiserbacteria_GCA_001781625.1
-------MRLFGKEHRKSS-----SDGLTLGVER------------------PQYPNRKSAP------FYI-MSELETAAPKAA---IPAF-------------------VID-P-GH----PM----------A-GLIEG---IP--TPPKAGDLIDGTIVAIARGKVYVDL-PPFGTGLIYGREYLNA--ADVLRKANTGDAITAKVVDPAGREGYIELSLKEARQAAIWGEAEQAIVAGTSYMLSVLEANKGGLILSWQGIQGFLPASQLAKEHYPRITDGDKDKILTELQKLVGQSLSVRIITADAKEGKLIFSERMGEEEE----KASLIDKYQVGDVLAGEVTGVVDFGVFVRV-----------EPGLEGLVHISELDWGLVEDPRTLFKVG…
>CPR_PB4_Kaiserbacteria_GCA_001781305.1
------------------------------MCKGSV----------------PFS-KIRTA-------VYM-FEEVKKVT--AP---IATI-------------------HLP-E-GH----PM----------A-AFIDA---IP--MPPSTGDLVEGTIIAMNRGRVYIDL-PPFGTGLIYGREYLNA--ADVLRKANPGDTISAKVVDPAGREGYIELSLKEARQAAIWSEAETAILSQTPYSLTVEEANKGGLILSWQGIQGFLPASQLSKEHYPRVPEGDKDKILGELMQLVGHPLSVRIITADAKEGKLIFSERTGEAEE----KASLIDKYQVGDTAEGEVTGVVDFGVFVKL-----------EPGLEGLVHISELDWGLVEDPHAFCSIG…
>CPR_PB4_Kaiserbacteria_GCA_001781555.1
------------------------------MSETGGAG---NIFMIA---------DTSSKTAE----EVE-TGAIDKDLDKNP---TEAE-------------------PLA-K-EG----PM----------S-EFLRA---TA--KAPANDDVVEGPVIAVGRARVFVDL-HPFGTGIIYGREYLSA--RETLKNVNLGDTITAKVVGTENAEGYIELSLREARQALIWNEAETAMQKKSSFELPITDANKGGLIISWNGIQGFLPASQLSPAHYPRVPDGDKEKIFAELKKMVGSKLEVMIITANPKEQKLIFSEKGASTSE----RSSLVEKYHAGDVLMGTVTGATEFGVFVKL-----------EEGLEGLVHISEMDWALVENPKARYKVG…
>CPR_PB4_Kaiserbacteria_GCA_001781465.1
------------------------------MSNK----------FIG--------QDEQRENADAPM-GLA-SAPVDGKKIESG---EDGE-------------------VLI-K-EG----PM----------A-ELFRS---AP--KVPSIDDVVEGPVIAFGRVRVFVDI-HPFGTGIIYGREYLSA--RETLKNVNIGDTITAKVMGTDNPDGYIELSLREARQALIWNDAESAMNKKTIFQLPITDANKGGLIINWNGIHGFLPASQLSHEHYPRVPDGDKDKIFTELKKMVGTKIDVLIITANPKEQKLIFSEKGAGTSE----RTSLVEKYRVGDVFDGIVTGATEFGIFVRL-----------EEGLEGLVHISEMDWALVENPKSRYKVG…
>CPR_PB4_Kaiserbacteria_GCA_001781475.1
---------------------------------------------MA---------------------TAT-KAVETEMPDSDI---KENE-------------------TPA-H-TG----PM----------A-EFLES---TP--KRPANDDVVEGPVIAIGRARVFVDL-HPFGTGIIYGREYLSA--RESLKNTNVGDIITAKVVGIEKKEGYIELSLREARQALIWNEAEVAMQKKTAFELMIADANKGGLIINWQGIQGFLPASQLAPAHYPRVPDGDKDKIFVELKKLIGTKLELLVITANPKEQKLIFSEKGAGSSE----RSTLVEKYHVGDAVEGVVTGATEFGVFVKL-----------EEGLEGLVHISEMDWALVENPKTRYKVG…
>CPR_PB4_Kaiserbacteria_GCA_001004345.1
--------------------------------------------MMA---------------------IET-EGVKRLHDEEEE---GAVV-------------------VAE-K-EG----PM----------A-ELLKS---AP--KPPTTDDVVEGPVIAIGRACVFVDL-HPFGTGIIFGREYLSA--RETLKNVNVGDTVTAKIIGTDNADGYIELSLREARQALIWGEAEMAVQKKSLFELAITDANKGGLIINWNGIQGFLPASQLAPAHYPRVPDGDKEKIFAELKRMVGQKLDVQIITANPKEQKLIFSEKGAGVSE----RTSLVEKYHVGDVVGGIVTGATEFGVFIKL-----------EEGLEGLVHISEMDWALVENPKSRYKVG…
>CPR_PB4_Kaiserbacteria_GCA_001781125.1
----------M---------------------------------------------------------NSE-DEVRKVVGGEED---ETET-------------------TVE-K-EG----PM----------A-DLLQK---SG--TPPVIDDVVEGPVVAVGRARVFIDL-PPYGTGIIYGREYLSA--REALKNVNIGDTVTAKVVGMDNAEGYVELSLREARQAVIWNEAEQALQKKTAFELTVVDANKGGLIINWNGLAGFLPASQLAPAHYPRVPDGDKEKIFAELKKMVGTKLEVMVITASPKEQKLIFSERGAGVTE----RAPLVEKYKVGDVLDGIVTGATEFGVFVKL-----------EEGLEGLVHISEMDWALVENPKTRYKVS…
>CPR_PB4_Kaiserbacteria_GCA_001783485.1
M------LGFLN-------------FDFSMLSPQLNSA------LILLF-QRDGCMKGRSRALYKPM-TVD-TEEKNVPAEDVR---EDEH-------------------ENV-P-AG----PM----------A-ELLRT---AV--KKPAVDDVVEGPVVAIGRARVFIDI-HPFGTGIIYGREYLSA--RETLKNVHIGDIVAAKVVSAENEDGYIELSLREARAALIWNEAETAMTQKTTLALPVAEANKGGLIIHWNGLIGFLPASQLSPVHYPRVPDGDKDKIFAELKKLVGEKLEVMIITANPKEQKLIFSEKGAGTSE----RASLVEKYRVGDVVGGVVTGTTEFGVFVKL-----------EDGLEGLVHISEMDWALVENPKTRYKVG…
>CPR_PB4_Kaiserbacteria_GCA_001004125.1
M-------CSVNTSLPTVP------VHVTMATKTEERG------KIA---------------------NEE-SEIKTEKEEKEN---AQAD-------------------APV-K-TG----PM----------E-DFLRS---IG--KPPELDDVVEGPVTALGRARVFVDL-HPYGTGIIYGREYLSA--RDTLKNVHLGDTITAKIVGTDNTEGYLELSLREARQALIWNEAELAMQKKTIFELPITEANKGGLIINWNSIQGFLPASQLASAHYPRVPDGDKEKIFGELKKLVGEKIEVMVITASPKEGKLIFSEKGAAPSE----RASLVEKYHVGDVMDGVVTGATDFGVFVKI-----------EEGLEGLVHISEMDWALVENPKGRYKVG…
>CPR_PB4_Kaiserbacteria_GCA_001781115.1
---------MVRAQ--------------EIMSATAVEE------VVD---------------------------SDDNEMEEKG---LPSE-------------------ALA-K-EG----PM----------A-ELLDS---VP--KPPAIDDVVEGPVIAIGRARVFVDL-HPFGTGIIYGREYLSA--RETLKNVNIGDTITAKVVGMDNEEGYLELSLREARQALIWGEAEAAFQKKTAFELPVAEANKGGLIIQWNGLQGFLPASQLSPAHYPRVPDGDKEKIFAELKKLVGTKLEVMIITASPKENKLIFAEKGAGQSE----RSSLVEKYHVGDVIEGVATGATEFGVFVKL-----------EEGLEGLVHISEMDWALVENPKTRYKVG…
>CPR_PB4_Kaiserbacteria_GCA_001781355.1
---------MVRAR--------------KHMSETAADE------VVT---------DENGEM------EER-EGLPSGLPDEAS---AESG-------------------VLA-K-EG----PM----------A-EIIGA---AP--KRPMLDDVVEGPVVAVGRARVFVDL-HPFGTGIIYGREYLSA--RETLKNVNIGDTIAAKVVGEDNEEGYIELSLREARQALIWNEAEVAAQKKTAFELPVAEANKGGLIIEWNGLPGFLPASQLAPAHYPRVPDGDKDKIFAELKKLVGTRLEVVIITANPKEQKLIFSEKGTGSPE----RASLVEKYHVGDTVEGIVTGATEFGVFVKL-----------EEGLEGLVHISEMDWALVENPKTRYKPG…
>CPR_PB4_Adlerbacteria_GCA_001775485.1
------------------------------------------------------------------------MMSAKKAALIAA---QVED-------------------TLR-E-PT----LM----------E-GLASR---AQ--EPPKPGDIVEGPVIALDRARLYIDI-APWGTGVIFGREYLNA--REVIKRTNVGDRIAAKVLEINTKDGYIELSLKEARQAILWAEAEEAVKNKTQFDLVVKEANKGGLILEWQGIAGFLPASQLKPEHYPRVLDGDKDKILDELRKLVGEKLAVSLIGAAPKEGKLIFSEKGVDDKE----KKELIASYQVGDVVSGEITGMVDFGVFVKL-----------EEGLEGLVHISEIDWGLVDDPRHFFKVG…
>CPR_PB4_Adlerbacteria_GCA_001773575.1
----------MN---------------------------------------------------------------------------EVEE-------------------GSI-P-TS----VM----------A-MFAEQ---AQ--MPPKEGDIIEGTVLALDRAKLYIDL-PPFGTGVIFGREYMNA--REVIKRINVGDIIAAKVIATDSKDGYIELSLKEARQAIIWAEAEDAVRNKTQFDLVIKEANKGGLILEWQGIAGFLPASQLKAEHYPRVADGNKDEILNELRKLVGQKLPVSLISAIPKEGKLIFSEKGADDKE----KKEIVERYVVGDVIEGEVTGMVDFGVFVKL-----------EEGLEGLVHISEIDWGLVDDPRHFFKVG…
>CPR_PB4_Adlerbacteria_GCA_001775435.1
----------MN------------------------------------------GAEVNPAGI-----SV-QPNMQTAELEKEE---SLNV-------------------ADV-P-ES----VM----------Q-ALAAQ---AQ--EPPKEGDIVEGKVLALDRAKLYIDL-PPWGTGVIYGREYLNA--REVIKRTNIGDVVAAKVIGTD-KEGYIELSLKEARQALLWAEAEEAVKTKAQFELAVKEANKGGLILEWQGLQGFLPASQLKPEHYPRIPDGDKDKILEELRKLVGEKFVVTMIGATPKEGKLIFSEKGQDDKE----KRELIANYSVGDTVEGEVTGMVDFGVFVKL-----------EEGLEGLVHISEIDWGLVDDPRHFFKVG…
>CPR_PB4_Zambryskibacteria_GCA_001823895.1
---------MTK-------------HGAFFMAEI-------------------------------------TKPKTTAEDVNAS---EEEI-------------------KSK-K-ES----YM----------T-RRFAE---AA--NPPAIEDLIEGKVISIEPGAVYIDL-VPFGTGIIYGREYLNA--RDIIKKINIGDSVAGKVVGIDDKDGYIEISLKEARQALIWGEAEEAIREKRIYDLVIQDANKGGLIMTWQGIQGFLPASQLKPEHYPRISDGDKDKILEELQKLVNEKISVSIIAAIPKEGKLIFSEKSPESKD----KTEIISKYNLGDEITGEVTGIVDFGVFVKL-----------EEGLEGLVHISEMDWALVENPRAMYKIG…
>CPR_PB4_Zambryskibacteria_GCA_001823875.1
------------------------------MAPI------------------AFHWRCSDSAKWKK-----NNMSTKTQVADSS---VEEK-------------------VAK-K-EG----PM----------S-KFMAE---TV--TPPSLEDLIEGKVIAIDKAVVYIDL-PPFGTGIIYGREYINA--RDIIKKVNVGDTVAGKVIAIDNKEGYIEISLKEARQALIWSEAEDAIRDKKLFDLTVTDANKGGLILSWQGLQGFLPASQLKPEHYPRVSDGDKDRILDELRKLVGEKLSVLIIAAIPKEGKLIFSEKGEEETK----KGEITGKYALGDELSGEITGIVDFGVFVKI-----------EEGLEGLVHISEMDWGLVENPRSMYKVS…
>CPR_PB4_Zambryskibacteria_GCA_001825295.1
----------------------------MSMSKQ--------------------------------------TINKEEVKPTRN---ASQG-------------------DAG-V-EN----RM----------S-KFLDN---SV--LPPEKDSIVDGVVISIAKNSIFVDL-PPWGTGIIFGREHINA--RDLIKKINIGDKITGKIVGRDNKEGYIEISLKEAKQALIWSDAEEAIRDKKVFEIPIKEANKGGLMLVWQGITGFLPASQLKTEHYPRISDGDKDKILEELRKLVGQKISVAIIAVNAKEGKLIFSEKDPDSGE----KEKIIDKYNLGDELEGEVTGIVDFGIFVKI-----------EEGLEGLVHISEIDWGLVDDPRKFAKVG…
>CPR_PB4_Zambryskibacteria_GCA_001824095.1
------------------------------MTKK-----------------------IDEEV----------LVDDTASYEAVQ---DEPE-------------------KAL-E-ES----RM----------D-KVLSE---SK--NPPSVDDVIEGTVLAIEKAKVFIDI-PPFGTGIIYGREYINA--RDIIKKINIGDTVAGKVISLDNKDGYIEISLKEARQALIWSEAEAAIAEKKIFELSIQEANKGGLMLSWQGITGFLPASQLKTEHYPRVTDGDKDRILEELKKLVGQKISVAIIGASPKEGKLIFSEKNPEQKN----KEYIIDKYVLGDTVMGEVTGMVDFGVFIKL-----------EEGLEGLVHISEIDWALVENPKLMFHIG…
>CPR_PB4_Zambryskibacteria_GCA_001004055.1
-----------------ML-----------VG-RPAR--LPRRRGLQ--------------------KNSI-FYKL--------------------------------------Q-TT----DP----------P-RQLKSKFELI--KPFRVGDLVEGRVLGIGRSAVYLDL-GPQGTGIIYGREFLEE--RAALRNVKPGTTIVAKIVDLENEDGYIELSLKEAGKELTWDRLKEMKEKEEVFPVKIIGANKGGLLADLHGTQAFLPVSQLAQEHYPRVEDGDPSKILRALQAFVGQELELQVFDLNPQDGKVILSERSGERTR----LKEQLARFAVGDVVEGEITGVVDFGAFIKFPADLP-TGGPDEERVEGLIHISEIDWQIIEDPAQILKVG…
>CPR_PB4_Zambryskibacteria_GCA_001825155.1
---------MLS-----------------TLEEV--------------------GVPTQPEA------GVK-EIKKVKRVKKTK---EAPE-------------------ANQ-A-NE----AI----------S-SYLEK---IP--TPPAIDDLVEGSVISIDKGAVYVDL-PPFGTGIIYGREFQNA--RDIIKKINVGDIVAGKVVGVGGKEGYIEISLKEARQAIIWNEAEDAIREKRTFELPITDANKGGLIINWQGITGFLPASQLKPEHYPRISDGDKDKILDELKKLVGEKLSVTIIGVNPKEGKLIFSEKSPETKD----KENIVSRYALGDELTGEVTGLVDFGVFVKI-----------EEGLEGLVHISEIDWGLVENPKTMFKIG…
>CPR_PB4_Zambryskibacteria_GCA_001823735.1
M------FNFVKLPWFFIS------DKVEVGAEQ---------------------ARSAAAQ------RVSVERSAEKTQAVPR---KTIR-------------------AAQ-T-NN----ES----------Q-EFLEK---IP--NPPQVDDLVEGPVISIDKGAVYVDL-PPFGTGIIYGREFMNA--RDIIRKINVGDIVAGKVVGIGGKEGYIEISLKEARQAIIWNEAEEAIREKRVLELPITDANKGGLIINWQGITGFLPASQLKPEHYPRISDGDKDKILDELRKLVGEKLSVQIIGVNPKEGKLIFSEKSPETKD----KEDIVSRYVLGDELTGEVTGLVDFGIFVKI-----------EDGLEGLVHISEIDWGLVENPKAMFKIG…
>CPR_PB4_Taylorbacteria_GCA_001822575.1
---------MFKK---------TEEELKAYLGEE-------------------------------------EKKKTIHSSEKKT---DVKV-------------------IAE-K-TG----AM----------A-PFLNI---MK--DPPQIGDLVEGPVIAVEKSSVFIDL-PPFGTGIIYGREFIVA--RDVIKKINIGDMVAAKIVDNAHKEGYYELSLKEARQALIWSEAETAIKEKKTLDLLVKEANKGGLLVEWQGIVGFLPASQLKAEHYPRVTDGDKDKILEELKKLVGTRLSVSIIAADPKEGKLIFSEKGSEHKE----KEKIVSKYEIGDEVEGVVTGVVDFGVFVKL-----------EEGLEGLVHISEIDWGLVDDPRNFLKVG…
>CPR_PB4_Taylorbacteria_GCA_001822795.1
----------MK--------------------------------------------------------FMA-KKVKVVDETTTE---EKAI-------------------KVK-K-DS----LM----------T-KIVEK---SI--TPPSFGDVVEGEVIGIEKSCVYIDL-PPYGTGIIFGKEFINA--RDIIKKINIGDKVSAKVVDTGNKDGYIELSLKEARQALIWDEAEEAIKNKTILELPVTEANKGGLIITWQGIKGFLPASQLKTEHYPRINDGDKDKILDELKKLVGQKISVAIITALPKEGKLIFSEKNIEKKG----KQKMVAKYKVGDVCSGEITGIVDFGIFLKI-----------EDGLEGLVHISEIDWTLVENPRAFYKMG…
>CPR_PB4_Taylorbacteria_GCA_000996205.1
---------ML------------------NILDI-------------------------------------LEKSEESAAAATE---EKNS-------------------KPK-K-EN----LM----------V-SIFNK---VD--NLPSVGDLVEGHVIGIEKSRLYVNL-QPYGTGIIYGREFIGA--RDIIKKINPGDIIAAKVVEVENDDGYIELSLKEARQAMIWSEAEEAIKNKTVLDLLVNEANKGGLILNWQGVAGFLPASQLKAEHYPRVADGDKDRILDELKKLVGQRISVVIIGATPKEGKLIFSEKSPEFKD----KEKIIEKYKIGDDVMGEVTGIVDFGVFIKI-----------EEGLEGLVHISEINWSLVEDPRSLFKVG…
>CPR_PB4_Taylorbacteria_GCA_001822655.1
M--------IMK----------VATKDISTITEQLPIS-----------------------------SKLIPAVVEKPKKIKTK---NKEL-------------------SGD-E-AH----PL----------H-QMFQG---SP--VPPSLGDIVEGKVITIDKSGVYIDL-SPIGTGIIYGREYQNA--KDVIKKMNQGDIIAAKVVDTNHPQGYFELSLKEARQALIWSEAEDAIKQKKVLELPVTEANKGGLIIEWQGIQGFLPASQLKTEHYPRVEDGDKDRILEELKKLIGQKISVSIISASPKEGKLIFSEKNPVEKD----KEKIIEKYVVGGILEGEVTGIVDFGIFVKL-----------EEGLEGLVHISELDWALVENPKTLFKVK…
>CPR_PB4_Taylorbacteria_GCA_001821295.1
----------MNTGQWI-N-KIESTEKDENATEKPPEE-----------EVKEIQVNTNAE--------VT-KTKKESGRSAKK---TLPP-------------------AVK-N-EG----LM----------S-KVVND---SA--TPPDVGDIMEGRVISNDKTGVFVDL-SPLGTGVIYGREYINA--RDVIKKINSGDIIAAKVVDVENKDGYIELSLKEARQALVWSEVENIIRDKQVLELPVKEANKGGLIIEWQGISGFLPASQLKADHYPRVTDGDKDKILEELRKLVGQRISVSIISASPKEGKLIFSEKNPQEKD----KDKIIEKYDIGDEFEGEVTGVVDFGVFVKI-----------EEGLEGLVHISEIDWALVEDTKQLYKVR…
>CPR_PB4_Taylorbacteria_GCA_001820875.1
M--------QLS-----------------HMKKD------------------------------------T-AVVVEGATANGT---DEPL-------------------VYR-P-ET----LM----------E-KMGAT---IT--TPPSVGDVIEGKVLGSARAAVYVDL-PPFGTGIIYGREYINA--RDLIKKINVGDIIAAKIISNENVDGYIELSLKEARTALVWSEAEQAIKEKSVLELLVKEANRGGLILEWQGLQGFLPASQLKPEHYPRVSDGNKDRILEELKKLVGTRISVSIITALPQEGKLIFSEKSQSEKE----KEKIIEKYAVGDEVEGTVTGAVDFGIFVKL-----------EEGLEGLVHISEIDWALVEDPRTRFKVA…
>CPR_PB4_Taylorbacteria_GCA_001821015.1
M---RADYHFFS-------------SAPETLEKK----------------------------------TLA-ETLGLVSEQTDA---EREE-------------------HFR-K-NT----IM----------G-RMMGS---VS--TPPSLGEVIEGKVLGIARAAVFVDL-PPFGTGIIYGREYINA--RDIIKKINPGDIIAAKIVGNENEEGYIELSLKEARKAIVWSEAEQAIKEKRVIELVVKEANKGGLILEWQGLQGFLPASQLKAEHYPRISDGNKDRILDELKKLIGQHLSVSIITALPQEGKLIFSEKSQNEKE----KEHMIEKYAVGDELEGTVTGAVDFGIFVKL-----------EEGLEGLVHISEIDWALVDDPRTRFKVG…
>CPR_PB4_Taylorbacteria_GCA_001820985.1
---------MLK--------EAMATKIDEVIVEE-------------------------------------NLNKEKEEDIKTE---KGDA-------------------IIK-K-ES----IM----------T-ELLNK---SA--TPPEVGDLVEGPVIAIEKSSVYVNL-PPYGTGIIYGREYLNA--RDIIKRVQIGDTIAAKVVDTGNENGYIELSLKEARQALIWSEAEVAIKDRKVFDLPVKEANKGGLIIEWQGIPGFLPASQLKSEHYPRVQDGDKDKILEELRKLVGEKLSVSIIGAIPKEGKLIFSEKNSEEKE----KEKIIEQYKVGDEIGGTVTGIVDFGVFVKI-----------EEGLEGLVHISEIDWALVEDPRKLFKVG…
>CPR_PB4_Taylorbacteria_GCA_001000545.1
M---YASQKQMT-------------KKNNKVGEN-------------------------------------SIDIGKEENLEKN---ESGL-------------------APK-K-DG----LM----------T-KLIGS---SA--NPPQAGDLVEGQVSAVEKAAVYVDL-PPFGAGIIYGREYQNA--RDLVKKIQIGDKITAKVVDAGNENGYIELSLREARQALVWNEAEVAIKEQKVFELPIKDANKGGLIIEWQGIVGFLPASQLKSEHYPRVEGGDKDKILDELKKLVGTRMSVAIITALPKEGKLIFSEKTSEEKE----KGKMVEKYSVGDELAGVVTGIVDFGVFIKL-----------EDNLEGLVHISEIDWGLVEDPRKMCKVG…
>CPR_PB4_Taylorbacteria_GCA_001822695.1
----------MR-----------------------------------------------------------SEPSAIRFMNTEV---LVKE-------------------TPM-D-IG----VM----------N-FVLSQ---TR--NQSVEGDLVEGTVLGVERAVVYIDL-SPLGTGIIYGREFNNA--RDLIKKMNPGDTVSAKIVGTNHKDGYIELSLKEARQALIWDEAEKAIKEKKVFELVAKEANKGGVILEWQGLQGFLPASQLKTEHYPRVDDGDKNKILEELRKLTGTKLVVSIIAAAPKENKLIFSEKTLEQEG----KEKIIEKYAVGEVTEGTVTGAVDFGIFVKL-----------EDGLEGLVHISEMDWALVDNPRSRFKTG…
>CPR_PB4_Taylorbacteria_GCA_001003165.1
-------------------------NAATTLKEA---------------------------------------ADLVDSPPKDV---ATED-------------------KEK-K-ET----LM----------G-KILKD---TA--SPPAVGDIVEGTVVNIEKSKVYVDL-PPFGTGIIYGREYINA--RDVIKKVSIGDKIAAKVVNVENEDGYIELSLKEARQAMIWSEADAAIRDKKIVDLTVKEANKGGLILEWQGIAGFLPASQLKTEHYPRVADGDKDKILEELRKLVGQKISVCVISAIPKEGKLIFSEKNPEAKD----KEKIVGKYNVSDEVEGSVTGIVDFGVFVKL-----------EEGLEGLVHISEIDWALVEDPRTHFKVG…
>CPR_PB4_Taylorbacteria_GCA_001820955.1
---------MISR---------PANGSCEITFQK----------------------------------ILM-DTNVMEADVNAD---VSLR-------------------DPK-K-DS----PM----------T-SLIGQ---IK--GIPNGGDIVEGTVISVAKGKVFVDL-KPFGTGIIYGREYIVA--RDIIKKVNPGDKISAKIVDPENENGYIELSLKEARQAMVWSEAEEIMKEKRAIELIPTEANKGGLIVEWQGVQGFLPASQLKAEHYPRVPDGDKDKIYDELKKLVGTKITLSIISVSPKENKLIFSEKAFEEKD----KEKLVSKYAVGDAVEGEVTGIVDFGLFLKV-----------EEGLEGLVHISEMDWGLVENPRLMFKVG…
>CPR_PB4_Taylorbacteria_GCA_001001935.1
M---RGEKALIS-------------LPFNFVTE---------------------------------------VKTVTLSSHKTK---EKKE-------------------ISK-E-LT----PS----------A-KTLAG---VK--NPPKVGDLAEGTVIANARGRIYIDL-PPFGTGVIYGREYLAA--REILKKVLIGDSVTAKVIETDSKHGYIELSLKEARQAMLWSDAEAASREHKSFDIAVGEANKGGLIMEWQGIQGFLPASQLGANHYPRIEDGDKDKILEELKKLVGQKLTVAIISVLPKEGKLIFSEKALTEKD----RAQMVGKYTIGDDMDGTVTGAVDFGVFVKI-----------EDGLEGLVHISEMDWALVENPRLRYKTG…
>CPR_PB4_Taylorbacteria_GCA_001820935.1
--------------------------HLITGMED-----------------------TNT-------------GVALTSDELEA---AAEA-------------------AKQ-N-EK----LM----------S-KLMGA---VH--TPPSVGDLVDGSVIAVSKGKVFVDL-HPFGTGIIYGREYINA--RDVIKKINVGDTIAAKIVDFDNPDGYIELSLKEARQALIWNEAESAIRDKKVFELAVKEANKGGLILEWQGIAGFLPASQLKADHYPRVPDGDKDKIFEELRKLVGEKLQVTIISTIPKEGKLIFSEKSTTEKE----REKIIGKYNVADELEGEVTGLVDFGAFVKL-----------EDGLEGLVHISEIDWALVEDPRKLYKVA…
>CPR_PB4_Taylorbacteria_GCA_000999035.1
----------MKNLFFYGH-------HILYMTED-----------------------TNPLV----------GGTLMTSDEAKA---LGEV-------------------SQV-N-EK----LM----------T-RLIAA---SK--NPPSVGDLVDGKVILSSRGRVFVDL-PPFGTGIIYGREYINA--RDIIKKINPGDTIAAKIVDFENPDGYIELSLKEARQALIWNEAETAIREKKVFELPVKEANKGGLILEWQGIAGFLPASQLKAEHYPRVPDGDKDKIFEELRKLIGEKLFVAIISVIPKEGKLIFSEKSTTEKE----REKIIGKYNVGDELPGEVTGLVDFGVFVKI-----------EDTLEGLVHISEIDWALVEDPRKLYKVG…
>non-CPR_non-CPR_Cyanobacteria_NC_019729
----------MVNL-K-TT--------------------------------------------------------------------------------------------KDI---GF---TH----------E-DFAALLDKY---YHFSPGDVVAGTVFSIEPRGALIDI-GAKTAAYIPIQEMSINRVESPEEVLQSNETREFFILTDENEDGQLTLSIRRIEYMRAWERVRQLQAEDATVRSQVFATNRGGALVRIEGLRGFIPGSHISTRK--------------PKEELVAEELPLKFLEVDEDRNRLVLSHRRA-------LVERKMNRLEVGEVVIGTVRGIKPYGAFIDI------------GGVSGLLHISEISHDHIDTPHSVFNVN…
>non-CPR_non-CPR_Cyanobacteria_NC_019729_2
----------MNSKSTGSQ--------------------------------------------------------------------------------------------AKA---SF---SM----------D-DFAKALEQH---YEFQKGQVVRGKVFEYDSNGAYVDI-GGKSSAFLPIEEAALRTVTDLSEVVPLDEERDFLIIREQDADGQVTLSLRQLQIQQAWEDLIELQETGKVLQVRVSGANKGGVTVDVQGMRGFIPRSHLVDRD--------------NLESLIGQSLSVNFLEVDREREKLVLSQRMA-------TQSNAFKDLQIGQLVEGKVSSIKPFGVFVDL------------EGVSGLLHIKQVSQKYIDNLGKLFAPG…
>non-CPR_non-CPR_Cyanobacteria_NC_008312
----------MNSESISSQ--------------------------------------------------------------------------------------------SKQ---SF---TM----------D-DFAKALEQY---YEFKKGQIVTGKVNSYESEGIYVDV-GGKSLALLPFPEASLGDIEDLSEALPLQQEREFLIIREQDADGEVLLSIKQLEINQIWERLAELEAGGQSFQVRVIGTNKGGVTVDIQSLRGFVPRSHLLARD--------------NLESLIDQVLTVNFLELDQEKKKIVMSQRLA-------TQSAGFSKLAVGQLLEGKVVGVKPFGVFVDL------------EGLTGLLHITQVSQKRVDSLSTIFSQG…
>non-CPR_non-CPR_Cyanobacteria_NC_019693
-WGF------LRGQKVDNY----------------------EILGVGGE-------------RANKIIRDQ---ILTKKYAVKLRYTDTENFDRGFQELDAATRLSHALDVGEW---TI---NN----------D-QFASALKIV---RDLKPGNVMRGIAKETNSQGVRLTM-GTRDPALIPVTKPAPIPVTKPAP-IPVTKSAPVQTPVPVQTPAAVLAAVPPQKLFKPWKILQEKYDKNEIIEVQIISVNKGGILVKVLNISGFIPKSHLVQPH-------------PKYHDLVGQSLDVLILEIEKVNNKLTFSETML-----------KSSSLQVGQLVEGKITRIENHGVFLEF------------NGLKGFLYIGEISSDYVNSIDNIFKID…
>non-CPR_non-CPR_Cyanobacteria_NC_019693_2
----------MNSNSSRSQ--------------------------------------------------------------------------------------------AQP---SF---SA----------E-DFAKALEQQ---YDFRKGQKVRGKAFEYVSEGAYIDI-GGKSAAFLPLAEASVKPVSNLAEIVPIDEERDFLIVSEPNDEGQVKVSIRQMELRKVWEHLAQVQENNESVPVRVIGVNKGGVTVNVEGLRGFIPRSHLSERG--------------NLEQLIGQNLSATILEADRDRNKLVLSQRLQ-------ARAKRMGQLVVGQLVEGEVVGLKPFGVFVDL------------NGVTGLLHINQISQKYVASLQTVFQVG…
>non-CPR_non-CPR_Cyanobacteria_NC_019753
----------MTSKSTASQ--------------------------------------------------------------------------------------------ANQ---SF---TM----------D-DFAKALEQH---YSFQQGQVVRGKVHSYDTDGVYVDI-GGKSLAVVPIQEIAANDITDVSTVLPLQEEQEFLIIREQDADGQVTLSRRQLQIKHAWDSIAEMQDNKQSVQVRVSGVNKGGVTVDFQGVRGFIPRSHLIDRE--------------NLPELVGQNLTTSFLEVNPETKKLVFSQREA-------NRAASFSQLEVGQLVEGKVSSLKPFGIFVET------------EGTTGLIHIKQVSQKYIESLPSLFEIG…
>non-CPR_non-CPR_Cyanobacteria_NC_019771
----------MNSESQLSQ--------------------------------------------------------------------------------------------ANS---SF---SM----------D-DFAQALEKH---YQFQKGQVVHGKVFQLDHDGAYVDI-GGKSSAFLPRDEASLRAVTDLAEVLPMQEDMEFLIIRDQDAEGQVTLSRKQLEIQQIWVKLLQMQENSQTVQVRVTGVNKGGVTVDLLSLRGFIPRSHLADRD--------------NLETLKGQTLTAGFLEINRNTNKLILSQRLA-------TRSSSFSLLELGQLVEGKITGIKPFGVFVEL------------NGVSALLHIKQVSQKFIESLEKVFQIG…
>non-CPR_non-CPR_Cyanobacteria_NC_019751
----------MDSDAKLSQ--------------------------------------------------------------------------------------------ADS---SF---TM----------D-DFAKALEQH---YQFQKGQTVHGKVFQIDHDGAYVDI-GGKASAFLPRDEASLRTVTDLSEILPLQEKLEFIIIREQDAEGQVTLSRRQLEIRHIWEKLIQMQEASQTVQAKVTGVNKGGVNVEVFGLRGFIPRSHLSERD--------------NLESLKGQTLTTSFLEIDPNTKRMVLSQRLA-------SRSANFSMLEIGQLVEGKVTGIKAFGVFVEL------------DGVSALLHIKQVTQKYIDNLEKVFQVG…
>non-CPR_non-CPR_Cyanobacteria_NC_009925
-----------------------------------------------------------------------------------------------------------------M---SF---SA----------D-DFAKALSQH---YSFEVGQTVQGKTVNYDSDGAYIDI-GGKATAFLPSQEASLRKQFSLEEIVPLDEEREFLIIKGQDANGQVTLSIRRLELKHLWTKLLELQSQSQSVQVTITGVNKGGVTADVEGLRGFIPRSHLLDRD--------------NLEGQIGSQLTVTFLEVDPDRKKLVLSNRMA-------EQSSRIGELEIGQLVSGTVSDLKPFGAFIKL------------DGLTGLLHIKEVSQNFVPNLSAVLKIG…
>non-CPR_non-CPR_Cyanobacteria_NZ_CP017599
----------MNSKSTSST--------------------------------------------------------------------------------------------SNS---SF---SM----------D-DFAQALEEY---YEFKQGQVVRGRVNNYESDGAYVDI-GGKSLAYLPIREVSLELDQDWSEVLPLDEEMDFLIIREQNADGQVTLSRRQLEIKQVWDGLVELQDNGKSLDVRVSGVNKGGVTVDVRGLRGFIPRSHLSQHD--------------NLDSLIGQKLTVTFLEADRDRNKLVLSQREA-------VRAATFSELEVGQLVEGKVAAIKPFGVFVDF------------NQTNGLLHIKQVSQSFVEDLSKVFEIG…
>non-CPR_non-CPR_Cyanobacteria_NC_010296
---------------------------------------------------------------------------------------------------------------------------M----------D-DFAKALDQY---YQFEKGQIVRGRVDQHTSDGAFIDI-GGKSSAFISLREISLENVTSIAEALPIDAEFDFLITRGQDAEGQVTLSLRQLLLQKAWENVREISESGKSVQLRVTGVNKGGVTGEVEGLKGFIPRSHLIEKN--------------DLDSLIGQLLTATFIQIDQENNKLVLSQREI-------ARANAISQLAVGKLLSGTVVKLQPYGVFVDC------------GGVTGLLHAKQVTGASFNSPMTFFKVG…
>non-CPR_non-CPR_Cyanobacteria_NC_019748
----------M----SDSI--------------------------------------------------------------------------------------------TKQ---SF---SM----------D-DFAKALEQY---YEFSKGKVIKGTVVQYESEGAYVDI-GGKSPAFVPTREAALGTIDNLAEVLPLNQELEFLIIREQNDEGQVTLSRRQLQLQAAWDNVAEIAESGKSVQVRITGVNKGGVTGEIEGLRGFIPRSHLEQRD--------------NLDSLVGQLLTATFLEVNPDDKKLVLSQRGA-------IQAKAMAKVEQGTLVEGKIVSLKPYGVFVDL------------DGATGLLHIKEVSNTHINSLTTIFKIG…
>non-CPR_non-CPR_Cyanobacteria_NZ_AP012549
----------MVTQ-KTTA--------------------------------------------------------------------------------------------QDI---GF---TH----------E-DFAALLDKY---YHFNPGDIVPGTVFSMEPRGALIDI-GAKTAAYIPIQEMSINRVDDPEDVLQSNETREFFILTDENEDGQLTLSIRRIEYMRAWERVRQLQAEDATVRSNVFATNRGGALVRIEGLRGFIPGSHISTRE--------------AKEDLVGEDLPLKFLEVDEERNRLVLSHRRA-------LVERKMNGLEVGQVVVGSVRGIKPYGAFIDI------------GGVSGLLHISEISHDHIDTPHSVFGVN…
>non-CPR_non-CPR_Cyanobacteria_NZ_AP012549_2
----------MTPESIPSK--------------------------------------------------------------------------------------------SKI---SF---SI----------D-DFAKALEQH---YTFEKGQIVSGSVLQHTSDGAYIDI-GGKSTGFVSFKEAALDSTSDLVEVLPLNEECQFLIISDQNAEGQVKLSARQLQLQQAWDYVAELVKTGQTVQMLVTQTNKGGVIGKVEGLRGFIPRSHLLEKE--------------DLESLVGKSLTANFLEVNQENNKLVLSQRRA-------IMAEQINKITVGTLVAGKVARIQPYGIFVDL------------NGVTGLLHITQISGLRVDSLNTLFKFG…
>non-CPR_non-CPR_Cyanobacteria_NC_019689
----------MIAKSNSSQ--------------------------------------------------------------------------------------------PGL---SF---SL----------D-DFAKALDQH---YQFAKGQIVRGTVFEHTSEGAYVDI-GGKSPGFVPLREASVKSGVSLAESLPLREEKDFLIVSGQNAEGQVTLSRRQLELKKAWDSVSEIAESGKSVQMRVTGVNKGGVTGEVEGLRGFIPRSHLIEKE--------------DLESLVGQLLTATFLEVDPDNKKLVLSQRQA-------ARAAAIRKLETGALMEGKVVKIQPYGVFVDL------------DGVTGLLHIKQVSGSPIDSLTTLFKIG…
>non-CPR_non-CPR_Cyanobacteria_NC_019695
----------MKSDSTPS---------------------------------------------------------------------------------------------SSS---SF---SM----------E-DFAKALEQH---YQFQKGQTVRGKVFQYDSNGAYVDI-GGKSAAFLPADQASLQQVTDLSTVLPLQEELEFLIIRDQDADGQVTLSRRQLEIQHIWERIEQMQENRQTVQVRVTGANKGGVTVDVLGLRGFIPRSHLVEKE--------------NMESLKGQNLTASFLEVDYDNKKLVLSNRLA-------TRASSFSQLEIGQLATGKVSSIQPFGVFVDL------------NGVSGLLHIKQVSQNYTASLPALFKIG…
>non-CPR_non-CPR_Cyanobacteria_NC_019780
----------MVSQ-NVTS--------------------------------------------------------------------------------------------RDI---GF---TH----------E-DFAALLDEY---YHFNPGDIVPGIVFSVEPRGALIDI-GAKTAAYIPIQEMSINRVEEPGEVLQPEETREFFILTDENEDGQLTLSIRRIEYMRAWERVRQLQAEDATVRSGVFATNRGGALVRIEGLRGFIPGSHISTRQ--------------PKEDLVAQDLPLKFLEVDEERNRLVLSHRRA-------LVERKMSGLKVGEVVIGSVRGIKPYGAFIDI------------GGVSGLLHISEISHDHIDTPSSVFDIN…
>non-CPR_non-CPR_Cyanobacteria_NC_019780_2
----------MTSDFTPSS-------------------------------------------------------------------------------------------QANV---PF---SQ----------D-DFEKALPEY---YHFQKGQIVRGKAINYDSNYAYVDI-GGKSPGLLPFAEANLGSIASFEEAIPLDEEIELLVIREQDADGQVTLSRKQLQEQRVWETLEEYQADKKPVEIVVTGSNRGGVKGEIMGLRAFVPRSHILASD--------------NLDDLIGQTVTGILIEVNPEDKRLVLSQREA-------AKADAMGQIIAGSLIEGKIVNLKPYGAFVEL-----------AAGVTGLLHIKQISQKRVDSLESLFSVG…
>non-CPR_non-CPR_Cyanobacteria_NZ_AP014642
----------MTNQ-N-TL--------------------------------------------------------------------------------------------MDV---GF---TH----------E-DFAALLDKY---YHFSPGDVVAGTVFSLEPRGALIDI-GAKTAAYIPIQEMSINRIDAPEEVLQSNETREFFILADENEDGQLTLSIRRIEYMRAWERVRQLQAEDATVRSLVFATNRGGALVRIEGLRGFIPGSHISTRK--------------PKEDLVGEELPLKFLEVDEERNRLVLSHRRA-------LVERKMNRLEVGEVVIGTVRGIKPYGAFIDI------------GGVSGLLHISEISHDHIDTPHSVFNVN…
>non-CPR_non-CPR_Cyanobacteria_NZ_AP014642_2
----------M-----PSR--------------------------------------------------------------------------------------------TDA---SF---SM----------E-DFAKALEQH---YEFQKGKLVTGKAFSYESDGALVDI-GGKSPAFLPIEEASVRRVNDVSAVLPLDEEREFIIVREQDADGRVTISLRQLEVRKVWERLADLQANNQSVQVRVTGMNKGGVTVDVQGLRGFIPRSHLVERE--------------NLEALKGQTLSATFLELDRDRNKIVLSNRLA-------ARTVNFSQLEVGQVVTATITSLKPFGAFAEF------------DSTTGLLHINQISKNYVESLSSLLKVG…
>non-CPR_non-CPR_Cyanobacteria_NC_019776
----------MTANSHSSA--------------------------------------------------------------------------------------------NNL---SF---SM----------D-DFSQALEQY---YHFKQGDVVRGKVFEYSSDGVYVDI-GGKSPGFVPQTEVDWRGSSNVKEVLPLEQEFDFVIIKEQDAEGQVKLSRRQLFIDQAWDNLKEIEEKGAIVQMLVTGVNRGGVFGEVQGLKGFIPKSHLTQKE--------------DLETLIDQTVDTNILQLDQKENKLVLTQRNI-------ARSSALSQLKENEVVAGKIAKIQPYGVFVDF------------GGVSGLLHIKQISEGKVNALESFFQIG…
>non-CPR_non-CPR_Cyanobacteria_NC_019776_2
----------MVNQ-TETL--------------------------------------------------------------------------------------------SNV---SF---TH----------E-EFAALLDQY---YHFSPGDVVPGTVFSIEPKGALIDI-GAKTAAYIPVQELSINRVDDPSEVLQANETREFFILTDENEDGQLTLSIRRIEYMRAWQRVRQLQEEDATVYSNVFATNRGGALVRVEGLRGFIPGSHISAKD--------------TKEDLVGQDLPLKFLEVDEERNRLVLSHRRA-------LVERKMNGLEVGQVVIGSVRGIKPYGAFIDI------------GGVSGLLHISEISHDHIDTPHSVFNVN…
>non-CPR_non-CPR_Cyanobacteria_NZ_CP021983
----------M----------------------------------------------------------------------------------------------------------TF---SA----------E-DFAKALEQH---YHFQTGSVVQGMVIAMDSDGAYVDI-GGKAAAFLPLREASLKRLSHLEDVLTAGDSYDFLVIRDQDADGQVLLSLRQLQLQALWEKLATWQADNATLEVKVTGTNKGGVLADVEGLRAFIPRSHLLAAD--------------DLEALVGQTLRVSLLEVSPERNKLVLSQRQA-------ARSQAMATLEIGQLVEGTITGLKPFGAFVEF------------DGVTGLLHINQISKSYVDSIAHLFQIG…
>non-CPR_non-CPR_Cyanobacteria_NC_005125
--------MELGTP-A-PT--------------------------------------------------------------------------------------------TDI---GF---TR----------E-DFERLLSQY---YRFNPGDIVKGTVFSLEPRGALIDI-GAKTAAYLPLQEMSINRVDDPTEVLGEGDTLDFFILSDENEEGQLTLSIRRIEYMKAWERVRKLQTEDQTVRAKIFAVNRGGALVRIEGLRGFIPGSHLSTRE--------------PKEELIGEELPLKFLEVDEERNRLVLSHRRA-------LVERRMNKLEAGQVVIGRVRGIKPYGAFIDI------------GGVSGLLHISEISHDHIETPHSVFNVG…
>non-CPR_non-CPR_Cyanobacteria_NC_006576
----------------MSP--------------------------------------------------------------------------------------------AAN---TP---SY----------D-DFALALEAQ---LDSQKGQLVRGKVCEYSTDGAYIDI-GGKAPAFLPKREAALHAVLDLEAHLPKDEELEFLVIRDQNEDGQVTVSLRALALEQAWTRVAELQEGGQTVQVKVTGSNKGGVTADLEGLRAFIPRSHLNEKE--------------DLDSLKGKTLTVAFLEVNRADKKLVLSERQA-------ARTALVREIEVGQLINGKVTGLKPFGVFVDL------------GGATALLPINQISQKFVADVGAIFKIG…
>non-CPR_non-CPR_Cyanobacteria_NC_019675
----------MAGTGNPAP------ARPSGSAPA----RKPQVLMIKKELAPASPGPSGAPPAASGPVA------APVRSPSP-SPDDEARFDLEGIEGLTMADLLGARTVDDF---DF---DE----------E-AFLAALDEN---PVGTTGEVVQGVVIGMESDGVYVDI-GGKAPGFMPKSECGLGVITNLKERFPKGLPIEVLVTREQNADGMVTISARALALRQSWEKVRQLEKEGKVVQVRVNGFNRGGVTCDLEGLRGFIPRSQLNEGE--------------NHEALVGQTLGVAFLEVNAETRKLVLSEKRA-------ATAARFATLEVGQLVEGQVVSIKPYGFFVDL------------GGVSGLLHQSSITGGALRDLREAFQQG…
>non-CPR_non-CPR_Cyanobacteria_NC_005071
----------MAGSGSPQP------PKPAAEAP-----RKPQVMHISKREAAEITSPGSKATAASGQLSN-----APNRSVSADAASDESRFDLGELQNMTMADLLGARSVDDF---DF---DE----------D-AFLAALDEN---PIGTTGEVATGKVIALESDGVYVDI-GGKAPGFMPKNECGLGVITNLKERFPKGLEVEVLVTREQNADGMVTISCRALELRKSWSKVQQMEKEGKVAQVKVNGFNRGGVTCDLEGLRGFIPRSQLQNGE--------------NHEALIGKTLGVAFLEVNPETRKLVLSEKRA-------ATAARFSELEVGQLVEGQVVAVKPYGFFIDL------------GGVSGLLHQSMITGGSLRSLREVFNQG…
>non-CPR_non-CPR_Cyanobacteria_NC_005072
MLSFIPSADSSSSR-RNND--------------------------------------------------------------------------------------------DTA---GF---TQ----------E-EFASLLGKY---YNFKPGDLVKGTVFALEPKGAMIDI-GAKTAAFMPMQEVSINRVEGLSDVLQPSESREFFIMSEENEDGQLALSIRRIEYQRAWERVRQLQKEDATIYSEVFATNRGGALVRVEGLRGFIPGSHISARK--------------IKEDLEGEYLPLKFLEVDEERNRLVLSHRRA-------LVEKKMNRLEVGEVVIGSVKGIKPYGAFIDI------------GGVSGLLHISEISHEHIETPHNVLNVN…
>non-CPR_non-CPR_Cyanobacteria_NC_008817
----------MKGVNDKGA------IKGQKN-------KKPQVLHISKKANFDDNQKLSN--GITKDINAT----KPQIIEAPLNEDKENHSANINLENKSYQELAKERKVDEF---DF---DE----------N-AFLEALNEN---PIGTTGETIKGKIIALESDGLYVDI-GGKAPGFMPKKECGLGVITNFKEKFPIGLEMEVLVIKEQNADGMVTISSRALILRQSWEKVENSAKNGELIQVSINGFNRGGLTCDVDGLRGFIPRSQLEDGQ--------------DYQSLVNKTLKVAFLEVNPESRKLVLSEKKA-------LLVSKFSGLKLGQLIEGEVLGIKPYGFFVDL------------GGASGLLHQSSITNGSIRNLREIFEEG…
>non-CPR_non-CPR_Cyanobacteria_NC_007577
----------M-GVSNKNA------PKGNKK-------KKPQVLHISKKEIQNEQNNSQE--EIKKENIAI----KPQIIKDESVNEIEDSNENTKAFDSSQQNLNRERTVDEF---DF---DE----------S-AFLEALNEN---PIGATGETISGKVIAIESDGLYVDI-GGKAPGYMPKKECGLGVITNFKEKFSIGLEMEVLVIKEQNADGMVTVSARALILRQSWEKVSNSAKNGELIDVLINGFNRGGLTCDVDGLRGFIPRSQLEDGQ--------------DYQSFVGKTLKVAFLEVNPESRKLVLSEKKA-------SLVSKLTSLDLGQLIEGEVLAVKPYGFFIDL------------GGASGLLHQSSLTKGSIRSLREIFREG…
>non-CPR_non-CPR_Cyanobacteria_NC_007335
----------MAGS-DPQP------QRPAINAP-----RKPQVMHISRKKEFSEQPKDRR--FAEKVLAPKSYLKKAPEQQNSIGKDSSDDFQSE-----TMEDLL-SRTVDEF---DF---DE----------D-EFLAALEEN---PIGTTGEIAKGSVIAVESDGIYVDI-GGKAPGFMPKNECGLGVITNLKERFPKGLKVEVLVTREQNADGMVTISCRALELRKSWDKVQNLAKEGKVIRVKINGFNRGGVTCDFEGLRGFIPRSQLEDGE--------------NHQSLVSKTISTAFLEVNPERRKLVLSEKKA-------AIASRFSELEIGQLIEGEILTIKPYGFFVDL------------RGVSGLLHHSMVTNGSMRSLREVFQPG…
>non-CPR_non-CPR_Cyanobacteria_NC_005042
MESFIPSADDPSSRVKKYD--------------------------------------------------------------------------------------------DGA---GF---SL----------E-EFDSLLGKY---YNFKPGDIVNGTVFALETKGAMIDI-GAKTAAFMPMQEVSINRVEGLSDVLQPSEIRQFFIMSEENEDGQLSLSIRRIEYQRAWERVRQLQKEDATIYSEVFATNRGGALVRVEGLRGFIPGSHISTRK--------------AKEELVAEYLPLKFLEVDEERNRLVLSHRRA-------LVERKMNRLEVGEVVVGAVRGIKPYGAFIDI------------GGVSGLLHISEISHEHIETPHSVLNVN…
>non-CPR_non-CPR_Cyanobacteria_NC_005042_2
----------MAGSGNPQP------PRQEQS-------RKPQVMHISRKESRQKSSTISK--GAKQPLSP-----NTSKPSENIAQNNQTAFDQEYEEGLSMGDLLAERSVDDF---DF---DE----------G-EFLAALDEN---PVGNTGETAKGSVIGVESDGVYVDI-GGKAPGFMPKSECGLGVITNLKERFPKGLEVEVLVTREQNADGMVTISCRALALRKSWDKVIQLAKEAKVVEVKLNGFNRGGVTCDLEGLRGFIPRSQLNQGD--------------DHESLVGKTINVAFIEVSPDNRKLILSEKKA-------ATAAKFAELEVGQLIEGKVISVKPYGFFVDL------------GGISGLLHQSMITNGSLRSLREVFNQG…
>non-CPR_non-CPR_Firmicutes_NC_018017
MAGFKQVVEKMER------ATCPFVQKAQQLAAESSQSQHPEVQGILGWVLAQTTQPAANFHGIVDELKKH--CNATEERQTV-----ARELA---GNVEVMIVVGG---NSA-NTASTPYKKMSTMEN-NETHEMMNMEDWAEEM--QNLHRGALVTGTVVKINHDEVFVDL-GWKSEGVISLKELTVASGLQPSDIVSIGDKISAVVLRVENEEGNPVLSKRRADEMAAVDKLKELAESKEEIQGKVADVVKGGLIVDV-GMRGFVPASQIQPGY------------VEDLNQFKGQTLRLRVIEFDPAKRRVVLSQKEILQEEQAAKKEHLLGTLQEGDVVSGVVKRLAQFGAFVDI------------GGVDGLLHVSDIAYTRVKHPSEYVNVG…
>non-CPR_non-CPR_Firmicutes_NZ_CP007032
MAGFQQVVDRLEK------ATCPFVQKAQKLAAEASQRHHPEVQGILGWVLAQTTQPHANFQRIVDELHQH--CNATEERQTV-----AWELA---GKVDVMVVVGG---NSA-NTASTPKKKMTEIDE----KD-IDMENWADHM--TKLHRGAVVTGTVVKLTHDEVYVDL-GWKSEGIISLQELSVAPVSNPSEVVSVGDEIRVVVLKVENQEGNPVLSKRRAAEEEASERLEQLAESKEELQAKVTEVVKGGLLVDV-GMRGFVPASQIQLGY------------VEDLKQFLGQTLRLRVIEFDPAKHKVVLSQKVILAEEQVSKRAELFETLQEGDTVTGVVRRLADFGAFVDI------------GGVDGLLHVSEMAYSRVKHPSEIVNVG…
>non-CPR_non-CPR_Firmicutes_NC_018068
MAGFQQVVQRLEK------ATCPFVQKAQHLAAESAQKLHPEVQGILGWVLAQTTQLAASFAEIVEELKQH--CNATAERQKA-----ARELA---GIVDIMVVVGG---NSA-NTASTPFKKMSEINED------MDMASWDVGF--QELHLGAQVTGKVVKITNDEVFVDI-GWKSEGVIPLSELKVARQTNPADVVSIGDEITAVVIRVENSEGHTVLSKRKADEAGAQDRLKQLAESKEEIQAKVIETVKGGLVVDV-GMRGFVPASQIQLGY------------VEDLNQFLGQTLRLRLLEFEPAKRKVILSQKVILEEEKAKKRKHLLETLKEGDVVSGEVRRMADFGVFVDI------------GGLDGLLHISDMAYTRIKHPSEILKVG…
>non-CPR_non-CPR_Firmicutes_NC_018515
MAGFQQVVKRLAE------ATCPFVQKAQRLAAMSAQKLHPEVQGILGWVLAQTTQLAENFAKIVEELQNH--CNATAERQKV-----ASELA---EVVDVMVVVGG---NSA-NTASTPFKKMTEMNE----QQ-MDMASWLDSC--PELHNGTKVTGTVVKITREEIFVDI-GWKCEGVIPLGELSVSRKTRPEDTVSIGDQISAVVVRVENEEGHTVLSKRKADEEGAKDRLEKLVESKEEIQAEVVEVVKGGLVVDV-GLRGFVPASQIQLGY------------VDDLDQFLGQTLRLRLIDYDPAKRKVVLSQKVILEEERAVKRTQLLESLKEGDVVTGTVKRMADFGVFVDI------------GGIDGLLHISDMAYTRIKHPSDMLKIG…
>non-CPR_non-CPR_Firmicutes_NZ_CP007033
MAGFQQVVDYLAE------ATCPYVQKAQRMAASSSANSHPEVKGILGWVLAQTTQQKSHFFTVVEELKKH--CAATEERQAS-----ARELA---EKVDLMIVVGG---SSS-NTASTPYKKMSEFMEKTQIQE-NMMENFDKGL--PKLYRGAIVKGTVVKITGDEVFVDI-AWKSEGMIPFEELSATKVSNINDLVKIGDTISVMVMRVENQEGYPVLSRKRANEVEAKEQLAHLAESKEEVQAVVTEAVKGGLLVDL-GMRGFVPASQVETGF------------VDNLEKYIGKTLRLRVIEYDEYKKKLVLSQKAILAEEQEGKKEKLLETLKEGDIVKGTVRRLADFGAFVDL------------GGIDGLLHISDMAFSRVKHPSEIVNVD…
>non-CPR_non-CPR_Firmicutes_NC_015172
MAGFQQVVDYLTG------ATCPFVQKAQRLAAEASKSNHPEVQGILGWVLAQTTLPRSTFLEIVEELKSH--CNATSERQDS-----AAEVS---ERADLMIVVGG---HSS-NTASTPYKRMSEILENKDNEE--TMENFEGSL--PELYRGALVKGTVVKMTHDEVYVDI-SWKSEGVIPQGELSAVRGTRPEEVVKLGDEIEVVVLRLENEDGHPVLSKRRANEIKAREVLAKAAETKEEIQAVAVEVVKGGLLVDL-GMRGFVPASQIQPDF------------VADLNQFVGQTLRLRIIEFDEGKKKLVLSQKAILAEEREQEKEKLFATIKEGDVVQGVVRRLTDFGAFIDL------------GGVDGLLHVSDMAFSRVSNPSDIVNIG…
>non-CPR_non-CPR_Firmicutes_NZ_CP022121
-AGFPQEVERLKQ------ATCPFVKRAQLYAKDLAENNHPEVEGIVGWVIAQTTQQVHNFQQVAEVLKNK--CLATAERQKA-----TEKLA---QEVDLVLVVGG---NSA-NTASTPLQRMMEFTDQENLEE-SFADSFDTGI--KQVRRGERVSGVIVQVRDSEVLVDV-GGKSEGVIPRSELTAFEAENIHEALKVGDQIEVVVLKKENDEGHPVLSKRRVDQEKNWEKLIDAMESGEYVTGKITEVVKGGLLADV-GVRGFIPASLVELGY------------VEDLKPYVGRELTLKVLECDRNTNKLVLSAKAVLQEESAKKKAETWEKISEGQTVHGIVRRLTSFGAFIDI------------GGIDGLLHVSEMAWYRVSHPSDVLKEN…
>non-CPR_non-CPR_Firmicutes_NC_010337
MAGFPQVVERLAR------ATCPFVHKVQKLAKDFTDQNHPEVQGIVAWLIAQTTLKEATLRHIESALRGK--CAATSKRQDA-----ARRLA---AEVDVMVVVGG---NSS-NTASTPVQRMTDVNQETELNE-DMDKMFAESL--KKMEEGQLITGIVVKVTHDEVLVDV-AGKSEGVIPIRELATRMPNSASDIVKVGDEVKVVILKAESEDGTLVLSRRRAIEREKILHLQEAKERGDIITGEVIAVVKGGLRVDV-GVIGFVPASQVERGY------------VENLEKYIGQTLRMRIMEIDTRRNNAVLSQKVVLEEEYKEARAKTWEEIEEGQTRRGTVRRLTDFGAFVDL------------GGVDGLLHVSEMSWGRIKHPSEVVKEG…
>non-CPR_non-CPR_Firmicutes_NC_021184
MAGFDQVIEALAR------ATCPFVRKVQRTVRDLVQQKHPEVEGIVGWVVAQTTQRQNNFDAVVKVLKDS--CLATAERQKE-----AQELA---QQVDAVLVLGG---NSA-NTASTPSCRMMDFEE-TNKEE-KQEMEDAVEV--KNLKNGDIVTGVVVQVNQDEVLVDV-GAKSEGVIPIRELSNFSVDSPQDVVKVGDEIKVYVLKSEDNEGRVILSKEKADAEEAWARLEETMNEGQVVSGSVREVVKGGLLVDV-GVRAFLPASLVDRGY------------VEDLSKYLNMEIDARVIELNRARRKVILSRKAVLEEEYARKREELLTNLEEGQVVNGIVRRLTNFGAFVDI------------GGVDGLLHISEMAWYRINHPSEVVQVG…
>non-CPR_non-CPR_Firmicutes_NC_009253
MAGFPQVVQNLAE------ATCPFVARAQKYAHEMAAQGHPEVQGILGWVVAQTTQPLSNFQALLEALQNQ--CHATGERQRA-----AMELA---REVDVMVVVGG---NSA-NTASTPKKRMNEMDQMTNGEE---GMSEAMEV--KSPQAGELVKGIVVQVGMDEVLVDI-RAKSEGVIPRKEMAFYGVDNLQEIVKVGDEIECVVIKAEDNEGKIILSKERADAEKAWDGLEEAMEQGTIIKGVVREVVKGGMLVDV-GVRAFLPASLVERGY------------VEDLSKYLNQEFEVRVIEMNKQRKKVVVSRKAVLEEQNARKREELLASLQEGQIVKGIVRRITNFGAFVDL------------GGLDGLLHISEMSWHRINHPQEVVKVG…
>non-CPR_non-CPR_Firmicutes_NZ_CP019698
MAGFPQVVQDLAQ------ATCPFVAKAQKYAREMAEEGHPEVQGILGWVVAQTTQPLANYQRLVEALQEQ--CHATGERQRA-----ALELA---QEVDVVVVVGG---TSA-NTASTPKRRMNELDQMTNGDE---TMNQAMEV--KSPRTGELVKGVVVQVSNDEVLVDI-GAKSEGVIPRKELAFYGVDNPQEIVKLGDEIECVVIKAEDNEGKILLSKVRADAEKAWDNLEQAMENGTIIKGTVREVVKGGLLVDV-GVRAFMPASLVERGY------------VEDLSQYLNQEVEVKIIEMSKPRKKVVVSRKVVLEEESARKREELLTTLQEGQVVKGIVRRLTNFGAFVDL------------GGLDGLLHISEMSWHRINHPQEVVKVG…
>non-CPR_non-CPR_Firmicutes_NC_015589
---------------------------------------------------------------------------------------------------------------------------M-------------F-----Q-------K-------------P------I-NSLGQG------------------M------------SE---GFKTL------DSNTWEFLYDAQRKNKIIQGSVSGVESGGLIIFIGSIKGVILPDEIGEP------------RPKYLSALIGAPVAFKVKQCARSQGVAYLSRKDALA----EMAGATWEEIQVGPVRTATVRSVVKEGAYMDI------------GGVSAYLTVRDMSWGRVEDARELVRPG…
>non-CPR_non-CPR_Firmicutes_NC_015589_2
MAGFPQVVKDLAN------ATCPFVARAQRYAREMAEQGHPEVQGILGWLVAQTTQPLANYQAVVEALQKQ--CHATGERQQA-----ALELA---KTVDVMIVVGG---ESA-NTASTPKRRMNEMDQM-NGEE---AMQDAMEV--KSPRAGELVKGVVVQIGMDEVMVDV-GAKSEGVVPRKELACYGVDNPQDVVKVGDEIECVVIKSEDNEGRLILSKERADAEKAWGGLEEAMEKGTIIQGTVREVVKGGLLVDV-GVRAFMPASLVDRGY------------VEDLSKYLNEKISVRVIEMNKQRKKVVISRKAVLEEEYARKREELLETLEEGQTVKGIVRRLTQFGAFVDL------------GGLDGLLHISEMSWHRINHPSEVVKAG…
>non-CPR_non-CPR_Firmicutes_NC_015565
MAGFPRVVQDLAQ------ATCPFVGRAQKFAREMAEKGHPEVQGILGWLVAQTTQPVANYQGVVEALKQQ--CLATGERQRA-----ALELA---KQVDVMVVVGG---ESA-NTASTPKRRMKELDQMTNGEE---EMKDAMEV--KSPQAGELIKGVVVQVGPDEVMVDV-GAKSEGVVPRKELACYEVDNPQDVVKVGDEIECMVVKAEDNEGKLILSKVRADAEKAWGSLEQAMENGTVIKGVVREVVKGGLIVDI-GVRAFLPASLVDRGY------------VEDLSKYLNQEVEVRVIEMNKQRKKVVVSRKAVLEEQYARKRAELLAGIQEGQTVKGIVRRLTNFGAFVDL------------GGLDGLLHISEMSWYRINHPSEVVNVG…
>non-CPR_non-CPR_Firmicutes_NC_013216
MAGFPQVVDKLAQ------ATCPFVSRAQQIARDLYTEDHPEVQGIVGWVLAQTTQPLVNFQQVVDVLKQK--CHATGERQQA-----ALELA---RNVDVMVVVGG---NSA-NTASTPKKRMNELGEMNSAEE---GMQDSVEV--KALHNGDIVKGVVVQIGQDEVLVDV-GSKSEGFISAKELSSFNINSPDEVVKIGDEIDVFVISAEDNEGRIKLSKTRADAENAWAKLESLLESSEKIEGTVREVVKGGLLVDV-GVRAFLPASLVDKGY------------VEDLSKYVGENITAQVIEINRIRRKVVLSRKAILEEEYANRKEELLNSLQEGQTVSGIVRRITNFGAFVDI------------GGVDGLLHISEMAWYRVTHPSEIVQVG…
>non-CPR_non-CPR_Firmicutes_NC_014220
-AGFDAVVAYLCE------ATCPLVGRVQSLARQLREETHPEVLGILGWVVAQTTKSEEDFYSVAAELLPK--CEATKKRQQA-----ALELC---GKVDIMIVVGD---KSS-NTASTPLDKMVEFEGN-EIREFVEMEAEESLG--KGMDRGSVVTGVVIQVTDDEVMVDV-GGKSEGVIPLRELSVRDVSSAKEVVKEGDTIEVYVLRWDD-DGTILLSKKRVDMKKAMDRLEEAFRNGEVIEGTVLKSVKGGLLVDV-GVVAFLPASHVDQGF------------ARNLEEYVGQTLPVKVIEFNRNKRRVVVSRKEVLIEEKERKRKEFWDNIEEGQIRQGVVKRLTDYGAFIDL------------DGYEGLLHISEMAHSRVEHPSQVLTEG…
>non-CPR_non-CPR_Firmicutes_NC_008346
MAGFDEVVNYFRQ------ATCVLVKKIHEIVTRLRGERHPEVEGILGWLISQTTRDEKEFQKVAGALSNK--CSATRSRQEA-----ARELC---RKVDLMLVIGD---KSS-NTASTPLDRMTLYEEEPEVKEFAKLEAEDFTT--P--NKGDVIKGKVIQVLDDEVMVDV-GGKSEGIIPLREMSLQDIDSAKELVEVGDEIEVMVLKWDD-DGTILLSKKKVDAKILLDELEESFKEGKVITGTVTGSVKGGLLVDV-GIVAFLPASHVEDGY------------VKNLDEYINRELSFKIIEFNRNKRRVVLSRKELVAEEKAKQKKQFWEEIEEGQVRKGRIKRLVDYGAFIDL------------GGYEGLLHVSEIAHTRIDQPSDVLQEG…
>non-CPR_non-CPR_Firmicutes_NC_018870
GAGFPQVVDSLRK------ATCPFVRRIQNQAAELVREDHPEVRGILGWLLAQTTQNRSHYFAVARSLLGK--CHASQARQEE-----AAAIA---QRADVMIVIGG---DSA-NTASTPIESMAMFDEESDTEE-EMMNLDLGTP--RQIQQGDIISGSVVQVRDDEVLLDI-GGKSEGVIPRQELSLKNTGNPIEEIKVGDVLDVYVLRVDNDEGQLLLSKKRADRIKALDFLEKALAEKTELAGEVVRVVKGGLLVDVLGIRGFVPASLIERGY------------VGDLEKYLGKTLRLRVIEFDRNKAKVVLSQKAILQEEHLEAQRRLWETIEPDQIRKGTVRHLTNFGAFVDL------------GGVDGLLHISELSWGRVKHPSDVVQEG…
>non-CPR_non-CPR_Firmicutes_NC_014831
MAA-TEALAQLQQ-------------------------DRPQPEGEPGG------------------------AGSTGAGGDA-----APGDA---QGVTATAQAAG---EAG-EAAGAPAGTQPATAG-GTAVE-AAMDEQ--------LSRGQVVTGTVVQVADDHVLVDV-GHKSDGTIPRNELRLLGGKQPDEVYHVGQEIPVVVLGFTDGEGGLLLSHRRAVEREAWDALRRAYEAGEPIEVPVVEQVKGGLVCDA-GVRAFMPASHVERGY------------VADLSHYVGTTVRAKIIEFDRNKRRVILSRKELLEEEARRRAEETLASLEEGQVRTGVVKGLTDFGAFIDL------------GGVDGLLHVSEMHWGRIDHPRDLLKEG…
>non-CPR_non-CPR_Firmicutes_NZ_CP009170
---------------------------------------------------------------------------------------------------------------------------M----------S-DFLE--DYSF--KIVRTGDIVKGKVIRVSDEGVIANI-GYKSDAFVPKNELSLNPNFDVKKVFNIDDELDLYIINVENEEGNVLASKVMADQQLSKEKLQKAYENSDILEGEVIEVVKGGVIAYILGVKVFIPASQLELHY------------VDNLDEYLGKTVRIKIIEYIPNKK-IIASQKEVLKSEKEEAKKRLLSTLKEGDIVEGVVKNVVNYGTFVDI------------GGFEGLIPLREMAWGKIKDPNEILKVG…
>non-CPR_non-CPR_Firmicutes_NC_015958
----------M---------------------------------------------------------------------------------------------------------------GM----------S-DFLE--GYTF--KTLRPGNIVKGKVIKVSDEGIIANI-GYKSDAFVPKNELSLNPNFDVKKTFNVEDELDLYIISVENDEGNVLASKVMADDKLSREKIEKAYKNKEIIEGEIIEVVKGGVIAYSLGAKVFIPASQLELHY------------VDKLNEYLGKTLRLRIIEYIPGKK-IVGSQKEVLKLEREKVKKALLSNLKEGDIVEGKVKNIIDKGVFVDI------------GGFDGFIPLSEISWERIKNPREVLGIG…
>non-CPR_non-CPR_Firmicutes_NC_003869
-----------------------------------------------------------------------------------------------------------------------------------------------------------------------------------------------------------------------------------MTEAWQDIYASRQSNKILTGTLSAIE-SQAVIFYDGVKVIIPFEEMGIE----------NINKTIVRSMIGAEIDFVVRGIDTEKEIAIASRKFAMN----LRKKYELPKHEEGDVILARIVAIGKNHAIAEV------------YGIETKVPKEEIGYGYIDRINDLLQVG…
>non-CPR_non-CPR_Firmicutes_NC_003869_2
----------M---------------------------------------------------------------------------------------------------------------RM----------N-DFLE--GYVF--RPIKAGDIVKGKVVKVLEDGVVADI-GYKGEAFVPKEELSLNPEFDVLSNFHEGEELDLYIVMVENEEGSVVASKIKAEEKLGEEKIEKAYKNREIVKGEVVKVVKGGVIAYSLGKRLFIPASHLSTKR------------VENLEEYLGKILELLIIEYVPGKK-IIASRKEVIKLEEEKMKAELLERLEEGDVIEGKVSRIIPKGAFVNL------------GGMDGFIPISELGHGRIKSPEEVIKPG…
>non-CPR_non-CPR_Firmicutes_NC_013385
--------------------------------------------------------------------------------------------------------------------------------------------------------------------------------------------------------------------------------MQVLPETWIEVAWARRTGKVLTWPAKGIEDGDLVVMKDGVKGLIPLPEAGVGA----EDGELREARNRLRYLVGQPVDFVVTWCHEDTLTFRASRKKALE----VKARDAWLRLRPGERVEALVRRPAFRKFVVEV------------DGVEGFLPRGELSWGWVDDPLKLLRPG…
>non-CPR_non-CPR_Firmicutes_NC_013385_2
MAGFPQVVEFLAA------ATCPYVRRAQELACELAKQDHPEVKGILGWVVAQTTQPVNRLQEVVQALLPR--CSAVASRIES-----ALELA---REVEVMVVVGG---SSA-NTASTPEKRMREIGE-MSAAE-Q-ME--AVGV--KTFRGGEIVRGTVVEINQGEVLVDI-GAKTEGVIPLRELCCCEVSSPHEVVKVGDEIDVFVVKAEDAEGRIILSKARADAIAAWKKLAEAFANGTPVEGIVREVVKGGLIVDV-GVRAFLPASLVDISY------------VENLSTYLGQKVRAKVIELDRSRKKVVLSRKAVLEEEAERRRRETWEKLQEGAVVKGVVRRIVPFGAFIDL------------GGVDGLLHVSEIAWHRVNSPDEVLKEG…
>non-CPR_non-CPR_Firmicutes_NC_010718
LAGFKEVIQNLTE------ATCPFVRKVQQKASKLYQDNHPEVKGIKEWVVAQTTLREEKFNEIVEKILDR--CDATQKRQTA-----TKELA---GQVDVMIVVGG---NSS-NTASTPVGKMREFEEQTNSDE-ELMKATEDSA--DKLDRGQVVKGKVVKVTEDEAMIDV-GYKFEGSVPVNEMPIKEGESLEDLLSEGDEIDVKVVKVDDEEGQLILSKKWADKDKQWEQLEQLMENDEEIKAQVTEEVKGGLVVDLGQLQGFIPASHVDIHY------------VPDLSKYVGEELRLKPIELDRSRNKIVLSQKNILEQEQEEKKNKTMETITEGDIVDGTVKRLTDFGAFIDI------------GGIDGLCHISQISHSRIDHPESELETG…
>non-CPR_non-CPR_Firmicutes_NC_006177
----------M---------RC----------------SEP--------------------------------------RRST-----VQEFDTQ-----------G-----K-NV------TM-E--------EAEARAELEAAL--RVPKPGDIVRGQVVRVSDDSIMVDV-GYKSEGIIPLNELSHRPLRSAHDALKVGDEVQVVVLSVDTGEGGLRISKRRADEQLAWAEVERKFEAGEVIEAEVTEAVKGGLVVDL-GLRAFLPASQVDRGY------------VADLSKFVGQKIRVKIIELDPYKGRVILSRKQVLEAERTAARERFWSTVQEGDVLEGTVKSITDFGAFIDL------------GGVDGLLHISEMSYGRIKHPSQVVSEG…
>non-CPR_non-CPR_Firmicutes_NC_014098
---------------------------------------------------------------------------------------------------------------------------MDE------------MRDM-TDL--VALHKGDVVKGRITKIEDGQVFVDV-GYKFDGVIPIGELSALRVESPSDVVQVGDEVEVRVQRINDEEGKLVLSKKAVDAEKAWERLQQRFESQETFEVQVADVVKGGLVADV-GVRAFIPASLVERHF------------VEDFSEYKGRTLRVKVAELDRSDNKVILSQKAVLEEEYQQKKEEVLHRLQPGDIITGKVQRLTNFGAFVDV------------GGVDGLVHISELAWHRVEHPSEVVKEG…
>non-CPR_non-CPR_Firmicutes_NC_013205
---------------------------------------------------------------------------------------------------------------------------MSE----------DLREML-TD---AAVREGDVVTGEVTAVDDHGVTVAL-PHGYEGHISPQELSAVPGTHPSDVVSVGSTVTAQVLKVDMESGHVTLSKRRAEQASAWERMQQLLESGEPIEVEIRDVVKGGLVADV-GVRAFIPASLVDRHF------------VENLEQFKGQKLRAKVIEVDPQKNKLILSRRAVLEEESEARARKLFEELKPGDVIEGTVQRLTDFGAFVDV------------GGADGLVHISELSFSHVNHPSEVVREG…
>non-CPR_non-CPR_Firmicutes_NZ_AP014924
---------------------------------------RPESEGAPGG---------------------------EGAAGEA-----SRGVD---PDASGEEEARG---ESQ-AVAPPPAAREAHVNG-ATASE-RPADATEPGF--EPLSAGQIVRGHVAQVNDDEVLVDV-GYKTEGRIPLHELNIPRDTKPSDLFKRGDEIDVFVIKVEDAEGTVLLSKRRADYRLVWERLERHFKEGEPLEARVTERVKGGLLVDV-GVRGFLPASHVDIRY------------VEDLSQFVGQTLRLKVIEIDRQRNNVVLSRKEVLEKEMESSKVELLASLKPGTAVDGVVRRLTDFGAFVELE-----------GGVEGLLHVSEMAWSRVRHPRDVVKEG…
>non-CPR_non-CPR_Firmicutes_NC_014410
---------------------------------------------------------------------------------------------------------------------------M----------D-DFMD--EYSF--NLIHAGDIVKGKIIKILSDGIIADI-SYKADAYVPKDQLSLDPNLDINKFFNVGDEIDLYIVKREDENGDVLASKIKADTELAKEKLDTAYKNGNILSGKIIEIIKGGVLADILGVKAFIPASQLDIHY------------VNNLNDYLGENVKVKIIDYIPNKK-LIASQKVVLEEEKLKKKEELLKTLQEGQVIQGVVKSITKFGAFIDI------------GGIDGLIPLSEISWVRNKNINDILHIG…
>non-CPR_non-CPR_Firmicutes_NC_015555
---------------------------------------------------------------------------------------------------------------------------M----------D-DFMN--EYTF--NEIHSGDIVKGKIIKILNDGIIADI-GYKSDAFVPKSQLSLNPNIRISDDFNVGDEIDLYIIKREDENGDVLASKVKADTELAEERLNTSFKNGDILNGKIIEVVKGGVVAEVLGVKAFIPASQLDMHY------------VDDLNSYLGEKIEVKIIDYIPSKK-LVASRRIVLEEEKNKKKETLLKNIREGQVINGVVKSITKFGVFVDL------------GGIDGLIPLREISWSKNVNINDVLHIG…
>non-CPR_non-CPR_Firmicutes_NC_015520
MAGFPQVVEDLS-------ATCPYVARVHKKVEEYYRKDHPEVIGTNGWVVAQTTLNGSKWEDILKILLPK--CYATSQRQEE-----ALQIA---KLSTAVIVIGG---NSS-NTASTPITKMEEIEEENDNDEVDFAKGLEETL--VTYHVGQMVSGKVASVSDSEIIVSL-GGKQDGVIPREEMGLDEGVSPSEVFHIDDDIEAQVKKTRNEEDNLILSRKPLLLRKAWAAIEDAYNTGNNITGVVKEVIKGGILLDVNGIDVFVPASHVSDRY------------VKDLNVLVGKEMEVKIIEITPKRRRAVGSHKAVIEQEKWQKEEEAWANIREGLRITGKVKNVTDFGAFVDI------------GGVDGLIHIGDLSWGRIKHPSEVVKPG…
>non-CPR_non-CPR_Firmicutes_NC_015520_2
---------------------------------------------------------------------------------------------------------------------------------------------------------------------------------------------------------------------------MAITETILVNDSWRDIYASRQSRKILTGILSAIELNGGVVFYNDIKVIIPADEMGVR----------E-DWQVIRSMIGSEIDFIVYGIDTEEGVVAASRKAAQE----LRRTLELPKHKAGDIISARVVGVGRNSVIVDC------------YGLEVRIARNEIDYGYVGNAGDYVQIG…
>non-CPR_non-CPR_Firmicutes_NZ_LT700187
SAGFKDVIADLEK------LTCPFVARIHSRVIEAGD-NHPEVIGIKGWVVAQTTITHRLWDEVVSALKTR--CDTTQKRQKE-----AVELA---RASDIVLVVGG---HSS-NTASTPKTLMSEMEEEEQSNE-DFMAEIEKSF--VYIKRGQIVTGTVVQISDSEICVNI-GYKSDGIIKKENLTAAGDENPMDLFKVGDEIEAEVVTLNDGEGNVVLSRKSIESKLKWKELVESLDENAVYTVKVDKVVKGGVLAKLDGYDAFIPASQLSLRY------------VEDLSEFVGQELEVNIIEADKRQRRFVLSHKNILKAQAEEQEKKLYETFKKGDKVTGKVKRLTDFGAFVDI------------GGIDGLLHITDISWVKIKHPSDVLNVG…
>non-CPR_non-CPR_Firmicutes_NC_011898
MAGFDQVVQKLTK------ASCRYVEKIHSLVNKKYKETHPEIIGINGWVVAQTTFIREKWEKIILRLNKR--CNATDKRQTE-----AEKIS---KIVDMVLVIGG---NSS-NTASTPIHKMSEL------QD-SFADAFESSL--VTLTTGQITKGKIIGYNNNEVFIDM-GYKSDGIIPMQEFSDDPDFNPEKSLKVGDEIDVFVVRVNDGEGNVLLSKKRVDAVKGLEVIERAYENKQPVKVKITEKVNGGVIGNASGVRVFIPASQISDRF------------VKDLSEFVKQVLQVEIIELNKQKRKVVGSARILIEKNKEAASSLIWDSIEIGKTYKGQVKSLMDFGAFVDI------------GGVDGLVHLSELSWNKIRHPSEVVKVG…
>non-CPR_non-CPR_Firmicutes_NC_016627
MAGFDQVVEQLRE------ATCPYVKKIHNLVNKKCTENHPEVIGISGWVVSQTTLSRKKWEEIVEYIEKK--CSATSKRQDE-----VDEIS---KIVDMMIIIGG---HSS-NTASTPIKKMSDLNNKVDMQE-NFADAFEKSM--VTLRDGDVVTGKVIGYNNKEIFVDL-GYKSDGIIPIEEYTDEPDFKISDEVKVGDEIEVYVKKVNDGEGNVLLSKKYLDALKAWDDIAKAYEDKTPVRAIVIEVVNGGVIASAKGVRIFVPASQISDKY------------VKDLNEFLKKPINVRIIEFNEKKRKLVGSARVILEEEKEKKLKEFWANVEVGKIYNGVVKSLTDFGAFVDI------------GGVDGLIHKSELSWSKIKHPSEVVKVG…
>non-CPR_non-CPR_Firmicutes_NC_009012
MAGFAQVVDLFTS------ATCPYVKKIHNLVKEKSEENHPEVIGINGWVVAQTTITNEKWLEVNTALKKK--CSATSRRQNE-----AEEIA---KNVDMMIIIGG---NSS-NTASTPIKKMSELNKQVDIND-DFANAFENSF--VRIHAGDTVKGKIIGFNSNEVFVDL-GYKADGIIPLEEYTDDPNFNIEKEVKIGEEVEVLVEMVNDGEGNVRLSKRKVDAIKSWDDIVKAYENKTPVNAYVVEVVKGGVIASYKGVRIFVPASQVSDRY------------VKDLNEFLKRSITVRILELNEKRRKVVGSARVIIEEEKEALANRTWNSMEVGKVFKGTVKSLTDFGAFVDI------------GGVDGLIHISELSWTRVKHPSEVLKVG…
>non-CPR_non-CPR_Firmicutes_NC_020134
MAGFRQVMEELAQ------ATCPYVKRIHKLVRQKHAENHPEIIGVNGWVFAQTTMKQEKFDGIYEAVKKK--CNATEVRQRE-----AREIS---GTVDMMIVIGG---NSS-NTASTPIETMEELRN----QEKEAFEAYESET--GDLRAGEIVKGRIIGYNTSEVFVDL-GYKSDGTIPLEEFLDDPDFDPEKDLKEGDEILVYITRVNDMEGTVSLSKRKVDLIYGMEEIEKAYNEKKPLEAVVKEVVNGGVVANYKGIRVFIPASQISDQY------------VKDLNQFLNKKVKFEVLELSKNKRRVVGSRKNVLEKEKAQKLEEFWNNIEIGKEYTGTVKSLTNFGAFIDL------------GAVDGLVHISELSWKKVNKPSDILKVG…
>non-CPR_non-CPR_Firmicutes_NZ_CP011307
MAGFDHVTAHLEE------AACPNVTKIHRLVERAEESTHPEVVAIAGWFVSQTTSTQKIWDACREKVKKE--CSATYVRQSE-----AQELA---ARCDAMIVIGD---KSS-NTASTPYDKMSE---E---EE-SFADLLEKSI--KTLNTGEKVTGVVTEITPTEIYVDL-GTKHAGYIPVSELSDDPTVKVEDIVKIGDEIETYVMRVNDAEGVVTLSKKRLDTVKSWDDVEQAREEGTIVEGVVTEENKGGVVASVKGVRVFIPASQTGLPR------------DAAMSDLLKKKVRMKITEVNRARRRVVGSIRAVEQAERAEKSAKVWAEIENGKRYSGVVKSLTSYGAFVDI------------GGVDGMVHISELSWSRIKHPSEVVSVG…
>non-CPR_non-CPR_Firmicutes_NZ_CP011307_2
----------M---------------------------------------------------------------------------------------------------------------GM----------S-HF----------------------------------L--------------------------------------PE---GRRLTAPDNLAACATVSALRSARDRGMILEGRALSSTDHDLTVAV-GFTGRIPREDTAL----GVAEGTT----KEIASRVGKPVCFTIVSVSGPDSVLVLSRRRAQE----IAQQALMSELKPGMVIPATVTHMEPFGAFVDI------------GGLVSMIGIEHISISRIPHPSCRFSVG…
>non-CPR_non-CPR_Firmicutes_NZ_CP015406
MAGFRDVIAYLES------ATCPNVSRIHQIVSRAEEGTHPEVAAIAGWMVSQTTSTRFIWDSCVEKAKKE--CNATCKRQSE-----AQALA---ARSDAMVVIGG---ESS-NTASTPYDKMSE---E---EE-SFAEMLEKSI--KTLNTGEKVTGVVTGITPTEIYVDL-GTKHAGYIPVSELTDDPTAKVEDLVKIGDEIETYVMRVNDQEGVVTLSKKRLDTVKSWDDIEQAREEHTTVEGVVTEENKGGVVVSIKGVRVFVPASQTGLPR------------ETPMSQLLKQHVRLRITEVNRARRRVVGSIRAVEAEERAAKAAEVWANIEENKRYTGTVKSLTSYGAFVDI------------GGVDGMVHISELSWSRIKHPSEVVSVG…
>non-CPR_non-CPR_Firmicutes_NZ_CP015406_2
----------M---------------------------------------------------------------------------------------------------------------TL----------S-RF----------------------------------L--------------------------------------PE---GRLLHTPENEAACASCDGLRRAMEEGTVLEGVAQLDGAHNLLVSV-GFTGFLPREEAAL----GIAEGTT----REIASRVGKPVCFQITALEESEGRPRLSRRRAQQ----AALDAMLAGLHPGCILPAVVTHLESFGAFVDI------------GGVPSLIGIENISVSRIPHPDQRFRVG…
>non-CPR_non-CPR_Firmicutes_NC_016048
----------------------------------------------------------------------------------------------------------------------------------------------------------------------------M--------------------------------------PE---NK-IYLPEGLRPCASLNLLRESLDQNTILEAPVERDGSRTLHISL-GAEGLIPREEAIS----PWISGAD----RDIASLVGKPVCFTVTSLTADEKHALLSRRAVQE---K-AMDHLLETLEPGMLLTCRVTHMESFGAFVDI------------GGIISMLPIERISVSRIPHPAVRFRTG…
>non-CPR_non-CPR_Firmicutes_NC_016048_2
MAGFAHVIAELE-A-----AACPNVQRIQTLAAQAEEAHHPEILGIASYVVAQTTCIRKLFETSAKILKKE--CNATHRRQSE-----AADIA---ERVDVMVVVGD---RSA-NTASTPYATMSEIKTE---EE-SFEELLNQSF--KTLNTGEKVTGIVTAIGPTEVQVDV-GAKQAAYIKASELSNDPNVKPEDILKVGDEIEAYIVRVNDVEGYAELSKKRLDAVKVWENIEQAVEDKTVMEGNVTEVNKGGIVVSVKGVRVFVPASQSGMPR------------GANLETMVKSNVQLRITEVNRARRRVVGSIRSVLDEARKAAQEEVWNNIEVGKRYTGTVKSMTAYGVFVDI------------GGVDGMVHISELSWSRIKTPSEVCKVG…
>non-CPR_non-CPR_Firmicutes_NZ_LM995447
---------------------------------------------------------------------------------------------------------------------------M----------A-VI-------------K-----------------------------------------------------------PE---GWLLDTAENREALRSPANLLRAEEEGRTVEARALVDSSHNLIVDL-GMKGIIPREEGAL----GLDDGTT----RDIASRVNKAVCFKIISLPHPPDMAVLSRRAAQE----EAVRLYISKLKPGDIIDARVTHLEPFGCFVDI------------GGIASLIPIDLISVSRIAHPRDRFRVG…
>non-CPR_non-CPR_Firmicutes_NZ_LM995447_2
MAGFERMVHELS-------ATCPFVEKIHKLVSKEMPDKHPEVQGITGHVVAQTTFNTEIWDKCNNFIKKV--CSATSIRQKE-----AKEIA---ARSDLMLIIGG---NSS-NTASTPLIAMADLDND---DDISFAEALEKTL--KTVNADDIVRGVVVGISPNEVQVDI-GTKHAGYIPLSELTDDTSAKPEQIVKVGDELDLVVLRVNDQDGTVMLSKKRYDAIKGWEDIVKASEDGTVLEGVVTDVVKGGLLASVHGVRVFIPASQSGAAR------------DEKLDKFLHQNVKLIIIEINKSRKRAVGSIRQVLREERRKQAEAIWNEIEEGKEYKGVVKSLTNYGAFVDI------------GGVDGMIHISELSWSHIKHPSEVVSVG…
>non-CPR_non-CPR_Firmicutes_NC_014828
---------------------------------------------------------------------------------------------------------------------------M----------A-EI-------------K-----------------------------------------------------------PE---GWLLDTAENREALRTPGGLLRAKEEDRILEARALVDSEHNLIVDL-DMKGIIPRQEGAL----GLEEGTT----RDIASRVNKAVCFKILDIKRQPDQAVLSRRAAQQ----QAQADYISRLTPGDVIDVRVTHLEPFGAFVDI------------GGIPSLIPIDLISISRISHPRDRFHVG…
>non-CPR_non-CPR_Firmicutes_NZ_CP010978
MQGFPQVVKRFSD------ATCPHVKKAQQAAYELLQDHHPEVKSILEWVVVQTTFSGEVFQTIVNVLQTK--CTATDLRQQS-----ALDIA---AKVDVMLVIGG---NSA-NTASTPYQKM----------Q-EFNQLLDNEV--IKLEQGSIVKGKIVGIRKDEVFVDI-GYKGEGSISLAELAYPAPENAAEVVSEGQIIDVLVLDLESNDG-IKLSKVKADAIVAWDVLEEALENKKQVEAKVLEVVNGGLKVSVLGIHGFVPASQVELRF------------VEDLSPFKGQTLTFQPIEVDRIKKRVILSRKVILQEQRRILEEETFSKLAVGQIVSGTVRRIVDFGAFIDI------------GGIDGLVHISDLSWHRVKSPQEIVALG…
>non-CPR_non-CPR_Firmicutes_NC_017068
---------------------------------------------------------------------------------------------------------------------------M----------E-ELLAEAENAM--PDIQERTVVTGEVIQVSRDEAYVDI-GYKQEIAIPKRELAYPAPESAEDVVKVGDKIDVYIVSLGGDNGG-ILSKVKADRMVAWKDMEAIMERGETVQATINQVVKGGLVASVNGLRGFIPASQMELHF------------VKDLSVYAGQTVECEIIEIDVHKQRLVLSRRKLLEAVRAEKEDEVFSTLQPDTIVRGTVKRIVDYGAFIDI------------GGVDGLAHISDLAWNRVKHPSDVLEVG…
>non-CPR_non-CPR_Firmicutes_NC_015437
---------------------------------------------------------------------------------------------------------------------------MQE----QDM-K-SLLEAEEESM--QEVREHDVVKATVVAVDDGQAYVNIAGLKADIPISKRELASPEPDSAKDVVKVDDEIEVFVVSLGGENGA-TVSKVRADRMVAWKEIEALKEDGQTVQAQITQVVKGGLVASVSGLRGFIPASQMELHF------------VKDLSIYVGQTVEALPIEIDIRKQRLVLSRRSLLEEEREKKQEEVFSKLEVGQIIRGTVKRLVEYGAFIDI------------GGVDGLAHISDLAWHRVKQPSDVLSVG…
>non-CPR_non-CPR_Firmicutes_NC_019897
---------------------------------------------------------------------------------------------------------------------------MSETKN-TQAETTITEQNL-DQM--VTLKKGDIVKGTVIKIEDNQAYVSL-GYKYDGVIPLRELSAVQLDNAADAVQVGQELELKVISIDDDKERLVLSKRQVDAGKAWDRLQEQFEKGEVLEVTVADVVKGGLVVDV-GVRGFIPASMVERHY------------VEDFSSYKGQTLRVKIKELDRETNKVILSAKEVLEEEYEANKRRIMESLEPGQIIEGTVQRLTPFGAFVDI------------GGIDGLVHVSELAWEHVAHPRDVVSEG…
>non-CPR_non-CPR_Firmicutes_NZ_CP013023
---------------------------------------------------------------------------------------------------------------------------MSENNN----QEVTNQEAL-DQM--VSVNKGDTVTGTIVKIDDNQAYVSI-GYKYDGVIPVRELSSVHVDSASEAVEVGQEVECKVVSINDEKETLVLSKRAIDSENAWESLEQRFESGEVFEVTVSDVVKGGLVADV-GARGFIPASMVERHF------------VEDFSDYKGRTLRVKVKELDRENNKVILSQKDVLEAEYESNKHKIMESLQEGQELTGTVQRLTQFGAFVDV------------GGVDGLVHVSEIAWTHVDKPADVLSEG…
>non-CPR_non-CPR_Firmicutes_NZ_CP014167
---------------------------------------------------------------------------------------------------------------------------MSEFKD----QEATNQDEL-EQI--VSLKKGDTVKGTIVKVEDNQAYVSL-GYKYDGIIPIRELSSVHLDSANDVVQVGQEVEAKVVSINDEKESLVLSKRAIDSENAWDDLQAKFDSNETFEVVVADVVKGGIVANV-GVRGFIPASMVERHF------------VEDFSDYKGRTLRVKVKELDRENNKVILSQKDVLDEEFEANKLKVMAELQEGSVIEGTVQRLTQFGAFVDV------------GGVDGLVHVSEIAWNHVDKPADVLSEG…
>non-CPR_non-CPR_Firmicutes_NZ_CP009428
---------------------------------------------------------------------------------------------------------------------------MTENGA----EEEVTNQAD-LEI--ISLKKGDTVKGTIVKIEDNQAYVSI-GYKYDGVIPIRELSAVQLDNASAAVEVGQEVECKVVSINDNKESLVLSKRAVDSEKSWEDLEKYFASQEAFEVTVADVVKGGLVADV-GARGFIPASMVERHF------------VEDFSDYKGRTLRVKVKELDRENSKVILSAKEVLEEEFEANKLKIMAELSEGQIIEGTVQRLTQFGAFVDV------------GGVDGLVHVSEIAWSHVEKPSDVVSEG…
>non-CPR_non-CPR_Firmicutes_NC_014622
---------------------------------------------------------------------------------------------------------------------------MSEIKN----QEAANQDEL-DQI--VSLKKGDTVKGTIVKLEDNQAVVSI-GYKYDGVIPIRELSS-GLDNAEEAVQVGQEVEARIISIDDGKEKLVLSKRAIDSENAWEKLEQLFESKEVFEVVVNDVVKGGIVVDV-GLRGFIPASMVERHF------------VEDFSDYKGRTLRVVVKELDRENNKVILSQKDVLEAEFEANKLKVMAELKEGQEIVGTVQRLTQFGAFVDV------------GGVDGLVHVSEIAWTHVDKPSDAVSEG…
>non-CPR_non-CPR_Firmicutes_NZ_CP011388
---------------------------------------------------------------------------------------------------------------------------MTETKVENTTEE-MTEQQM-TDM--VSLKKGDTVKGTIVKIEDNQAYVDI-SYKYDGVIPVKELTSLGGDNAADHVEIGQEVECRVVSINDNKEQLILSKRAVDSENAWEDLQAKLDSQEVLEVTVADVVKGGLVVDL-GTRAFVPASMVERRF------------VEDFSDYKGRTLRVVVKELDRENKKVILSQKDVLDREFETNKKQAMENLQVGQVLEGTIQRLTQFGAFVDI------------GGVDGLVHISELSWTHVEKASDVVKEG…
>non-CPR_non-CPR_Firmicutes_NZ_CP011058
---------------------------------------------------------------------------------------------------------------------------MEQTE---AAAETISQDAL-ENI--VSIKKGDIVTGTIVKIEDNQATVSL-GYKYDGVIPLRELSSVQHDNASELVEIGQEVQLKVVSIDDEKEKLVLSKRQIDSEKAWDSLQSKFENGETLDVIVADVVKGGLVVDL-GVRGFIPASMVERHF------------VEDFSDYKGRTITVKIKELDRENNKVILSAKEVLEEQFEKNKQAIMAALEPGQEIEGTVQRLTPFGAFVDI------------GGIDGLVHVSEMSYQHVAHPKDVVSEG…
>non-CPR_non-CPR_Firmicutes_NZ_CP019687
---------------------------------------------------------------------------------------------------------------------------MSEMKS----QEQEAQEAM-SQV--ATLKKGDIVKGKIVKVEQDQAFVDI-GYKYDGIIPVRELSSVQVDTADKAVEVGQEVEAKVVTIDDNKEKLVLSKRAVDSEKAWEVLQENMENRVIMEAVVAEVVKGGLVVDV-GVRGFIPASMVERQF------------VEDFSDYKGRTLRMRVKELDREKNKVILSQKDVLDEEYEAKKKEILNSIEVGQVFEGTVQRLTQFGAFVDI------------GGLDGLVHISEMAWHHVDHPSEVVKEG…
>non-CPR_non-CPR_Firmicutes_NC_016935
---------------------------------------------------------------------------------------------------------------------------MSEIKD----QEVSQEESM-ADV--TFIKKGDIVKGKVIKVDADQAFVDV-GYKYDGVVPVKELSSVQVDDASQNVEIGQEIELKVLTIDDHREKLVLSKRAVDGEKSWDKLAADMENKTILEAKVAEVVKGGLVVDV-GLRGFVPASMVERTF------------VEDFSDYKGRTLRLRVKEMDREKNKVILSQKDVLDEEFEGKKKEVLAKLSVGQVLDGTVQRLTQFGAFVDI------------GGVDGLVHISEMAWHHVEKPSEVVKEG…
>non-CPR_non-CPR_Firmicutes_NZ_CP007806
---------------------------------------------------------------------------------------------------------------------------MVD---------TDNNVSL-TDV--QTLSVGDIVKAKVTKVEEKQVLVDV-GYKYDGLIPISELSGLHVEKTSDIVSEGDEFTVKVTKLNEEKEELVVSKKAVDAQIAWEELAKKQQNNETIEAEVKDVVKGGLVVDV-GLRGFIPASMVERHF------------VEDFSDYKGRTLTLKVMELDQEKNKVILSHKAVLEEEAKASKGKVLDRIEAGNILEGTVQRLTDFGVFVDI------------GGVDGLVHVSELAWEHVDKPADVVKEG…
>non-CPR_non-CPR_Firmicutes_NC_012491
---------------------------------------------------------------------------------------------------------------------------MME----------ETNVSL-TDA--TTISVGDVVKATVTKVEDKQALVDL-GYKYDGLIPISELSPLHVEKVSDVVAVGDTFEVKVIKLNDEKEELVVSKKAVAMESSWSDLEQKMQAGEIIEAAVKEVVKGGLVVDV-GVRGFIPASMVERHF------------VEDFSDYKGKTLALKVVEMDKEKNKVILSHKAVLEDEVKVQKQSIMDKIQVGQVLEGTVQRMTDFGVFVDI------------GGVDGLVHVSELAWNRVDKPSDVVKEG…
>non-CPR_non-CPR_Firmicutes_NC_018704
---------------------------------------------------------------------------------------------------------------------------M-D----------EMNKEV-SEL--KDFSVGQEVTGKVVKVEDNQVLVDI-GWKTDGIVPLNELTHLHVESASEVVNLDDELTLKINKI--TDDEVILSKQAVDTEKAWADLENKLASGEVFEATVKEIVKGGLVVDV-GVRGFVPASLVEVHY------------VEDFSTYLDTELTLKVVELDRSKNRVILSHRAVVEEESEKLKEQRLASLEEGQVVEGKVARITDFGAFIDL------------GGIDGLVHISELAHEHVNHASDVISEG…
>non-CPR_non-CPR_Firmicutes_NZ_CP013862
-----------------------------------------------------------------------------------------------------------------------------------------MSESS-NEL--TQLNIGDIVTGTAIKVEDKQVLVDI-GYKTEGIVPIGELSSLHIEKAGDVVQEGDTFKLYVKKM-DDDDEVILSKKAVDAEEAWGNLEEKYENGEVFETEIKEIVKGGLVADV-GVRGFIPASLVETYY------------VEDFSDYINHSLSVKIVDLDKEQNRIILSHKDVVQDELNAQKQEVLESLEEGQVLEGTVQRLTNFGVFVDL------------GGIDGLVHISQLAHEHVEKASDVVAKG…
>non-CPR_non-CPR_Firmicutes_NZ_CP013862_2
---------------------------------------------------------------------------------------------------------------------------M----------E-EL-N---E-------N----------------VMIE--G-----------------------F-------------D-A---KMVDQEQDHSMENWMTIYGAYQNSKILYASISGIEKVGAVVRVGSIRGLIPLEFTGAEN------------LRHLRAMTGQDIAFMVLNYDQENGLFTGSRTKALE----KMADITLRKIEEGDVIPAVIRHVGDDYMLGDI------------GGIQIFLPISEIRFGWIDDLHEEFKEG…
>non-CPR_non-CPR_Firmicutes_NZ_CP022437
-----------------------------------------------------------------------------------------------------------------------------------------MSDSG-NEM--MEINVGDTVTGTVVKVEDKQVLVDI-SYKTEGIVPIGELSNLHIDVSSDIINVGDQLTLMVKKV--EDDDIILSKKAVDSDKAWVELEEKYKNDEIFTTEIKEVVKGGLVVDV-GLRGFIPASLVETYY------------VDDFSDYINKPLSVKIVDIDREQNRVILSHRAVVEEESAAQKQDILQSLEEGQVLEGTVQRMTNFGVFVDI------------GGIDGLVHISQLSHQHVEKASDVVSEG…
>non-CPR_non-CPR_Firmicutes_NZ_CP017962
-----------------------------------------------------------------------------------------------------------------------------------------MSEQK-NEL--TEVREGETLTGTVIKVEDKQVLVDI-GYKTEGIVPISELSNLHVETAGDVVQEGDQLTLMVKKVNEEEDEVVLSKKAVEADKAWEELERKYDNKEKFETEVKEVVKGGLVVDV-GVRGFIPASLVETYF------------VEDFSDYLNKTLEVKVADLDREQNRVILSHRAIAEEEKEEKKNEILNNLEEGQVLEGTVQRITSFGVFVDL------------GGVDGLVHISQLAHEHVDNASDVVSEG…
>non-CPR_non-CPR_Firmicutes_NC_004193
-----------------------------------------------------------------------------------------------------------------------------------------MSEES-KDL--QTMEVGTTVTGTVVKLEDKQVLVDI-GYKTEGILPIGELSSLHVEATTDVLTEGDTVTLKVKKI--DDDEIILSKRAIDSETAWEELEQKYNSGEAFDTTVKEVVKGGLVVDV-GVRGFIPASLVETYY------------VEDFSDYLNKTLKVKIADLDRSQNRVILSHRAIVEDEEKNRKNDVLQSLEPGQVIEGTVQRITNFGAFVDL------------GGVDGLVHISQLAHEHVEKTSDVVSEG…
>non-CPR_non-CPR_Firmicutes_NZ_CP020772
---------------------------------------------------------------------------------------------------------------------------M-D----------EMNQEV-SGM--KEFSAGDIVTGKVVKIEEKQVLVDV-GYKVEGIVPISELSSLHVEKASDAVSEGDELTLQVKKV--EDDEIVLSKRAVDADKAWQDLEEKFESGEIFEAEVKDVVKGGLVVDI-GLRGFIPASLVETYY------------VEDFEDYKGKNLSLKVVELDREQNRVILSHRAVVEQEEAAKKQEVLHSLEEGQVIEGTVQRLTDFGAFVNL------------GGIDGLVHISQLSHQHVEKASDVVEEG…
>non-CPR_non-CPR_Firmicutes_NZ_CP008876
---------------------------------------------------------------------------------------------------------------------------M-D----------EMNEQA-TDF--KELSVGDTVTGKVVKVEDKQALVDI-GYKVEGILPISELSSLHVERAADAVSEGEELTLKVKKV--DDEEVVLSKRAVTAELAWDDLEAKFESGEIFEAEVKEVVKGGLVVDV-GLRGFIPASLVETYF------------VEEFEGYKGKPLTLKVVELDREQNRVILSHRAVAEEEEASKKQEVLDSLEAGQVIDGTVQRLTDFGVFVSIG-----------GGIDGLVHISQLSHEHVEKASDVVTEG…
>non-CPR_non-CPR_Firmicutes_NZ_CP014609
---------------------------------------------------------------------------------------------------------------------------MSE----------EMNL---GSN--QKFQEGDIVKGVAEQVEEKSVTVSVEGAPFDGIIPISELSSLHIEKASDIVSVGDQLELMITKV--EEENFVLSKRKVDALHAWDDLKAKFESGEVFEAEVKDVVKGGLVVDL-GVRGFVPASLVEDYF------------VEDFEDYKGKTLRLKITELDKEKGRLILSHRAVLDEEKASKKQQVIQNIHQGDMLEGTVQRLAKFGAFIDL------------GGIDGLVHISQVAHEHVEDISTVLQEG…
>non-CPR_non-CPR_Firmicutes_NZ_CP010820
---------------------------------------------------------------------------------------------------------------------------MSE----------EMNY---AE---QTFNEGDIVKGIAAQVDEKAVSVSIPGAPFDGIVPISELSSLHIEKASDVISVGDELDLMITKV--EEENFVLSKRKVDALKAWDTLEQQFTAGEIFEAEVKDIVKGGLVVDL-GVRGFVPASLVEDYF------------VDDFEGYKGKTLSFKIVELDKEKNRLILSHRAVVESEKASQKQNVINQIKAGDVLDGKVQRLASFGAFIDL------------GGIDGLVHISQVSHEHVSDVSEVLSEG…
>non-CPR_non-CPR_Firmicutes_NZ_CP009416
---------------------------------------------------------------------------------------------------------------------------MTE----------DMNN---IEV--NSLEVGDRVTGTVTKVEEKQVLVDVKDSKIDGIIPISELSSLHVEKASDVVKEGDELDLVVTKV--EEELLVLSKRKVEAEKAWEEMKRRYETEEVFEAEVKDVVKGGLVVDL-GVRGFVPASLVEDYY------------VEDFEDYRDKSLTFKIVELDEEKNRLILSHRAVIEGEKAEKKKELLEKIQADDVLDGTVQRITDFGAFVDI------------GGVDGLVHISQLSHQHVEKPSDVVEEG…
>non-CPR_non-CPR_Firmicutes_NZ_CP014806
---------------------------------------------------------------------------------------------------------------------------MSE----------EMNL---NEV--NEIREGDVVKGKVERVEDKVAIVTIAGAPFDGVVPISELSSLHVEKASDAVSVNDELELIVTKV--EEGQYVLSKRKVDAKKAWKVLEEQFNNGEIIEAEVKDVVKGGLVVDL-GVRGFVPASLVEDHF------------VESFDDYKGKTLTFKIVEMEEEKNRLILSHRAVLEAQKAEKKGEVLGGIHEGDVLEGTVQRLASFGAFVDL------------GGVDGLVHISQVSHEHIDDVASVLSEG…
>non-CPR_non-CPR_Firmicutes_NZ_CP017560
---------------------------------------------------------------------------------------------------------------------------MSE----------DINI---EMQ--KEFNEGDRVTGKVVKIEDKSVTVEIPGAPFDGVIPISEISSLHIEKASDVVSEGAELELAIIKI--EEANYVLSKRRIDADNAWDSLEEKFNNNEIIETEVKDVVKGGLVVDL-GVRGFIPASLVEDFF------------VESFDEYKGRQMKFKIIEMDKEKNRLILSHRAVIQEEKAAKKNEVLANLKEGQVLEGTVQRLASFGAFVDI------------GGVDGLVHISQLSHAHVEKVSDVLSEG…
>non-CPR_non-CPR_Firmicutes_NZ_CP014616
---------------------------------------------------------------------------------------------------------------------------MTE----------DMNL---EAA--NIYNEGDRVTGKVTKIEEKSVTVEIAGAPFDGVIPISELSSLHIEKAEDAVAEGDEIELIITKV--EEDNYVLSKRKVDAEDAWGSLEEKFNNKETIETEVKDVVKGGLVVDL-GVRGFIPASLVEDYF------------VETFEEYKGRMMTFKIVEMDKEKNRLILSHRAVIQEEKASQKGEVLDNLKEGEVLEGTVQRLATFGAFIDI------------GGIDGLVHISQLSHDHIEKVSDVLKEG…
>non-CPR_non-CPR_Firmicutes_NZ_CP015109
---------------------------------------------------------------------------------------------------------------------------MTE----------EMNM---DEV--KEYGEGAHVTGVVTKVEEKSVTVEIAGAPFDGVIPISELSSLHIEKAADAVSVGDELELAITKV--EDEAYVLSKRQVDAENAWDSLEEKFESGEIIETEVKDVVKGGLVVDL-GVRGFIPASLVEDHF------------VESFDDYKGRTMTFKIVEMDKEKNRLILSHRAVVQAQNEQKKEAALSEIQEGDILDGTVQRIASFGAFVDI------------GGVDGLVHISQISHGHIESVSDVLKEG…
>non-CPR_non-CPR_Firmicutes_NZ_CP013659
---------------------------------------------------------------------------------------------------------------------------MSE----------DMNL---MEN--RDFQTGDRVKGIVAKIEEKAVTVTIDGAPFDGIIPISELSSLHIEKASDSVQEGDELELIITKV--EDENFVLSKRKVDAESAWDDLEKKFESGEIIEAEVKDVVKGGLVIDL-GVRGFVPASLVEDYF------------VESFEDYKGRVMTFKIVEMEKENNRLILSHRAVVEGEKESKKEQVMDSINAGDVLDGKVQRIASFGAFVDI------------GGVDGLVHISQLSHEHVDKVSDVVTEG…
>non-CPR_non-CPR_Firmicutes_NZ_CP012024
---------------------------------------------------------------------------------------------------------------------------MTE----------DLNS---LEI--SPLNVGDKVKGTVIKVEDKQVQVEIENSKKDGIIPISELSSLHIEKASDAVNVGDTLELVITKE--EDDLYVLSKRKVDAEKAWDLMRKRFENGEIFEAEVKEVVKGGLVVDL-GVRGFVPASLVEDYY------------VEDFEDYKGKTLTFKIVELDEEKNRLILSHRAVVEEEKQKAKKKLLDEIQPGDVLEGKVQRLTDFGAFVDI------------GGVDGLVHISQLSHEHVEKPSDVVKEG…
>non-CPR_non-CPR_Firmicutes_NZ_CP007739
---------------------------------------------------------------------------------------------------------------------------MSE----------DMNQ---VEV--TNFQVGDKVKGKVIKVEEKHVLASVENSKLDGIIPISELSSLHVEKAEDVVTVGDELELEVIKV--EEEALILSKRKIDAEKAWDDLEKKFESGEIFEAEVKDVVKGGLVVDL-GVRGFVPASLVEDHF------------VEDFSDYKGKPLTFKIVELDKEKNRLILSHRAVVEEEKIRQKQSLLESLQPGQVLEGTIQRITDFGAFVDI------------GGVDGLVHISQLSHQHVEKPSDVVEEG…
>non-CPR_non-CPR_Firmicutes_NZ_CP016020
---------------------------------------------------------------------------------------------------------------------------MVE----------ELNN---VHV--ETPEVGDLVKGFVTKVEEKQVIVEIENCKHTGIIPISELSSLHVEKASDVTKENDELDLKVLKV--EDEALVLSKRAVDAEKAWDDLQSKYESKEVFEAEVKDVVKGGLVVDI-GVRGFIPASLVEAHF------------VEDFSEYMNKTLSLIVVELDRDKNRVILSHRAVIEKEQSEKKSSLLESVTVGSTIVGTVQRLTDFGAFVDI------------GGVDGLVHISQLSHNHIEKPSDVVQEG…
>non-CPR_non-CPR_Firmicutes_NZ_CP011008
---------------------------------------------------------------------------------------------------------------------------MTE----------DMNQ---VEV--NNYKVGDQVKGTVSKVEEKQVIVDCENSKTDGIIPISELSSLHVEKASDAVSVGDVLELEIIKV--EEEALILSKRKIDALKAWDDLELKFENGDVFEAEVKDVVKGGLVVDL-GVRGFVPASLVEDYF------------VEDFSDYKNKTLTFKIVELEKDKNRLILSHRAVVQDQKEKQKANVLDKIESGQVLEGVVQRITDFGAFVDI------------GGVDGLVHISQLSHQHVEKASDVVSEG…
>non-CPR_non-CPR_Firmicutes_NZ_CP020880
---------------------------------------------------------------------------------------------------------------------------MVE----------DMNQ---VEV--NNLEVGNTVTGTVTKVEEKQVLVSIEGSKLDGIIPISELSSLHVEKATDVVSEGQELQLKVTKV--EEELLVLSKKAVDADLAWEDLQKKFESKEVFEAEIKDVVKGGLVVDL-GVRGFVPASLVENYF------------VDDFSDYKGKTLTFKVVELEKEKNRVILSHRAVVEEEMQNKKHQLLDTIQTGQVLEGTVQRITDFGAFVDI------------GGVDGLVHISQLSYEHVGKPSDVVTEG…
>non-CPR_non-CPR_Firmicutes_NZ_CP016790
---------------------------------------------------------------------------------------------------------------------------MVE----------DMNQ---VEV--KALEVGETVTGTVTKVEDKQVLVEVANSKLDGVIPISELSSLHIEKASDVIKEGTEIQAKVIKV--EEELLVLSKKAVDAEKAWDDLEEKLSTGEVFEAVVKEVVKGGLVADI-GVRGFIPASLVEAHF------------VDDFASYQDQTLTVKVVELDREKNRIILSHRAVVEEENAQKKQTALSSLAEGQVLEGTVQRLTDFGAFVDV------------GGVDGLVHISQLSHERVEKPSDVVKEG…
>non-CPR_non-CPR_Firmicutes_NC_000964
---------------------------------------------------------------------------------------------------------------------------MTE----------EMNQ---IDV--QVPEVGDVVKGIVTKVEDKHVDVEIINVKQSGIIPISELSSLHVEKASDVVKVDDELDLKVTKV--EDDALILSKRAVDADRAWEDLEKKFETKEVFEAEVKDVVKGGLVVDI-GVRGFIPASLVEAHF------------VEDFTDYKGKTLSLLVVELDRDKNRVILSHRAVVESEQANKKQELLQSLEVGSVLDGKVQRLTDFGAFVDI------------GGIDGLVHISQLSHSHVEKPSDVVEEG…
>non-CPR_non-CPR_Firmicutes_NC_003997
---------------------------------------------------------------------------------------------------------------------------MVE----------KMNEEV-MDS--KELQVGDVVTGSVTKVEEKQVLVNV-GYKTDGVIPISELANVHIEKASDVVELDQTLELKVIKL--EENDLVLSKRAVDAEKAWVELQEKFNSGHVFDVTVKDIVNGGLVVDL-GVRGFIPASLVEVHY------------VEDFTDYKGKTLAVKIVELDREKNRVILSHKAVVELELDSKKKEAISSLKEGDVVEGTVQRLTDFGAFVNV------------GGVDGLVHISQISHERVEQPSEVLEQG…
>non-CPR_non-CPR_Firmicutes_NZ_CP020814
---------------------------------------------------------------------------------------------------------------------------MVE----------EMNNEV-TKM--KSFAVGEIVTGKVTKVEDKQAFVDV-GFKVDGIVPISELSSLHVEKVSDVLSVDDELELKVLKS--EDDELILSKRAVQAEKAWDELQKAFESGDILEAEVADVVKGGLVVDV-GVRGFIPASLVERHF------------VEDFSDYKGKTLRLKVTEIDKANNKLILSQRAVLDQEVENKKKSVLKSLKAGDVVEGKVQRLTDFGAFIDV------------GGVDGLVHISQLAHHRVEKTSDVVKEG…
>non-CPR_non-CPR_Firmicutes_NC_006582
---------------------------------------------------------------------------------------------------------------------------MVE----------EMNDGM-DEI--KSFSVGDIVTGKVTKVEDKQAFVDV-GFKVDGIVPISELSSLHVEKASDVLSVDDELELKVTKV--EDDELILSKKAVQAEKAWEQLEEAYEKGEVIEAEVAEVVKGGLVVDV-GVRGFIPASLVERHY------------VEDFSDYKGKPLRLKVTEIDKDNNKLILSQRAVLDAEIEEKKKQVLHSLSTGDVVEGKVQRLTSFGAFVDV------------GGVDGLVHISQIAHERVEHPSDVLSEG…
>non-CPR_non-CPR_Firmicutes_NZ_CP009709
---------------------------------------------------------------------------------------------------------------------------MPD----------EMNE---IEV--RSLSVGDKVKASVVKVEEKQVLVSIEGSKVDGIIPISELSNLHIETASDAVKEGDELNLVVTKV--EEDAVILSKRKYDAEKAWDELKEKFENQEIIEAEVNEVVKGGLVVDL-GVRGFVPASLVEDHF------------VEDFSDYKGKTLPFLIVELDEDKNRLILSHRAVVEKEKEEKRQDILDHLEAGQVLEGTVQRLTNFGAFVDI------------GGIDGLVHISQLAHERVETPSDVVKEG…
>non-CPR_non-CPR_Firmicutes_NZ_CP015378
---------------------------------------------------------------------------------------------------------------------------MTD----------EMSTSL-TNA--SMAEKGEIIKGTVLKVEDKHALVDI-SAKQDAFLPINEVSSLFIEKVSDVLNEGDQITVKVLSH--TEDKLLVSKKAVDTEKSWSELEEKFDSKETFEVVVHDVVKGGLVVDL-GVRAFIPASMVESHF------------VEDFSDYKGKSLSVKIVELDAEKGRVILSHRAVTEEAAVAKKQEILDRLAPGEIIEGKVQRLTDFGAFVDI------------GGVDGLVHVSQLSHNRVDNPSEVLSEG…
>non-CPR_non-CPR_Firmicutes_NC_003210
---------------------------------------------------------------------------------------------------------------------------MSE----------DLFD---VEV--RNFEEGDKVTGTVTSVEDKQVYVGIPGSKLDGVVPISELSNIHVETASDVVSVGDTLDLIVTKV--EDDILVLSKRKVDAEKASDDIKAKFESGEVFEAVVSDVVKGGLVVDL-GVRAFVPASLVEDHF------------VEDFADYKGTTLTFKVVEFEPENNRVILSHRAVVETEKASQKQALLSEIKEGDVIEGTVQRLANFGAFVDI------------GGVDGLVHISQISYKHIATPQEVLEEG…
>non-CPR_non-CPR_Firmicutes_NZ_CP014335
---------------------------------------------------------------------------------------------------------------------------MTE----------EMN----VQV--NVYEVGDIVRGKVVKLEDKQVLVEVENSKQSGIIPISELSNLHIEKPSDAVAVGDEVTAKVKKVDGEEGLLILSKRAVDAERAWEDLERKFASGETFETVIKDIVKGGLVADV-GVRGFIPASLVEPHY------------VEDFSDYKGKTLAVKVVELDREKNRVILSHRAVVEEEQARQQKELLSRLEPGQVLDGVVRRIADFGVFVDV------------GGFDGLVHISQLSHTRVAHPSEVVKEG…
>non-CPR_non-CPR_Firmicutes_NZ_CP012712
---------------------------------------------------------------------------------------------------------------------------MTE----------DMN----LQV--NVYKVGDIVRGKVAKLEDKQVLVDIEGSKQSGIIPISELSSLHIDKTSDAVSVGDEVTAKVKKVNEEDGLLILSKKAVDAERAWEELERRFASGETFEVIVKDIVKGGLVADV-GVRGFIPASLVEPHY------------VEDFSDYKGKPLAVKVVELDREKNRVILSHRAVVEEEQERQRKEALSRLETGQVLEGIVRRITDFGVFVDV------------GGFDGLVHISQLSHTRVAHPSDVVQEG…
>non-CPR_non-CPR_Firmicutes_NZ_CP012152
---------------------------------------------------------------------------------------------------------------------------M-E----------EMNQ---VDV--RVYEVGDTVKGQVTKVEDKQVLIDVEGSKLVGIIPISELSSLHIEKASDVLSVGDAVVAKVKKV--EDEALILSKKAADAEQAWEVLEQKLASGETFDVVVKDIVKGGLVADV-GVRAFIPASLVEKDF------------VEDFSDYKGRTLTVKVVELDREKNRVVLSHRAVVEEEEAAKKKATLQSIQVGQVLEGTVVRMTNFGVFVNI------------GEVDGLVHISQLAHTRVDHPSDVVKEG…
>non-CPR_non-CPR_Firmicutes_NZ_CP022046
---------------------------------------------------------------------------------------------------------------------------MTE----------EFNE---SMI--NEVQEGDKVKGTVQQVEDKHVVVHIVGGKFDGIIPISQLSTQHIETANEVVNIGDEIEAFVTKITDESGHYILSKRKLDENLSYEKLQKILEDDDTIEAEVTEVVKGGLVVDA-GIRGFIPASLISVNY------------IDDFSDYLGKVLTLKVEELDQTNNRVILSHKKVEQEALSSKKEDLLNNISQGDVLEGTIARIANFGAFIDL------------GGVDGLVHVSELSHDHVKSPDEVVKVG…
>non-CPR_non-CPR_Firmicutes_NC_004461
---------------------------------------------------------------------------------------------------------------------------M----------------------------------------------------------------------------------------------------------------------------------------------------------------------------------------------------------------------------------------------------------------------EHVQTPEEVVSVG…
>non-CPR_non-CPR_Firmicutes_NC_007795
---------------------------------------------------------------------------------------------------------------------------MTE----------EFNE---SMI--NDIKEGDKVTGEVQQVEDKQVVVHINGGKFNGIIPISQLSTHHIDSPSEVVKEGDEVEAYVTKVENETGAYILSRRQLETEKSYSYLQEKLDNNEIIEAKVTEVVKGGLVVDV-GQRGFVPASLISTDF------------IEDFSVFDGQTIRIKVEELDPENNRVILSRKAVEQEENDAKKDQLLQSLNEGDVIDGKVARLTQFGAFIDI------------GGVDGLVHVSELSHEHVQTPEEVVSIG…
>non-CPR_non-CPR_Firmicutes_NZ_CP022096
---------------------------------------------------------------------------------------------------------------------------MTE----------EFNE---SMI--TDIKEGDKVTAEVQEIEDKQVIVHVNGGKFNGIIPISQLSTHRIDDPKEAVKVGDEIGAYVTKIENETGAYILSKRQLETEKSYEFLQEKLDNNETIEAEVTEVVKGGLVVDV-GQRGFVPASLISTEY------------IEDFSDYEGQTLKLKVEELDPANNRVILSHKAVEELENAEKKEKLFDSLQEGDVIDGKIARLTNFGAFVDI------------GGVDGLVHVSELSHEHVEKPEDAVSIG…
>non-CPR_non-CPR_Firmicutes_NZ_CP008747
---------------------------------------------------------------------------------------------------------------------------MTE----------EFNE---SMI--KDIKEGDKVTGEVQQIEDKHVVVHVNGGKYNGIIPISQLSTHHIDNANEVVKVGDEIGAYVTKIENDTGSYILSKRQLEEEKSYEFLQEKLDNNETIEAKVTEVVKGGLVVDV-GQRGFIPASLISTDF------------IEDFSDYEGKVLELKVEELDPSNNRVILSRKAVEAEENTKKKEELLKSIKAGDVIEGKVARLTNFGAFIDL------------GGVDGLVHVSELSHEHVKSPEEVVSIG…
>non-CPR_non-CPR_Firmicutes_NZ_CP014016
---------------------------------------------------------------------------------------------------------------------------MTE----------EFNE---SMI--NEIKEGDKISGQVQKVEEKQVIVDVDGGKFSGIVPISQLSTHHIDSPNEVVKEGDAVEAYVTKVENETGAYILSIRQLEQEKSYQYLQEKQENNEIIEAKVTEVVKGGLVVDV-GQRGFVPASLISTDF------------IEDFSSFDGQVLELRVEELDPENNRVILSRKAVEQERNEAKKAELLESLNEGDVIEGTIARLTNFGAFVDI------------GGVDGLVHVSELSHEHVDKPEDVVSVG…
>non-CPR_non-CPR_Firmicutes_NZ_CP021059
---------------------------------------------------------------------------------------------------------------------------MTE----------EFNE---AMI--KEIQEGDKVKGTVQAIEEKHVVLNLDGAKYDGIIPISQLSSLHIENAEEVVQIGDEIEAYVTKIKEEDGHYILSKRKLDESESFESLKEKFENGETLEAEVKEAVKGGLVVDV-GLRGFIPASLISTNY------------IEDFSSYVGQVLTLKIEELDQEKNRVILNHKVIEAEENKVKKEQRLDEIEVGSVIEGEVLRITNFGAFVDI------------GEVDGLVHISQITHDHIDKVEDALSIG…
>non-CPR_non-CPR_Firmicutes_NC_014219
---------------------------------------------------------------------------------------------------------------------------MVE----------EMNNEM-ADF--NSLSVGDVTKGTVSKVEDKQAYVNV-GYKMDGVVPISELASLHVEKAGDVINEGEEYEFKVIKL--TEDELVLSRRAVAAEKTWENMAEKLESGEVFEAEVADVVKGGLVVDV-GVRGFIPASLVERFY------------VEDFSEYKGKTLRLKVVELDRERNKLILSQRAVLDEEALNQKKETLHSISAGEVVSGTVQRITSFGVFVDI------------GGVDGLVHISQLSHEHIETPSEVVSEG…
>non-CPR_non-CPR_Firmicutes_NC_014829
---------------------------------------------------------------------------------------------------------------------------MVE----------EMNNEM-ADV--KSFSVGETVIGTITKVEEKQAFVNV-GYKMDGIIPISELSSLHVEQVSDVLSEGDEVELQIIKS--TDDELILSKKEVIAEKAWNELEHKLSTSEIFEAVVADVVKGGLVVDV-GVRGFIPASLVERHF------------VEDFSDYKGKTLRLKVVEMDKEKNKLILSQRAVLDEEENEKKRKTLTSIQVGDVLEGKVQRLTDFGAFVDI------------GGVDGLVHISQMAHHHVDAPSEVVSEG…
>non-CPR_non-CPR_Firmicutes_NC_010556
---------------------------------------------------------------------------------------------------------------------------MVE----------EMKD---MPD--FEIHRDQVVTGTVVKIEDKQALIDI-GYKTEAILPISEVSSLHLDDIQGALKVGDELQVKVKKI--TDEEVVVSKREVDALQAWEKVEAKYASGEIFEVVVKDIVKGGLVVDI-GVRGFIPASLVERHY------------VEDFSDYIGRTIAVKVVELDQEKNRVILSHKAVVEGELNAKKKETLEHLEVGQVLEGTVQRLTDFGAFVDI------------GGVDGLVHISEMAHHRVERPSDIVTEG…
>non-CPR_non-CPR_Firmicutes_NZ_CP011366
---------------------------------------------------------------------------------------------------------------------------MTTIKNESSINENEVNEEV-SAS--PGFEVGETVKGTVYKIEDKFVKAHIDDSDFEGIVPISQLTSKRIERPEEIVSEDDSIEGVVIKVEDDRKNVILSIRKLEESNAYDSLQSAKDNDETITGTVMEVVKAGLVIDV-GVRGFIPASLLSDAY------------IEDLEQFDGQELEVKVEDIEPEKNRVILNRKRIVEAEKAVERKKQLETLDVGSIVEGEVVRITTFGAFINL------------GEVDGLAHISELSYSRVEKVEDAVNIG…
>non-CPR_non-CPR_Firmicutes_NZ_CP019573
---------------------------------------------------------------------------------------------------------------------------MT--------------E---DMI--DEVKVGDRVKGSVVKIEEKAVIVHIEGGKFDGIIPISQLSGLRIENAEEVVAVGDEIEAFVTKVDEEDGKYILSKRKVDELSSFEDLQKKKDNDEIITAEVKEVVKGGLVVDV-GLRGFIPASLISNEY------------VEDFSDFEGQTIEMKVEELDAEQNRVILSRKAIMESKALEEKQAVLDKLEEGQVVTGTIARLTNFGAFIDL------------GGVDGLVHVSQIAHHHVEKPEDELTIG…
>non-CPR_non-CPR_Firmicutes_NC_019425
---------------------------------------------------------------------------------------------------------------------------MTE-----NVENETMMDAM-NSV--QDVNIGDIVQGEILTIQDKQAIVGIVGGGVEGVIPFNELSSTPFENVTDVVNVGDVVDLVVIKPDKENGSFLLSKRRIDAKKVWEGIQKDFEAGTIIQAPVTDVVKGGLVVDV-GIRGFVPASMVDAHF------------VDDFSVYKGQTLGFKIVEIEPSENRLILSHKAVVEAEKEVAKKEIMTKLVEGDTVTGTVARLTNFGAFIDL------------GGVDGLVHISQISYNHVKAPGDVLTVG…
>non-CPR_non-CPR_Firmicutes_NZ_CP019728
M---------LSR-------KC----------------------------------------------------------------------------------------H------------MSELEEE-TTENMTMDDML-DAY--PPLEVGDTVQAEILAIEDNQAIVGIKDRGVEGVIPYKELAAKPFDEVTEIVNVGDVVDVVVIKQDKENGSYLLSKRRVDAKAVWEEIQEKYDNEEYIEAPVKDVVKGGLVVDV-GVRGFVPASMVEAFF------------VEDFSEYKGKTMKFKIIELEPSENRLILSHKAIALAEKAAKSVELMAEISEGDIIEGTVARLTNFGAFIDL------------GGVDGLVHISQIAHEHIKSPGDVLTIG…
>non-CPR_non-CPR_Firmicutes_NC_018081
---------------------------------------------------------------------------------------------------------------------------MTEFEQ--QTENQSMEDAM-NSV--QEVNVGDVVSGEVLVIEDKQVVVGIEGAGVEGVVPAKELSTSPVEDINEVVKVGDTLELVVISTDKENGSYLLSKRRLDAKKVWEDIEKDFQAGNIIEAPVTNVVKGGLVVDV-GVRGFVPASMVEDHF------------VADFSEYKGETLAFKIVEIEPSENRLILSHKAVVETEKEEKKKEILANIHEGDVIDGRVARITDFGAFVDL------------GGIDGLVHVSEISHSHVAKPSDALAVG…
>non-CPR_non-CPR_Firmicutes_NC_020995
---------------------------------------------------------------------------------------------------------------------------MTEFEN--QVEGESMEAAL-DNF--QEVKVGDIVKGEVLAIEDKQAIVGIEGAGVEGVVPAKELSTLPVEDINEAVKVGDVLELVVISADKENGSYLLSKRRLDAKKVWEDIEKDFQEGKIIEAPVTNVVKGGLVVDV-GVRGFVPASMVEDHF------------VADFEDYKGKTLTFKIVEIEPSENRLILSHKAVVEAEKAKQKEALLADLYEGQEVEGKVARLTDFGAFVDL------------GGIDGLVHVSEISHGHVGKPSDVLSVG…
>non-CPR_non-CPR_Firmicutes_NZ_CP006683
---------------------------------------------------------------------------------------------------------------------------MGDYKD--QEKEATMEEAI-NSV--QEVTIGDIVKGEVLAIEDKQIIVGIEGTGIEGIVPAKELSTSYVENINDFVKIGDKLDLVVISSDKENGNYLLSKRRLDAKKVWEEIEADFKEERIIEAPVTDIVKGGLVVDV-GVRGFVPASMVEDHF------------VSDFSEYKGKTLAVKIIEIEPSENRLILSHKAVVENDKAAKKVEIMDHLHAGDIVEGKIARLTDFGAFIDL------------GGIDGLVHVSEIAHNHVDKPSDTLTIG…
>non-CPR_non-CPR_Firmicutes_NZ_CP017267
---------------------------------------------------------------------------------------------------------------------------M----------SETMLDAI-ESV--QEVKVGDLVQGEILAVDDKQAVVGIIGAGVEGVIPLKELSTIPVENVTDVVSIGDVIDLVVISEDKENGSYLLSKRRLDARKVWQEIEDKFKAGEVIEGPVTDVVKGGLVVDV-GVRGFVPASMVSDHF------------ISDFSEFKGQTLTFKIIEIEPSENRLILSRRALLEAEKAKAKEEVFGKLVAGDVVTGKVARLTDFGAFVDL------------GGVDGLVHVSEISHAHVSKPSDILNSG…
>non-CPR_non-CPR_Firmicutes_NC_016052
---------------------------------------------------------------------------------------------------------------------------MTEFEN--NFENGTMEDAL-NAV--HDVKVGDIVKGEVLALEDRQAIIGIEGTGVEGVVPAKELSTLPVEDINEVVKVGDVLDLVVISSDKENGSYLLSKRRLDAKKVWEEIEEKYQNGETIEAPVTNVVKGGLVVDV-GVRGFVPASMVEDYF------------VDDFNEYKGKTLEFKIIEIEPSENRLILSHKAIVEEEKEQKKAELLASISEGDVIEGTVARLTDFGAFIDL------------GGIDGLVHVSEISHSHVGKPSDVLSVG…
>non-CPR_non-CPR_Firmicutes_NZ_CP014164
---------------------------------------------------------------------------------------------------------------------------MSNFEQN---NEPSMEEIL-AES--VEVKIGDTVTGEVLSIDDNQVIVGIEGAGVEGVIPFKELSAQPIDSIEEVAKVGDTLELVVIKQEKENGSFLLSRRRIEAKKVWAELEVKAENGEIITVPVKSVVKGGLVVDA-GVRGFIPASMVEDFF------------VDDFSPYKGQELEVKIVEIDPSENRLILSHKEIAAEKRIAERAEKLNSFQEGDKVTGTVARLANFGAFIDL------------GGIDGLVHISQIAQAHVNHPSDVLSEG…
>non-CPR_non-CPR_Firmicutes_NZ_CP014160
---------------------------------------------------------------------------------------------------------------------------MSNFEAQVEETEPSMEDVL-DQT--LDVKIGDTVNGEVLTIDENQLIVGIEGAGVEGVVPFREISSTPIDNVEDVVKVGDVIELVVVKQEKENGSFLLSRRRVEAKKIWKELEEKAENDETITVPVKKVVKGGLVVDA-GVRGFIPASMVEDHF------------VKDFTPYKDKELEVKIVEIDPAENRLILSHKEIAAEKAAAERAEKLEQFEAGQTVTGTVARLANFGAFIDL------------GGIDGLVHISQIAHHHVKHPSDVLTVG…
>non-CPR_non-CPR_Firmicutes_NZ_CP014163
---------------------------------------------------------------------------------------------------------------------------MSNFEEQ-EVNEPSMADLF-AET--KEVKIGDTVIGEVLTIDDDQVIVGIEGAGVEGVIPKRELSATPVDDISEIVKVGDKIELVVVKPEKENGSFLLSKRRVDAKKVWKELEEKAENNETITVPVKSVVKGGLVVDA-GVRGFIPASMVEDFF------------VEDFSKYKGQDLEVKIVEIDPNENRLILSHKEIAAEKRAAERAEKLEQFEDGQIVTGEVARLANFGAFVDL------------GGIDGLVHISQIAHHHVKHPSDELEVG…
>non-CPR_non-CPR_Firmicutes_NZ_CP014159
---------------------------------------------------------------------------------------------------------------------------MTNFENQ-EVEEPSMEDML-AET--KEVKIGDTVTGEVLAIDENQLVVGIEGAGVEGVVPFRELTSKQVEDVTEVANVGDKLELVVVKQDKENGTFLLSHRRLEAKKVWKELEEKAVNKEVLTVPVTKVVKGGLVVDA-GVRGFIPASMVENYF------------VRDFSAYKGKELDARIVEINPVENRLILSHKEIAAEQEEKARTEKLEQFEEGAVVEGTVARLANFGAFIDL------------GDIDGLVHISQIAHHHVNHPSDVLEVG…
>non-CPR_non-CPR_Firmicutes_NZ_CP014161
---------------------------------------------------------------------------------------------------------------------------MTNFEQQVEANEPSMEDML-AET--KEVKIGDTVTGEVLTIDENQLIVGIEGAGVEGVVPFRELSSSHVDDVTEIANVGDTLELVVVKHDKENGTFLLSRRRLEQKKVWKELEEKAENEETITVPVTKVVKGGLVVDA-GVRGFIPASMVEDHF------------VRDFTPYKGKELEVKIVEINPQENRLILSHKEIAREQAEAERAEKLAQFEEGEVVEGTVARLANFGAFVDL------------GGIDGLVHISQIAHHHVNHPSDELEVG…
>non-CPR_non-CPR_Firmicutes_NZ_CP019699
---------------------------------------------------------------------------------------------------------------------------MVE----------EMNAEV-NEV--KHFQRGDVVKGKVTKVEDKQAYVDV-GYKTDGIVPISELSSLHVETVSDVLKEGDEIELKVIRINDDEDELVLSKRAVDAERAWAELKEKMDRDDIVEAEVAEVVKGGLVVDL-GVRGFIPASLVERYY------------VEDFSDYKGRTLRMKIIELDEQKNKLILSQKAVLDEEAEAEKRKTLESLEVGQELEGTVQRLTDFGAFVDI------------GGVDGLVHISELAWHRVEKPSDVVNEG…
>non-CPR_non-CPR_Firmicutes_NZ_CP019699_2
---------------------------------------------------------------------------------------------------------------------------M-------------M------T----T-K--------------------V-------------------------LQETD-VTLKVVH-ESDE-----DVREQQLKEAWEKVYGARQNNSVLINPLSGIEQG-GVVMIDNIKGIIPLEHSGCEN------------ARQLSRLIGQDVYFKVTALDRESRQFAASIQAGVE----HVQGLTWDQLQEGMKVEARITDVYMKRMVLDI------------GAIPVTLPAEEVSHGWIDDLRGEFKRG…
>non-CPR_non-CPR_Firmicutes_NC_015759
---------------------------------------------------------------------------------------------------------------------------MNE--------ENELLAAL-DAQ--PDVKVGDVVTGEVLTIDDHQVVVGIDGAGVEGVIPARELTSDRDADVNDLVKVGDKIEAVVKMPEKEGYSWILSKRQLEARRAWEEIASKYNEDDIVEAPVTQVVKGGLVVDVAGVRGFIPASMIENRF------------VQDLNQYKGQTVKAQIIEINVAESRLILSRKAVLSAERSEALKRVFEELTVGDIVEGKVARMTNFGAFIDL------------GGVDGLVHVSEISYERVSQPSDVLSVG…
>non-CPR_non-CPR_Firmicutes_NZ_CP014332
---------------------------------------------------------------------------------------------------------------------------MNE--------ENELLAAL-DSV--AEVKVGDVVKGEVLAIDDRQVIVGIEGAGVEGVIPLRELTTDRDADVNDLVKVGDVLDLVVVSTDKEGGSYLLSKRRLEARRAWEEIASKHSVDDIVEAPVTQAVKGGLVVDVEGVRGFVPASMIENRF------------VQDLNQYKGQTIRAKIIEINAADSRLILSRREVLNEERSAALARIFDELSVGDVIEGKVARMTNFGAFIDL------------GGVDGLVHVSEISHERVSQPSDVLSVG…
>non-CPR_non-CPR_Firmicutes_NC_010471
---------------------------------------------------------------------------------------------------------------------------MSE--------TNEFLAALESAA--DQIKVGDVVTGELLAIDNNQAVVGL-STGEEGVVPAREYSDDRNINLADELKIGDSIEAVVISNDKEGVAYLLSKKRLDARKAWENLD--FAEGDTVDAKVVNAVRGGLIVMVNGVRGFVPASMVAERF------------VSDLNQFKNKDIKAQVIEIDAANARLILSRKAVAAQERAAQLAEVFSKLSVGEVVEGTVARLTDFGAFVDL------------GGVDGLVHVSEISHDRVKNPADVLTKG…
>non-CPR_non-CPR_Firmicutes_NC_016605
---------------------------------------------------------------------------------------------------------------------------MVE-----NVNQNDLLNAI-NSV--GDVQIGDVVTGEVLDIDDRQLIVGIQGAGVEGVVPLRELSNKHIDDINEVAKIGDELELVVISKDKEGGSYLLSKKRLEAQAIWKDIQAKEDNNETLEVPVTQVVKGGLVVDA-GVRGFIPASMIENRF------------VNNLSAYEGKTLKVKIIEIDATKNRLILSHKDVLNEERAAKREEVLNSIHEGDIVEGKVARLTNFGAFIDL------------GGMDGLVHISEISYERVNKPEDVLKVG…
>non-CPR_non-CPR_Firmicutes_NZ_CP015206
---------------------------------------------------------------------------------------------------------------------------MAE-----DVNQSDLLNAI-NSV--EEVKVGDVVTGEVLDIDDRQVIVGIQGAGVEGVVPLRELSTQHIDNINDEVKIGDELELVVISRDKEGGSYLLSRKRLLARKVWKEIEEKAANGEELEVPVTQVVKGGLVVDA-GVRGFIPASMIENRY------------VDDLNAYKGQTLKVKIIEIKPEDNRLILSHKAVINAERAEKRQEVLSSLQEGEVVTGKVARLTNFGAFVDL------------GGIDGLVHISEISYERVEKPSDVLKPG…
>non-CPR_non-CPR_Firmicutes_NZ_CP012288
---------------------------------------------------------------------------------------------------------------------------MSE-----ESGQNDLLNAL-NSV--EDVKVGDVVTGEVLDIDDKQAIVGIEGTGVEGVVPLRELSTAHIDDINDAVKVGDKLDLVVISKDKEGGSYLLSHKRIEARKVWDDIQKKADAGEEIEAPVTQVVKGGLVVDA-GVRGFIPASMIEDRY------------VEDLSVYKGQTLKLKIVEVDPAENRLILSHKAIVQAENAAKRKELMEHLKAGDIVEGTVARLTNFGAFVDL------------GGVDGLVHVSEIAYEHVNKPSDKLKVG…
>non-CPR_non-CPR_Firmicutes_NZ_AP014680
---------------------------------------------------------------------------------------------------------------------------MAE-------EDNDLLNAL-NSV--EEVKVGDVVKGEVLAVDDRQAIVGIEGAGVEGVVPAKELSTKPVEDIKDQVKVGDVLDLVVISKDKENGSYLLSHRRLEARKVWDEIQQKFEAGETITAEVSQVVKGGLVVEA-GVRGFVPASMITDHF------------VEDLNQFKGQTLEFQIIEIEPSENRLILSHKAIVKAQHAEAAKKLFATLQPGQTVEGTVARMTSFGAFVDL------------GGVDGLVHVSEIAYERVEKPSDVLKTG…
>non-CPR_non-CPR_Firmicutes_NC_018610
---------------------------------------------------------------------------------------------------------------------------MSE-----ANNDNDLLNAL-NSV--NEVKVGDVVTGEVLAKDDQQLIVGIEGSGVEGVVPPRELSS---DQNVDDIKQGDKLKLVVTSRDKEGGSFLLSSKRLETRKVWDELAEKSKNDETITAKVSQAVKGGLVVDA-GVRGFVPASMISDHY------------VDDLNQFKGQELELKIIEIDPVENRLILSHKAIVQAEKAEEREKLMQTLHEGDVVEGTVARLTNFGAFVDL------------GGMDGLVHVSQIAYERVDKPSDVLKVG…
>non-CPR_non-CPR_Firmicutes_NZ_CP018906
---------------------------------------------------------------------------------------------------------------------------MSE-----TNNEKDLLDAL-NSV--SEVNVGDVVNAEVLAIDDNQLIVGIEGTGVEGVVPQRELASD--QDVND-IKVGDKLQLVVTSRDKEGGSYLLSSRRLQARKVWDELVEKSNNDETINAKVTQVVKGGLVVDT-GVRGFIPASMISDHF------------VDNLSEYKDQELELKIIEIDPATNRLILSHRAVLEVQKSANREKLMETLHEGDVVEGKVARLTDFGAFVDL------------GGVDGLVHVSQIAYERVNKPSDVLEVG…
>non-CPR_non-CPR_Firmicutes_NC_008497
---------------------------------------------------------------------------------------------------------------------------MSE----SQNNENDLLDAL-NSI--DTVKVGDVVKGEILAIDDQQAIVGIADTGVEGVVPKKELSTKPVDDIKSVIKVGDVLDLVVISRDKEGGSYLLSQRRLEARKVWDDIQKEFEAGNTLTAPVTQVVKGGLVVDA-GVRGFVPASMVSDHF------------VEDLAQFKGQTLEFKIVEIEPSENRLILSHRAIVEKQRAAQKEEIMAKLTAGDVVDGKVARLTNFGAFVDL------------GGVDGLVHVSEIAFERVEKPSDVLKVG…
>non-CPR_non-CPR_Firmicutes_NZ_CP014915
---------------------------------------------------------------------------------------------------------------------------MSE-----NANENDLLNAL-NSI--ETVNVGDVVKGEILAIDDKQAIVGIEGNGIEGVVPQKELSTKPVADINDVVKVGDKLDLVVISRDKEGGSYLLSVRRLEARKVWDDIQKKFEAGETIDAPVTQVVKGGLVVDA-GVRGFVPASMISDHF------------VEDLNQFKGQTLTFKIIEIEPSENRLILSHRAIVEEEKAAKREEVLANIQAGDTVTGTVARLTNFGAFVDL------------GGVDGLVHVSEIAYERVDKPSDVLKTG…
>non-CPR_non-CPR_Firmicutes_NC_004567
---------------------------------------------------------------------------------------------------------------------------MSE-----NSQENELLDAL-NSV--EEVNVGDVVKGEVLAIDDKQVIVGIQGTGVEGVVPLKELSTQRVDDVNEAAKVGDVLDLVVISRDKENGSYLLSHRRLEARKVWDDVEKEYEAGHTIKAPVTQVVKGGLVVDA-GVRGFIPASMIDDHY------------VEDLNAYKGQELELKIIEIEPSENRLILSHRAVVEKQREAQREEALKTLQAGDVVEGKVARLTNFGAFVDL------------GGIDGLVHVSEISYERVEKPADVLKVG…
>non-CPR_non-CPR_Firmicutes_NC_004567_2
---------------------------------------------------------------------------------------------------------------------------M-----------------------------------------------------A---------------------------------------------------------------------------------------------------------------------------------------------------------------IEVGTKVTGKVSGITNFGAFVNL------------GNQTGLVHISEVSDGFVKDIHDVLSVG…
>non-CPR_non-CPR_Firmicutes_NC_013198
---------------------------------------------------------------------------------------------------------------------------MSD-----NVNNETMADAL-KSV--TTVKIGDTVKADVLAVEDKQLIVGIEGTGVEGVVPIKELSTQPIDDIHDVAKVGDKLDLVVLSTDKENGQFLLSKRRLEAQKVWKEIQAKYEAGETITAPVTSVVKGGLVVNA-GVRGFVPASMVEDHF------------VEDLNQYKGKELEFKIIEIEPSENRLILSHRAIVEASKAEARKEIFAKIQPGDVVEGKVARLTNFGAFVDL------------GGVDGLVHVSEISFDHVDKPSDVLKVG…
>non-CPR_non-CPR_Firmicutes_NZ_CP020459
---------------------------------------------------------------------------------------------------------------------------MND-----DTQSETMAAAL-DSV--HEVKIGDVVKGEVLVIEDRQVIVGIEGTGVEGVVPQKELSSQPIETLTDAVKVGDQFDLVVIATDKENGSYLLSKRRLEARKVWAEIEQKFENKETIKATVLNVVKGGLVVDA-GVRGFVPASMLSDRF------------VRDLNSFKGQELELQIIEIEPSENRLILSRKALVEQERQAQLKAVFEKLLPGDIVEGEVARLTNFGAFVDL------------GGVDGLVHVSEISYDHINQPSDVLEVG…
>non-CPR_non-CPR_Firmicutes_NZ_CP014873
---------------------------------------------------------------------------------------------------------------------------MSE-----NTNNNAMADAL-NSV--HDVKIGDIVKGEVLAIDDKQLIVGIQGTGVEGVVPLKELASQPVDDIKDIAKVGDVLDLVVISTDKENGSYLLSKRRLEARKVWADIQKEFEAGNTLTATVTEVVKGGLVVDA-GVRGFIPASMISDHF------------VDDLSQYKGQELELKIIEIEPSENRLILSHRAIVEAQKAEQREKILATIKAGDTVEGTVARLTNFGAFVDL------------GGIDGLVHVSEISYERVAKPSDVLKVG…
>non-CPR_non-CPR_Firmicutes_NZ_CP012920
---------------------------------------------------------------------------------------------------------------------------MSE-----DEQTKDLLEAL-DSV--DQVNINDVVSGEILAFDKHQLIIGIDNTGVEGVVPRRELSSQPVDDVESKFKVGDKGKFVVISRDKEGGSFLLSIRRLEERKVWDELKAKAENNETITVTVQNAVRGGLVVDA-GVRGFIPASMITNHF------------VRNLNQYNGQQFECKIVEIVPEKNRLVLSHSDVVAKNQEEARSEVMDKLNVGDVVEGKVARMTDFGAFVDL------------GGIDGLVHVSEISYERVNKPADVLENG…
>non-CPR_non-CPR_Firmicutes_NZ_CP014907
---------------------------------------------------------------------------------------------------------------------------MSE-------DEKQLLDAL-DNI--KQVNVGDVVNGEILAVDNQQLMVGIDNAGVEGVIPRKEISASLEDNPTDGYKVGDQVKVVVISKDKENGSYLLSIRRLEALKIWDEIKEKAEKGENINVKVTRPVKGGLVVNADGVRGFIPASMITDHF------------VSDLNQCKGEELEVKIIEVVPEENRLILSHRAIAEKDRKEAREKIMNSIKPGDVVEGTVARLTNFGAFIDL------------GGIDGLVHISEISYDHVSKASDVLKVG…
>non-CPR_non-CPR_Firmicutes_NC_009513
---------------------------------------------------------------------------------------------------------------------------MAE------NENNDMLEAL-DSI--EQVKVGDVVKGEVLAIDDRQAIVGIKDAGVEGVVPAKELSTKPVEDINDAVKVGDELDLVVISKDKENGSYLLSHRRLEARKVWDDIQKKFDEGEHITAKVTQAVKGGLVVDA-GVRGFVPASMITDHY------------VEDLNQFKGQELEFKIVEIEPSENRLILSHKEIIQAQHEKAAEKVFAELQPGDVVEGKVARMTNFGAFIDL------------GGVDGLVHVSEISYDHVDKPSDVLTAG…
>non-CPR_non-CPR_Firmicutes_NZ_CP018888
---------------------------------------------------------------------------------------------------------------------------MVD-------NN-NMMDAL-QEM--NGVEVGKIVNVEVLTVEDSQIVVGVVGAGVEGTIQKKEYTHDYNAKLQDLVKVGDQFEALVLRKDKENGEFLFSTTRLKEREAFKALEADFEAGKVIEGKVTGSVRGGLLVDV-GTRGFLPASLISDHY------------VSDLKPYIGQTLQLKISEIDATKNRLVLSRKDLLAQEHEEAFERVASKLMVGDVVTGKVSRLTSFGAFVDL------------GGVDGLVHISEISYKRVEKTSDVLKPD…
>non-CPR_non-CPR_Firmicutes_NZ_LT630287
---------------------------------------------------------------------------------------------------------------------------MSE-------SEKDLLEAL-NSV--KPVKIGGVVKGEVLALDDKQVIVGIEGTGVEGVVPARELSIKE-EEIEDKVKVGDNLDLVVISKDKEGGSFLLSQRRLEARKVWDEIEQKFESGENITAPVTQVVKGGLVVDA-GVRGFIPASMVSDHF------------VEDLSQFKGQELELKIVEIEPSENRLILSHKEIARAQREAKRQEIMSKLAAGDVVEGKVARLTNFGAFVDL------------GGVDGLVHVSEISYERVGKPSDVLKVG…
>non-CPR_non-CPR_Firmicutes_NZ_CP016766
M--------------------------------------------------------------------------------------------------------------S-----------MSD-------TEKDLLAAL-DSV--QEVKIGDVVKGEVLAFDDKQAIVGIENAGVEGVVPARELSVK-----EDELHVGDTLELVVISKDKEGGSYLLSQRRLEARKVWDDIEKKFEAGQTITAPVTQVVKGGLVVDA-GVRGFVPASMVSDHF------------VEDLNQFKGQELEFKIVEIEPSENRLILSRRELVKAERQAKKEAVMAKLVVGDVVEGKVARLTNFGAFIDL------------GGVDGLVHVSEIAFERVDKPADVLKVG…
>non-CPR_non-CPR_Firmicutes_NC_015214
---------------------------------------------------------------------------------------------------------------------------MSE-------NSNQFLDAL-KQM--QGVEVGDIVNVEVLDVEDGQIDVGVENAGVEGVITRREYTSDRNADLRDLVKPGDKFKALVLRRDKENGEFFFSVTRLKEREAYDKLQKDFEEGKAIEGTVTSSVRGGLLVDV-GTRGFLPASLISNRY------------VSDLKPYIGKTMKLKITEIDPNKNRLILSHKDLVEEEREEAFDKVASQLVVGDVIEGKVSRLTNFGAFIDV------------GGVDGLVHISEISYKHVDKPSDALKAG…
>non-CPR_non-CPR_Firmicutes_NC_006814
----------------------------------------------------------------------------------------------------------------------------------------------------------------------------------------------------------------------------------------------------------------------------------------------------------------------------------------------MKKYQAGNRVTGVINNITDLGIFVTL-----------PNRHSGLIHHSDFGW----RERRQYQVG…
>non-CPR_non-CPR_Firmicutes_NZ_CP016953
---------------------------------------------------------------------------------------------------------------------------M----------N-EFEDLL-NSV--SQVEPGDVVTAEVLTVDASQANVAISGTGVEGVLTLRELTNDRDADINELVKPGETLELLVLRQDTDTVTYLVSKKRLEARKAWDKLVGR--EEEVVTVKGTRAVKGGLSVEFEGLRGFIPASMLDTRF------------VRNTERFVGQEFAAKIKEVDPKESRFILSRREVVEAETAAARAEVFGKLAVGDVVTGKVARITSFGAFIDL------------GGVDGLVHLTELSHERNVSPKSVVSVG…
>non-CPR_non-CPR_Firmicutes_NC_015930
---------------------------------------------------------------------------------------------------------------------------------------NEFETLL-NSV--EDVKVRDVVKGEILTIENGQATVAIVGTGVEGVLTLREITNDRDADINTFVKPGDILDLLVIKQDAEGANYLLSLKRLEARKAWTELEGK--EGEILTVKVTKDVKGGLSVDYNGVRGFIPASMIDTYF------------VKDTKKFVGQEIEAKIIEINASENRFILSRRAVVEAETIEMRKEAFAQLNEGDIVEGTVSRVTNFGAFVDL------------GGIDGLVHVSELSHNRVKRPSDVVKPG…
>non-CPR_non-CPR_Firmicutes_NZ_LN774769
---------------------------------------------------------------------------------------------------------------------------------------NEFEELL-NSV--GDVKVGDVVSGEILTVEDGQATVAIVGTGVEGVLTLRELTSERDADINDFVKSGDVKDLLVVKQESEGANYLLSEKRLAARKAFTDLEGK--EGEVVIVKVLKDVKGGLSVDLNGVRGFIPASMIDTYF------------VRDTKKFVGEEFEAKIIEVNAADKRFILSRRAVIEEESKAQRAEAFANLHEGDIVEGTVARTTDFGAFINL------------GGVDGLVHVTELAHGRVKKPSDVVTVG…
>non-CPR_non-CPR_Firmicutes_NC_014614
----------M---------------------------------------------------------------------------------------------------------SS----EM----------E-KLLLEEEKNY--QEVYKGSIVKGRVMIEKDDSFYIDL-NYKTDGILPKDQVIDS------ETIKVGDEIEVQVVKIDKNTGDILLSKKRVDEFKVWDE----VKVGDVLQVKAVEFNAKGLICVYTALRGFMPLSHIELKF------------IEDLKSYLGKTFEVEIIDIDPKKRRLIFSRKNILLKQQEALKTEVVEKIKEGEVFEGVIKDIKDYGIFVDI------------GGFTGLVHISEISWDRSEKIKEQYKIG…
>non-CPR_non-CPR_Firmicutes_NC_009089
-------MFIMEN-----------------------------------------------------------------------------------------------------D-------TM----------Q-ELLDQQEQVF--SKVKVGELTTGKITAVRNDEVQLGL-DYGFDGIIPISELNIEKNQYIEDIYHIGDEITAVITKVSQKDGTITLSKLQLDKRNDFAELQKAYDEHRIITVNVEKNIDKGVFANYNTYTFFIPISQLDTKF------------ITDTSKFVGLNLEVYIKELDVRKNRLVASHRDVLQERINKAKEDLFNSLEVGQKRDGKVTKIMPYGAFVDI------------GGIEGLAHINNLAWTRVESVEDVVSEG…
>non-CPR_non-CPR_Firmicutes_NC_009633
---------------------------------------------------------------------------------------------------------------------------MS-----HDMEE--LMEEIEKSL--IRPKRGEVVTGKVIQVSDKGITVNI-GYKADGIVPRDEISNDPTITPQDVAKADDEISVYIIKTDDGEGNVLLSTKRVEHTKGWEDLEKIHDTESLVESKVVESVKGGVIAIARGIRCFIPASQLSDRY------------VDDLKTFVGKSFNAKVIEIDRQKNKAVLSRKEVLQQENKEKKADVFAKLEKGMQIRGEVKRLTNFGAFVDI------------GGIDGLVHISELSWGRVKNPSEVVSVE…
>non-CPR_non-CPR_Firmicutes_NC_009922
---------------------------------------------------------------------------------------------------------------------------MS-----NDMQN--LMEEIEKSM--VRLRRGEIVSGKVINVTNNEIFVNV-GYKSDGIIPKDEISNDITVQPSELVKEGDEIKVYVLSLDDGDGNVLLSKKRVDLTKGWDDLEKIKEAESLVETKVIEAVKGGVVAIARGVRCFIPASQLSDRF------------VDNLKSFEGKSFTTKVMEIDRKRNKAVLSRKVVLAEENKHKKVELFSKLDKGMQISGEVKRITDFGAFVDI------------GGIDGLVHISDLSWGRVKHPSEVVTIG…
>non-CPR_non-CPR_Firmicutes_NZ_CP009687
---------------------------------------------------------------------------------------------------------------------------MS-----NEMEN--FMEEIEKSM--VRLHRGDIVTGRVINVTDDEITVNV-GYKSDGIIPRNEISNDTSVNPHDVAQIGEEIKVYIIKVDDGDGNVLLSKKKVDAEKGWEDLEKIKESQSLVETKVIEAVRGGVIAICRGIRCFIPASQLSDKY------------VDDLRSFIGKSFNTKIIELDRRKNKVVLSRKVVLREEFKEKKNEVFSNLQKGDRIKGEVKQITDFGAFVDI------------GGIDGLVHISEISWGRVKHPSEVLKTG…
>non-CPR_non-CPR_Firmicutes_NZ_CP017269
MAGYPQVVQKLES------ATCPFVRKVQKIVYEYHQKTHPEVIGINGWIVAQTTITSELWNAILKELNHK--CVATRERQSS-----CANVA---QQVDAMIVIGG---HSS-NTASTPIEKMSSMDQNNEMMN--MMEEIENSL--RVPRRGHTIKGKVIHVTDSEIMVNI-GYKSDGIIPKQEISNDLSVNPRELVKEGDEIEVYVLKTDDGEGNVLLSKKRIDAEKGWETVEEAASKGTTLQVKIVEVVKGGVIAVSNELRGFIPASQLSTSY------------VNNLNDFLGKQLAVNVIDFNREKRKIVFSHRAVLEKENVEKRKSLWQKIQKGSVIEGEVKRLTNFGAFVDI------------GGIDGLVHISDLSWGRVSQPSEVVKVG…
>non-CPR_non-CPR_Firmicutes_NZ_CP007452
---------------------------------------------------------------------------------------------------------------------------MLT------MQE--LLDNEEQEM--KRIKTGDIVKGTVILVNDNEVMVNI-GYKSDGIITKSEFSSDSDVVLTEAVKENDEIEVYVVKLNDGEGNVLLSRKRLEGLKVWDDFIAMHETGEIFPVRVVEVVKGGAMALYKGIKGFIPASHISMGF------------TKDLAEFVGKTLEVKVIEVDKGKRKLVFSRKEVEKKEIESKKAAVLDSIQKGEVRKGQVKRLTDFGAFVDL------------GGIDGLIHVSELSWKRVNSPAEVVSEG…
>non-CPR_non-CPR_Firmicutes_NC_018664
MSGFNQAIEELKK------CTCLFVRKIQKKVNECYNKNHPEVIGINGWIVAQTTITNEKFETLSELVSKK--CNATHIRQNS-----CKDVS---QEVDAMIVIGG---HSS-NTASTPYDKMVNISED---NN-DMAALLENSF--KNISKGDIVKGQVISIG-EEVVVNI-GYKSDGIITKQELTNDLNTNPYEVVKIGEQIDVLVLEINDGEGNVLLSKKRVDNKKSWQDLEGNYKNEDIITVKVTEVVNGGIVVNVKGLRGFIPASQVSNKF------------IKDLNSLIGRELDVKIIEFNKEKNRIVMSRKIIESEEIENTKERVWSKIKKGQKLNGKIKRLADFGAFIDI------------GGVDGLAHISDLSWSRLKHPSEVVNVD…
>non-CPR_non-CPR_Firmicutes_NZ_CP012068
MSGFKIVTSQLEN------TTCPFVSKIHTIVNSACKENHQEVIATNGWVVCQTTIRKELFESIIDALEAK--CNATSLRQDA-----CQRLA---KEVDAMIIIGD---QSS-NTASTPIANMSE---ETTM-A-DFMDEIDASL--RLPHNGEIVDGKVHQVSDREVIVNL-GCKKDGILPVEEVTLEEGEKLTDLFQPGDEIQAKVVKTDDGDGSILLSKKKLEISKHWAEINEAHENKTVITVKVLRAVNGGVIAAYKEVTGFIPMSQLSDRY------------VENADEFIGQTLDVLVTRVDAKRNRALFSHKAILLAEKQKLISGIWDSISVGDIVEGTVMRFTDYGAFVDI------------GGIDGLLHISEISWGKLKHPQEVLETG…
>non-CPR_non-CPR_Firmicutes_NC_016630
----------M---------------------------------------------------------------------------------------------------------SS----EM----------E-KLLQEEEQNY--EEVYRGSIVKGYVERVKPDSYYITL-NYKTDGVLPRSEMSGD------EELQVGDEVSLEVIKIDKNTGEIILSKKRLDAFKAWDDLE----VGKVIDVKVAEIGNKGLIVKYNSIKGFIPLSHVANRF------------VEDLQEFAGQEFQAEIIDVEPRKRRLILSRKVIIAREEEAKRDEFVKTLEVGNVYTGVVRDIKNYGMFVDL------------GAMTGLVHISELSWNRRDKIEELYKVD…
>non-CPR_non-CPR_Firmicutes_NC_014387
---------------------------------------------------------------------------------------------------------------------------MSE----------TFEQMLNESF--KTIHTGEVVEGTVIDVKPDEIILNI-GYKSDGVLTKNEYSNDNSIDLTTAVKVGDTMDVKVLKTNDADGQVILSYKRLAIDRGNKRIEEAFNNKEVLTAKVVQVLEGGLTVVVDEVRIFIPASLVSDSY------------EKDLSKYQDQEIQFVVTEYNPKRRRYIGNRKMLVSAEKAEAAKKLFDTIKAGDVVDGVVKNVTDFGAFIDL------------GGADGLLHISEMSWGRVESPKKVFKIG…
>non-CPR_non-CPR_Firmicutes_NC_015977
---------------------------------------------------------------------------------------------------------------------------MSE----------SFEQMLEESF--KTIRNGEVVEGTVIDVKPDEIVLNI-GYKADGIITRNEYTNEANVDLTTLVSVGDTMEAKVLKVNDGEGQVLLTYKRLAAEKGSKRLEEAFENKEVLTAKVAQVLDGGLCVNVDETRVFIPASLVSDTY------------EKDLSKYKDQEIEFVISEFNPKRRRIIGDRKQLLVAKKLEQQKELFARIKIGDVLEGTVKNVTDFGAFIDL------------GGADGLLHISEMSWGRVESPKKVFKVG…
>non-CPR_non-CPR_Firmicutes_NC_014376
---------------------------------------------------------------------------------------------------------------------------MSE----------SFEQMLEESL--KTIRTGEIVTGKVIDVKEDEIVLNI-GYKSDGIIPRSEYTDNQNLDLTTAVQVGEEMEAKVIKVNDGEGQVALSYKRLAADRGNKRLEEAFENHEVLTAKVAQVLDGGLSVVVEGARVFIPASLVSDTY------------EKDLSKYADKEIEFIITEFNPKRRRIIGDRKQIMVAKRAELQKELFDRIHTGDVVEGTIKNVTDFGAFIDL------------GGADGLLHISEMSWGRVESPKKAFKAG…
>non-CPR_non-CPR_Firmicutes_NC_012778
---------------------------------------------------------------------------------------------------------------------------MSE--------E-SFAQMLDEEW--KEIRTGEVVDGRVIAVKPDRIVLNI-GGKSDGIITRSEYTSAPDVDLTTVVSVGDEMKAKVLKSNDGEGQVALTYRKLVADNGNKKLEDAFNNQEPITG-VAKNIKGGLEVIVDEARVFIPASLISDTF------------VKDLSVYNGKEVTFVITEYDPKNRKIIGDCKQLIVAAKKAAAEAVLSKIKEGDTIEGTVKNVTDFGAFIDL------------GGVDGLLHISEMSWGRTENPKKVYKIG…
>non-CPR_non-CPR_Firmicutes_NZ_LT635479
---------------------------------------------------------------------------------------------------------------------------MSE----------TFEQMLEESF--KTIRNGEVVDGTVIDVKPDEIILNI-GYKADGIITRSEYTNEPNVDLTTIVNPGDTMTAKVLKVNDGEGQVLLTYKRLAAEKGNERLREAFENKEVLKAPVTQILGGGLSVVIDEARVFIPASLVSDTY------------EKDLNKYQDQEIEFVISEFNPRRNRIIGDRRQLLVARKAEKQKELFEKLQVGDRIEGTVKNVTDFGAFIDL------------GGVDGLLHISEMSWGRVENPKKVFQVG…
>non-CPR_non-CPR_Firmicutes_NC_010001
MAGFDEVVKDLED------ATCPYVLKIHRIVKEQSELEHPEVSGIIGWIVAQTTFNYKNFQELVEIISKK--CNATEERQTE-----AAMLS---KTSEAMIVIGG---HSS-NTASTPHTRMAE----------SFEQLLEESL--VTIHNGEVVDGTVIRVKEDEIVLNI-GYKADGILTRNEYTNQPNVDLRTVANEGDTMTVKVLKVNDGEGQVLLTYKRLAAEKGSKRLEEAFNNKEVLKAKVAAVLDGGLSVIVDEARIFIPASLASDTY------------EKNLDKFKDQEIEFVISEFNPKRRRIIGDRKQLLVAKKQELSKALFAKIKVGDVVEGTVKNVTDFGAFIDL------------GGADGLLHISEMSWGRIESPKKVFKVG…
>non-CPR_non-CPR_Firmicutes_NC_015275
----------MEE-----------------------------------------------------------------------------------------------------N-------TM----------A-DLMAEVDKSM--TRIYRGQILPAKVALVGEQGVIVNI-GYHADGLIPWQEVAYD--EIDRTSIKEDDTFDVYVMKVDDGEGNVLVSKRRAEAETAIEEIQELFEKKATFTVHVKEVVKGGVVAPIKGLRGFIPGSQLTNTY------------VADLAAFVGKDIEVEIIEFVPKSKKLVLSGKRIATEKAQAEKTQKLAALVEGEKVSGTVTKLMPYGAFVDL------------GGVEGLVHNTDLSWVRIKHPSDVVKEG…
>non-CPR_non-CPR_Firmicutes_NC_009698
---------------------------------------------------------------------------------------------------------------------------MSE---EITMKD--MMEEINSSM--KRIHKGELLKGKVISVSDKEAVLNI-GYISDGILPKKEVVDNEEVNLKDIISKDDVISVCVLEVNDGEGNVLLSKKKAEIIEAWSKLEKAFKNEEILEIKVEEIIKGGAIGHIQGIRVFIPASQIDNKY------------VKDLNVFKGEMVKGRLIELDKQKRKIVLSSRVVKEEEEAKRKEELLNSLEKGQKIEGVVRRLEKFGAFVDI------------GGMDGLVHNSQLSWGRVNHPSEVVSIG…
>non-CPR_non-CPR_Firmicutes_NC_004557
---------------------------------------------------------------------------------------------------------------------------MSKINEDLTM-E-NMIEEIDKNM--KKVKEKDIVKGKVISVSEDEVLINI-GYVADGIIKKSDLED---IDFKEEFKKDEEVYVYVVKLNDGEGNVILSKRIADKIRTLDKLEKDFKEGNIFKIKIEEIVKGGVITHINGVRAFIPASHISSKF------------VQDLNEFLGKEKDVKVIEFNRKDNKLVLSAKEVEDEKLTKKREELWKTLKEGEKINGKVVRLVKFGVFVDI------------GGIEGLVHLSDLSWKRVNNPSDIVKEG…
>non-CPR_non-CPR_Firmicutes_NZ_CP015756
---------------------------------------------------------------------------------------------------------------------------MTTIKEEVTMKD--AMENTAETM---VINSGDVVLGTVLSVSEEEVLVNI-GYMTDGVITKEELSNDKEANITDLVKVGDQISVYIMKVNNGEGNVLLSKKRADGLKIWDEFQEILDANKTLEVTVSDIVKGGATAYIEGVRAFIPASQISDSY------------IENLEDYKGKTLVVKIIELDKENKNIVLSRRVIEKEENAVKRDQIWNELKKGEKRKGVVTRLAKFGAFVDL------------GGIDGLIHVSQLSWKRVQEPSEVVAVG…
>non-CPR_non-CPR_Firmicutes_NZ_CP011804
---------------------------------------------------------------------------------------------------------------------------MTEIKDTNSMKE--FMEDIESSM--KSIRRGEVVKGKIISVTENHAIVNI-GYMSDGILSKSEVVENEEDNLSDILKENEEIYVYVLDMNDGEGNVLLSKKAADKIKAWDELKKAFEEKSDVETTVKEVVKGGVVTYINGIRAFIPASQLSLSY------------VEDLKSFIGKTLTVKVIEFDKDKEKVVLSRKVIEKAEAEEKKQHLLNSIKPGEKRSGVVSRLAKFGAFVDL------------GGVDGLIHVSELSWKRVNNPADVVSVG…
>non-CPR_non-CPR_Firmicutes_NZ_CP014176
------------------------------------------------------------------------------------------------------------------------------------MKE--FINEIDKSL--NKIYKGDILKGKVLSVKDNDVLVNI-NFMYDGIIYKNEVC-NEDENLKEFINEGEEIEVYVLGINESEGHVLLSKKKADAIKSLDKIEEAYKNNDVIIATTMEVVKGGIIADVDGIRAFIPASQVSNEY------------VKDLSKFINKKFNVKVIEFNKENNKIVLSRRIVLDEEKEKKSNDLWNSLKKGEKRKGIVSRLVNFGAFVDL------------GGVDGLIHLNDLSWKRIMKPSDVVSIG…
>non-CPR_non-CPR_Firmicutes_NC_021182
KAGFNDVVKYLEE------ATCPFVAKIHEKVKEYSENDHPEVMGINGWVVAQTTEKQENWEKVLSAVSEK--CSATEIRQKK-----AEELS---KNSDVVVVIGA---HSS-NTASTPINKMSD---NEGMNE--VIRMMDENE--KKVYVGALLKGEIIQINDKEAFLNI-GYKNDGILPLSEVTSDPNVKLTDLFTVGEEIKTKVIKLKNEDNYVVLSRSELERDEGHKAIKEAFESKASIKVLVKEEVNGGLVSRYKGIRVFIPASHIELYH------------VDDLSAYVGKELEINIIEFSKRRNRIVGSRRDLLKSVKQESEEKTWESLEKGQIVEGQIKRLTNFGAFIDI------------DGVDGLLHVSEISWGRIEKPSDALKVD…
>non-CPR_non-CPR_Firmicutes_NC_003030
----------------------------------------------------------------------------------------------------------------------------------------------------------------------------------------------------------------------------MRNE---LNSNEYNLMASRQSRKILTGTLAAMEIGQGVVFYDEFKILIPIREMNVS----------REDKRVIRSMIGAEIDFIVMEFDDENRTAIASRKEAME----LRKNLELKKHKVGEKIFVRVTSVGRNNCRVDC------------YGIEYRVPINEIDYGYIDKVDKYVQVG…
>non-CPR_non-CPR_Firmicutes_NZ_HG917868
KAGFNDVVKKLRK------ATCPYVTNIHKKVEKYHNNNHPEVIGINGWIVTQTTNKISNFVKAVEEATKL--CSATEVRQKN-----AEELS---KRVDIMIVIGG---HSS-NTASTPINKMNN---ELTMND--VLNQMDSAE---SIRVGSKVKGKVISINDKEAYLDI-NNKAEAFLPVTEVSLPENTSLDEYLKTGDEVEVKIIKLKNDDGYVVVSLLELQRELIVKELSDAFQNKTIINVKVVEVVKGGVICLFKAARVFLPASQIELNH------------VEDLSIYVGKELEVNVIEYEKKNRKIVVSRRVLLEDKKSKEEAKVFETIKVGDIVEGEVKRITDFGAFIEI------------QGVDGLAHISELSWGKVSKITDVLSIG…
>non-CPR_non-CPR_Firmicutes_NC_020291
---------------------------------------------------------------------------------------------------------------------------MLNEEVQDSMKE--LLKEYD--V--KKLNMGDILKGTVIDVNDKEASVNI-NYAFDGLISKEEISLDGK-DPREVLSKDDEIDVYVISPNDGEGYVELSLVRALQIKEKEDIEEFYKNQKNITVKIKEETKGGVIAYYGNIRIFIPGSLAGRQR------------VE-LNTLVGKELEIRITELDLRNNKIVGSRRVIEEEEYNKNKKIIWESLKEGEKKTGIVKKLVKFGAFVDI------------GGVEGLIHISDLSWERVNKPEDVVKEG…
>non-CPR_non-CPR_Firmicutes_NC_020291_2
MAGFNDVVKFLEN------ATCPFVTNIQKKVKKYSKENHPEVIGINGWLVSQTTEKMKNWENTLVNLSR---CSATEVRQKS-----TNQIS---KEADAMIVIGG---NSS-NTASTPLDTMNE----VNT-E-NQLDLMNQNI---KVIIGTEVEEKVISKNNDGIVIEMNGYGIDGIIPYNELTTKGDKSLADSINVGDLIKAKVIKLQNNDGFVVLSRLEYEREEAYKELEKLFTEGTIFEVNIKEAREKGLVSDYKGVRIFIPASQIDIRF------------IQNKDEFVGKNLEVKLIDFSLGKPKVVASRRVLLEEAKNAEEAKALENINIGDVVKGEVKRFTNFGAFINI------------NGIDGLLHLSQISWNHIKNAGDVLKEG…
>non-CPR_non-CPR_Firmicutes_NZ_CP010086
---------------------------------------------------------------------------------------------------------------------------MSNGELESNMSE--LLNQYD--V--KRLNRGDVLKGKVIDVNDKEVSVNI-DYAFDGLIAKEEVSIDDR-DPMEVVSKDDEIYVYVISPNDGEGYVELSLIKALEIKDREELSECFKEKKNIKVHVKEETKGGVIAYYGNVRVFIPGSLASRER------------IE-LSSLVGRDLDVRITELDFKNKKVIASRRIIEEEEYNKNKKNIWDNLKEGEKRNGVVKKIVKFGAFVDI------------GGVEGLIHLSDLSWERVNKPEDIVKEG…
>non-CPR_non-CPR_Firmicutes_NZ_CP013252
---------------------------------------------------------------------------------------------------------------------------MANEEILNSMDE--LLKDYD--V--KKLNRGDILKGTVIDVNDKEVSVNI-NYAFDGLISKEEVSSDEK-DPRDVVAIGDEIEVYVISPNDGDGYVELSLKRSKQIKEKENIKDAFKNGNIVSVKIKEEIKGGLAAYYGNLRVFIPGSLASRER------------IE-LSTLVGKEIDVKITELDLNNNKIVASRRVIEEEEYNKNKKVIWNSLQEGEKRTGVVKKLVKFGAFVDI------------GGVEGLIHLSDLSWERVNKPEEIVKEG…
>non-CPR_non-CPR_Firmicutes_NC_010674
---------------------------------------------------------------------------------------------------------------------------MS----DNTMKS--FLEEYD--V--KRINKGQILKGKVLEVNEKEAVVNI-NYAFDGLIAKEEVSIDDK-NPMDVLSVDDEIDVYVISPNDGEGYVKLSLIKALVIKEKEQLQKAFKEEKNVKVYVKDEIKGGLISYYGNIRVFIPASLASRNM------------I-DLSALKNTELEVRIIELDFRNNKVVASRKAIENEEYEKNRKVIWNSLKEGEKRTGVVKKLVKYGAFVDI------------GGVEGLVHISDLSWNRVNRPEEVVKEN…
>non-CPR_non-CPR_Firmicutes_NC_008261
------------------------------------------------------------------------------------------------------------------------------MSENLTMSE--LMDSFE--L--KHFHKGEIVKGKVISVKNDEIIVNI-GHFADGVVPRNEISNDKN-FDINSINVDDDIFVMVLSGDDGEGNVLLSKKRADAIKVWDDLKEAFEEEKSIKVSLKEVVKGGIVGDFNGLRVFMPASQCAGRR------------IENLEELVGKTLEVRVIEFNKENRKVVVSRRVIDEEIRNNEKKALWSSIKEGEKRKGKVTRLAKFGAFVDI------------GGVEGLVHLSDMSWSRVHKPEEVVSVG…
>non-CPR_non-CPR_Firmicutes_NZ_CP006905
------------------------------------------------------------------------------------------------------------------------------MTTENTMGE--LLNSYD--V--KRINKGDILNAKVIDVNDKGVTVDI-KYAFDGIITREELTANDQ-NPMDVVKVGDEFKVLVLSPNDGEGFVSLSRKRVLLKEERENIRKAFNNEEIIKINVKEEVKGGLVAYYGSIRVFIPASLASRDK------------ID-LKSLIGKELEVKIIELDFNRNKVVASRRVIEDEIYEKNQKAIWDSIKPGEKRKGVVKNVVKFGAFVDI------------GGVQGLVHINDLAWERVKKVTDVVNIG…
>non-CPR_non-CPR_Firmicutes_NZ_LT799839
---------------------------------------------------------------------------------------------------------------------------MINQTGENSMKE--LLNDFD--V--KRINKGDILEGKVIDVNDKEVTVNI-NYAFDGVISKEELTTTSE-NPCDVVKSGDKISVYVISPNDGEGYVLLSRVRALAVVEKDQIVKAFKNEEVINVKVKEEVKGGLVAYYGSTRVFIPASLASRER------------VE-LKTLIGKDLEVKLTEVDFKNRRVVASRRVLEDAIYEANKKKIWNSLKAGEKRNGVVKKILKVGAIVDI------------GGITGLIHINDLAWGRVKRVEDVVNVN…
>non-CPR_non-CPR_Firmicutes_NC_008593
MAGFNDVVEFLKS------ATCPYVAHIHETVKKYYELSHPEVVGINGYIVSQTTEKQENFNKVIDKITPL--CNATKTRQES-----AEKLS---QKVDSMVVIGG---HSS-NTASTPISKMSE---NSAFNE--QLAYMEQND--IQIAVGDTVKGQVISLNEKEAFVNI-GYKKDGIIPLKEATRDENISMKDLFNIGDEVTTKVVSLKNNDDCVVLSKIEIEREEAFKEIEEAFNNKTTLNISIKESVKGGIIGRYRGVRIFVPASHVELFH------------VEDLSVYIEQEMTVSIIEFRVNRKKIVASRRNVLQKEQAKQEEEAWETFKKDDVVEGEIKRLTNFGAFVDI------------NGIDGLLHVSEISWGRVEKPEDILSVG…
>non-CPR_non-CPR_Firmicutes_NC_008593_2
---------------------------------------------------------------------------------------------------------------------------MEKKVQEESMQD--IMEAIDKTM--EPIYVGDIIEGEVISVSQNEVLVNI-GYITDGVIKKNEVCSD-DEELKDILKSGDKVDVYIVKINDGEGNVLLSKKKADSVKAWDTLKDAFKNGTILEAKVDEVVKGGVVSYINGIRAFIPASQISASF------------VKDVKVFLGKTLKVKVIEFDGKKNKVVLSAKEVELKEIENKKQKVLASLKKGEKRSGVVRRLAKFGAFVDL------------GGVDGLIHNSDLSWERVNNPSDVVKVG…
>non-CPR_non-CPR_Firmicutes_NC_015425
---------------------------------------------------------------------------------------------------------------------------MEKTLQETSMEE--MMKAIDETM--KPIYSGDIVEGEVISVSTNEVLVNI-GYINDGIIKKNEICNE-DEDINNFIKQGDKIEVFIVKLNEGEGNVVLSKKKADIARTWRNLNNAFKNNTVLEVKVAEVVKGGVIAYINGIRGFIPASQISISF------------VKDLTSFVEKVLKVKVIEFDEKKNKVVLSGKEVELKERQNKKEKVLDSLKNGEKRTGIVRRLAKFGAFVDL------------GGVDGLIHNSDLSWKRVNDPSEVVKVG…
>non-CPR_non-CPR_Firmicutes_NC_015425_2
MAGFNDVVKFLNS------ATCPYVAHIHERVKKYYELNHPEVIGINGYIVAQTTEKQENFEKVTKKIKPL--CSATKIRQEA-----ASILS---QNVDTMVVIGG---HSS-NTASTPILKMSE---NSELNE--QLAYMEQND--IQVAIGDTVKGQIISLNEKEAFVNI-GYKKDGIIPLKEATRDEDVLIKDLFNVGDEVEAKVISLKNSDDCIVLSKIEIEREEAFKEIENAFNNKGEITISIKESVNGGIIGRYKGVRVFVPASHVELFH------------VDDLSTYIGQDMQVKIIEFKVNRKKIVASRRELLVKAQAQKKEGAWNSLEKDQVVEGEIRRLTSFGAFVDV------------NGIDGLLHVSEISWGRVEKPEDVLKIG…
>non-CPR_non-CPR_Firmicutes_NC_009706
MSGFSDVVNNLKK------ATCPYVSNIQKKVEKYYKLNHPEVVGINGWIVSQTTEKQSNWEKVLNIVAKE--CSATEFRQKA-----AECIS---KKVDMMVVIGG---NSS-NTASTPVLKMSD---NLELNE--QLSYMDKND--TQIILGEKIKGIVISVNSKEAFLNI-GYKSDGVLPKSEITKEEDNNLEELIHIGDELDVKVVRRQNEDGYVVLSKLELDRENAYKELEDANINNTCLKVTVKEDVNGGLVANYKGARVFIPASHVELYH------------VNDLSQYVDKELEVNIIEFKQERKRVVASRREILRIEREKREEETWNRLEKDMVVEGEVRRLTDFGAFVDV------------QGVDGLLHVSELSWGRVNKPGDVLKIG…
>non-CPR_non-CPR_Firmicutes_NC_009706_2
----------------------------------------------------------------------------------------------------------------------------------------------------------------------------M-GFMI---------------------------------NNDQTNSVDGIINETDMESVWSKLENEFKNEDIFEVVIKELVKGGLIADLHGLRAFIPASHISVKY------------TDDLKEFIGKTLKVKLIQLDKSKNKIVLSGKEVEKLELEEMSKKLWSTISKGDKIEGRVSRITNFGVFVDL------------GGVEGLVHISELSWKKIKDPSEVVSVG…
>non-CPR_non-CPR_Firmicutes_NC_022592
---------------------------------------------------------------------------------------------------------------------------MGN-NELNSMNE--VMDQIDSSM--KNVRSGEVVKGKVISVTDEQAMVNI-GYIVDGVLPKSELCKDENVNVDEVLKVGDEIYVYVIKTNDEDGNVLLSKIKADREICWDRLTEVLKDDKAFEIVVKQVVKGGVIADLYGLRAFIPASQLSVKY------------VSDLNEFLGKTLLVKIIELDKSKSRIVLSRKEVEKLEFEKKKEKLWSSISKGDKVKGVVSRLTGFGAFIDL------------GGVEGLAHISELSWRRIKNPSEVVSVG…
>non-CPR_non-CPR_Firmicutes_NZ_CP014170
---------------------------------------------------------------------------------------------------------------------------MTN-NEENLMNK--YINGINSTM--DNIKIGEIVSGKVISISDENVIVNI-GYMYDGILNKKDIS-KENLKPAEMFKPGDEIDVYIEKINDKEGLLILSKIRADKKIHWNNLKNAFENEENVECKIKEVVKGGVAAYLGEIRGFIPTSQLSVKY------------VENLNEFVDRKLEVRIIDINEAKNNIVLSRKKVEEVELEEKKNDTLNKIKPGDKVKGKVTKLMKFGAFVDL------------GGVEGLIHISELSWERVKNPSDVVSIG…
>non-CPR_non-CPR_Firmicutes_NZ_LT635475
---------------------------------------------------------------------------------------------------------------------------MNEVSNETTVQD-AMMQQIEDTF--TRIRRGQIVPGEILYVTDNQIMVNI-NFRSDGIINRDEMPE-DIEDPREHFKAGDQIDVYVVKVDDGEGNVVLSLRRIKDVKAWDDLEAKFEAKEHLNVLIKEEVNKGLVADYEGARLFMPASHAYDRF------------RKNLSGLVGQTVEVELIDFDKSRRRAIVSRREIERERIQKEKDEFWSQIEVGQVRTGKVARLTNFGAFIEL------------GPVDGLIHISDMSWGRIRSPKELLNVG…
>non-CPR_non-CPR_Firmicutes_NZ_LT635480
MAGFPRYVAQREQ------GTCPVLLGIYKLGRKKNEECHPEIRAMRSYILSQTTNRPVYFEEMAREVLAH--CHATAERQQA-----VLDLQ---GKIDALLVVGG---NSS-NTASTPVTGMDN-S-----SK-DFMEQIEDSF--VKIYPKDIVKGTVISVKDDEVFVDI-RFRADGIVKSDEMTDEEKADTHAAFHENDEIDVYVIKLDDGEGNVVLSTRRVEGLRNWQKLVEHYEANETVEAKVLGDNSGGLVVSVFDINGFMPASQITTHY------------VKNLKKYIGQTMECKIISIDERKRRVVLSRRVLKDEEL----DAVWETIVPGERVKGKVVRMTDFGAFVDL------------GGVDGLIHVSDISWERIAKPSDALEVG…
>non-CPR_non-CPR_Firmicutes_NZ_CP009761
MAGFPQVVEKFNK------CTCPVLLNIYKKIEKKVENNHPEIKAMIGYIISQTTNLVEKFFQFSDIIKGK--CDATSKRQNS-----CEEIS---KRVDCMIVIGG---SSS-NTASTPVEGM-ELSK-----D-EFMEQIEGSI--KKIYPRDVVKGTIIYVTETEVMVNI-GYRSDGIIKLDELSSDVTKKPKDLFHEGQEIDVYVIKLDDGEGNVVLSTRRVESLKDWQNLVEKFNNKELVEAEVVKEVKGGLLATVDGINAFIPASHITTSF------------VKDFTPYIGKKLECAIINIDERKKKIVLSRREVEEKELQEKLDLAWSKLAVGDVLRGTVRKLTDFGAFVNL------------GDVDGLIHVSDISWNRIKKPSDILSVG…
>non-CPR_non-CPR_Firmicutes_NC_010376
MAGFEQECKRLEN------LTCPSLLKIYEKINKKHDENHPEIIAMKGQVISQTTNLKRKFLEISDIIVEG--CGATKSRQMA-----CLELS---KNVDCMIVIGG---NSS-NTASTPVNLMDN-------SK-DFMEQVEESM--NKIYPKEIVKGEVIYVTDDEVMVNI-GYKADGIIKLDELSTEEGKLPKDLYKQGDEIEVYVIKLDDGEGNVVLSTKRVEGIKNWKNLVSSFDNDSTVEAKVTQVVKGGLIATIDNVRAFIPGSQVTTHF------------VKDLSKYVGETLVCKVLNIDEKKRRLVLSHRAVVEAEQKEIEDKAWENITVGEKITGKVQRLTDFGAFIDL------------GGVDGLLHISDISWNRIESPEDVLKVG…
>non-CPR_non-CPR_Firmicutes_NZ_LT635772
MSGFPQLVEEFSR------ATCPVLNNIYKKIKDKENDSHPEIIAMDSFVVSQTTNRLEYFMNIANKLEEN--CNATKLRQDS-----ARKLA---SQVDCMIVVGG---NSS-NTASTPVSSMDE-T-----KE-EFMNSLENSL--RKIYPKEVITGTVINVKDDEVFVDI-QYRADGIVKLDEMTEEEANDPKNSFEVGEDIDVYVIKLDDGEGNVALSTRRVEGMKAWTELAEKFENEELVHGKVNGFNKGGLTVEVNGVNGFIPASQIATYF------------VKNLKKFVGEEWDLKIVSIDERKNRLVLSRREVLEEEL----DSLWEELEEGQVVKGKVARLTDFGAFVEV------------NGLDGLLHVSDIAWTRVEHPSDVLNVG…
>non-CPR_non-CPR_Firmicutes_NC_011899
LSGFPQVVKRLKE------ATCPYVKNAQKYARELVDKDHPEVIGINGALIAQTTKSPASFQKIVSYILPE--CRTTETRQKS-----AVDLA---RQVDAMFVIGG---NSA-NTASTPIEAMSEEKRDAELQE-EEFNYDDNNP--ADLKKGQQVKGKVVEIGDNGVYVDV-GYKTEGLIPLRELSHRDFEDPHEIVEEGEEIDVIVLTLEDEEGNMVLSKKRADFEKAWERILKAYENDEIIEAEVTREVKGGLVVDI-GLRGFVHASHVAIGY------------VEDLSDYVGKTLRLKVIEVERDKNNVVLSAKKVLEEEREKQKEKTLEELQEGQVVKGKVTKIVDFGAFVDL------------GGIEGLLHISEMSWGRIEHPSEVLEEG…
>non-CPR_non-CPR_Firmicutes_NC_017455
LAGFPQVVERLEK------ATCPYVKNAQKYAKRLVDEDHPEVQGIYGALVAQTTKSPESFREIIDLIATK--CNTTDVRQSS-----AKKLA---EDVDIMFVIGG---NSA-NTASTPVQLMNEENKEVNVEE-AEFKYSDNDI--ADLSKGQKVTGTVVEINENGVYVDV-NYKTDGFIPLRHLSHRTVEDANDIVSMDEEIEVVILTLEDEEGNMVLSKKQAEYEKAWEKIEEAYNNEEIIEAEVTKEVKGGLVVDV-GVRGFIPASHVAIGY------------VDDLKDYVGESLRLKVIEVERDNNNVVLSHKKVLEKERAAKKEETLASLEEGQTVEGTVTKLVDFGAFIDL------------GGIEGLLHISEMSWGRIESPAEVLTEG…
>non-CPR_non-CPR_Firmicutes_NC_014654
LAGFPQVVENLEK------ATCPFVKNAQKYARKLVDEDHPEVKGIYGSFVAQTTKSPESFRDIISYIITE--CNTTDVRQSS-----AKKLA---EEVDIMFVIGG---NSA-NTASTPIQLMNEENKEMKIEEAAEFKYSDNDI--ADLSKGQKVEGTVVEINDNGVYVDV-NYKTDGFIPLRHLSHSPVEDPREVVEMDQKIEVVILTLEDDEGNMILSKKQADYEQAWEKIVEAHENDEIIEAEVTKEVKGGLVVNV-GVRGFIPASHVAIGY------------VDDLSDYVGETLRLKVIEVERDNNNVVLSAKKVLEKERAAQKEETLEALEEGQTVSGKVTKLVDFGAFIDL------------GGIEGLLHISEMSWGRIESPSEVLSEG…
>non-CPR_non-CPR_Firmicutes_NC_019978
MAGFPQAVDKLKK------ATCPFVQRVQEKAKQLYKDDHPEVIGILGHVVAQTTQSLNKLKKLVDYLLPQ--CTTTGQRQDE-----AARLA---QDMDLMIVIGG---NSA-NTASTPVSRMAEIKQD---EE----KETTEES--TTLTVGERVTGTIAQLTEDGAYIDI-GAKTEGFIPNNEISSQRV-ASSEILSEGEEVEVEIVNPEGEDGHPILSKRKVDEEAAWAKVKEAYENEEIITAKVDREVKGGLVVNI-GLRGFIPASHVAVDY------------VEDLSQFVGQELELKVIEVEEENNNVVLSRKAILEEELSKKKEEILNSLNKGDIVEGKVTKLVDFGAFVDL------------GGVEGLLHISEISWQRIEHPSKVLEEG…
>non-CPR_non-CPR_Firmicutes_NC_014378
MAGFPQAVDRLQE------ATCPFVKKAQENASKLYQEKHPEVTAILGSVIAQTTQSIKKFKELVTKLMDR--CTTTHERQAA-----AGKLA---AEVGLMIVIGG---NSA-NTASTPVSRMEDIKKEENVEK-------------TDIERGEALTGTVEQITDDEVYVDI-GAKSEGIIPSHELSNQQFESPSDVVQEGEEVEVQVLNQENEDGNIVLSKKKQDQEKSWQRVEKVYENDEIIEAEITKEVKGGLVADV-GLRGFIPASHVAIEY------------VEDLSQYVGETLQLKIIEVERDNNNVVLSRKEVLEEERAKKKEEIFASLEEGEVIEGRVTKLVDFGAFVDI------------GGVEGLLHISEMSWGRIDHPSDVLEEA…
>non-CPR_non-CPR_Firmicutes_NC_009437
---------------------------------------------------------------------------------------------------------------------------M---------------------------K------------------------------------------------------------------------QTKKDEVRRLLQKSYNYKTILTGTVTGKKKVGGVVLYQGTRCLMPPEEVDLST----------ESINDIGALLGATIEFVVTDIQKD--NVFISRKIAKQ-----RRIEFENNVKEGQIINGRVIGVSPKNVYVDA------------FGYEFGLTAKDVDYKWIHDMRERFKVG…
>non-CPR_non-CPR_Firmicutes_NC_012034
---------------------------------------------------------------------------------------------------------------------------M-------------------------------------------------------------------------------------------------QSTQIKTDKRIYELQQALKTGRILLGEVITKEQQNAVVKWKGLRLYCDEAELGLQ-----------EQVKNADALLGALIEFVVIAQENG--RFYISRVKAME-----KRRKIWEKVKEGDIVEGRITGVTPRNAFIEV------------LGYEFALPAEEMLWNYTNDLRRHFKIA…
>non-CPR_non-CPR_Firmicutes_NC_019954
MSGFPQVVERLKC------CTCPHVKRVHNLAQDISNRNHPEVEGIKGYIIVQTTQTKENIEEIMSVLRSK--CKATQQRQEA-----AADLA---RNVDIMLVIGG---NSS-NTASTPISKMDEFNKEMNNQE-EGELNYENTF--TDLKEDTIVEGTVVKVDNNEVLVNI-GYKSDGIIPINELSDIAFESPEDIIKVGDKIQVYIMKLEDEDGNVVLSKKKADIINTWNYIEDIYNHQGDLEGIVTEVVKGGVLVDINGIKGFIPASHLDLRY------------VPDLNVFVGKKLKLHILELDRNKNRIVLSRKYVLEREREELKEKTWASIEEGQTVKGVVKRLTGFGAFVDI------------GGVDGLIHISDLAWQKIKHPSEIVKEE…
>non-CPR_non-CPR_Firmicutes_NC_014377
MAGFQQVVEKMEN------ATCPFVKKVQKLARDISEKNHPEVKGIKGWVVVQTTQTEENVKKIMDILKEK--CNATHQRQKA-----AKKVA---ESVEVMLVVGG---NSS-NTASTPISKMEEISREMENQ--QGEVAYEDGI--SELAEGKIVEGTVVKVSDKEVLVNV-GHKSDGIIPLNELSNLPFSSPSEIVKTGDRIKVQILKLEDNEGNLILSKKRADVIEAWRYLEEAFEKKQTVEGRVIESIKGGLLVNVKGVRGFIPASHADLKY------------VADLSVYVGKDLKLKVIELDRDKKRVVLSHKLFLQEEKEKLKEEIWEKVKEGQVIRGTVRKLTDFGAFVDI------------GGYDGLIHISDLSWQRVNHPSEVLSEN…
>non-CPR_non-CPR_Firmicutes_NC_011295
---------------------------------------------------------------------------------------------------------------------------M---------EE-EF-QEFD--V--EMAERGDLVEGTVLRADVDGLWLDI-ASKYDAFLPLDECTSELARQVQEG-NVPTSVEVVVTRTNDDKGYISVSQKRAAYRKLWKDVEEWEKSGESRKVKAVGADDKGVFVDLAGILGYVPASQLEIRF------------VRDTKKYVGRSLRVKILRVNRKRNQIILTQRQVLEEEQKERAEKAWLRLKDSDIVRGHVSRITDEGIFVDL------------GGIEGFVPKDELDWRPIKNIAKVFRRG…
>non-CPR_non-CPR_Tenericutes_NC_022538
---------------------------------------------------------------------------------------------------------------------------M----------T-DI----------KTPKKGQIIEAPVVKVDKNVIYLDV-QYITEGTIYLNEYDLPAPETFKGLVKVGDIVRAKIMKIEDDSTQILLSRLPLIKEEKLQTIEEDFKKQNVISTKVKDVLEKGLVLNYHGYELFLPYSLMDFDL------------TEKKDTLKNTKLDVVIAEFKEKPRKLIATRKPIYEQARQELRQEELDKIQTGDVLTGTVEKLESHAASIKF------------DHVMGMLRISQISHFRIENINEVLKVG…
>non-CPR_non-CPR_Tenericutes_NC_010163
---------------------------------------------------------------------------------------------------------------------------M----------N-DF----------IIPKKGQIIEGEVFQVKKNYVLLDI-NAATEGTIYAEYFDRPAPEDLRKVIKKGDKVRAKVEKIEDRSSLIMLSRLPLLHEKNMEKIQKAFDEKLEIETVVKSANDKGLVLNFEGIELFLPYSLLDFEL------------KDQKDKLIGQSLVVLIEEFKADRKKLIATRKPIFEARRQEARQEELETITTGAVLEGVVESFETHAAFVRF------------EHVSGMLRISQVSHHRIDKIEDVLEIG…
>non-CPR_non-CPR_Tenericutes_NZ_LK028559
---------------------------------------------------------------------------------------------------------------------------M----------S-DF----------IFPKKGQIVEGEAFDVKKDRILVSF-SAATEGTIYAEYFDKPQPQDLTKIVKVGDKIRAKVVMVEDHSSMILLSRLPLLAEKKLEILEKAYQEKQTIQAVVKQAGEKGLVLNFEGFELFLPYSLLDFEL------------KEKKEQLINQKLEVLIEEYKENKNKIIATRKPIFESIRQQLRMAELESIQTGSILEGVVESFESHAAFVRF------------EHVSGMLRISQVSHHRVDKIEDELTKG…
>non-CPR_non-CPR_Tenericutes_NC_002771
-------------------------------------------------------------------------------------------------------------------------------------------------------------------------------------------------------------------------------------------------------------------------------------------------------------------------------------------------MKVGSIIKGKVEKFNTEKIYLNF-----------KNGYKGVVEKNEIS-FNTKNISSFLAVN…
>non-CPR_non-CPR_Chloroflexi_NC_011959
----------M---------------------------------------VGQQIDEVHFGRQ------------GLGSIPVM-----------------------------D-D-AE----IF----------R-RLLDDPSYDY--RLFRYGDVVEGEVMHVDREKILVDI-GGKCEGVVPSREFQTL--PEELGRLRPGDRVLVFVLQPEDQAGQAILSIDRARQEKTWRRLQEVFEAGGVIEAEVVNYNKGGLLVNLDGIRGFVPASQVVAIRGG-----DEVSKQADMARMVGQRLKLKIIEINRHRNRLILSERQAVQEQRDAMKAQLIETLREGETRRGRVTSIADFGVFVDI------------GGADGLVHLSEISWTRVKHPSEVLRVG…
>non-CPR_non-CPR_Chloroflexi_NC_013523
----------MD-----------------------------------------------------------RIEEGMSAEPATAPA--DAE-------------------AGE-S-VS----LM----------E-QLLSDPSHDY--RVLNYGDVIEGQIMHVDRDELLVDI-GSKSEGIIPAREFSTL--DEERAALSVGDHVLVFVVQAENQEGQAVLSIDRARQEKSWRRLQEIYEAGEIIEAEVTNYNKGGLLVNLDGVRGFVPASQVTEIRGG-----DDSSKQADMARLIGSKLSLKIIEINRHRNRLILSERQAIQERRDVMKERLIEELTEGETRRGRVTSITDFGAFVDI------------GGADGLVHLSELSWSRVKHPSEVLKVG…
>non-CPR_non-CPR_Chloroflexi_NZ_LT859958
----------MNQNDD---------------------------------------------------------------NQKTG----EET-------------------QEA-P-EN----KM----------E-ALLAQEGLTI--DFPKKGEIRKGTIASVSEGQVLVSV-GAKSEGILTGKELDAI--EETRQAFKVGDEIDVYVITPEDANGNLILSFTRALEEENWKIAEDYLESEKSFTSIIEGYNKGGLLVPLGSIRGFVPASQIGLARRLSITG---SSLEERYGSMVNDVIEVCVIEVDRERRRLILSERAASSETRDTIKERVIEDLKEGEVRTGRVTSLADFGAFVNI------------SGADGLVHLSEISWEHINHPNEILEVG…
>non-CPR_non-CPR_Chloroflexi_NC_014960
---------------------------------------------------------------------------------------------------------------------------M----------E----S---E----------------------------V------------------------------------------------TTQ-------------------------------G------------------------------------VES------------------K----------------------QIQPKQ-FRAKVLKISLAGAAVDL------------GGQPAFLHISQIQ-EPIKRVSDVLQEG…
>non-CPR_non-CPR_Chloroflexi_NC_014960_2
----------M----------------------------------------------------------------------------------------------------------------V-------------I------------------------------FYLNI-GWRARRSVARAEEEVE--------MPMDEGWWASVLADEQAYGESLVKTASAKSSGNWARARQYLENDEVVKLEVYGFNRGGLLVRGEDIQGFVPVSHLVE--MPCVP-ADEEQRRQSLANYVGRILSLKVIECEMQAERIVFSERAALAGEG--KRRQLFSTLRPGEIVNGTVTNVTDFGAFVDL------------GGLEGLIHVSELSWGRVQHPTDILQVG…
>non-CPR_non-CPR_Chloroflexi_NC_014960_3
----------MDEKDT---------------------------------------------------------QLEQGMPQQ------TQD-------------------NAE-N-HD----NM----------A-SLLEKEGLGL--DLPKEGEIRTGVIASITPQQILVSV-GTKSEGVISGRELEAI--PEIRETLQVNQKILVYVVRPEDSNGNIVLSYMKAREESDWQKAEQMRETKEVYHSKITGYNKGGLIVPVHGLRGFVPASQISLSRRASM--GSGESPEQRWSKMVGEEIDVCVIEVDRERRRLILSERVATPETRETLKERVIETLAEGEIRTGRVTSLADFGAFVNI------------SGADGLVHLSEISWDRIKHPSEVLQVG…
>non-CPR_non-CPR_Chloroflexi_NC_011831
----------MEELKH----------------------------------AGNNTNNEDVRQP------------DLNDLME-----------------------------RG-D-QA----LM----------E-QILSDPAHTY--RNLKHGDTVDGRIMRIDRDEILVDI-GAKAEGVVPSREMQTL--EEDRAALKVGDTILVFVVQSEDKEGRAILSIDKARQEKSWRALQEYYERGEIIYARVKNYNKGGLLVDLDGVRGFVPASQVSSVSRA-----SEAQKQSEMARLVNVELPLKVIEINRNRNRLILSERQALVETRETKKDELLASLQEGDVREGVVSSVCDFGVFVDI------------GGADGLVHLSEISWSRVKHPSEVLKVG…
>non-CPR_non-CPR_Chloroflexi_NC_011831_2
---------------------------------------------------------------------------------------------------------------------------MT---------D-QV-RR-EE------VAAGELADTPLAAAQT--PAADV-AATAEAVAPTPEQAVDQP-------TTGESEAPVTTAAEEETGATPVSEQQPQKRR-LK-----LQPGMELEGKVTSIA--GIFVDVGGRDGLVHISEMSDRR------------ISELV-QIGDTVKVWVKSVDLDARRISLTMLNPSREKPRRVDREKLASLKVGEIVEGVITGFAPFGAFADI------------GGKDGLIHISELSEGRVEKPEDAVKVG…
>non-CPR_non-CPR_Chloroflexi_NC_011831_3
----------------------------------------------------------------------------MSVQPD------PV--T------------------RQ-N-EEDL--DW----------T-QLLD--AYDY--ARPQRGELREGLIMHIEENGVLVSI-GTKREGIIPAQDLRQM--EDFINSLKVGDTVQVYVQEPENRDGDLILSLSMVQVAKDWEVAEQLFRDGGITRCKVIGFNKGGLLVQFNRIRGFVPASQVAQLHGR-----TAAERQYALQKMINQEIPLKVIEVDRERNRLVLSERAATQEWRKAQKHRLLTELQPGDVLVGKVNQLTNFGAFIDL------------GGADGLAHISELSWQRVNHPREVLQPG…
>non-CPR_non-CPR_Chloroflexi_NC_009767
---------------------------------------------------------------------------------------------------------------------------MTD---Q---RENELLAAVDQSI--ESPPVGETPDGAGAAADSD-VAVSS-----DG------------GDSRESVRAADESPAAVAESEAETGSAEVAPEAAAPTAAYQAPAEALAPGMELEGRVTSIALYGIFVDIGGRDGLVHISEMSDTR------------ISDV--KIGDTVKVRVKSVEPDGRRISLTMRMKERAEPRSVDYDKLAALRVGDNVEGTVTGLAPFGVFVDI------------GGKDGLVHVSELAEGRVEKAEDVVQVG…
>non-CPR_non-CPR_Chloroflexi_NC_009767_2
----------MEQQEQ----------------------------------AATNHQQTNAAQSF---------AANGQSADQ-----------------------------RD-D-RE----LM----------E-QFLANPAHDY--RNLQYGDTVDGIIMRVGRDEILVDI-GAKAEGVVPAREMQSL--DDDRAALKPGDPLLVFVVQSEDKEGRATLSIDRARQEKSWRRLQQCYETGEIIEAKVINYNKGGLLVNLDGVRGFVPSSQVSGIGRG-----SEAQKQSEMARMVGQTLALKVIEINRNRNRLILSERQAAMDVREGRKGELLSALKEGDVREGVVTSVCDFGAFVDI------------GGADGLVHLSELSWSRVKHPSEILKPG…
>non-CPR_non-CPR_Chloroflexi_NC_009767_3
----------------------------------------------------------------------------MKAVPD------NA--V-------------------Q-E-TEDF--DW----------T-QMLD--DYDY--ARPQRGEVREGVVMKIEDGGILVSI-GTKREGIIPIADVRAI--DEVLNNLKVGDRIQVYVQDPENRQGDLVLSLTMVQVARDWEEAARLSAEGGIVQGQVIGYNKGGLLVQFNRIRGFVPASQVAQLHGR-----TAAERQQALQRMVGQTIPLKVIEVDRDRNRLVLSERSATQEWRKAQKQRLLTELQPGDILTGRVNQLTNFGAFIDL------------GGADGLAHISELSWQRVNHPREVLSPG…
>non-CPR_non-CPR_Thermobaculum_NC_013525
----------MTESMGTTG---PFP----GENEELDREGNP------------------------------KDNNPRSQREQ------QNS-------------------QPE-E-DI----TM----------E-DILASGEADY--RTLHRNEIVDGVVMGFDNGDLIVDV-GGKSEGIVPASELTTL--EEEKESLEPGQPIVVSVLNSEDNEGRIVLSVDRARAERLWRELQQKLETGEIVDCKVVGYNKGGLLVDLGGLRGFIPSSQISFLVSS-----NDADRQSELANLVGRTLQAKVIEVNRKRNRLILSERIATQERKETSKERLIEELREGQIVKGRVTSLADFGAFVDI------------GGADGLIHLSEISWGRINHPSEVLKPG…
>non-CPR_non-CPR_Actinobacteria_NC_014246
---------------------------------------------------------------------------------------------------------------------------MSPTTVPNDITE-DLIKEIDKTI--KYFNDGDLVSGTVVKVDRDEVLLDI-GYKTEGVILSRELSIKHDVDPDAEVKVGDEIEALVLQKEDKEGRLLLSKKRAQYERAWGDIEKVKQEDGVVTGTVIEVVKGGLIIDI-GLRGFLPASLVEMRR------------VRDLQPYIGRQLETKIIELDKNRNNVVLSRRAFLEQTQSEVRTTFLSTLQKGQVRKGVVSSIVNFGAFVDL------------GGVDGLVHVSELSWKHIDHPSEVVQVG…
>non-CPR_non-CPR_Actinobacteria_NZ_CP009244
---------------------------------------------------------------------------------------------------------------------------MPTSNTPNDIAE-DFLAAVDATI--KYFNDGDIVEGTVVKVDHDEVLLDI-GYKTEGVIPSRELSIKHDVDPDEVVEVGDQIDALVLTKEDKEGRLILSKKRAQYERAWGAIEELQAKEEPVTGTVIEVVKGGLILDI-GLRGFLPASLVEMRR------------VRDLEPYIGQELEAKIIELDKQRNNVVLSRRAFLEQTQSEVRSEFLHQLQKGQVRKGVVSSIVNFGAFVDL------------GGVDGLVHVSELSWKHIDHPSEVVTVG…
>non-CPR_non-CPR_Actinobacteria_NC_002677
--------------------------------------------------------------------------------------------------------------------------SIPAVPSPNDVSE-DFLAAIDKTI--KYFNDGDIVEGTIVKVDRDEVLLDI-GYKTEGVIPARELSIKHDVDPNEVVSVGDEVEALVLTKEDKEGRLILSKKRAQYERAWGTIEALKEKDEAVKGIVIEVVKGGLILDI-GLRGFLPASLVEMRR------------VRDLQPYIGKEIEAKIIELDKNRNNVVLSRRAWLEQTQSEVRSEFLNQLQKGAIRKGVVSSIVNFGAFVDL------------GGVDGLVHVSELSWKHIDHPSEVVQVG…
>non-CPR_non-CPR_Actinobacteria_NC_009142
----------------------------------------------------------------------------------------------------------------S-------TVPTAAATKPNDVEE-DFLAAVDQTI--KYFNDGDIVEGTIVKVDRDEVLLDI-GYKTEGVIPSRELSIKHDVDPAEVVTVGDFVEALVLQKEDKEGRLILSKKRAQYERAWGTIEELKEKDEPVRGTVIEVVKGGLILDI-GLRGFLPASLVEMRR------------VRDLQPYVGRELEAKIIELDKNRNNVVLSRRAWLEQTQSEVRSEFLNQLQKGQVRKGVVSSIVNFGAFVDL------------GGVDGLVHVSELSWKHIDHPSEVVEVG…
>non-CPR_non-CPR_Actinobacteria_NZ_CP013254
---------------------------------------------------------------------------------------------------------------------------M-TTTTPNDIEE-DFLAAVDATI--KYFNDGDLVEGTVVKVDRDEVLLDI-GYKTEGVIPSRELSIKHDVDPDEVVTVGDEVEALVLTKEDKEGRLILSKKRAQYERAWGDIEKIKEDDGVVTGTVIEVVKGGLILDI-GLRGFLPASLVEMRR------------VRDLAPYIGQQIEAKIIELDKNRNNVVLSRRAWLEQTQSEVRSNFLHKLEKGQVRTGTVSSIVNFGAFVDL------------GGVDGLVHVSELSWKHIDHPSEVVEVG…
>non-CPR_non-CPR_Actinobacteria_NZ_CP012117
---------------------------------------------------------------------------------------------------------------------------MTTNNAPNDIEE-ELLAAIDSTI--KYFNDGDIVEGTVVKVDRDEVLLDI-GYKTEGVIPSRELSIKHDVDPDEVVEVGDEVEALVLQKEDKEGRLILSKKRAQYERAWGSIEDIKENEGVVTGTVIEVVKGGLIVDI-GLRGFLPASLVEMRR------------VRDLQPYIGQELEAKIIELDKNRNNVVLSRRAYLEETQASVRTDFLQTLQKGQVREGHVSSIVNFGAFVDL------------GGVDGLVHVSELSWKHIDHPSEVVEVG…
>non-CPR_non-CPR_Actinobacteria_NC_013169
---------------------------------------------------------------------------------------------------------------------------M-TSTPTADFQE-ELLAAIDETM--KNFDDGDIVEGTIVKVDRDEVLLDI-GYKTEGVIPSRELSIKHDIDPDEVVVVGDTVEALVLQKEDKEGRLILSKKRAQYERAWGTIEQIKEDDGVVTGSVIEVVKGGLIVDI-GLRGFLPASLVEMRR------------VRDLQPYVGQEIEAKIIELDKNRNNVVLSRRAWLEQTQSEVRTSFLKELQRGQVRPGVVSSIVNFGAFVDL------------GGVDGLVHVSELSWKHIDHPGEVVEVG…
>non-CPR_non-CPR_Actinobacteria_NZ_CP011112
---------------------------------------------------------------------------------------------------------------------------MTATTTSNDIEE-ELLAAIDATI--KHFNDGDIVEGVIVKVDRDEVLLDI-GYKTEGVIPSRELSIKHDVDPGEVVSVGDEVEALVLQKEDKEGRLILSKKRAQYERAWGTIEKIKEEDGVVTGTVIEVVKGGLILDI-GLRGFLPASLVEMRR------------VRDLQPYVGKEIEAKIIELDKNRNNVVLSRRAWLEQTQSEVRTTFLKELQKGQVRTGVVSSIVNFGAFVDL------------GGVDGLVHVSELSWKHIDHPSEVVEVG…
>non-CPR_non-CPR_Actinobacteria_NZ_CP018134
------------------------------------------------------------------------------------------------------------------------TNATTAPATKNDIAE-DFLAAVEKTL--KFFNDGDLIEGTVVKIDRDEVLLDV-GYKTEGVIPSRELSIKHDVDPNEVVKVGDEVEALVLQKEDKEGRLILSKKRAQYERAWGDVEKIKENDGVVTGSVIEVVKGGLIVDI-GLRGFLPASLIELRR------------VRDLTPYLGQEIEAKILELDKNRNNVVLSRRALLEQTQSESRTTFLNNLHKGQVRKGVVSSIVNFGAFVDL------------GGVDGLVHVSELSWKHIEHASEVVEVG…
>non-CPR_non-CPR_Actinobacteria_NZ_CP007490
---------------------------------------------------------------------------------------------------------------------------MTTKTTKNDIAE-DFLAAVEATL--KFFNDGDLIAGTVVKIDRDEVLLDV-GYKTEGVIPSRELSIRHDADPSEIVSVGDTVEALVLQKEDKEGRLILSKKRAQYERAWGDVEKVKEADATVTGVVIEVVKGGLIVDI-GLRGFLPASLIELRR------------VRDLGPYLGQKVEAKILELDKNRNNVVLSRRALLEESQSASRSTFLADLAKGQIRTGVVSSIVNFGAFIDL------------GGVDGLVHVSELSWKHIEHASEVVEIG…
>non-CPR_non-CPR_Actinobacteria_NZ_CP017150
---------------------------------------------------------------------------------------------------------------------------MTSVQPKNDIAE-DFLAAVDETI--KYFNDGDIVEGTVVKVDRDEVLVDI-GYKTEGVVLSRELSIKHDVDPGEVVEVGDEIEALVLQKEDKEGRLMLSKKRAQYERAWGDIEKIKEDDGVVTGTVIEVVKGGLIVDI-GLRGFLPASLVEMRR------------VRDLAPYIGQQVEAKIIELDKNRNNVVLSRRAWLEQTQSAVRHDFLQTLQKGQVRPGVVSSIVNFGAFVDL------------GGVDGLVHVSELSWKHIDHPGEVVTVG…
>non-CPR_non-CPR_Actinobacteria_NZ_CP019458
---------------------------------------------------------------------------------------------------------------------------MTTRTTPNDIEE-AFLAAIDETI--KYFNDGDIVDGVIVKVDRDEVLLDI-GYKTEGVIPSRELSIKHDVDPNEVVAVGDEIEALVLQKEDKEGRLILSKKRAQYERAWGTIEKIKEEDGIVTGTVIEVVKGGLILDI-GLRGFLPASLVEMRR------------VRDLQPYVGKELEAKIIELDKNRNNVVLSRRAWLEQTQSEVRQTFLTTLQKGQVRSGVVSSIVNFGAFVDL------------GGVDGLVHVSELSWKHIDHPSEVVEVG…
>non-CPR_non-CPR_Actinobacteria_NC_010572
--------------------------------------------------------------------------------------------------------------------------------------------------------------------------MD-----------------------------------------------------------W-------------------------------------------------------------QS----------------------------E-----ELWAFLESLHPGDILSGSVAAIERFGVFVAL------------DGGVGFIVIPELSWRHIDAPTDVVQVD…
>non-CPR_non-CPR_Actinobacteria_NC_008578
-------------------------------------------------------------------------TTATDVRP----------------------------------------ETPEPPASSNDVTD-DFIAAIDKTI--KYFNDGDIVEGTVVKVDRDEVLLDI-GYKTEGVIPSRELSIKHDVDPHEVVKVGDRIEALVLQKEDKDGRLILSKKRAQYERAWGTIEQIKEADGVVTGTVIEVVKGGLILDI-GLRGFLPASLVEMRR------------VRDLAPYVGRKLEAKIIELDKNRNNVVLSRRAYLEQTQSEVRQTFLTTLKKGQIRNGVVSSIVNFGAFVDL------------GGVDGLVHVSELSWKHIDHPSEVVEVG…
>non-CPR_non-CPR_Actinobacteria_NC_014666
-------------------------------------------------------------------------TSTTDVRPVE-----------------------------T-------VTSPQSPTTPNDIAE-DFLAAVDKTI--KFFNDGDIVDGTIVKVDRDEVLLDI-GYKTEGVIPSRELSIKHDVDPHEVVAVGDHVEALVLQKEDKEGRLILSKKRAQYERAWGTIEKLKEEDGVVTGTVIEVVKGGLILDI-GLRGFLPASLVEMRR------------VRDLQPYVGRELEAKIIELDKNRNNVVLSRRAWLEQTQSEVRSEFLSQLAKGQIRKGVVSSIVNFGAFVDL------------GGVDGLVHVSELSWKHIDHPSEVVEVG…
>non-CPR_non-CPR_Actinobacteria_NC_013235
-------------------------------------------------------------------------------------------------------------------------MSISTVAAPNDIAE-DFLAAIDSTI--KYFNDGDIVEGTIVKVDRDEVLLDI-GYKTEGVIPSRELSIKHDVDPSEVVEIGEHVEALVLQKEDKEGRLILSKKRAQYERAWGTIEKIKEEDGVVSGTVIEVVKGGLILDI-GLRGFLPASLVEMRR------------VRDLQPYVGRQLDAKIIELDKNRNNVVLSRRQWLEQTQSEVRSEFLNQLGKGQVRKGVVSSIVNFGAFVDL------------GGVDGLVHVSELSWKHIDHPSEVVEVG…
>non-CPR_non-CPR_Actinobacteria_NZ_CP011502
-------------------------------------------------------------------------------------------------------------------------MSIAPSAAPNDIEE-DFLAAIDSTI--KYFNDGDIVDGTIVKVDRDEVLLDI-GYKTEGVIPSRELSIKHDVDPHEVVAVGDSVEALVLQKEDKEGRLILSKKRAQYERAWGDIEKIKAEDGVVEGTVIEVVKGGLIMDI-GLRGFLPASLVEMRR------------VRDLDPYIGQKLEAKIIELDKNRNNVVLSRRAWLEQTQSAVRQKFLDELKKGQVRKGVISSIVNFGAFVDL------------GGVDGLVHVSELSWKHIDHPNEVVQVG…
>non-CPR_non-CPR_Actinobacteria_NC_021064
-------------------------------------------------------------------------TSSTEASTSN------------------------------------PQQNAANTADGDDLPE-AFLAAVDATI--KYFNDGDIVSGTVVKVDRDEVLLDI-GYKTEGVIPSKELSIKHDVDPFEVVNVGDEIEALVQQKEDKEGRLILSKKRAQYERAWGTIEQIKEEDGVVTGTVIEVVKGGLIVDI-GLRGFLPASLVEMRR------------VRDLQPYVGQEIEAKIIELDKNRNNVVLSRRAWLEQTQSEVRQNFLHQLQKGQIRKGVVSSIVNFGAFVDL------------GGVDGLVHVSELSWKHIDHPSEVVEVG…
>non-CPR_non-CPR_Actinobacteria_NC_004572
---------------------------------------------------------------------------------------------------------------------------MK-----DELED-LLLSEIDKTV--KSFSDGDIVVGTVVRVYRDEVLVDV-GYKTEGVIPVKELSLRADVDPNELLEVGSTVEALVFQKEDSQGRLILSKKRAQYEKAWSDLEKIKDSDLTVTGKVIEIVRGGLIVDI-GLRGFLPASLIDIRR------------VRDLSSYLGMEIEAKVLELDRQRNNVVLSRRVLLEQNQSEARTSLFGNLHKGQVRKGTVSSIVSFGAFVDL------------GGIDGLVHISEISWKHVTQPSEVLKVG…
>non-CPR_non-CPR_Actinobacteria_NC_013947
-------------------------------------------------------------------------TSSIDA-----------------------------------------KSSTAAESGDDDLEE-ALLAAIDETI--KYFNDGDIVEGTVVKVDRDEVLLDI-GYKTEGVIPSRELSIKHDVDPAEVVSTGDQVEALVLQKEDKEGRLILSKKRAQYERAWGTIEKIKEEDGVVRGSVIEVVKGGLILDI-GLRGFLPASLVEMRR------------VRDLQPYVGRELEAKIIELDKNRNNVVLSRRSWLEQTQSEVRTEFLNKLAKGQVRKGVVSSIVNFGAFVDL------------GGVDGLVHVSELSWKHIDHPGEVVEVG…
>non-CPR_non-CPR_Actinobacteria_NC_013124
-------------------------------------------------------------------------TEEMASESA--------------------------------------SEHGAPAASDDDLEQ-GLEEAIAKSL--VEFDEGDIVSGLVVKVDKDEVLLDI-GYKSEGVIPLRELSIRKDVSPADVVSVGDRIDALVLQKEDREGRLVLSKKRAQFEKAWKEIEAIKARDGVVRGEVIEVVKGGLIVDI-GLRGFLPASHVDLRR------------VRDLAPFVGQDIEAKIIELDRGRNNVVLSRRAYLEENQRDQRERFLTSIRPGEVRKGVVSSIVHFGVFVDL------------GGMDGLVHVSELSWNHVDHPSSVVSVG…
>non-CPR_non-CPR_Actinobacteria_NZ_CP007287
-------------------------------------------------------------------------------------------------------------------------MAENKKEVPNDIEE-DFIKAVDSTI--KNFEDGDLVEGTVVKIDHDEVLLDI-GYKTEGVIPSRELSIKKDVDPDDVVQVGDTIEALVVTKEDKEGRLILSKKRAQYERAWGDIEKIKDADGIVEGTVIEAVKGGLIVDI-GLRGFLPASLVEMRR------------VRDLSPYIGQKIKAKILELDKNRNNVVLSRRQYLEETQSEVRETFMAQLKKGQIREGTVSSIVNFGAFVDL------------GGVDGLIHVSELSWKHIDHPSEVVKVG…
>non-CPR_non-CPR_Actinobacteria_NC_008148
---------------------------------------------------------------------------------------------------------------------------MTETSNSRDFEE-EIVPVDESVL--IDFQDGDIVEGEVVRIDKDEVLVDI-GYKSEGLIPANELTIRKGADPKDVVELGQRIEALVLQKEDADGRLILSAKRAAFERAWNKIEEAYREQRNVEGPVIEVVKGGLILDI-GLRGFLPASLVDIRR------------VRNLEEYLGRRLECKVIELNRSRNNVVLSRRAVLEEERKEERERILNSLNEGDIVKGTVSNLVDFGAFVDL------------DGIDGLIHISELSWNHVDHPSEVVQVG…
>non-CPR_non-CPR_Actinobacteria_NC_013739
---------------------------------------------------------------------------------------------------------------------------MSDVQP-DGL-E-QIVPNYDATL--TPFEEGDVVTGHVVRIDKDEVLVDI-GYKSEGVIPSNELSIRKSVDPKDEVEMGEEVDALVLTKEDQDGRLILSKKRARFEKAWRRIEAAAESGEPVDGTVIEVVKGGLIIDL-GVRGFLPASLVDIRR------------VPHLDEYLGQTIECRVIELNRSRNNVVLSRRAVLEEQRREDRERILDRLQPGMIVEGTISNIVDFGAFVDL------------DGIDGLIHISELSWSHVNHPSEILSIG…
>non-CPR_non-CPR_Actinobacteria_NZ_CP011402
---------------------------------------------------------------------------------------------------------------------------MTEIKNPFEDDE-QMNAMIDGTL--TDFDEGDLVDGTVVKIEHDEVLVDI-GFKSEGVIPSRELSIRKDADPSDIVNMGDKIEALVLQKEDKDGRLILSKKRAEYERAWISVEEKFKAGETVTGEVIEVVKGGLILDI-GLRGFLPASLVDLRR------------VKDLDMYLGTSLEARVIEMDRNRNNVVLSRRVLLEEGRKNERAEILSRLSKGMRLKGTVSSIVDFGAFVDL------------GGIDGLVHISELSWSHVNHPSEVVKVG…
>non-CPR_non-CPR_Actinobacteria_NC_015389
---------------------------------------------------------------------------------------------------------------------------MSEIQNSLDDEE-EMNSLIDGTI--TDFDEGDLVSGTVVKIEHDEVLVDI-GFKSEGVIPVRELSIRKDADPSELVSVGDPIEALVLQKEDKDGRLVLSKKRAEYERAWNRIEEKFNTGENVEGEVIEVVKGGLILDI-GLRGFLPASLVDLRR------------VKDLTSYMGTSIEARVIEMDRNRNNVVLSRRVVLEESRKAERSEILSKLKSGMRLTGTVSSIVDFGAFVDL------------GGIDGLIHISELSWNHVNHPSEVVKVG…
>non-CPR_non-CPR_Actinobacteria_NC_013203
---------------------------------------------------------------------------------------------------------------------------MSEIQNSLDEDE-EMNSLIDGTV--TDFDEGDLVNGTVVKIERDEVLVDI-GYKSEGVIPARELSIRKDVNPAEIISLGEDVEALVLQKEDKEGRLVLSKKRAEYERAWKAVEDKFNAGETVEGEVIEVVKGGLILDI-GLRGFLPASLVDLRR------------VKDLGAFMGTRIEARVIEMDRNRNNVVLSRRIVLEEARKAERQDILGKLQVGMKLKGTVSSIVEFGAFVDL------------GGIDGLVHISELSWNHVNHPSEVVKVG…
>non-CPR_non-CPR_Actinobacteria_NZ_LT821227
---------------------------------------------------------------------------------------------------------------------------MTEIKNTYQDDE-DFANLIDGSI--SSFDEGDLVNGKVVKIEHDEVLVDI-GFKSEGVIPARELSIRKDVDPASCVQLGDEIQALVLTKEDKDGRLVLSKKRAEYEVAWKQVEEKFKAGEIVTGEVIEVVKGGLIVDI-GLRGFLPASLVDIRR------------VRELDSYLGTEVDARIIEMDRNRNNVVLSRRVLLEEGRKAERAEILSKLSKGMRLKGTVSSIVEFGAFVDL------------GGIDGLVHISELSWNHVNHPSEVVSVG…
>non-CPR_non-CPR_Fusobacteria_NC_014632
---------------------------------------------------------------------------------------------------------------------------M-----D---ND-EFEALLNDYL--DEEETGKKVKGILSQVDRNYTYLDV-VGQATARVRTEELEG---------YEEGDEVEILLMGETKDGDFLIGSRRKIDMEENWEKLVKAFENKDIVKGKIAKRVKGGYVVNILFQQAFLPNSLSEI---P----------MKDGDKFVGSDIEVMIKKEDRRGKKILVSKKDILK-----EQGEFFNKLNLGDVMEVEVKNILDFGISVRV------------GKSNGFIHISELSWGKVDKISDIYKTG…
>non-CPR_non-CPR_Fusobacteria_NZ_CP011280
----------MS----------------------------------------------------------------------------------------------------K-E--NYF--SMS---------E-QLLN--D-YL--GDYKSGAVVEATITRKDVDYSFLDI-SSKLEGRIRSFEISD---------LNVGDKVSVQVIRTE--EDFVIVSKLALDRVRELE-----YNVSDVVSGTVIKQIKGGYNVKVKNVNAFLPLSLSGAKG---------N-------EIVGKTFDFLIKEKTKK--GITLSRTDLAR-----EVLDFINTLQLGDVVKAKVKEILDFGAILEL------------GPTTGLLHISELSWGQTKDIKSVLSVG…
>non-CPR_non-CPR_Fusobacteria_NC_013515
---------------------------------------------------------------------------------------------------------------------------M---------NN-NFMEMLEEYLPTKEQNLGDKIEGTIIRKDNEFGYLNI-QNKLEGRIRVSEIEG---------FEIGDKVKVLVVK-EN-DEFLIVSKNILEKKEAFS-----IKKGDKISGIIKEKIKGGYKVEC-GIKAFLPFRSLNQQY------------IPN-----GELLEFDVTEKNRK--EIVISRLEIIKE----NEKNFLNKLNLGDKITGTISNKLDYGMIIDL------------GTLSGLLHSSEISWNKEKTLKD-FTVG…
>non-CPR_non-CPR_Fusobacteria_NC_013517
---------------------------------------------------------------------------------------------------------------------------M----------N-EF-ELLNEYL--EEKKKGELIEGIILRKEKDFSYLDV-NDKLEGKIYTNEIEN---------LNVGEVVEVKIIR--ND-GEIIVSKFLLDKEKEFA-----YETGDIIQGEIIEKIKGGYKVKL-GNIGFLPFSISNLRR-------------DD--EYKNKKFKFLIIDKDTK--NLTLSRSDLVK-----EEEDFYQTVQKGDVLEGTIKEILDFGLIVDL------------GKTTGFIHISEVDWSSVKDLKHLFNAN…
>non-CPR_non-CPR_Fusobacteria_NC_013192
---------------------------------------------------------------------------------------------------------------------------M---------DEREF-ELLEDYL--EEKKSGDVVEGVITRKELDYGFLDL-NAKKEGRIYAHEVQD---------FEIGDKIEVKVLREDDDN--IIVSKFMLDKAKELA-----FNVDDIVTGEISRKIKGGYTVKI-GNEAFLPFSLARF---------------EKDKDYTGQKFKFLIREKNKS--NITISRSDLIK-----EEEKYFESVNIGDIVTGKVKEVFDFGIILDL------------GAASGFIHISEVSWEQVDNLTEKYKKG…
>non-CPR_non-CPR_Synergistetes_NC_018024
----------MVEEE----------------------------------------------------------------KREG-----QQEIG--------------LPPAQE-N-QE----TM----------E-ELITQH--GL--ENVHRGKVVEGVIIDSTDDGWLVDI-GFKCEGFLPKREWTHRILVDDDSDPSVGDRVRAEVTRVHGEESQVLLSRWRLLFDERWNDLENALKSNETIKVVGLRKVKGGLVVNAYGLEGFIPISHLAEEG-----------KMINPSKFINQEIEVKLLEKDRRKRRLIFSRRLILEQEMANRKKEFFENVKAGDILEGVVTSITSFGVFVDL------------GPIEGLVHISELSWSKNVKPRDIVKKG…
>non-CPR_non-CPR_Synergistetes_NC_014011
----------MME-----------------------------------------------------------------------------EMNN-------------VKTTENFE-NM----DM----------E-SMLEKY--AG--EEIHKGKVVTGTIVGANEDGWLVDV-GYKCEGFLPRREWTHKILVEEEEEPSINDEIQVQVINIHGEDAQLLVSRWRCEFDRRWAELESFVSSHDLISVRGIRKVKGGLMVNCFNLEGFIPISHLAEEG-----------RGVNPGKFVGEVFDVKLLEKDRRKRRLVLSRRMLVEEAVEEQRNKFYTTVSEGDILEGRVSSITSFGAFINL------------GPIDGLVHISELSWKRNVKPKEVVKKG…
>non-CPR_non-CPR_Synergistetes_NC_016148
----------MMDEN----------------------------------------------------------------KQNK-----ENEMSNNK---DT------APKPQE-N-EE----TM----------E-NIFEQY--IA--DDIRRGKVVEGVIVDATDGGWLVDV-GFKVEGFLPKNEWSQGILVEEKETPQKGETVTVKVVSIHGEESQLIVSRWRCEFDRRWNELEKHLEQSDIVTVKGLRKVKGGLIVDCLGLEGFIPISHTSEEG-----------KSVNLSKLVGGTFDAKVIEKDRRKRRLVLSRRVILEEERSKLLDEFYGKVSEGDVVEGTVSTVTSFGAFVDL------------GPIEGLIHNSELSWQKNVNPRDVVSKG…
>non-CPR_non-CPR_Synergistetes_NC_013522
----------MVD-----------------------------------------------------------------------------GLT--------------SGVSEP-E-PE----TM----------E-SIMEQID-S---VNIHRGSVVEGTVVDAREDGWLVDV-GYKCEGFLPRREWSHRAIVEKVGEPQVGDRIRVQVTNVQGEEAQLNLSRWRCEFDERWNALEEKLAQSDVIEVEGIRKVKGGLIVDCCGLEGFIPISHLAEEG-----------RGINPANLVGKTFPVKLVEKDRRKRRLVLSRRSILDEEMASLREEFYANVHEGDILEGEVSSITSFGVFVNL------------GAMEGLVHITELSWQRGAKAKDLVQKG…
>non-CPR_non-CPR_Synergistetes_NZ_CP016757
----------MVD-----------------------------------------------------------------------------ELR--------------VMETQE-K-EE----TM----------E-EMMQQYD-VM--GDFHRGKVVEGTVVDSREDGWLVDV-GYKCEGFLPRKEWTHRVLVEETPEPENGAKVRVQITNIQGEDAQLGLSRWRCEFDERWNKLEEEAENNETITVKGIRKVKGGLIVSCCGIEGFIPISHLTQEG-----------HGVNPGKLLDQEFSVKLIEKDRRKRRLVFSRRSLIEEELTGIRQAFYEQVHEGDVLEGDVSSITSFGVFVNL------------GAMEGLVHISELSWQRSAKAKEIVAKG…
>non-CPR_non-CPR_Deinococcus-Thermus_NC_014761
----------MEDKEPKTPA---------------------------------------------------EAGTETPETQAPEAQAEAKEAA-------------------AAEPAPEP--TM----------E-QALQEAESRL-GAKVRRGQVLTGRVVFVGSEGVAVDV-GAKVEGIIPFNQLTEEPLEELKKMLKPGDEVEVYVVRVDLPNNVIILSKKRAEADKAWRKIVELAEKGEPVEVTVREKVRGGLVAYLEGVRAFIPASQVDIKR------------VAELDEFVGQTIPVKITEINRKKGRVILSRRVLLEEDQKKKRAEVLEGLEPGAEVEGKVVEVTDFGAFVNL------------GAIDGLIHRSELSWGRFEHPREVVKVG…
>non-CPR_non-CPR_Deinococcus-Thermus_NC_015387
----------MEDKDTQTPA---------------------------------------------------EAGNQAHENQTP-----------------------------S-E-------TM----------E-QALEEASARL-EREIRRGQLIKGTVVFVGNEGVAVDV-GAKVEGIIPFNQLTDEPLEELKNLLQPGDEVEVYVVRVDLSENAIVLSKKRADADKAWRKVVELYENGEPVEVTIREKVRGGLVTYIEGLRAFLPASQVDIKR------------VNDLDGFVGQTLPVKIIELSRKKGRIILSRRVLLEEEQKRLRQQVLQSLEPGQEVEGAVVEVTEFGVFVNL------------GHIDGLVHRSELTWGRFEHPREVVQVG…
>non-CPR_non-CPR_Deinococcus-Thermus_NC_014974
----------MEEKATQVS-----------------------------------------------------------------------------------------------E-ALTP--SM----------E-EALQETEARL-EKRVRPGQILTGKVVLVGSEGVAVDI-GAKTEGIIPFNELTEKSLEELKALLKPGDLVRVQVIKVDPETGQVLLSRKRVEATEHWDRIRELYEKGEPVTVTVKEKVKGGVVADLDGVSAFIPASQLDLKR------------IPNLDAYVGQQILVKIIEFNRKKGRVLLSRRAVLEEEQKRAKEAFFQSLQPGQVVEGTVVDVTDFGAFVNL------------GPVDGLVHRSEITWGRFNHPKEVIHKG…
>non-CPR_non-CPR_Deinococcus-Thermus_NC_014212
----------MEDKATQTPV---------------------ETT---------------------------PPKPEVSASEAP----KAEHMA-------------------T-ETAAAP--LM----------E-QALQDAEARL-EKTVQRGQILQGTVVFVGHEGVAVDI-GARTEGIIPFNQLSEENLEELKKLLKPGDTVTVYVVRADLENGQIILSKKRAETDRSWVKIQELFDRAEPVMVTVKEKVKGGLVAFVEGVRAFLPASQVDLKR------------TPELDEYVGQSFPVKIIELNRKKGRVILSRRAVVEEEQKSLRAKLLSQLKPDDVVEGQVVEVTEFGVFVAL------------GGVDGLVHRSEITWGRFTHPKEVIQKG…
>non-CPR_non-CPR_Deinococcus-Thermus_NC_013946
----------MEDQATQTPV----------------------------------------------------------ETGKEP---QA---------------------------------SM----------E-QALQDAEARL-EKTVQRGQIVTGTVVLVTNDGVMVDI-GARTEAVIPFNQLTEENLEELKNLLKPGDTVTAYVVRADLENGQVVLSKKRAEADQSWVKIQALYEQGEPVMVQVKEKVKGGLVATIEGLRAFLPASQVDLKR------------TPDLDEYVGQSFLVKIIELNRKKGRIILSRRTVLEAEQKAARSQVLASLKEGEVVEGQVVEVTDFGVFVAL------------GGVDGLVHRSEITWGRFNHPRDVVQKG…
>non-CPR_non-CPR_Deinococcus-Thermus_NC_014958
----------MEDQATPTPATAPET-------------------------------------------------------------------------------------TGA-E--DYP--TM----------E-DVLASEAPEI--REVNRGDVLTGTIVFIGNEGLMVDV-GAKVEGLIPFNQLADEPLEQAQEQYKPGDQIEAYVVRSDLANGQIVLSKKRADQDKGWRVLADMQAKDEPFQVDIIEKVRGGLVAQIDGIRAFLPASQVDTRR------------VNDLDPYVGKPLEVKLIELNRKRNRVIISHRAIMEAKKAQAREETMHTLEPGAKFEGEVVEITDFGVFVNL------------GGIDGLVHRSELTFGRFNHPRDVVKVG…
>non-CPR_non-CPR_Deinococcus-Thermus_NC_012526
----------MEDN-TQTPAGIPTT----------------DT---------------------------------------------TKPVAAP-------------AAQSE-E--EYP--TM----------E-DILASEAQEH--QSVSRGDIVDGTIVFIGQDGIAVDI-GAKVEGVIPLNQIGDEPVEQAQEMYKAGDTIEAYVVRVDLPNSQIVLSKKRADQDKGWRVLEKMQEADEAFEVDVLEKVRGGLVAQVEGIRAFLPASQVDTRR------------VNDLDPYVGKPLQVKLIELNRKRNRVIISHRAIMEAQKAKAREATVGQLEAGAQFEGEVVEITDFGVFVNL------------GGIDGLVHRSELTYGRFNHPRDVVKVG…
>non-CPR_non-CPR_Deinococcus-Thermus_NZ_CP011387
----------MEDN-TQTPAGTPTT----------------EAMDTAAM----------------------QADTATTAPEAAPA---AEVVAAP------------AAPQAE-E--EYP--TM----------E-DILASEAQEP--QSVSRGDIVDGTVVFIGQDGIAVDI-GAKVEGVIPLNQIGEEPVEQAQELYKSGDKIEAYVVRVDLPNSQIVLSKKRADQDKGWRVLEKMEAENEAFEVDVLEKVRGGLVAQVEGIRAFLPASQVDTRR------------VNDLDPFVGHPLMVKLIELNRKRNRVIISHRAIMEAQKAKAREATVGQLEAGAQFEGEVVEITDFGVFVNL------------GGIDGLVHRSELTYGRFNHPRDVVKVG…
>non-CPR_non-CPR_Deinococcus-Thermus_NC_001263
MGAFPGGQEFMEDN-TQTPAGTPTT----------------TSTQQAEG----------------------DQETQSHQAQTEQAQARQQEQAAK-------------TQAQE-E--DYP--TM----------E-DILAAEAQEP--QSVTRGDIVDGTVVFIGQEGIAVDI-GAKVEGVIPLNQLGEEPVEQAQEMYKPGDAIEAYVVRVDLPNSQIVLSKKRAEQDKGWRVLERMQEADEAFEVEVLEKVRGGLVAQVEGIRAFLPASQVDTRR------------VNDLDPYVGKPLMVKLIELNRKRNRVIISHRAIMEAEKAKAREATVGQLEPGAVFEGEVVEITDFGVFVNL------------GGIDGLVHRSELTYGRFNHPRDVVKVG…
>non-CPR_non-CPR_Deinococcus-Thermus_NC_015161
----------MEDK-TQTPAGMPDQ----------------E--------------------------------TATQSEQAQPAQ--PQ------------------AAQTE-E--DYP--TM----------E-DVLASEAQEP--QNVNRGDIVDGTVVFIGSEGIAVDI-GAKVEGIVPLTQLGDEPMEEAQAQYKPGDSITTYVVRVDTNTGQIVLSKKRADQNKGWRVLEKMQEEGQTFEVEVLEKVRGGLVAQVEGIRAFLPASQVDTRR------------VNDLDPYVGKPLQVQLIELNRKRNRVIISHRSILDAQKEQAKQETMTHLESGAEFEGTVVEITDFGVFVNL------------GGIDGLVHRSELTYGRFNHPREVVAVG…
>non-CPR_non-CPR_Deinococcus-Thermus_NC_014221
MAAL------MTDEPTQTDA--PDV----------------ETR---------------------------AAPEAADAPETPP----AESVD--------------KSTDSS-ETADAE--TM----------E-EVMAASDEQLARKPIHRGMITTGTVIMLSQEGLVVDV-GQKVEGLVPYNQLFEFEVAEAAKYFKPGDELQVYAVRVDIPNSTIILSKKRADQERAWNLLQDIYDKKLPVEVEIVEKVRGGLVANL-GVRAFLPASQVDVRR------------VNDLSPYVGKRLKVRIIELNRRRNRVIISRRSILEEELAEQKAETLKKLEPGARLEGEVVEITDFGAFVNL------------GGIDGLVHRSEITHGRFNHPREVLEVG…
>non-CPR_non-CPR_Thermotogae_NC_011978
---------------------------------------------------------------------------------------------------------------------------M-----E---ED-EILNQYE--P--GEFRRGQIVKGTVIGKEEDGIVVDF-GGKSEGFVPEGELIRP-----MDDYKIGEELTLQILNLNYEE--STLSEKRPIFRKTMEELRKLYEEGKPVKARIVSQAKGGYNVVLKGVPAFLPGSHSLLKR-------------EE--PFPREEIEVLILDMAHTRRRIVVSRKAIQE--R--KVDEFFSEKKTGDVVECTVRRINPSGIEVEV------------SGIRGFIPRSELSYDTRITPEDVVQVG…
>non-CPR_non-CPR_Thermotogae_NC_000853
---------------------------------------------------------------------------------------------------------------------------M-----E---ED-EILSQYE--P--EEFRRGQIVKGVVIGKEDDGVVVDF-GGKSEGFVPENELIKS-----LDEYKVGENLTLQILNLNYEE--SILSERRPVLRKTLEELRKDYEEKKPVKARIVSQTKGGYNVLLKGVSAFLPGSHSLLRR-------------ND--PMPEKEIEVIILEMAQTRRRIVVSRRALQD--K--KIEEFFSEKKVGDIVEGTVKGISNAGVEVEI------------SGVRGFIPRSELSYDTRISPEDIVKPG…
>non-CPR_non-CPR_Thermotogae_NC_009828
----------MT----------------------------------------------------------------------------------------------------D-E-HE----KM----------E-NFQEYLD--F--VETNPGSVVEAVVTRINPEGISVDF-GGKGEGIIQQNELIHS-----IEKYSVGQKIKAQILKINDEEGYALLSEKRPYIREMRNTLRKAYESKIPVKGKIVQTIPGGYRVLISNFDAFLPGSQSLLKR-------------NQ--SFQEKEMNFLIIEYSVRRNHIVVSRKALLERL----KKEFFNTHKVGDEIEGTVESIRMNHAIIDF------------DGIKAFLPRSEMSHDPSVSPDDILKKN…
>non-CPR_non-CPR_Thermotogae_NZ_AP014510
----------MS----------------------------------------------------------------------------------------------------E-K-NE----KM----------E-NFQEYLD--F--VENTPGQVVEATVTRINPEGISVDF-GGKGEGMIPQTELVNP-----ATNYTVGQKIKAQILKINDEEGYAVLSEKRPYAREMRNQLKKAYESKTPIKGRITQAVPGGYQVTIYGFDAFLPGSQSMLRR-------------EQ--PIPDKEMDFLVTEYSVDRKRIVVSRRALIDQM----KEEFFKAHKVGDQIEGAVEQITDTHAIINF------------GVVKAFLPKSEISHDPSLSVKDVIKKG…
>non-CPR_non-CPR_Thermotogae_NZ_CP007141
----------ME----------------------------------------------------------------------------------------------------K-E-NA----SM----------K-DFEKYLD--L--AGFGPGQVVEATVTGVDPEGLSVDF-GGKQEGRIQPSELVRE-----PSSYKVGEKITAQILKINDEEGYAMLSELRPHRRMAERKVREAKDSGTPVKGYFVQQVSGGYIVKLFNLDAFLPGSESLLRR-------------DA--EIPQGEHDFLIIDYTAGRRRIVVSRKALVERQ----IQTFFESHKVGDVVEAKVERVRSSGATLKI------------GPLTATLPREEVSHDPSVSIHDALKEG…
>non-CPR_non-CPR_Thermotogae_NC_015707
----------M-----------------------------------------------------------------------------------------------------DIK-------GM----------E-DFEKYLD--W--IEVRPGQTVEGTITRISPEGIYVDC-KAKSEGFVPIDELVFP-----LENYKVGQKLKLQVLKIGGEEESITLSEKKPYARMIRSRILEAYEKGETVKGKIVDQIQGGYRVLLYNIEAFLPGSHSMIKR-------------EE--PIPQEELDFLIVECEFGKRRLVVSRKAILEKQ----KKEFFSTHKVGDVVEGIVEKVTDSHALLNI------------NSISAILPRSEVSHDKKLDPTDVLKKN…
>non-CPR_non-CPR_Thermotogae_NC_012785
----------M-----------------------------------------------------------------------------EEKYN----------------GQNE-E-NL----SM----------E-DILKQMDE----VDERRGRSKTAEVHSIQPDGLLVIL-EGKLDGFAPESELVKP-----LKEYNIGDKIEVQIMKVDEDEGRSVVSEKRIYFRTALKKVENAYKSGEPVTGTILGETKGGYNVKLLNVPAFLPGSQSGIRR-------------GR--PIPEGEQEFKVINFRKKKRNIVVSLTAFKEEK----VKAYFEALETGSTVEGTIESIKDFGAFVRL------------TEVVGLIPASEVSWDPSQKVHDVLNVG…
>non-CPR_non-CPR_Thermotogae_NZ_CP011232
----------MD------------------------------------------------------------------------------EVR----------------KNNE-E-NL----SM----------D-EIFESMDD----FSMRRGSVKEAEVYSLQPDGLLVLF-DGKLDGFVPESELVHP-----LKEYKIGDKIKVTILKVNEEEGRSTASEIRVFRRDALKTVENKFKNNETIQGKIVAKVSSGYNVRLLNIDAFLPGSHSGLRI-------------DD--EIPEESLDFKIIAFRRSRRRIVVSLKELKEQR----IKAYFDSIKEGYMITGTVESIKKFGAFVKL------------TDITGLIPASEVSWDSSVRIEDVLKLG…
>non-CPR_non-CPR_Thermotogae_NC_017934
----------M-----------------------------------------------------------------------------EEKMN-----------------RQD-E-NL----SM----------E-EIFEQMD--V--SSARKGSRKDAEVFSIQPDGLMVIM-DGKLDGFVPADQLVNE-----LEEYNVGDKIEVMVIKTNEEEGRSTVSEKRVHARQAVSKVEKAYREGKAIDGKIVSETKAGYNVRLVKVPAFLPGSESGIRK-------------GD--PAPEGTLKFKVIRFKRQRNNVVVSLRAFQEEA----IKAYFETIEVGQELEGTVESIKNFGAFVKL------------NNVTALIPASEMSWDPSVRISDLLKPG…
>non-CPR_non-CPR_Thermotogae_NC_016751
--------------------------------------------------------------------------------------------------------------MVE-D-KN----EF----------E-KMLDEVS--E--FHIKKGETLTGEIISISSDGVYVSA-PGKADVYVGKDYLLKN-----IDEYKKGEKIKVKLLKINDAEGQAFGSEKAAKKDEIIDEI----VEGKVVKGKIKERVEKGYIVELENVRAFLPGSLAMLNP-------------NE--PFPREEMDFLVIKREERRRNIVVSRKGLVDKY----IEEFFNTHNLNTLVEGVVTGIKEFGLFISL------------NYITALVPKSEISWDKKVDINEMYKIG…
>non-CPR_non-CPR_Thermotogae_NZ_LN824141
----------M-------------------------------------------------------------------------------------------------------E-KQ----SF----------E-ELMEDLE--I--IELKKGRIFEGKVFEIDNDGIWVALEGSPGDVFVTQDELLRS-----KRDYKIGDLITIKITKVNDAEGLHLASEKKAV----WQKLFNDIKEGENYKAVFKERVKNGYTVLIEGVKAFLPGSLSLLKI-------------YE--DMPSEEVGVKVI--SKKGRNIVVSRKDYIEEK----IEVFFGNYKKGMLVEGIVEEVKDFGAFVRL------------SYVTAFLPKNEVSWNSRMDLKEFLKIG…
>non-CPR_non-CPR_Thermotogae_NC_010003
M---------M-------------------------------------------------------------------------------------------------------E-EK----TF----------E-KLLNEQE--I--NEVKKGKIIEGKVFEINSDGIWVALEGATGDVFVSQVELIKP-----LQEYQVDQKILVEITKTNDAEGLNFASEKRAV----WNETMNKINEGENYPIIFKNRLKKGYSVLIEGIGAFLPGSLSLLSP-------------KD--DLPQGEKMAKVI--SKNGKNIVVSIKDYAEEK----ISQTFNEYEEGMVIDGVVEDIKNFGAFVRL------------NHLNGLIPASEVSWDEKISIKDYLKVG…
>non-CPR_non-CPR_Dictyoglomi_NC_011297
---------------------------------------------------------------------------------------------------------------------------M----------E-ELSDKLEETL---SISIDTLVYGNILNITKDGLWLDI-GKKYDAFLPYNELSKELKAKLEKK-QEIDSIPVVIKHVNYKDGVITVSNKKAVENKIWEELLWAYENNQPIQGKVINYNGRGFILEINNVEGFIPAKEIDVPP------------IKPPKYYINRRIEGKIKRINPEKNQLIISARELLEQKQEEERSNLWEKIKNSQIVRGRIIKVDEDKLTVDL------------GGIIGIVEKDEISWFPIKNIRRYYNTG…
>non-CPR_non-CPR_Caldiserica_NC_017096
----------MEEKNFYEN-----------------------------------------------------PNDIESILTKAA----SEKLP-----------------QSKEEV-EE---TIKE---E---KENEVQKQQNETM--KSFKKGDIITVTVVKVDANGAYVNA-GTKEDVFIPLKGLTNKQVNSASDVVRVGDKINVMVLR---DGPNLVLSKKLADNIKKYEDLKKKMENEEKVKAKVEKLIKGGLLLDIDGVSAFLPQSQVGLKK------------GESLDSSIGKEIEVYLIEVDPKVKRVIASRLKVLQEEKEQLRKQTLVNLKKGEIYEGTVKAIQDFGVFVDI------------GGVEGLIRINELTWGRRKDPHEVVKVG…
>non-CPR_non-CPR_Aquificae_NZ_AP013035
----------M---------------------------------------------------------------------------------------------------EER-R-ET----NM----------E-DMEALYEESL--KEIRPGQIIKGKVVAITNGEVLVDV-GYKAEGIIPKAEFDEE--------PAIGDEIDVFVRSLSGESG-IRLSKREADRRKRWQQIQEAFEKGEYVKGTVVGRVKGGYKVDLGGFEAFMPQSQSDLKP------------LEDPDELVGQASSFKILDIKTGGKNIIVSRRAWLEEEWEREKQAFWDRMVEGKVIEGQVKKIMDYGAFVDL------------GPATGFLHISDISWGRINHPSDVLKEG…
>non-CPR_non-CPR_Aquificae_NC_000918
---------------------------------------------------------------------------------------------------------------------------M---------EE-KLLEE-SASP--EEFKRGQVVKGRVVKVAGDTVFVDI-GYKTEAVISKEEVPE---------VQEGQEIEAVLVRFSPRIPNPVLSVKPLQEKKELEKLKEAYLNKSDVVGKIEKKVKGGFIVDFEGVKAFLPMSQAGKKL-------------KE-----GQVLTFKVLKLDSKRPQIIVSHKAYLDEQREKRKQELLNTLKPGDVVEGKVVKIDPNGVTLVI------------EGLRAFLPKEELSWGRDKNPYNYTDVG…
>non-CPR_non-CPR_Aquificae_NC_013894
---------------------------------------------------------------------------------------------------------------------------M---------EE-KLLE--DGEV--RELRRGDVVKGRVVKLDERNAYVDI-GFKVEGIVPREELPET--------IKEGDEIKAVFVRFT-KAGSPILSYQRYVKDRLISFLKNAFEKGKFVEGKVEEKTEEGFVVNISGLKAFLPKEDARKGL------------------KVGSRVVAKIKQLVQEGKKVVLSEREYLEVRKEAKKERLLKRLKEGDVIWGRVIKIDPEGITLLV------------QGLRAFLPKEELSWGRDKNPYNYAEVG…
>non-CPR_non-CPR_Aquificae_NC_013799
---------------------------------------------------------------------------------------------------------------------------M---------EE-KLLEK-SEEA--REIRRGEIIRCKVIKVDERNIYVDV-GYKVEGIIPREEIPDA---------KEGDEIKAVVTKIS-RGGSPILSYRKYIEERYIHFLRSAYEKGRFLTGRIKDKTEEGYTVDINGITAFMPLGEAGRKL-------------RE-----GSKVVVKITDFQSTKEKLKVSQRAYLAQQEKRKKERLIAKLKVGEVVEGRVIKIDPEGITLLV------------QGLRAFLPKEELSWGRDKNPYNYAEID…
>non-CPR_non-CPR_Aquificae_NC_012440
---------------------------------------------------------------------------------------------------------------------------M----------ESEFEKLLEESI--PYYSKGERVTGVIVRIQDDYAFVDV-GQKTEVVIDKNEING---------LSEGDQITAVYLGRRNKDGYLVISRRPLIFSEALQRVEDAFSKGEKIGAKLDKKINKGFLVDLGGVKAFLPYSESGLRR---------D---EE---LPPPEFDVYILRIDRDRKGIVVSRKKVLDEEIKRKRDEIFSLLEEGKQVRGRVEKVQENGAVLSL------------ERVFGFLPRSLYSWDRDRSISE-LSVG…
>non-CPR_non-CPR_Aquificae_NC_012438
---------------------------------------------------------------------------------------------------------------------------M----------N-EFEKLMEES---KEYSKNQKIKGKVVKVTEDKVFVDI-GQKIEAVLNRNEDQD---------VEEGQEIEAVFTGKRDKDGYFILSRRGIVNKEKLQKLKDAFENKKKVKATILSKQDKGYTVSVEGFRGFMPLSESSLKR---------D---ENLPE--GFTFEAYIVKFEERGRNIVISRKQALIEEKELEKEKILSLLKEGQKVKAKVVKVQPNGAVLSI------------EDLYGFLPKSEISWDKSRKVEEVLKVG…
>non-CPR_non-CPR_Gemmatimonadetes_NZ_CP011454
-S--TEVE--AED---------------DAPLYGKL--------------------------------------TAREKRDLQ-----KSQLRPLAPELYE--------EDEF-T-SD----EY----------E-RMLELYNGTL--ASIEEGEIVKATVLEIRENLVVLDI-GFKSEGTIPLEEFKDM---P---ELKAGDEVEVLLEHLEDQEGSVVLSKKKADFMRVWERIRVAYESDMPVEGTLVKKIKGGVVVDLMGVDAFLPGSQIALRR------------VPNIDELLGQKYEFKIIKLNKRRRNIVVSRRVILETERAGKREKLMKELSKDQVRKGVVKNITDFGAFIDL------------GGVDGLLHITDMSWGRISHPSEMVQIG…
>non-CPR_non-CPR_Fibrobacteres_NC_017448
----------MSQ---------------NLKFG---------------------------------------------------------------EDLEEIL----AAQGEC-S-P-----DF----------R-KANADVYAGM--GYLEQGKLVTGKISQVNDQEVLVDV-NYKSEGVIDRAEFKDT---D---SLELGSEIEVFVEKLEDEDGRLILSKQKADFVRVWDRIHAAFENNEVVRGTLTKRIKGGVVVDLFGIDAFLPGSQIDLRQ------------IPDINALIGQEFDLKVIKVNKARRNIVVSRRVVLEEERNKQRGDVLETLEKNQVRKGIVKNITDFGAFIDL------------GGVDGLLHITDMSYKRINHPSEMLQLG…
>non-CPR_non-CPR_Calditrichaeota_NZ_CP018099
----------MTEEKKE-----PTTNPSQEQATEEMAN---------------------------------NDQPQDQKDQTT-----DDQFTEEVEDLEE--------EMEY-S-PA----EM----------E-TLTRLYNQTL--DELKEGEVVTGRVLSITDNDVIVDV-GFKSEGIIPKEEFDNI---E---ELKPGDEIEVYVDELDNGEGMVALSRRRADFIKNWERLIEKYENDEVIPGTITRRIKGGMVVNLMGVDAFLPGSQIDVKP------------IRDFDALIGKQMNFKIVKVNRARKNIVVSSRALIEKELEGKRKEILETLEKGQVRKGIVKNITDFGVFIDL------------GGVDGLLHITDLSWGRVNHPSELVKLD…
>non-CPR_non-CPR_Ignavibacteriae_NC_018178
----------MSD---------------KQEKV-------------------------------------------------------QNQLD----NVKFI------NPEEY-T-EE----EL----------Q-TLTKLYSESF--RDIKEDEIIQGTIVGIHGDNVVIDV-GYKTDGTIPKSEFSAT---E---EIKIGNKVDIVIESFEDEDGNLVLSKKRADFLKVWSRVLKAYENDEVIQGKILKRIKGGMVVDLMGIEAFLPGSQIDIRP------------VRDFDAFVGQTMDFKIVKVNIPTENIVVSHKVLIEETISDQRKEILDKLEKGQILEGIVKAITDFGVFVDL------------GGVDGLIHITDLSWGRINHPSEVVKLD…
>non-CPR_non-CPR_Ignavibacteriae_NC_017464
----------MSQ---------------TKETT-------------------------------------------------------LNTLTPDEAKVKF-------NHDQY-S-NE----EF----------E-TLAKLYSESF--RDVKEGELVRGKIVRVQGDNVIVDI-GFKSEGTIPKSEFPAD---S---EIKVGQEVEVVLESVEDQDGNLVLSKQRADFLRIWERVINAAKTGEVLQGKIIKRIKGGMVVDLMGMEAFLPGSQIDVKP------------IRDFDAFVGQTKDFRVVKVNEPTENVVVSHKVLIEEEMKDQRAAILQSLEKGQILEGTVKAITDFGVFVDL------------GGVDGLIHITDLSWGRINHPNEVVKLD…
>non-CPR_non-CPR_Bacteroidetes_NC_013501
----------MAEQKQEQ-A--PETEKPQEEAPQPEAEAQPET------VAEAEAE--------------EAPAQKTRP---------KGEITGPVEDLEKQ------QEARE-V-DP-----H----------E-QLLRQIEESF--TTVNEGEIVKGRILAVGEKEVIIDI-GFKSTGIVSRNEFGDA-------EIKPGDEVEVFVERLEDAQGQLVLSKLKADRVRRWERVEDAYYNEKVIEGTIVRRVKGGMIAEIDGLEAFLPGSQIDVRP------------VRDFDAYIGKRMEFKIVKINPANENVVVSHRALLEKELQKQREEILSKMEPGQVLEGTVKNITDFGVFIDL------------GGVDGLLHITDLSWGRVSHPSELVQLG…
>non-CPR_non-CPR_Bacteroidetes_NC_007677
----------MAEQEQVA-A--PAE---AEEAAEAEAPADPST------VDEPAAEEPAPAEDAPADAADEDELERTEEAQGF-----TGETYGETDELETE------EQAPA-D-TS----VY----------D-QFRDVVDETS--IDVREQDIVEGRVLRVNEDYVVIDI-GYKSDGIVSRDEFGE-------EEIHPGDTVEVYLERKEDRDGQLVLSKEQADKVRRWQRVEEIYENEEVIEGTIIRRIKGGMIVELDGMEAFLPGSQIDVRP------------VRDFESYLETRMEFKIVKLNPENENIVVSHRELIEHELEEQRQEILEQLEVGQVLEGTVKNIVDFGVFIDL------------GGVDGLLHITDLSWGRVSHPSEVVELD…
>non-CPR_non-CPR_Bacteroidetes_NC_016621
----------MSN---------------QTEE---------------------------------------SDRINSS--------IKLKQEKEKSTKYET-------HLNNE-I-KE----ER----------K-KWEKIYEETL--PDIHELEIYKGIVTNIMDNHVIVDI-GFKAEGSIPIREFKEN---L---NFEVGSNMEVMIVKM-DYKGQCILSYQKAKTLRNWQKINQAYTKEEVILGYVAARTKGGLIVEIFEIECFLPGSHINVKP------------VRDYDTYVGKTMEVKVVKINKKTKNVVVSHKVLIERDIEEQRKEMISKLDKGQVLEGKIKNILPYGAFVDL------------GGVDALLHITDMSWHHINHPTEVVQLE…
>non-CPR_non-CPR_Bacteroidetes_NC_020510
----------MSN---------------QTGE---------------------------------------YEIKNEK---------QNDKNIKISTKYET-------HFSNE-I-QE----KR----------K-KLEEIYTKTL--PDIQELEIYQGIVTHISDTMIIVDI-GFKAEGAIPISEFREN---L---NIQVGSEIEVMVVKI-DYKGQCILSYQKAKMLRNWQRINQAYEKSEVILGYVAARTKGGLIVEIFDIECFLPGSHINVKP------------VRDYDTYVGKTMEIKVVKINQKTKNVVVSHKVLIERDIEEQRKEMISKLDKGQVLEGKIKNILPYGAFVDL------------GGVDALLHITDMSWPHINHPTEIVQLE…
>non-CPR_non-CPR_Bacteroidetes_NZ_CP019352
----------MAD---------------KAKQEEVVA----------------------------------AQETANTTKEAPV--AQANEKFLKEHNYQE-------GIDEV-E-DS----QL----------K-EFEKLVSENF--VDTLDDEVVTGEVVHITDRDAIIDI-NAKSEGVISLNEFRYN---P---DLKVGDKVEVLIDVREDATGQLVLSHRKARVIKAWDRVNNAHDTGEIVNGFVKCRTKGGMIVDVFGIEAFLPGSQIDVKP------------IRDYDQYVNKTMEFKVVKINHEFKNVVVSHKALIEADIEEQKKEIIGQLEKGQVLEGIVKNITSYGVFIDL------------GGVDGLVHITDLSWSRINHPNEIVELD…
>non-CPR_non-CPR_Bacteroidetes_NZ_CP019342
----------MAE---------------ETTKQELEA----------------------------------KDGVTDTQVQERVEKQQENQDFLDNERYSE-------GIEKV-D-EE----QL----------K-KFEKLVAENF--VDTIDNDVIEGTVIKITDRDAIIDI-NAKSEGAISLNEFRYN---P---HLKEGDKVEVLVDVREDATGQLVLSHRKARLIKAWERVNAAHDTGEIVNGYVKCRTKGGMIVDVFGIEAFLPGSQIDVKP------------IRDYDQYVDKTMEFKVVKINHEFKNVVVSHKALIEADIEEQKKEIISRLEKGQVLEGVVKNITSYGVFVDL------------GGVDGLIHITDLSWSRINHPQEVVELD…
>non-CPR_non-CPR_Bacteroidetes_NC_018721
----------MAE---------------DKQTNEQQ---------------------------------------SVADSDEQTQNQQENKQFLEDHKYEE-------GIDEV-D-DE----QL----------M-EFEKLVEENF--VDTLHNEVVDGTVVHLTDQDAIIDI-NAKSEGVISLNEFRYN---P---DLKIGDKVDVLIDIKEDAEGQLILSHRKARVIRAWERVNKAQEDGTIVNGLVKCRTKGGMIVDVFGIEAFLPGSQIDVKP------------IRDYDAYVGKSMEFKVVKINHEFKNVVVSHKALIEADIEEQKKEIIGQLEKGQVLEGVVKNITSYGVFVDL------------GGVDGLVHITDLSWSRINHPNEVVELD…
>non-CPR_non-CPR_Bacteroidetes_NC_013222
----------MAE---------------ENKKEEAV-------------------------------------ETAETQVQEAPAKKQEDQEFLENDKYEE-------GIERV-E-DE----KL----------A-EFEQLVKENF--VDTADEEVVKGTITHITDREAIIDI-NAKSEGVISLNEFRYN---P---DLQVGDTVDVLIDIREDKNGQLVLSHRKARTIKAWENVNEAHDKEEVVTGYVKCRTKGGMIVDVFGIEAFLPGSQIDVKP------------IRDYDQYVGKTMEFKVVKINQEFKNVVVSHKALIEADIEEQKKEIISQLEKGQVLEGVVKNITSYGVFIDL------------GGVDGLVHITDLSWSRINHPNEVVDLD…
>non-CPR_non-CPR_Bacteroidetes_NZ_CP014224
----------MSE----------------------------------------------------------NQNAAEAQEQETV---QVNQEFLANHKYEE-------GIDEV-D-EA----QL----------K-EFDAALEGTV--GFVNERDVIEGTVVRITDRDAIIDI-NSKSEGVISLNEFRYN---P---NLAVGDKVEVLVDRREDHSGQLVLSHKKARVIKAWDRVIAAQESGEVVNGYVKCRTRGGMIVDVFGIEAFLPGSQIDVKP------------IRDYDQYVDKTMEFKVVKINHEFKNVVVSHKALIEADIEVQKREIISGLEKGQVLEGIVKNVTSYGVFVDL------------GGVDGLVHITDLSWSRINHPSEVVELD…
>non-CPR_non-CPR_Bacteroidetes_NZ_CP013355
----------MSKLQEKIEA-----SSSDKKELETVKKIEKELGMQS--VKEEIKEEVKEVKEEVKEEVKEKEAKEEAKVEEDVKE-AVDEEFLENHKYEE-------GIEAV-D-EE----NI----------K-AFEAALEGTL--GLVNEREVIEGLVVRKTDREVIIDI-NSKSEGVISLNEFRYN---P---DLKVGDIVEVLVDKREDSTGQLVLSHKKARVIKAWERVNNAHETGEVVNGFVKCRTRGGMIVDVFGIEAFLPGSQIDVKP------------IRDYDQYVEKTMEFKVVKINHEFKNVVVSHKALIEADIEIQKKEIIGKLEKGQVLEGVVKNITSYGVFVDL------------GGVDGLVHITDLSWSRINHPSEVVELD…
>non-CPR_non-CPR_Bacteroidetes_NZ_CP017477
----------MSE---------------ETK------------------------------------------NTEEQVVATEVQETKKDKQFLADHKYEQ-------GIDEV-D-EE----KL----------K-EFEEALKGTI--GFVNESDVIEGTVVRITDRDAIIDI-NSKSEGVISLNEFRYN---Q---GLKEGDTVEVLVDKREDSSGQLVLSHRKARVIKAWERVNNAHETGEVVNGFVKCRTRGGMIVDVFGIEAFLPGSQIDVKP------------IRDYDQYVEKTMEFKVVKINHEFKNVVVSHKALIEADIELQKKEIIGQLEKGQVLEGVVKNITSYGVFVDL------------GGVDGLVHITDLSWSRINHPNEVVELD…
>non-CPR_non-CPR_Bacteroidetes_NC_009613
----------M---------------------------------------------------------------------------TLKSEQFLADHNYSE-------GIDPV-D-AA----NL----------R-EFEELVAKTF--IATDQEEVVEGVVVRITDRDVIVDI-NAKSEGVISLNEFRYN---P---SLKVGDKVEVLIDIREDKTGQLVLSHRKARTIKAWDRVISANETGEIVNGFVKCRTKGGMIVDVFGIEAFLPGSQIDVKP------------IRDYDQYVNKMMEFKVVKINHEFKNVVVSHKALIEADIEVQKKEIIGQLQKGQVLEGVVKNITSYGVFIDL------------GGVDGLIHITDLSWSRINHPSEVLELD…
>non-CPR_non-CPR_Bacteroidetes_NC_013162
----------M---------------------------------------------------------------------------NTQNEEFLQNDKYQE-------GIDSV-Q-ED----QL----------K-NFEELVKNNF--VDTQDNEVVEGVVTRITDREAIIDI-NAKSEGVISLNEFRYN---P---NLKVGDKVEVLIDIREDKNGQLVLSHRKARTLKAWDRINLAHENGEIVNGFVKSRTKGGMIVDVFGIEAFLPGSQIDVKP------------IRDYEQFVNKTMEFKIVKVNHEFKNVVVSHKALIEADIEEQKKEIISQLEKGQVLEGVVKNITSYGVFVDL------------GGVDGLIHITDLSWARINHPSEVVSVD…
>non-CPR_non-CPR_Bacteroidetes_NC_015321
----------MAK---------------QINA-----------------------------------------------------------QGSADDALA---------LDGY-T-LA----QR----------S-ELSDTYEKTL--TSINEKEVIEGTVIAVSKKEVIINV-GYKSEGVVAASEFRYN---A---ELKAGDVVDVFVECQEDKSGQLVISHRTARMHKAWIRVNDVLRTGEVITGFVKCRTKGGLIVDVFGIEAFLPGSQIDVKP------------IRDYDIYVGKNMEFKVVKINQEFRNVVVSHKALIEAELEEQKKQIISGLEKGQVLEGTVKNITSYGVFIDL------------GGVDGLIHITDLSWGRVNHPEEIVELD…
>non-CPR_non-CPR_Bacteroidetes_NC_016599
----------MSE---------------EKKAEEIAAN-----------KTDAGKQANEKTSEEVKAQTNEPKATDEVKEEEAPKAAPVEAVADEEEEFEY-------GLKSK-S-KK----ER----------E-ELTKLYEETI--TTIDEHTVTEGKVINMTDREAIVDI-GYKSEGVISLNEFRYN---P---DLKVGDEVEVLVDKQEDKDGQLVLSHRKARAIKAWDRVNLAFENEEVVNGYVKCRTKGGMIVDVFGIEAFLPGSQIDVKP------------IRDYDAYVDKTMEFKVVKINHEFKNVVVSHKALIEEDLEEQKKEIIGKLEKGQVLEGVVKNITSYGVFIDL------------GGVDGLVHITDLSWSRINHPSEVVELD…
>non-CPR_non-CPR_Bacteroidetes_NC_015144
----------MSK---------------ETKKEEI---------------------------------------------QEQV--NLVNNVPQEEDSFES-------GLGEA-D-RK----EK----------A-ELEAMYDDTL--EDLSETEVFKGKVVRLTDKEAIVDI-DFKSEGVISLNEFRYN---P---DLKVGDEVEVMVDQREDKNGQLVLSHRKARTLNAWAAVNNAHDTQEIVNGYIKARTKGGMIVDVFGIEAFLPGSQIDVKP------------IRDYDQYVGKTMEFKVVKINPEFKNVVVSHKALIEADIEEQKKEIVAQLEKGQVLEGEVKNITSYGVFVDL------------GGVDGLIHITDLSWSRINHPSEILEDG…
>non-CPR_non-CPR_Bacteroidetes_NC_018016
----------MSE---------------ETKN------------------------------------------------------NLLNNISPEDEAFES-------GLNEE-D-RK----EK----------A-ELEEMYENTL--EELDENVVFKGKVVRITDKEAIVDI-DFKSEGVISLNEFRYN---P---DLKVGDEVEVMVDQREDKNGQLQLSHRKARTLNAWARVNEANETGEIVTGNIKARTKGGMIVDVFGLEAFLPGSQIDVKP------------IRDYEQFVGKSMEFKVVKINPEFKNVVVSHKALIEADIEEQKKEIIGQLEKGQVLEGVVKNITSYGVFVDL------------GGVDGLIHITDLSWSRINHPNEVVEVD…
>non-CPR_non-CPR_Bacteroidetes_NZ_CP018786
----------MSK---------------ETN-------------------------------------------------------VLLNNVAPEQDSFES-------GLDAD-A-RK----EK----------S-DLEEIYNGSL--NNLDDNDVLVGKVVRLTDKEAIVDI-NFKSEGVISLNEFRYN---Q---GLKVGDEVEVMVDKREDKTGQLQLSHRKARTLKAWDKVNELHETGEIVNGFVKSRTKGGMIVDVHGIEAFLPGSQIDVKP------------IKDYDQFVGKTMEFKVVKINPEFKNVVVSHKALIEADIEGQKKEIIAQLEKGQVLEGTVKNITSYGVFIDL------------GGVDGLIHITDLSWSRVNHPSEILEDG…
>non-CPR_non-CPR_Bacteroidetes_NZ_CP012074
----------MAN----------------KDVQ---------------------------------------------------------VQPLADDEFEN---------GVH-A-EA----SK----------N-DLTKAYDETL--NKIQEHQVVEGTVISVDKKEVVVNI-GYKSDGIIPASEFRYN---P---ELKAGDKVEVYVENQEDKRGQLVLSHKKARLQKSWENINKALENDEVIQGYIKSRTKGGMIVDVFGIEAFLPGSQIDVHP------------IRDYDVFVGKTMEFKVVKINQEFRNVVVSHKALIEAELEAQRKEIISHLEKGQILEGTVKNITSYGVFVDL------------GGVDGLVHITDLSWGRVSDPHEVVALD…
>non-CPR_non-CPR_Bacteroidetes_NC_010729
----------MEN---------------------------------------------------------------------------LKIQPREDEEFE--------AGGVH-A-AV----SR----------Q-EQEAAYDKTL--NTIKEKEVVMGRVTAINKREVVINV-GYKSEGVVPATEFRYN---P---ELKVGDEVEVYIENQEDKKGQLVLSHRKARAARSWERVNEALEKDEIVKGYVKCRTKGGMIVDVFGIEAFLPGSQIDVRP------------IRDYDAFVEKTMEFKIVKINQEYKNVVVSHKVLIEAELEQQKKEIIGKLEKGQVLEGIVKNITSYGVFIDL------------GGVDGLIHITDLSWGRVAHPEEIVQLD…
>non-CPR_non-CPR_Bacteroidetes_NC_009615
----------MEN---------------------------------------------------------------------------LKIQPVEDDAFE--------QGETY-T-EV----SK----------D-DLVKTYDETL--NTVKDKEVVMGTVTSMNKREVVVNI-GFKSDGVVPMSEFRYN---P---DLKIGDEVEVYIESQEDKKGQLILSHKKARATRSWDRVNEALEKDEIIKGYIKCRTKGGMIVDVFGIEAFLPGSQIDVKP------------IRDYDVFVGKTMEFKIVKINQEFKNVVVSHKALIEAELEQQKKDIISKLEKGQVLEGTVKNITSYGVFIDL------------GGVDGLIHITDLSWGRVSHPEEIVQLD…
>non-CPR_non-CPR_Bacteroidetes_NZ_LT605205
----------MEN---------------------------------------------------------------------------LNVAPMEDAAYA--------EGDSY-S-KE----SK----------E-KLTESYDNTL--NKINDKEVVTGTVTSMNKREVVVNI-GYKSDGVVSMNEFRYN---P---NLKVGDEVEVYIESQEDKKGQLILSHKKARASRSWDRVNAALENNEVINGYIKCRTKGGMIVDVFGIEAFLPGSQIDVKP------------IRDYDIFVDKTMEFKVVKINPEYKNVVVSHKALIEEELEQQKKEIISKLEKGQVLEGVVKNITSYGVFVDL------------GGVDGLVHITDLSWGRIQHPDEVVKLD…
>non-CPR_non-CPR_Bacteroidetes_NC_014734
----------MEE---------------NKNITEEVIP-----------VIEETQAVVETPAA--------EEAPVVEVIEEA---VKAPPVPAGDDAYE--------KGITL-T-DS----AK----------E-DLEKIYDNTL--NAIKDKEVVEGTVILINKREVVVNV-GYKSDGVVPMSEFRYN---P---DLAVGDKVEVYIESQEDKKGQLILSHKQARATRSWDRVNAALESQEIVKGFVKCRTKGGMIVDVFGIEAFLPGSQIDVKP------------IRDYDVFVNKTMEFKVIKINHEFKNVVVSHKALIEAELELQKKEIIGKLQKGQVLEGTVKNITSYGVFIDL------------GGVDGLIHITDLSWGRVSHPEEIVTLD…
>non-CPR_non-CPR_Bacteroidetes_NC_015160
----------MSE---------------EKEM----------------------------------------QVEAAEKAAKKVAP--VTAEPEENDAYE--------NDAVV-P-AS----EK----------D-ALTQKYAETL--SKVGEKEVVEGTVISMNKREVVVNI-GYKSDGIISLNEFRYN---P---ELKVGDKVEVYVETQEDKKGQLTLSHKQARALRSWDRVNEALEKDEIIKGFVKCRTKGGMIVDVFGIEAFLPGSQIDVKP------------IRDYDVYVGKTMEFKVVKINQEFKNVVVSHKALIEAELEQQKKDIISKLEKGQVLEGTVKNITSYGVFIDL------------GGVDGLIHITDLSWGRVNHPNEIVTLD…
>non-CPR_non-CPR_Bacteroidetes_NZ_CP021904
M--------ALEE---------------NQNQ----------------------------------------EVQSEIKEEQKVQPEKVAESADDNDSFEA-------DDMSL-E-GA----KK----------E-DLEKLYDETL--STISEKEVIDGTVIAMNKREVVINI-GFKSDGIVSRNEFRYN---P---DLKVGDQVEVYVESQEDKKGQLVLSHKKARALRSWDRVNEALEKDEVIKGYIKCRTKGGMIVDVFGIEAFLPGSQIDVKP------------IRDYDVFVGKTMEFKVVKINPEFKNVVVSHKALIEAELEQQKKEIISKLEKGQVLEGTVKNITSYGVFIDL------------GGVDGLIHITDLSWGRVSHPEEIVQLD…
>non-CPR_non-CPR_Bacteroidetes_NZ_CP007451
----------MEE---------------KKELEQEVAE-----------VQDEKKEVVAETAA--------AEAPKAEAKKEK---AVETAEADADDSLEE-------GRDAY-S-EK----ER----------G-SLEDLYNDTL--NTVTEKEVLEGKVISLNKREVVVDI-GYKSDGIVSLNEFRYN---P---ELKVGDAVDVYIESLEDKKGQMILSHKKARATRSWERVNESLENDEIIKGYIKCRTKGGMIVDVFGIEAFLPGSQIDVKP------------IRDYDIYVGKTMEFKVVKINHEYRNVVVSHKALIEAELEQQKKEIIAKLEKGQVLEGTVKNVTSYGVFMDL------------GGVDGLIHITDLSWGRISHPSEIVELD…
>non-CPR_non-CPR_Bacteroidetes_NZ_CP013118
----------MEE---------------EKNLENQEVQ------------------------------------------------KQATVQQTEEDNYDK-------EVDDY-S-SE----ER----------Q-ELEKMYDDTM--STIGENEVVDGTVVAITKREVIINI-GYKSEGIVNANEFRYN---P---DLKVGDTVEVYVETQEDKDGQLKLSHKKARALRSWDRVNEALEKDEIIKGYIKCRTKGGMIVDVFGIEAFLPGSQIDVKP------------IRDYDMFVGKTMEFKVVKINQEYKNVVVSHKALIEAELEQQKKEIIAKLEKGQVLEGTVKNITSYGVFIDL------------GGVDGLIHITDLSWGRISHPEEIVELD…
>non-CPR_non-CPR_Bacteroidetes_NC_018011
----------MEE---------------------------------------------------------------------------TKVVANENNAFE--------NDLGV-Y-SQ----PK----------E-EIAEAYDKTL--SNVNVGEVVEGTVTGITKREVLVNI-GYKSEGVIPVSEFRYN---P---DLAVGDKIEVYVESAEDKNGQLALSHKKARQLKSWDRVNEALEKDEIIKGYIKCRTKGGMIVDVFGIEAFLPGSQIDVKP------------IRDYDVYVDKTMEFKVVKINQEFRNVVVSHKALIEAELEAQKQVIMSKLEKGQILEGTVKNITSYGVFVDL------------GGVDGLIHITDLSWGRVNHPEEIVALD…
>non-CPR_non-CPR_Bacteroidetes_NZ_HG934468
----------MTE---------------NQNPISVDTD------------------------------------------------ASINSHDNATNAFE--------TDSAI-Y-GT----DT----------T-DYVEKYDQTL--SRIQTGEVLDGAVTHVDKREVLVNV-GFKSEGVISRAEFNYN---P---ELKAGDTVEVYVENAEDKKGQLILSHKKARQLRSWDRVNAALESDEIIKGFVKCRTKGGMIVDVFGIEAFLPGSQIDVKP------------IRDYDIYVGKTMEFKVVKINQEFRNVVVSHKALIEAEIEAQKKDIIGKLEKGQILEGIVKNITTYGVFIDL------------GGVDGLVHITDLSWGRVNHPEEIVKLD…
>non-CPR_non-CPR_Bacteroidetes_NC_015501
----------MSN-------------------------------------------------------------------------NPTDIQPLADSGYA--------QDTDI-S-PE----MR----------K-EREAIYDKTL--TTIKENEVVMGKVMSISKREVLVNI-GYKSAGIISANEFNYN---K---DLKVGDEVEVLVESKEDRFGQLQLSHRKARAARAWEKIAAAQENDEVILGYIKSRVNGGMIVDIFGIEAFLPGSQIDVRP------------IKDYDAFVDKTMEFKIVKVNPEYRNVVVSHKVLIEAELEQQKKEIISKLEKGQVLEGVVKGITSYGAFVDL------------GGVDGLIHITDLSWGRIGDPSEVVSLD…
>non-CPR_non-CPR_Bacteroidetes_NC_013132
----------MAE------------QNAEQQAPAAAAQ----------------------------------------ATATTNAP----ATAHDDSVDKR-------NVSSY-S-QD----EK----------A-KYDATYDNTF--KVIEENGLLTGTVVGLTKTDVVINI-GFKSDGLISLNEFRDL---Q---GLKVGDEVEVLVVEKEDRDGNLHLSRKQARQQRAWEKIVEVYKTGEVVTGTVTSKTKGGLIVDVYGMETFLPGSQIDVKP------------VTDYDQFVSKTMEFKVVKVNEAIRNAVVSHKALIESDIEQQRVDIISKLEKGQVLEGTIKNITDFGAFIDL------------GGLDGLLYITDISWGRISHPSEVLQMD…
>non-CPR_non-CPR_Bacteroidetes_NC_016609
----------MFH------------LNADAQESSAAGQ---------------------------------------EATATPKAP-EVINSAHDDSIDKR-------NVATY-S-KE----EK----------L-KYDAVYEGTF--KAVTDGELVKGLVVALTKTDVVINI-GFKSDGLVSLNEFRDL---P---NLKTGDEVEVMVVEKEDREGHLNLSRKQARITRAWEKIVEVHKTGEVITGTVTSKTKGGLIVDVFGMETFLPGSQIDVKP------------VTDYDQFVGKTMEFKVVKINEAIKNAVVSHKALIESDIEAQRAEIMSKLERGQVLEGTIKNITDFGAFMDL------------GGLDGLLYITDISWGRISHPGEVLKLD…
>non-CPR_non-CPR_Bacteroidetes_NZ_CP007035
----------MFQ------------LNADAQESAGAAD----------------------------------EPVAEAATATTTAP-PVAETAHDDSIDKR-------NVSSY-T-KE----EK----------E-KYDKVYENTF--VQLNDGELINGIVVGITNTDVVLNI-GFKSDGLISLNEFRDL---Q---GLKIGDEVEVMIVEKEDRDGHLNLSRKQARTTRAWERIVEVNKTGEVVTGTVTSKTKGGLIVDVFGMETFLPGSQIDVKP------------VTDYDQFVGKTMEFKVVKINETIKNAVVSHKALIESDIEAQRAEIIGKLEKGQVLEGTVKNITDFGAFMDL------------GGLDGLLYITDISWGRISHPNEVLKID…
>non-CPR_non-CPR_Bacteroidetes_NC_016940
[truncated: 597 more rows]

## Sheet: uS2
>CPR_others_Dojkabacteria_GCA_000989505.1
[truncated: 2,469 more rows]

## Sheet: uS3
>CPR_others_Dojkabacteria_GCA_000989505.1
[truncated: 2,197 more rows]

[truncated: 50 more sheets: uS4, uS5, bS6, uS7, uS8, uS9, uS10, uS11, uS12, uS13, uS14, uS15, bS16, uS17, bS18, uS19, bS20, bS21, uL1, uL2 …]
