# Supplementary material
Source: HighWire-hosted journal article supplement (doi:10.1101/rna.079103.122)
Supplement: Supplemental_Table_S9.xlsx [file Supplemental_Table_S9.xlsx]

## Sheet: Title
Supplementary Table S9. rRNA gene sequence alignments (FASTA format) used to generate Supplementary Figure S5.

## Sheet: 16S rRNA
>CPR_others_Dojkabacteria_GCA_000991805.1
ttcaatgagagtttgatcatagctcagaatgaacgttggctgtgtgcctaaggtatgcaagtcgaacgatccctttga--------ttctcgcctgggatagtggcaaacgggtgagtaacatgtggaaatctccctcaaagtcaagaacagctcgccgaaaggcggggtaatacttgatagtcttacatatgtaaaa--------------ctccggtgctttgagatgagtccgcatcctatcagctagttggtgaggtaatagctcaccaaggctaagacgggtagctggcgtgagagcgcggtcagccaccatggaactgagacacggtccatactcctacgggaggcagcaattaggaatattacacaatgggggcaaccctgatgtagcgaca…
>CPR_others_CPR3_GCA_000990575.1
ttttatgagagtttgatcctggctcaggatgaacgctggcggcgtgcctaaggtatgcaagtcgagcgacccacttcg----------------ggtgggagcggcaaacgggtgagtaacacgtggatatctacctctaacacaaggatagctcgccgaaaggcggattaatacttgatagtctcttaagagtaaag--------------ctttggcggttagagatgagtccgcggcctatcagcttgttggtaaggtaatggcttaccaaggctataacgggtagctggtctgagaggatggtcagccacactgggactgtgacacggcccagactcctacgggaggcagcaatcaggaatcttgcgcaatgggggaaaccctgacgcagcgacg…
>CPR_WWE3_WWE3_GCA_001772655.1
tttttttagagtttgatcctggctcaggatgaacgctagcggcgtgcctaaggtatgcaagtcgtatgtgagcccgac--------caagtcgggccgaacatggcgaacgggtgagtaacgcgtgggaatctgcctagaagacagagataaccccgagaaatcggggctaatatctgataatctcgcaagagcaaag------------cagcaatgcacttctagatgagcccgcgccctatcagcttgttggtgaggtaatggctcaccaaggctatgacgggtagggggtctgagaggatgtccctccacaatggcactgagacaagggccatacgcctacgggtggcagcaattaggaatcttgcacaatggacgaaagtctgatgcagcgacg…
>CPR_WWE3_WWE3_GCA_001772955.1
tttacggagagtttgattctggctcagaacgaacgctggcggcgtggataagacatgcaagtcgaacggaaccagttttgt-----acatggattggttcagtggcgaacgggtgagtaacaggtgggaatctaccatgaagttcggaatagctctccgaaaggggaattaataccggatgtgatcgaa-gattaaagctggg---cgcaaggcctggcgcttcttgatgagcccgcctcctatcagctagttggtggggtaacggcccaccaaggctttgacgggtagctggtctgagaggacgaccagccacactgggactgagacacggcccagacacctacgggtggcagcagtcgaggatttttctcaatgggggaaaccctgaaggagcgacg…
>CPR_WWE3_WWE3_GCA_001873785.1
tttattgagagtttgatcctggctcaggacgaacgctggcggcgtgctttaggtatgcaaatctaacggatctgtact--------ccggggggcgggtcagtggtgaacggctgagtaacgcgtaggaatctacccacaagatgtgaataaccccgagaaatcggggctaatacacaatagtttccgaggaataaaggt--------tgtagccttccgcttgtggaggagcctgcgtcccatcagctagttggcggggtaaaagcccaccaaggcaatgacgggtagggggcgtgagagcgcgaccccccagaggggcactgatacacgggcctcactcctacgggaggcagcaatctggaatagtcggcaatgggcgaaagcccgaccgcgcgacg…
>CPR_WWE3_WWE3_GCA_001772615.1
tcttttgagaatttgatcctggttcaggatgaacgctggcggtgtgcttaaggtatgcaagtcgagcggttctagccc--------caaag--gaaggatagcggcgaacggcttagtaacacgtaggaacctaccctaaagtagaagataacagaccgaaaggtctgctaatactctatgtgatcgca-gatcaaag--------gaagtaat-ggg-gctttaggaggggcctgcggcctatcagcttgttggtggggtaaaagcctaccaaggctatgacgggtacccggactgagaggtcggtcgggaagaggggaactgagatacggtcctcactcctacgggaggcagcaatcgggaatcttgcgcaatggacgaaagtctgacgcagcgaca…
>CPR_WWE3_WWE3_GCA_001772985.1
ttttttgagaattcgatcctagttcaggacgaatgctagcggcgtgcctaaggtatgcaagtctaac-------------------cccgcctttggcggagtggcgaacggctgagtaatacgcaggaatctaccctcaagtaaggaataacccaccgaaaggcgggataataccttatgtggtggcaacactaaag--------tctgtatttattcgcttgaagacgagcctgcggcctatcagttagttggtggggtaaaagcctaccaagactatgacgggtaccgggcctgagagggcgtaccggcagaggggcactgagacacgggcctcactcctacgggaggcagcaatcgggaatattgcgcaatggacgaaagtctgacgcagcgacg…
>CPR_WWE3_WWE3_GCA_001773055.1
tttgttaagaatttgatcctagttcagggtgaatgctagcggtgtgcttaagatatgcaagtcgagcgattc--------------ttcgcaagaaggatagcggcgaacggctgagtaacacgtaggaacctacccccaactcagggatagctccgggaaaccggaattaatacctgatgtgaaggcaactttaaag--------------atttatcggttggggatgggcctgcggcctatcaggtagttggcggggtaaatgcccaccaagcctacgacgggtagctgatgttagcgcatgatcagccagaggggcactgagacacgggcctcactcctacgggaggcagcaatcgggaattttgcgcaatggacgaaagtctgacgcagcgaca…
>CPR_MG_Woykebacteria_GCA_001816835.1
ttttcgaagagtttgatcctggctcaggatgaacgctggcggcgtgccttaggcatgcaagtcaagggggtc--------------gccgcaaggcgacaaccggcggacgggtgagtaacgcgtaggaatctacccttaagtggggaatagctcgccgaaaggcggggtaataccgcataatgtttca-aaccaaagca--------cgtaactgtgcgctaaaggatgagcctgcgtcccatcagctagttggtagggtaatggcctaccaaggctacgacgggtagctggtctgagaggatggtcagccacaatgggactgagacacggcccatacacctacgggtggcagcaaccgggaatagttcgcaatggacgaaagtctgacgacgcgacg…
>CPR_MG_Woykebacteria_GCA_001816975.1
ctaaatgagagtttgatcctggctcaggatgaacgctaacggcgtgctttaggcatgcaagtcgagcgacgtg-------------ccgcaagggttacgagcggcagacgggtgagtaatgcataggaatctacccttacctttgggataacccaccgaaaggtgggctaatacctaatagtcctaga-aggtaaaggg--------cgtaactgcttgggtaaggacgagcctatgtcccatcagcttgttggtagggtaatggcctaccaaggcaatgacgggtagctggactgagaggtcggccagccacaagggcactgagacacgggccctactcctacgggaggcagcaaccgggaatcgtagacaatgggcgaaagcctgatctcgcgacg…
>CPR_MG_Woykebacteria_GCA_001816825.1
tctttggagagtttgatcctggctcagggtgaacgctagcggcgcgctttaggcatgcaagtcgaacgaccccaccctctacttctcctagagggtggggagtggcagacgggtgagtaacgcgtaggaatctacctagaagtggggaataactccgggaaaccggggctaataccgcatgtggtgctgagagcaaaggg--------cataactgctcgcttctggaggagcctgcgttccatcagcttgttggtggggtaaaggcctaccaaggcaacgacggatagctgggctgagaggttgaccagccacaagggcactgagacacgggccctactcctacgggaggcagcaaccgggaatcgtagacaatgggcgaaagcctgatctcgcgacg…
>CPR_MG_Woykebacteria_GCA_001816655.1
tatttggagagtttgatcctggctcagggtaaacgctggcggcgtgccttaagcatgcaagtcgaacgacccc-------------tcgcaagatcggggagtggcggacgggtgagtaacgcgtgagaacgtaccccttagtgaggaataactccgcgaaagcggggctaataccgcatactatcaggtgatcaaagga--------tgtaactattcgctaagggagcggctcgcgtcccatcagcttgttggtagggtaatggcctaccaaggctacgacgggtagctggactgagaggttgaccagccacaagggcactgagacacgggccctactcctacgggaggcagcaactgggaatcgtagacaatgggcgaaagcctgatctcgcgacg…
>CPR_MG_Curtissbacteria_GCA_001774835.1
ttatttgagagtttgatcctggctcaggatgaacgctggcggcgtgccttaggcatgcaagtcgaacggcc---------------gatttaatcggggcagtggcggaagggtgagtaacgcgtgggaacgtaccatttggtggagtatagccttccgaaaggaggggtaattctccgtaacctcacaagaatagag----------tttaaccactcgccgaatgagcggcctgcgtcctatcagcttgttggtggggtaatggcctaccaaggcgatgacgggtagctgggctgagaggtcggccagccacaagggaactgagacacggtccctacacctacgggtggcagcaaccgggaatcttggacaatgggcgaaagcctgatccagcgacg…
>CPR_MG_Curtissbacteria_GCA_000994745.1
ttttttaagagtttgatcctggctcaggatgaacgctggcggcgtgcct-aggcatgcaagtcgaacgggcctgatttgctgtccacgagagagaagggcagtggcggaagggtgagtaacgcgtgggaacgtaccttttggtggagcatagccttccgaaaggaggggtaatactgcataatcccaca-gggcaaag--------ggcttaaccgcccgccgaaagagcggcctacgtcctatcagcttgttggtggggtaaaagcctaccaaggcgatgacgggtagctggactgagaggtcggtcagccacaagggaactgagacacggtccctacacctacgggtggcagcaactaggaattttggacaatgggcgaaagcctgatccagcgacg…
>CPR_MG_Curtissbacteria_GCA_000404925.1
tttattgagagtttgatcctggctcaggatgaacgctggcggcgtgccttaagcatgcaagtcgaacgggcttgcttt---ttttccaaggtgcaaggcaagtggcggaagggtgagtaacgcgtgggaacgtaccatttggtgggggatagctttccgaaaggagggataatcccgcataagcccgaa-ggggaaag--------------atttatcgccgaatgagcggcccgcgtcctatcagtttgttggtggggtaatggcctaccaagacgatgacgggtagctgggctgagaggtcggccagccacaagggaactgagacacggtccctacatctacggatggcagcaactgggaatcttggacaatgggggaaaccctgatccagcgacg…
>CPR_MG_Daviesbacteria_GCA_001776975.1
tttattgagagtttgatcctggctcaggatgaacgctggcggcgtgccttaagtatgcaagtcatgggggttc----------------cgcaaggagcaaccggcggacgggtgagtaatgcatgggaatctaccttaaagttggatatagcttgccgaaaggcagggtaatctccaatgtgtacg-a-aagtaaag--------------agcaatcgctttaagatgagcctgtgtcctatcagctagttggtggggtaaaagcctaccaaggcgacgacgggtagctggtctgagaggatggtcagccacaatgggactgcgacacggcccatacacctacgggtggc-gcagctaggaattttcgacaatgggcgcaagcctgatcgagcgacg…
>CPR_MG_Daviesbacteria_GCA_000996555.1
tttattgagagtttgatcctggctcaggatgaacgctggcggcgtgccttaagcatgcaagtcgaacgggccc------------------gcaagggtcagtggcggacggttgagtaataggcgggaatctacctcgaagtgggacatagccagccgaaaggttgggtaatttcccatgtgatcgca-gatcaaag------------ccgcaaggcgctttgagatgagcctgcctcctatcagcttgttggtggggtaatggcctaccaaggcaacgacgggtagctggtctgagaggatggtcagccagagtgggactgcgacacggcccacacacctacgggtggcagcaactaggaatcttgggcaatgggcgaaagcctgacccagcgacg…
>CPR_MG_Daviesbacteria_GCA_001776985.1
tttattgagagtttgatcctggctcaggatgaacgctggcggcgtgccttaggcatgcaaatcaaggggggtcccgat-----------tatcgggatcaaccggtggacgggtgagtaacgagtgagaatctaccttaaagaggggcatagcttgtcgaaagacgaggtaatttcccatgtgatcgca-gattaaag------------ccgcaaggcgctttaagatgagctcgcttcctatcagcttgttggtggggtaatggcctaccaaggcaacgacgggtagctggtctgagaggatggtcagccacaatgggactgcgacacggcccatacatctacggatggcagcaaccgggaatattggacaatggacgaaagtctgatccagcgacg…
>CPR_MG_Daviesbacteria_GCA_001776785.1
ttatctgagagtttgatcctggctcaggatgaacgctggcggcgtgccttaagcatgcaagtcaagggggcgc----------------agtaatgcgcaaccggcggacgggtgaggaatacgtgggaatctaccttaaagtataggatagccagccgaaaggttgggtaatactgtatgtgatcgca-gattaaag--------------atttatcgctttaagatgagcctgcgtcctatcagcttgttggtggggtaatggcctaccaaggcaacgacgggtagctggtctgagaggatggtcagccacaataggactgagacacggcctatacatctacggatggcagcaactgggaatcttcggcaatgggcgaaagcctgaccgagcgacg…
>CPR_MG_Daviesbacteria_GCA_001777435.1
ttttttgagagtttgatcctggctcaggataaacgttggcggcgtgccttaggcatgcaaatcaagggggtc--------------caa----g-aagcaaccggtggacgggtgagtaatgcgcgggaatctgcctggaagttggacatagctcgccgaaaggcgaggtaatttccaatgtgtccgcacggacaaag---------ccgca---aggcgcttccagatgagcctgcgtcctatcagcttgttggtggggtaatggcctaccaaggcaacgacgggtagctggactgagaggtcggtcagccacaacgggactgcgacacggcccgtacatctacggatggcagcaaccgggaatattgcgcaatgggcgaaagcctgacgcagcgacg…
>CPR_MG_Levybacteria_GCA_001782015.1
ttttttgagaatttgatcctggttcaggacgaatgctggtggcgtgctttaggtatgcaagtcgagcggtcccctctttttattcataaaaagaggggacagcggcagacgggtgagtaatacataggaatctaccccccacaggaagataactcctcgaaagaggtgctaatactccatagtctcgcaagagtaaagga--------cttaactgtccggtgagggaggagcctatgttctatcagctagttggtagggtaatggcctaccaaggctataacggataactggactgagaggtcggccagtcacaggggcactgagatacgggctccacacctacgggtggcagcaaccagggatattgcgcaatggacgaaagtctgacgcagcgacg…
>CPR_MG_Levybacteria_GCA_001873215.1
ttttttgagaatttgatcctggttcaggatgaacgctagcggcgtgctt-aggtatgcaagtcgaacggacc-tttttggtttttttgaaaagagtgagcagtggcagacgggtgagtaacgcgtaagaatctacctttcagtggggcacaacagtccgaaaggattgctaattccccataatatctcc-gattaaag--------gacttaactgtccgctgaaagaggagcttgcgccctatcagcttgttggtgaggtaaaggctcaccaaggctatgacgggtagctggactgagaggtcggccagccacaggggcactgagacacgggctccacacctacgggtggcagcaaccaggaatattgggcaatggacggaagtctgacccagcgacg…
>CPR_MG_Levybacteria_GCA_001782675.1
tttaatgagagtttgatcctggctcaggatgaacgctggcggtgtgctttaggtatgcaagtcgaacggtcccg------------acgcaagtcggggcagtggcggacgggtgagtaatacgcaagaatttaccctcgagtggaaaataaccccgcgaaagcggggctaatgttccatgaggtcccgggatcaaaggg--------cttaacggcccgcttggggagaagcttgcgtcctatcagcttgttggcggggtaatggcccaccaaggctatgacgggtagctggactgagaggtcggtcagccacaggggcactgagacacgggctccacacctacgggtggcagcaaccaggaatattgggcaatgggcgaaagcctgacccagcgaca…
>CPR_MG_Levybacteria_GCA_001783815.1
ttttttgagaatttgatcctggttcaggatgaacgctggcggtgtgctttaggtatgcaagtcgatcggtctgtaagaccggttaatctgtcttacagacagaggcggacgggtgagtaatgtacaagaatctaccctcgaccggaaaataacctgtcgaaagacgggctaatgttccatgaagactccggtttaaagcg--------attaacttcgcggttgaggaggagcttgtatcctatcagctagttggtaaggtaatggcttaccaaggcgatgacgggtagctggactgagaggtcggtcagccacaactgcactgagacacgggcagtacacctacgggtggcagcaactaggaatattgggcaatggacgaaagtctgacccagcgaca…
>CPR_MG_Levybacteria_GCA_001782565.1
ttttttgagagtttgatcctggctcaggatgaacgctggcggcgtgccttaggcatgcaagtcgaacgaatt--------------tccgcaaggaaatgagtggcagacgggtgagtaacgcgtaggaatctacccctgggaggaccatagcccctcgaaagagggggtaatagtccatacccc-gcaagggaaaagca--------attaactttgcgccgagggaggagcctgcgtcctatcagcttgttggcggggtaaaagcccaccaaggctctgacgggtagctggactgagaggtcggtcagccacaactgcactgaaacacgggcagtacacctacgggtggcagcaactaggaatattgcgcaatgggggaaaccctgacgcagcgacg…
>CPR_MG_Levybacteria_GCA_000994125.1
ttttttgagagtttgatcctggctcaggatgaacgctggcggcgtgccttaggcatgcaagtcaagggggtccg------------ccatctggcggacaaccggcagacgggtgagtaacgcgtgggaatctacccctgggtggagcatagccctccgaaaggaggggtaattctccataatctcgaaagagcaaaggt--------cttaactggccaccgagggaggagcctgcgtcctatcagcttgttggtggggtaaaagcctaccaaggctatgacgggtagctggactgagaggtcgatcagccacaactgcactgaaacacgggcagtacacctacgggtggcagcaaccgggaatattggacaatggacgaaagtctgatccagcgacg…
>CPR_MG_Levybacteria_GCA_000380825.1
ttttttgagaatttgatcctggttcaggatgaacgctggcggcgtgccttaagcatgcaagtcaaaggaacaag------------tcgtaagacaagtaactggcagacgggtgagtaacgcgtaggaatctacctctaggtggaacatagcctctcgaaagagggggtaatattccatggtaccgcaaggttaaagga--------gttaacgctccgccaagagatgagcctgcgtcctatcagcttgttggtggggtaaaagcctaccaaggcgatgacgggtagctggactgagaggtcgatcagccacaactgcactgagacacgggcagtacatctacggatggcagcaactaggaatattggacaatggacgaaagtctgatccagcgacg…
>CPR_MG_Roizmanbacteria_GCA_016700135.1
ttttttaagagtttgatcctggctcaggatgaatgctagcagtgcgcctgagatatgcaagtcgagcgttgccttgag--------tgctcttgagaggaagcggcggacggctgagtaacacgtagg--atctcccctaggtaaagaatagctcaccgaaaggtggggtaatgctttatggtctccgaggagtaaag--------------tct--tccgcaaaggatgaacctgcggcctatcaggtagttggtgagataatagcttaccaagcctatgacgggtagctggcctcagagggtggtcagccaga-ggggactgagacac-ggccccactcctacgggaggcagcaatcaggaatcgtcggcaatggg-ggaaacctgaccgcgcgaca…
>CPR_MG_Roizmanbacteria_GCA_016699265.1
ttttttaagagtttgatcctagctcaggatgaacactagcggcgtgcctgagatatgcaagtcgaatgtctttttctccg------caaggagagaaggtaatggcggacggctgagtaacacgtggggacctgccctaaagtagggaatagctcaccgaaaggtggggtaatactctatatccagtttactggaaagag--------cttaactgctcgcttaaggatggacctgcgtcctatcagatagttggtgaggtaaaggcttaccaagtctatgacgggtagctggcctgagaaggtggtcagccagaggagcactgagatacgggctccactcctacgggaggcagcaatcaggaatagtcggcaatgggcgaaagcctgaccgcgcgacg…
>CPR_MG_Roizmanbacteria_GCA_001789885.1
--tattgagagtttgatcctggctcaggatgaacgctggcggcgtggataaggcatgcaagtcgtgtgggtt------------------------gacccacggcaaacgggttagtaatgcataggaacgtgccctggagacgcggataatccgtcgaaaggcggaataatacgcgatactctcgca-gaataaag--------attgtaattagccgctctgggagcggcctgtgtcctatcagctagttgg
>CPR_MG_Roizmanbacteria_GCA_001790075.1
atttttaagagtttgatcatggctcaggattaacgctggcggtgtgctttaggtatgcaagtcgagcgggattttttc--------gcaagagaaagtccagcggcggacggctgagtaacacgtgggaatctgcccctaagtagagaatagctcggcgaaagccggggtaatactctatgtcccc-ctgcgggaaaggg--------cgtaactgctcgcttagggaggagcccgcggcctatcaggtagttggtggggtaatagcctaccaagccgatgacgggtagctggtctgggaggacggacagccagagagggactgagacacggccctcactcctacgggaggcagcaaccaggaatattgcgcaatgggcgaaagcctgacgcagcgaca…
>CPR_MG_Roizmanbacteria_GCA_001787945.1
tttattaagagtttgatcctagctcaggatgaacgctagcggtgtgcctaagatatgcaagtcgaacgctccgatgat--------aggggctatcggagagtggcggacggctgagtaacacgtacaaacttacccccctcttgagaatacccccgcgaaagcggagctaatactcaatggttcccgcgggataaaggg--------cgtaactgctcggaaggggagaggtgtgcggactatcaggtagttggtggggtaatagcctaccaagcctatgacggttatccggtttggaagaacggccggacagaggagcactgagacacgggctccacacctacgggtggcagcaattaggaatagttggcaatgggggaaaccctgaccacgcgaca…
>CPR_MG_Roizmanbacteria_GCA_001788225.1
ttttttaagagtttgatcctggctcaggattaatgctagcggtgtgcctaagatatgcaagtcgaacgatccc-------------gtgcaaatcggggaagtggcggacggctgagtaatacgtacgaagttacccttacctcgtgaatacccccgcgaaagcggggctaatacacgatatttcctgctggaaaaagga--------cataactttccgggtaaggagatgcgtacggactatcaggtagttggtagggtaacggcctaccaagcctatgacggttatccggctcgtatgagtgaccggacagaggagcactgagatacgggctccacacctacgggtggcagcaatcgggaatagttggcaatgggcgaaagcctgaccacgcgaca…
>CPR_MG_Roizmanbacteria_GCA_001788165.1
tcctttaagagtttgatcctggctcaggatgaacgctagcggtgtgtttaagatatgcaagtcgagcgaatccgattgtta-----gctgatagtcgataagcggcagacggctgagtaacacgtaggaacctacccctcggtaaggaatagccccgagaaatcgggggtaatactttatagtctcgcaagagtaaaggg--------cataactgctcgccaagggaggggcctgcggcctatcaggtagttggtagagtaatagcctaccaagcctatgacgggtagctgaccttagagggtgaacagccagaagagcactgagacacgggctctacacctacgggtggcagcaatcaagaatcgttggcaatgggcgaaagcctgaccacgcgaca…
>CPR_MG_Roizmanbacteria_GCA_001789535.1
ttttttaagagtttgatcctagctcaggatgaacgctagcggcgtgcctgagatatgcaagtcgaacgtctttttgca--------gcaatgcaaaaagtagtggcggacggctgagtaacacgtagggacctgcccctaggtaaagaatagcccatcgaaaggtggggtaatgctttatagtctcttttgagtaaaggg--------cgtaactgcccgccaagggatggacctgcgatctatcagatagttggtaaggtaacggcttaccaagtctacgacggatagctggctttagagagtggccagccagaggggtactgagacacggaccccactcctacgggaggcagcaatcaggaatagtcggcaatgggcgaaagcctgaccgtgcgacg…
>CPR_MG_Roizmanbacteria_GCA_001873595.1
tttattaagagtttgatcctggctcaggatgaacgctagcggcgtgcctgagatatgcaagtcgaatgtcttgtgcttcgcgttgatgtggagcacgagtaatggcggacggctgagtaacgcgtaggtatttgcccctttcttgataatagccccgcgaaagcgggggtaataatcaataatatcaagtgattaaagaa--------tataactatttggaaagggataagcctgcgtcctatcaggttgttggtagggtaactgcctaccaagccaatgacgggtagctggcccgagagggtggtcagccagaggggtactgagacacggaccccacttctacggaaggcagcaatcaggaatagtcggcaatgggcgaaagcctgaccgcgcgacg…
>CPR_MG_Roizmanbacteria_GCA_001790155.1
ttttttaagagtttgatcctggctcaggatgaatgctagcggcgtgcttgagatatgcaagtcgagcgccccgctcaatcc-----gggggctgagcgggagcggcggacggctgagtaatatacaggaacctgccccctaatagaggatagcccagcgaaagttggggtaatactttatggtctccgcggggtaaagag--------cttaactgctcgttaagggatgggcctgtatcctatcaggtagttggtgaggtaatagctcaccaagcctatgacgggtagctgatcttagaggatgatcagccagagggggactgagacacggcccccactcctacgggaggcagcaatcaggaatagtcggcaatggacgaaagtctgaccgcgcgacg…
>CPR_MG_Roizmanbacteria_GCA_001789805.1
ttttttaagagtttgatcctggctcaggatgaacgctggcggcgtgcctgagatatgcaagtcgagcgacttcttgtgcttgttaacggagcgtgaggagagcggcggacggctgagtaacacgtaggaatctacccctaggtggagaatagctcatcgaaaggtggggtaatactccataaccaggcggctggaaagga--------cgtaactgttcgccaagggaagaacctgcggcctatcaggtagttggtagggtaacggcctaccaagccaatgacaggtagctggcctcagagggtggtcagccagagggggactgagacacggcccccactcctacgggaggcagcaatcaggaatagtcggcaatgggcgcaagcctgaccgcgcgacg…
>CPR_MG_Roizmanbacteria_GCA_000991535.1
ttttttaagagtttgatcctggctcaggatgaatgttggcggcgtgcctgagatatgcaagtcgagcgtcttttctaccg------caaggtggaaaggtagcggcggacggctgagtaacacgtagggatctgcccttgtttggaggatagccccgcgaaagcggggataatactccataatgtcttcggactaaagag--------agtaacttcttgaacaaggatgttcctgcggcttatcaggtagttggtagggtaatggcctaccaagcctatgacgagtagctggcctgagagggtggtcagccagaggggcactgagatacgggccccactcctacgggaggcagcaatcaggaatagtcggcaatgggcgaaagcctgaccgcgcgacg…
>CPR_MG_Roizmanbacteria_GCA_001789855.1
ttttttaagagtttgatcctggctcaggatgaatgttggcggcgtgcctgagatatgcaagtcgaacgtccag----------------cgcaagactggagtggcggacggctgagtaacacgtaggaatcttccccaaaataagggatagctcgtcgaaagacggggtaatcctttatggtcccg--tgggtaaagtg--------cttaactgcacgttttgggatgagcctgcggcttatcaggtagttggtagggtaacggcctaccaagcctataacgagtagctggtcttagaggatggtcagccagagggggactgagacacggcccccactcctacgggaggcagcaatcaggaatagtcggcaatgggcgcaagcctgaccgcgcgacg…
>CPR_MG_Gottesmanbacteria_GCA_001780865.1
ctttttgagagtttgatcctggctcaggataaacgctggcggcgtgccttaggcatgcaagtcgaatgcactgaaaaatcg-----aagattttttagtgaatggcggacgggtgagtaatagtaaggaatctgccccgaagtgaaggacatctcgtcgaaagacggggtaatcctgcataatctcgcaagagcaaagag--------cgtaactgctcgctacgggaggagccttactcctatcagctagttggtggggtaaaagcctaccaaggctatgacgggtagctggtgtgagagcatgaccagccacaatggcactgagatacgggccatacacctacgggtggcagcaaccgggaatcgtcggcaatggacgaaagtctgaccgcgcgacg…
>CPR_MG_Gottesmanbacteria_GCA_001779315.1
atttttgagagtttgatcctggctcaggataaacgctggcggcgtgccttaggcatgcaagtcgagcgatcccgatagc----------aatatcgggatagcggcagacgggtgagtaatggtaaggaatctacctcgaagtgaaggacatctcgtcgaaagacggggtaatcctgcataagccctccaggggaaaggg--------cgtaactgcccgctttgagaggagccttactcctatcagcttgttggtggggtaaaagcctaccaaggctatgacgggtagctggtgtgagagcatgtccagccacaatggcactgagacacgggccatacacctacgggtggcagcaaccgggaatcgtcggcaatgggcgaaagcctgaccgcgcgacg…
>CPR_MG_Gottesmanbacteria_GCA_001780985.1
ttttttgagagtttgatcctggctcaggatgaacgctggcggcgtgccttaggcatgcaagttgaacggt---------------------cgaaagattagtggcggacgggtgagtataagcaaggaacgtacctttttctggaacatagctcgtcgaaagacggggtaatattccatgaggtcgtaagatcaaagtg--------cgtaacggcacggaggaagagcggccttgctcctatcagcttgttggtggggtaatggcctaccaaggcgatgacgggtagggggcgtgagagcgcgaccccccacaatagcactgagacacgggctatacatctacggatggcagcaactaggaatattcggcaatgggcgaaagcctgaccgagcgacg…
>CPR_MG_Gottesmanbacteria_GCA_001779455.1
ctttttgagagtttgatcctggctcaggatgaacgctggcggcgtgccttaagcatgcaagtcgtacggagattgtgtctatttttctaggcatgaaatcagtggcggacgggtgagtataagcaaggaacgtaccctttactctgacatagctcgtcgaaagacggggtaatatcagatgagaacgcaagttcaaagtg--------attaacctcacggtattggagcggccttgttcctatcagcttgttggtggggtaatggcctaccaaggctctgacgggtagggggtgtgagagcacgaccccccacaatggcactgagacacgggccatacatctacggatggcagcaactgggaatcgttggcaatgggcgaaagcctgaccacgcgacg…
>CPR_MG_Shapirobacteria_GCA_001790735.1
agtactaagagtttgatcgtggctcagggtgaacgctggcgatgtgcctaagacatgcaagtcgaacgagatttgtgtgtatttttctatacacgagtttagtggcaaacgggtgagtataagatacgaacgtactccaaagcggagcatagtccaccgaaaggtggggtaattctccatagtccctccggggtaaagat------------gcaaatcactttggaagcggcgtatctactaccagctagttggtgaggtaatggctcaccaaggctatgacggttaacggctcttagcggagagtccgtcacaatgggactgagacacggcccatacacctacgggtggcagcagttaggaattttgcgcaatggacgaaagtctgacgcagcgaca…
>CPR_MG_Shapirobacteria_GCA_000989305.1
tgtactaagagtttgatcgtggctcagggtgaacgctggcggtgtgcctaagacatgcaagtcgaacgatctttcgtt--------gaagggcgccggatagtggcaaacgggtgagtataaaataggaacgtacttcgaagcggggcatagcccctcgaaagagggggtaatttcccatacgcctacg-ggtgaaagac------------gcaagtcactacgaaaacggcctatttactaccagcttgttggtaaggtaacggcttaccaaggctatgacggttaccagctcttagcggagagtctggcacaatgggactgagacacggcccatacacctacgggtggcagcagttaggaattttgcgcaatggacgaaagtctgacgcagcgaca…
>CPR_MG_Amesbacteria_GCA_000402715.1
ttttttgagagtttgattctggctcaggatgaacgctggcggagtgccttaagcatgcaagtggaacgattaattgtt--------acaagacgaaagatagtcgcagacgggtgagtaatacataggaatctaccttttggtggggaatagctggtcgaaagaccaattaataccgcataagatcgcaagatgaaacct--------tgggagtaatcgccgatagaggagcctatgtcctatcagctagttggtggggtaatggcctaccaaggcgacgacgggtagctggactgagaggtcgatcagccacaatagcactgagacacgggctatacatctacggatggcagcaactgggaatattgcgcaatggacgaaagtctgacgcagcgact…
>CPR_MG_Amesbacteria_GCA_000997915.1
ttttttgagagtttgatcctggctcaggatgaacgctggcggagtgccttaagcatgcaagtgaaacgggtacgttcgtgc-----gcaccgaacgtactagtcgcagacgggtgagtaatacataggaatctacccattggtgtggaataactagccgaaaggctggctaataccgcataatctcgtgagagtaaaggg--------cgtaactgcccgccgatggaggagcctatgtcctatcagttagttggtggggtaatggcctaccaagactatgacgggtagctggactgagaagttggtcagccacaatagcactgagacacgggctatacatctacggatggcagcaactgggaatattgcgcaatggacgaaagtctgacgcagcgact…
>CPR_MG_Amesbacteria_GCA_001773615.1
ttttttgagagtttgatcctggctcaggatgaacgctggcggcgtgccttaggcatgcaagtggaacggtccggtgat--------aggggctatcggacagtcgcagacgggtgagtaatacataggaatctaccctttggtggggaataactagtcgaaagactggctaataccgcataacatctccggataaaaggc--------cgtaactggccgccgatggaggagcctatgtcctatcagctagttggtggggtaagagcctaccaaggcgatgacgggtagccggactgagaggtcggccggtcacaatagcacttagatacgggctatacatctacggatggcagcaaccgggaatattgcgcaatgggcgaaagcctgacgcagcgacg…
>CPR_MG_Amesbacteria_GCA_001775605.1
ttttttgagagtttgatcctggctcaggatgaacgctggcggcgtgccttaggcatgcaagtggaacggttcggtgat--------agaggctaccggacagtcgcagacgggtgagtaatgattaggaatctaccctatggtggggaatagctggccgaaaggccaattaataccgcataatcctactgaggaaaaggc--------cgtaactggccgccgatggaggagcctaattcctatcagctagttggtggggtaatagcctaccaaggcgatgacgggtagctggactgagaggtcggtcagccacaactgcactgagatacgggcagtacatctacggatggcagcaactaggaatattgcgcaatggacgaaagtctgacgcagcgacg…
>CPR_MG_Amesbacteria_GCA_001773775.1
ttttttgagagtttgatcctggctcaggatgaacgctggcggtgtgccttaagcatgcaagtggaacggatttgtttc--------caaga--g-aaatcagtcgcggacgggtgagtacaacgtaggaatctgcctaaaagtgtggaataactcgccgaaaggcgggctaataccgcatgtgatcgca-gattaaag--------ggaataacttctcgcttttagaggagcctacgccctatcagcttgttggtggggtaatggcctaccaaggcaatgacgggtagctggactgagaggtcggtcagccacaatagcactgagatacgggctatacatctacggatggcagcaactgggaatattgcgcaatggacgaaagtctgacgcagcgaca…
>CPR_MG_Amesbacteria_GCA_001001005.1
atttttgagagtttgatcctggctcaggatgaacgctagcggcgtgccttaagcatgcaagtggaacggtccgccttccgc-----aagggaggcgagatagtcgcagacgggtgagtaatacataggaatctaccctttggtggggaacaacttggcgaaagccgggctaataccgcataagatcgcaagatgaaaggg--------cgtaactgcccgccgaaggaggagcctatggcctatcagctagttggtggggtaaaggcctaccaaggcgatgacgggtagctggactgagaggtcggtcagccacaatagtactgagatacggactatacatctacggatggcagcaactgggaatattgcgcaatgggcgaaagcctgacgcagcgacg…
>CPR_MG_Amesbacteria_GCA_001773645.1
tttattgagagtttgatcctggctcaggatgaacgctggcggagtgccttaagcatgcaagtggaacggtcc-------g------cga----g--ggacagtcgcagacgggtgagtacagcataggaatctaccctggggtggggaataactcggcgaaagctgagctaattccgcataagcccgca-ggggaaag--------gccgtaactggccgccgaaggaggagcctatgtcctatcagctagttggtggggtaacggcctaccaaggcaatgacgggtagctggactgagaggtcggtcagccacaatagcacttagacacgggctatacatctacggatggcagcaactgggaatattgcgcaatggacgaaagtctgacgcagcgact…
>CPR_MG_Amesbacteria_GCA_001002325.1
ttttttgagagtttgatcctggctcaggatgaacgctggcggagtgccttaggcatgcaagtggaatgtcgataatcccg------caagggatgatcggcatcgcagacgggtgagtacagcgtaggaatttgcccaatggtggggaataactcgccgaaaggcgggctaataccgcataagatcgcaagatgaaaggc--------cgtaactggccgccgatggagaagcctacgtcctatcagctagttggtggggtaaaagcctaccaaggctatgacgggtagctggactgagaggttggtcagccacaatagcactgagacacgggctatacatctacggatggcagcaaccgggaatattgcgcaatggacgaaagtctgacgcagcgact…
>CPR_MG_Woesebacteria_GCA_001029755.1
---tttgaggatttgatcctggtccaggatgaacgctagcggtgtgctt-aagcatgcaagtgggacgg-tt--------------caa-------aactagtcgcgaacggctgagtataaaataggaatctacccaatggtgtggaataccttatcgaaagatgagctaataccacatgacctcgca-gagaaaag--------gacttaact-gccgccgatggatgagcctatttcccatcagtttgttgg
>CPR_MG_Woesebacteria_GCA_016700095.1
caatttgagggtttgatcctggcccaggacaaatgctggcggcgtgcttaaaaagttgaaagttggtggttt--------------ttgtgggttacgctagacgcgaacggctgagtaacacgtaggaatctacctcttggcggggaatagccatgggaaaccatggttaataccgcataagatcttcggatgaaagga--------tgtaactatccaccgagagaggagcctgcggcctatcagcttgttggtgaggtaatggctcaccaaggctacaacgggtaggggacgtgagagcgtgtacccccagaatggtactgagatacggaccatacacctacgggtggc-gcaaccaggaatcgtgcgcaatgggcgaaagcctgacgccgcgacg…
>CPR_MG_Woesebacteria_GCA_013426185.1
ctttttgagggtttgatcctggcccagggtgaacgctagcggcgtgcct-aggtttgataaagaaacggttttattttgtt-----tctgtcctgcggatagtcgcgaacggctgagtaacatgtaagaacctacccagaggtggggaatacccccgcgaaagcggggctaataccgcatacgctcgcaacagcaaaggg--------cgtaactgcccgcctgtggaggggcttgcacaccatcagctagttggtagggtaatggcctaccaaggctacgacggttaggggagatgagagtctgttcccccagaatgggactgagacacggcccatacacctacgggtggcagcaactgggaatcgtgcgcaatgggcgaaagcctgacgccgcgacg…
>CPR_MG_Woesebacteria_GCA_013374855.1
ctttttgagggtttgatcctggcccagggtgaacgctagcggcgtgccttaagcatgcaagtggaacgccctgaactt--------attctggttcagggagtcgcgaacggctgagtaacaagtaagaacctacccacaagtgaggaataccctgccgaaaggcaggctaataccgcataatctcacatgagtaaaggg--------cgtaactgcccgcttgtggaggggcttgctcaccatcagctagttggtggggtaatggcctaccaaggctacgacggttaggggagatgagagtctgaccccccagaatgggactgagacacggcccatacacctacgggtggcagcaactgggaatcgtgcgcaatgggcgaaagcctgacgccgcgacg…
>CPR_MG_Woesebacteria_GCA_013374835.1
ctttttgagggtttgatcctggcccagggtgaacgctggcggcgtgcattaggcatgcaagtggaacggtccg----------------tttaatcggacagtcgcgaacggctgagtaacgggtaggaatctaccccttggtggggaatacctccgcgaaagcggggttaataccgcataaacttgcacaagaaaagag--------cgtaactgctcgccgagggaggagcctgcctcccatcagcttgttggtagggtaacggcctaccaaggctacgacgggtagggggcgtgagagcgtggccccccagaatggcactgagacacgggccatacacctacgggtggcagcaactaggaatcgtgcgcaatgggcgaaagcctgacgccgcgacg…
>CPR_MG_Woesebacteria_GCA_001793185.1
ctttttgagggtttgatcctggcccaggatgaacgctggcggcgtgctttaagcatgcaagtggaacgaacc-agctt---------------g--gggaagtcgcgaacggctgagtaacacgtaggaatctaccccttggcggagaatacctcactgaaaggtgagttaatactgcataaccctg-a-agggaaag--------ggcgtaactgcccaccgagggaggagcctgcggcccatcagcttgttggtagggtaatggcctaccaaggcaacgacgggtaggggacgtgagagcgtgatcccccagaatggtactgaga-acggaccatacacctacgggtggcagcaactgggaatcgtgcgcaatggacgaaagtctgacgccgcgacg…
>CPR_MG_Woesebacteria_GCA_001793475.1
ctttttgagggtttgatcctggcccagggtgaacgctggcggcgtgccttaggcatgcaagtggaacg--ctt----------------gcaag-aagagagtcgcgaacggctgagtaacacgtaggaatctgcctcttggtgtggaatagtccaccgaaaggtggggtaataccgcataagatc-c--gatgaaag--------ggtttaaccgcccgccgagagaggagcctgcggcccatcagcttgttggtagggtaatggcctaccaaggctacgacgggtagggggcgtgagagcgtggccccccagaatgggactgagacacggcccatacatctacggatggcagcaaccgggaatcgtgcgcaatgcaggaaactgtgacgccgcgacg…
>CPR_MG_Woesebacteria_GCA_000999115.1
aaatttgagggtttgatcctggcccagggtaaatgctggcggcgtgcattaggcatgcaagtaaaacggtccctcacc--------aaattgtgagggaaagttgcgaacggctgagtacaaagtaggaatctaccttttagtggggaatagctcccggaaacgggaattaataccgcatgtggtctatggaccaaaggg--------cgtaactgctcgctagaagatgagcctacttcccatcagcttgttggtagggtaatggcctaccaaggcttcgacgggtaggggacgtgagagcgtgtacccccagagtggcactgagatacgggccacactcctacgggaggcagcaaccgggaatcgtgcgcaatggacgaaagtctgacgccgcgacg…
>CPR_MG_Woesebacteria_GCA_001793235.1
ttaattgagggtttgatcctggcccagggtaaacgctggcggcgtactttatgcatgcaagtagaacggttccggctt---------------g--gaacagttgcgaacggctgagtaacacgtagggatctacccattggtgtggaatagtccaccgaaaggtggggtaataccgcataatcccgca-gggcaaag--------ggcttaactgcccgccgatggaggaacctgcgcaccatcagtttgttggtgaggtaatggcttaccaagactacgacggttagggggcgtgagagcgcgtacccccagaataggactgagacacggcctatacacctacgggtggcagcaacagggaatcgtgcacaatggacgcaagtctgatgccgtgacg…
>CPR_MG_Woesebacteria_GCA_001793025.1
ttatttgagggtttgatcctggcccaggatgaacgctagcggcgtgctttaggtatgcaagtggaacggctcgtgcgg---cttaacgctctgcgtgagcagtcgcgaacggctgagtaacacgtaggaacgtaccttctagtggagcatagctcctcgaaagagggggtaattctccatacggtggtaatatcaaagag--------agtaacttctcgctggaagagcggcctgcggcctatcagctagttggtagggtaacggcctaccaaggcaatgacgggtagggggcgtgagagcgtgtacccccagaatggcactgagaaacgggccatacacctacgggtggc-gcaaccgggaatcgtgcgcaatgggcgaaagcctgacgctgcgacg…
>CPR_MG_Woesebacteria_GCA_001792515.1
taatttgagggtttgatcctagcccaggatgaacgctagcggcgtgcttaaaatttctaattcggttgggtt-atttt--------tctatcctgcggacagacgcgaacggctgagtaacacgtaaggacttgcctcttggtgtggaatagcccatcgaaagatggggtaataccgcatgaggccgtagagttaaagga--------cgtaactgtccgccgagagagagtcttgcggcctatcagctagttggtagggtaacggcctaccaaggctacgacgggtagggggagtgagagctcgaacccccagaatggcactgagatacgggccatacacctacgggtggc-gcaaccgggaatcgtgcgcaatggacgaaagtctgacgccgcgacg…
>CPR_MG_Woesebacteria_GCA_001793015.1
ctatttgaggatttgatcctggtccaggacgaacgctagcggcgtgccttaggcatgcaagtgggtcggttctgtcc----------------t--ggacagacgcgaacggctgagtaacacgtaggaacctacccattggttgggaatagtccaccgaaaggtggggtaataccgaataagtcccga-ggagaaag--------ggcataactgcccgccgatggaggggcctgcggcctatcagctagttggtggggtaacggcctaccaaggctacgacgggtagggggcgtgagagcgtgatcccccagaatggcactgagatacgggccatacacctacgggtggcagcaaccgggaatcgtgcgcaatggacgaaagtctgacgccgcgacg…
>CPR_MG_Woesebacteria_GCA_001793395.1
ccatttgagggtttgatcctggcccagggtgaacgctggcggcgtgctttaagcatgcaagtagaacgg-cc-atttt--------caa----g--gg-gagttgcgaacggctgagtaacacgtaagaacgtacctcgtagtgtggaataaccccgcgaaagcggggtcaataccgcatagtctcgca-gagtaaag--------cgcataact-gccgccatgagagcggcttgcggcccatcagcttgttggtagggtaacggcctaccaaggctacgacgggtaggggatgtgagagcatgaccccccagaataggactgagacacggcctatacacctacgggtggcagcaactgggaatcgtgtgcaatgggcgaaagcctgacaccgcgacg…
>CPR_MG_Woesebacteria_GCA_001792115.1
ctttttgagggtttgatcctggcccaggatgaacgctagcggcgtgccttaggcatgcaagtagagcgggcct----------------cgcaagaggtcagctgcgaacggctgagtacaagataagtatctaccccttggcggggaatacctactcgaaagagtagctaataccgcataagaccgcaaggtgaaagga--------cgtaactgtccaccgagggaggagcttatcgcccatcagcttgttggtagggtaacggcctaccaaggctacgacgggtaggggacgtgagagcgtgaccccccagaataggactgagacacggcctatacacctacgggtggcagcaaccgggaatcgtgcgcaatggacgaaagtctgacgccgcgacg…
>CPR_MG_Woesebacteria_GCA_001793695.1
ctttttgaggatttgatcctggtccaggatgaacgctggcggcgtgcctaagaagttgaaggttggtagttt--------------ttgtgagttgcgcgagccgcgaacggctgagtatatggtaagaatctacctcttggtaaagaatacctcaccgaaaggtgagctaatactatataagatcgtaagatgaaagga--------cgtaactgtccgccgagaaatgagcttacttcccatcagcttgttggtagggtaatggcctaccaaggctacgacgggtaggggacgtgagagcgtgaccccccagaacgggactgagacacggcccgtacacctacgggtggcagcaactaggaatcgtgcgcaatggacgaaagtctgacgccgcgacg…
>CPR_MG_Woesebacteria_GCA_000996165.1
ctatttgagggtttgatcctggcccaggattaacgctggcggcatgcctaatgcatgcaagtagaacgg-tt--------------caa-------aactagttgcgaacggctgagtaatggataggaatttccccaatggtgtggaatacctcatcgaaagatgagctaataccgcatgacctcg-a-gagaaaag--------cgcttaact-gccgccgatggatgagcctatctcccatcaggctgttggtagggtaatggcctaccaaacctatgacgggtagggggcgtgagagcgcgttcccccagaatgggactgagacacggcccatacacctacgggtggcagcaacagggaatcgtacgcaatggacgaaagtctgacgtcgcaatg…
>CPR_MG_Blackburnbacteria_GCA_001816475.1
ttttttgagggtttgatcctggcccaggacgaacgctagcggcgcgctttaagcatgcaagtcgagcgattc--------------cgacaagtcgggatagcggcagacggctgagtaacacgtcggaatctactctttggtgggggatagccccgcgaaagcgggggtaataccgcataatctcgca-gagcaaag--------gacttaacggtccaccgaagaaagagccggcggcctatcagctagttggtggggtaacggcctaccaaggctataacgggtagggggtgttagagcacggccccccagaatgagactgagacacggctcatacacctacgggtggcagcaactgggaatcgtggacaatggacgcaagtctgatcccgcgacg…
>CPR_MG_Blackburnbacteria_GCA_001816385.1
ttaattgagggtttgatcctggcccaggacgaacgctagcggcgtgccttaggcatgcaagtcgagcgggccgccccc--------taagggggcgagccagcggcagacggctgagtaatacgcagggacataccccagagtggaggatagctcaccgaaaggtgtggtaatactccataccatcgca-gatgaaag--------ttcttaacggggcgctcagggagtgacctgcggcctatcagctagttggtggggtaacggcctaccaaggctacgacgggtaggggatgtgagagcatgatcccccagaatgggactgagacacggcccatacacctacgggtggcagcaactgggaatcgtacgcaatggacgaaagtctgacgtcgcgacg…
>CPR_MG_Blackburnbacteria_GCA_001816455.1
atttttgagggtttgatcctggcccaggacgaacgctagcggcgtactttaagcatgcaagtcgaacggtcccacgtc--------gagctatgcgggatagtggcggacggctgagtaatacgtaggaacgtaccccagagtgagggatagcttgccgaaaggcggggtaatacctcatatcatcgca-gatgaaag--------ccctttacggggcgctcagggaacggcctgcggcctatcagctagttggtggggtaatggcctaccaaggcgatgacgggtagggggtgtgagagcatgaccccccagagtggtactgagacacggaccacacacctacgggtggcagcaactgggaatcgtacgcaatggacgaaagtctgacgtcgtgacg…
>CPR_MG_Beckwithbacteria_GCA_001029675.1
ttttttgagagtttgatcctagctcaggataaacgctggcggcgtgccttaggcatgcaagtcgaatgcaga-----------------cgcaagtcgtgcatggcagacgggtgagtaacgcgtaggaatctaccccttggtgtggaataaccccgagaaatcggggataataccgcataagttctccggaagaaaggc--------cataactggccgccgagggaggagcctgcgtcctatcagcttgttggtgaggtaatggctcaccaaggctataacgggtagggggcgtgagagcgtgtccccccacaaggtcactgagacacggggcctacacctacgggtggcagcaactaggaattttgcgcaatgggcgaaagcctgacgcagcgacg…
>CPR_MG_Collierbacteria_GCA_001002205.1
ctttttgagagtttgatcctggctcaggatgaacgctggcggcgtgccttaagcatgcaagtcgaacgattctagtagc----------aatactaatttagtggcagacgggtgaggaatatacaggaatctacctcttggtgggggatagctcgccgaaaggcggggtaataccccatgaggtctacggatcaaagac--------cttaactggtcgccgggagaggagcctgtatcctatcagctagttggtgaggtaatggctcaccaaggctacgacgggtagggggcgtgagagcgtggccccccacaaggacactgagacacgggtcctacacctacgggtggcagcaactgggaatcttgcgcaatggacgaaagtctgacgcagcgacg…
>CPR_MG_Collierbacteria_GCA_009936135.1
tttaatgagagtttgatcctggctcaggatgaacgctggcggcgtgccttaggcatgcaagtcgaacgaaaa--------------gtagcaatacttttagtggcagacgggtgagtaacacgtaggaatctaccctttggtgaggaataacggttcgaaaggaccgctaataccacataagtccgtaaggagaaagac--------cgtaactggtcgccgatggaggagcctgcgtcctatcagcttgttggtgaggtaatggctcaccaaggctatgacgggtagggggcgtgagagcgtggccccccacaaggacactgagacacgggtcctacacctacgggtggcagcaaccgggaatattgcgcaatggaggaaactctgacgcagcgacg…
>CPR_MG_Collierbacteria_GCA_000404945.1
ttttttgagaatttgatcctagttcaggatgaacgctggcattgtgccttaagcatgcaagttgaacggatc-gtttc-a------caaggaag-aagtcagtggcagacgggtgagtacaaagtaggaatctacctcttagtggggaacagctcgccgaaaggcggggtaataccgcataagttcgta-gaagaaag--------ggcttaaccgcccgctgagagatgagcctgctcgctatcagctagttggtagggtaatggcctaccaaggcgacgacggctagggggcgtgagagcgcgaccccccacaaggttactgagatacggagcctacacctacgggtggcagcaactgggaattttgcgcaatggacgaaagtctgacgcagcgaca…
>CPR_MG_Collierbacteria_GCA_000998275.1
ttaattgagaatttgatcctggttcaggatgaatgctggcagtgtaccttaagcatgcaagtcgaacggatc--------------caagg----aaatcagtggcagacgggtgag-gattgacaggaacctaccttttgttggggaatagctcgccgaaaggcgagataataccgcataagatcgca-gatgaaag--------gccttaaccggccgacgatagatgggcctgtttgctatcagctagttggtgaggtaatggctcaccaaggctatgacggctaggggacgtgagagcgtggtcccccacaatgttacttagacacggaacatacacctacgggtggcagcaactgggaattttgcacaatggacgaaagtctgatgcagtgaca…
>CPR_MG_Collierbacteria_GCA_001872005.1
ttttttgagaatttgatcctggttcaggacgaacgctggcagtgtaccttaagcatgcaagtcgaacggacc--------------caagg--g-ggagcagtggcagacgggtgag-gaaagacaggaatctacctttttgtggggaatagtcccgcgaaagcgggattaataccgcataagtccgca-ggagaaag--------gccttaaccggccgcagaaagatgagcctgttcgctatcagctagttggtaaggtaatggcttaccaaggctatgacggctagggggtgtgagagcacggccccccacaatgttacttagacacggaacatacatctacggatggcagcaactgggaattttgcacaatggacgaaagtctgatgcagtgaca…
>CPR_MG_Collierbacteria_GCA_001774675.1
ttttttgagaatttgatcctggttcaggacgaacgctggcagtgtaccttaagcatgcaagtcgaacggtgaagtctt--------gctagagatggagcagtggcagacgggtgaggaa-agacaggaatctacctttttgtggggaatagctggccgaaaggccaattaataccgcataagtccgcaaggagaaaggc--------cttaaccggccgcagaaagatgagcctgttcgctatcagctagttggtaaggtaatggcttaccaaggctatgacggctagggggcgtgagagcgtggccccccacaatgttacttagacacggaacatacatctacggatggcagcaactgggaattttgcacaatggacgaaagtctgatgcagtgaca…
>CPR_MG_Chisholmbacteria_GCA_001816915.1
atttttgagagtttgatcctggctcaggatgaacgctggcggcgtgccttaggcatgcaagtcgaacgggtc--------------cgagcaatcggacaagtggcagacgggtgagtaacgcgtaggaacctaccccttggcggggtatagccagccgaaaggctgggtaataccgcataatcttttcggagcaaaggc--------cgtaactggccaccgagggaggggcctgcgtcctatcagcttgttggtggggtaacggcctaccaaggctatgacgggtagggggcgtgagagcgcggccccccacaaggtcactgtgatacgggacctacacctacgggtggcagcaactaggaatattgcgcaatgggcgaaagcctgacgcagcgacg…
>CPR_MG_Pacebacteria_GCA_001803415.1
ttttttgagaatttgatcctggttcaggatgaacgctggcggtgtgctttaggcatgcaagtcgagcggttc--------------ggcgcaagccgaacagcggcggacgggtgcgtaacacgtaggaatctacctcttggtggggaatagcccggcgaaagccggggtaataccgcgtaaactccggggagaaaaggg--------cgtaactgcccgccgagagaggagcctgcggcctatcagcttgttggtggggtaatggcctaccaaggcgatgacgggtagggggcgtgagagcgcgaccccccacaaggtcactgagacacggggcctacatctacggatggcagcaaccaggaatcttgcgcaatggacgaaagtctgacgcagcgaca…
>CPR_MG_Pacebacteria_GCA_001803505.1
tttcttgagagtttgatcctggctcaggatgaacgctggcggtgtgccttaagcatgcaagtcgaacgagggaagtttttc-----ggaagaatggaactagtggcagacgggtgagtaacgcgtagaaatctacctcttggtggggaatagcctcgcgaaagcgaggataataccgcataacatctacggataaaagcg--------cctaaccgcgcgccgagagaggagtctgcgtgctatcagctagttggtagggtaatggcctaccaaggcgatgacggctagggggcgtgagagcgcgaccccccacaaggtcactgagacacggggcctacatctacggatggcagcaactgggaatcttgcgcaatgggcgaaagcctgacgcagcgaca…
>CPR_MG_Pacebacteria_GCA_001803465.1
ttttttgagagtttgatcctggctcaggatgaacgctggcggtgtgcttaaggtatgcaaatcgagcgg-cccctctttttttccttgaaaagagtgggcagcggtgaacgggtgagtaatgcgtaggaatctacctcttggtggggaatagctcgccgaaaggcggggtaataccgcgtaagtacgca-gttgataggc--------cgtaactggccgccgagagatgagcctgcgtgctatcagcttgttggtagggtaatggcctaccaaggcgatgacggctagggggcgtgagagcgcgatcccccacaaggtcactgagacacggggcctacacctacgggtggcagcaatcgggaatcttgcgcaatgggcgaaagcctgacgcagcgaca…
>CPR_MG_Pacebacteria_GCA_001000345.1
ttttttgagaatttgatcctggttcaggatgaacgctggcggtgtgccttaagcatgcaagtcgaacgg-tttacttt---cgctccaaaa--g-agg-cagtggcagacgggtgagtaatacgtaggaacctacctctttgtgggggacagctcgccgaaaggcggggtaataccgcatgtgatcgca-gatcaaag---------ccgta---aggcgcgaagagaggggcctgcgtcccatcagctagttggcggggtaaacgcccaccaaggcaacgacgggtagccggtgtgagagcatggccggccacaaggtcactgagacacgggacctacacctacgggtggcagcaactgggaatcttgcgcaatggacgaaagtctgacgcagcgaca…
>CPR_MG_Pacebacteria_GCA_001001445.1
ttttttgagaatttgatcctggttcaggatgaacgctggcggtgtgccttaagcatgcaagtcgtgcgggttt-------------caa-------aatcagcggcaaacgggtgagtaacgcgtagggatctaccttttcgtgggggatagctcgccgaaaggcggggtaataccgcatgtgatcgcg-gatgaaag---------tcgta---ag-cgcgaaaagaggaacctgcgccccatcaggttgttggcggggtaatagcccaccaagcctatgacgggtagccggagtgagagctcgatcggccacaaggtaactgagacacggtgcctacacctacgggtggcagcaactgggaatcttgcgcaatggacgaaagtctgacgcagcgaca…
>CPR_MG_Pacebacteria_GCA_001872335.1
ttttttgagagtttgatcctggctcaggatgaacgctggcggtgtgctttaggcatgcaagtcgaacggtaacaggtctag-----actagatgctgacgagtggcgaacgggtgagtaacacgtaggaatctacctagtagcgggggatagcccatcgaaagatgggataataccgcataagcccttacggggaaag------------catttatgcactattagaggagcctgcgcgctatcagttagttggtggggtaatggcctaccaagactacgacggctagccgatgtgagagcatgatcggccacaaggttactgagacacggaacctacacctacgggtggcagcaaccgggaatattgcgcaatggacgaaagtctgacgcagcgaca…
>CPR_MG_Pacebacteria_GCA_001873435.1
ttatttgagagtttgatcctggctcaggatgaacgctggcggtgtgccttaggcatgcaagtcggacgggatttacacct------tcgggtgtaatgagagtggcagacgggtgagtaacgcgtagatatctaccttatagtaaggaatagctcatcgaaaggtggggtaataccatatagttccctcagggtaaaggc-------t-----tcggccgctataagaggagtctgcgtcctatcaggcagttggtggggtaatggcctaccaaacctatgacgggtagccggtgtgagagcacgaccggccacaaggtcactgagacacgggacctacatctacggatggcagcaaccgggaattttgcgcaatgggcgaaagcctgacgcagcgaca…
>CPR_others_Kazan_GCA_001029795.1
atttttgagagtttgatcctggctcaggattaacgctggcggcatgcctaacacatgcaagtcgaatgccgccaattt---tttgcctttaaattggcggcatggcggacggctgagtaacgcgtgggaacttacctctaagttgggtataacctgccgaaaggcgggataatccccaatgtcccc-cagcgggaaag--------------atttatcgcttagagagaggcctgcgttcgattagcttgttggtggggtaatggcctaccaaggctctgatcgatagggggctttagagggtgaccccccagactgggactgagacacggcccagactcctacgggaggcagcagtgagggattttccgcaatggacgaaagtctgacggagcaatg…
>CPR_others_Kazan_GCA_001771215.1
ttttttgagagtttgatcctggctcaggattaacgctggcggcatgcctaacacatgcaagtcgaatgcccagtgcgt---tctctcttcgcattggtagcatggcagacggctgagtaacgcgtgggaacttacctctaagttgggtataacctgccgaaaggcgggataatccccaatgtgttcgcaagaacaaag--------------att-atcgcttagagagaggcctgcgtccgattagcttgttggtggggtaatggcctaccaaggcactgatcggtagggggcttgagagggtgaccccccagactgggactgagacacggcccagactcctacgggaggcagcagtgagggattttccgcaatggacgaaagtctgacggagcaatg…
>CPR_others_Kazan_GCA_001772255.1
ttttttgagagtttgatcctagctcaggatgaacgctggcggcatgcctaacacatgcaagtcgaatgccgccaattt---tcctcctttaaattggcggcatggcagacggctgagtaacgcgtgggtatctacccttgggtcgggcataacccatcgaaaggtgggataattcccgatggtctcttttgagtaaag--------------atttattgcccagggaggaacctgcgtccgattagcttgttggtagggtaacggcctaccaaggcgatgatcggtagggggcttgagagggtgaccccccagactgggactgagacacggcccagactcctacgggaggcagcagtgaggaatattgcgcaatgggcgaaagcctgacgcagcgatg…
>CPR_others_Kazan_GCA_001771275.1
ttttttgagagtttgatcctggctcaggattaacgccggcggcatgcctaacacatgcaagtcgagtg-actt--------------------g--ggtgcacggcagacggctgagtaacgcgtgggaacatacccttgggtcgagcataacctgccgaaaggcaggataattctcgatagtctcgcatgagtaaag--------------atttatcgcccaaggagtggcctgcgttcgattagctagttggtagggtaatggcctaccaaggctgtgatcgatagttggtctgagaggatgaccagccagactgggactgagacacggcccagactcctacgggaggcagcagtgaggaattttgcgcaatggacgaaagtctgacgcagcaatg…
>CPR_others_Berkelbacteria_GCA_000993135.1
tttttggagagtttgatcctggctcaggacgaacgttggcggtgcgcctaacacatgcaagtcgaacggccct--------------------tcggggcagtggcgaacggctgagtaatactggagaacttacctcaaagtagggcatagcccatcgaaagatggggtaataccctatagtctcaattgagtaaag--------------atttatcgctttgagaaaggctcctggcctatcagcttgttggtgaggtaatagctcaccaaggctacgacgggtagctggtctgagaggatgatcagccagaccgggactgagacacggcccggactcctacgggaggcagcagttgggaatcttgcgcaatgggcgaaagcctgacgcagcgaca…
>CPR_others_Berkelbacteria_GCA_001776195.1
cacacggagagtttgatcctggctcaggattaacgttggcagcgtgcctaacacatgcaagtcgaacgat----------------------------atagtggcagacgagagagt-ataagcaagaacttacccccgagtgaaggatagccagccgaaaggctgggtaatcctgcataatctcgaaagagcaaaggagca---cacgtagctgggcgcttggggagaggccttgcccctatcagctagttggtgaggtaatggctcaccaaggcgatgacgggtagctggtctgagaggatgatcagcctcgatgggactgagacacggcccatactcctacgggaggcagcagttgggaattttgcacaatggaggcaactctgatgcagcaacg…
>CPR_others_Berkelbacteria_GCA_001872015.1
ttatttgagagtttgatcctggctcaggattaacgttggcagtgcgcctaacacatgcaagtcgagcggtcgcatctcatttttttaagcgagatgcgacagcggcagacgagagagtaatagtaaggaacttacccccgagtgaaggatagccccgcgaaagcgggagtaatcctgcataatctcgcaagagcaaag------------ccttcgggcgcttggggagaggccttactcctatcagcttgttggtgaggtaacggctcaccaaggcgatgacgggtagctggtctgagaggacgatcagcctcgatggaactgagatacggtccatactcctacgggaggcagcagttggggattttgcacaatgggcgaaagcctgatgcagcgaca…
>CPR_others_Berkelbacteria_GCA_001774395.1
tattatgagagtttgatcctggctcaggatgaacgctggcggcgtgcctaatacatgcaagtcgaatgaacctgcttttgttatgccaagagagg-gg-gcatggcgaacgggtgagtaatgcacaagaacgtgctccgaagttggggataacccctcgaaagagggaataacactcaatggtcccacatgggtaaaa--------------atttattgcttcggaagcggcttgtgtcctatcagctagttggtgaggtaatggcttaccaaggcgatgacgggtagctggtctgagaggacgatcagccacagtggaactgagatacggtccacactcctacgggaggcagcagtagggaattgtcggcaatgggcgaaagcctgaccgcgcgacg…
>CPR_others_Berkelbacteria_GCA_001872655.1
tttttggagagtttgatcctggctcaggatgaacgctggcggcgtgcctaacacatgcaagtcgaatggccccgtttt---ctgctttctgtcttctgatcatggcgaacgggtgagtaatgcgcagaaacctgcaccaaaccgggaaatacccagccgaaaggttgaataatgtcccatatgtgtatcacataaaaa--------------ttccggtggtttgggaagggtctgcgtcctatcagcttgttggtgaggtaatggcttaccaaggctacgacgggtagctggtctgagaggatgatcagccacaataggactgagacacggcctatactcctacgggaggcagcagttgggaatcgtacgcaatggacgaaagtctgacgtcgcgacg…
>CPR_others_Berkelbacteria_GCA_001872695.1
tttattgagagtttgatcctggctcaggacgaacgctggcggcgtgcctaacgcatgcaagtcgaatgccgat--------------------ttatcggcatggcgaacgggtgagtaacgcgtagaaatctaccccaaagtctcgcataacccttcgaaagttgggataatacgagatagtctcgc-gcagtaaag--------------atttatcgctttgggatgagtctgcgtcctatcagcttgttggcggggtaagagcccaccaaggcaatgacgggtagctggtctgagaggatgatcagccacaatggaactgagacacggtccatactcctacgggaggcagcagctgggaatattccgcaatggacgaaagtctgacggagcgacg…
>CPR_others_Berkelbacteria_GCA_000991185.1
ttttttgagagtttgatcctggctcaggacaaacgctggcggtatgcctaacacatgcaagtcgaacggctgtgcgtag--tttttgtgctatgcacggtagtggcaaacgggtgagtaacacgtagaaacatacccttatctcggacatagcccaccgaaaggtggattaatttccgatagtctc-cgggattaaag--------------a-atttcggataaggaatggtctgcgtcctatcagctagttggtgaggtaatggctcaccaaggcgacgacgggtagctggtctgagaggatgatcagccacaatggaactgcgacacggtccatactcctacgggaggcagcagtggggaattttgcgcaatgggcgaaagcctgacgcagcaata…
>CPR_others_Berkelbacteria_GCA_001774375.1
ttttttgagagtttgatcctggctcaggacgaacgctggcggcgtgcctaacacatgcaagtcgtacgg----------------------aga-agg-gggtggcgaacgggtgagtaaaaggcgataagctagctcaagatataaaaggcctaaataaatacccaaaacgtgttagatgaccccgtacgactgaag--------------acc--tcgattctacaagtattagaattttatcgatataatacgccgacactccccgcccagggcggggaaagaagatatagtctacactactagtaatagta----gataaagtgacggtccatacacctacgggtggcagcagttgggaatattgcacaatgggcgacagcctgatgcagcgacg…
>CPR_others_Berkelbacteria_GCA_001029735.1
atttttgagagtttgatcctggctcaggacgaacgctggcggcgtgcctaacacatgcaagtcgtacgctt----------------------gtaaaagcgtggcgaacgggtgagtaatagcaaggaacgtgcctttttccgggaaatacccagccgaaaggttggctaatgtcccatagtctcgcaagagtaaag--------------ctccggcggaaaaagatcggccttgttcctatcagctagttggtaaggtaacggcttaccaaggctatgacgggtagctggtctgagaggatgatcagccacatggggactgagacacggccctaacacctacgggtggcagcagttgggaatattgcacaatgggcgacagcctgatgcagcgacg…
>CPR_Sa_Saccharibacteria_GCA_002952755.1
tttttggagagtttgatcctggctcaggatgagcgctggcggcgtgcctaatacatgcaagtcgagcggtaaggcctc--------ttcggaggtacacgagcggcggacggctgagtaacacgtaggaacgtaccccaaagtgagggataactgctcgaaagagtagctaataccgcatgtgatctccggattaaag--------------cttatgcgctttgggaacggcctgcgtccgattagcttgttggtgaggtaaaagcttaccaaggcgacgatcggtagctggtctgagaggatgatcagccagactgggactgagacacggcccagactcctacgggaggcagcagtagggaattttccacaatgggcgaaagcctgatggagcaacg…
>CPR_Sa_Saccharibacteria_GCA_005697215.1
ttaacggagagtttgatcctggctcaggatgaatgctggcggcgtgcctaacacatgcaagtcgagcggcagcgggtt---ttcaagcagaatgccggcgagcggcgaacggctgagtaacgcgtaggaatttgccccaaagtgagggataactgcccgaaagggtagctaataccgcatatggtcttcggattaaag------------gatttatccgctttgggagaagcctgcgttggattaggttgttggtgaggtaatggctcaccaagccgacgatccatagctggtctgagaggatgatcagccagactggaactgagacacggtccagactcctacgggaggcagcagtgaggaatcttccacaatgggcgaaagcctgatggagcaacg…
>CPR_Sa_Saccharibacteria_GCA_016700315.1
tttttggagagtttgatcctggctcaggatgaacgctggcggcgtgcctaatacatgcaagtcgaacggaaacatgtt---tttcatgagaatgatgtcgagtggcggacggctgagtaacgcgtaggaacgtaccccaaagtgagggataagcaccagaaatggtgtctaataccgcatatggtcttcggattaaag------------ccttcgggcgctttgggaacggcctgcgtaagattagctagttggtgaggtaatggctcaccaaggcgacgatctttagctggtctgagaggatgatcagccagactgggactgaga-acggcccagactcctacgggaggcagcagtagggaattttccacaatgggggcaaccctgatggagcaacg…
>CPR_Sa_Saccharibacteria_GCA_016699895.1
ttaatggagagtttgatcctggctcaggatgaacgctggcggcatgcctaacacatgcaagtcgagcggcagcatgct---cgttttgtgagtgatggcgagcggcggacggctgagtaacgcgtgggaatccaccccaaagtgagggataacgcaccgaaaggtgtgctaataccgcatatggtcttcggattaaag--------------ttttaacgctttgggaggagcccgcgtcggattagatagttggtgaggtaatggctcaccaagtcgacgatccgtagctggtctgagaggatgatcagccagactggaactgagatacggtccagactcctacgggaggcagcagtgaggaatattccacaatgggcgaaagcctgatggagcaatg…
>CPR_Sa_Saccharibacteria_GCA_003516025.1
tttttggagagtttgatcctggctcaggatgaacgctggcggcgtgcctaatacatgcaagtcgagcggtaacaggct---tattatgagagtgctgacgagcggcggacggctgagtaacgcgtaggaacgtaccccaaagtgagggataagcaccagaaatggtgtctaataccgcatgtgatcttcggattaaag--------------cttcggcgctttgggaacggcctgcgtaagattagcttgttggtgaggtaatggctcaccaaggcgacgatctttagctggtctgagaggatgatcagccagactgggactgagacacggcccagactcctacgggaggcagcagtagggaattttccacaatgggcgaaagcctgatggagcaacg…
>CPR_Sa_Saccharibacteria_GCA_001790595.1
tttttggagagtttgatcctggctcaggattaacgctggcggcgtgcctaatacatgcaagtcgaacgacagtgcttc---tttcctgaggagtatatggagtggcggacggcagagtaacgcgtaggaacgtaccccgaagtgagggataagcaccggaaacggtgtctaataccgcatgcggtc-tagcatcaaag------------ccgcaaggcgctttgggagcggcctacgtccgattagcttgttggtgaggtaatagctcaccaaggcgacgatcggtagctggtctgagaggatgaccagcctgactgggactgaga-acggcccagactcctacgggaggcagcagtagggaatcttgcgcaatggacgaaagtctgacgcagcaacg…
>CPR_Sa_Saccharibacteria_GCA_000169295.1
tttatggagagtttgatcctggctcaggatgaacgctggcggcgtgcctaatacatgcaagtcgtgcggcagcgcgagtag-----actacttggcggcgagcggcgaacggctgagtaacgcgtaggaatgtaccccaaagtgagggataagctccagaaatggagtctaataccgcatatggtcttcggattaaag--------------cttgagcgctttgggaacagcctgcgtccgattaggttgttggtgaggtaatggctcaccaagccgacgatcggtagctggtctgagaggatgaccagccagactggaactgagacacggtccagactcctacgggaggcagcagtaaggaatcttccacaatgggggcaaccctgatggagcaacg…
>CPR_others_CPR2_GCA_000995395.1
cttttggagagtttgatcctggctcaggatgaacgctggcggcgtgcttaacacatgcaagtcgaacggccct--------------------tcggggcagtggcagacgggtgagtaacgcgttggtacttaccccaaagtggggaataacctgccgaaaggtgggctaataccgcatagtatcgtaagattaaag--------------cctgggcgctttgggataggcctgcgacttatcagctagttggtgaggtaactgctcaccaaggctaagacgagtagctggtttgagaggatgatcagccacactgggactgagacacggcccagactcctacgggaggcagcagtgaggaattttccgcaatggacgaaagtctgacggagcgacg…
>CPR_others_Abawacabacteria_GCA_001773455.1
ttctaaaagagtttgattctggctcaggattaacgctggcggtatgcataacacatgcaagtcgaacgaggatattttcccttgctggggaaataagccgagtggcgaacgagagagtaatacgttggtaccttccctatactcaggaataactccgcgaaagcggagctaatgccggatgaccatgtaacatggaaa--------------gtttttcggtataggaggggcctacggcctatcagctagttggcgagataaaagctcaccaaggctatgacgggtagctggtctgagaggacgaccagcctcgctgggactgagacacggcccagactcctacgggaggcagcagtgaggaattttccacaatggacgaaagtctgatggagcaata…
>CPR_Pe_Peregrinibacteria_GCA_001873565.1
ttattggagagtttgatcctggctcaggattaacgctggcagtgtgtataatacatgcaagtcgagcgccccgcactt---ttatcggtagtgtgcggggagcggcaaacgggtgagtaacacgttggaatctgccccgaactcagggatagcccaccgaaaggtggattaataccggatggtcccgtaagggtaaag--------------cttttgcggtttgggaggagcctgcgtagtatcagcttgttggtgaggtaatggctcaccaaggctatgacgcttagctggtctgagaggatgaccagtcacaatgggactgagacacggcccatactcctacgggaggcagcagtagagaatctttcgcaatgggggaaaccctgacggagcaaca…
>CPR_Pe_Peregrinibacteria_GCA_016699755.1
caacaaaagagtttgatcctggctcaggatgaacgctggcgggatgcctaacacatgcaagtcgagcggcagcacttcg--------------ggtggcgagcggcgaacggctgaggaacacgttggtacctcccccgaactcagggataagcccgagaaatcgggtctaataccggatgccccagtaatgggaaag--------------atttatcggttcgggaagggcctgcggcgtatcagcttgttggtgaggtaacggctcaccaaggctatgacgcgtatctggtgtgagagcacgaccagacagagtgggactgagacacggcccacactcctacgggaggcagcagtgaggaattttccacaatgggcgaaagcctgatggagcaatc…
>CPR_Pe_Peregrinibacteria_GCA_016699515.1
tttatgaagagtttgatcctggctcaggatgaacgctagcggtgcgcctaacacatgcaagtcgagcgcccccacttt---ttattaaggtagggtggggagcggcgaacgggtgagtaacacgttggaacctaccccgaactcagggataactcgccgaaaggcggactaataccggatagtccc--aagggtaaag--------------atttatcggtttgggaggggcctgcgcaatatcagctagttggtgaggtaatagctcaccaaggctatgacggatagttggtctgagaggacgacccgccacaatggaactgagacacggtccatactcctacgggaggcagcagtgaggaatcttccgcaatgggcgaaagcctgacggagcgacg…
>CPR_Pe_Peregrinibacteria_GCA_000993595.1
tttatgaagagtttgatcctggctcaggatgaacgctggcggtgtgtctaatacatgcaagtcgagcggcc--------------------cgcaagggcagcggcgaacgggtgaataatatgttggaacctaccccaaaacaggaaataccctttagaaataaaggataatgtcctataatcccgcaagggtaaag--------------tcgagacgttttgggaggggcctgcatcctatcagctagttggtgaggtaatggcttaccaaggcaatgacgggtagctggtctgagaggacggtcagccacaaggagactgagacacggctcctactcctacgggaggcagcagtaaggaatatttcacaatgggcgaaagcctgatgaagcgaca…
>CPR_Pe_Peregrinibacteria_GCA_001788715.1
ttattggagagtttgatcctggctcagggtgaatgttggcggtgcgtctaatacatgcaagtcgagcgaggc-------------------ttcgagccgagcggcagacggctgagtaacacgttggtagctacctcaaactcggggataactatgagaaatcatagctaataccggatggtcccgtaagggtaaag--------------tttttacggtttgagaggtgcctgcgtcctatcaggtagttggtaaggtaacggcttaccaagcctatgacgggtaactggtctgagaggatggccagtcagagggaaactgagacacggttcccactcctacgggaggcagcagtaaagaatcttccacaatggacgaaagtctgatggagcgaca…
>CPR_Pe_Peregrinibacteria_GCA_000993615.1
tctttggagagtttgatcctggctcagggttaacgctggcggtgtgtataatacatgcaagtcgagcgcccagcactt--------gataaggtgctgggagcggcgaacgggtgaggaacacgttggtagctaccccatactcagggataccccatcgaaaggtgggctaataccggatggccccgcaagggtaaag--------------cttttgcggtatgggaggcgcctgcggcctatcagcttgttggtgaggtaacggctcaccaaggctatgacgggtagctggtctgagaggacgaccagccacagtgagactgagacacggctcacactcctacgggaggcagcagtaaagaatcttccgcaatgggcgaaagcctgacggagcaaca…
>CPR_Pe_Peregrinibacteria_GCA_001788875.1
tatatggagagtttgatcatggctcaggattaacgctggcggcgtgtataatacatgcaagtcgtacggtagt----------------agcaatactacagtggcaaacgggtgaggaacgcgttggaacctgcctcgcactcagggatagctcgtcgaaagacgaattaataccggatggtcccgcaagggtaaag--------------cttttgcggtgcgagaggggcctgcgtagtatcagctagttggtaaggtaatggcttaccaaggctatgacgcttagctggtctgagaggacgaccagccacaatgggactgagacacggcccatactcctacgggaggcagcagtagagaatatttcgcaatgggggaaaccctgacgaagcaacg…
>CPR_Pe_Peregrinibacteria_GCA_001788965.1
ttttcgaagagtttgatcctggctcagagtgaacgctagcggcgcgcctaacacatgcaagtcgagtgggttt----------------------agacccacggcaaacggctgcgtaacacgttggaaccttccccggactcagggataaccccgcgaaagcggggctaataccggatggcctcgtaagagtaaag--------------atttatcggtccgggaggggcctgcggcctatcagctagttggcgaggtaacggctcaccaaggcaatgacgggtagctggtctgagaggacgaccagccagaatggaactgcgacacggtccatactcctacgggaggcagcagtgaggaatcttccgcaatggacgaaagtctgacggagcgacg…
>CPR_Pe_Peregrinibacteria_GCA_001788955.1
tttttgaagagcttgatcctggctcagagcgaacgctagcggtgcgcctaaggcatgcaagtcgagcgctgcgttgca---ctacatgcgtgcagcgcagagcggcaaacggctgcgtaacacgtgggaacctaccccgtactcagggataacccgaggaaactcgggctaataccggatagtctcgtaagagcaaag--------------cttttgcggtacgggaggggcctgcggcctatcagcttgttggtaaggtaacggcttaccaaggcaatgacgggtagctggtctgagaggacgaccagccagaatgggactgcgacacggcccatactcctacgggaggcagcagctaggaatcttccgcaatgggggcaaccctgacggagcgaca…
>CPR_Pe_Peregrinibacteria_GCA_001789155.1
ctatcgaagagtttgatcctggctcagagtgaacgctagcggtgcgcctaacacatgcaagtcgcgcggcccg--------------------caagggcagcggcgaacggctgcgtaacacgttggtacctaccccgcactcagggataacctgccgaaaggcgggctaataccggatagttccgtgagggtaaag--------------cttcggcggtgcgggaggggcctgcggcctatcagtttgttggcagggtaacggcctaccaagactatgacgggtagctggtctgagaggacgaccagccagaatgggactgcgacacggcccatactcctacgggaggcagcagtgaggaatcttccgcaatgggcgaaagcctgacggagcgaca…
>CPR_others_Gracilibacteria_GCA_004563595.2
gttaaaaagagtttgatcctagctcagggtgaacgctagcggtgcgcctaacacatgcaagtcgagcggtaatagagagaa-----cttttctctatgagagcggcgaacgggtgagtaacacgttggtatctgcccccaagtcagggatagccattggaaacgatgattaataccggatagtctcttcggagtaaaa--------------atttattgcttggggaggaacctgcgttctatcagcttgttggtgaggtaaaagctcaccaaggctatgacggatacctggtctgagaggatgatcaggcacaatggaactgagacacggtccatactcctacgggaggcagcagtgaggaatcttccacaatggacgaaagtctgatggagcgaca…
>CPR_others_Absconditabacteria_GCA_000503875.1
tttttgaagagtttgaccctggctcaggatgaacgctagcggaacgcctaacacatgcaagtcgaacgagagttattttgt-----caaaagataatgaaagtggcaaacgagcgagtaacacgtactaacctgcccagaagttgaggccaacta--cagagatgtagctaatcctcaatagtatctaaagattaaag--------------atttatcgcttttggaggggggtgcggcctatcaggtagttggtgaggtaatggctcaccaagcctatgacgggtagccggtctgagatgatgtccggccgcgatgggactgagatacggcccatactcctacgggaggcagcagtggggaatcttgcacaatggacgaaagtctgatgcagcgatt…
>CPR_others_Andersenbacteria_GCA_001817065.1
tatactaagagtttgatcctggctcagggtgaacgctggcagcgtggataaggcatgcaagtcgaatgg-cctgtctcgattttcacaagatggtagg-ccatggcaaacgggttagtaacacgtaggaacctacccgaaagcgggggataacccaccgaaaggtggaataataccccatagtctcgcacgagtaaag--------atcgcaactaatcgctttcggaagggcctgcggcctatcagcttgttggtggggtaaaagcctaccaaggctacgacgggtagggggtgtgagagcatgacccccaacattggaactgcgacactgtccaaacacctacgggtggctgcagtcgagaatcttcggcaatgcacgaaagtgcgaccgagcgacg…
>CPR_others_Doudnabacteria_GCA_001777585.1
ttcaatgagagtttgatcctggctcaggatgaacgctggcggcgtgccttatacatgcaagtcatacgggtgt----------------cgcaagacaccagtggcgaacggctgagtaacacgtgggaacgt-ccttcaagttcggaataactcaccgaaaggtgagctaataccggatgtgatcgcaagatcaaag------------ccgcaaggcgcttgaagcacggcccgcgcaccatcaggtagttggcgaggtaatagctcaccaagcctatgacggttaggggacccgagagggtgtacccccagacggggactgcgacacggccccgactcctacgggaggcagcagtagggaatattggacaatgggcgaaagcctgatccagcgacg…
>CPR_others_Doudnabacteria_GCA_001780115.1
aactataagagtttgatcctggctcaggatgaacgctggcggcgtgccttatacatgcaagtcgagggggtt-----------------------agacccccggcgaacgggtgagtaatacataggactttgcct--tggcggaggataaccagccgaaaggttggacaatactccatgtgatcgcaagatcaaagag--------cggggatcggcaccaaggaataggcctgtgtcctatcagctagttggtgaggtaacggcccaccaaggctatgacgggtagctggtctgagaggatgatcagccacaatgggactgcgacacggcccatactcctacgggaggcagcagtagggaattttggacaatgggggaaaccctgatccagcgacg…
>CPR_PB1_Jacksonbacteria_GCA_001873465.1
ttttttgagagtttgatcctagctcaggatgaacgctggcggcgtgtttaaggcatgcaagtcgaacgagtcgatctc--------aagggagatcggcgagtggcaaacgggtgagtataacataagaatttgcccttatcccagacataacttggcgaaagctaagctaatatctgatggcctcgca-aagtaaag--------tccgcagcggaatggataaggagaagcttatgtcccatcaggtagttggcggggtaatagcccaccaagccaatgacgggtagcaggtgtgagagcacgacctgcctcactgggactgagacactgcccagactcctatgggaggctgcagtcaagaatcttcctcaatggccgaaaggctgaaggagcgacg…
>CPR_PB1_Jacksonbacteria_GCA_001818155.1
tactttgagagtttgatcctagctcagggtgaacgctggcggcatgtcttaggcatgcaagtcgaacggtcgt-------------ccgcaaggcacggtagtggcaaacgggagcataacacactggaatctacccttaagtcgggtataacctgccgaaaggcggactaattcccgatggtctccga-gagtaaag--------------gtcgatcacttaaggaggagcctatgtcccatcagctagttggtagggtaatggcctaccaaggcaacgacgggtagcgggtgtgagagcatgacccgcctcactgggactgagacactgcccagactcctacgggaggctgcagtcaagaatattccgcaatggccgaaaggctgacggagcaatg…
>CPR_PB1_Jacksonbacteria_GCA_001818275.1
acaatggagagtttgatcctggctcaggatgaacgctagcggcaggcttaatacatgcaagtcgaggggtagcatgattg------tacaattgatgacgaccggcaaacgggtgcggaacacgtacaaaccttcctacaagtggggaatagcccagagaaatttggattaataccccgtaacatagcgctattatag--------------cttcggcgcttgttgatgggtgtgcggctgattagatagttggcggggtaacggcccaccaagtctacgatcagtagctgatgtgagagcatgatcagccacacgggcactgagacacgggcccgactcctacgggaggcagcagtaaggaatattggacaatggacgcaagtctgatccagccatg…
>CPR_PB1_Jacksonbacteria_GCA_001818275.1_2
ttttttgagagtttgatcctagctcaggatgaacgctggcggcatgtcttaggcatgcaagtcgaacggttc--------------ggcgcaagccggacagtggcagacgggagagtaacacattggaatctaccctcgagtcgggcataaccctgcgaaagcggggctaattcccgatggtcttggc-aagtaaag--------------tttcggcgctcgaggaggagcctatgtcccatcagcttgttggtagggtaatggcctaccaaggctacgacgggtagcgggtgtgagagcatgacccgcctcactgggactgagacactgcccagactcctacgggaggctgcagtcaagaatattccgcaatggccgaaaggctgacggagcaatg…
>CPR_PB1_Jacksonbacteria_GCA_001000505.1
actattgagagtttgatcctggctcaggatgaacgctggcggcaagttttaggcatgcaagtcaatcga--tc------------------gcaagattgggaggcaaacgggtgcgtaacacattggaatctccccttctcacgggcataatctgccgaaaggtggaataatacccgatatcttc-ca-gaagaaag--------------ctccggcggagaaggaagagcctatggcccatcagcttgttggtagggtaatggcctaccaaggctacgacgggtagcgggtgtgagagcacgacccgcctcactgggactgagacactgcccagactcctacgggaggctgcagtcaagaatcttccacaatgggcgaaagcctgatggagctatg…
>CPR_PB1_Kerfeldbacteria_GCA_001818285.1
tttcttgagagtttgatcctggctcaggatgaacgctggcggcgtgtcttaggcatgcaagtcaagggggtttcgcga--------gcaatcgtggaacaaccggcaaacgggagcgtaacacattggaacctgcccccatcacggccataacccggagaaatctggactaattgccgatggtctctca-gagtaaag--------------gttagccagatggggaggggcctatggtccatcagcttgttggtgaggtaatggctcaccaaggcgacgacggatagcgggtgtgagagcatgacccgcctcactgggactgagaaactgcccagactcctacgggaggctgcagtcaagaatcttccccaatggccgaaaggctgagggagcgacg…
>CPR_PB1_Kerfeldbacteria_GCA_001818785.1
tttattgagagtttgatcctggctcaggatgaacgccggcggcgtggataaggcatgcaagtcgaacgat----------------------------atagtggcaaacgggagaggaagacagtggaattttccccgaagatgaggataaccccgagaaattggggctaatactcaatagtcatgggcatgtaaag--------------atttttcgcttcgggagaagcctttggcctatcagcttgttggtgtggtaacggcacaccaaggcaacgacgggtagggggtgtgagagcatgacccccctcactgggactgagacactgcccagacacctacgggtggctgcagtcgagaatcttccccaatgggcgaaagcctgagggagcgacg…
>CPR_PB1_Kerfeldbacteria_GCA_001818775.1
tttaatgagagtttgatcctggctcagggtgaacgctggcggcgtgtttaaggcatgcaagtcgaacggacct----------------cgcaagaggtcagtggcaaacgggagaataacacattggaacctaccccgaagcgggaaataacacctcgaaagaggtgctaatatcccatataatggctttatgaaag--------------atttatcgctttgggaggggcctatgttccatcagctcgttggtgaggtaaaagctcaccaaggcaacgacggataccgggcgtgagagcgtgacccggctcactgggactgagacactgcccagacacctacgggtggctgcagtcgagaatcttccccaatggacgaaagtctgagggagcgacg…
>CPR_PB1_Kerfeldbacteria_GCA_001818315.1
cttaatgagagtttgatcctggctcagggtgaacgctggcggcgtgtttaaggcatgcaagtcgaacggttcgtaccg-----------aaggtacggacagtggcaaacgggtgagtaacacattggaacctacccttcacaggagaataaccccgcgaaagtggggctaatactccgtacgttctgg-gaagaaag---------------tttttcggtgaaggaggggcctatgtcccatcagcttgttggtaaggtaacggcttaccaaggctatgacgggtagcgggtgtgagagcacgacccgcctcactgggactgagatactgcccagacacctacgggtggctgcagtcgagaatcttccccaatggacgaaagtctgagggagcgacg…
>CPR_PB1_Komeilibacteria_GCA_001818445.1
ttaactaagagtttgatcctggctcagggtgaacgctggcggcatgtctaaggcatgcaagtcgaatgctt------------------agtttactaagcatggcaaacgggagagtaacacgttggaatctacctctgtctcagggataacccggagaaatctggagtaatacctgataggtatgggcatataaag--------------atccgtcggatggagaggagcctacggcacatcagcttgttggtaaggtaacggcttaccaaggctacgacgtgtagcgggtgtgagagcatggcccgtctcactggaactgagatactgtccagactcctacgggaggctgcagtcgagaatcttcctcaatggacgaaagtctgaaggagcaatg…
>CPR_PB1_Komeilibacteria_GCA_000999255.1
ataaatgagagtttgatcctggctcaggatgaacgctggcggcgtgtctaaggcatgcaagtcgaatgg--caactgt---ttttacgctacagttgcggcatggcagacgggtgagtaacacattggaacctacctctaactcgggcataactcggagaaatccgggataattcctgatagccatgggcatgtaaag--------------atttatcggttagagaggggcctatggcccatcagcttgttggtaaggtaaaagcttaccaaggcaatgacgggtagcgggtgtgagagcatgacccgcctcactgggactgaaatactgcccagactcctacgggaggctgcagtcaagaatcttccgcaatggccgaaaggctgacggagcgacg…
>CPR_PB1_Veblenbacteria_GCA_001822985.1
tctactgagagtttgatcctggctcaggatgaacgctggcggcgtgtcttaggcatgcaagtcgaacggatataaatttga-----caagagtttatattagtggcaaacgggtgcgtaacaccctggaacctaccccgaagttcggaataattcaccgaaaggtgaactaataccggatgtagtccgt-gaaaaaag------------ctttacggcgctttgggaggggcctaggttccatcagcttgttggtgaggtaacggctcaccaaggctacgacggatagggggcgtgagagcgcgacccccctcactgggactgcgacactgcccagactcctacgggaggctgcagtcaagaatcttccccaatggacgaaagtctgagggagcgacg…
>CPR_PB1_Falkowbacteria_GCA_016699775.1
atcacagagagtttgatcctggctcaggatgaacgcttgcgatgtgtctaaggcatgcaagtcgaatgctagt----------------agcaatactggcatggcaaacgggagagtaacacattggaacttacctcgaagtcgggcataacccggagaaatccggagtaattcccgatggccgtgggcacgtaaag--------------ttttttcgcttcgagagagacctatgttctatcagctagttggtaaggtaacggcttaccaaggctacgacggatagcgggtgtgagagcatggcccgcctcactgggactgagaaactgcccagactcctacgggaggctgcagtcaagaatcttcctcaatggccgaaaggctgaaggagcgaca…
>CPR_PB1_Falkowbacteria_GCA_001780195.1
ttttttgagagtttgatcctggctcaggatgaacgctggcggcgtgtctaaggcatgcaagtcgaacgccccg----------------cttcggcggggagtggcagacgggtgagtaacacattggaacctacctctaacacgggcataaccccgcgaaagcggggctaattcccgatgttct-gca-cagtaaag--------------ttcaggcggttagagaggggcctatggtctatcagcttgttggtggggtaaaagcctaccaaggctacgacggatagcgggcgtgagagcgcgacccgcctcacagggactgaaa-actgccctgactcctacgggaggctgcagtcgagaatcttcctcaatggacgaaagtctgaaggagcgacg…
>CPR_PB1_Falkowbacteria_GCA_001778095.1
ttttttgagagtttgatcctggctcaggatgaacgctggcggcgtgtctaaggcatgcaagtcgaacggcgtgcttcg---gttgacgtgcgaagcgcgcagtggcaaacgggtgagtaacacattgaaacctaccccaaagtgtggaataactccgcgaaagcggcgctaataccacgtacgatctcgggaggaaaggc--------ccgcaagggtcgctttgggaggggtctatggcttatcagctagttggtaaggtaatggcttaccaaggctatgacgagtagcgggcgtgagagcgcgacccgcctcagtgggactgagacactgcccacactcctacgggaggctgcagtcgagaatattccccaatggacgaaagtctgagggagcgacg…
>CPR_PB1_Falkowbacteria_GCA_001778235.1
ttttttgagagtttgatcctggctcaggatgaacgctggcggcgtgtctaaggcatgcaagtcgaacgaacctttaga--------ttgctttgaaggtgagtggcaaacgggagagtaacacattggaacctaccccaaagacaggaataacaccgagaaattggtgctaatacctgatgtgct-gcg-cagtaaaa--------------ctacggtgctttgggaggggcctatggtctatcagcttgttggtgaggtaatggctcaccaaggctacgacggatagcgggtgtgagagcatgacccgtctcactgggactgagacactgcccagactcttacgggaggctgcagtcaagaatattcctcaatgcacgaaagtgtgaaggagcgacg…
>CPR_PB1_Falkowbacteria_GCA_000996245.1
tttgtcaattcaatgattttaaaggtagatttgctatcacca-gtgtctaaggcatgcaagtcgaacgcctattcctt--------tcggatagaataggagtggcaaacgggtgagtaacacattggaacatacctctgactcgtgaacaactcggagaaatctgagctaatacacgatggtct-gca-cagtaaag--------------atttatcggtcagagagtggcctatggcctatcagctagttggtaaggtaaaagcttaccaaggctacgacgggtagcgggtgtgagagcacgacccgcctcactgggactgagacactgcccagactcctacgggaggctgcagtcgagaattttcctcaatgcacgaaagtgtgaaggagcgacg…
>CPR_PB1_Falkowbacteria_GCA_001778005.1
tttactgagagtttgatcctggctcaggatgaacgctggcggcgtgtctaaggcatgcaagtcgtacgtgttccgcag-----------aatgcggaatgcgtggcaaacgggagcgtaacacattggaacctacccttgagatgagtataaccccgcgaaagcggggataatcctcaatgaaagtgagcacttaaag---------ccgcaaggcggggctcaaggaggggcctatgtctcatcagcttgttggcagggtaacggcctaccaaggctatgacgagtaccgggtgtgagagcatgacccggctcactgggactgagacactgcccagactcctacgggaggctgcagtcaagaatattccccaatgcgcgcaagcgtgagggagcgacg…
>CPR_PB1_Falkowbacteria_GCA_001778085.1
tatattgagagtttgatcctggctcaggatgaacgctggcggcgtggataaggcatgcaagtcgagcggaccc------------------ttcggggtcagcggcaaacgggctagtaacgcgtgggaacgtacctttctctcgagaataagcgtctgaaaaggcgtctaatactcgatggcaatggggggataaag--------------atttatcggagaaagagcggcccgcgtcctatcagctagttggcgagataaaagctcaccaaggctatgacgggtagggggtgtgagagcacgacccccagcatcgggactgagacactgcccggactcctacgggaggctgcagtcgagaatcttggacaatgcgcgaaagcgtgatccagcgacg…
>CPR_PB1_Falkowbacteria_GCA_000994905.1
attacagagagtttgatcctggctcaggatgaacgctggcggcgtgtctaaggcatgcaagtcgaatgg-tc-acttcggt---------------gg-ccatggcaaacgggagagtaacgcattggaatctaccccgaagtcgagtataacccggagaaatctggaataatcctcgataatctcgca----taaag---------------tt-g-cgcttcgggaggaacctatgtcctatcagctagttggtgaggtaacggctcaccaaggctatgacaggtaccgggtgtgagagcatgacccggcccactgggactgagacactgcccagactcctacgggaggctgcagtcaagaatattcctcaatggccgaaaggctgaaggagcgacg…
>CPR_PB1_Falkowbacteria_GCA_000999715.1
aatttagagagtttgatcctggctcaggatgaacgctggcggcgtgtctaaggcatgcaagtcgaatgtctgt----------------agcaatacaggcatggcaaacgggagagtaacacattggaatctacctctaagacgaggataaccttgcgaaagcgagagtaatactcgatagtattaaa-aattaaag--------------ctccggcgcttagagaggagcctatggcctatcagctagttggcgagataatagctcaccaaggctacgacgggtatggggtgcgagagcatggacccactcactgggactgagacactgcccagactcctacgggaggctgcagtcaagaatcttccccaatgggcgaaagcctgagggagcgacg…
>CPR_PB1_Kuenenbacteria_GCA_001871365.1
ttaactaagagtttgatcctggctcaggatgaacgctggcggcgtgtcttaggcatgcaagtcgaatgtcaatttttt---------------aaattggcatggcgaacgggtgagtaacacattggaacctaccccaatcacgggcataacctatcgaaagattggataattcccgatggtctccca-gagtaaaggtata---tttattctgtaccggattgagaggggcctatgtctgattagcttgttggtggggtaatggcccaccaaggcgacaatcagtagcggggatggaagtctgatccgcctcactgggactgagatactgcccagactcctacgggaggctgcagtcgagaatcttcctcaatggccgcaaggctgaaggagcgacg…
>CPR_PB1_Kuenenbacteria_GCA_001783645.1
tttactaagagtttgatcctagctcaggatgaacgctggcggcgtgtctaaggcatgcaagtcgtacgatcgtgcctcgctagtcaccggaggcacgacacgtggcgaacgggtgagtaacacattggaacctacccccaagacgggcataactcctcgaaagaggagataattcccgatggtttccga-gaataaaa--------------ctccggtgcttggggaggggcctatgtctgattagctagttggtgaggtaacggcccaccaaggcgacgatcagtagcggggatggaagtctgacccgcctcactgggactgagacactgcccagactcctacgggaggctgcagtcgagaatcttcctcaatggccgaaaggctgaaggagcgacg…
>CPR_PB1_Kuenenbacteria_GCA_001873195.1
tttactaagagtttgatcctggctcaggatgaacgctggcggcgtgtctaaggcatgcaagtcgaggggctcaatttt----------------ttgagccccggcgaacgggtgagtaacacattggaacctacctctgtcacgggcataactccgagaaatcggaaataatacccgatagac-ttttagagtaaag--------------ctt--acggacagagaggggcctatgtctgattagcttgttggtgaggtaatggctcaccaaggcgatgatcagtagcggggatggaagtctgacccgcctcactgggactgagatactgcccagactcctacgggaggctgcagtcgagaatattcctcaatgcccgcaagggtgaaggagcgacg…
>CPR_PB1_Buchananbacteria_GCA_000992395.1
ttttttgagagtttgatcctggctcaggatgaacgctggcggcgtgtctaaggcatgcaagtcgaacgatctctttta--------gcaatattagagggagtggcaaacgggtgagtaacacattggaacctgcctcgaggttcggaacaacttggcgaaagccgagctaattccggatgtgatcgc--gaggaaag--------------gcgagtcgcctcgagagggacctatggcttatcagctagttggtagggtaacggcctaccaaggctatgacgagtagcgggtgtgagagcatgacccgcctcacggggactgagacactgccccgactcctacgggaggctgcagtcaagaatattccacaatgggcgaaagcctgatggagcgacg…
>CPR_PB1_Buchananbacteria_GCA_001817495.1
atttttgagagtttgatcctagctcaggatgaacgctggcggcgtgtttaaggcatgcaagtcgaacgaacctatgctcttctccggatgagcgtaggtgagtggcaaacgggagcgtaacgcattggaacctacccctaacacggtcataaccccgcgaaagcggagctaatagccgatgtgctta-a-acgtaaag--------gttgaagccagccggttagggaggggcctatgtcctatcagcttgttggtgaggtaatggctcaccaaggcaacgacgggtaccgggcgtgagagcgtggcccggctcactgggactgaaacactgcccagactcctacgggaggctgcagtcaagaatcttgcgcaatgggcgaaagcctgacgcagcgacg…
>CPR_PB1_Uhrbacteria_GCA_001791575.1
ttttttgagagtttgatcctggctcagggtgaacgctggcggcgtgtctaaggcatgcaagtcgaacgattc-gtttccg------caaggaag--ggatagtggcgaacgggtgagtaacaccttggaacctacctccgagtggggtataactccgcgaaagcggagctaatcctccatgcgctc-ca-gagcaaag--------gccccg-ctgatcgctcggagaggggcctaggtcccatcagctagttggtagggtaatggcctaccaaggcaatgacgggtagccggtgtgagagcacggtcggcctcactgggactgagatactgcccagacacctacgggtggctgcagtcgagaatcttccccaatggccgcaaggctgagggagcgacg…
>CPR_PB1_Uhrbacteria_GCA_001873525.1
acttatgagagtttgatcctggctcaggatgaacgctggcggcatgactaaggcatgcaagtcgaacgccccg----------------atttatcggggagtggcaaacgggtgcgtaacacattggaacctgccccctgctggggaacaactccgcgaaagcggggctaataccgcatagtttcgc--gaataaaggagtgaatcttgtagtctggcggaaggggaggggcctatggcctatcagcttgttggtgaggtaaaagcttaccaaggcaatgacgggtagcgggtgtgagagcacgacccgcctcactgggactgagacactgcccagactcctacgggaggctgcagtcatgaatattccacaatggccgaaaggctgatggagcaatg…
>CPR_PB1_Uhrbacteria_GCA_000405185.1
ctttttgagagtttgatcctagctcaggatgaacgctggcggcgtgtctaaggcatgcaagtcaaacgggctc------------------caagagtaccgtggcaaacgggtgcgtaacacattggaacctacctccgagacggtcataacccggcgaaagccgggctaatagccgatacattcccg-gacgaaag--------------gcaagacacttggagaggggcctatggtctatcagctagttggtggggtaatggctcaccaaggctacgacggatagcgggtgtgagagcacgacccgcctcaggggaactgagacactgtccccacttctacggaaggctgcagtcaagaatattcctcaatggacgaaagtctgaaggagcgacg…
>CPR_PB1_Uhrbacteria_GCA_001791115.1
tttactgagagtttgatcctggctcaggatgaacgctggcggcgtgtctaaggcatgcaagtcgaacgggtacgggga--------gcaatcctcgtgccagtggcaaacgggtgcgtaacacattggaacctgcctcgaagacgggcacaacccttcgaaagaggggctaattcccgatacggatgcgcattgaaag---------------tcagacgcttcgagaggggcctatgccctatcagctagttggtgaggtaacggctcaccaaggctacgacgggtagcaggcgtgagagcgcgacctgcctcagtgggactgagacactgcccacactcctacgggaggctgcagtcaagaatcttccccaatgggcgaaagcctgagggagcgacg…
>CPR_PB1_Uhrbacteria_GCA_001791415.1
--tattgagagtttgatcctagctcagggtgaacgctggcggcgtgcctaaggcatgcaagtcgaacgaatt-attttcag-----caa--aaa--gattagtggcaaacgggtgcgtaacacattggaacctgcccgtgagatgggtataaccccgcgaaagcggggctaatccccaatgga--tgcg-ggataaaggag-----gacgtaactgtccgctcacggaggggcctatggtctatcagctagttgg
>CPR_PB1_Uhrbacteria_GCA_001001705.1
ttctttgagagtttgatcctagctcagggtgaacgctggcggcgtgcctaaggcatgcaagtcgaacgagtgtgcccc--------gcaaggggcgcgcgagtggcagacgggagagtaacacattggaacctgccttgaagacgggcataattcgccgaaaggcgaactaattcccgatggacatgagcatgtaaag--------------aaaagacgcttcaagaggggcctatggcctatcagcttgttggtggggtaacggcctaccaaggctacgacgggtagcgggtgtgagagcacgacccgcctcagtggaactgagacactgtccacactcctacgggaggctgcagtcaggaatattgggcaatgggcgaaagcctgacccagcgacg…
>CPR_PB1_Uhrbacteria_GCA_001791275.1
tttactgagagtttgatcctggctcaggacgaacgttggcggcgtgtctaaggcatgcaagtcgtgcggatcgctggtcgt-----tacggtcggcggttagcggcaaacgggtgcgtaacacattggaatctgcctcgaagtcgggcacaaccccgcgaaagcggggctaattcccgatggagatgagtatctaaag--------------tcgagacgcttcgagaggagcctatggcctatcagcttgttggcggggtaatggcccaccaaggctatgacgggtatggggtgtgagagcacgaccccactcactgggactgagacactgcccagacacctacgggtggctgcagtcgagaatattccccaatggccgaaaggctgagggagcgacg…
>CPR_PB1_Uhrbacteria_GCA_001872545.1
taatctgagagtttgatcctggctcaggatgaacgctggcggcgtgtctaaggcatgcaagtcgaacgagtcggttctctt-----cggagagcttgattagtggcaaacgggtgcgtaacacattggaacctaccccaaagttcggcataacaactcgaaagggttgctaattccggatgtgtccgcg-gagtaaaa--------------cccaggcgctttgggaggggcctatggcctatcagcttgttggtaaggtaaaagcttaccaaggctacgacgagtagcgggtgtgagagcatgacccgcctcactgggactgagacactgcccagacacctacgggtggctgcagtcaagaatattccacaataggggaaaccctgatggagcgacg…
>CPR_PB1_Uhrbacteria_GCA_001791035.1
acttctgagagtttgatcctggctcaggatgaacgctggcggcgtgcctaaggcatgcaagtcgaacgattca----------------cttcggtgaagagtggcaaacgggagagtaacacattggaacttacccagaggtcgtgaataacttcgagaaatcgttgctaatacacgatggtcaagggcttgtaaag--------------ttcaggcgcctctggagaggcctatgtccgattagcttgttggtgaggtaacggcccaccaaggctccgatcggtagcgggtgtgagagcatgacccgtctcactgggactgagacactgcccagacacctacgggtggctgcagtcaggaatcttccacaatgcacgaaagtgtgatggagcgacg…
>CPR_PB1_Uhrbacteria_GCA_000997055.1
atatatgagagtttgatcctggctcaggtcgaacgctggcggtgtgtctaaggcatgcaagttgagcgaactttatttct------tcggaagttaagttagcggcaaacgggagagtaacgcattagaattcaccttgtactcgtgaatagcccagagaaatctggagtaatacacgatatgat-gggcattgaaag--------------ttccgacggtgcaagagaagcttatgttctatcagctagttggtgaggtaaaggctcaccaaggctacgacggataccgggcgtgagagcgtgacccggctcactgggactgagacacggcccagacacctacgggtggctgcagtcaagaatcttccgcaatgcacgaaagtgtgacggagcgaca…
>CPR_PB1_Uhrbacteria_GCA_001001645.1
tcttctgagagtttgatcctggctcaggatgaacgctggcggcgtgtctaaggcatgcaagtcgaacgagcttttattact-----cggttttaaaagaaagtggcaaacgggtgcgtaacaccttgaaacctacctcgaggtcgtgaacaactctgggaaactagagctaatacacgatggccaagggcttgtaaaa--------------attttttgcctcgagaggggtctaggccctatcagcttgttggtgaggtaatggctcaccaaggctatgacgggtagggggcgtgagagcgcgacccccctcactgggactgagacactgcccagacacctacgggtggctgcagtcaagaatattcctcaatgcacgaaagtgtgaaggagcgacg…
>CPR_PB1_Uhrbacteria_GCA_001004565.1
tcttctgagagtttgatcctggctcaggatgaacgctggcggcgtgtctaaggcatgcaagtcgaacggacgcatt----g-----atcaatggtgcgttagtggcagacgggagcgtaacacattggaacctacctcgaagtcgtggataactccgcgaaagcggagctaatacacgatatggtcccgggatgaaag--------------ttccgacgcttcgagaggggcctatggcctatcagcttgttggtgaggtaatggctcaccaaggctatgacgggtaggggacgtgagagcgtgatccccctcactgggactgagacactgcccagacacctacgggtggctgcagtcaagaatcttccacaatgggcgaaagcctgatggagcgacg…
>CPR_PB1_Uhrbacteria_GCA_001002565.1
tttattgagagtttgatcctggctcaggacgaacgctggcggcgtgtctaaggcatgcaagtcgaacggtctgttgttct------tcggagtaacagatagtggcaaacgggagcgtaacacattggaacctacctcgagactgtgaataattccgcgaaagcgggactaatacacaatatggatgggcattgaaag--------------ttccgacgtctcgagaggggcctatgtcctatcagctagttggtgtggtaaaagcgcaccaaggctatgacgggtatcgggcgtgagagcgtggcccgactcactgggactgagacactgcccagacacctacgggtggctgcagtcgagaatattccgcaatgggcgaaagcctgacggagcgacg…
>CPR_PB1_Magasanikbacteria_GCA_000998685.1
tttattgagagtttgatcctggctcaggatgaacgctggcggcgtgggtaaggcatgcaagtcgaacggactaatttg--------atcaatgattagttagtggcaaacgggtgagtaacacattggaacctaccttgaagacgaacacaaccccgagaaatcggggctaatattcgatggtcatgagcatgtaaag---------ttccaaaagaacgcttcaagaggggcctatggtctatcagctagttggtgaggtaaaagctcaccaaggctatgacggatagcgggcgtgagagcgcgacccgcctcactgggactgagacactgc------------------------------------------------------------------…
>CPR_PB1_Magasanikbacteria_GCA_001782975.1
ttaactgagagtttgatcctggctcaggatgaacgctggcggcgtggctaaggcatgcaagtcgagcggattttgttttgt-----tacaaaacacgatcagcggcagacgggtgcgtaacacattggaatcttccctcgagtcgtgcatagctttccgaaaggaaaggtaattcacgatggacatgtgcatgtaaag------------cagcaatgcgctcgaggaggagcctatggcctatcagctagttggtgaggtaaaagctcaccaaggctatgacgggtagggggcgtgagagcgtggcccccctcactgggactgagacactgcccagacacctacgggtggctgcagtcgcgaatattcggcaatgggcgaaagcctgaccgagcgacg…
>CPR_PB1_Magasanikbacteria_GCA_001783215.1
ttttttaagagtttgatcctagctcaggatgaacgctggcggcgtgtttaaggcatgcaagtcgtacgaaggtggctttagaattagcaaaaagtacttcagtggcaaacgggtgagtaacacactggaacctacctctaagacgaggatagctctccgaaaggagaattaatactcgatggaaatgcgcatttaaag--------------tcgagacgcttagagaggggcctatgtctgattagctagttggtagggtaatggcctaccaaggctacgatcagtagcaggcgtgagagcgtgacctgcctcactgggactgagacactgcccagactcctacgggaggctgcagtcaagaatcttccacaatgggcgaaagcctgatggagcgacg…
>CPR_PB1_Magasanikbacteria_GCA_001783135.1
ttttttgagagtttgatcctggctcaggatgaacgctggcggcgtgtctaaggcatgcaagttgaacgtagtgttgcc--------caagggcaatattcagtagcaaacgggtgagtaacacattggaacctaccttcaagacggggatagctcaccgaaaggtgaattaatacccgatagtaatgggcatttaaat--------------ctttttggcttgaagaggggcctatgtctgattagctagttggtggggtaatggcccaccaaggctatgatcagtagcaggcgtgagagcgtgacctgcctcactgggactgagacactgcccagacatctacggatggctgcagtcaagaatattccccaatggacgaaagtctgagggagcgacg…
>CPR_PB1_Magasanikbacteria_GCA_001784455.1
tttattaagagtttgatcctagctcaggatgaacgctggcggcgtgtttaaggcatgcaagtcgaacgaagtactctc--------gcaagagaattactagtggcaaacgggtgagtaacacattggaacctaccttcaagacggggatagctcgccgaaaggcgaattaatactcgatggtaatacgtatttaaag--------------atttatcgcttgaagaggggcctatgtctgattagctagttggcggagtaaaagcccaccaaggctatgatcagtagcaggcgtgagagcgtgacctgcctcactgggactgagacactgcccagacatctacggatggctgcagtcaagaatattcctcaatggacgaaagtctgaaggagcgacg…
>CPR_PB1_Magasanikbacteria_GCA_001784435.1
ttttttgagagtttgatcctggctcaggatgaacgctggcggcgtgtttaaggcatgcaagtcgagcgacgtgttccc--------gcaagggaattacgagcggcaaacgggtgagtaacacattggaacctaccttgaagacagggatagctcgccgaaaggcggattaatacctgatggcaatgcgcatttaaag--------------ccgaggcgcttcaagaggggcctatggcctatcagctagttggcggggtaaaagcccaccaaggcaacgacgggtagcaggcgtgagagcgcggtctgcctcactgggactgagatactgcccagacacctacgggtggctgcagtcaagaatattccacaatgggggaaaccctgatggagcgacg…
>CPR_PB1_Magasanikbacteria_GCA_001784475.1
tttattgagagtttgatcctggctcaggatgaacgctggcggcgtgtttaaggcatgcaagtcgagcgaagtgcctgttactatttgtaacaggattactagcggcaaacgggtgagtaacacattggaacctaccttgaagacaggcatagctcgccgaaaggcgaattaatacctgatagtaatgcgcatttaaag--------------tcgagacgcttcaagaggggcctatggcctatcagctagttggcggggtaaaagcccaccaaggctccgacgggtagcaggcgtgagagcgcggtctgcctcactgggactgagaaactgcccagacacctacgggtggctgcagtcaagaatcttccacaatggacgaaagtctgatggagcgacg…
>CPR_PB1_Magasanikbacteria_GCA_001783065.1
gtatttgagagtttgatcctggctcaggatgaacgctggcggcgtgtttaaggcatgcaagtcgtacgagcc--------------gacgcaagtcggttagtggcagacgggagagtaacaccttggaacccacctccgagacggggatagctcaccgaaaggtgaattaatacccgatggcaatgcgcatttaaag--------------cttcggcacttggagagggacctaggtcctatcagctagttggtgaggtaatggctcaccaaggctacgacgggtagggggcgtgagagcgtgacccccctcactgggactgagaaactgcccagacacctacgggtggctgcagtcaagaatcttccacaatggccgaaaggctgatggagcgacg…
>CPR_PB1_Magasanikbacteria_GCA_001782935.1
ttatttgagagtttgatcctggctcaggacgaatgttggcggcgtgtataaggcatgcaagtcgagggatcgatcgta--------gcaatacgatacggaccggcagacgggagagtaacacattggaacctacctctaagacggggatagccttccgaaaggaagattaatacccgatagtaacgcgcgtttaaag--------------atttttcgcttagagcagggcctatggtctatcagctagttggtgaggtaatggctcaccaaggcgacgacggataggggacgtgagagcgtgatccccctcactgggactgaga-actgcccagacacctacgggtggctgcagtcaggaatcttccgcaatggacgaaagtctgacggagcgacg…
>CPR_PB1_Magasanikbacteria_GCA_001004885.1
tttattgagagtttgatcctggctcaggacgaacgttggcggcgtgtttaaggcatgcaagtcgagggggcct-------------caa----g--gg-gaccggcagacgggagaggaacacattggaacctaccttcgagacggggatagccccgggaaaccgggattaatacccgatggtcatg-g-ggacaaag--------tccctaatt--tcgctcgaagaggggcctatgccctatcagctagttggtgaggtaatagctcaccaaggctacgacgggtaggggacgtgagagcgtgacccccctcactgggactgagaaactgcccagacacctacgggtggctgcagtcaagaatcttccgcaatggacgaaagtctgacggagcgacg…
>CPR_PB1_Magasanikbacteria_GCA_001783045.1
tttattgagagtttgatcctggctcaggacgaacgttggcggcgtgtctaaggcatgcaagtcgagcgtggttccgat--------ttcggtcggaatctagcggcaaacgggtgagtaacacactggaacctgcctccgagacgggcatagcccaccgaaaggtggattaatacccgatggtcatgggcatgtaaa---------------ttttttggctcggagaggggcctatgtctgattagcttgttggtagggtaatggcctaccaaggcaccgatcagtagcaggcgtgagagcgtgacctgcctcactgggactgagatactgcccagactcctacgggaggctgcagtcaagaatattccgcaatggccgaaaggctgacggagcgacg…
>CPR_PB1_Magasanikbacteria_GCA_001782905.1
ttcattgagagtttgatcctggctcaggatgaacgctggcggcgtgtttaaggcatgcaagtcgtgcgcccc--------------gacgcaagtcggggagcggcaaacgggtgagtaacacattggaacctgcctccgagacgggcatagcccaccgaaaggtggattaatacccgatagtcatgcgcatgtaaa---------------ccgaggggcttggagaggggcctatgtcctatcagctagttggcggggtaacggcccaccaaggcgacgacgggtagcaggcgtgagagcgtgacctgcctcactgggactgagacactgcccagacacctacgggtggctgcagtcaagaatattccacaatggacgaaagtctgatggagcgacg…
>CPR_PB1_Magasanikbacteria_GCA_001784365.1
tttattgagagtttgatcctggctcaggatgaacgttggcggcgtgtctaaggcatgcaagtcgtgcgatcggtccagtccatttaaggactggatacggagcggcaaacgggtgagtaacacattagaatctaccttcgagacggggatagctcatcgaaagatgaattaatacccgatagtcatgggcatgtaaac--------------ctacggggctcggagaggagcttatgtctgattagctagttggtggggtaatggcctaccaaggctctgatcagtagcaggcgtgagagcgtgacctgcctcactgggactgagacactgcccagactcctacgggaggctgcagtcaagaatattccgcaatggacgaaagtctgacggagcgacg…
>CPR_PB1_Magasanikbacteria_GCA_000999365.1
ttcattgagagtttgatcctggctcaggacgaacgttggcggcgtgtctaaggcatgcaagtcgagggatcggataggtgc-----tgcatctattacggaccggcaaacgggtgagtaacacattggaacctacctctgagtcaagcatagcccaccgaaaggtggattaatacttgatggttatgggcatataaag--------------atttatcgctcagagaggggcctatgtctgattagcttgttggtagggtaatggcctaccaaggctctgatcagtagcaggcgtgagagcgtgacctgcctcactgggactgaga-actgcccagactcctacgggaggctgcagtcaagaatattccgcaatggccgaaaggctgacggagcgacg…
>CPR_otherPB_Moranbacteria_GCA_016699975.1
tttattgagagtttgatcctggctcaggatgaacgctggcggcatggataaggcatgcaagtcgaatgtgttggttaccgg-----ccggaaaccaataacatggcaaacgggttagtaatgcgtaggaatgttccctcaagtcgcgaataatccgtcgaaaggcggaataatacgcgatgtgctctacggagtaaag--------------atatatcgcttgaggagcagcctgcgtcctatcagctagttggtggggtaaaagcctaccaaggctttgacgggtagggggtgtgagagcatggcccccaacattgggactgagacactgcccaaactcctacgggaggctgcagtcgagaatattcgtcaatgcccgaaagggtgaacgagcgatg…
>CPR_otherPB_Moranbacteria_GCA_016699875.1
tttattgagagtttgatcctggctcaggatgaacgctggcggcatggataaggcatgcaagtcgagtgggtt----------------------tagacccacggcaaacgggttagtaatacgtaggaatgttcccttaagtcgtgaataatttgtcgaaagacaagctaatacacgatgtgctctacggagtaaag--------------atttatcgcttgaggagcagcctgcgtcctatcagctagttggtggggtaaaagcctaccaaggctctgacgggtagggggtgtgagagcatggcccccaacattgggactgagacactgcccaaactcctacgggaggctgcagtcgagaatattcgtcaatgggcgaaagcctgaacgagcgatg…
>CPR_otherPB_Moranbacteria_GCA_016699425.1
taaattgagagtttgatcctggctcaggatgaacgctggcggcgtggataaggcatgcaagtcgaatgggtt----------------------tagacccatggcaaacgggttcagataacataggaatctaccctcgagtcgcgaataatccggagaaatccggaagaatacgcgataccctctacggaggaatg--------------gtttaccgctcggggaggagcctgtgtcctatcagcttgttggtgaggtaatagctcaccaaggctatgacgggtagggggtgtgagagcacggcccccaacattggaactgagacactgtccaaacacctacgggtggctgcagtcgagaatattccacaatggacgaaagtctgatggagcgacg…
>CPR_otherPB_Moranbacteria_GCA_016699385.1
tttattgagagtttgatcctagctcaggatgaacgctggcggcatggataaggcatgcaagtcgagtgggtt----------------------tagacccacggcaaacgggttagtaatacgtaggaatgttccctcaagtcgtgaataatttgtcgaaagacaagctaatacacgatgtgctctacggagtaaag--------------atttatcgcttgaggagcagcctgcgtcctatcagctagttggtggggtaaaagcctaccaaggctctgacgggtagggggtgtgagagcatggcccccaacattgggactgagacactgcccaaactcctacgggaggctgcagtcgagaatattcgtcaatgggcgaaagcctgaacgagcgatg…
>CPR_otherPB_Moranbacteria_GCA_001001525.1
ctttttgagagtttgatcctggctcaggatgaacgctggcggcgtggataaggcatgcaagtcgaggg--cc-atttt---------------g-ag--gcccggcaaacgggttagtaacgcataggaacgtaccctcgagtctcgaataatccctcgaaagggggaataatgcgagatagtctc-c--gagtaaag--------------atttatcgcttgaggagcggcctgtgtcctatcagcttgttggcggggtaaaggcccaccaaggctatgacgggtaggggatgtgagagcatgatccccaacattgggactgagacactgcccaaacacctacgggtggctgcagtcgagaatcttcggcaatgggcgaaagcctgaccgagcgacg…
>CPR_otherPB_Moranbacteria_GCA_001003855.1
tttattgagagtttgatcctggctcaggacgaacgctggcggcgtggataaggcatgcaagtcgagtgggtt----------------------tagacccacggcaaacgggttagtaatacataggaatcttccctgaagtcgcgaataatccggagaaatccggaataatacgcgatgtgttctacggaataaag--------------atttatcgcttcaggaggagcctatgtcctatcagcttgttggtgaggtaatggctcaccaaggctatgacgggtagggggcgtgagagcgtggcccccaacattgggactgagacactgcccaaacacctacgggtggctgcagtcgagaatattccacaatggacgaaagtctgatggagcgacg…
>CPR_otherPB_Moranbacteria_GCA_000989885.1
ctttttgagagtttgatcctggctcaggatgaacgctggcggcgtggataaggcatgcaagtcgagtgggtt----------------------tagacccacggcaaacgggttagtaacgcgtaggaacgtaccctcgagtcgtgaacaacccggagaaatccgggataatacacgatgtgctctatggagcaaag--------------atttatcgcttgaggagcggcctgcgtcctatcagcttgttggtgaggtaatggctcaccaaggctatgacgggtagggggcgtgagagcgtgacccccaacattggaactgagacactgtccaaactcctacgggaggctgcagtcgagaatattccacaatgggcgaaagcctgatggagcgacg…
>CPR_otherPB_Portnoybacteria_GCA_000992445.2
tttattgagagtttgatcctggctcaggacgaacgctggcggcgtggatgaggcatgcaagtcgagcgagcc-ttcctcatttctacaggaggagcggcgagcggcaaacgggttagtaataccctggtatctaccctaaagaccggaacaacccagagaaatttgggctaatgccggatggtat-a-a-ggttaaag--------gttgtaatcagccactttgggaagagcctaggtcctatcagcttgttggcgggataatagcccaccaaggctatgacgggtagggggtgtgagagcatggcccccaacattgggactgagatactgcccaaactcctacgggaggctgcagtcgagaatcttccacaatgggcgaaagcctgatggagcgacg…
>CPR_otherPB_Portnoybacteria_GCA_001872305.1
tctattaagagtttgatcctggctcaggatgaacgctggcggcgtggataaggcatgcaagtcgaacgagcttttgaccg------caaggttgaaagcgagtggcgaacgagttagtaatgcgtagatacatacaattaacttgggcataactagccgaaaggttagctaattctcgatggtctcataagagtaaaggaggt---atctcaattctctggttaatgaatggtctgcgtcctatcagcttgttggtgaggtaatggctcaccaaggcgatgacgggtagggggcgtgagagcgcgacccccaacgatggcactgcgatacgggccatactcctacgggaggctgcagtcgagaatctttcgcaatgggggaaaccctgacgaagcgacg…
>CPR_otherPB_Portnoybacteria_GCA_001872495.1
taatttgagagtttgatcctagctcaggatgaacgctggcggcgtggataaggcatgcaagtcgagtgggtt----------------------tagacccacggcaaacgagttagtaacgcgtaggaatctgccctgaagtccggaataactcggagaaatccgagataataccggatggttcccgagggataaag--------------gttaattgcttcgggaggagcctgcgtcctatcagcttgttggcagggtaatggcctaccaaggcaatgacgggtaggggaagtgagaacttgttccccaacgatgggactgagacacggtccatacacctacgggtggctgcagtcgagaatcttccacaatgggcgaaagcctgatggagcgacg…
>CPR_otherPB_Portnoybacteria_GCA_001819605.1
ttcattgagagtttgatcctggctcaggatgaacgctggcggcgtggataaggcatgcaagtcgaacgatccttcgctctt-----gatgagcgtaggatagtggcgaacgggttagtaatacgtaggtaattatctttaagttgggaataacttcgagaaatcgaggctaatacccgatagtcccgcaagggtaaag--------------ttttttcgcttaaagagatgcctgcgtcctatcagcttgttggtagggtaacggcctaccaaggctatgacgggtagggggcgtgagagcgtgacccccaacagaggtactgcgacacggacctcacacctacgggtggcagcagtcgagaatcttcggcaatgggcgaaagcctgaccgagcgacg…
>CPR_otherPB_Portnoybacteria_GCA_000997475.1
attattgagagtttgatcctggctcaggatgaacgctggcggcgtggataaggcatgcaagtcgaacgagcctactttcctttttatcgagttgaaggcgagtggcaaacgggttagtaacgcgtaggaacttaccttgaagtcttgaataattcatcgaaaggtgaactaatacaagatggaaatgaggggataaag--------------ggtacttgcttctagagaggcctgcgtcctatcagctagttggtgaggtaatggcccaccaaggctatgacgggtagggggactgagaggttggcccccaacatcgggactgagacactgcccggactcctacgggaggctgcagtcaagaacctttctcaatgggcgaaagcctgaagaagcgacg…
>CPR_otherPB_Portnoybacteria_GCA_001872385.1
tacaatgagagtttgattctagctcaggatgaacgctggcggcgtggataaggcatgcaagtcaaacgg-tctgcctcactttttgtagga--g--ggatagtggcaaacgggttagtaacgcgtaggaacttaccctgaagtcttggataactccgcgaaagcggagctaatacaagatggaaatg-a-ggataaag--------tgcgtaacgcgatgcttcaggagaggcctgcgtcctatcagctagttggtgaggtaacggcccaccaaggcgatgacgggtagggggactgagaggtcggcccccaacatcggaactgagacactgtccggactcctacgggaggctgcagtcaagaaccttcgacaatgggcgaaagcctgatcgagcgacg…
>CPR_otherPB_Portnoybacteria_GCA_001819495.1
tacaatgagagtttgattctagctcaggatgaacgctggcggcgtggatagggcatgcaagtcgaacgatcgtttgtg---agttagaagcacgagcggtagtggcaaacgggttagtaacgcgtaggaacttaccctgaagttttgaataatcccgagaaatcgggactaatacaagatagtaatgaggggataaag--------------accggttgcttcaggagaggcctgcgtcctatcagctagttggtgaggtaacggcccaccaaggcgatgacgggtagggggactgagaggtcggcccccaacatcggaactgagaaactgtccggactcctacgggaggctgcagtcgagaatcttcgacaatgcgcgaaagcgtgatcgagcgacg…
>CPR_otherPB_Azambacteria_GCA_001002715.1
ttttatgagagtttgatcctggctcaggatgaacgctggcggcgtggataaggcatgcaagtcgaacgaggttggcga--------tcaattgccggcctagtggcaaacgagttagtaacacgtgggtatctaccttcaacacgggtataacccgccgaaaggcggactaattcccgatggtctaaaaatggcgaga--------------attaggcggttgaagaggagcccgcggcctatcagctagttggtagggtaatggcctaccaaggcaacgacgggtagggggggtgagagcccgttccccaacgacggcactgagacacgggccgtactcctacgggaggcagcagtcgagaatattcgacaatgggcgaaagcctgatcgagcgacg…
>CPR_otherPB_Azambacteria_GCA_000993645.1
tttattaagagtttgatcctagctcaggatgaacgctggcggtgtggataaggcatgcaagtcgtgcggacctgtttttgttttcttagaaggtgcagagagcggcgaaatggttagtaacaccctggcacttacctcaaagacaggaataactccgcgaaagcggagctaatacctgatagtcccgcacgtgtaaaggc------------gcaagccactttgagaaaggcctaggtcctatcagcttgttggtgaggtaatggctcaccaaggctatgacgggtaggaggcgtgagagcgcgacctccaacaagggcactgcgacatgggccctactcctacgggaggcagcagtcgataatcttcgacaatgggcgaaagcctgatcgagcgaca…
>CPR_otherPB_Azambacteria_GCA_000992485.1
ttctagtagagtttgattctagctcaggatgaacgctggcggtgtggataaggcatgcaagtcgagcggtccagcccc--------aactggagttggatagcggcaaacgagttagtaacacattggtactttccccaaagacggagacaaccagccgaaaggttggctaataaccgatagtctgaatacagtaaag------------acgcaagtcgctttgggagaggcctatggcctatcagctagttggtagtgtaatggactaccaaggctatgacgggtagggggtgtgagagcatggcccccaacgagggaactgagacacggtccctactcctacgggaggctgcagtcgagaatattcgacaatgggcgaaagcctgatcgagcgaca…
>CPR_otherPB_Azambacteria_GCA_000995795.1
ttatttgagaatttgatcctggttcaggatgaacgctggcggtgtggataaggcatgcaagtcgagcggttcgatttcgtc-----agacgaaatcgaatagcggcgaacgagttagtaacacgtaggaacttaccccaaagacgggaataaccctccgaaaggaggactaatacccgatggcatgaagaaaataaag------------tcgcaagacgctttgggagaggcctgcgggctatcagctagttggtagggtaatggcctaccaaggcgatgacggctagggggcgcgagagcgtgttccccaacgaagggactgagacacggccctaactcctacgggaggcagcagtcgagaatatttcgcaatgggcgaaagcctgacgaagcgaca…
>CPR_otherPB_Yanofskybacteria_GCA_001824325.1
----ttgagagtttgatcctggctcaggatgaacgctggcggcgtggataaggcatgcaagtcgagcgg----acttc------------------ggttagcggcgaacggggtagtacaaagtaggaacgtgcctgtaactctgggataactccgagaaatcggagctaataccagatagtcccgca-gggtaaag---------------ttgg-cggttacagatcggcctactccccatcagctagttgg
>CPR_otherPB_Yanofskybacteria_GCA_001795715.1
tcttaagagagtttgatcctagctcaggatgaatgctggcggcgtggataaggcatgcaagtcaaacggatt-atttcccg-----caa-------gatcagtggcgaacgagttagtattaccttggtacgtaccctcgagtcgggcataattcagcgaaagttggactaattcccgatagtctcgca-gagtaaag---------tcgca---ag-cgcttgaggagcggcctcggtcctatcagctagttggcggggtaacggcccaccaaggctatgacgggtagggggtgtgagagcacggcccccaacgacggaactgagatacggtccgtacacctacgggtggcagcagtcgagaatattcgacaatgggcgaaagcctgatcgagcgacg…
>CPR_otherPB_Yanofskybacteria_GCA_001794605.1
--tattgagagtttgattctagctcaggatgaacgctggcggcgtggataaggcatgcaagtcgaacggact-attttggagttgccaaggaagaaagttagtggcgaacgagttagtaacaccttggtatgtaccctgaagccgggcataatctgccgaaaggcagactaattcccgatggtctcgca-gagtaaag---------ccgca---ag-cacttctggagcagcctaggtcctatcagctagttgg
>CPR_otherPB_Yanofskybacteria_GCA_001795795.1
ctttaagagagtttgatcctggctcaggatgaacgctggcggcgtggataaggcatgcaagtcaaacggactc-------------gcaatacggagtacagtggcgaacgagttagtaacatcttggtacgtaccctcgagatgcgaataactagtcgaaagattagctaatacgcaatggtctcgca-gagtaaagga------------gcaatccgctcggggagcggcctagatcctatcagcttgttggcggggtaaaagcccaccaaggctatgacgggtagggggcgtgagagcgcgttcctcaacgacggaactgagatacggtccgtacacctacgggtggcagcagtcgagaatattcgacaatgggggaaaccctgatcgagcgacg…
>CPR_otherPB_Yanofskybacteria_GCA_001794715.1
tattaagagagtttgattctggctcaggatgaatgctggcggcgtggataaggcatgcaagtcgaacgagctttctcc--------caaggagaaggtgtagtggcgaacgagttagtaacaccttggtacgtaccctttagtcgggcacaaccagccgaaaggttggctaattcccgatagtccctcacgggtaaagtc------------gcaagacgctaaaggagcggcctaggtcctatcagcttgttggcggggtaaaagcccaccaaggctatgacgggtaggaggcgtgagagcgcgaccttcaacggcgatactgagaaacggatcgcacacctacgggtggcagcagtcgagaatattcgacaatgggcgaaagcctgatcgagcgacg…
>CPR_otherPB_Yanofskybacteria_GCA_001794285.1
atttaagagagtttgatcctggctcaggatgaacgctggcggcgtggataaggcatgcaagtcaaacgggcc-agcatata-----caa----g--ggtcagtggcgaacgagttagtaataccttggaacgtactccgaagacggggataactagtcgaaagattagctaatacccgatggtctcgta-gagtaaag---------tcgca---ag-cgcttcggaagcggcctaggtcctatcagcttgttggtgaggtaatggctcaccaaggctatgacgggtagggggtgtgagagcacggcccccaacgatgacactgcgatacgggtcatacacctacgggtggctgcagtcgagaatattcgacaatgggcgaaagcctgatcgagcgacg…
>CPR_PB2_Terrybacteria_GCA_001824745.1
ttattagagagtttgatcctggctcaggatgaacgctggcggcgtggataaggcatgcaagtcaagggggccc------------------gcaagggcaaccggcgaacgagctagtattaccttggtacctcccccgaagtcgggtatagctcatcgaaagatggggtaatacccgatagtctcgtgagagtaaag------------gagcaatccgcttcgggaagggcctcggtccgatcagctagttggtggggtaacggcctaccaaggcaacgaccggtagggggcgtgagggcgcgacccccagcgacggaactgcgacacggtccgtacacctacgggtggcagcagtcgagaatattcgacaatgggcgaaagcctgatcgagcaacg…
>CPR_PB2_Terrybacteria_GCA_000993875.1
ttatttgtgagtttgatcctggctcaggatgaacgctggcggcgtggagaaggcatgcaagtcgaatgggtt----------------------tagacccatggcgaacgaggtagtaatacatagatacgtaccttagagtctgagataatccatcgaaaggtgggataatatcagatggtcccgcaagggtaaag--------------atttattgctctaagatcggtctatgcgctatcagctagttggtgaggtaatggctcaccaaggcaatgacggctagggggcgtgagagcgtgatccccaccgatggcactgcgacacgggccatacacctacgggtggcagcagtcgagagtcttccacaatgggcgaaagcctgatggagcgacg…
>CPR_PB2_Spechtbacteria_GCA_001820035.1
ttttttgagagtttgatcctggctcaggatgaacgctggcggcgtggataaggcatgcaagtcgcgcgagcttacctcactttcaacgggaggtgcggctagcggcaaacgggttagtaacgcgtaggtagttgccccatactcagggatagcccggagaaatccggattaatacctgatagtcccgaaagggtaaag--------------atttatcggtatgggaggcgcctgcgtcctatcagcttgttggtgaggtaacggcccaccaaggctatgacgggtagggggtgtgagagcacgacccccaacactgggactgagatacggcccagacacctacgggtggctgcagtcgagaatcttccacaatgggcgaaagcctgatggagcgacg…
>CPR_PB2_Spechtbacteria_GCA_001820015.1
ttttttaagagtttgatcctagctcaggatgaacgctggcgatgtggataaggcatgcaagtcgagcgaaccc------------------ttcggggttagcggcagacgggttagtaacgcgtagggagctacccctcactcgggaataagccgccgaaaggcggtctaatgcccgatagcaccgaaaggttaaag--------------atttatcggtgagggaggcacctgcgtcctatcagcttgttggtgaggtaatggctcaccaaggctatgacgggtaggggatgtgagagcatgatccccaacaagggcactgagacactggccctactcctacgggaggctgcagtcgagaatcttccgcaatgggcgaaagcctgacggagcgaca…
>CPR_PB2_Spechtbacteria_GCA_001820055.1
ttttttaagagtttgatcctggctcaggatgaacgctggcggtgtggataaggcatgcaagtcgagcgattatattta----------------tataatagcggcagacgggttagtaacacgtaggtagctacctctcactcaggaataagccactgaaaagtggtctaatgcccgatagtcccgcaagggtaaag--------------atttatcggtgagagaggcgcctgcggcctatcagctagtaggtagggtaatggcctacctaggctatgacgggtagggggtgtgagagcatgatccccaacaagggcactgagatactggccctactcctacgggaggctgcagtcgagaatcttccgcaatgcacgaaagtgtgacggagcgaca…
>CPR_PB2_Wildermuthbacteria_GCA_001823105.1
tattctgaggattcgatcctggtccaggatgaacgctggcggcgtggataaggcatgcaagtcatacggtactgaggtcg------caagaccgaagtgcagtggcgaattggttagtaacacgtagaaatctgcctcgaggacaggcatagtcccgcgaaagcgggaataattcctgatagtaatgag-atttaaag------------ccgcaaggcacctcgagatgagtctgcgtcctatcagctagttggtagggtaacggcctaccaaggcgatgacgggtaggggggatgagagtctgttccccaacaagggcactgagacatgggccctactcctacgggaggcagcagtcgagaatattcggcaatgggggaaaccctgaccgagcgacg…
>CPR_PB2_Wildermuthbacteria_GCA_001824885.1
ttcttagagagtttgatcctagctcaggatgaacgctggcggcgtggataaggcatgcaagtcgtgcggttctgtttccg------caagggaacagaatagcggcgaacgagttagtaacacgtaggtacttcccccggagacgggcataattccgcgaaagcggaactaattcccgatagtcctgtaagagtaaag------------gagcaatccgctccgggaaaggcctgcggcctatcagctagttggtgaggtaacggctcaccaaggctatgacgggtagggggcgtgagagcgcgttccccaacgatgggactgagatacggcccatactcctacgggaggcagcagtcgagaatattggtcaatgggcgaaagcctgaaccagcgacg…
>CPR_PB2_Nealsonbacteria_GCA_000398025.1
ttttttgagagtttgatcctggctcaggatgaacgctggcggcgtggatcaggcatgcaagtcgagcgagccgcctcc--------caaggaggcgagcgagcggcaaacgggttagtaacacgtgggtacataccgctaagacagggacaactagccgaaaggttagctaatccctgatagtccctcacgggtaaag--------------cttaggcgcttagcgattggcccgcggcctatcagctagttggtggggtaacggcccaccaaggcgatgacgggtaggcggtgtgagagcacgatcgccaacactggcactgcgatacgggccagactcctacgggaggctgcagtcgagaatattggtcaatgggggaaaccctgaaccagcgacg…
>CPR_PB2_Nealsonbacteria_GCA_001302985.1
ttttttgagagtttgatcctggctcaggatgaacgctggcggcgtggataaggcatgcaagtcggacgtcccgctttt--a-----gcggga--------agtggcgaacgagttaataacacgtaggaacgaaccccaaagacgaggacaattcatcgaaaggtggactaatcctcgatagttcccctgggataaaa--------------ggaaaccgctctgggatcggcctgcggcctatcagctagttggtaaggtaatggcttaccaaggctatgacgggtaggcggagtgagagcttgaccgccaacgatggcactgcgacacgggccatactcctacgggaggcagcagtcgagaatattggtcaatgggggaaaccctgaaccagcgacg…
>CPR_PB2_Staskawiczbacteria_GCA_001873425.1
ttttttgagagtttgatcctagctcaggatgaacgctggcgacgtggataaggcatgcaagtcgtacgggcccatcttcg------caagaaggg-gggtagtggcgaacgggttagtaacacgtagaaacatacccctaacatatgcataactaattgaaagattagctaattcatgatagtcccgca-gggtaaag---------gtataatttgccggttagggagtggtctgcggcctatcagctagttggtaaggtaatggcttaccaaggcaatgacgggtagggggtgtgagagcacgatccccaacagaggcactgagatacgggcctcacttctacgggaggcagcagtcgagaatcttcggcaatgggcgaaagcctgaccgagcgacg…
>CPR_PB2_Staskawiczbacteria_GCA_001872425.1
--ttttgagagtttgatcctagctcaggatgaacgttggcggcgtggataaggcatgcaagtcgcgcga-tctgcctttt-tgtatcgaaggagaaggatagcggcgaacgagttagtaacacgtgggaactaacctataagactcgcataattccgcgaaagcggaactaatacgagatggtctcgca-gagtaaag---------gagaa---atccgcttatagataggcccgcggcctatcagcttgttgg
>CPR_PB2_Staskawiczbacteria_GCA_001872225.1
ttttatgagagtttgatcctggctcaggatgaacattggcgatgtggataaggcatgcaagtcgaacgaa-------------------ag--a-ag-ttagtggcagacgagttagtaacacataggtacttgcctcaaagacgggtatagcccggagaaatccggggtaatccccgatagtcccgta-gggtaaag---------gagta---atccgctttgagagaggcctgcggcctatcagcttgttggtgaggtaatagctcaccaaggctatgacgggtaggggaagtgagagcttgttccccaacgatgggactgagacacggcccatactcctacgggaggctgcagtcgagaatcttccgcaatgggcgaaagcctgacggagcgaca…
>CPR_PB2_Staskawiczbacteria_GCA_001820485.1
taatttgagagtttgattctagctcagggtgaacgctggaaatgtggatacggcatgcaagtcaagggggccc------------------gcaagggcaaccggcgaacggcttagtaacacgtaggtacataccttaaagtggggcatagctcgtcgaaagacggggtaatttcccatagtcccgca-gggtaaag------------tcgcaagacgctttaagaatggcctgcggtctatcagctagttggtggggtaaaagcctaccaaggctatgacggatagggggcgtgagagcgcgacccccaagaatggcactgcgatacgggccatactcctacgggaggctgcagtcgagaatcttccgcaatgggcgaaagcctgacggagcgaca…
>CPR_PB2_Staskawiczbacteria_GCA_000992015.1
ttttagttcccgttgatcct-gcgggagattactgctattgggattccaaaggcatgcaagtctaagg--------------------------caagagcttggcgaaaggctcagtaacacgtcgaaatctgtccttagatcagggataatcttgggaaactgaggctaatacctgataaaaaattgtttaaaaag--------------ctttggcgtctaagggtgagtcggcggcggattaggctgttggcggggtaaaggcccaccaaacctaaaatccgtaaggggaatgagagttctagccctgagaaggacactgagatactggtcctagccctaaggggtgcagcagctaggaaacctttacaatgcacgaaagtgtgataaggggaac…
>CPR_PB2_Staskawiczbacteria_GCA_001822095.1
--atttgagagtttgatcctagctcagggtgaacgctggtaacgtggatacggcatgcaagtcgagcggacc--------------caa-------ggtcagcggcgaacggcatagtaacacgtgggtacataccccaaagtggaggacagctcgtcgaaagacggggtaatactccatagcctcgca-gagtaaag---------tctca-c--gacgctttgggaatggcctgcggcctatcaggtagttgg
>CPR_PB2_Staskawiczbacteria_GCA_001822065.1
--atttgagagtttgatcctagctcagggtgaacgctggtaacgtggatacggcatgcaagtcacgggggcc---------------------gaaggcaaccggcgaacggcttagtaacacgtaggtacataccccaaagtggagcatagctcgttgaaaaacggggtaattctccataatatcgca-gattaaag---------cagta---atgcgctttgggaatggcctgcggcctatcagattgttgg
>CPR_PB3_Jorgensenbacteria_GCA_001872485.1
atttctgaggatttgatcctggtccaggatgaacgctggcggtgtggattaggcatgcaagtcgatcggacctatttt--------cgggg--g-aggagagaggcgaacgagttagtaacaccttggaacctgccctgaagatggacatagctcgccgaaaggcggggtaatttccaatagcctcgcatggttaaag---------atgca---aatcgctttaggatgggcctaggtctgatcagctagttggtaaggtaatggcttaccaaggctatgaccagtaggggggctgagaggctgttccccaacgacgagactgagatacggctcgtacacctacgggtggcagcagtcgagaatattccgcaatgggcgaaagcctgacggagcgaca…
>CPR_PB3_Jorgensenbacteria_GCA_001002925.1
ttttaagaggatttgatcctggtccaggatgaacgctggcggtgtggattaggcatgcaagtcgcacggtccc------------------gcaagggatagtggcgaacgagttaggaacaccttggaaccttcccccgagatagggatagctcgtcgaaagacggggtaatacctgatggtccctgaagggtaaag---------------caaggggcttggggatgggcctaggcctgatcagctagttggtagggtaacggcctaccaaggctatgaccagtaggggagctgagaggctgttccccaacgggggcactgagacacgggccccactcctacgggaggcagcagtcgagaatattccacaatgggcgaaagcctgatggagcgaca…
>CPR_PB3_Jorgensenbacteria_GCA_001779575.1
ttttttgagagtttgatcctagctcaggatgaacgctggcgacgtggataaggcatgcaagtcgagcggttttgtttc--------caaga--gaaagacagcggcgaatgggttagtaataccctggtacataccccgaagtgggaaatagccagtcgaaagattgggtaatatcccatagtttcgca-cagtaaag---------acgca---agtcgcttcgggaatggcttaggtccgatcagctagttggtagggtaaaagcctaccaaggctatgaccggtaggggggccgagaggctgttccccaacaacgcaactgagacatggtgcgtacgcctacgggcggcagcagtcgagaatattccacaatgggcgaaagcctgatggagcgacg…
>CPR_PB3_Jorgensenbacteria_GCA_001779505.1
ttaattgaggatttgatcctggtccaggatgaacgctggcggcgtggataaggcatgcaagtcgtacgatctttcatt--------gaaggatgaaaggtagtggcgaacgggttagtaacgccttggtacgtacctccgagatgagcatagccatccgaaagggtgggtaatactcaatggcccccgaggggtaaag------------aagcaattcgcttggagagcggcctaggtccgatcagcttgttggtgaggtaatggctcaccaaggcgacgaccggtagggggagtgagagctcgatccccaacattggcactgacacactggccaaacacctacgggtggctgcagtcgagaatattgggcaatgcgcgaaagcgtgacccagcgacg…
>CPR_PB3_Jorgensenbacteria_GCA_001004105.1
ttttttgaggatttgatcctggtccaggacgaacgctggcggcgtggataaggcatgcaagttgaacggccgagcaccag------caatggtgctcggtagtggcgaacgagttagtaacaccctggtacgtaccccaaagacgggcataactccgcgaaagcggagctaattcccgatagcgaagcaattctaaag------------tcgtaagacgctttgggatcggcctaggtccgatcagctagaaggtgtggtaacggcgcaccttggctatgaccggtagggagggtgagagcccgtttcccaacgacgcaactgagacacggtgcgtactcctacgggaggcagcagtcgagaatattcgacaatgggcgaaagcctgatcgagcgacg…
>CPR_PB3_Jorgensenbacteria_GCA_001001265.1
ttattagaggatttgatcctggtccaggatgaacgctggcggcgtggataaggcatgcaagtcgagcgg-tctgcttcactttttgtaggaagga-agatagcggcgaacgagttagtaacaccttggtacctaccccagagccgggcatagccagccgaaaggttgggtaattcccgatggtctcgca-gagtaaag---------acgca---agtcactctgggatggacctaggtctgatcagcttgttggtagggtaacggcctaccaaggctatgaccagtagggggggtgagagcccgatccccaacgaggaaactgagacacggttcctactcctacgggaggcagcagtcaagaacattcgacaatgggcgaaagcctgatcgagcgacg…
>CPR_PB3_Jorgensenbacteria_GCA_001779535.1
ttttttgaggatttgatcctggtccaggatgaacgttggcggcgtggataaggcatgcaagtcgaacgggcc-gtgcg--------taggggaagtggctagtggcaaacgagctagtaacaccttggtacctacctccgagatgggaataatcttgcgaaagcaggactaatacccaatggcctcgca-gagtaaag--------gttccaa-gaaccgctcggtgatgggcctaggtccgatcagctagttggtagggtaacggcctaccaaggctacgaccggtaggggaggtgagagcctgttccccagcgaggaaactgagacacggttcctactcctacgggaggcagcagtcgagaatattccacaatgggcgaaagcctgatggagcgacg…
>CPR_PB3_Wolfebacteria_GCA_001793865.1
taatttgagagtttgatcctagctcaggatgaacgctggcggcgtggataaggcatgcaagtcacgggggccg--------------------caaggcaaccggcgaacgagtcagtaacaccttggtacatacctcgaagtagggcatagcccgccgaaaggcggggtaattcgctataatcccgcaaggggaaag--------accggcggaatgcgctttgagattggcctaggtccgatcagcttgttggtgaggtaatggctcaccaaggctatgaccggtaggggggctgagaggctgatccccgacgacgagactgagacacggctcgtacacctacgggtggcagcagtcgagaatattccacaatgggcgaaagcctgatggagcgacg…
>CPR_PB3_Wolfebacteria_GCA_001793825.1
ttatttgagagtttgatcctagctcaggatgaacgctggcggcgtggataaggcatgcaagtcgaacggattactttt--------taagaaaagtaattagtggcaaacgagttagtaataccttggtacttacccttaagttaggcataattcgctgaaaggcgaactaatacctaatagttcccagggggtaaag------------aagcaattcgcttaaggagaggcctaggcccgatcagctagttggtgaggtaatggctcaccaaggctatgaccggtagggggggtgagagcctgttccccaacgacgcaactgagacacggtgcgtacacctacgggtggcagcagtcgagaatattccacaatgggcgaaagcctgatggagcgacg…
>CPR_PB3_Wolfebacteria_GCA_001793895.1
tataatgagggtttgatcctggcccaggatgaacgctggcggcgtggataaggcatgcaagtcgaacgaaccc------------------ttcggggttagtggcgaacgagttagtaacgccttggtacttaccgtatagtcaagaataaccagccgaaaggttggctaatacttgatagtctcgaaagagtaaag------------gagcaatccgctatacgataggcctaggtcctatcagctagttggtaaggtaactgcttaccaaggctacgacgggtagggggagtgagagcttgacccccaacgacggcactgagacacgggccgtacacctacgggtggcagcagtcgagaatattccacaatgggcgaaagcctgatggagcgacg…
>CPR_PB3_Colwellbacteria_GCA_001817715.1
tattttgaggatttgatcctggtccaggatgaacgctggcggcgtggataaggcatgcaagtcgaacgaaactatttttga-----ggattgaatagtttagtggcaaacgagttagtaataccttggaacttacctggaagtagggcatagctagtcgaaagattagataattccctatatggatgcggggagaaag------------acgcaagtcgcttctagataggccttggcccgatcagctagttggtgaggtaatggctcaccaaggctatgaccggtaggggaggtgagagcctgttccccaacgacggaactgagacacggtccgtacacctacgggtggcagcagtcgagaatatttgacaatgggcgaaagcctgatcaagcgacg…
>CPR_PB3_Colwellbacteria_GCA_001872405.1
tattttgaggatttgatcctggtccaggatgaacgctggcggcgtggataaggcatgcaagtcgaacgccgagcacataac-----caatatgtgcttggagtggcgaattggttagtaacacgtagaaatcttctcccgccacggccataactcggagaaatccgagctaatagccgatggtttctatagaataaag--------------gtcggccgggcgggaatgagtctgcggcctatcagctagttggtgaggtaatggcccaccaaggcaatgacgggtagggggaatgagagttcgatccccaacaaagatactgagacatggatcttactcctacgggaggcagcagtcgagaatattcggcaatgggggaaaccctgaccgagcgacg…
>CPR_PB3_Colwellbacteria_GCA_001817655.1
tttcaggaggatttgatcctggtccaggatgaacgctggcggcgtggattaggcatgcaagtcgagcggtccgattttt--------------gtcggacagcggcaaacgagctagtaacaccttggtacctaccccatacacggaaataatccgccgaaaggcggactaatatccgatggttgtccgggactaaag--------------gttagccggtatgggaggggcctaggcccgatcagcttgttggtagggtaacggcctaccaaggctacgaccggtaggggaggtgagagcctgacccccagcgacggaactgagacacggtccgtacacctacgggtggccgcagtcgagaatattccacaatgggcgaaagcctgatggagcgacg…
>CPR_PB3_Harrisonbacteria_GCA_001002005.1
cttattgaggatttgatcctggtccaggatgaacgctggcggcgtggataaggcatgcaagtcgaacggccttgtgtt---cttatcaagg--gcgaggcagtggcgaacgagtcagtaacgccttagtacataccctgaagtttggcatagctcgtcgaaagacgaggtaattccaaataatctc-cgggagtaaag---------atgca---aatcgcttcaggagtggcttaggtctgatcagctagttggtgaggtaacggctcaccaaggctatgaccggtagggggggtgagagcctgttccccgacgatgcaactgagacacggtgcatactcctacgggaggcagcagtcgagaatattcgacaatgggcgaaagcctgatcgagcgacg…
>CPR_PB3_Harrisonbacteria_GCA_001817995.1
atttttgaggatttgatcctggtccaggatgaacgctggcggcgtggataaggcatgcaagtcatacggacagagtttaa------tcaaggactctgttagtggcgaacgagttagtaacgccttggtacgtaccccgaagacggaaataactcgccgaaaggcgggctaatatccgatagcatcgtggaaataaaggcggt---cacgtcgcaagaggctttgggagcgacctaggtccgatcagctagttggtagggtaatggcctaccaaggctatgaccggtaggggagctgagaggctgttccccaacgacggaactgagatacggtccgtactcctacgggaggctgcagtcgagaatattcgacaatgggcgaaagcctgatcgagcgacg…
>CPR_PB3_Harrisonbacteria_GCA_001817915.1
atttaagaggatttgatcctggtccaggatgaacgctggcggcgtggataaggcatgcaagtcgaacgtgtcagtgct---agtaacaacggcattggcaagtggcgaacgagttagtaataccctagtacctacctttgagtcagagatagtccggggaaacccggggtaatatctgatagtctcgca-gagtaaaggc------------gcgagccgctcaaagatgggcttaggtccgatcagctagttggtagggtaattgcctaccaaggctatgaccggtaggggagctgagaggctgttccccaacgacgttactgaga-acggaacgtactcctacgggaggcagcagtcgagaatattcgacaatgggcgaaagcctgatcgagcgacg…
>CPR_PB3_Liptonbacteria_GCA_001821315.1
cttacagaggatttgatcctggtccaggatgaacgctggcggcgtggataaggcatgcaagtcgaacggaacaaacaagaa-----cgacgaatttgtttagtggcaaacgagtcagtaacgccttggaacctgccccgaagacggaaataattcgccgaaaggcgaactaatgtccgatagtctcgcaagagtaacggaacc-------aagggaaccgcttcgggaggggcctaggtccgatcagctagttggtagggtaacggcctaccaaggctatgaccggtagggggcccgagagggtgttccccgacgatgcaactgagacacggtgcatactcctacgggaggcagcagtcgagaatattcgacaatgggcgaaagcctgatcgagcgacg…
>CPR_PB3_Liptonbacteria_GCA_001818575.1
ttttaagaggatttgatcctggtccaggatgaacgctggcggcgtggataaggcatgcaagtcgagcgga-ctatctttgatttgacaagg--gaagtttagcggcgaacgagttagtaacaccctggtacgtacctcgaagtcgggaatagtccgccgaaaggcggggtaatgcccgatagtcccgca-gggtaaag------------cagc-atgcgcttcgagatcggcctaggcccgatcagctagttggtgaggtaatggctcaccaaggctatgaccggtagggggggtgagagcccggtccccaacgacgagactgagacacggctcgtactcctacgggaggcagcagtcgagaatattcgacaatgggcgaaagcctgatcgagcgacg…
>CPR_PB3_Liptonbacteria_GCA_001005035.1
ttttccgaggatttgatcctggtccaggatgaacgctggcggcgtggataaggcatgcaagtcgagcggaccttactt---gtttgggatttgtttggttagcggcgaacgagttagtaacaccttggtacgtaccctgaagtcgggtatagcccaccgaaaggtggggtaatccccgatggtctcgcaagagtaaag-----------------aggggcttcaggatcgacctaggtccgatcagctagttggtagggtaacggcctaccaaggctatgaccggtaggggaggtgagagcctgacccccaacgacgagactgagacacggctcgtactcctacgggaggcagcagtcgagaatat--------------------------------…
>CPR_otherPB_Sungbacteria_GCA_001822385.1
tccaatgaggatttgatcctggtccaggacgaacgctggcggcgtggataaggcatgcaagtcgaacggatctatttcattcttcgcagggaagagggttagtggcgaacgagttagtaacaccttggaacgtacccccgagatgggaataactggccgaaaggtcagctaatacccaatggtctcgtg-gagtaaag--------tgcgtaactagtcgcttggggagcggcctaggtcctatcagctagttggcggggtaacggcccaccaaggcgatgacgggtagggggcgtgagagcgcgacccccaacgatggaactgcga-acggtccatacacctacgggtggccgcagtcgagaatattcgacaatgggcgaaagcctgatcgagcgacg…
>CPR_otherPB_Sungbacteria_GCA_001820675.1
tttattgaggatttgatcctggtccaggatgaacgctggcggcgtggataaggcatgcaagtcgaacgggtctattttgtctgtttcaaaaaag-agg-gagtggcgaacgagttagtattaccttggaatctacccccaagttgggaataactccgcgaaagcggagctaatacccaatggccccgcacgagtaaag--------ctcgcaa--agccgctcggggaggagcctcggtcctatcagctagttggtgaggtaatggcccaccaaggcgatgacgggtagggagggtgagagcccgattcccaacgacgagactgagacacggctcgtacacctacgggtggccgcagtcaagaacattcgacaatgggcgaaagcctgatcgagcgacg…
>CPR_otherPB_Sungbacteria_GCA_001822345.1
attattgaggatttgatcctggtccaggatgaacgctggcggcgtggataaggcatgcaagtcaaacggaacaatttg--------ttaaagaattgtttagtggcgaacgagtcagtaacactttagtacctaccctagagacgggaataactccgcgaaagcggagctaatacccgatagtcccacagcagtaaag--------------attaatcgctctgggaggggcttaagtcccatcagcttgttggtagggtaatggcctaccaaggctatgacgggtagggggcgtgagagcgtgaccctcgacgacgagactgaga-acggctcgtacacctacgggtggcagcagtcgagaatattcgacaatgggcgaaagcctgatcgagcgacg…
>CPR_otherPB_Ryanbacteria_GCA_001819935.1
ttcaatgagagtttgatcctggctcaggacgaacgctggcggcgtggataaggcatgcaagtcgaacgctcccattttcg------gaaagtcgagggagagtggcaaacggggtagtaacacgtaggtacgtacccttaagtcgggtataactccgggaaaccggagctaattcccgatattgtggta-cacgaaag------------aagcaattcgcttaaggagcggcctgcgggctatcagcttgttggtgaggtaatggctcaccaaggcagtgacggctaggggacgtgagagcgtgacccccaccattgggactgagacacggcccaaacacctacgggtggctgcagtcgagaatcttcgacaatgggcgaaagcctgatcgagcgacg…
>CPR_otherPB_Ryanbacteria_GCA_001819745.1
ttttataagagtttgatcctggctcaggacgaacgctggcggcgtggataaggcatgcaagtcgaacggtcccgcttt--------tatggttgcgggatagtggcgaacggggtagtaacacgtgggtacttcccctgaagacgggaataattcatcgaaaggtggactaatacccgatggtcccgaaagggtaaag------------gagtaatccgcttcaggaaaggcctgcgggctatcagctagttggtagggtaaaagcctaccaaggctatgacggctagggggcgtgagagcgtgatccccaccaatggtactgcgacacggaccatacacctacgggtggctgcagtcgagaatcttccacaatggacgaaagtctgatggagcgacg…
>CPR_otherPB_Giovannonibacteria_GCA_000998435.1
tttaaagagagtttgatcctggctcaggatgaacgctggcggcgtggataaggcatgcaagtcaaacggaatatcttt---gttgacaaggtagatgttcagtggcagacggggtagtaacacgtaggaacttaccttagagacgggcataactagccgaaaggttagctaattcccgatagtctcgta-gagtaaa---------cactcag--attggctctaagaaaggcctgcgggctatcagcttgttggtagggtaatggcctaccaaggctatgacggctaggggaagtgagagcttgatccccaccaatggaactgcgacacggtccatacacctacgggtggctgcagtcaagaacattcgacaatgggcgaaagcctgatcgagcgacg…
>CPR_otherPB_Giovannonibacteria_GCA_001778985.1
cattaaaagggtttgatcctggcccaggatgaacgctggcggcgtggataatgcatgcaagtcgaacgaaatatattaat---------ttaatatgtttagtggcagacggggtagtaacacgtaggaacttaccccagagacggatataatccgccgaaaggcggactaattcccgatagtctccgaggagtaaaa--------------actattggctctgggagaggcctgcgggctatcagcttgttggcgaggtaatggctcaccaaggctacgacggctagggggcgtgagagcgcgacccccaccaatggaactgcgacacggtccatacacctacgggtggcagcagtagagaatattggacaatgggcgaaagcctgatccagcgacg…
>CPR_otherPB_Giovannonibacteria_GCA_001778785.1
ttaaatgagagtttgatcctagctcaggatgaacgctggcggcgtggataaggcatgcaagtcgaacgggtctatcttatccttcgcaagaaagaagg-cagtggcgaacgagttagtattaccttggtacatacctccgagatgggcatagctacccgaaagggtagataaatcccaatggtctcgcacgagcaaag--------atcgtaac-aatcgctcggtgagtggcctaggtcctatcagctagttggtgaggtaatggctcaccaaggctatgacgggtagggggtgtgagagcacgatcctcaacgacgagactgaga-acggctcgtactcctacgggaggcagcagtcgagaatattcgacaatgggcgaaagcctgatcgagcgacg…
>CPR_otherPB_Niyogibacteria_GCA_001819395.1
tttttagagagtttgatcctggctcaggatgaacgctggcggcgtggataaggcatgcaagtcgaacgaatcaaattttaa-----caagagatttggttagtggcagacggggtagtaacacgtaagtacttaccttgaagtcgggtacaactccgcgaaagcggagctaattcccgatagttccgtaagggtaaag------------gagcaatccgcttcaagaaaggcttgcgagctatcagcttgttggcggggtaaaagcccaccaaggctatgacggctagggggagtgagagctcgccccccaccaatggcactgcgatacgggccatacacctacgggtggcagcagccgagaatattccacaatgggcgaaagcctgatggagcgacg…
>CPR_otherPB_Niyogibacteria_GCA_001821615.1
attattgagagtttgatcctggctcaggatgaacgctggcggcgtggataaggcatgcaagtcgcgcggacc-gatttgag-----caaaa-----ggttagcggcaaacggggtagtaataggcaggtagattcctctaagacgggtataattcgccgaaaggcggactaattcccgatagtcccgca-gggtaaag---------gagca---atccgcttggagattcgcctgctcgctatcagctagttggcagggtaacggcctaccaaggcgatgacggctagggggagtgagagcttgttccccaccagggacactgcgacacgggtcccacacctacgggtggcagcagccgagaatattggacaatgggcgaaagcctgatccagcgacg…
>CPR_otherPB_Tagabacteria_GCA_000997345.1
ttcattgagagtttgatcctggctcaggatgaacgctggcggcgtggataaggcatgcaagtcgtacgccccgctttcaat-----aaaggttggcggggagtggcaaacggggtagtaacacgtaggtaccaacctccaagatgagaataatcccgcgaaagcgggactaatactcaatggttccgtaagggtaaag--------------gttaatcgcttggagacgggcctgcgggctatcagcttgttggcagggtaacggcctaccaaggcaacgacggctaggggagatgagagtctgttccccaccactggaactgcgacacggtccagacacctacgggtggctgcagtcgagaatcttcgacaatgcgcgaaagcgtgatcgagcgacg…
>CPR_PB4_Vogelbacteria_GCA_001823025.1
taatatgagagtttgatcttagctcaggatgaacgctggcggcgtggataaggcatgcaagtcgaatgatgcatctcactg-----tgagtgaggtgcgtcatggcgaacgaggtagtaacatgtaggtacgcacccggaagtcggggataacccgccgaaaggcggagtaatactcgatggtctcgcgagagtaaag--------------atttatcgcttccggagcggcctgcagcctatcagctagttggtaaggtaatggcttaccaaggcaatgacgggtagggggggtgagagcctggcccccaccgatgggactgagacacggcccatacacctacgggtggctgcagtcgagaatcttccacaatggacgaaagtctgatggagcgacg…
>CPR_PB4_Vogelbacteria_GCA_001824825.1
ttctttgagagtttgatcttggctcaggatgaacgctggcgacgtggataaggcatgcaagtcgagggccgcc------------------ttcgggcggaccggcaaacgaggtagtaacacgtaggaacgcacccagaagtcatgaatagccggccgaaaggtcgggtaatacatgatggtcccttaggggtaaag--------------atttatcgcttctggagcggcctgcgggatatcagctagttggtagggtaatggcctaccaaggctatgacgtctaggggaggtgagagcctgacccccaccgatggtactgagacacggaccatacacctacgggtggccgcagtcgagaatcttccacaatgggcgaaagcctgatggagcgacg…
>CPR_PB4_Vogelbacteria_GCA_001823055.1
ttttttgagagtttgatcttagctcaggatgaatgctggcgacgtggataaggcatgcaagtcgagtgggtt----------------------tagacccacggcgaacgaggtagtaacacgtgggaatctcccttcgagtttggcataacccgccgaaaggcggaataattccaaatagtcccttcggggtaaag--------------gcgagccgcttgaagaagagcctgcggaatatcagctagttggtaaggtaatggcttaccaaggcaatgacgtttaggggaggtgagagcctgacccccaccgatggtactgagacacggaccatacacctacgggtggctgcagtcgagaatcttccgcaatgggcgaaagcctgacggagcgacg…
>CPR_PB4_Nomurabacteria_GCA_016699365.1
tttaattagagtttgatcctagctcaggatgaacgctggcggcgtggataaggcatgcaagtcgaacgaactagtccc--------agggttcactagttagtggcgaacgaggtagtaacacgtgggtacgtcccccaaagtcgtgaacaacacaccgaaaggtgtgctaatacacgatggtccctccggggtaaag--------------ttttaacgctttgggaacggcctgcgggatatcagctagttggtagtgtaatggactaccaaggctatgacgtctaggggagctgagaggctgacccccaccgatgggactgagacacggcccatactcctacgggaggctgcagtcgagaatcttccacaatggacgaaagtctgatggagcgacg…
>CPR_PB4_Nomurabacteria_GCA_000998425.1
ttttaagagagtttgatcctagctcaggatgaacgctggcggcgtggataaggcatgcaagtagaacgccccg--------------------caaggggagttgcgaacgaggtagtaatacataggtacaaacccccgagtcaggaataagcgaccgaaaggtagtctaatacttgatagtcccgcaagggtaaag--------------atttatcgcttggggattggcctgtgcagtatcagctagttggtagggtaatggcctaccaaggcaatgacgcttaggagagctgagaggctgacctccaccgatggtact------------------------------------------------caatggacgcaagtctgacggagcgacg…
>CPR_PB4_Nomurabacteria_GCA_001785735.1
ttttttaagagtttgatcctagctcaggatgaacgctggcggcgtggataaggcatgcaagtcgaacggtccg----------------atttatcgggcagtggcgaacgaggtagtaatacgcaggaacgaacctccaagtcaggaataactcatcgaaagatgagctaatacttgatagaccctccggggtaaag--------------atttatcgcttggagatcggcctgtgggctatcagcttgttggtaaggtaaaagcttaccaaggcgatgacggctaggggaggtgagagcctgacccccaccgatggaactgagacacggtccatacacctacgggtggccgcagtcgagaatcttccgcaatggacgaaagtctgacggagcgacg…
>CPR_PB4_Nomurabacteria_GCA_001785725.1
tttcagtagagtttgatcctagctcaggatgaacgctggcggcgtggataaggcatgcaagtcgaacgccc--------------------cgcaaggggagtggcgaacggggtagtaacaggtaggaatgttcccagaagtcgtgaataatccatcgaaaggtggactaatacacgatggtctcttcggagtaaag--------------ttttaacgcttctggatcagcctgcctcgtatcagcttgttggcggtgtaaaagaccaccaaggctatgacgcgtaggggcgctgagaggcggacccccaccaaaggcactgagacactggccttacacctacgggtggctgcagtcaagaaccttccgcaatgcacgaaagtgtgacggagcgacg…
>CPR_PB4_Nomurabacteria_GCA_001786825.1
tttactgagagtttgatcctagctcaggatgaacgctggcggtgtggataaggcatgcaagtcatacggaacattcttcag-----caaaaggaatgtttagtggcaaacgaggcagtaacacgtaggtacttcccccaaagtcagaaacaactagtcgaaagattagctaatatctgatatgtctttg-gatgaaag------------aagcaattcgctttgggaaaggcctgcgggctatcagctagttggtggggtaacggcctaccaaggctatgacggctaggaggcgtgagagcgcgacctccgtcgatgggactgagacacggcccatacacctacgggtggcagcagccgagaatattcgacaatgggcgaaagcctgatcgagcgaca…
>CPR_PB4_Nomurabacteria_GCA_000505065.1
ttttaatagagtttgatcctagctcaggatgaacgctggcggcgtggataaggcatgcaagtcgaacggactttttat-------------tttaaagttagtggcgaacgaggtagtaatacataggaacttccccctaagtcgcgaacaacacatcgaaaggtgtgctaatacgcgatagtctctccggagtaaag---------------tttttcgcttagggaaaggcctgtgaagtatcagctagttggtagtgtaatggactaccaaggctatgacgcttaggggagctgagaggctgacccccaccgatgggactgagacacggcccatacacctacgggtggctgcagtcgagaatcttccgcaatggacgaaagtctgacggagcgacg…
>CPR_PB4_Nomurabacteria_GCA_001785575.1
ttcaagtagagtttgatcctagctcaggatgaacgctggcggcgtggataaggcatgcaagtcgaacggatagtaccg--------tcggatttgctattagtggcaaacgaggtagtaatacataggaatttccccctaagtcgtgaacaactcaccgaaaggtgtgctaatacacgatggtctctctggagtaaag--------------atttatcgcttagggaaaagcctgtgggatatcagcttgttggtagtgtaatggactaccaaggctatgacgtctaggggagctgagaggctgacccccaccgatgggactgagacacggcccatacacctacgggtggctgcagtcaagaaccttccacaatggacgaaagtctgatggagcgacg…
>CPR_PB4_Nomurabacteria_GCA_001785415.1
ttttagtagagtttgatcctagctcaggatgaacgctggcggcgtggataaggcatgcaagtcgaacggattttctatttc-----caacgtagaagattagtggcaaacgaggtagtaacacgtgggaactcaccccaaagtcgggcataattcgccgaaaggcggactaattcccgatggtct-gcaggagtaaag--------------atttttcgctttgggagaggcctgcggagtatcagctagttggtagggtaacggcctaccaaggctatgacgcttaggggaggtgagagcctgacccccaccgatggaactgcgacacggtccatacacctacgggtggcagcagccgagaatattcgacaatgggcgaaagcctgatcgagtgacg…
>CPR_PB4_Nomurabacteria_GCA_000380845.1
tttagttagagtttgatcctagctcaggatgaacgctggcggcgtggataaggcatgcaagtcgaacggtccctcccc--------aactggagaggggtagtggcgaacgaggtagtaatacataggaacttcccccaaagtcgtgaataattcgtcgaaagacggactaatacacgatggccccctaagactaaaggaaat---atctcaatttttcgctttgggaaaggcctgtgcgatatcagctagttggcagtgtaatggactaccaaggctatgacgtctaggggaggtgagagcctgacccccaccgatggtactgagacacggaccatacacctacgggtggctgcagtcgagaatcttccgcaatgggcaaaagcctgacggagcgacg…
>CPR_PB4_Nomurabacteria_GCA_001786195.1
tataattagagtttgatcctagctcaggatgaacgctggcggcgtggataaggcatgcaagtcgaacgaataagtcct--------tagggttacttattagtggcgaacgaggtagtaatacataggtacttcccctttagtcgcgaataattcgccgaaaggcgaactaatacgcgatggtctcgcaagagtaaag--------------aa-tttcgctaaaggaaaggcctgtgcggtatcagctagttggtagagtaacggcctaccaaggcgatgacgcctaggggcgctgagaggcggacccccaccgatggaactgagatacggtccatacacctacgggtggctgcagtcgagaatcttccacaatggacgaaagtctgatggagcgacg…
>CPR_PB4_Yonathbacteria_GCA_001823595.1
atacttaagagtttgatcctagctcaggatgaacgctggcggcgtggataaggcatgcaagtcgagtgggtt----------------------tagacccacggcgaacgaggtagtaacacgtaggaacgtacccaaaagtcgggcataaccagtcgaaagattggataattcccgatatctcttc-ggaggaaag--------------atttatcgcttttggatcggcctgcggaatatcagctagttggtagtgtaatggactaccaaggctatgacgtttaggggaggtgagagcctgacccccaccgatggtactgcgacacggaccatacacctacgggtggctgcagtcgagaatcttccacaatggacgaaagtctgatggagcgacg…
>CPR_PB4_Lloydbacteria_GCA_001819135.1
ttctgtaagagtttgatcctagctcaggatgaacgctggcggcgtggataaggcatgcaagtcgagggggcgcatcacttt-----aaaagtgatgcgtcaccggcagacgaggtagtaacacgtaggaacgaaccatgaagtcagggacaacccgtcgaaagacgggctaatacttgatagtctcgcgagagtaaag--------------atttatcgcttcatgatcggcctgcgacgtatcagctagttggtaaggtaattgcttaccaaggctatgacgcgtaggggaggtgagagcctggcccccaccgatgggactgcgacacggcccatacacctacgggtggctgcagtcgagaatcttccacaatggacgaaagtctgatggagcgacg…
>CPR_PB4_Campbellbacteria_GCA_016699465.1
tatatgtagagtttgatcctagctcaggatgaacgctggcggcgtggataaggcatgcaagtcaagggggccc------------------gcaagggcaaccggcaaacggggtagtaacaggtgggaacgtacctagaagtcaggaataacctgtcgaaagacaggctaatacctgatagtctccaaggagtaaag--------------ctccggcgcttctagaacggcccgcccgctatcagctagttggtaaggtaatggcttaccaaggcgtagacggctaggggaggtgagagcctgacccccaccactgggactgcgacactgcccagacacctacgggtggctgcagtcgagaatcttccgcaatgcacgaaagtgtgacggagcgacg…
>CPR_PB4_Campbellbacteria_GCA_001774495.1
ttattttagagtttgatcctagctcaggatgaacgctggctgtgtggataaggcatgcaagtcgagtgggtt----------------------tagacccacggcgaacgaggtagtaacacgtaggaatctcccccaaagtcaagcataacccatcgaaaggtgggataattcttgatagtcccgcaagggtaaag--------------atttatcgctttgggaagagcctgcgaagtatcagcttgttggtagggtaatggcctaccaaggcaatgacgcttaggggaggtgagagcctggcccccaccgatggcactgagacacgggccatactcctacgggaggccgcagtcgagaatcttccgcaatggacgaaagtctgacggagcgaca…
>CPR_PB4_Kaiserbacteria_GCA_017134395.1
ttaaattagagtttgatcctagctcagggtgaacgctggcggcatggataaggcatgcaagtcgaatgtatt----------------------tatttacatggcaaacggggtagtaacacgtaggaacgtacccagaagtcaggaataacccggagaaatccggaataatacctgatagtcccgcaagggtaaag--------------atttatcgcttctggagcggcctgcgtagtatcagcttgttggtaaggtaatggcttaccaaggctaagacgcttaggggaggtgagagcctgacccccaccattggaacttagacacggtccaaactcctacgggaggctgcagtcgagaatcttccgcaatgtacgaaagtatgacggagcgatg…
>CPR_PB4_Kaiserbacteria_GCA_001781805.1
ttaaattagagtttgatcctagctcaggatgaatgctggcggcgtggatgaggcatgcaagtcgaatgggtt----------------------taggcccatggcagacgaggtaggaacacgtaggtacgtaccccaaagtcagggataacccggagaaatccgggataatacttgatagtctcttcggagtaaag--------------atttatcgctttgggaacggcctgcgggctatcagcttgttggtaaggtaacggcttaccaaggctacgacggctaggggaggtgagagcctgacccccaccgatggaactgcgacacggtccatactcctacgggaggctgcagtcgagaatcttccgcaatggacgaaagtctgacggagcgacg…
>CPR_PB4_Kaiserbacteria_GCA_001783565.1
tttaattagagtttgatcctagctcaggatgaatgctggcggcgtggatgaggcatgcaagtcgaatgagtt--------------taa--------gctcatggcagacgaggtaggaacacgtaggtacgtaccccaaagtcagggataatccgtcgaaaggcggaacaatacttgatggtcccgcatgggtaaag--------------atttatcgctttgggaacggcctgcgggctatcagcttgttggtaaggtaacggcttaccaaggctacgacggctaggggaggtgagagcctgacccccaccgatggaactgcgacacggtccatactcctacgggaggctgcagtcgagaatcttccgcaatggacgaaagtctgacggagcgacg…
>CPR_PB4_Kaiserbacteria_GCA_001781625.1
cttagtgagagtttgatcctagctcagggtgaacgctggcggcgtggataaggcatgcaagtcaagggggc--------------------cgcaaggccaccggcagacgaggtagtaacacgtaggtacatacccgggagactggtacagctcgtcgaaagacggggtaatcccagatagtctcgcgagagtaaag------------gagcaatccgctcccggagtggcctgcgtcatatcagctagttggtagggtaacggcctaccaaggcttcgacgtgtaggggggctgagaggccgatccccaccgatgggactgagacacggcccatacctctacggagggcagcagccgagaatattccgcaatggacgaaagtctgacggagcgacg…
>CPR_PB4_Kaiserbacteria_GCA_001872505.1
cttaatgagagtttgatcctagctcagggtgaatgctggcggcgtggataagtcatgcaagtcgaacgccc--------------------cgcaaggggagtggcaaacgaggtagtaacacgtaggtacatcccccgaagtcgggcatagctatccgaaaggatgggtaattcccgatagtccatga-gaatgaaa--------------gtttttcgctccgggagcggcctgcgtagtatcagctagttggtagggtaacggcctaccaaggctacgacgcttaggggggctgagaggccgatccccaccgatggaactgcgacacggtccatactcctacgggaggctgcagacgagaatattccgcaatggacgaaagtctgacggagcgacg…
>CPR_PB4_Adlerbacteria_GCA_001773575.1
aatattcagagtttgatcctagctcaggatgaacgctggcgacgtggattaggcatgcaagtcaagggggccg--------------------caaggcaaccggcagacgaggtagtataacgcaggtacgcaccgaaaagtcgggcatagctagccgaaaggttaggtaattcccgatggtgaggcaactctaaag------------gagtaatccgctttttgagcggcctgcgcagcatcagttagttggtagggtaacggcctaccaagactatgacgcttagaagagctgagaggctgaccttcaccgatagcactgagacacgggctatacatctacggatggctgcagtcgagaatcttccacaatggacgaaagtctgatggagcgacg…
>CPR_PB4_Zambryskibacteria_GCA_001824215.1
taattttagagtttgatcctagctcaggatgaacgctggcggcgtggataaggcatgcaagtctaaaggattttcg----------gcaagccgaaggtccttggcaaacgaggtagtaacacgtaggtacgtaccctttagttgagtataactagccgaaaggttagataattctcaatggtctctaaggagtaaag--------------atttatcgctaaaggaacggcctgcggcctatcagctagttggtgaggtaatggctcaccaaggctatgacgggtaggggagctgagaggctgacccccaccgatggaactgagaaacggtccatacacctacgggtggccgcagtcgagaatcttccgcaatgggcgaaagcctgacggagcgacg…
>CPR_PB4_Zambryskibacteria_GCA_001825395.1
tattttaagagtttgatcctagctcaggatgaacgctggcggtgtggataaggcatgcaagtcaaacgg-tc--------------caa-------gg-cagtggcgaacgaggtagtaacacgtgggcacatcccttttagtcaggaataactagtcgaaagattgggtaatacttgatagtctc-c--gagtaaag--------gctgtaac-agtcgctaaaagaatggcctgcggagtatcagctagttggtagggtaatggcctaccaaggcaatgacgcttagggggagtgagagcttggcccccaccgatggtactgagatacggaccatacacctacgggtggccgcagtcgagaatcttccacaatggacgaaagtctgatggagcgaca…
>CPR_PB4_Taylorbacteria_GCA_000996205.1
tatatttagagtttgatcctagctcaggatgaacgctggcggcgtgggtaaggcatgcaagtcaaacgg-tt-gtgctag------caaag--g---agcagtggcgaacgaggtagtaataagcaggtacgaaccgagaagtcaggaatagtccgccgaaaggcgggttaatacttgatggtctcgcattagtaaag--------------atttatcgcttcttgatcggcctgttcgatatcagctagttggtagggtaatggcctaccaaggctatgacgtctaggggagctgagaggctgacccccaccgatggaactgagacacggtccatacacctacgggtggccgcagtcgagaatcttccgcaatgggcgaaagcctgacggagcgacg…
>CPR_PB4_Taylorbacteria_GCA_001821295.1
tatattaagagtttgatcctagctcaggatgaacgctggcggcgtggataaggcatgcaagtcaagggggcctatccc---ctacatagggaagaaggcaaccggcagacgaggtagtaatacatagatacgtaccccaaagtcgagcatagctagtcgaaagattaggtaattctcgatagcaccacatggttaaag--------------atttatcgctttgggagcggtctgtgcagtatcagctagttggtagggtaatggcctaccaaggctatgacgcttagggggagtgagagctcgatccccaccgatggaactgagaaacggtccatacacctacgggtggccgcagtcaagaaccttccgcaatgggcgaaagcctgacggagcgacg…
>CPR_PB4_Taylorbacteria_GCA_001822755.1
ttatttaagagtttgatcctagctcaggatgaacgctggcggcgtggataaggcatgcaagtcgaacgggtctatttcagacggctcaagaaagaggg-tagtggcagacgaggtagtaacaggtaggaacatacctttcacacaagtatagctccgcgaaagcggaggtaatccttgatggtctcgcacgaataaag--------cgcgtaattagtcggtgaaagaatggcctgcttagtatcagctagttggtagggtaatggcctaccaaggctatgacgcttagggggggtgagagcccgatccccaccgatggaactgaga-acggtccatacacctacgggtggctgcagtcgagaatcttccgcaatgggggaaaccctgacggagcgacg…
>CPR_PB4_Taylorbacteria_GCA_001822615.1
ttaatttagagtttgatcctagctcaggatgaacgctggcggcgtggataaggcatgcaagtcaaacgggt--attgtag------caa--------atcagtggcagacgaggcagtaataaataggtatgtcccggagagtcaggcatagctcgccgaaaggcgtggtaattcctgatagtcccgca-gggtaaag---------tcgca---agacgctctttgaacagcctgttcagtatcagctagttggtagggtaatggcctaccaaggcaatgacgcttaggggacctgagagggtgacccccgccgatgggactgcgaaacggcccatacatctacggatggcagcagccgagaatattcgacaatgcgcgaaagcgtgatcgagcgacg…
>CPR_PB4_Taylorbacteria_GCA_000999035.1
---aattagagtttgatcctagctcaggatgaacgctggcggcgtggataaggcatgcaagtcgagcgggtctactctaa-tttcacgagg--gaaggttagcggcagacgaggtagtaataagcaggaacgtaccatagagtcaggcatagctcatcgaaaggtgaggtaattcctgatagcctcgcaggagtaaag---------tcgca---ag-cgctctttgaacggcctgctcggtatcagctagttgg
>non-CPR_non-CPR_Cyanobacteria_NC_019689
--catggagagtttgatcctggctcaggatgaacgctggcggcgtgcctaacacatgcaagtcgaacggggtg------------------gaaacacctagtggcggacgggtgagtaacgcgtgagaatctgccttcaggacggggacaacagcgggaaactgctgctaatacccgatgtgccgcaa-ggtgaaag---------------aaattcgcctgaagaagagctcgcgtcagattagctagttgg
>non-CPR_non-CPR_Firmicutes_NC_019903
tttatggagagtttgatcctggctcaggacgaacgctggcggcgtgcctaacacatgcaagtcgaacggactagcgtttagtccctgctagacgttagttagtggcggacgggtgagtaacgcgtggaaacctacccattagaccgggacaacccttggaaacgagggctaataccggataagaatatttaaggaaagatggc----gaatatgctatcgttaatggatggatccgcgtctgattagctagttggtggggtaaaggcctaccaaggcgacgatcagtagccggcctgagagggtgaacggccacactgggactgagacacggcccagactcctacgggaggcagcagtggggaatcttccgcaatggacgaaagtctgacggagcaacg…
>non-CPR_non-CPR_Firmicutes_NC_015172
tttatggagagtttgatcctggctcaggacgaacgctggcggcgtgcctaacacatgcaagtcgaacggagaatattgagg-----gaattgatattcttagtggcgaacgggtgagtaacgcgtgggaacctgtcctcatgaccggaataacagttggaaacgactgctaatgccggataagcttttggaaggaaagctggc----gaatatgctagtgcaagagggtggacccgcgtctgattagctggttggtagagtaaaagcctaccaaggcgacgatcagtagccggcctgagagggtaaacggccacactgggactgagacacggcccagactcctacgggaggcagcagtggggaatcttccgcaatggacgaaagtctgacggagcaacg…
>non-CPR_non-CPR_Firmicutes_NZ_CP022121
ttattggagagtttgatcctggctcaggacgaacgctggcggcgtgcttaacacatgcaagtcgaacggtcaaggagcgagaccaatcttgcttcttgatagtggcggacgggtgagtaacgcgtgggaacctaccctaaacaccgggacaacagctggaaacggctgctaataccggataatctcttaagaggaaaggtggc---c---tatgctaccgattaaggatggacccgcgtctgattagctagttggtagggtaacggcttaccaaggcaacgatcagtagccggcctgagagggtgaccggccacactgggactgagacacggcccagactcctacgggaggcagcagtggggaatcttccgcaatgggcgcaagcctgacggagcaacg…
>non-CPR_non-CPR_Firmicutes_NC_021184
tttatggagagtttgatcctggctcaggacgaacgctggcggcgtgcttaacacatgcaagtcgaacggttctcgaagttcttcgacgaacttcgaggatagtggcggacgggtgagtaacgcgtggaaacctgcccaatagcctgggataacgccgggaaactggtgctaataccggatacgttcatttgaagaaaggt------------gcaaaccgctactggatgggtccgcgtcccattagctagttggtagggtaacggcctaccaaggcgacgatgggtagccggcctgagagggcgaccggccacactggaactgagacacggtccagactcctacgggaggcagcagtggggaatcttccgcaatgggcgcaagcctgacggagcaacg…
>non-CPR_non-CPR_Firmicutes_NC_015565
tttatggagagtttgatcctggctcaggacgaacgctggcggcgtgcctaacacatgcaagtcgaacggggtttagaatgacttg-cgatttctaaacctagtggcggacgggtgagtaacgcgtggaaacctgcctggtagaccgggataacagctggaaacggctgctaataccggatacgctcttgagaggaaag--------------ggaagccgctatcagatggatccgcgtcccattagctggttggtggtgtagcggaccaccaaggcgacgatgggtagccggcctgagagggcgaccggccacactgggactgagacacggcccagactcctacgggaggcagcagtggggaatcttccgcaatgggcgaaagcctgacggagcaacg…
>non-CPR_non-CPR_Firmicutes_NZ_CP014606
tttatggagagtttgatcctggctcaggatgaacgctggcggcgtgcttaacacatgcaagtcgaacgaacgacttttgacacttt---cagaagaagttagtggcggacgggtgagtaacacgtgggaatttacctttcagacagggataacaccgggaaactggtgctaatacctgatacgcttaggtgaggaaaagaggc---cgaagaagctcctgctgaaagataaacccgcgcctgattagctagttggtagggtaaaggcttaccaaggcgacgatcagtagccggcctgagagggtgaacggccacactgggactgagacacggcccagactcctacgggaggcagcagtggggaatattgcgcaatgggggaaaccctgacgcagcaacg…
>non-CPR_non-CPR_Firmicutes_NC_014220
---atggagagtttgatcctggctcaggacgaacgctggcggcgtgcctaacacatgcaagtcgagcggtccggcactcagatgtagctgagtgccggatagcggcggacgggtgagtaacgcgtgggaatctacccataagagggggataacactgggaaaccggtgctaataccgcataagctattcatagtaaaggtggc---ggagcaagctaccgcttatggatgagcccgcgtctgattagctagttgg
>non-CPR_non-CPR_Firmicutes_NC_008346
ttattggagagtttgatcctggctcaggacgaacgctggcggcgtgcctaacacatgcaagtcgaacggatttgggaggagtcctcacacttctcagattagtggcggacgggtgagtaacgcgtgggaacctacccataagcgggggataacagttggaaacggctgctaataccgcataagctgtacacagtaaagatggc---taacaaagctatcacttatggatgggcccgcgtctgattagctagttggtagggtagcggcctaccaaggcaacgatcagtagccggcctgagagggtggacggccacactgggactgagacacggcccagactcctacgggaggcagcagtggggaatattgcgcaataggggaaaccctgacgcagcgacg…
>non-CPR_non-CPR_Firmicutes_NC_007503
taaatggagggtttgatcctggctcaggacgaacgctggcggcgtgcctaacacatgcaagtcgagcgggggaagcgg--------tcaactgtttccttagcggcggacgggtgagtaacgcgtggggacctacctgtaagaccgggataaccctgggaaaccggggctaataccggatacgctatcgtaggaaagggtggc---ttagcatgctaccgcttacagatgggcccgcgtcctattagctagttggtagggtaatggcctaccaaggcgacgatgggtagccggcctgagagggtgaccggccacactgggactgagacacggcccagactcctacgggaggcagcagtgggggatattccgcaatgggcgaaagcctgacggagcgacg…
>non-CPR_non-CPR_Firmicutes_NC_013921
------gagagtttgatcctggctcaggacgaacgctggcggcgtgcctaacacatgcaagtcgagcggtccggcactcaa-----gttgggtggcggatagcggcggacgggtgagtaacgcgtgggaacctacccttaagaccgggatagcacctcgaaaggggtggtaatactggataagctccttggaggaaaggtagc-------aaagctaccgcttaaggatgggcccgcgtcccatcagctagttgg
>non-CPR_non-CPR_Firmicutes_NC_013385
---acggagggtttgatcctggctcaggacgaacgctggcggcgtgcctaacacatgcaagtcgagcgggcttgtcagggc-----gtcctggcaagttgagcggcggacgggtgagtaacgcgtgggaacctacccaggagactgggataaccctgggaaactggggctaataccggatacgctcctgggaggaaaggtggc---ttgaggcgctgccgctcctggatgggcccgcgtcccatcagctagttgg
>non-CPR_non-CPR_Firmicutes_NC_010718
-----ggagggtttgatcctggctcaggacgaacgctggcggcgtgcctaacacatgcaagtcgagcgaacccttcgggtcgcttcgcccggtcagggttagcggcggacgggtgagtaacacgtggaaacctaccccggagaccgggataacaggccgaaaggcctgctaataccggataatcttcatgaagtaaaggg------------ttcaaccgctctgggatgggtccgcgtcccattagctagttgg
>non-CPR_non-CPR_Firmicutes_NC_006177
tccacggagagtttgatcctggctcaggacgaacgctggcggcgtgcctaagacatgcaagtcgagcggggtttcagggct-----cggccctgagacccagcggcggacgggtgagtaacacgtggaaacctgccctctgctctgggataacaggccgaaaggcctgctaataccggataagctcacgggagaaaaggcgct---agtcagtggcgctggcagaggaggggtccgcggcccattagctggttggcggggtaacggcccaccaaggcgacgatgggtagccggcctgagagggcgaccggccacactgggactgagacacggcccagactcctacgggaggcagcagtcgggaattttgcacaatggccgaaaggctgatgcagcaacg…
>non-CPR_non-CPR_Firmicutes_NC_014098
ttcacggagagtttgatcctggctcaggacgaacgctggcggcgtgcctaatacatgcaagtcgagcgggtctccccgggg-----gccccggggagatcagcggcggacgggtgaggaacgcgtgggaacctgtccgacagaccgggacaacgcctggaaacgggcgctaattccggataggcgccaggcgggaaaggg------------gaaacccgctgtcgggtgggcccgcgtcgcattagctggttggtggggtaacggctcaccaaggcgacgatgcgtagccggtctgagagggtggacggccacactgggactgagacacggcccagactcctacgggaggcagcagtagggaatcttccgcaatgggcgaaagcctgacggagcgacg…
>non-CPR_non-CPR_Firmicutes_NZ_AP014924
----cggagagtttgatcctggctcaggacgaacgctggcggcgtgcctcatacatgcaagtcgagcggacccttggtgcgccttc---ggccaggggttagcggcggacgggtgagtaacgcgtgggaacctgccctccagagggggataactcgccgaaaggcgggctaataccgcatgagttccttggagcaaaggcctt----------cgggccgctggaggaggggcctgcgtcccattagctcgttgg
>non-CPR_non-CPR_Firmicutes_NC_015555
-----tgagagtttgatcctggctcaggacgaacgctggcggcgtgcctaacacatgcaagtcgagcgatccggcactcaacttacgttgagtgccggatagcggcggacgggtgagtaacgcgtggaaatctaccctgtagactgggataacaccccgaaaggggtgctaataccggataatgtcaagtgaagaaag------------gagaaatccgctataggatgagtccgcgtcccattagctagttgg
>non-CPR_non-CPR_Firmicutes_NC_015520
-aacaagagagtttgatcctggctcaggacgaacgctggcggcgtgcctaaaacatgcaagtcgaacggatatactaacat-----aatgggagtatattagtggcggacgggtgagtaacacgtgaaaacctgccctgtacagggggataacagaccgaaaggactgctaataccccatgagaccacagggtcaaagga------------gcaatccggtataggaggggttcgcggcccattagctagttgg
>non-CPR_non-CPR_Firmicutes_NZ_LT700187
ttaattaagagtttgatcctggctcaggacgaacgctggcggcgtgcttaacacatgcaagtcgaacgaagttatccagacccttc---tggatatacttagtggcggacgggtgagtaacgcgtgagaacctgccctgcaaagggggacaacagttggaaacgactgctaataccgcatgagaccacgaggtaaaagga------------tttattcgatgcaggatgggctcgcgtcccattagatagttggtgaggtaacggcccaccaagtcaacgatgggtagccgacctgagagggtgatcggccacactggaactgagacacggtccagactcctacgggaggcagcagtggggaatattgggcaatgggggaaaccctgacccagcaacg…
>non-CPR_non-CPR_Firmicutes_NC_011898
taatttgagagtttgatcctggctcaggacgaacgctggcggcgtgcctaacacatgcaagtcgagcggagttacctttagtatttgctgaaggtaacttagcggcggacgggtgagtaacgcgtgggaacctgcctgttacagggggataacacagggaaacttgtgctaataccgcataacacaacgttgtcaaagga------------gcaatccggtgacagatgggcccgcgtccaattagctagttggtgatgtaacggatcaccaaggcgacgattggtagccgaactgagaggttgatcggccacattgggactgagacacggcccagactcctacgggaggcagcagtggggaatattgcacaatgggggaaaccctgatgcagcaacg…
>non-CPR_non-CPR_Firmicutes_NC_020134
taatttgagggtttgatcctggctcaggacgaacgctggcggcgtgcctaacacatgcaagtcgaacgggatccgtgttactcttt---ggcatggtgagagtggcggacgggcgagtaacgcgtgagaacctgccctatgctgggggataacaccgggaaaccggtgctaataccgcataagaccacatggtaaaag--------------ctgaggcggcataggatgggctcgcgtccgattagctagttggtagggtaacggcctaccaaggcgacgatcggtagccggactgagaggttggccggccgcattgggactgagacacggcccagactcctacgggaggcagcagtggggaatattgcgcaatgggggaaaccctgacgcagcgacg…
>non-CPR_non-CPR_Firmicutes_NC_016048
tttatagagagtttgatcctggctcaggacgaacgctggcggcgtgcttaacacatgcaagtcgaacggagcacccttgatgtttc---gaggaatgcttagtggcggactggtgagtaacgcgtgagaacctgcctttcagagggggacaacagttggaaacgactgctaataccgcatgatacatttatgtcaaag--------------atttatcgctgaaagatggcctcgcgtctgattagatagttggtgaggtaacggcccaccaagtcgacgatcagtagccggactgagaggttgaccggccacattgggactgagatacggcccagactcctacgggaggcagcagtggggaatattgggcaatggacgcaagtctgacccagcaacg…
>non-CPR_non-CPR_Firmicutes_NC_014828
---ttggagagtttgatcctggctcaggacgaacgctggcggcgcgcctaacacatgcaagtcgagcggagtc----------------cttcgggacttagcggcggacgggtgagtaacgcgtgagaacctggccttcagagggggataacgtctggaaacggacgctaataccgcatgacatggcgccatcaaagga------------gtaatccgctgagggatgggctcgcgtccgattaggtagttgg
>non-CPR_non-CPR_Firmicutes_NC_013520
---ttggagagtttgatcctggctcaggacgaacgctggcggcgtgcttaacacatgcaagtcgaacgaagagcgatggaa-----cttctatcaatcttagtggcgaacgggtgagtaacgcgtaataacctgcccttcagagggggacaacagttggaaacgactgctaataccgcatacgatctaaagatgaaaggtggc---tttataagctatcactgaaggaggggattgcgtctgattagctagttgg
>non-CPR_non-CPR_Firmicutes_NZ_CP011388
-ttatggagagtttgatcctggctcaggacgaacgctggcggcgtgcctaatacatgcaagtcgagcggagttgatgagaa-----cttctctgatgctcagcggcggacgggtgagtaacacgtaggaacctgcctgtaagatcgggataactaccggaaacggtagctaagaccggatacacggttcctgggaaaagcgga-------caatctgctgcttacagatgggcctgcggcgcattagctagttgg
>non-CPR_non-CPR_Firmicutes_NC_018673
taaattgagagtttgatcctggctcaggatgaacgctggcggcgtgcctaatacatgcaagtcgaacgcacagcgaaaggt-----gcacctttcaagtgagtggcgaacgggtgagtaacacgtggaaacctgcctcaaggctggggataacatttggaaacagatgctaataccgaataaaacttagggttaaaaggcgc--------tacggcgtcacctagagatggatccgcggtgcattagttagttggtggggtaaaggcctaccaagacaatgatgcatagccgagttgagagactgatcggccacattgggactgagacacggcccaaactcctacgggaggctgcagtagggaatcttccacaatgggcgaaagcctgatggagcaacg…
>non-CPR_non-CPR_Firmicutes_NC_018610
taagatgagagtttgatcctggctcaggacgaacgctggcggcgtgcctaatacatgcaagtcgaacgcgtctccgttaatcttgcttaacattgagacgagtggcgaactggtgagtaacacgtgggaacctgcccttaagtaggggataacacttggaaacaggtgctaataccgtataacaaccaagtttaaaagacggc-------tcggctgtcactttaggatggacccgcggcgtattagcttgttggtaaggtaacggcctaccaaggcgatgatacgtagccgacctgagagggtaatcggccacattgggactgagacacggcccaaactcctacgggaggcagcagtagggaatcttccacaatggacgaaagtctgatggagcaacg…
>non-CPR_non-CPR_Firmicutes_NC_021175
-ttaatgagagtttgatcctggctcaggacgaacgctggcggcgtgcctaatacatgcaagtagaacgctgaaggaaggag-----gctctttccggaagagttgcgaacgggtgagtaacgcgtaggaacctaccttttagcgggggataactattggaaacgatagctaataccgcataagacattttgttaaaagatgc--------aaatgcatcactaagagatggacctgcgttgtattagctagtagg
>non-CPR_non-CPR_Firmicutes_NC_016894
tttattgagagtttgatcctggctcaggacgaacgctggcggtatgcttaacacatgcaagtcgaacgagacaagatggaaccttc---aaatcttagaaagtggcgaacgggtgagtaacgcgtgggaacctaccctatggaaaggaatagccccgggaaactgggtgtaataccttataagatatgtgtattaaag--------------ctccggcgccataggatggacccgcgtcccattagctagttggtgagataacagcccaccaaggcgacgatgggtaaccggtctgagagggcgaacggtcacactggaactgagacacggtccagactcctacgggaggcagcagtggggaatattgcgcaatgggggcaaccctgacgcagcaata…
>non-CPR_non-CPR_Firmicutes_NC_014614
atatttgagagtttgatcctggctcaggatgaacgctggcggcgtgcttaacacatgcaagtcgagcgggcaatttat---acttcctggataaattgctagcggcggacgggtgcgtaacacgtgggaacctgcccctatcactgggataacacactgaaaagtgtgctaataccagataatataagcttatcaaag---------------aatttcggatagggatgggcccgcgtctgattagctagttggtgaagtaacggctcaccaaggcaacgatcagtagccgacctgagagggtgatcggccacactggaactgagacacggtccagactcctacgggaggcagcagtggggaatattgcacaatgggcgaaagcctgatgcagcaacg…
>non-CPR_non-CPR_Firmicutes_NC_009922
ttaattgagagtttgatcctggctcaggatgaacgctggcggcgtgcctaacacatgcaagtcgagcggagatgaagaagt-----tactttggattcttagcggcggacgggtgagtaacgcgtgggaacctaccctgtacagggggataacaatgggaaaccattgctaataccccatgacgcctttaggtcaaag---------------aacttcggtacaggatgggcccgcgtctgattagctagttggtgaggtaatggctcaccaaggcgacgatcagtagccggcctgagagggtgaacggccacactggaactgagacacggtccagactcctacgggaggcagcagtggggaatattgcacaatgggggaaaccctgatgcagcaacg…
>non-CPR_non-CPR_Firmicutes_NC_016630
-aaacgaagagtttgatcctggctcaggatgaacgctggcggcgtgcttaacacatgcaagtcgaacgaacgactattaacctttc---tgatagaagttagtggcggacgggtgcgtaacgcgtgggaatctgcctttgtcaaaggaataactattcgaaagaatagctaaaaccgtataacatattaatatcaaaa--------------cgatagtggacaaagatgagcccgcgtctgattagctagttgg
>non-CPR_non-CPR_Firmicutes_NC_010001
taatttgagagtttgatcctggctcaggatgaacgctggcggcgtgcttaacacatgcaagtcgaacggagtttttaaatgccctc---tttagaaacttagtggcggacgggtgagtaacgcgtgggaacctgcctcatacagggggataacagtcggaaacgattgctaaaaccgcataatatagcgctatcaaat--------------atttataggtatgagatgggcccgcgtctgattagctagttggtggggtaatggcctaccaaggcgacgatcagtagccggcttgagagagtgaccggccacattgggactgagacacggcccaaactcctacgggaggcagcagtggggaatattggacaatgggggaaaccctgatccagcgacg…
>non-CPR_non-CPR_Firmicutes_NC_015275
ttttatgagagtttgatcctggctcaggatgaacgctggcggcgtgcttaacacatgcaagtcgaacgaactgcgaggagc-----tgctcctcaaagttagtggcggacgggtgagtaacgcgtgggaacctgccctatagagggggataacgtttggaaacgaacgctaataccgcataaactatcgatagtaaag--------------atttatcgctataggatggacccgcgttggattagctagttggtgagataacagctcaccaaggcgacgatccatagccggcctgagagggtgaacggccacattgggactgagacacggcccaaactcctacgggaggcagcagtggggaatattgcacaatgggcgcaagcctgatgcagcgacg…
>non-CPR_non-CPR_Firmicutes_NC_022571
tttattgagagtttgatcctggctcaggacgaacgctggcggcgtgcttaacacatgcaagtcgagcgatgaagcttc--------ttcggaagtggattagcggcggacgggtgagtaacacgtgggaacctgcctcatagaggggaatagccttccgaaaggaagattaataccgcataagattgtacaattaaag------------gagcaatccgctatgagatggacccgcgtcgcattagctagttggtgaggtaacggctcaccaaggcgacgatgcgtagccgacctgagagggtgatcggccacattgggactgagacacggcccagactcctacgggaggcagcagtggggaatattgcacaatgggggaaaccctgatgcagcaacg…
>non-CPR_non-CPR_Firmicutes_NZ_LT635475
ttacttgagagtttgatcctggctcaggacgaacgctggcggcgtgcttaacacatgcaagtcgaacgatgaagaagagaaacttctttcacttcggattagtggcagacgggtgagtaacgcgtgagaacctacctcttacaaagggatagcctcgggaaaccgtgattaataccatatgacacattcatgttaaag--------------ctacggcggtaagagatgggctcgcgtcccattagctagttggtgaggtaacggcccaccaaggcgacgatgggtaaccggcctgagagggtgaacggtcacattggaactgagacacggtccaaactcctacgggaggcagcagtggggaatattgcacaatggagggaactctgatgcagcgacg…
>non-CPR_non-CPR_Firmicutes_NZ_CP009761
taaatagagagtttgatcctggctcaggacgaacgctggcggcgtgcttaacacatgcaagtcgaacgtgatttttgtggactttc---aatgaaatgaaagtggcgaacgggtgagtaacacgtgagaacctaccttacacagggggatagccgttggaaacgacgattaataccgcatgagaccacagggtcaaag--------------atttatcggtgtaagaagggctcgcgtctgattagctagttggaagggtaaaggcctaccaaggcgacgatcagtagccggtctgagaggatgaacggccacattggaactgagacacggtccaaactcctacgggaggcagcagtggggaatattgcacaatggggggaaccctgatgcagcgacg…
>non-CPR_non-CPR_Firmicutes_NZ_LT635772
ttttatgagagtttgatcctggctcaggattaacgctggcggcgtgcataacacatgcaagtcgaacgatgaaacctaatttcttc---ttagatggattagtggcggacgggtgagtaacgcgtgagaacctgccttagagaaggggatagcctttggaaacgaagaataataccctatgaaaccaactggtcaaag--------------atttatcgctctaagatggacttgcgtctgattagctagttggtgagataacagctcaccaaggcaacgatcagtagccggcttgagagagtgtacggccacattgggactgagacacggcccagactcctacgggaggcagcagtggggaattttgcacaatgggggaaaccctgatgcagcgacg…
>non-CPR_non-CPR_Firmicutes_NC_008528
taaattgagagtttgatcctggctcaggatgaacgctggtggcgtgcctaatacatgcaagtcgtacgctagccgctgaatccttcgaggcaatgactagagtggcgaactggtgagtaacacgtaagaacctgccctttagtgggggataacatttggaaacagatgctaataccgcgtaacaacaaagtttgaaaggtcct---------ttggatcgctagaggatggtcttgcggcgtattagcttgttggtagggtagaagcctaccaaggcaatgatgcgtagccgagttgagagactggccggccacattgggactgagacactgcccaaactcctacgggaggctgcagtagggaattttccgcaatgcacgaaagtgtgacggagcgacg…
>non-CPR_non-CPR_Firmicutes_NZ_CP013213
caaatggagagtttgatcctggctcaggatgaacgctggcggcgtgcctaatacatgcaagtcgaacgaacggacctagaa-----tttttagagaagttagtggcgaacgggtgagtaatacataaaaacctgccccaatgcctgggataacagttggaaacgactgctaataccggataggtttagaaaagtaaagatggg---------atacatcacaatgggatggatttatggcgcattagttagttggtgaggtaacggctcaccaagacgatgatgcgtagccggcctgagagggtgaccggccacactgggactgagacacggcccagactcctacgggaggcagcagtagggaattttcggcaatgggggaaaccctgaccgagcgacg…
>non-CPR_non-CPR_Firmicutes_NZ_CP011391
caaatggagagtttgatcctggctcaggatgaacgctggcggcatgcctaatacatgcaagtcgaacgagagaccttc---------------ggtctctagtggcgaacgggtgagtaacacgtaggaacctgcccgcgcaccgggaatacgctctggaaacggagaacaaatcccgatgtacaggaactgtgaaa-atcct-------taggggatggggcgcggatggacctgcggtgcattagttggttggcggggtaaaggcccaccaagacgatgatgcatagccggcctgagagggcggacggccacattgggactgagacacggcccagactcctgcgggaggcagcagtagggaattttcgtcaatgggcgcaagcctgaacgagcgatg…
>non-CPR_non-CPR_Firmicutes_NC_014654
taaacggagagtttgatcctggctcaggacgaacgctggcggcgtgcttaacacatgcaagtcgaacggtctacctcgacgccttcagacgagactagatagtggcggacgggtgagtaacacgtggaaacctgtcctcaagtctgggataacctggcgaaagtcgggctaatcccgggtaagctgagatcagaaaaggtgct---------tagcatcgtttgaggaggggtccgcggtagattagctagctggtgaggtaatggctcaccagggcaacaatctatagctggtctgagaggacgatcagtcacactggaactgagacacggtccagactcctacgggaggcagcagtggggaatcttccacaatgggcgaaagcctgatggagcaacg…
>non-CPR_non-CPR_Firmicutes_NC_019978
tattcggagagtttgatcctggctcaggacgaacgctggcggcgtgcttaacacatgcaagttgtgcgagaaagttac----ctt-cgggtaacaagtaaagcagcgaacgggtgagtaacgcgtaagtatctacctttaagtctgggataactcttcgaaagaggggctaataccagatatactccttggaggaaagatggt---------tactattgcttaaagatgagcttgcgtcccattagctagttggtgagataacagctcaccaaggcaacgatgggtagccgacctgagagggtgatcggccacactgggactgagacacggcccagactcctacgggaggctgcagtggggaatcttccgcaatgggcgaaagcctgacggagcaacg…
>non-CPR_non-CPR_Firmicutes_NC_014378
ttatcggagagtttgatcctggctcaggacgaacgctggcggcgtgcctaacacatgcaagtcgcgcgagaaagctgc---tctt-tgagcagttagtaaagcggcggacgggtgagtaacgcgtgagaatctacctttaagtctgatataacttctcgaaagggaagctaatttcggatattatgctggcatcaaaggcggc---------tgcctccgcttttagatgtgctcgcgtcccattagcttgttggtgagataacagctcaccaaggctgcgatgggtagccgacctgagagggtgatcggccacactgggactgagacacggcccagactcctacgggaggctgcagtggggaatctttcgcaatgagcgcaagcttgacgaagcgacg…
>non-CPR_non-CPR_Firmicutes_NC_009437
ttaattgagagtttgatcctggctcaggacgaacgctggcggcgtgcctaacgcatgcaagtcgagcggagatggtggttggtgatgaggctgccatcttagcggcggacgggtgagtaacacgtgagaacctacccccagcacggggataacagctcgaaagggctgctaatacccgatgggaccacgtggtgaaaggtagc---gggaggctatactggctggggatgggctcgcggcccatcagctagttggtggggtaacggcctaccaaggcgacgacgggtagccggcctgagagggtgtacggccacagtgggactgagacacggcccacactcctacgggaggcagcagcggggaatcttgcgcaatgggcggaagcctgacgcagcgacg…
>non-CPR_non-CPR_Firmicutes_NC_019954
-aacatgagagtttgatcctggctcaggacgaacgctggcggcgtgcctaacacatgcaagtcgagcgaaggataagctgcacttc---agcttaaacttagcggcggacgggtgagtaacacgtaggaacctgcccatgacacggggatagcttcgggaaaccgaaggtaatacccggtacctttaca-aaagaaag------------cgacaaagcggtcatggatgggcctgcgtcccattagctagttgg
>non-CPR_non-CPR_Firmicutes_NC_015499
--tatggagggtttgatcctggctcaggacgaacgctggcggcgtgcctaacacatgcaagtcgaacggagatagaag--------cttgcttctatcttagtggcaaacgggtgagtaacgcgtgggaacctacccttaagtgggggataacaggtcgaaaggcctgctaataccgcatacctttcaagaaagaaag------------gagtaatccgcttgaggaggggcctgcgtcctatcaggtagttgg
>non-CPR_non-CPR_Firmicutes_NC_011295
---acggagggtttgatcccggctcaggacgaacgctggcggcgtgcctaatgcatgcaagtcgagcgggctacgatc--------tcggattgtagcttagcggcgaacgggtgagtaacacgtaggaatctacccttcagaggaggacaacctcaggaaactgaggctaaaccttcatacgttcact-gaagaaaggt------cttaaaggtagctgctgaaggatgagcctgcggcccatcaggtagttgg
>non-CPR_non-CPR_Tenericutes_NZ_CP010899
tttaatgagagtttgatcctggctcaggatgaacgctggcggcatgcctaatacatgcaagtcgaacggggtg------------------cttgcacccagtggcgaacgggtgagtaacacgtatcaatctacccattagcgggggataacagttggaaacgactgctaataccgcatatgacattttgttaaaaggtccg---------ttggatcactaatggatgaggatgcggcgtattagttagttggtagggtaatggcctaccaagacaatgatacgtagccgaactgagaggttgatcggccacatcgggactgagacacagcccgaactcctacgggaggcagcagtagggaatttttcacaatgggcgaaagcctgatggagcaatg…
>non-CPR_non-CPR_Tenericutes_NC_005303
-atacgaagagtttgatcctggctcaggattaacgctggcggcgtgcctaatacatgcaagtcgaacggaagtttaag-----------aattaaactttagtggcgaacgggtgagtaacgcgtaagaatctgcccctaagacgaggataacagttggaaacgactgctaagactggataggagacaattttaaaag--------tagcaataggtatgcttagggaggagcttgcgtcacattagttagttgg
>non-CPR_non-CPR_Tenericutes_NC_007295
aatcatgagagtttgatcctggctcaggataaacgctagctgtgtgcttaatacatgcatgttgaacggaatattttagt------tcgctaaaatatttagtagcaaatgggtgagtaacacgtaccaacctaccttttggactgggataaccattggaaacagtggctaataccggatatgataaaatattcaaaggagct-------tcaagcttcaccaagaaatgggggtgcgcaacattagttagttggtagggtaaaagcctaccaagacgatgatgtttagcggggccaagaggttgtaccgccacactgggattgagatacggcccagactcctacgggaggcagcagtaaggaatattccacaataagcgaaagcttgatggagcgaca…
>non-CPR_non-CPR_Tenericutes_NC_009497
tttttcgagagtttgatcctggctcaggatgaacgctggctgtgtgcctaatacatgcatgtcgagcgatgat----------------agcaatatcatagcggcgaatgggtgagtaacacgtactaacgtaccttttagattgggatagcggatggaaacatccgataataccgaatacttattatatataaaaggaagc---------ttgcttcgctagaagatcggagtgcgcaacattagctagttggtgaggtaacggcccaccaaggcgatgatgtttagcggggttgagagattgatccgccacactgggactgagatacggcccagactcctacgggaggcagcagtagggaatattccacaatggacgaaagtctgatggagcgaca…
>non-CPR_non-CPR_Tenericutes_NC_000908
ttttctgagagtttgatcctggctcaggattaacgctggcggcatgcctaatacatgcaagtcgatcggaagt----------------agcaatactttagaggcgaacgggtgagtaacacgtatcaatctaccttataatgggggataactagttgaaaaactagctaataccgcataagaactttagttgaaagga------cctgcaagggttcgttatttgatgagggtgcgccatatcagctagttggtagggtaatggcctaccaaggcaatgacgtgtagctatgctgagaagtagaatagccacaatgggactgagacacggcccatactcctacgggaggcagcagtagggaatttttcacaatgagcgaaagcttgatggagcaatg…
>non-CPR_non-CPR_Tenericutes_NC_010503
attttaaagagtttgatcctggctcaggattaacgctggcggcatgcctaatacatgcaaatcgaacgaagcctttta-----------------ggcttagtggtgaacgggtgagtaacacgtatcaatctacccttaagttggggataactagtcgaaagattagctaataccgaataataacatctgtagaaag--------tctttgtggcgacgcttttggatgagggtgcgacgtatcagatagttggtgaggtaatggctcaccaagtcaatgacgcgtagctgtactgagaggtagaacagccacaatgggactgagacacggcccatactcctacgggaggcagcagtagggaatttttcacaatgggcgcaagccttatgaagcaatg…
>non-CPR_non-CPR_Tenericutes_NC_015155
tttgatgagagtttgattctggctcaggattaatgctggtggtatgcataacacatgcaagtcgaacgaaaaaggccc-----------cgggtctttttagtggcaaacgggcgagtaacgcatactaacttacttatctgaggaaaatagcagctcgaaagagctattaataatccataggtttaggaaattaaaggaggc-----cgcagtg--ttgcgggtaaataggagtatgtcctattagatagttggagaggtaaaggctcaccaagtcgatgatgggtagctggactgagaggttgaacagccgcaatgggattgagatatggcccatattcctacgggaagcagcagtgaggaatttttcacaatggacgaaagtctgatggagcaata…
>non-CPR_non-CPR_Armatimonadetes_NZ_CP007139
tcttcggagagtttgatcatggctcaggacgaacgctggcggcgtgcctaaaacatgcaagtcgaacgagggtagtaa-----------------accttagtggcgaacggcggagtaatacataagaacgtgccccgaagactgggatatacagccgaaaggctgggcaataccggatgtgacggaaccattaaa-------------cagtt-tttgcttcgggagcggcttatggcctatcaggtagttggtgaggtaacggctcaccaagccgacgacgggtagcgggtctgagaggatggtccgctcgagtgggactgagacacggcccacacacctacgggtggcagcagttgggaatcttgcacaatgggggaaaccctgatgcagcgacg…
>non-CPR_non-CPR_Chloroflexi_NC_013523
--gatggagagtttgatcctggctcaggaacaacgctggcggcgtgcctaatgcatgcaagtcgtacgggagccgctt-----------tggcggtcgaccgtggcggacgggtgaggaacacgtgggaacctgccccggcgcgggggataaccgcgggaaaccgtggctaataccccatgggctcggtcgagcaaag------------gcggaagccgtgccgggaggggcctgcggcctatcagctagacgg
>non-CPR_non-CPR_Chloroflexi_NZ_LT859958
-----ggagagtttgatcctggctcaggatgaacgttggcggcgtgcctaatacatgcaagtcgaacggagaatttgatgt-----acattgaatttcttagtggcgaacgggtgagtaacgcgttgggacctaccccaaagagcgggataacggtttgaaaagaccgctaatacctcatgtgatcatatgattaaaggagc----------ttgctccgctttgggaggggccagcgtaccatcagctggttgg
>non-CPR_non-CPR_Chloroflexi_NC_017079
-tgatggagagtttgatcctggctcaggatgaacgctggcggcgtgcctaacacatgcaagtcgaacgtgaggggtgt--------tcggatgccctgaaagtggcgaacgggtgagtaacacgtagaaacctgccctggagtgggggataaccactggaaacggtggctaataccgcataggccccaagggggaaag--------------ctccggcgctccaggaggggtctgcgtccgattagctagttgg
>non-CPR_non-CPR_Chloroflexi_NZ_CP018258
----tggagagtttgatcctggctcaggatgaacgctagcggcgcgccttatgcatgcaagtcgtacggtccc------------------gcaagggacagtggcaaacgggtgagtaatagttaggaacctgcctttaagtgggggataacacttcgaaagaagtgctaataccgcatgtggtgctctcactaaaa------------ccgcaaggtgcttgaagaggggcctgattccgattagctagttgg
>non-CPR_non-CPR_Chloroflexi_NC_010175
-------agagtttgatcctggctcaggacgaacgctggcggcgtgcctaatgcatgcaagtcgaacgcagcaggcgt-------------gcctggctgcgtggcgaacggctgaggaacacgtggggacctgccccggagtgggggataccccgtcgaaagacgggacaatcccgcatacgctcgacggaggaaag------------ccgcaaggcgctctgggaggggcctgcggcccatcaggtagttgg
>non-CPR_non-CPR_Chloroflexi_NC_009767
---atgaagagtttgatcctggctcaggacgaacgctggcggcgtgcctaatgcatgcaagtcgaacgcacgcgcttc---------------gcgcgtgagtggcgcacggctgagtaacacgtgggaacccgccctccggtgggggataacgagacgaaagtcgcgctaatcccgcatacgtccgcaaggggaaag----------cgcttcggcgcgccggaggaggggcctgcggcccatcaggtggttgg
>non-CPR_non-CPR_Thermobaculum_NC_013525
---atggagagtttgatcctggctcaggatgaacgctggcggcgtgcctaacgcatgcaagtcgtgcgggtagacctt-------------gggtctgccagcggcgaacgggtgagtaacacgtgggaacctgccgtctggtgggggataaccctcagaaatgggggctaataccgcatgatgatcctggatgaaag------------ccgcaaggcgccaggcgaggggcccgcggcccatcagctagttgg
>non-CPR_non-CPR_Actinobacteria_NZ_CP008802
tatatggagagtttgatcctggctcaggacgaacgctggcggcgtgcttaacacatgcaagtcgaacgatgaagctcggaa-----gtttcgggtggattagtggcgaacgggtgagtaatacgtgggaacctgccctcctttttgggataagccttggaaacggggtctaataccgaatattctggcgttgggaaag--------------ttttagcgaagggggatgggctcgcggcctatcagcttgttggtggggtgatggcctaccaaggcggtgacgggtagccggcctgagagggtgaccggccacattgggactgagatacggcccagactcctacgggaggcagcagtgggggatattgcacaatgggcgaaagcctgatgcagcgacg…
>non-CPR_non-CPR_Actinobacteria_NC_021064
tcattggagagtttgatcctggctcaggacgaacgctggcggcgtgcttaacacatgcaagtcgaacggaaaggcccc--------tttgggggtactcgagtggcgaacgggtgagtaacacgtgagaacctgcccttgacttcgggataacttcaggaaactggggctaataccggataggaatcctgttggaaag--------------cttcggcggttttggatggactcgcggcttatcagcttgttggtggggtagtggcttaccaaggctttgacgggtagccggcctgagagggcgaccggccacattgggactgagatacggcccagactcctacgggaggcagcagtggggaatattgcacaatgggcggaagcctgatgcagcaacg…
>non-CPR_non-CPR_Actinobacteria_NC_014165
----tggagagtttgatcctggctcaggacgaacgctggcggcgtgcttaacacatgcaagtcgagcgaggaccgcac---cttt-tgggtgtggagccgagcggcgaacgggtgagtaacacgtgagaacctgcccctggctctgggatagccctgggaaaccgggattaataccggatatgaccgctggtggaaaggttcc---cttgtggggttccggccggggatgggctcgcggcctatcagcttgttgg
>non-CPR_non-CPR_Actinobacteria_NC_020546
tttgtggagggttcgattctggctcaggatgaacgctggcggcgtgcttaacacatgcaagtcgaacgggatcctgcaagc-----tgcttgcgggtgagagtggcgaacgggtgagtaatgcgtgacaacctgccccatgctccggaatagctcctggaaacgggtggtaatgccggatgtgccgggcccgggaaag--------------ctctggcggcgtgggatggggtcgcgtcctatcagcttgttggcggggtgagggcccaccaaggcttcgacgggtagccggcctgagagggcgaccggccacattgggactgagatacggcccagactcctacgggaggcagcagtggggaatattgcacaatgggcgcaagcctgatgcagcgacg…
>non-CPR_non-CPR_Actinobacteria_NZ_CP007514
---tcggagagtttgatcttggctcaggacgaacgctgacggtgtgctttagacatgcaagtcgaacgagaaagccct-----------ggggtgagtaaagtggcgaacgggtgagtaacacgtgggaacctgcccctcgcagggggacaaccggaggaaactccggctaataccccgtacgcttgtccaaggaaaggtagc-----ttcggccatccggcgagggatgggcccgcggtacattagctagttgg
>non-CPR_non-CPR_Actinobacteria_NC_013739
-----ggagagtttgatcctggctcaggacgaacgctggcggcgtgcctaatacatgcaagtggagcgacgaaccagg--------ttgccctggggcaaagccgcgaacgggtgagtaacacgtgggaacctgccctgatgattgggacaacccgaggaaactcgggctaataccaaatgtgctcctctgaggaaaggtagc-----ttcggctaaccgcatcaggatgggcccgcggcccattagcttgttgg
>non-CPR_non-CPR_Actinobacteria_NC_013204
taaacggagagtttgatcctggctcaggatgaacgctggcggcgtgcctaacacatgcaagtcgaacgatgaaaccgc--------tcgggcggacatgaagtggcgaacgggtgagtaacacgtgacaacctgccccttgctccgggacaaccttgggaaaccgaggctaataccggatactcctcgcccgggaaag--------------cccagacggcaagggatggggtcgcggcccattaggtagtaggcggggtaacggcccacctagcccgcgatgggtagccgggttgagagaccgaccggccacattgggactgagatacggcccagactcctacgggaggcagcagtggggaattttgcgcaatgggggaaaccctgacgcagcaacg…
>non-CPR_non-CPR_Fusobacteria_NC_014632
tgaatgaagagtttgatcctggctcaggatgaacgctgacagaatgcttaacacatgcaagtcgactggaattcacct--------tcgggtgatagtacggtggcggacgggtgagtaacgcgtaaaaacttgccctctagactgggacaactgttggaaacgacagctaataccggatattatggaactatgaaag------------gctatatgcgctagaggagagctttgcgtcccattagttagttggtagggtaatggcctaccaagacgatgatgggtagccggcctgagagggtgatcggccacaaggggactgagacacggcccttactcctacgggaggcagcagtggggaatattggacaatggctaaaagtctgatccagcaatt…
>non-CPR_non-CPR_Fusobacteria_NC_013192
tgaatgaagagtttgatcctggctcaggatgaacgctgacagaatgcttaacacatgcaagtctttggcaaatctgtgc-------ttgcacagcctagccaaggcggacgggtgagtaacgcgtaaaaacttgccctgcagacagggataacagacggaaacgactgataatacctgatataattgccgaatgaaa----------------agtgatgctgcaggagagctttgcgtcctattagcttgttggtgaggtaatggctcaccaaggcgatgataggtagccggcctgagagggtgaacggccacaaggggactgagatacggcccttactcctacgggaggcagcagtggggaatattggacaatgggggcaaccctgatccagcaatt…
>non-CPR_non-CPR_Synergistetes_NC_018024
tgaacggagagtttgatcctggctcaggacgaacgctggcggcgcgcttaacacatgcaagtcgtgcggtgtcgaaggcaatcttacaagccttcgacacagcggcgaacgggtgagtaacacgtgagag-ctgtcctaaggagggggataacgcctggaaacgggtgctaataccccatatgcctcgc-ggtgaaag--------tgtacttgttacagccttagggtgtgctcgcggcctatcagctagttggtgaggtaacggctcaccaaggctaagacgggtagccggcctgagagggtgtacggccacactggaattgagatacggtccagactcctacgggaggcagcagtggggaatcttgggcaatgggcgaaagcctgacccagcgacg…
>non-CPR_non-CPR_Synergistetes_NC_014011
tttatggagagtttgatcctggctcaggacgaacgctggcggcgtgcttaacacatgcaagttgaacgggacggatattgattttcggatatatttgtttagtagcggacgggtgagtaatgcatgagaacctgcccttcagagggggacaacagttggaaacggctgctaataccccatatgccgaga-ggtgaaag------------gagcgatccgctgaaggagtggctcatgtcctatcagctagttggtgaggtaagtgctcaccaaggcgatgacgggtagccggcctgagagggcgaccggccacactggaactgagatacggtccagactcctacgggaggcagcagtggggaatattgggcaatgggcggaagcctgacccagcgacg…
>non-CPR_non-CPR_Synergistetes_NZ_CP016757
--aacggagagtttgatcctggctcaggacgaacgctggcggcgtgcctaacacatgcaagtcgaacgaaattacgaagaa-----tttaatcgtaatttagtggcggacgggtgagtaacgcgtgaggacttgtcggatacagggggacaacagatggaaacgtctgctaataccccataagccttcg-ggtaaaag------------gagcaatccggtatttgagagactcgcgttctatcagctagtagg
>non-CPR_non-CPR_Deinococcus-Thermus_NC_015387
-tgatggagagtttgatcctggctcagggtgaacgctggcggcgtgcctaagacatgcaagtcgagcggggggtctttggc-----tgctgggggctcctagcggcggacgggtgagtaacgcgtagggacctacccggaagtgggggacaacccggggaaactcgggctaatcccgcatgtggacgcgtgtctaaag------------gcgcgagccgcttccggatgggcctgcgtcccatcagctggttgg
>non-CPR_non-CPR_Deinococcus-Thermus_NZ_CP011387
tttttggagagtttgatcctggctcagggtgaacgctggcggcgtgcttaagacatgcaagtcgaacgaacagagctt---------------ctctgttagtggcgcacgggtgagtaacgcgtaacgacctacccccaagtcgtggataacgtgccgaaaggtgcgctaatacatgatgtgctgtccccagtaaag-------------gtttatctgcttggggatggggttgcgttccatcagctagttggcggggtaaaggcccaccaaggcaacgacggatcgccggcctgagagggtggccggccacaggggcactgagacacgggtcccactcctacgggaggcagcagttaggaatcttccacaatgggcgcaagcctgatggagcgacg…
>non-CPR_non-CPR_Deinococcus-Thermus_NC_014221
---ttggagagtttgatcctggctcaggatgaacgctggcagtgtgcctaagacatgcaagtcgaacggaggttttagagc-----tgctctaaggccttagtggcgaacgggtgagtaacacgtggggacctacccccaagtgcggcataacttcgggaaaccggagctaattccgcatgtgcctgtacaggtaaag-------------attgtatcgcttggggatgggcccgcggcgcatcagctagttgg
>non-CPR_non-CPR_Thermotogae_NC_009828
----tggagggtttgatcctggctcagggtgaacgctggcggcgtgcttaacacatgcaagtcgcgcggggaaacccc--------tcggggggagtaccagcggcgcacgggtgagtaacacgtgggaacctacccctcagcgggggataaccgggggaaactccggctaataccccatattatccggggatgaaaggagcg---------ttgcttcgttgagggatgggcccgcggcccatcaggtagttgg
>non-CPR_non-CPR_Thermotogae_NC_017095
agcttggagggtttgatcctggctcagggtgaacgctggcggcgtgcctaacacatgcaagtcgagcggtgcagctggagg-----gctgaaggctgcatagcggcggacgggtgcgtaacgcgtaggaacgtgccccctggaggcggatagccgcgggaaactgcgggtaaaccgccatagactcggg-gagtaaag------------ccggaaggcgccaggggagcggcctgcgtcccatcaggtagttggtagggtaacggcctaccaagccgacgacgggtagccggtctgagaggatggccggccacaagggcactgagacacgggccctactcctacgggaggcagcagtgggggatattggacaatgggcgaaagcctgatccagcgacg…
>non-CPR_non-CPR_Thermotogae_NC_017934
tggatggagggtttgatcctggctcagggtgaacgctggcggcgtgcttgacacatgcaagtcgaacggtat--------------gtggcaacacatagagtggcgaacgggtgagtaacacgtgggaacgtaccctacgcagggggataactgaccgaaaggacagctaataccgcataagaccgaa-ggtgaaaggtgc--------aaatgcatcggcgaaggagcggcccgcggaccatcagctagttggtggggtaagagcctaccaaggcgacgacggttagccggcgtgagagcgtggccggccacaaggacactgagatacgggtcctactcctacgggaggcagcagtgcggaattttagataatggaggcaactctgatctagcgacg…
>non-CPR_non-CPR_Thermotogae_NC_016751
tggatggagggtttgatcctggctcagggcgaacgctggcggcgtgcttaacacatgcaagtcgaacgaggaggcagc----ctt-cgggctgtagtactagtggcgaacgggtgagtaacgcgtaggaaggtgtcctccagaccgggacaaccactggaaacggtggctaataccggatgagcccgag-ggggaaagcgagc-------taaggcttggctggaggagctgcctgcgacccatcaggtagttggtagggtaaaggcctaccaagccgacgacgggtagccggcgtgagagcgtggccggccacaggggcactgagacacgggtcccactcctacgggaggcagcagtggggaatattggacaatggggggaaccctgatccagcgacg…
>non-CPR_non-CPR_Thermotogae_NZ_LN824141
aggatgaagggtttgatcctggctcagggttaacgctggcggcgtgcctaacacatgcaagtcgaacggttctaagcg-----------gagcttaggatagtggcgaacgggtgagtaaaaggtaggaatctaccccttggacggagatagctactggaaacggtaggtaaacttcgataagcccgag-ggggaaag------------ggtgagacagccgagggatgagcctactctccatcaggtagttggtgagataaaagcttaccaagccgatgacggataaccggtgtgagagcatgaacggtcacaagggcactgagagacgggccctactcctacgggaggcagcagtggggaatcttggacaatgggcgaaagcctgatccagcgacg…
>non-CPR_non-CPR_Dictyoglomi_NC_011661
-----ggagggtttgatcctggctcaggacgaacgctggcggcgtgcctaaggcatgcaagtcgagcggtagctcctattg-----ccgataggagtgagagcggcgcacgggtgagtaacacgtaggaacctaccccagagagggggataacacctcgaaaggggtgctaaacccccatatacttacctaaggaaagggtat---ggggtactatgctgctctgggatgggcctgcggcctatcagctagttgg
>non-CPR_non-CPR_Caldiserica_NC_017096
ttttcggagagtttgatcctggctcaggatgaacgctggcggcgtgccttacacatgcaagtcgagcggagaagattt--------acaggagtcttcttagcggcaaacgggtgagtaatggatgagaacctgccctgtagacggggatagccatccgaaaggatgggtaatacccgataatgttgga-aaagaaaggtgg------cgcaagctaccgcttcaggatgggctcatctcctatcagctagttggtgaggtaatggctcaccaaggctatgacgggtagctggcctgagagggtggtcagccacattgggactgagacacggcccagactcctacgggaggcagcagtggggaatcttggtcaatgggcgaaagcctgaaccagcgacg…
>non-CPR_non-CPR_Aquificae_NC_015185
ttgctggagagtttgatcctggctcagcgcgaacgctgtcggcgtgcctaacacatgcaagtcgtggggcagcaggcgggtcctttaacccgtgctggcgaccggcgaacgggtgagtaacgcgtgagaacctaccccgaggagggggataacccggggaaactcgggctaataccccataagcgcacggtgaaaagggtggc---tttgcaagctgccgcctcgggatgggctcgcgtcccatcaggtagttggtgaggtaacggctcaccaagcctacgacgggtagccggcctgagagggtggtcggccacaccgggactgagacacggcccggactcctacgggaggcagcagtggggaatcttgggcaatgggcgcaagcctgacccagcgacg…
>non-CPR_non-CPR_Aquificae_NZ_AP013035
tgcacggagggtttgatcctggctcagcgcgaacgctagcggcgcgcctaacacatgcaagtcgtggggcagcaggccgaaccttcattcggtgctggcgaccggcggacgggtgagtaacgcgtgagaacctacccctaggaccgggataaccctccgaaaggggggctaataccggataagctcacg-gagaaaagggggc---ttagcatgctcccgcctagggatgggctcgcgtcccatcagctagttggtggggtaacggcccaccaaggctatgacgggtagccggcctgagagggtggtcggccacacgggcactgagacacgggcccgactcctacgggaggcagcagtggggaatattgggcaatgggcgcaagcctgacccagcgacg…
>non-CPR_non-CPR_Aquificae_NZ_CP007028
ttcctgaagagtttgatcctggctcagcgcgaacgctggcggcgtgcctaacacatgcaagtcgtgcggaggggtgat-------------gagcccctcagcggcaaacgggtgagtaacacgtgagaacctgcccctgggaaggggataaccctccgaaaggggggctaataccctatatagccgggcggtgaaaggtggc---cgggcatgctaccgcccagggaggggctcgcggcccatcaggtagttggtggggtaacggcctaccaagcctatgacgggtagccggcctgagagggtggccggccacagtgggactgagacacggcccacacccctacggggggcagcagtggggaatcgtgggcaatgggcgaaagcctgaccccgcgacg…
>non-CPR_non-CPR_Aquificae_NC_012438
---ttggagagtttgatcctggctcagcgcgaacgttggcggcgtgcctaacacatgcaagtcgcggggcagcaggct---ccttctaatagtgctggcgaccggcaaacgggtgagtaacgcgtagcaacctacccataggttggggataaccatccgaaagggtggctaatacccaataatgaggag----caaag------------cttttgggcgcctatggatggggctgcgtcccatcagctagttgg
>non-CPR_non-CPR_Gemmatimonadetes_NZ_CP011454
ctattggagagtttgatcctggctcaggacgaacgctggcggcgtgcttaacacatgcaagtcacgggggccc------------------gcaagggtaaccggcgaacgggtgcgtaacacgtgagaatctgccgtactctgggggatagccggcccaacggccgggtaataccgcatacgcttgtccaaggaaa---------------ctccgggggagtacgaggagctcgcggcctatcagctagttggtggggtaacggcctaccaaggcattgacgggtagctggtctgagaggatggccagccacattgggactgagatacggcccagactcctacgggaggcagcagtggggaatattgcgcaatggccgcaaggctgacgcagcgacg…
>non-CPR_non-CPR_Fibrobacteres_NC_017448
tcaatgaagagtttgatcctggctcagaacgaacgctggtggcgtgtcttatacatgcaagtcgagcgaggca--------------------aatgccgagcggcgaacgggtgagtaacgcgtaagaatctgccccatatcaggaaatacccgtgccaacgcgcggttaatgtccaggagagtggcctgactagag--------------att-atcggtatgggatgagcttgcgtccgattagctagttggcggggcaacggcccaccaaggcgacgatcggtagccggcctgagagggtgatcggccacattgggactgagatacggcccagactcctacgggaggcagcagtagggaatattgcacaatgggggaaaccctgatgcagcaacg…
>non-CPR_non-CPR_Calditrichaeota_NZ_CP018099
----tggagagtttgatcctggctcaggacgaacgctggcggcgtgcctaacacatgcaagtcaaggggaaaggcgga----cttcggtttgccgagtatactggcggacgggtgagtaacgcgtaggaacctgcccttatgtctgggataacctcgagaaatcggggctaataccggataaggtcaattgattaaaggtgcc-------caaggtactgcataaggatgggcctgcgttccattagctagatgg
>non-CPR_non-CPR_Ignavibacteriae_NC_018178
acaacggagagtttgatcctggctcaggacgaacgctggcggcgtgcttaacacatgcaagtctaggggaaattccgg----cttcggttggaagagtacactggcgcacgggtgagtaatatgtaagaacctacccataggttcgggataactcgtcgaaagacgggctaataccgaatgatgcagcgttgttaaag------------ctatatggtgcctatggatgggcttgcatccgattagctagttggtagggtaacggcctaccaaggcgacgatcggtagctggtctgagaggatgatcagccacactggaactgagacacggtccagactcctacgggaggcagcagtgaggaatattgggcaatgcccgcaagggtgacccagcaacg…
>non-CPR_non-CPR_Bacteroidetes_NC_013501
actacggagagtttgatcctggctcagggcgaacgctggcggcgggcctaacacatgcaagtcgtacgcggggttctc----ctt-cgggagaactgccgagtggcgaacgggtgcgtaacgcgtaggaacctgccctcgagtgggggataactccgggaaaccggggctaataccgcatattgtcccgggatgaaag------------cctctgggcgctcgaggatgggcctgcgtcggattagctagttggtggggtaacggcccaccaaggcgacgatccgtagctggtctgagaggacgaccagccacactggcactgagacacgggccagactcctacgggaggcagcagtggggaatcttgggcaatgggcgaaagcctgacccagccacg…
>non-CPR_non-CPR_Bacteroidetes_NC_020510
acaacggagagtttgatcctggctcaggatgaacgctagcggcgggcttaacacatgcaagtcgaggggcagcataaaatc-----aggttttgatggcgaccggcgtacgggtgcgtaacacgtacgaacctaccttttgctagaaaatagcctgaggaaacttagattaatattctatagcataatattattaaag--------------cagatgtggcaaaagatgggcgtgcgtccgattagttagttggtaaggtaaaagcttaccaaggcaatgatcggtagggggcctgagagggcgatcccccacactggtactgagacacggaccagactcctacgggaggcagcagtgaggaatattggtcaatggaggaaactctgaaccagccacg…
>non-CPR_non-CPR_Bacteroidetes_NZ_CP011071
acgatgaagagtttgatcctggctcaggatgaacgctagcggcaggcctaacacatgcaagtcgaggggtaacagggaga------cttttccgctgacgaccggcgcacgggtgcggaacgcgtatgaacctgcccctgtcaggggaatagcccggggaaacccggattaatgccccatggcatcccgggattaaag--------------atttatcggacagggatggccatgcgtaccattagcttgttggtggggtaacggcccaccaaggcagcgatggttaggggccctgagagggggatcccccacactggtactgagacacggaccagactcctacgggaggcagcagtgaggaatattggacaatggccggaaggttgatccagccatg…
>non-CPR_non-CPR_Bacteroidetes_NC_018721
acgatgaagagtttgatcctggctcaggatgaacgctagcggcaggcttaacacatgcaagtcgaggggtaacattgtagc-----tgctacagatgacgaccggcgcacgggtgcgtaacgcgtataaatctacctattactaagagatagcccagagaaatttggattaatattttatagtattatctaattaaag--------------att--acggtaatagatgagtatgcgtcctattagcttgatggtaaggtaacggcttaccatggctacgataggtaggggtcctgagagggagatcccccacactggtactgagacacggaccagactcctacgggaggcagcagtgaggaatattggacaatgggagcaatcctgatccagccatg…
>non-CPR_non-CPR_Bacteroidetes_NC_015321
acaacggagagtttgatcctggctcaggatgaacgctagcggcaggcctaacacatgcaagtcgaggggtagcaggataa------ctttattgctgacgaccggcgcacgggtgcgtaacgcgtatgaacctaccttatactggggtatagcccggagaaattcggattaatcccccatagtattatttaattaaag--------------gtt--acggtataagatgggcatgcgtcccattagctagatggtgaggtaacggctcaccatggcgacgatgggtagggggcctgagagggtggtcccccacactggtactgagacacggaccagactcctacgggaggcagcagtgaggaatattggtcaatgggcgcaagcctgaaccagccatg…
>non-CPR_non-CPR_Bacteroidetes_NZ_CP018786
acaatggagagtttgatcctggctcaggatgaacgctagcgggaggcctaacacatgcaagccgagcggtagagattc--------ttcggaatcttgagagcggcgtacgggtgcggaacacgtgtgaacctgcctttatcagggggatagcctttcgaaaggaagattaataccccataatatatt-tattgaaaa--------------ctccggtggatagagatgggcacgcgcaagattagatagttggtgaggtaacggctcaccaagtctacgatctttagggggcctgagagggtgatcccccacactggtactgagacacggaccagactcctacgggaggcagcagtgaggaatattggacaatgggtgagagcctgatccagccatc…
>non-CPR_non-CPR_Bacteroidetes_NZ_CP012074
acaatggagagtttgatcctggctcaggatgaacgctagctacaggcttaacacatgcaagtcgaggggaaacggcgaag------ctcttcggacgtcgaccggcgcacgggtgagtaacgcgtatcaaccttcccatgaccgggggataacctgccgaaaggcagactaataccccatggccttcacgaagtaaag--------------attcatcggtcatggatggggatgcgtctgattagcttgttggcggggtaacggcccaccaaggctacgatcagtaggggttctgagaggaaggtcccccacattggaactgagacacggtccaaactcctacgggaggcagcagtgaggaatattggtcaatgggcgcaagcctgaaccagccaag…
>non-CPR_non-CPR_Bacteroidetes_NC_015164
acaatgaagagtttgatcctggctcaggatgaacgctagctacaggcttaacacatgcaagtcgcggggcagcgggggtc------taggcttgccggcgaccggcgcacgggtgagtaacgcgtatcgaccttccgcacactccgggccagccttccgaaaggaagattaatcccggatggtatggcgccattaaag------------gagcgatccggtgtgcgatgggggtgcgttccattagcttgttggcggggtaacggcccaccaaggcgacgatggataggggttctgagaggaaggccccccacattgggactgagacacggcccaaactcctacgggaggcagcagtgaggaatattggtcaatgggcgagagcctgaaccagccaag…
>non-CPR_non-CPR_Bacteroidetes_NC_016610
acaacggagagtttgatcctggctcaggatgaacgctagcgataggcttaacacatgcaagtcgaggggcatcgagggta------gcaacctgtcggcgaccggcgcacgggtgagtaacgcgtatgaacctgcccgcaacagagggataacccggcgaaagtcggactaatacctcataaaacagggttgttaaag--------------atttattggttgcggatgggcatgcgtaccattaggtagttggtgaggtaacggctcaccaagccatcgatggttaggggttctgagaggaaggtcccccacactggtactgagacacggaccagactcctacgggaggcagcagtgaggaatattggtcaatgggcgagagcctgaaccagccaag…
>non-CPR_non-CPR_Bacteroidetes_NZ_CP007451
acaacggagagtttgatcctggctcaggatgaacgctagcgggaggcctaacacatgcaagtcgaggggcagcattactt------tcgggtagatggcgaccggcgcacgggtgcgtaacgcgtatgaaccttccttgtacagagggatagcccatggaaacgtggattaatatctcatagtatcacatgattaaag--------------tttcggcggtacaagatgggcatgcgtaagattagctagttggtgaggtaacagctcaccaaggcaacgatctttaggggttctgagaggattatcccccacactggtactgagacacggaccagactcctacgggaggcagcagtgaggaatattggtcaatgggcgcaagcctgaaccagccatc…
>non-CPR_non-CPR_Bacteroidetes_NZ_CP013118
acaacgaagagtttgatcctggctcaggatgaacgctagcggcaggcttaacacatgcaagtcgaggggtaacaggttcct-----cgggaatgctgacgaccggcgcacgggtgagtaacgcgtatgaaccttcctgtatcaggaggataggccttggaaacgaggattaatactgcgtaaaattatttaatcaaat--------------ctacggaggatacagatgggcatgcgtgccattagctagatggtaaggtaacggcttaccatggccatgatggctaggggttctgcaaggaagatcccccacactggtactgagacacggaccagactcctacgggaggcagcagtgaggaatattggtcaatggaggcaactctgaaccagccaag…
>non-CPR_non-CPR_Bacteroidetes_NC_018011
acaatggagagtttgatcctggctcaggatgaacgctagcggcaggcttaacacatgcaagtcgaggggcagcgggga--------atactccgccggcgaccggcgcacgggtgcgtaacgcgtatgaacctacctttaacaggggcataacactgagaaattggtactaattccccataacatt-cgggttaaaaa--------------ctccggtggttaaagatgggcatgcgttgtattagctagttggtgaggtaacggctcaccaaggcaacgatacatagggggactgagaggttaaccccccacattggtactgagacacggaccaaactcctacgggaggcagcagtgaggaatattggtcaatggacgcaagtctgaaccagccatg…
>non-CPR_non-CPR_Bacteroidetes_NC_013132
acaatggagagtttgatcctggctcaggatgaacgctagcggcaggcctaatacatgcaagtcgaggggcagcgcaggta------gcaactgggcggcgaccggcaaacgggtgcggaacacgtacgaaccttcctctaaatggagcatagcccgaagaaattcggattaatactccataagattgtgcaattaaag--------------aatt-tcgtttagagatgggcgtgcggctgattaggtagttggtgaggtaacggctcaccaagccgacgatcagtaactggcgtgagagcgcgaccagtcacacgggcactgagacacgggcccgactcctacgggaggcagcagtaaggaatattggtcaatggacgcaagtctgaaccagccatg…
>non-CPR_non-CPR_Bacteroidetes_NC_016940
----tggagagtttgatcctggctcaggatgaacgctagcggcaggcttaatacatgcaagtcgaacggtaacaggtcct------tcgggatgctgacgagtggcgcacgggtgagtaacgcgtacaaatctgccttcatcagggggaaagtcactggaaacggtgaataatcccgcatacaactcttgagtaaaag--------------ctccggcggatgaagatgagtgtgcgtctgattagctagatgg
>non-CPR_non-CPR_Bacteroidetes_NC_015510
----tggagagtttgatcctggctcaggatgaacgctagcgggaggcttaatacatgcaagtcgagcggcaaggtcttc------------ggaccctagagcggcgcacgggtgagtaacgcgtacgaatctgcccttcagtgaggaatagccctgggaaactgggattaatacctcataatattgttcaattaaag--------------ttctggcgctgaaggatgagcgtgcgtctgattagcttgttgg
>non-CPR_non-CPR_Bacteroidetes_NC_018018
acaacggagagtttgatcctggctcaggatgaacgctagcggtaggcttaatacatgcaagtcgtacgggatttaagact------tcggttttaatgagagtggcgcacgggtgcgtaacacgtatgaacctaccttgtagagagggatagcccgaagaaatttggattaatacctcgtagtcttatataagtaaag------------gagcaatttgctacaagatggacatgcgcatgattagattgttggtgaggtaacggctcaccaagtccttgatcattaggggttctgagaggaaggtcccccacactggcactgagatacgggccagactcctacgggaggcagcagtagggaatattggacaatggaggcaactctgatccagccata…
>non-CPR_non-CPR_Bacteroidetes_NZ_CP020105
acgatggagagtttgatcctggctcaggatgaacgctagcggcaggcctaatacatgcaagtcgaacggtc--------------------cgcaaggacagtggcaaacgggtgcgtaacgcgtaagaacctgccccataccgggggatagcctggcgaaagccggggtaaacccgcatagtccctttcgggtaaac--------------atttatgggtatgggaggggcttgcgtctgattagttagttggcggggtaacggcccaccaagacagtgatcagtaggggttctgagaggattggcccccacatgggtactgagatacggacccaactcctacgggaggcagcagtagggaatattgggcaatggaggcaactctgacccagccatg…
>non-CPR_non-CPR_Bacteroidetes_NC_017770
-----ggagagtttgatcctggctcaggatgaacgctagcggcaggcctaatacatgcaagtcgaacgagattagagact------tcggtttctatgaaagtggcgcacgggtgcgtaacacgtatgaacctaccttcaattgggggatagccttccgaaagggagattaataccgcataagatatcaatattaaaa--------------ctttggtgattgaagatgggcatgcgttgcattagctagttgg
>non-CPR_non-CPR_Bacteroidetes_NZ_CP014766
----tggagagtttgatcctggctcaggatgaacgctagcggcaggcctaatacatgcaagtcgaacggatcaggttctt------tcgggaacctggttagtggcgcacgggtgcgtaacgcgtatgaacctaccttccacagggggatagccccgggaaaccgggattaataccgcatgacaccatgtggtcaaag--------------tttcggcggtggaagatgggcatgcgtgccattagctagttgg
>non-CPR_non-CPR_Bacteroidetes_NC_015914
acaatggagagtttgatcctggctcaggatgaacgctagcggcaggcctaatacatgcaagtcgtacgggatttcatctt------tcgggatgaatgagagtggcgcacgggtgcgtaacgcgtatgaacctacctgttacagggagatagcccggggaaactcggattaatattccatagtatataaatattaaag--------------ccttggtggtaacagatgggcatgcgtaggattagctagttggcgaggtaacggctcaccaaggcgacgatccttaggggttctgagaggaaggtcccccacactggcactgagatacgggccagactcctacgggaggcagcagtagggaatattggtcaatgggcgagagcctgaaccagccatg…
>non-CPR_non-CPR_Bacteroidetes_NC_008255
acaatggagagtttgatcctggctcaggatgaacgctagcggcaggcctaatacatgcaagtcgaggggcagcggggtag------caatactgccggcgaccggcgcacgggtgcgtaacacgtatgaacctaccttaaactgggagatagcccggggaaactcggattaataccccataacacatttttgttaaag--------------atttatcggtttaagatgggcatgcgttcgattagctagttggtgaggtaatggctcaccaaggctacgatcgatagggggtctgagaggatgatcccccacactggtactgagatacggaccagactcctacgggaggcagcagtagggaatattggtcaatggaggcaactctgaaccagccatg…
>non-CPR_non-CPR_Bacteroidetes_NC_013037
acaatggagagtttgatcctggctcaggatgaacgctagcggcaggcttaatacatgcaaggcgaaggggc--------------------agcaatgtcactgtcgtacgggtgcgtaacgcgtatgaacctacctatcactgggggatagcccggggaaacccggattaataccgcataaaacagggttgttaaag--------------atttattggtgatagatgggcatgcgttcgattagctagttggcggggtaacggcccaccaaggcgacgatcgataggggagctgagaggttgatcccccacacgggcactgagatacgggcccgactcctacgggaggcagcagtagggaatattgggcaatggatgcaagtctgacccagccatg…
>non-CPR_non-CPR_Bacteroidetes_NC_014655
acaatggagagtttgatcctggctcaggatgaacgctagcggcaggcttaatacatgcaagtcgagggggc--------------------agcaatgtcaccggcgaacgggtgcgtaacgcgtatgaacctacccatatcagggggatagccctaggaaactgggattaataccgcataacatag-atattaaaag--------------atttatcggatatggatgggcatgcgtaggattagctagttggtagggtaacggcttaccaaggctatgatccttaggggctctgagaggagtatcccccacactggcactgagatacgggccagactcctacgggaggcagcagtagggaatattgggcaatggaggcaactctgacccagccatg…
>non-CPR_non-CPR_Bacteroidetes_NC_018605
agaaagaagagtttgatcctggctcaggatgaacgctagcggcaggcctcatacatgcaagtcgaggggcagcgaaacact-----cggtgttgtcggcgaccggcgaacgggtgcgtaatgcgcatgaatctactttacactggggaatagcctccggaaacgggaattaataccccatataatcttaagataaaag--------------ctccggcggtgtaaaatgagcgtgcgtcctattagctagttggtgaggcaatggctcaccaaggctacgatgggtaggggttcttagtggaagatcccccacactggcactgagatacgggccagactcctacgggaggcagcagtagggaatattggtcaatgggcgcaagcctgaaccagccatg…
>non-CPR_non-CPR_Chlorobi_NC_010803
-caacggagagtttgatcctggctcaggacgaacgctggcggcgtgcctaacacatgcaagtcaaagggaagcgactt-----------ggtcgtgagtacttggcgcaagggtgagtaacgtataggaatctgccctttggactgggataacctcgagaaatcgaggacaataccagatgatgcagcgttgttaaag--------------atttatcgccaaaggatgagcctatattccatcaggtagttgg
>non-CPR_non-CPR_Elusimicrobia_NC_020419
----tggagagtttgatcctggctcagagtgaacgctagcggcgtgcctaacacatgcaagttgtgcgggattctgcaga------gtatcgcagagtttagcggcaaacgggtgagtaacacgtaggaacctccctcagaatggggaatatttccgagaaatcggagccaataccgcataagaccacatggttaaag------------cagcaatgcgttttgagatggtcctgcgtcctatcagctagttgg
>non-CPR_non-CPR_Elusimicrobia_NC_010644
----cggagagtttgatcctggctcagagttaacgctggcatcgtgcataacacatgcaagtcgaacgggaatttttt--------acatgaaaaattctagtggcagacgggtgagtaatacataagaatctaccttgaagtggggaacaactagtcgaaagattagctaatactccataatatcacttgattaaag--------------atttatcgcttcaagacgatcttatggtctatcagctagttgg
>non-CPR_non-CPR_Planctomycetes_NZ_CP017641
tttttgaagggtttgatcctggctcagaatgaacgttggcggcgtggattaggcatgcaagtcgagcgagaatttgtg--------agtgatcaaaggaaagcggcaaacggcgtagtaatgcgtagatacatgccctcgggttgggaatagccacgggaaactgtgggtaatgcccaataatctctgcggagcaaaggtg-----------tgattccgcccgaggagtggtttacgtgatattagcttgttggtggggtaatggcctaccaaggcgacgatgtctagggggtgtgagagcatggcccccacgaccggaactgagacactgtccggacacctacgggtggctgcagtcgagaatcttccgcaatgggcgaaagcctgacggagcgacg…
>non-CPR_non-CPR_Planctomycetes_NC_015174
aaacgcaagggtttgatcctggctcagaatgaacgttggcggcatggattaggcatgcaagtcgagcgagaagctctc--------ttcggagagtggacagcggcaaacggggtagtaaggcgtcgatatgaaccctcaggtctggaatagccattggaaacgatgggtaatgccggataatccctccggggtaaag--------------gtccgccgcctgaggaccggtcgacgtgatactaggtagttggtgaggtaatggctcaccaagcctacgatgtctagggggtgtgagagcatggcccccaccactgggactgagacactgcccagacacctacgggtggctgcagtcgagaatctttggcaatgggcgaaagcctgaccaagcgatg…
>non-CPR_non-CPR_Planctomycetes_NC_014148
------aagggtttgatcctggctcagaatgaacgttggcggcatggattaggcatgcaagtcgagggagaa--------------cccgcaagggggacaccggcgaacggggtaggaatacataggaacgtaccctcaggacggggatagccaagggaaactttgggtaatacccgatgtgatgtcaccatcaaaggtg-----------agattccacctgaggagcggcttatgcatcattagcttgttgg
>non-CPR_non-CPR_Planctomycetes_NC_013720
caattgaagagtttgatcctggctcagaatgaacgttggcggcatggattaggcatgcaagtcgtgcgcgata-------------agcaatacatggagagcggcgaaagggagagtaatacgtaggaacctaccttcgggtctgggatagcggcgggaaactgccggtaataccagatgatgtttccgaaccaaaggtg-----------tgattccgcctgaagaggggcctacgtcgtattagctagttggtagggtaatggcctaccaaggcaaagatgcgtatggggtgtgagagcatgcccccactcactgggactgagacactgcccagacacctacgggtggctgcagtcgagaatcttcggcaatgggcgaaagcctgaccgagcgatg…
>non-CPR_non-CPR_Planctomycetes_NC_005027
-----------------cctggctcagaatgaacgttggcggcatggattaggcatgcaagtcgcacgagaagctgagtag-----gctacaaagcggacagtggcgaaagggagagtaacgtgtggttacgtgccctcgagaccgggatagcgtcgggaaactggcagtaataccggataatatctacggatcaaaggtg-----------agattccgctcgaggattggaccgcatactattagcttgttgg
>non-CPR_non-CPR_Planctomycetes_NC_014962
-tctcgaagggtttgatcctggctcagaatgaacgttggcggcgtggattaggcatgcaagtcgaacgggcc--------------------gcaaggccagtggcgaaagggtgagtaaggcgacggaacctaccccgaggttgggcatagccgggggaaactccgggtaattcccagcgatgtgcgtgcaccaaaggtg-----------caattccgcctcgggacgggccgtcgtggtattaggtagttgg
>non-CPR_non-CPR_Planctomycetes_NC_017080
aaactgaagagtttgatcctggctcagatcgaacgctggcggcatggctaaaacatgcaagtcgaacgagaagccact-----------cggtggcggacagtggcgaaagggcgagtaacgtgtatcaatgtacccccgagtcctggatagcagtgggaaaccgctggtaacacaggatgacatcggtcgatcaaag----------------tttacgctcggggagcaggatacatcctatcagcttgttggtgaggtaacggcttaccaaggcgaagacgggtagcgggtgtgagagcatgacccgccgcatcgggactgagacactgcccggactcctacgggaggctgcagtaacgaatattccgcaatgcgcgaaagcgtgacggagcaatg…
>non-CPR_non-CPR_Chlamydiae_NC_002620
ttttctgagaatttgatcttggttcagattgaacgctggcggcgtggatgaggcatgcaagtcgaacggaacaattgc--------ttcggtgattgtttagtggcggaagggttagtaatgcatagaaatttgtccttaacttgggaataacggttggaaacggccgctaataccgaatgtggcgtagacgttaaagaaggg---cttcggacctttcggttaagggagagtctatgtgatatcagctagttggtggggtaaaggcctaccaaggctatgacgtctaggcggattgagagattggccgccaacactgggactgagacactgcccagactcctacgggaggctgcagtcgagaatctttcgcaatggacggaagtctgacgaagcgacg…
>non-CPR_non-CPR_Kiritimatiellaeota_NZ_CP010904
tttattgagagtttgatcctggctcagaacgaacgctggcggcgtggattaggcatgcaagtcgagcgggatcgtcaggctccttcaaacctgacgtgagagcggcgaacgggtgagtaacgcttgaaaacctgcccttcagtccggaatagcccaccgaaaggtggattaatgccggatgtgttcctctgtgtaaagacggg----atttatcctgtcgctgaaggatgggttcgagtcctatcagcttgttggtgaggtaacggctcaccaaggcgatgacgggtagccggcctgagagggtgatcggccacactgggactgagacactgcccagactcctacgggaggctgcagtcgagaatcattcgcaatgcgcgaaagcgtgacgatgcgacg…
>non-CPR_non-CPR_Verrucomicrobia_NZ_LM997411
-ttacggagagtttgattctggctcagagcgaacgctggcggcgtggataagacatgcaagtcgaacgaagcttgttcctt-----caaggaacaagttcagtggcgaacgggtgagtaacacgtgggaacttaccctgaagtggggaatagcccatcgaaagatggggtaattccgcatgtgatcgaacctgcaaag--------------gccttacgcttcaggagaggcccgcggcccatcagctagttgg
>non-CPR_non-CPR_Verrucomicrobia_NC_010571
-tttcggagagtttgatcctggctcagaatgaacgctggcggcgtggttaagacatgcaagtcgaacggtttttccggtgt-----tacatcggaaagacagtggcgaacgggtgcgtaacacgtgaaaatctacctccaaatggggaatagctcggcgaaagccggattaataccgcatgtggttgctataccaaagtcggg---cgcaaggcctgacgttaggagaggagttcgcggcctatcagctagttgg
>non-CPR_non-CPR_Verrucomicrobia_NC_014008
--ttcggagagtttgatcctggctcagagtgaacgctggcggcgtggttaagacatgcaagtcgaacgggattgtttaagt-----ttcttaaacatgagagtggcaaacgggtgcgtaacacgtaagaacctgccctaaagtttgggatagctcgaggaaactcgaattaataccggatgtggctcgggagctaaag----------cttgagatggcgctttaggaggggcttgcggcctatcagcttgttgg
>non-CPR_non-CPR_Verrucomicrobia_NC_010655
---atggagagtttgattctggctcagaacgaacgctggcggcgtggataagacatgcaagtcgaacgagagaattgcctt-----gctaataattctctagtggcgcacgggtgagtaacacgtgagaacctgcccccgagagcgggatagccctgggaaactgggattaataccgcatagtatcgaaagattaaag------------cagcaatgcgcttggggatgggctcgcggcctattagttagttgg
>non-CPR_non-CPR_Acidobacteria_NC_016024
caaactgagagtttgatcctggctcagaatcaacgctggcggcatgcctaacacatgcaagtcgaacgagaaagtcct-----------gggatgagtacagtggcgcacgggtgagtaacgcgtgggtatctacctctgggtggggaataactcggggaaactcgggctaataccgcataatacgttt-cgttaaag------------cagcaatgcgcctggagatgagcctgcgtccgattagctagttggcggggtaatggcccaccaaggcgacgatcggtagccggcctgagagggcggtcggccacactggcactgaaacacgggccagactcctacgggaggcagcagtgaggaattttgggcaatgggcgcaagcctgacccagcaatg…
>non-CPR_non-CPR_Acidobacteria_NC_018014
------gagagtttgatcctggctcagaatcaacgctggcggcgtgcctaacacatgcaagtcgcacgagaaagggac--------tcggtcctgagtaaagtggcgcacgggtgagtaacacgtgacaatctacctccgagtggggaataactgagggaaaccttagctaataccgcataacacttac-agtcaaag------------cagcaatgcgcttggagaggaggtcgcggcagattagctagttgg
>non-CPR_non-CPR_Nitrospirae_NC_017094
aatctggagagtttgatcctggctcagaacgaacgctggcggcgtgcctaacacatgcaagtccaacgtgaaagggga--------caatcccccggtagggtggcaaacgggtgagtaagacatggggatctaccttagggatggggatatccttccgaaaggaggggcaataccgaatattgtccggggggaaagggaggc---gatacaagctttcgccttaagatgagcccatggcccatcagctagttggtagggtaaaggcctaccaaggctacgacgggtcgctggtctgagaggacgaccagccacactggcactgagatacgggccagactcctacgggaggcagcagtgaggaatattgcgcaatgggggaaaccctgacgcagcaacg…
>non-CPR_non-CPR_Nitrospirae_NC_014355
------gagagtttgatcctggctcagaacgaacgctggcggcgcgcctaatacatgcaagtcgagcgagaaggtgta--------caatacacttgtaaagcggcgaacgggtgaggaatacatgggaatctaccatcgagtggggaataaccagccgaaaggttggctaataccgcgtacgcctccggagggaaagccaca---------gtgcggcgctctttgatgagctcatgtcctatcagcttgttgg
>non-CPR_non-CPR_Nitrospirae_NC_011296
-------agagtttgatcctggctcagagcgaacgctggcggcgtgcctaacacatgcaagtcgagcggaccagaaatgga-----ctttatttctggttagcggcgaacgggtgagtaacacgtgggaacctgccctcaggaggaggataactcggggaaacctgagctaatactccataagaccacgtggtaaaag------------aagcaattcacctgaggatgggcccgcggcctatcaggtagttgg
>non-CPR_non-CPR_Thermodesulfobacteria_NC_015682
tttcctgagggtttgatcctggctcagggcgaacgctagcggcgcgcctaacccatgcaagtcgtgcgggaaaggggg--------ttttccccaagtaccgcggcaaacgggtgagtaacacgtgagaacctgtcctcgggtctgggataaccacccgaaagggtggctaataccggataaagtcacttgatgaaagggggc---atagcaagctcccgcctgaggaggggctcgcggcccatcagctagttggtggggtaacggcccaccaaggctaagacgggtagccggcctgagagggtggtcggccacacgggcactgagacacgggcccgactcctacgggaggcagcaggggggaatcttgggcaatgggcgcaagcctgacccagcgacg…
>non-CPR_non-CPR_Chrysiogenetes_NC_014836
tatacggagagtttgatcctggctcaggacgaacgctggcggcgtgcctaacacatgcaagtcaaggggc-------------------ctttcggggccactggcgcacgggtgagtaacacgtgggaatctgccctttggcccgggataacatctggaaacggatgctaataccggataatctcttt-gagcaaaggagct-------tcgggttccgccgaaggatgagcccgcgcatgattagcttgttggtggggtaacggcccaccaaggcgaagatcattagccggcctgagagggtgaacggccacactgggactgagacacggcccagactcctacgggaggcagcagtggggaatattgcgcaatggacgtaagtctgacgcagcaacg…
>non-CPR_non-CPR_Deferribacteres_NC_014758
---atggagagtttgatcctggctcagaacgaacgctggcggcacgcttaacacatgcaagtcaaggggaaagggctt-----------ggcctgagtacactggcgcacgggtgagtaacgcgtgagaatctgcccataagactgggataacacaccgaaaggtgtgctaatactggatgtgttccatggagtaaaggcggg------gtaacctgtcgcttatggatgacctcgcgtccgattagctagttgg
>non-CPR_non-CPR_Deferribacteres_NC_013943
---atggagagtttgatcctggctcagaacgaacgctggcggcgtgcttaacacatgcaagtcaaggggaaagtcact--------tcggtggcgattacactggcgcacgggtgagtaacgcgtgagaatctaccattaagtttgggacaacattccgaaaggggtgctaataccggataatatacacgtaggaaaggcggt-------tcggctgtcgctttttgatgatctcgcgtatcattagatagttgg
>non-CPR_non-CPR_Spirochaetes_NC_018887
------------------------------------------tgcatctaaataatgcaagtcaagcgg--atgtgat-------------agtgcatttagttactaacggagtagtaattaataggaatctacttgttggataggaataattact-aaaatagcagctaataccaaagtatattagt----gata---------cctttgaagtttcgcttgtagttgagtttatgtcttgttggttgg--gg
>non-CPR_non-CPR_Spirochaetes_NC_015385
ggcatggagagttcgatcctggctcagaacgaacgctggcggcgcgtcttaagcatgcaagtcgggcgggattcacgc--------ttgcgcgtggtgagagcggcggactggcgagtaacacgtggggacgcgccctccggacgggaatagcctgcagaaatgcagggtaatgccggatgcgaacacacgtggaaag--------cccccacgggggcgccggaggagcggcccgcggcccatcagctggtaggcggtgcaagggaccacctaggctacgacgggtacccggcctcagagggcggacgggcgcattgggactgagatacggcccagactcctacgggaggcagcagctaagaatattccgcaatggggggaaccctgacggagcgacg…
>non-CPR_non-CPR_Spirochaetes_NC_015436
---acggagagtttgatcctggctcagaacgaacgctggcggcgcgttttaagcatgcaagtcgagcgggaaggggct-----------cggccctggagagcggcggacgggtgagtaacacgtggagatctgcctcccagttggggacagcacctggaaacaggtgataataccggatacgaccgcacggggaaaggggc--------cacggccccgctgggagatgagtccgcggcccattagctggatgg
>non-CPR_non-CPR_Spirochaetes_NC_023035
atcatggagagtttgatcctggctcagaacgaacgctggcggcgcgttttaagcatgcaagtcgaacggtaacagggt--------tcggaccgctgacgagtggcggacgggtgagtaacacgtagggatctgccttttggttggggatagcccatggaaacatggggtaataccgaataagttctcgagaggaaaggggc--------ttcggcctcgccgaaagatgagcctgcgctagattagctagttggtagggtaaaggcctaccaaggcgacgatctatagccggcctgagagggtgatcggccacactgggactgagatacggcccagactcctacgggaggcagcagctaagaatcttccgcaatggacgaaagtctgacggagcgacg…
>non-CPR_non-CPR_Spirochaetes_NC_017583
atgatggagagtttgatcctggctcagaacgaacgctggcggcgcgtcttaggcatgcaagtcgagcggtagggtggt--------ttgcaccacctgagagcggcggacgggtgagtaacacgtagggacctatcctcaggttggggatagcccgtggaaacacggggtaataccggatggcctcttaggaggaaaggcccg-------ataagggtcgcctgaggaggggcctgcggcccattagctagttggtagggtaacggcctaccaaggcgacgatgggtagggggtctgagaggatggccccccacactgggactgagacacggcccagactcctacgggaggcagcagccaagaatcttccgcaatgggcgaaagcctgacggagcgacg…
>non-CPR_non-CPR_Spirochaetes_NC_022097
ataatggagagtttgatcctggctcagaacgaacgctggcggcgcgtcttaagcatgcaagtcgaacggcaaggtaagagc-----tgctcttaccctagagtggcggactggtgagtaacgcgtagggacctgccctgaagatggggatagctagtagaaatattagataataccgaatgtgcttatataaggaaaggagc--------tacggctccgctttaggatgggcctgcgtcccattagcttgttggtgaggtaacggcccaccaaggcgacgatgggtatccggcctgagagggtgaacggacacattgggactgagatacggcccaaactcctacgggaggcagcagctaagaatcttccgcaatggacgaaagtctgacggagcgacg…
>non-CPR_non-CPR_Spirochaetes_NZ_CP009117
ataacgaagagtttgatcctggcttagaactaacgctggcagtgcgtcttaagcatgcaagtcaaacgggat--------------gtagtaatacatctagtggcgaacgggtgagtaacgcgtggagatctacctatgagatggggataactactagaaatagtggctaataccgaataaggtcaatgaaaggaag--------cctttaaagcttcgcttgtagatgagtctgcgtcttattagttagttggtggggtaaatgcctaccaaggcgatgataagtaaccggcctgagagggtgaacggtcacactggaactgagatacggtccagactcctacgggaggcagcagctaagaatcttccgcaatgggcgaaagcctgacggagcgaca…
>non-CPR_non-CPR_Spirochaetes_NC_018020
---atggagagtttgattctggctcagaacgaacgctggcggcgcgtcttaaacatgcaagtcgaacgatct--------------gtagcaatacagggagtggcggacgggtgaggaacacgtaggaatctacctcgaagagcgggacaactttgggaaaccggggctaataccgcatagtacagagatgttaaaggg--------tagcaatagtcgcttcgagatgagcctgcggtctatcagcttgttgg
>non-CPR_non-CPR_Spirochaetes_NC_010602
--cacggagagtttgatcctggctcagaactaacgctggcggcgcgtcttaaacatgcaagtcaaacgggt--------------------agcaataccagtggcgaacgggtgagtaatacatggaaacctacctagaagttggggataacacagagaaatttgtgctaataccgaatgtgacggtttggttaaag------------cagcaatgcgcttttagatgggtccatggctgattagctagttgg
>non-CPR_non-CPR_Spirochaetes_NZ_CP015910
agtatggagagtttgattctggctcagagcgaacgttggcgatgcgtcttaagcatgcaagtcgagcgggcttattcg--------caactggataagttagcggcgaactggtgagtaacacgtaggaatctgccgtagagtgggggataacccatggaaacatggactaataccgcatatactcttgagaggaaagga------------gca-tccgctttacgatgagcctgcggcctattagcctgttggtggggtaacggcctaccaaagctacgataggtagccgacctgagagggtgaccggccacattgggactgagatacggcccagactcctacgggaggcagcagctgagaatcttccacaatggacgaaagtctgatggagcgaca…
>non-CPR_non-CPR_Proteobacteria_NC_009715
aatatggagagtttgatcctggctcagagtgaacgctggcggcgtgcctaatacatgcaagtcgaacggagattaagt---gcttg---tatttaatcttagtggcgcacgggtgagtaatgtatagcaatctgccccatagtggaggacaacagttggaaacgactgctaatactccatactccatttatgggaaagtagccgaccatagggtttctcgctatgggatgaggctatatcgtatcagctagttggtagggtaatggcttaccaaggctatgacgcgtaactggtctgagaggatgatcagtcacactggaactgagacacggtccagactcctacgggaggcagcagtagggaatattgctcaatgggggaaaccctgaagcagcaacg…
>non-CPR_non-CPR_Proteobacteria_NZ_CP020867
tttatggagagtttgatcctggctcagagtgaacgctggcggcgtgcctaatacatgcaagtcgaacgatgaagcttc---gctt-gctagaagtggattagtggcgcacgggtgagtaaggtatagtaatctgccctacactagggaataacacttagaaatgagtgctaataccctatactcctatttagggaaa---------------gtttttcggtgtaggatgaggctatatagtatcagctagttggtggggtaaaggcttaccaaggctatgacgcttaactggtctgagaggatgatcagtcacactggaactgagacacggtccagactcctacgggaggcagcagtagggaatattgcgcaatgggcgaaagcctgacgcagcaacg…
>non-CPR_non-CPR_Proteobacteria_NZ_CP019645
cttatggagagtttgatcctggctcagagtgaacgctggcggcgtgcctaatacatgcaagtcgaacgatgaagcttc---gctt-gctagaagtggattagtggcgcacgggtgagtaatgcataggtatgtgccctttagtctgggatagccactggaaacggtgattaatactggatactccctac-ggggaaaggggctaatattgaaagccttcgctaaaggatcagcctatgtcctatcagcttgttggtgaggtaatggctcaccaaggctatgacgggtatccggcctgagagggtgatcggacacactggaactgagacacggtccagactcctacgggaggcagcagtagggaatattgctcaatgggggaaaccctgaagcagcaacg…
>non-CPR_non-CPR_Proteobacteria_NC_014506
attatggagagtttgatcctggctcagaatgaacgctggcggcgtgcttaacacatgcaagtcgaacggtaacagagagaagcttgcttctttgctgacgagtggcgcacgggtgagtaatatatagaaatgtgcctcttagtctgggatagccattggaaacgatgattaatactggatactccttcttcgggaaa---------------gtttttcgctaagagatcggtctatatcccatcagcttgttggtagtgtaagagactaccaaggcaatgacgggtagcgggtttgagaggatgatccgccacactggtactgagacacggaccagactcctacgggaggcagcagtgaggaatattgcacaatgggggaaaccctgatgcagcaacg…
>non-CPR_non-CPR_Proteobacteria_NC_015318
--acatgagagtttgatcctggctcagaacgaacgctggcggcgtgcctaacacatgcaagtcgtgggagaaagtctc----ctt-cgggagacgagtaaaccggcgcacgggtgagtaacacgtgggaacctgccctgaagtccgggataacccaccgaaaggtgggctaataccggatagttcccctgggggaaaggtggc---cttgcaagctatcgcttcaggatgggcccgcggcctatcaggtagttgg
>non-CPR_non-CPR_Proteobacteria_NZ_CP007051
---actgagagtttgatcctggctcagaatgaacgctggcggcgtgcctaacacatgcaagtcgtacgcgaaagaagg--------caaccttcgagtaaagtggcgcacgggtgagtaacacgtggaaacctgccccaaagtctgggataacgtgccgaaaggtgcgctaataccggatacctttgtgtaaagaaaggaggc---cttgcaagctttcgctttgggatgggtccgcggcctatcaggtagttgg
>non-CPR_non-CPR_Proteobacteria_NC_009943
taattggagagtttgatcctggctcagattgaacgctggcggcgtgcttaacacatgcaagtcgtacgagaaagtttc---gctt-gctgaaacaagtaaagtggcgcacgggtgagtaacgcgtgggaatctgcccctgggttcgggataacccgccgaaaggcgagctaataccggataacatctttagatcaaaggtagc---catgtaagcttctgccgagggatgagcccgcgtaccattagtttgttggtggggtaacggctcaccaagacgttgatggttagctggtctgagaggatgatcagccacactggaactgagacacggtccagactcctacgggaggcagcagtgaggaattttgcgcaatgggggaaaccctgacgcagcaacg…
>non-CPR_non-CPR_Proteobacteria_NZ_CP010311
aaactggagagtttgatcctggctcagaacgaacgctggcggcgtgcctaacacatgcaagtcgaacgagaaagggga----ctt-cggtccctgagtacagtggcgcacgggtgagtaacacgtgggaatctgcccggagattcgggacaacatctcgaaaggggtgctaataccggataagcctacgcaggaaaaggtggg---ttcggaacctaccgtccccggatgagcccgcggcccattagctagttggcggggtaatggcccaccaaggcgacgatgggtagctggtctgagaggatgatcagccacactggaactgagacacggtccagactcctacgggaggcagcagtggggaattttgcgcaatgggcgaaagcctgacgcagcaacg…
>non-CPR_non-CPR_Proteobacteria_NC_008554
aaactggagagtttgatcctggctcagaataaacgctggcggcgtgcctaacacatgcaagtcgaacgagaaagccttaatcttc-ggatgggcgagtaaagtggcgcacgggtgagtaacgcgtaggaacctacccccgggaccgggataacagtgcgaaagtgctgctaataccggatacgattgtgacgatgaaagtcgg---cagagaagccgatgttcggggatgggcctgcgtcctatcagctggttggtagggtaacggcctaccaaggcgacgacgggtagctggtctgagaggatgatcagccacactggcactggaacacgggccagactcctacgggaggcagcagtgaggaattttgcgcaatggccgcaaggctgacgcagcaacg…
>non-CPR_non-CPR_Proteobacteria_NC_006138
aaactggagagtttgatcctggctcagaacgaacgctggcggcgtgcttaacacatgcaagtcgaacgcgaacggttt----ctt-cggaaacctagtagagtggcgcacgggtgagtaacgcgtaagaatctaccctgatatctgggataacaattcgaaaggattgctaataccggatacgttgat-tcaagaaagatggc---catgaaagctattgtatcgggaggagcttgcgtaccattagctagttggtggggtaatggcctaccaaggcgacgatggttagcgggtctgagaggatgatccgccacactggaactgaaacacggaccagactcctacgggaggcagcagtgaggaatattgcgcaatgggggaaaccctgacgcagcgacg…
>non-CPR_non-CPR_Proteobacteria_NZ_CP012159
taactggagagtttgatcctggctcagaacgaacgttagcggcgcgcttaacacatgcaagtcgagcgagaaagggct-----------ggccccggtaaagcggcgcacgggtgagtaacacgtaggaatctacctcccagtggtggataacgttccgaaaggaacgctaatacagcataagaccacgaggtcaaagcgggc---catgtaagctcgcgctgggagatgagcctgcggcccatcagctagttggtagggtaatggcctaccaaggcgaagacgggtagctggtctgagaggatgatcagccacactggaactgagacacggtccagactcctacgggaggcagcagtggggaatcttgcgcaatgggcgaaagcctgacgcagcgacg…
>non-CPR_non-CPR_Proteobacteria_NC_015711
caattggagagtttgatcctggctcagaacgaacgctggcggcgtgcctaacacatgcaagtcgagcgcgaatagggg-----------acccttagtagagcggcgcacgggtgcgtaacacgtggaaatctgcctgagtgctcgggataaccagtcgaaagattggctaataccggataagcccacgagggaaaaggtggc---tatacaagctatcacattcagatgagtccgcggcccatcagctagttggcggggtaatggcccaccaaggcgacgacgggtagctggtctgagaggacgatcagccacactggaactgagacacggtccagactcctacgggaggcagcagtggggaattttgcgcaatgggcgaaagcctgacgcagcaacg…
>non-CPR_non-CPR_Proteobacteria_NC_016803
-aactggagagtttgatcctggctcagattgaacgctggcggcgtgcttaacacatgcaagtcgagcgagaaagctct----ctt-cggagagtgagtagagcggcgcacgggtgagtaacgcgtggaaatctgccctgaagatcgggataacagctggaaacgactgctaataccgtataatctgcatgtgggaaaggtggc---tttataagctaccgcttttggatgagtccgcgtctcattagcttgttgg
>non-CPR_non-CPR_Proteobacteria_NC_016620
---ttggagagtttgatcctggctcagaacgaacgctgtcggcatgcctaacacatgcaagtcgtacgagaaagcacc--------tcgggtgtgagtagagtggcgcacgggtgagtaacgcgtagggatctaccatttggcgggggataaccaggagaaattctggctaataccgcatacgtactgcagtagaaagaatgc---cttggaagcatttaccaaatgatgagcctgcgtagcattagtttgatgg
>non-CPR_non-CPR_Proteobacteria_NC_012115
ttaatggagagtttgatcctggctcagagtgaacgctggcggcatgcttaacacatgcaagtcgaggggcagcaggcgggaacttcttcccgtgctggcgaccggcggacgggtgagtaacacgtagctacttgccccacagagggggataacacaccgaaaggtgtgctaataccgcatacacccgag-ggggaaag--------------tcggtccgctgtgggatagggctgcggcgtatcagctagttggtgaggtaacggcttaccaaggcgatgacgcgtagctggtctgagaggatgatcagccacactggaactgagacacggtccagactcctacgggaggcagcagtggggaatattgggcaatgggggaaaccctgacccagcaatg…
>non-CPR_non-CPR_Proteobacteria_NC_008576
----tggagagtttgatcctggctcagaacgaacgttggtggcatgcttaacacatgcaagtcgaacggtagcaggcc--------tcggggtgctgacgagtggcgcacgggtgagtaacgcgtggagacctacccagatgtgggggacaacagttggaaacgactgctaataccgcataatccctaagggggaaag--------------gcttgccgcatttggaggggtccgcgttggattaggtagttgg
>non-CPR_non-CPR_Proteobacteria_NC_005363
aaactggagagtttgattctggctcagaacaaacgctggcggcgtgcctaatacatgcaagtcgaacggggaaagctt-----------gggtgagtactagtggcgcacgggtgaggaacgcgtggaaatctgccttagagtgggggataactagtcgaaagattagctaataccgcataagaccacagggtcaaag--------------gtttttcgctctaagatgagtccgcgtaagattagctagttggtgaggtaacggctcaccaaggcgacgatctttaactggtctgagaggatgatcagtcacactggaactgagacacggtccagactcctacgggaggcagcagtagggaatattgcacaatggaggaaactctgatgcagcgacg…
>non-CPR_non-CPR_Proteobacteria_NC_017059
taacttgagagtttgatcctggctcaggacgaacgctggcggcaggcctaacacatgcaagtcgaacgcatcc------------------ttcgggatgagtggcgcacgggtgagtaacacgtgggaacgtaccttggagtacggaataatccttggaaacgaggactaataccgtatacgcccttcgggggaaag---------------aatttcgctccaagatcggcccgcgtccgattagctagttggcggggtaatggcccaccaaggcgacgatcggtagctggtctgagaggatgatcagccacactgggactgagacacggcccagactcctacgggaggcagcagtggggaatattgcgcaatgggggaaaccctgacgcagccatg…
>non-CPR_non-CPR_Proteobacteria_NC_015593
aaacttgagagtttgatcctggctcagaacgaacgctggcggcatgcctaatacatgcaagtcgaacgatcac------------------ttcggtggtagtggcgcacgggtgcgtaacgcgtgggaatctgcccttgggttcggaataacgtctggaaacggacgctaataccggatgacgtcgatagaccaaag--------------atttatcgcccagggatgagcccgcgtaggattagctagttggtggggtaaaggcccaccaaggcgacgatccttagctggtctgagaggatgatcagccacactgggactgagacacggcccagactcctacgggaggcagcagtagggaatattggacaatgggggcaaccctgatccagcaatg…
>non-CPR_non-CPR_Proteobacteria_NC_023135
caacttgagagtttgatcctggctcagaacgaacgctggcggcaggcctaacacatgcaagtcgagcgct----------------ctccttcgggagggagcggcggacgggttagtaacgcgtgggaacgtgcccttctctaaggaatagccactggaaacggtgagtaataccttatacgcccttcgggggaaag--------------atttatcggagaaggatcggcccgcgttagattagatagttggtggggtaacggcctaccaagtctacgatctatagctggttttagaggatgatcagcaacactgggactgagacacggcccagactcctacgggaggcagcagtggggaatcttggacaatgggcgcaagcctgatccagccatg…
>non-CPR_non-CPR_Proteobacteria_NC_015186
gaacttgagagtttgatcctggctcagagcgaacgctggcggcatgcttaacacatgcaagtcgcacgggcag----------------ggcaacctgtcagtggcggacgggtgagtaacgcgtaggaatctatccttgggtgggggacaaccgtgggaaactacggctaataccgcatgatccctgaggggcaaaggcgaa------------agtcgcctgaggaggagcctgcgtctgattaggtagttggtggggtaaaggcctaccaagcctgcgatcagtagctggtctgagaggatgatcagccacactgggactgagacacggcccagactcctacgggaggcagcagtggggaatattggacaatgggcgaaagcctgatccagcaatg…
>non-CPR_non-CPR_Proteobacteria_NC_006142
aaacttgagagtttgatcctggctcagaacgaacgctatcggtatgcttaacacatgcaagtcgaacggattaattag---gct--tgctctagttaattagtggcagacgggtgagtaacacgtgggaatctacccatcagtacggaataacttttagaaataaaagctaataccgtatattctctacggaggaaag--------------atttatcgctgatggatgggcccgcgtcagattaggtagttggtgtggtaatggctcaccaagccgacgatctgtagctggtctgagaggatgatcagccacactgggactgagacacggcccagactcctacgggaggcagcagtggggaatattggacaatgggcgaaagcctgatccagcaata…
>non-CPR_non-CPR_Proteobacteria_NC_013532
aaacttgagagtttgatcctggctcagaacgaacgctggcggcaagcttaacacatgcaagtcgaacggaccatacgc---gcttgctgcgtgtatggttagtggcagacgggtgagtaatgcataggaatctacctagtagtataggatagccactagaaatggtgggtaatactgtataatccctgcgggggaaag--------------atttatcgctattagatgagcctatgtcagattagctagttggtggggtaatggcctaccaaggcggtgatctgtagctggtctgagaggatgatcagccacactggaactgagacacggtccagactcctacgggaggcagcagtggggaatattggacaatgggcgcaagcctgatccagctatg…
>non-CPR_non-CPR_Proteobacteria_NC_007798
tgatttgagagtttgatcctggctcagaacgaacgctagcggtaggcttaacacatgcaagtcgaacggaatcaaagc---gct--tgcagccttggtcccgtggcagacgggtgcgtaacgcgtgggaacttgcctggtagtagggaataaccagtggaaacattgggcaacaccctatacgccctgagggggaaa---------------atttattgctatcagataggcccgcgttagattagctagttggtggggtaatggcctaccaaggcgacgatctatagctggtctgagaggatgatcagccacactggaactgagacacggtccagactcctacgggaggcagcagtgaggaatattggacaatgggcgaaagcctgatccagccata…
>non-CPR_non-CPR_Proteobacteria_NC_000913
aaattgaagagtttgatcatggctcagattgaacgctggcggcaggcctaacacatgcaagtcgaacggtaacaggaagaagcttgcttctttgctgacgagtggcggacgggtgagtaatgtctgggaaactgcctgatggagggggataactactggaaacggtagctaataccgcataacgtcgcaagaccaaagagggggaccttcgggcctcttgccatcggatgtgcccagatgggattagctagtaggtggggtaacggctcacctaggcgacgatccctagctggtctgagaggatgaccagccacactggaactgagacacggtccagactcctacgggaggcagcagtggggaatattgcacaatgggcgcaagcctgatgcagccatg…
>non-CPR_non-CPR_Proteobacteria_NC_006370
taattgaagagtttgatcatggctcagattgaacgctggcggcaggcctaacacatgcaagtcgagcggtaacaggaattagcttgctaatttgctgacgagcggcggacgggtgagtaatgcctgggaatatgccttagtgtgggggataactattggaaacgatagctaataccgcataacgtccttggaccaaagagggggaccttcgggcctctcgcgctaagattagcccaggtgggattagctagttggtgaggtaaaggctcaccaaggcaacgatccctagctggtctgagaggatgatcagccacactggaactgagacacggtccagactcctacgggaggcagcagtggggaatattgcacaatgggggaaaccctgatgcagccatg…
>non-CPR_non-CPR_Proteobacteria_NZ_CP013920
taattgaagagtttgatcatggctcagattgaacgctggcggcaagcctaacacatgcaagtcgagcggcaacgttaaaagacttttttttttgacggcgagcggcggacgggtgagtaaagtatggggatctgcccggaggagagggataaccattggaaacgatggctaataccgcataatctctaaggagcaaagtgggggactaaatagcctcataccttcggatgaacccatatgagattagctagtaggtagggtaagggcctacctaggcaacgatctctagctggtctgagaggatggtcagccacactgggactgagacacggcccagactcctacgggaggcagcagtggggaatattgcacaatgggcgaaagcctgatgcagctatg…
>non-CPR_non-CPR_Proteobacteria_NZ_CP008849
taattgaagagtttgatcatggctcagattgaacgctggcggcaggcctaacacatgcaagtcgaacggtaacatttctag-----gctagaagatgacgagtggcggacgggtgagtaatgcttgggaacttgcctttgcgagggggataacagttggaaacgactgctaataccgcataatgtctacggaccaaacggggc-------taggctccggcgcaaagagaggcccaagtgagattagctagttggtaaggtaatggcttaccaaggcaacgatctctagctgttctgagaggaagatcagccacactggaactgagacacggtccagactcctacgggaggcagcagtggggaatattgcacaatgggggaaaccctgatgcagccatg…
>non-CPR_non-CPR_Proteobacteria_NZ_CP015615
aaactgaagagtttgatcatggctcagattgaacgctggcggcaggcttaacacatgcaagtcgagcgggggaggtta--------tcggtaactgacctagcggcggacgggtgagtaatgcttaggaatctgcctattagtgggggacaacattccgaaaggaatgctaataccgcatacgtcctacgggggaaagcaggggatcttcggaccttgcgctaatagatgagcctaagtcggattagctagttggtggggtaaaggcctaccaaggcgacgatctgtagcgggtctgagaggatgatccgccacactgggactgagacacggcccagactcctacgggaggcagcagtggggaatattggacaatgggcgcaagcctgatccagccatg…
>non-CPR_non-CPR_Proteobacteria_NZ_AP014633
aaactgaagagtttgatcatggctcagattgaacgctggcggcatgcctaatacatgcaagtcgaacggtaacatgcc--------tcggggtgatgacgagtggcggacgggtgagtaatacataggaatctgccttgtagtggggaacaacttggggaaactcaagctaataccgcataagtcttttaagggaaagagggc---catgaatgctctcgctactagatgagcctatgtcagattagctagttggtaaggtaatggcttaccaaggcgacgatctgtagctggtctgagaggacgatcagccacactgggactgagacacggcccagactcctacgggaggcagcagtagggaatattggacaatgggcgaaagcctgatccagcaatg…
>non-CPR_non-CPR_Proteobacteria_NZ_CP011849
aaactgaagagtttgatcctggctcagattgaacgctggtggcatgcttaacacatgcaagtcgaacggtagcagatctag-----gctagatgctgacgagtggcggacgggtgagtaacgcgtgggaatttaccttttagtgggggataactttaggaaactgaagctaataccgcataagacctgagggttaaagagggc---tttataagctcttgctaggagatgagcccgcgttggattagctagttggtagggtaaaggcttaccaaggcgacgatccatagctggtttgagagaatggccagccacactgggactgagacacggcccagactcctacgggaggcagcagtggggaatattggacaatggggggaaccctgatccagcaatg…
>non-CPR_non-CPR_Proteobacteria_NZ_CP007541
aaattgaagagtttgattctggctcagattgaacgctagcggcatgcctaacacatgcaagtcgaacgggacagcgcggagacttgtctctagcgagttgagtggcgaacgggtgagtaatgcgtaggaatctaccttttagagggggataacccgaggaaactcgggctaataccgcgtagtatctctggaagaaagcgggggatttaaggacctcgcgctaaaagatgagcctgcgtcggattagttagttggtggggtaatagcccaccaagacgatgatccgtagctggtctgagaggatgatcagccacactgggactgagacacggcccagactcctatgggaggcagcagtggggaatattggacaatgggggaaaccctgatccagcaatg…
>non-CPR_non-CPR_Proteobacteria_NC_009465
gaactgaagagtttgatcctggctcagattgaacgctggcggtatgcttaacacatgcaagtcgaacggaaacgatactag-----gctagtaggtgtcgagtggcggacgggtgagtaacgcgtaggaatctgcttgatagtgggggatagcccggagaaatccggattaataccgcataatcttgataaagtaaagaaggcggttatatatgctttcgctatcaaatgagcctgcgtaagattagctagttggtgaggtaaaagctcaccaaggtgacgatctttagctggtctgagaggatgatcagccacactggaactgagacacggtccagactcctacgggaggcagcagtggggaatattggacaatgggcgcaagcctgatccagcaata…
>non-CPR_non-CPR_Proteobacteria_NC_003902
taagtgaagagtttgatcctggctcagagtgaacgctggcggcaggcctaacacatgcaagtcgaacggcagcacagtaaggctt-tcttatgggtggcgagtggcggacgggtgaggaatacatcggaatctactctttcgtgggggataacgtagggaaacttacgctaataccgcatacgacctacgggtgaaagcggaggaccttcgggcttcgcgcgattgaatgagccgatgtcggattagctagttggcggggtaaaggcccaccaaggcgacgatccgtagctggtctgagaggatgatcagccacactggaactgagacacggtccagactcctacgggaggcagcagtggggaatattggacaatgggcgcaagcctgatccagccatg…
>non-CPR_non-CPR_Proteobacteria_NC_009446
gaactgaagagtttgattctggctcagattgaacgctggcggcatgcttaacacatgcaagtcgaacggggttatgta--------ttgctatgtaacctagtggcggacgggtgagtaatatataggaatctgccttatggtgggggacaacgtatggaaacgtacgctaataccgcataagattgaagaatgaaagcgggggctcgaaagacctcgcgccgtaagatgagcctatatcggattagctagttggtggggtaagagcctaccaaggcgacgatccgtagctggtttgagagaatgatcagccacatcgggactgagacacggcccgaactcctacgggaggcagcagtggggaatattggacaatggggggaaccctgatccagcaatg…
>non-CPR_non-CPR_Proteobacteria_NZ_CP005986
gaacgcgagagtttgatcctggctcagattgaacgctggcggcatgcctaacacatgcaagtcggacggcagcaggtc--------tcgggatgctggcgagtggcggacgggtgagtaatgcgtaggaacctatccttttgtgggggacaacccagggaaacttgggctaataccgcataagccctgagggggaaagcgggggatcttcggacctcgtgctgaaggaggggcctacgtccgattagctagttggtggggtaaaggcctaccaaggcgacgatcggtagctggtctgagaggacgaccagccacactgggactgagacacggcccagactcctacgggaggcagcagtggggaatttttcgcaatgggggcaaccctgacgaagcaatg…
>non-CPR_non-CPR_Proteobacteria_NC_006570
----tgaagagtttgatcctggctcagattgaacgctggtggcatgcttaacacatgcaagtcgaacggtaacaggtc--------ttaggatgctgacgagtggcggacgggtgagtaacgcgtaggaatctgcccatttgagggggataccagttggaaacgactgttaataccgcataatatctgtggattaaaggtgg----ctttcgggctgtcgcagatggatgagcctgcgttggattagctagttgg
>non-CPR_non-CPR_Proteobacteria_NC_015422
gaactgtagagtttgatcctggctcagattgaacgctggcggcatgccttacacatgcaagtcgaacggtaacaggtc--------ttcggatgctgacgagtggcgaacgggtgagtaatacatcggaacgtgcccgatcgtgggggataacgaagcgaaagctttgctaataccgcatacgatctacggatgaaagcgggggatcttcggacctcgcgcggacggagcggccgatggcagattaggtagttggtgggataaaagcttaccaagccgacgatctgtagctggtctgagaggatgatcagccacactgggactgagacacggcccagactcctacgggaggcagcagtggggaattttggacaatgggcgcaagcctgatccagccatg…
>non-CPR_non-CPR_Proteobacteria_NZ_CP007726
gaacataagagtttgatcctggctcagattgaacgctggcggcatgctttacacatgcaagtcggacggcagcggggt---gcttgcactactgccggcgagtggcgaacgggtgagtaatatattggaacgtaccgagtaatgggggataaccaatcgaaagattggctaataccgcatacgctctgaggaggaaagcaggggaccttcgggccttgcgttattcgagcggccaatatctgattagctagttggtggggtaaaggcctaccaaggcgacgatcagtagcgggtctgagaggatgatccgccacactgggactgagacacggcccagactcctacgggaggcagcagtggggaattttggacaatgggcgcaagcctgatccagccatg…

## Sheet: 23S rRNA
>CPR_others_Dojkabacteria_GCA_000991805.1
ataaagc-aaataagagcatacggtgaatgccttggcgtagaagaccgatgaaggacgtagtaggctgcgataagcctcgggtagctgtcaaacggctatg-atccggggatttccgaatggggtaacctggctggatttaaccagtcgccttacagtaaatacatag--tataggtgggcacgcggagaagtgaaacctctcagtatccgcaggaaaaaagaacaag-gttattcccttagtagtggcgagcgaaaagggaggagtctaaactcta--cata-tttcattttaataaaaacatctggaaaggtgtgccatagaaagtgaaagccttgtatatgaaaagatgatctcttctaacttcttaagtaccacgaggcacgcgagatcttgtgg…
>CPR_others_CPR3_GCA_000990575.1
----agattattaagagcacataatggatgccttgcttttgaaagccgaagaaggacgtactaggctgcgataagtctcgggaaggcgccaagaggttatt-atccgggaatttccgaatggggcaacccttctacct-gat-agaa-actcctatctgaatctataggaagagagaggtaagtcagcgaactgaaacatctaagtaactggagtaaaataaatcaa-agagattccgtaagtagtggcgagcga
>CPR_others_CPR1_GCA_000998265.1
aatagga--agtaagggcgtatggtggatgccttggcacaaaaaggcgatgaaggacgtggcgagctgcgataagtcacgg---------------------acctctcagtaaccagaggaaaagaaaacatgt-gt-tac-----tgtttta------------------ttaaagctaattttcaaatgcaaatttgatttttggttttgataaaataagtaga--ggcattcccttagtagcggcgagcgaaaagggaagagctcaaacc-aa--agaaa-aatttgttagtcaaatactctggaaagagcaaccaaagaaggtgatagtcctgtaggcgaaaataaaccatctgtctttgtcttgagtaatgcggggaac-gacagccccgtat…
>CPR_WWE3_WWE3_GCA_001772655.1
----aagcaaacaaaggcagatgatggatgccttggaacagaaagcctatgaaggacgtatgagcctgcgataagcctcggtgagctggcaaaaagcgctt-aaccggggatctccgaatggggaaacccgtccgattttatcggaccacct--agccaaatatataa--ggttggagggcactcggcgaattgaaacatcttagtagccggaggaaaagaaatagac-ttgattccctaagtagcggcgagcga
>CPR_WWE3_WWE3_GCA_001873785.1
----aag-aa--aatggcatatggtggatgccttgggataagaagcctatgaaggacgcgctagactgcgataagcctcaaggaggtgtcaagaaccgttatacttggggatgtccgaatgggggaacccccgtcg-tgca-cgcgg-acgccg-----------tag--gcggcgtgggaactcggcgaactgaaacatcttagtagccggaggaaaagaaa-------caattcccttagtagtggcgagcga
>CPR_WWE3_WWE3_GCA_001772615.1
ctaaaaa--aattaaagcgtatggtggatgcctagggtctttgtgctgatgaaggacgtactaagctgcgttaagcttcggggagccgctaagaggttatt-acccggggatttccgaatggggaaacctgttcttggacaattgaacatccgcaaacgaagagatag--gtgtgaaaggcactctgcgaactgaaacatcttagtagcagatggaaaaaagacaaa--tgtatacccggagtagtggcgagcgaaacgggcggagcccaaacccta--caaa-attttctctagaagaacggtctggaaagtccggccaaagagcgttacagccgcgtatttgaaagggaactgtttgggttgttcctgagtatcacgggacacgtgaaatcctgtga…
>CPR_WWE3_WWE3_GCA_001772625.1
aacaaag-taacaaatgcatatggtggatgccttgggtctttatgccgatgaaggacgtgcttagctgcgttaagcttcggggagctgctgagaagctatt-acccggagatgtccgaatggggaaacccggccaggagcaacaggtcactcattgttgaaatcataga-atgtggagggaactcagcgaactgaaacaacttagtagctggaggaatagaaaccaaaaggtatttcctgagtagcggcgagcgaaagggaagaagtctaaacctaa--aaaattactttagtaggaaaacaagctggaaagctttgccatagagggtaatagccccgtattcgaaactggaacttcttgggttttccagagtagcatgggacacgtgaaaccctgtgt…
>CPR_WWE3_WWE3_GCA_001000765.1
atagaaagaacttaatgtacacggaggatgcctagggtttttgcggcgaagaaggacgcgccaggctgcgttaagctttggggagctgccaagaagttatc-acccagagatatccgaatggggaaaccttaccaatagaaataggt-acctcttgctgaaaatatagg-ttagggagcgtaccaggtgaactgaaccaacttagtaacctgaggaacagaaacaaat--gtatttcgttagtagcggcgagcgaaagcgaagaagcccaaactcca-acaag-cattttcataggggaactttctggaaagttaggccatagagagtaatagcctcgtacccgaaatgggacttcttgggttgttctagagtagcatgggacacgtgaaatcctgtgt…
>CPR_WWE3_WWE3_GCA_001772575.1
taaaaaagaaattaaggtatatggtggatgcctagggtctttgtaccgaaaaaggacgtgcaaggctgcgataagcctcgatgagccgccaaggggttatt-agtcggggatttccgaatggggaaacctggtccaaagcaatagatcactcactatcaaaactataa--gtgtagagggtaccctgcgaagtgaaacaactcagtagcaggaggaaaagaaactaaaaagtatttcctgagtagcggcgagcgaaaaggaaacagcccaaacccta--caaa-tttttatgtagaaaagccggctggaaagccgtaccacagagagtaatagtctcgtattcgaaacataactttttgggttggtcctgagtagcatgggacacgcaaaaccctgtgt…
>CPR_WWE3_WWE3_GCA_000503835.1
----aaa--aactaatgcatatggtggatgccttgggtattcgcgccgatgaaggaggtgctaagctgccataagcctcgaggagttgctacgaagttatt-actcggggacttccgaatggggaaacccaacccgctttaagaggttactaattactgaaaccatagg-atttagagggaactcggcgaactgaaacaacttagtagccggaggaaaagaaaccaaaaggtattctcctagtagcggcgagcga
>CPR_MG_Woykebacteria_GCA_001816835.1
----aaac---tacatgcatatggtggatgccttgggttgctttgcctaagaaggacgtagcaggcgacgaaactgaccgagtagctg-ccaacagcgtta-atccggtcatgtccgaatggggaaacccggccgcctttg--cggtcacc-agcagtgaat--atag--gcttggagggaacctggcgaactgaaacatctaagtaaccagtggaaaagaaatcaa--gagattccgttagtagaggcgatcga
>CPR_MG_Woykebacteria_GCA_001816655.1
----aggttgtttaaggcgtttggtggatgccttggctcttttagctgatgaaggacgtggtagtctgcgataagcttcggttagctg-gcaacagcgttt-acccggagatttccgaatggggcaacccgcctgatt-ta-tcaggcacccaccgcccaattcataag-gtgtggaaggaactccctgaactgaaacatctaagtaaggggaggaaaagaaagcaatagcgattctctaagtagcggcgagcga
>CPR_MG_Curtissbacteria_GCA_001775055.1
-------t-attttatgcgttcaatggatgcctaggtgcaacacaccgaagaaggacgtagagggctacgataagtaccggtgagctg-ccgtcagctttg-atccggtaatttccgaatggggaaacccgcttgggtaaat-gggttacccctaaacgaatgcataa--ctagagagggtaccgcctgaactgaaacatctaagtaaggcgaggaaaagaaaacaaa-gtgattccctaagtagtggcgagcga
>CPR_MG_Daviesbacteria_GCA_001776975.1
aata---caaataaaagcatacggcggatgccttggtcgaaagtaccgataaagggcgtacacggcaacgatatcctgtggggagctgccacgaagctatg-atccacagatgcccgaatggggaaacccgatct--t-tat-agatcacctcctgctgaaggcataa--ggaaggggggtacgcgctgaactgaaacatctaagtaagcgcaggaaaagaaagcaa-agcgattcccttagtagtggcgagcgaaaagggagcagtctaaaccata--ggatt-agaagaatagtagaatccactggaaagtggagccaaagagggtgatagccccgtaaacgaaattttaacccttagtggttcctcaagtagcccgggacacgtgtaatcccgggt…
>CPR_MG_Daviesbacteria_GCA_000996555.1
----aatcaaataaaggcatacggtggatgccttggtcgaaagtaccgatgaaggacgtactaggcgacgatactctgcggggagctgccaagaagctttg-atccgcaggtttccgaatgggataacccctcgcc-tgga-------accctaacataaattcatag--ttagggagggcacgcgctgaactgaaacatctaagtaagcgcaggaaaagaaatcaa--gagattcccttagtagcggcgagcga
>CPR_MG_Daviesbacteria_GCA_001776985.1
--------aaattaatgcatacggtgaatgccttggtcgaaagtaccgaagaaggacgtactaggctgcgatacgctctggggagctgccttgaagctttg-atccagagatctcctaatggggtaacccatcccgattta-cggat-atc-tacgctgaatacataa--ggatgaggggtacgcgctgaactgaaatatctaagtaagcgcaggaaaagaaaacaaa--ttattccctaagtagtgacgagcga
>CPR_MG_Daviesbacteria_GCA_001777435.1
----atacaaattaatgcatacggtggatgccttggtcgaaagtaccgatgaaggacgtaacagactgcgataagcttcggggagctgccaataagctttg-atccgaagatttccgaataagttaactagtcgcctttggc------atttcttactgaattcatag--aagagaagggtacgcgctgaactgaaacatctaattaagcgcaggaaaataaatcaa--gagattccccaagtagcggcgagcga
>CPR_MG_Levybacteria_GCA_001782015.1
----gcgtt-cataatgtcaatagtggatgcctaggaggtgttgaccgaagaaggacgtatcaagccgcgaaactcgccggggagccgcctatgagctata-atccggtggtgtccgaatgaggaaactcttccagctttgctggaa-accttgtcatgaaaatatag--acgggtggggaacctggtgaactgaaacatctcagtaaccggaggaaaataaatcaa--gagattcccttagtagcggcgagcga
>CPR_MG_Levybacteria_GCA_001873215.1
----attt-aat-aatgccaatagtggatgcctaggaagtgttgaccgaagaaggacgcatctgaccgcgaaactcaccgggaagtggtctaagaattttg-atccggtggtgtccgaatggggaaacccactccgctgca-cgagt-gccccgttccgagt--atag--aatggctgggaacctggggaactgaaacatctcagtacccggaggaaaagaaatcaa--gagattccgccagtagcggcgagcga
>CPR_MG_Levybacteria_GCA_001782675.1
----acgt-agc-cacgccattagtggatgcctaggaagtgttgaccgaagaaggacgttttaggcagcgaaaatcgtcggggagcagcccatgagctttg-atccggcggtgtccgaatggggaaacccatgccgatgcaatcggctaccttgccatgaagatatag--gcgggtagggaacccggtgaactgaaacatctaagtaaccggtggaaaagaaatcaa-agagattcccttagtagcggcgagtga
>CPR_MG_Levybacteria_GCA_001782075.1
----agtt-acataacgtcgacaatggatgcctgggagattttggccgaggaaggacgcatatggcggcgatactcgtcgggtaagtg-tcataacttttg-atccggcggtttccgaatggagcaatccctccgatttttccggag-acc-agtataaaaaatatag--tttggtggggcacgatgtgaactgaaacatctaagtaacatcaggaagataaatcaaa-gagattccctaagtagcggcgagcga
>CPR_MG_Levybacteria_GCA_001784125.1
----agat-acataatgccaataatggatgcctaggagattttggccgaggaaggacgcatatggcggcgatactcgtcgggtaggtg-ccataacctatt-atccggcggtttccgaatggagcaatccaccgcgtttta-ccggt-gcc-ctcataaaaaatatag--tttggcggggtacggcgtgaactgaaacatctaattaacgccaggaaaaaaaatcaa--gagattccccaagtagcggtgagcga
>CPR_MG_Roizmanbacteria_GCA_016700135.1
agatgggg-aaatcacgccaatggcggatgccttggcagtttgagccgaagaaggacgtgtatgagcgcgaaa-acatcgatgagtcctcaaacaacattc-aatcgatgatttccgaatggggaaaccctccgtgtagcaacatggaattttcgcag-------tac--cgttaatgggaacccggggaactgaaacatctaagtacccggaggaaaagacatcaa-cgagattccgttagtagcggcgagcgaacgcggaacagcctaaaccgtcc-gatgaagtatttatagaagaatgatctggaaagatcagccacagagggtgatagccccgtatttgacatgaattccggtagcagtatcccaagtaccacgggacacggcaaatcctgtgg…
>CPR_MG_Roizmanbacteria_GCA_016699265.1
agatggag-aattaacgccattggtggatgccttggcaatttgagacgaagaaggacgtgctcgagagcgata-acaacgatgagtccttaagcaacgctt-aatcgttggtttccgaatggagcaatccccttagtagtaactgaggatcctgtgat-------tat--gtaggaggacaacctggggaactgaaacatctaagtacccggaggaaaagaaaacaat-gtgattctgtcagtagcggcgagcgaaagcagagcagcctaaacca---ggagtaacaatcggtaaaaaaatgttctggaaagaacaaccaaagtgcgtgatagtcgcgtatttcaaactgaacctcgagcgaatctcccaagtactacgaggcacggcaaaccttgtag…
>CPR_MG_Roizmanbacteria_GCA_000997505.1
taatggaaatttaagggcgcacggtggatgccttgactctaataagcgatgaaggacgtagttagctgcgataagcttcggggaggtgcttagcacctttg-atccggagatttccgaatggggaaacccatccaactttgt-ggat-atcttgtacttg----------acaagttgcatacccagggaagtaaaacatttcagtacctggaggaatagaaaacaatcaacatttccctagtagcggcgagcgaaaaggaaacagcccaaacctta--caaaatattttgttaacagaa-ctgctgggaagcagaaccctagtgggtaatagtcccgtaagtgaaaacaaatttccgttattattcttgagtacctcaggacac-gaaaagcttgagg…
>CPR_MG_Roizmanbacteria_GCA_001790075.1
attggggt-acataaagcaaatggtggatgccctggcactagaagctgatgaaggacgtgctaaatcacgaaa-gcgtcggtgagacattatgcatcattc-aaccggcggtttcctaatgggaaaacccactctttcgaagcgagt-atcccg----------ataa--tcgggaggggaactcggggaactgaaacatctaagtacccgaaggaaaagagacctat-ggtattccgttagtagcggcgagcgaaaacggagaagcccaaaccc----atatttttttcaatatcagaacgttttggaatggacgaccatagagagtgaaagtctcgtaaggcaaattgagagtatgcggatgttccaaagtaccacgaagcac-ggcaactttgtgg…
>CPR_MG_Roizmanbacteria_GCA_001787945.1
----ggatt-gataacgttaatggtggatgccttggcaatttgagccgaagaaggacgtgtgtaagcacgata-tcgtcgatgagcccgtaagcagcattt-aatcggcggtttccgaatgggacaacccctttctgtgtaaagagagatcccccgcc-------tgg--ggaggaaggcaacccggtgaactgacacatcttagtaaccggaggaaaataaaacaa-agtgattccgtcagtagcggcgagcga
>CPR_MG_Roizmanbacteria_GCA_001788095.1
ggatattt-aattaaagctagtggtgaatgcctaggtaatttgagccgaggaaggacgtgtatggacacgata-tcgtcgataagtctcctaacaacattacaatcggcggtttcccaatgggataaccccactgatagtaatcagtgaccccc----------atat--cgggggaggatacctggtgaactgaaacatctcagtaaccggaggaaaagaaatcaaacgagattccgtcagtagcggcgagcgaaagcggaggagcctaaaccc---ctacactttttttctagatgaatgtcatggaaaggacaaccaaagaaagtgatagtcttgtagttaaaagaagatgtaagcggaatttcccaagtaccacgggacacggaaaaccttgtgg…
>CPR_MG_Roizmanbacteria_GCA_001788235.1
----gggttatgtaatgcttatggtggatgcctaggtaatttgagccgaagaaggacgtgcttaagcccgata-tcgtcgatgagcccttaagcagcactc-aatcggcggtttccgaatgggataaccctt-------ta-------acc-------------atag--tgctggggggaacctgatgaactgaaacatctaagtaatcagaggaagagaaatcaa-agagattctgtgagtagcggcgagcga
>CPR_MG_Roizmanbacteria_GCA_001789535.1
agacggag-atttaatgccattggcggatgccttggcagtttgagccgatgaaggacgtgattaagcacgaaa-acaacggtgagcccttaatcagcgtcc-agccgttggtttccgaatggagcaatcccgtcgggtgaaacaagttatcctgtctcaaacatatgggcacaggtggggaacccgatgaactgaaacatctaagtaatcggaggaaaagaaatcaa--gatattccggtagtagcggcgagcgaaaacggaaaagcctaaacca----ggagtgagcaggataggaaaatgttttggaaaaaacaaccacagaaagtgacagtcttgtatccaaaatctagaccctggtgggttacccaagtaccacgaggcacggcaaaccttgtgg…
>CPR_MG_Roizmanbacteria_GCA_001790155.1
gatgggaa-aaactaagttaatggtggatgccctggcagtttgaaccgaagaaagacgtgcttaagcacgata-tcaacgataagtcctttagcaacattc-aatcgttggtttctgaatggagcaatccgtttcgatgtaacgagatatcaaatacc-------tat--atttgaggggaacccggagaaccgaaacatccaagtatccggaggaaaagacatcaa-tgagattccgtcagtagcggcgagcgaacgcggaggagcctaaactt----gatgtatattttgtaggagaacagcatggaaaggctggtcatagagagtgagaacctcgtatctgaaacaaaaaccccggtgggtttcctaagtaccacgaggcacggcaaaccttgtgg…
>CPR_MG_Roizmanbacteria_GCA_001789805.1
gatgggaa-aaataaagccaatggaggatgccttggcagtttgagccgaagaaggacgtgtttaagcgcgaaa-acaacgatgagcccttcagcagcgttt-aatcgttggtttccgaatgggggaaccccttcttgagaaaaagga-gtc-----------acatgg--tacctgagggaacccagggaactgaaacatctcagtacctggtggaaaagaaatcaa-tgagattctgtaagtagcggcgagcgaaagcagatcagcctaaaccc---cggagtaattttgatagaaaaataccctggaaagggtagccatagaaagtgatagccttgtattccaaatcaaaaccctagtggatttcccaagtaccacgagtcacggcaaaccttgtgg…
>CPR_MG_Roizmanbacteria_GCA_001788055.1
agatgggg-aaataaagctaatggtggatgcctaggtaacttaagccgaagaaggacgtgaatgagcgcgata-acaacggtgagtcctctatcaacgatc-aaccgttggtttccgaatggggcaacccgatcctgcgtaaaggatgatactacgct-------cgc--gtagtaaggagacctaatgaactgaaacatctcagtaactagaggaaaagaaaacaa-agtgatttcgttagtagcggcgagcgaaagcgaaatagcccaaagtcca--ggatagttaagaatagaagaatatcttggaaaagatagccatagagggtgatagccctgtattctaaattcgatgcttgggtgggtacctaagtaccacgagtcacggcaaaccttgtgg…
>CPR_MG_Roizmanbacteria_GCA_000990725.1
gatgggaa-aattaaagctaatggcgaatgccttggcagtttaagccgaagaaggacgtgctaacgcccgaaa-acaacgatgagcccgtatgtagcgcca-aatcgttggtttccgaatggggcaaccccatcttgcgtaaaaggtgatcaggtaccgcat--------acccgagggtaagctggagaactgaaacatctcagtatccagaggaaaagaaaacaacagtgattgcgcaagtagcggcgagcgaaaacgcaatagtctaaaccctg--gaatcatcttgggtaaaaaaacgttctggaaaggacggccatagaaagtgatagccttgtattttaaacctaaagtcctattttgttcccaagtaccacgaggcacggcaaaccttgtgg…
>CPR_MG_Gottesmanbacteria_GCA_001779145.1
----aaat-atc-aaagccattggtggatgccttggcagagagaaccgaggaaggacgttgtaag-ggccgatatcgacgggttgctcctcaacagctt---atccgttggtttccgaatggagaaatccgccccgatttacggggc-atc---gcgtaaatacatag--cttgatcgggtaccccccgaactgaaacatctaagtagggggaggaaaataaaataa--atgattccccaagtagcggcgagcga
>CPR_MG_Gottesmanbacteria_GCA_001779195.1
----aatttacataaagtcgacaatggatgcctaggcagcaatgaccgaagaaggacgcttcttacggcgatatc-atcggtgaggctgtaaagacctttg-acccggtggtttccgaatggagcaatcctcccgacgcga-cggaa-gct-tacgtaaaacatatag--ataggtggggtaccatctgaactgaaacatctaagtaagatgaggaaaagaaatcaat-gagattccgtcagtagcggcgagcga
>CPR_MG_Gottesmanbacteria_GCA_001871285.1
----aaattacataaagtcgataatggatgcctaggcggttttgaccgaggaaggacgtgcatacctgcgataac-gtcggggaggcggttagcacctgcg-atccggcggtttccgaatggggaaacccactccgattta-cgagt-acc-taggcaaaatatatag--tatggtagggaaccatccgaactgaaacatctaagtaggatgtggaaaataaatcaaa-gagattccgtcagtagcggcgagcga
>CPR_MG_Gottesmanbacteria_GCA_001779315.1
----aaattacataaagtcgacaacggatgccttggcggttttggcctaggaaggacgttgtaaccaacgata-tcgtcggttaggcggttagcacctgcg-atccggcggtttccgaatggggtaaccctcccccgataatcggggtgttctgtccaaaagacatag--gttgtcagggcaccgggcgaactgaaacatctaagtagcccgaggaaaagaaatcaat-gagattccgtcagtagcggcgagcga
>CPR_MG_Gottesmanbacteria_GCA_001780985.1
--------aactaaaagccgataatgaatgccttgggcgttcgtgccgaggaaggacgtatatgaccacgatagtcgtcggggaggagccataatcccgcg-atccgacggtttccgaatggagcaatccatcccg-c-aa--atgttgtcccgggttgaaa---tag--tattactgggcaccacctgaactgaaacatctcagtagggtgaggaaaaaaaataaa--gagattccgtcagtagcggcgagcga
>CPR_MG_Shapirobacteria_GCA_000989305.1
agagaattttaataaagcaaatggtggatgcctaggtggttaaagccgatgaaggacgtagaagacagcgatatgcgtcggggagttg-tcaacaatgatg-atccgacgaattccgaatggagaaatccctgactatgaaacggag-atctcg----------agagattctgccgggagacccggggaagtgaaacatctcagtacccggaggaaaagaaatcga-agagattccgtaagtagcggtgagcgaaaacggaagagcctaaacctta--aagtttgaaaaaacagaagaaggttaaggaatgaacagccaaagagggtgaaagccccgtatttgaaatttgaaaactgattggatacctaagtaccgcgatccacgtgaaatgtcgcgg…
>CPR_MG_Amesbacteria_GCA_000402715.1
catcatattgccaaaagcagataatgaatgccttggatactagagccgaagaaggacgcgacaggccgcgatagtcatcggggagctg-ccaagagctttg-atccgatggtctccgaatggggaaacccactccgatgaaacggaggaccccg----------gtatg-gcagggagggaacgcctcgaactgaaacatctaagtaggggcaggaaaataaatcgg-ggagatttcgtaagtagcggcgagcgaaagcgaaacagtctaaacccta--ggattaatttggataggagaatggtttggaaagatcagccaaagaacgtgatagccgtgtaaacaaaattcaa--ccttagtttgtacccaagtaccatgagacacg---tatcttgtgg…
>CPR_MG_Amesbacteria_GCA_000997915.1
----gtataagaataagcagataatggatgccttggacgtatagaccgaagaaggacgtacatgaccacgatagtcgctggggagctgtcaagaagctttg-atccggcggtgtccgaatggggaaaccctcccgattttat-ggga-atcccg-----------tag--gggagatgggaacgcctcgaactgaaacatctaagtaggggcaggaaaagaaatcaa--gagattccgtaagtagcggagagcga
>CPR_MG_Amesbacteria_GCA_001773615.1
----atattccgtaatgcagacaatggatgcctaggatgtcaaagccgaagaaggacgtacagggccgcgatagtcgtcggggagctg-ccaagagcgctg-atccggcggtttccgaatggggaaacccctcctatat----ggag-accc----------tcataa--acgtggggggaacgtctcgaactgaaacatctaagtagggactggaaaataaatcaa-agagattccgtgagtagcggtgagcga
>CPR_MG_Amesbacteria_GCA_001001005.1
-------tt-cgaaaagcagacaatggatgcctggaggatgtaagccgaagaaggacgtactaggccacgatagtcgtcggggagctg-ccaagagcgctg-atccggcggtgtccgaatggggaaacccaccccgcagaaacgggg-gtcccgtttggaat--atag--gcgggaggggcacgccctgaactgaaacatctaagtaggggcaggaaaataaatcaa--gagattccgtaagtagcggagagcga
>CPR_MG_Amesbacteria_GCA_001773645.1
-------tt-cgtaaagcaggcaatggatgcctagggcgctaaagccgaagaaggacgtacgtggccacgatagtcgtcggggagctg-ccaagagctgtg-atccgacggtgtccgaatggggaaacccctcctt-t-aa--ggag-actccg----------atat--tcggggggggcacgtcccgaactgaaacatctaagtagggacaggaaaagaaatcaa-agagattccgtaagtagcggtgagcga
>CPR_MG_Amesbacteria_GCA_001002325.1
-------tt-cgtaaggcagacaacgaatgcctaggatactgaagccgaagaaggacgtacgtggccacgaaagtcgtcggggagctg-ccaagagctttg-atccggcggtgtccgaatggggaaaccccctct--t-tat-gagg-accccg----------a-----gcggggggggcacgccctgaactgaaacatctaagtaagggcaggaaaagaaatcaacagagattccgtaagtagcggtgagcga
>CPR_MG_Woesebacteria_GCA_001029755.1
----ggtttaattaacgcagatagtggatgccttggtcgtatcttccgaagaaggacgtacatagccacgatagtcgacggggaactg-ctacgagttttg-atccgtcggtgtccgaatggagcaatccttcctgatttatcagga-actttaagccaaatgaataa--acaatgagggaaccatctgaactgaaacatctaagtaagatgaggaaaagaaatcaa-agagattgcgtcagtagcggcgagcga
>CPR_MG_Woesebacteria_GCA_016700095.1
tttaagtttacttaacgcagacagtggatgccttggtctagattaccgaagaaggacgtgcaagactgcgaaaagcgtcggtgagttg-tcaagaacattacagccggcgatgtccgaatggggaaacccgcactgcttcac-agtg-actctgctccaaggctataa--gcgtagagggaaccgcccgaactgaaacatctaagtagggcgaggaagagaaatcaa-cgagattgcctaagtagcggcgagcgaaacggcaagagcccaaag-ttg--gtagtttttttgatagcagaatgacatggaatagtcagccatagaacgtgatagacgtgtatgcgaaatcaaaacgcctagcggtatcccgagtacgacgatgcat---ctacatcgtcg…
>CPR_MG_Woesebacteria_GCA_013426185.1
aaaaaggct-actcacgcaattggtggatgcctaggtgcaagttgccgaagaaggacgcgtaagaccgcgaaagtcgtcggggagctg-tcaaaagctgtg-atccgtcggtgtccgaatggggaaaccttgtcgcctttgg-cgac-accctgccctaagactataa--acgtggagggaaccgtctgaactgaaacatctaagtaaggcgtggaagagaaaacaa-agtgattccgttagtagcggagagcgaaagcggaagagcccaaaccctg--agaatttgttaggtagcagaacagtctggaatgtctggccatagaaagtgaaagccttgtatgcgaaacttggttctctagggatttcctgagtaccacggtgcaa---atacactgtgg…
>CPR_MG_Woesebacteria_GCA_013374855.1
----aggct-actcacgcaaatggtggatgcctaggtacaggttgccgaagaaggacgcgtaaggccgcgaaagtcgtcggggagccg-ccaaaagctgtg-atccgtcggtgtccgaatggggaaacccatactgctttat-agtatactccaccccaagtctataa--gtgtagagggaaccgtctgaactgaaacatctaagtaaggcgaggaagagaaaacaa-agtgattccgtcagtagcggagagcga
>CPR_MG_Woesebacteria_GCA_013374835.1
cgaaagtt-acacaacgcagacagtggatgccttggcatcaaccaccgatgaaggacgcacatggcggcgatactcgccgggtaggag-ccacgacctgtg-atccggcggtttccgaatggggaaacccactccgatttatcggagtactctgtcataagtatatag--tgaagtggggtaccacctgaactgaaacatctaagtaaggtgaggaaaagaaattaaa-aagattgcccaagtagcggcgagcgaaaaggcaaaagcccaaaccttg--gtagctttggggatagtggaacaatctggaatggttggccatagaaagtgaaagtcttgtacacgaaatccttgcgcctatgggtatcctgagtaatccgatc----gacaacttcggat…
>CPR_MG_Woesebacteria_GCA_001793185.1
gctaaatt-aattaacgcagacagcggataccctggccttttcaaccgatgaaggacgcacaaggctgcgatacgcgccggctagctgccaagaaatttta-agccgacgatttccgaatggggaaacccgttcccgtttgcgggatcagtccacaccaagtatataa--tgtggcagggaaccactcgaactgaaacatcttagtagggtgaggaaaagaaattaa-aaagattgccttagtagcggagagcgaaacggcaaaagcccaaatcctg--ggagttaataagctagtagaacaatctggaatggttgaccatagagagtgaaagtctcgtacacgaaagcaatacccctaaggaattcctgagtaccacggtg---taaatactctgtgg…
>CPR_MG_Woesebacteria_GCA_001793475.1
aataagtt-act-aacgacaacagtggatgccttggtctttccaaccgagaaaggacgcgcatggcggcgaaactcgtcggggagctg-tcacgagctttg-atccggcgatatccgaatggggcaacccaccttaattcgttaggt-attttatcccaagtttataa--tataaaggggaacctggggaactgaaacatctaagtacccagaggaatataaatcaat-gagattccgtaagtagcggcgagcgaaatcggaacagcctaaaccgtg--gtagttattgcggtagcaaaaaactctggaatgagttgccatagaaagtgaaagccttgtatgcgaaaccaaaacacctagggatttcctaagtaatacggtc----gacaactccgtgt…
>CPR_MG_Woesebacteria_GCA_000999115.1
cgaaagtctacttaatgcaaacagtggatgcctaggcataagttgctgatgaaggacgcgtaaggctgcgataagcgccggggagctg-ccacaagctttg-atccgacgatttccaaatgggagaacccagtcccgcttt-gggactatttcaccccaagtatataa--tgtagaaaggtacctgaggaactgaaacatctaagtactcagtggaaaataaatcaa-agagattgccttagtagcggcgagcgaaacggcaagagcccaaatcctg--ggagtttgaagggtagtagaaattgctggaatgcaataccaaagaaagtaatagtcttgtacacaaaaccctgacccctagaggtatcctgagtaccacggtcgac----atctccgtgg…
>CPR_MG_Woesebacteria_GCA_001793235.1
----agcttaaaaaatgcaaacagtggataccttggcctttgttacctatgaaggacgtacatggccgcgaaagtcgtcggggagctg-ccacgagctttg-atccggcggtgtccgaatggggaaacctggcccagttcattgggccacactgtggtaaaaatatag--caggcgagggaaccatccgaactgaaacatctaagtagggtgaggaagagaaatcaa--gagattgcctaagtagcggcgagcga
>CPR_MG_Woesebacteria_GCA_001791895.1
aaaaagttt-gctaacgcagacagtggatgcctaggtataagttgccgaagaaggacgtagttggtcgcgatagacgccggttagatg-ccaacatcttta-acccggcggtgtccgaatggggaaacccggcccagttcattgggtcactccgtggtgaagatatag--tgggtgtggataccacccgaactgaaacatctaagtagggtgaggaagagaaattaa-caagattccgtcagtagcggagagcgaaatcggaacagcccaaatcttg--ggattatgtttgatagcggaatgatctggaatgttcaaccaaagggagtgaaagtctcgtacgcgaaattaaataccctagaggtatcccgagtacctcggtg---caaatactccgagg…
>CPR_MG_Woesebacteria_GCA_001792225.1
----aagct-acaaacgcaaacagtgaatgccttggtattgagtaccgaagaaggacgcgcatggcagcgatattcgtcgggtaggag-ccacgacctgtg-atccgacggtgtccgaatggagaaatccgaccagcttcat-tggttactctgtcccaagtatatag--cggtagaggtaaccacctgaactgaaacatctaagtaaggtgaggaaaagaaattaa-caagattccgtcagtagcggagagcga
>CPR_MG_Woesebacteria_GCA_001792375.1
tgaagtctttactaacgcagacagtgaatgcctaggatttacctaccgaagaaggacgcacatggttgcgataatcgccggggaggag-ccacgaccattg-atccgacggtgtccgaatggggaaacccaaccataattatttggttaccctatggtaaaagtataa--tagcgggggagaccgcccgaactgaaacatctaagtagggtgaggaaaataaatcaaa-gagattccgtcagtagcggcgagcgaaagcggaatagcctaaactgtg--ggttctttatgaatagtagaagtatctggaatggtacaccatagaaagtgaaagtcttgtatacaaaatttataatcttaggaatatcccaagtaccacggtgcat---ctacaccgtgg…
>CPR_MG_Woesebacteria_GCA_001793075.1
----aagttaattaacgcagacagtgaatgccttggtgcaagttgccgaagaaggacgcacatggtagcgatattcgtcggggaggag-ccacgacctttg-atccggcggtgtccgaatggggaaaccctaccaacttcatttggtaactccaagccaaagacataac-tggtagagggaaccgtccaaactgaaacatctaagtagggcgaggaagagaaatcaatcgatattccgtcagtagcggagagcga
>CPR_MG_Woesebacteria_GCA_001793105.1
----aagctaactaacgcagacagtggatgccttggcgcatgttgccgaagaaggacgtgcatggctacgataatcgtcggggaggag-ccacgaccagtg-atccgacggtgtccgaatggggaaacccaaccgagttcattcggttcttctaggccaagtttataa--gtagaaagggtaccacccaaactgaaacatctcagtagggtgaggaagagaaaacaa-agtgattccgtaagtagcggagagcga
>CPR_MG_Woesebacteria_GCA_001793015.1
----aagctaattaacgcagacagtggatgccttggtacaagttgccgaagaaggacgcacatggttgcgataagcgtcgggaagctg-ccacgagctatg-atccgacggtgtccgaatggggaaacctaatcccactaaacggattgtttcactcaaagtatataa--gtaaaacggagaccacctgaactgaaacatctaagtaaggtgaggaagagaaatcaaccgagattgccttagtagcggagagcga
>CPR_MG_Woesebacteria_GCA_001792115.1
ataagttttcactaatgcagacagtggatgccttggtacaacctacctaagaaggacgtacatggtgacgaaactcagcggggagctg-ccacgagctttg-atccgttggtgtccgaatagggaaacctactcattttga-------acctaatttgaaatctataa--tttaggagggaaccgcccgaactgaaacatctaagtagggcgaggaagagaaaacaa-cgtgattgcgtcagtagcggcgagcgaaagcgcatcagcctaaactctg--ggagttgtcgcggtagcagaacggcatggaattgccgactagaaagagtgaaagtctcgtatgcaaaaccaagacctctagggaattcccaagtaccacggagcac---atactctgtgg…
>CPR_MG_Woesebacteria_GCA_001791995.1
----aagttacagaacgcagacagtggataccttggtcttatctaccgaagaaggacgtacatggtcgcgatagtcgtcggggagctg-ccacgagctttg-atccggcggtgtccgaatggggaaacctctgct---ttat------gcttttcgccaagcctataa--aaaagacgggaaccacccgaactgaaacatctaagtagggtgaggaagagaaaacaa--gtgattgcgcaagtagcggtgagcga
>CPR_MG_Woesebacteria_GCA_000996165.1
----aagt-aaacaacgcagacagtgaatgccttgcttcttatctccgaagaaggacgtacatagccacgaaagtcgccgggtagctg-ctacgagctttg-atccgacggtgtccgaatggggaaacccagccagttttac-tggttacaccatttaaaaattatag--gtgctgtggaaaccacctgaaccgaaacatccaagtaaggtgaggaaaataaatcaa--gagattccgctagtagcggcgagcga
>CPR_MG_Blackburnbacteria_GCA_001816475.1
----gtct-aaagaacgcagacaggggatgccttggtgcaagttgccgaagaaggacgtaaatggccacgatagtcgtcgggtaggag-ccaatacctatg-atccggcggtttccgaatggggaaacccagtccgattaaccggac-accccgagccaagtatataa--cggcggagggaacccggtgaactgaaacatctaagtagccggtggaaaagataccaa--agtattccgttagtagcggtgagcga
>CPR_MG_Blackburnbacteria_GCA_001816455.1
-------tcaaagaacgcagacagtggatgccttggcgcaagttgccgaagaaggacgtagttggcggcgatactcgtcgggtaggag-ccaatacctatg-atccgacggtttccgaatggggaaacccgtcccgcttcatcgggatactccatcccaagtttataa--tgtgagaggatacctggggaactgaaacatctaagtacccagaggaacagataccgaa-ggtattccgttagtagcggtgagcga
>CPR_MG_Beckwithbacteria_GCA_001803445.1
agctactctaattaatgcagataatgaatgccttggctgtttgggccgaagaaggacgtgggtgacgacgaaactcgtcggggaggtgtcaagcacctgta-atccggcggtctccgaatggggaaacccggtccgtttcgacggatcactt--gtcaaagtat-tag--ctagagaggtaagtgcccgaattgaaacatcttagtagggcgaggaaaagaaatcga-agagattccgttagtagcggcgagcgaaaacggaaaagtctaaaccctg--ggagtactgaggatagccgaagtatctggaattgtacgccaaagagagcgaaagccttgtaggcaaaatccaaacccctagaggtatcctaagtaccacgaga---gtcaactcctgtgg…
>CPR_MG_Beckwithbacteria_GCA_001029675.1
----atttgaattaaagcagtcggtggatgccttggatgtattagccgaagaaggacgtgccaggccacgataggcgtcggggagctg-ccaagagctgtg-atccggcggtgtccgaatgggaaaacctcctcattagtaa-gggg-gccccg----------acagg-tcggggggggaacccggggaactgaaatatctaagtacccggaggaaaagaaattaaa-aagatgccgtcagtagcgacgagcga
>CPR_MG_Collierbacteria_GCA_001002205.1
----aagtcaa-aaaagcatatggtggatgccttggcataatgtgccgaagaaggacgtaataagccgcgatagtcgtcggtgaggag-ctaatacctttg-acccggcggtgtccgaatggggtaaccccggttcgtgtaa-ggactacc-------gaga--atat--ttcggtcggtaacccggagaactgaaacatctaagtacccggaggaaaagaaatcga--gagatttccttagtagcggtgagcga
>CPR_MG_Collierbacteria_GCA_009936135.1
----aattcgcgaaaagtagatagcggatgcctaggcaataagagccgaagaaggacgtttaagcccgcgaaagtcgccggggagctg-gcaaaagcttcg-atccggcggtgtccgaatggggtaaccccctctgattcaacagag-agcttg----------ataa--tcaagttggtaagtcggggaactgaaatatctaagtacccggaagaaaagaaatcga--gagattccctgagtagcgacgagcga
>CPR_MG_Chisholmbacteria_GCA_001816955.1
----tgtttcattgaagcagacagtggatgccttggtatcagaggccgaagaaggacgcgcgtggccgcgatagtcgtcggggagttg-ccaagagcggtg-atccggcggtgtccgaatggggaaaccccgccttgcgtaaagggcgagcccc--------ct-tgg--tggggtagggaaccatccgaactgaaatatctcagtaagatgaggaaaagaaatcgaa--agatgcccttagtagcgacgagcga
>CPR_MG_Chisholmbacteria_GCA_001816915.1
----agtttcaataaagcagacagtggatgcctaggcattaaaggccgatgaaggacgcgcatggccgcgatagtcgccgggaagctg-ccaagagctgtg-atccggcggtgtccgaatggggaaacccgcgagtgcgaaac----tacctcgtgtcaaat--acag--gcgaggggggaaccatccgaactgaaatatcttagtaggatgaggaaaagaaatcga-agagatgcccttagtagcgacgagcga
>CPR_MG_Pacebacteria_GCA_001803415.1
----aagtt-aataatgcaggcagtggatgccttggcatagtgtgccgaagaaggacgtacatagccgcgatagtcgtcggggagctg-ctaagagcaatg-agccggcggtgtccgaatggaggaatccctgctggagtaacagcg-accccg----------gtgt--ccgggggggtaagccaccgaactgaaatatctcagtaagtggaggaaaagaaatcgaa-gagattccctgagtagcgacgagcga
>CPR_MG_Pacebacteria_GCA_001803465.1
----aagt-attgaaggcaagtagtggatgccttggcagaacgtgccgaagaaggacgtactaggccacgaaaggcgtcggggagttgccaagaaactgtg-atccggcggtgtccgaatggggaaaccccccct-gtgaa--aggc-actctgcgaggaattcataagacacgggggggtacccggggaactgaaatatcttagtacccggaggaaaagaaaacga--gagattcccttagtagcgacgagcga
>CPR_MG_Pacebacteria_GCA_001000345.1
agaaatgtaaactcaggcaaatagtggatgccttggcaatatgtgccgaagaaggacgcacaagaccgcgaaagtcgtcgggaagctgtcacgaagcaatg-atccggcggtgtccgaatggggcaaccttttctgggttatcagaaaatttttcttt------------gaaaaaggggcacgcaccaaactgaaatatctaagtaggtgcaggaaaagaaaccga--gggattcccttagtagcgacgagcgaacagggaatagtctaaacca----cgat-tgaatttgtagcagaacgccatggaattggcgaccaaagagcatgatagttgcgtatgttaaacgaatcacgatatggatttcctaagtactttcggagacgcaaactccgggag…
>CPR_MG_Pacebacteria_GCA_001786485.1
ttatatgtgaattaaagcagatagaggatgccttggcttgtttggctgatgaaggacgt--aactccgcgaaagtcgtcgggtagctg-agaaaagcgctg-atccggcggtgtccgaatcgggtaaccgcgtcgtatgaaaacgatgacc-tt--------ct-tat--aattgggaggcacctggggaactgaaatatctaagtacccagaggaaaagaaatcgaa-gagattcccttagtagcgacgagcgaacagggaagagcccaaaccg---aggacatttcagactaatagaacaccgtggaataggtggccagaggacgtgaaagccgtgtatatgaaagttcgtgccagtgagtgttcctgagtaggttgggagacgcaaactcccttct…
>CPR_MG_Pacebacteria_GCA_001873435.1
aattatgtgaattaaagcaagtagtggatgcctagacttatctagccgaagaaggacgc--tagcccgcgaaagtcgccgggaagctg-gcaaaagctgtg-atccggcggtgtccgaatagggtaaccttgtcatgagagaatgatgaccttt--------ct-tat--agaggggggataccaggggaactgaaatatctaagtaccctgaggaaaagaaatcga-agagattccctgagtagcgacgagcgaaaagggaacagcccaaaccctt--ggatttttttttgtaaaagaatagagtggaatatttaaccaaagaacgtgatagtcgtgtatttgaaacaaaagaccatagaagattcctgagtaggttgggagacgcaaactcccttct…
>CPR_others_Kazan_GCA_001029795.1
----aagt-atcaagggcatgcggtggatgccttgggagaagtgaccgaagaaggacgtagcagaccgcgttaggcctcgggtaggtgtcaagcacctgtg-atccggggatttccgaatggagcaatcctcccgc-c-aat-tggttatctcatgctgaatacatag--atgtggaggaaaccgtgcgaactgaaacatcttagtagcacgaggaaaatagaacaa--gttattccctaagtagtggcgagcga
>CPR_others_Kazan_GCA_001771215.1
----aagt-atcaagggcatgcggtggatgccttgggagaaatgaccgaagaaggacgtagtagactgcgataagcctcgggtaggtgtcaaacacctgtg-atccggggatgtccgaatggagcaatcctcccgc-c-aat-tggttatcccatgttgaatacatag--atgaggagggaaccgtgtgaactgaaacatcttattagcacgaggaaaatagaacaa--gttattccctaagtagtggcgagcga
>CPR_others_Kazan_GCA_001001025.1
aagcaagt-agtaagggctgtcggtggatgccttgggagaagtagacgatgaaggacgtagcaggctgcgataagcctcgggtaggtgccaagcaccttta-atccggggatttccgaatggggtaaccccccctcactaatccaattatcctatattgaatatatag--tcgcagagataaccacgtgaactgaaacatcttagtaacgtgaggaaaatagaaaaat--ttattcccttagtagtggcgagcgaaaagggaagagtctaaacttca--aaaattattttcttagccgaaatctctggaaagagctaccatagcgagtgacagtctcgtaggcgaaaagaaacttcgagcagttttcttaagtacggcgggacccgtgaaatcctgtcg…
>CPR_others_Kazan_GCA_001771275.1
agtcaagt-atcaagggctattggtgaatgccttgggagaagtagccgatgaaggacgtagcagactgcgataagcctcggggaggtgtcaagcacctttg-agccggggatgtccgaatggagcaatccatccgccc-tatcaaattattttggattgaatacatag--tgcgagagggaaccgcgggaactgaaacatcttagtaccgtgaggaaaagagaacaa--gttattcccttagtagcggcgagcgaaaagggaatggcctaaactcaa--aaaattattttcttagcagaagtccatggaaagggccaccagagaaggtgatagtcctgtacgcgaaaagaaatccgagtaaccaaacttaagtacgacggaacccgtgaaattctgtcg…
>CPR_others_Berkelbacteria_GCA_001774395.1
aagtaatc-accaaaagcacatagaggatgtcttggtagattcagctgatgaaggacgtagtaggctgcgataagcgccggggagctg-ccaacagctttg-atccgacgatttccgaatggggaaacccaacgtcgtgaacctggttatcccacaatgaatacatagagacacggaaggcacccggggaactgaaacatcttagtacccggaggaaaataaagtag--acgattcccccagtagcggcgagcgaaaagggaccagcccaaacttcg-acgatt-attgaattagtctaagaccttggaaaaggccaccgtagagggtgatagtcccgtcgacgaaaattcagcttggatgcttctcctgagtacgactagacacgtgaaatctagtcg…
>CPR_others_Berkelbacteria_GCA_001872655.1
----aagg-a--aagagcgtatggaggatgccttggcacaaacagccgaagaaggacgtaccagcctgcgataagcatcggggaggcggcaaggacctgtg-atccgatgatctccgaatggggtaacccaatgtcgtgaaccaaattatcccactcaaaatatataggtatcggtcgggcacctggggaactgaaacatcttagtacccagaggaaaagaaaacaacggtgattcccctagtagtggcgagcga
>CPR_others_Berkelbacteria_GCA_001872695.1
taagagac-accaaaagtgtatggtggatgccttggcaaaaaacaccgatgaaggacgtagtagcctgcgataagcttcgggtagctggcaaacagctttg-atccgaagatgtccgaatagggcaacctaactgcgtaaacccagttatcccgctcaaaatacatag--tacgattgggtacccgctgaactgaaacatcttagtaagcggaggaaaataaaacaatagtgattccttaagtagcggcgagcgaaagaggaaaagtctagtat---------t-aaattattagcagaataacctggaaaggataaccaaagcgggtgatagtcccgtaagcgaaaattgtatttttattggggtggcaagtactgtcagacacgtgaaatctggcag…
>CPR_others_Berkelbacteria_GCA_001029735.1
aaagatttt-gaaagagtatatggaggatgccttggcatgaaagaccgatgaaggacgcagtaggctgcgatacgcttcggggaggagccaaactcctttg-atccgaagatttccgaatggggtaaccccgctatcgaaga-tagt-atcccgcattaaaaatacaggtgttggatgggcacccggtgaactgaaacatctaagtaaccggaggaatataaaacaacagtgattccctgagtagcggcgagcgaaacgggaatagcctgatt-----------taaaaaattagccgaacagcctggaaaggacgaccaaagcgggtaatagtcccgtaggcgaaaattttccttttcaccaattattaagtactattggacacgtgaaatccagtag…
>CPR_Sa_Saccharibacteria_GCA_002952755.1
aaaaagttacgtaagcgcacacaagggatgccttgacatacaataccgatgaaggacgtaaggagctgcgataagcttcggggagctgctaactagctttg-atccggagatgtccgaatggggaaacccggctggagtcatccagtcaccgctatctgaatatataggagtgtgcaggttaccgcctgaactgaaacatcttagtagggcgaggaagagaaagtaaaaacgattccgttagtagtggcgagcgaatgcggatgagcccaaacttct-acaaattgcgaggcgagcagaagtagttggaaagctacaccaaagacagtgatagtctggtacgcaaagtttcgcttatatttgttttgtcgagtaggtcgggacacgtgaaaccctgact…
>CPR_Sa_Saccharibacteria_GCA_010202845.1
aaaaaggtactcaagggcgctaaatggatgcctagacgtatattaccgaagaaggacgtggaagactgcgataagcctcgggaagctg-tcaacagctttg-atccggggatttccgaatggggaaacccagcatgagtcatcatgttgccacttgctgaacacatagg-agcgagcgggaaccatctgaactgaaacatcttagtaggatgaggaagagaaagtaaaaacgattgcgaaagtagtggcgagcgaaatcgcaacagcccaaacctaa--gaaat-gcgtggttagcagaa-tagtttgaatgactagccaaagagcgtgaaagccgtgtacgcgaaaacgaccttatgtatgttttatcgagtaggacggggcacgagaaaccctgttt…
>CPR_Sa_Saccharibacteria_GCA_016700315.1
agaaagtt-ataaagcgcatataacgaatgccttgacacaaattaccgataaaggacgtagaaggctgcgataagcttcggggagttgcctcacaactttg-aaccgaagatttccgaatggggaaacccagctagagtcatctagttacttttagctgaattcatagg-gataagaggtaaccgcctgaactgaaacatctaagtagggcgaggaatagaaagtaaaaacgattctcctagtagtggcgagcgaacggggatcagcccaaacctta--caaa-tgcggaccgagtagaaacagctggaaagctgtaccaaagacggtgatagtccggtataccaagggtcgttatcatttatgttgtcgagtaggccgagacacgggaaaccttggtt…
>CPR_Sa_Saccharibacteria_GCA_016699935.1
aaaaagttactcaagcgcacacaaaggatgccttgacatgtaataccgaagaaggacgtgatgagctgcgaaaagctccggggaacagccaaatagttttg-atccggagatgtccgaatggggaaacccggctggagtaatccagtcaccgctatctgaatatataggagtgagtaggtaaccgcctgaactgaaacatcttagtagggcgaggaagagaaagtaaaaacgattccggtagtagtggcgagcgaatccggaacagcccaaacctca--gaaattgtgaggcgagcagaagcaactggaaagttgcgccatagacggtgatagcccggtacgccaagtttcacttatatttgtagtgtcgagtaggtcggggcacgtgaaatcctgact…
>CPR_Sa_Saccharibacteria_GCA_001873625.1
aaaaaggtactcaagagcacacaatggatgcctagacgtatattaccgaagaaggacgcggaagactgcgaaaagtctcggggagctg-tcaacagctttg-atccgggaatgtccgaatggggaaacccagtacgagtcatcgtattatctgtctctgaatatatagg-atttgacgggaaccaactgaactgaaacatcttagtaggttgaggaagagaaaataaaaatgattccgggagtagtggcgagcgaaactggatcagcccaaacctaa--aaaattacatcgttagcggaa-tagtttgaatgactaaccaaagaacgtgaaagtcgcgtatgcgaaaacgatttatctgtgtttttctcgagtaggacggggcacgagaaaccctgttt…
>CPR_others_CPR2_GCA_001872935.1
----aggttatataaggtatatgatggatgccttgacaaaaggagccgaagaaggacgtagctggctgcgataagcctcggagagctgttaagcagctttg-acccggggatttccgaatggggcaacctatctcgataaacgagat-gtccttattttaac-----------ggatgggcacctggggaactgaaacatctaagtacccagaggaagataaatcaac-gagattcccttagtagcggcgagcga
>CPR_others_CPR2_GCA_001872945.1
aatcaagcaagtaagggcacaaggtggatgacttggcgtaagaggccgaagaaggacgtagtagcctgcgataagcgtcggtgagctggcaaacagctctg-acccggcgatttccgaatggggaaacccaacgagat-catctcgttactcctatctgaatatatag--aggtagagggcacctggggaactgaaacatctaagtacccagaggaatagacatcaa--gagattccgttagtagcggcgagcgaacgcggatcagcctaaacctaa--aaaat-agaaatttaatggaagaatctggaaagaaccgccatagagggtgatagccccgtacatgaaaaatttcttatacgattatactcaagtaccacgggacacgaggaatcctgtgg…
>CPR_others_Abawacabacteria_GCA_001773455.1
aaataagtctttatgagcatacaatgaatgccttggcgccatattccgatgaaggacgcggtaggtcgcgatacgccccggggagcta-ccaacggctttg-atccgaggatttccgaatggggaaaccttcttacagaaataagaatcccgct----------------gcgggaaggcaacttggggaactgaaatatctcagtacccaggga-aaagaaatcaa-tgagattcccctagtagtgacgagcgaaaagggaacagcccaaacct---ggatcttgtttttttagtcaaggactctggaaagagccgccatagagggtaacagccccgtcgacgaaaaagaaaggttacgtagtatcctgagtagggtcggacacgtgaaatccggcct…
>CPR_Pe_Peregrinibacteria_GCA_001872565.1
----aagt-attaaaagcaaataggggatgcctaggcttaggattccgatgaaggacgtggttggctgcgataagcttcggtgagccg-tcagcagctgtg-acccggagatttccgaatggggaaacccagctccgatgatggagttgttttg----------acaa--tcaaatcggacacttggtgaactgaaatatcttagtaacca-aggacaagaaatcaa--gagattcccttagtagtgacgagcga
>CPR_Pe_Peregrinibacteria_GCA_001430755.1
aaaaacgttatc-atcgcatcacatggatgcctcgactctgtactccgaagaaggacgtagccagctgcgataagcctcggcaagccgctaggcagcgctgtagccggggatttccgaatggggaaaccccatggaagttattccatgaccccg-----------taag-gtggggaggtcactctgcgaactgaaacatctcagtagca-ggggaaaagaaatcaaaagagattctccgagtagcggcgagcgaaaggggaacagcctaaacct---------tgctgtcatagacaacgtccctggaacgggcggccatagcgggtgagagccccgtagtcgaaatgacagacgggtgaggattcctgagtaaggtcggacacgtgaaatccggccc…
>CPR_Pe_Peregrinibacteria_GCA_016699755.1
gaaaaga-aagtattggcaagaaatggatgcctcgattctagattccgatgaaggacgcggaagccggcgatacgcctcggtgagcgggcaaatagcattg-acccgaggatttccgaatgggggaacccatcccgatacgtcgggaaagctccggatgaataaatag--ggttgcaggatacgcagtgaactgaaacatctcagtaac-tgcggaaaagaaatcaaaagagattccctgagtagtggcgagcgaaacgggaaaagcccaaaccctc--tgaatt-tccaggaagccatgactcctggaacggacagccatagcgggtaagagccccgtaggcgcaagcggattcggtaggatgttcctgagtagggtcggacacgtggaatccggctt…
>CPR_Pe_Peregrinibacteria_GCA_016699515.1
aatcaagttactaagagcatataatggatgccttgacactttgttccgatgaaggacgtggaaaactgcgataagcttcggtgagccgttatacagctttg-acccggagatttccgaatgggtgaaccccgtcgatgttattcggcgaccctcaactgaattcatagg-gaggagaggatactcagcgaactgaaacatcttagtagc-tgaggaaaagaaatcaaatgagattcccttagtagtggcgagcgaacagggaaaagcccaaacccta--gactttactttgataaccaaggaccctggaaagggccgccatagagggtgatagccccgtcggtgaaatcaaaactcttaagatgttcctgagtagggtcggacacgtgaaatccggctt…
>CPR_Pe_Peregrinibacteria_GCA_016699145.1
tacaacattaaaaaaagcatagaatggatgccttgactcaaaactccgatgaaggacgcggccagctgcgataagcttcggcgagctgctaagcagctttg-acccggagatttccgaatggggaaaccttacaagagttatcttgtaacctcg----------a-----aagaggtggacactaggggaactgaaacatctaagtaccctggataaaagaaatcaatagagattcccgtagtagcggcgagcgaaccgggatcagcccaaacctcg--aggcttctcctattagccaacgaccctggaaagggcggccaaagagggtgatagccccgtcggcgaaaataggatctccagagtgttcctgagtagggtcggacacgtgaaatccggcct…
>CPR_Pe_Peregrinibacteria_GCA_000993595.1
taaaaagttactcaatgcatagagcggatgccctggcacttaacttcgatgaaggacgtggctaactgcgataagtttcggcgagctg-tcagcagctatg-acccggaaatttccgaatggggaaacccaattcgagttatcgaattactccg----------a-----aggagagagttactcggcgaattgaaacatcttagtaac-cgaggaaaagaaatcaa-tgagattcccttagtagtggcgagcgaagagggaaaagcccaaaccatg-atcta-tattttcttaatcaaggtctttggaaaaagccaccatagagggtgatagtcccgtaggtgaaaagaaaaaatctagaagtatcctgagtaggatcggacacgtgaaatccggttt…
>CPR_Pe_Peregrinibacteria_GCA_001787455.1
----aagt-attaaaagcagaaagtggatgcctcgacttcaaactccgacgaaggacgtagctagttgcgataagcttcggtgagccgctaagcagcaatg-acccggagatttccgaatagggtaacctttagtcagtcat-gact-ataatatgcaaaattcatatgcatattaaggcgacctagcgaactgaaacatcttagtacctag-ggaggagaaatcaatagagattcccttagtagtggcgagcga
>CPR_Pe_Peregrinibacteria_GCA_000999445.1
aatcaagttaaaaagggcaaagagtggatgcctcgactcaaagttccgatgaaggacgtgactaactgcgataagcctcggcgagctgttaagtagctttg-acccggggatttccgaatgggggaacccaactccggtaatggagttaccctg-----------caaa-tgcgggaggacacacagggaactgaaacatctaagtacc-tgtggaaaagaaatcaaccgagattcccttagtagtggcgagcgaaaagggaacagcctaaaccatgcatcgactgcattgttaaccaaaggctctggaaagtgccgccatagtgggtaatagccccgtcggtaaaagcaattggttggatgtgttcttaagtagggtcggacacgtgaaatccggcct…
>CPR_Pe_Peregrinibacteria_GCA_001788875.1
gaataaattaaaaaaggcatagagtggatgccctgacttgagactccgatgaaggacgcggctagctgcgataagcctcgtagagttgctaagcaacagtg-acacgaggatttccgaatgggggaacccaatccgagtaatcggatttttccg----------gcga--ccggtaaggacactttgcgaactgaaacatctaagtagc-aaaggtaaagaaatcaaacgatattcccttagtagtggcgagcgaaacgggaacagcccaaactttg--gatttttctctattagccaatatctctgggaagtgataccaaagagggtaaaagtcccgtaggcgaaaataggaatcctaggaagttcctaagtaagatcggacacgtgtaatccggtct…
>CPR_Pe_Peregrinibacteria_GCA_001788965.1
atatatgt-act-aacgcatcacacggatgcctcgactctctattccgacgaaggacgtggccagctgcgataagcttcggtcagccgctaggcagcgccc-agccgaagatttccgaatggggtaaccccatggg-tgaat-ccat-accccg-----------tac--cggggaggtatactctgcgaactgaaacatctaagtagcggggaaaaagaaatcaaa--gagattgccctagtagtggcgagcgaacaggcaaaagcccaaactg---acgattcacaaacgtaggcaaacgccctggaacgggcggccatagacggtgatagcccggtagccgaaacgtgacacggtggaggattcctgagtaaggtcggacacgtgaaatccggccc…
>CPR_Pe_Peregrinibacteria_GCA_001787555.1
gaaaacgt-atcatgcgcatcacatggatgcctcgactctgaagtccgatgaaggacgtggccagctgcgataagcctcggtcagccgctaggcagcgctc-agccggggatttccgaatggggaaacccatggagggttatcccat-actctgtttggaatgcatag--gtcgagaggtaactctgcgaactgaaacatctcacgtagcaggagaagagaaatcaa--gagattccccaagtagtggcgagcgaaaggggaacagcccaaaccc---------tccattgttagaccaacaccctggaacgggcggccatagagggtgatagccccgtcgtcgaaaacagcattggtagggatttcctgagtagggtcggacacgtgaaatccggcct…
>CPR_Pe_Peregrinibacteria_GCA_001004735.1
----acgt-atcatacgcattacatggatgcctcgactctgtactccgaagaaggacgtggccagctgcgataagcctcggtaagccgctaggcagcgctatagccggggatttccgaatgaggaaactccatctccgttatgagatgaccctg----------ataa--acagggaggttactctgacaactgaaacatctcagtagca-gaggaaaagaaatcaa--gagattcccaaagtagtggcgagcga
>CPR_Pe_Peregrinibacteria_GCA_001872575.1
aaaaacgt-atc-atcgcatcacatggatgcctcgactctgtattccgaagaaggacgtagccagctgcgataagcctcggcaagccgctaggcagcgctatagccggggatttccgaatggggaaaccccatggaagtcattccatgaccccgcgcgaagcgcatgaa-gcggggaggtcactctgcgaactgaaacatctcagtagcg-gaggaaaagaaatcaa--gagattctccgagtagtggcgagcgaaaggggaacagcccaaacct---------tgctgtcatagacgaactccctggaacgggcggccatagcgggtgagagccccgtagtcgaaatgacagacgggtgaggattcctgagtaaggtcggacacgtgaaatccggccc…
>CPR_others_Gracilibacteria_GCA_002761215.1
----aaattaagaaaagcataaaatggatgccttgactcgaatatccgaagaaggacgtgcaaatctgcgataagcctagaggagttgataagaagataaa-actctaggatttccgaatgggggaacccaatgtaggtaat-acattatc-------------ataaaaatatgaaggacacattgtaaactgaaatatctaagtagc-aatggaaaagaaatcaaaagagattcccttagtagtgacgagcga
>CPR_others_Absconditabacteria_GCA_001007975.1
aataagtcttttaagagccagggacggatgccttgggtacaaaagctgaagaaggacgtaattgactgcgaaaagttctggtaaggtgtcaataagctatc-aaccagaaatctccgaatgggacaacctatcgccta-tatgatgtt----------------------tataaacagcaagcatgtgaagtgaaatatctcagtagcatgaagaaaagaaatcga-agagattcccttagtagtgacgatcgaacagggaagagtctaaactgtatataaa-tatgatggcagcggaatgg-attagatatccagtcacagagggtgatagccccgtacgtaaacctatctctcttcaataactcccaagtaatatcggacacgtgaaatccggtat…
>CPR_others_Absconditabacteria_GCA_000503875.1
----aaactattaaaagcaatgagaggatgccttgggtagaaaagaggatgaaggacgtagttggttgcgaaaagttccggtaaggtgccaacaggtttgg-agccggaaatgtccgaatgggagaacctggtccgtataac-ggatcgcc-------------a-----tataggccaaaacctggtgaagtgaaatatctcagtagccagaggaaaagaaatcga-agagattcccgtagtagtgacgagcga
>CPR_others_Andersenbacteria_GCA_001817065.1
----acac-gttaagagtatatagtggatgccttggcaatggacgacgaagaaggacgcggccggctgcgataagcctcggggaggtgctgagcacctttg-atccggggatgtccgaatggggaaacccctaccgat-cat-cggt-atc-ca----------atta--tttggaggttaacctggtgaactgaaacatcttagtaaccagaggaaaagaaaagaagggatattcccctagtagtggcgagcga
>CPR_others_Andersenbacteria_GCA_001817115.1
----acac-gttaagagtatatggtggatgccttggcaataaacaacgatgaaggacgtgaccggctgcgataagctacggggaggtgctgagtaccgtta-atccgtagatttccgaatggggaaacccccttacgt-aatgggactaccctg-----------cag--ggatagggacaaccttgcgaattgaaacatcttagtagcaagaggaaaagaaacgaaaagacattctcttagtagtggcgagcga
>CPR_others_Doudnabacteria_GCA_001777525.1
aagtaagtaagaaagagtacacggtgaatgccttggcacaaaaagccgatgaaggacgtagaagtctgcgaaaagcctcggggaggtgacaaacacctttg-atccggggatctccgaatgggacaacctagcgtggtaaac-acgctgctt--cgcagaag---tag--tgaagacgggaactgtgcgaactgaaacatctcagtagcatgaggaaaataaagcaagtgcgattcccctagtagtggcgagcgaacggggatgagtctaaacttta--gaaat-ggttggttagccgaacgtcctggaaaggccggccaaagaaggtgatagccctgtaggcgaaaacttaattccgagttttttcttaagtacggccagacacgtgaaatctggcct…
>CPR_others_Doudnabacteria_GCA_001779845.1
taaaacac-gataagggtgtacggtgaatgccttggcacaagaagccgatgaaggacgcaggagccggcgatacgcctcggggagctggcaaacagcttcg-atccggggatgtccgaatggggaaacctatccaagtaaac-tggttgct-catacgtggtgtatgg----gctgcggtaaccatgcgaagtgaaacatctcagtagcatgaggaaaagaaaacaagagccattcccctagtagtggcgagcgaacggggagcagccaaaactccggaaaaat-agctgtctagtagaatcgcctggaaaggcggaccaaagagggtgatagtcccgtacgcgaaagatcttttcctgactggttcttaagtactacgagacacgtgaaagctcgtag…
>CPR_others_Doudnabacteria_GCA_001779985.1
aattaaacaaataagggtgtatggtggatgccttgacagtttgagcctaagaaggacgcagcaacctgcga-aagcttcggtgaggtggtaagcacctttg-atccggaggtgtccgaatggggaaacctatctgtttgaagcagat-atcccgtggtggat--a-----cgagatcgggaaccatgcgaagtgaaacatctcagtagcatgtggaaaagaaaataag-gtcattctcctagtagtggcgagcgaacggggaggagtctaaactatt--cagtt-agctgtttagccgaatggtctggaaagaccagccaaagaacgtgatagccgtgtaggcgaaaaacctcttccgaatggtttgttaagtacaactagacacgtgaaatctagttg…
>CPR_PB1_Jacksonbacteria_GCA_001818275.1
tttaaagcgaataagggcgcatggtggatgcctagggtctgagaggcgatgaaagacgtggtaagctgcgataagctacggggaggtg-cacacgccgttatatccgtagatttctgaatgggacaacctaatatactgaagatattactctgc----------------aaagagagccaaccccgagaactgaaacatctaagtaccgggaggaaaagaaaataataatgattccctgagtagtggcgagcgaaaagggaagagcccaaaccgagaa----gttgttatcaaaccgaatcatctggaaagatgggccatagcaggtgatagccctgtaagtacaaattaa-ggacgagcagtatcctgagtaacgcgggaccggaggaatcttgcgt…
>CPR_PB1_Jacksonbacteria_GCA_001818275.1_2
gcatatttaagcaagggtatacggtggatgcctcgacttagaaagccgaagaaggacgtagcagcctgcgaaaagcctcggggaggtggcaagcacctttg-atccgtggatgtccgaatggggaaacctatcgttcatgaaatgagcgatgtccattgcctag------aatggatgggaacctggggaattgaaacatcttagtacccagaggaaaagaaatcgaa---gattcccttagtagtggcgaacgaacggggaacagtccaaatttac-t-agtcttgatgtttagtaaaatcccgtggaaaagggagccatagaaggtgacagccctgtatgcaaaaaacatttatcgttatttttctcgagtaacatgggacccgtgaaatcctgtgt…
>CPR_PB1_Kerfeldbacteria_GCA_001818285.1
gcatgctcatcgaagggtatatggtggatgccttgacacacaacgacgatgaaggacgtaggagcctgcgataagcctcggggaggtggcaaccacctgtg-atccggggatatccgaatggggaaaccccctgtccgtttgcggga--tcatgcactgaatacatagg-gtatgaagaacacctggtgaattgaaacatcttagtagccagaggaaaagaaactaacaaacattcccttagtagtggcgagcgaacggggaaaagccaaaactctg-agtgctccaattcgtagcagaatgggctggaatgctcaaccatagaaggtgaaagtcctgtacgcaaaacgagtctacgataatttctctcgagtaccatggaacacgtgaaattctatgg…
>CPR_PB1_Kerfeldbacteria_GCA_001818785.1
----gcgtgaacaagggtatatggtggatgcctagacattgtttagcgataaaggacgtagcagactgcgataagcctcggggagtggtcaagcaattttg-atccggggatgtccgaatggggtaacccactgtggtaaa-cacagtatcaatcagtgaatacatag--gattgaagcacacccagggaactgaaacatcttagtacctggtggaatagagaccaat-ggtattcccctagtagtggcgaacga
>CPR_PB1_Kerfeldbacteria_GCA_001818775.1
----aca-aaataagagcgtagagtggatgccttgacatataaagacgatgaaggacgtagcagtctgcgataagcttcggtgaggtgacaagcacctgtg-acccggagatgtccgaatggggtaacccggctgagcaaacccagtcatc-aacactgaatacatag--ttttgaaggtaacctggggaattgaaacatcttagtacccagaggaaaggaaacgaag-gtgattcccctagtagtggcgaacga
>CPR_PB1_Kerfeldbacteria_GCA_001818315.1
gattcaacaagcaagagcatatggtggatgcctagacatgcaaagccgatgaaggacgtagcagcctgcgataagcttcggggaggtggcaagcacctttg-atccgaagatctccgaatggggaaacccttccgatagaagcggaa-atcatgcactgaattcataggtgcatgaggacaacctagtgaattgaaacatcttagtagctagaggaaaagaaagaaattgcgattccctgagtagtggcgaacgaaaagggagcagcaaaaacctta-acaaacaaaatacttagaagaacgccgtggaaaaggaggccatagaaggtgacagccctgtatttaaaaagtgtctatggtaggtattctcgagtaccatgggacacgtgaaatcctatgg…
>CPR_PB1_Komeilibacteria_GCA_001818395.1
agtagttacaacaaaggtatatggtggatgcctagacactgcatgacgatgaaggacgtagcagcctgcgataagcctcgggaaggtggcaagcaccgttg-atccggggatttccgaatggggaaacccaatcctgtgaa-aggattacagctgtctgaattcatagg-cagttgagtgcaccttgggaactgaaacatctcagtaccaagaggaacagaaagaatactctattcccctagtagcggcgagcgaacggggaggagcccaaacttcg-a-atatatcctccatagtagaatccgctggaatgcggagccaaagaaggtgatagccctgtacgcgaaatgggtctgctgt--agcttcttgagtaccacgaggctggagaaaccttgtgg…
>CPR_PB1_Komeilibacteria_GCA_001818445.1
-------taattaagggtatatggtggatgccttgacatcaaaagacgatgaaggacgtagcaatctgcgataagcttcgggtagctgataagcagctttg-atccggagatctccgaatggggaaacccttccgtgtaaa-gcggaaactactaagcgaatacatag--agttagagaatacccagcgaattgaaacatctcagtagctggaggaatagaaagaa-tctcgattccctgagtagtggcgagcga
>CPR_PB1_Falkowbacteria_GCA_016699775.1
ggaaaatt--gtaagggtgtatggtggatgccttgactcaagaagacgatgaaggacgtagcagcctgcgataagcctcggtaaggtggcaagcacctttg-acccgaggatttccgaatggggaaacctatcctgttgaagaggat-gtccctcgctgaacacataggcgtgagacgataacccggtgaactgaaacatcttagtagccggaggaaaagagaacaattgcgattccccgagtagtggcgagcgaaaggggagcagcccaaaccaaa--cgac-gattttattagttgaatgagctggaaagctcggccagagacggtgatagcccggtaagcgaaaataattatgatgacatattcttaagtattgcgagactcgtgaaatctcgtga…
>CPR_PB1_Falkowbacteria_GCA_001780195.1
tcaagca-aaataagggcgtatggtggatgcctagacatcaaaaggcgatgaaggacgcagcagcctgcgataagcctcggttaggtggcaagcacctttg-atccggggatttccgaatggggaaacccagccgccgttaagcggctatcctatactgaatacataggtatagggcgcgcacccggggaattgaaacatcttagtacccggtggaaaagaaaataaa-atgattcccctagtagcggcgagcgaaaggggaatagcctaaactcta--taactatgtttcttagcggaacgtcctggaaaggccggccatagcgggtgaaagccccgtacgcgaaaagaaatctattgttatattctcaagtattgcggaactcgagaaattccgtga…
>CPR_PB1_Falkowbacteria_GCA_001778095.1
----gtgtacataagggcgtatggtggatgcctagacatca-aaaacgaagaaggacgtagtagcctgcgataagcctcggttaggtggcaagcacctttg-acccggggatttccgaatggggtaacccgctttgattgaacaaagcatcactgtctgaataaatagggcagtgaagacgacctggtgaagtgaaacatctcagtagccagaggaaaagaaaacaagttccattcccttagtagcggcgagcga
>CPR_PB1_Falkowbacteria_GCA_001778235.1
----acatactcaagagcgtatggtggatgccttgacatcaaaagacgatgaaggacgtagcaatctgcgataagcttcggggaggtgataagcacctttg-atccggagatctccgaatggggaaacccagtcgagtaaa-tcggctatctctacctgaatacataggtagttgaagaagacctggggaagtgaaacatctcagtacccagaggaatataaagtaaa--cgattcccttagtagtggcgaacga
>CPR_PB1_Falkowbacteria_GCA_001778005.1
tgaagagttattaagggtatatggtggatgccttgacattaaaagacgatgaaggacgtagcagcctgcgataagcctcggggaggtggcaagcacctttg-agccggggatttccgaatgggggaacctatcccgatgaa-cggat-gtcttaacttgaattcatagagaagagacgagtacccggggaactgaaacatcttagtacccggaggaaaagagaaaaaagcagattccgttagtagtggcgagcgaaaacggagcagccaaaatttcc--aaactagcttccctagcagagcggtctggaaagaccggccaaagacggtgatagcccggtacgcgaaaggggtctacggcaatctttcttaagtaaggcgggactcgtgaaatcccgttt…
>CPR_PB1_Falkowbacteria_GCA_001778085.1
gaagagtaatttaagggtgtatggtgaatgccttgacattatgagacgatgaaggacgtagcagcctgcgataagcctcgcttaggtggcaagcacctttg-acgcggggatttccgaatggggaaacctatcctgatgaa-caggagacctagcatttatg--------ttaggtggagtacccggggaactgaaacatcttagtacccggaggaaaagaaaaaaattgcaattccgtcagtagtggcgagcgaacgcggagaagcctaaacttaa-a-atataacttccctaggagaacggtctggaaaggccggccaaagacggtgacagcccggtacgcgaaaggggtctacggtgtatgttcttaagtagggcggaactcgagaaattccgtct…
>CPR_PB1_Falkowbacteria_GCA_000997945.1
gggaaaac-attaagggtatatggtgaatgccttgactcaagaagacgatgaaggacgtagcagcctgcgataagcctcggttaggtggcaagcacctttg-atccgaggatttccgaatggggaaacctattccgattcatcgaat-gtccccagctgaatacatag--gtgagacgactacccggtgaactgaaacatcttagtagccggaggaaaagaaaataatagtcattccccgagtagtggcgagcgaaaggggatcagtctaaacctta-ataaat-actttcctagttgaaggagctggaaagctccgccagagcgggtgatagccccgtaagccaaaggagttctacgataacattcttaagtactgcgggactcgtgaaatcccgtac…
>CPR_PB1_Falkowbacteria_GCA_000992665.1
gaaaatcc-attaagagtatatggcggatgccttgacataagagaacgatgaaggacgtagcagcctgcgataagcttcggtgaggtggcaagcacccttg-acccgaagatttccgaatggggaaacctccccggttgtagcgggggtccgctggctgaacacataagcgtgagacgattacccggtgaattgaaacatcttagtagccggaggaaaagaaaaaaaggaatattccgtgagtagtggcgagcgaaaacggaggagtctaaaccgca-acaat-aacatccctagttgaaggagctggaaagctccgccagagaaggtgaaagccctgtacgcaaaaggggttctgcggcatatctcttaagtactgcgggactcgtgaaatcccgtgg…
>CPR_PB1_Falkowbacteria_GCA_000999715.1
gaaaatctcaataagagtatatggtggatgccttgacataagaagacgatgaaggacgtagcagcctgcgataagccgcggtgaggtggcaagcacctttg-acccgcggatctccgaatggggaaaccctctccattgaagggaga-agctca----------gtaaggcgagctggaagacccggtgaactgaaacatcttagtagccggaggaaaataaaataa-aatcattccctgagtagtggcgagcgaaaggggagaagtctaaacccaa--aaaa-acaattcttagttgaacgagctggaaagctcggccagagacggtgatagcccggtaagcgaaaagaatttcgtggcttttgtcttaagtaggacgggactcgtgaaatcccgttt…
>CPR_PB1_Kuenenbacteria_GCA_001871365.1
attcgcaatttttaatgcatatggtggatgcctcgacttaaaaaggcgatgaagggcgtagcaatctgcgataagccacggggagctgataagcagctttg-atccgtggatttccgaatggggaaacccaactacgaaaattcattaatctttcaaaataaaaatttg-gcgggaagtaaacccgctgaagtgaaacatctcagtaagcggaggaaaagaaaacaacggcaattcccctagtagtggcgaacgaacggggaacagtctaaacccag-tacaaaaactatttagccgaactccgatggaaatggagaccaaagaaggtgatagtccagtaggcaaaaaatagatcctatgagttttcttaagtaggccaggacacgtgaaatcctgcct…
>CPR_PB1_Uhrbacteria_GCA_001873525.1
caggatat-caaaagagtatacggtggatgcctcgacacgaaaagccgacgaaggacgtagcaacctgcgataagcctcggggaggtggtaagcacctgtg-atccgtggatttccgaatggggcaacccatcttgagtcatcaagatatcatcgcctgaatacatagggcggtgaagggcacccgctgaagtgaaacatctcagtaagcggaggaaaaaagaacaattgtgattccccgagtagcggcgagcgaaaggggacaagcctaaaccgta-agtta-tacttccttagtagaaagggttggaatgccctgccagagaaggtgaaagccctgtacgcgaaaagggtttacggttattgtcttcaagtaccacgggactcgagaaaccctgtgg…
>CPR_PB1_Uhrbacteria_GCA_016699205.1
gttgaagcacataagggcatacggtggatgacttggcagtgagagccgacgaaagacgttggagcctgcgataagcttcggggaggtggcaaccgcctttg-atccggagatctctgaatggggaaaccccttcgcgtgaa-cgatg-atcgaccactgaatacataggtggcagaagggcacctagggaagtgaaacatctcagtacctagaggaaaagaaactaaa-aggattcccttagtagtggcgagcgaaatgggaacagtccaaacttta------tctgatgaatagttgaatccactggaaagtggaaccaaagacggtgatagtccggtaaacgaaattcatcatctggtccagatccaaagtacgacgaggaacgagaaacctcgttg…
>CPR_PB1_Uhrbacteria_GCA_000405185.1
-----------t-acagcatatggtggatgccttggcacaaaacggcgatgaaggacgtagcagcctgcgataagcctcggagagctggcaagcagcattg-atccggggatttccgaatggggaaaccctactatcgttat-tagtaactccg-----------taag-atggagagcgtacccgctgaagtgaaacatctcagtaagcggaggaaaagaaaataa--atgattccctgagtagtggcgagcga
>CPR_PB1_Uhrbacteria_GCA_001791115.1
gggagcacacataagggcgtatggtggatgcctagacacgagatgccgaagaaggacgtagcagcctgcgataagccgcggggaggtggcaagcacctttg-atccgcggatctccgaatggggaaacccggtcccgcagaacgggacacccggcgctgaatacatagg-gacgggagggcacccagggaagtgaaacatctcagtacctggaggaagagaaaaaaatctgcattccccaagtagtggcgagcgaacggggaacagcccaaaccttg-g-cca--tctttcctagcagaacggtttggaaaaaccgaccatagcgggtgatagtcccgtacgcgaaaggagtcttctgtcattattcttgagtaccacgagactcgtgaaatcttgtgg…
>CPR_PB1_Uhrbacteria_GCA_001791415.1
----------tcaagggcgtatggtggatgccttgggatggagaggcgatgaaggacgtagcagcctgcgataagcgtcggggagctggcaagcagctttg-atccggcgatgtccgaatggggcaaccctatgcagtgga-tgcataatctcc--------acacaagtgggcgaagtaaacctggtgaagtgaaacatctcagtaaccagaggaaaagaaaataaaggatattcccctagtagtggcgagcga
>CPR_PB1_Uhrbacteria_GCA_001791275.1
gccgaggcacgtaagggcgtacggtggatggcttggcaggaggagccgatgaaggacgtagcagcctgcgataagcttcggggaggtggcaagcacctgtg-atccgaaggtctccgaatggggaaacctatgtcgatgaa-cgacatgccatgttctgaatacataggaacatggagggcacctggggaagtgaaacatctcagtacccagaggaaaagagaataatctcgattccgtcagtagcggcgagcgaacgcggacgagcctaaactttg------ccagattcttagctgaatccactggaaagtggaaccaaagacggtgatagtccggtaggcgaaaagatttcggtgtccctgatccaaagtactacggggctcgagaaaccccgtgg…
>CPR_PB1_Uhrbacteria_GCA_001303185.1
agggagc-attcaagggcgtatggtggatgcctagacacggaaagccgatgaaggacgtagcagcctgcgaaaagcctcggggaggtggcaagcacctttg-atccggggatttccgaatggggaaacctggtccgccgga-cggatcgcaa--tccagggcac-tgg----tgcgcgggcacccgctgaagtgaaacatctcagtaagcggaggaaaggaaaaaaacttccattccctaagtagtggcgagcgaaaggggaacagcccaaacccca-aagac-gcggagtctaggggaacggcttggaaaagccggccaaagagggtgaaagccccgtacgtgaaagacacctgctatggattctcgtgagtagcgcgggactcgtgaaatcccgtgt…
>CPR_PB1_Uhrbacteria_GCA_001791035.1
gtagagc--attaagagcatacggtgaatggcttgacagtatgtgccgatgaaggacgtcgtaacctgcgataagcctcggggaggtggtaaacacctttg-atccggggatttccgaatggggcaacctagcatggagcatcatgttggcc--acgtgaacacatag--tgtcgttgggaacccagggaagtgaaacatctcagtacctggtggaaaagaaaataactaccattccctaagtagcggcgagcgaacggggaacagcctaaactccg------ctgtcaatatagttgaatcttctggaaagaagaaccaaagaaggtgatagtcctgtacgcgaaatattggcgatgagtgtattcctaagtactacgaggcacgtgaaaccttgtag…
>CPR_PB1_Uhrbacteria_GCA_000997055.1
ggagggctactcaagggtgtatggtggatggcttgacaaaacatgctgatgaaggacgtagcagtctgcgataagcttcggtgaggtgacaagcacctttg-acccggagatgtccgaatggggaaacccggctggggtaatccagtcactgtgcactaaatacataggtgtacaggaggcacccagggaagtgaaacatctcagtacctggaggaaaagaaaataacttacattcccaaagtagtggcgagcgaaatgggatcagcctaaaccatg--tata-atgatctttagtggaatcttctggaaagaagaaccaaagaaggtgatagtcctgtacgcaaaaaggatcatacggtctggcacttaagtacggcgggacacgtgaaatcctgtcg…
>CPR_PB1_Uhrbacteria_GCA_001001645.1
----agac-attaagggcatacggaggatggctagacagaacgtgccgatgaaggacgtagcagcctgcgataagcttcggggaggtggcaagcacctttg-atccggagatttccgaatggggaaacccgttacgttgaa-cgtatcatctaccgctgaatatatagg-gtatgaagggcacctggggaagtgaaacatctcagtacccagaggaaaggaaaaagatgtccattccctaagtagtggcgaacga
>CPR_PB1_Uhrbacteria_GCA_001791725.1
----agac--ataagggcatacggaggatggctcgacagaacgtgccgatgaaggacgtagcagcctgcgaaaagcttcggggaggtggcaagcacctttg-atccggagatatcctaatggggaaacctaatgcggggaatcgcattgtcctgcgctgaatacataggcgcaggtcgggcacctggggaagtgaaacatctcagtacccagaggaaaagaaaaagatgtccattccctaagtagtggcgaacga
>CPR_PB1_Uhrbacteria_GCA_001791475.1
acgcatcttaagaagagcatatggtggatgccttgacatcaaacgacgatgaaggacgtagcaatctgcgataagcttcggggaggtgataagcacctttg-atccggagatttccgaatggggaaacccggccctaatgaatgggtcatc-cccactgaatacataggtgtgtgaagaagacctggcgaagtgaaacatctcagtaaccagaggaaaagtaaacaattgttattcccagagtagtggcgagcgaaatgggattagcccaaactctg--gcat-tatgacgttaaacaagggtcctggaaaggcccgccaaagaaggtgatagccctgttgttgaaaacgttactgtgcagttgttctcgagtacggccagacacgtgcaagctggtcg…
>CPR_PB1_Magasanikbacteria_GCA_000996735.1
aagaagac-acaaagagcatatggtggatgccttgacatcaaaaggcgatgaaggacgtagcagcctgcgaaaagtctcggggaggtggcaagcacctttg-atccgggaatttccgaatggggcaaccctgcgcgatgga-cgcgt-actcca--------acgcaag-ttggagagcatactcggcgaagtgaaacatctcagtagccgaaggaaaataaatcaat-gagattccccaagtagtggcgagcgaacggggaacagtctaaacctga--gaagtatcttccctagtagaatcacgtggaatagtgggccaaagaaggtgaaagccctgtacgcgaaaggggattacggtgatcgttcacaagtatcaccagactcgcgaaatctggtga…
>CPR_PB1_Magasanikbacteria_GCA_000998685.1
ggagaagagcgtaagaggtatgtgtggatgccttgacattagaagacgatgaaagacgtagcagcctgcgataagcttcggggaggtggcaagcacctttg-atccggagatctctgaatggggcaacccctcttggc--------gttgaaccgagagaccgcaccgc-gtgcggggtgtacctggcgaagtgaaacatctcagtagccagtggaaaagaaataggt-tatattccctaagtagtggcgagcgaaaggggagaagtctaaacctga-gaaaaaacaatttataacagaatcttctggaatgaagaatcatagagggtgataatcccgtatgtgaaataaatctgctttggttgttcacaagtactaccagactcgtgaaatctggtaa…
>CPR_PB1_Magasanikbacteria_GCA_001783215.1
----aattaaataagagtgtatggtgaatgccttgacaccaaaagacgaagaaggacgtggcagggtgcgataagcctcggcgagctcccaagcagctttg-acccgaggatttccgaatggggaaacccggcttcgacgtatcgaacatcttatactgaattcataggtgtaagaagaagacctggcgaagtgaaacatctcagtagccagaggaaaataaatcga--gagattcccccagtagtggcgagcga
>CPR_PB1_Magasanikbacteria_GCA_001783135.1
cgcaatttaaacaagggcgcacggtggatgcctagacaccaaaagacgatgaaggacgccgcagggtgcgaaaaatctcggtgaggtcccaagcacctttg-acccgggagtatccgaatggggaaacccggttgtgtcaagacgatcattacacactgaattcataggtgtgtgaagtaaacctggcgaagtgaaacatctcagtagccagaggaagaaaaatcga--gagattcccttagtagtggcgagcgaaaagggaaaagcacaaaccaaa--taat-aactttcctagttgaatcctttggaaagaggagccgtagagggtaatagccccgtaagcgaaaggagtttatagtttatgttcttgagtagggcgaaactcgtgaaatttcgtct…
>CPR_PB1_Magasanikbacteria_GCA_001784455.1
----aattaaataagtgcgcatggtggatgccttgacaccaaatgtcgacgaaggacgttgtagggtgcgataagctgcggagaggtcccaaacaccattg-acccgcagatttccgaatgaggaaactctcttgctgaagacaaga-atcttttactgaatacataggtaactgaagacaacccagcgaagtgaaacatctcagtagctggaggaaaataaatcga--gagattcccttagtagtggcgagcga
>CPR_PB1_Magasanikbacteria_GCA_001784435.1
cgcaatttcattaagggcatacggtgaatgccttgacaccaaaagacgatgaaggacgtggcagggtgcgataagtctcggggaggtcccaagcacctttg-atccgggaatttccgaatggggaaacccataccgattta-cggtatactgtacagtgaatacatagctgtacggagaaaacctggcgaagtgaaacatctcagtagccagaggaaaagaaattga--aagattcccttagtagtggcgagcgaaaagggaaaagtccaaaccggt--agtt-atccttcctagttgaaatccctggaaagggctaccggagaaggtgaaagtcctgtaagcgaaaggagtacataacttatattcttgagtagggcggaactcgtgaaattccgtct…
>CPR_PB1_Magasanikbacteria_GCA_001784475.1
cgcaatttcaacaagggcacacggtggatgccttgacactaaaagacgatgaaggacgttgcagggtgcgataagtctcggggaggtcccaagctcctttg-atccgggaatttccgaatggggaaaccctctgtcgtaaga-caga-atcgtatactgaatacataggtatacgaagaagacctggtgaagtgaaacatctcagtaaccagaggaaaataaattga--aagattcccttagtagtggcgagcgaaaagggagcagcctaaaccgaa--aatt-aacattcctagtagaagtctctggaaagagccgccaaagcgggtgatagccccttacgcgaaaggagttcatagtttatattcttgagtagggcggaactcgtgaaattccgttt…
>CPR_PB1_Magasanikbacteria_GCA_000990355.1
----gcatctttaagagcatatggtggatgcctagacactgtaggtcgatgaaggacgtagcaacctgcgataagccccggggaggtggtaagcacctttg-atccgaggatttccgaatgggggaaccctcccgatacgaatcgggaacttcatactgaattcataggtatgtagagagcacctggtgaagtgaaacatctcagtaaccagaggaacaaaaagaaacttcgattccctaagtagtggcgagcga
>CPR_PB1_Magasanikbacteria_GCA_001783065.1
----acgcaaataagggcgtatggtggatgccttgacactaagagacgatgaaggacgttgcagggtgcgataagcctcggttaggtcccaagcacctttg-acccggggatgtccgaatgggggaaccccgccgactttac-cggtgattacgcgctgaattcataggcgcgtaaagaagacctggtgaagtgaaacatctcagtaaccagaggaaaagaaaacgaatgtgattccctaagtagtggcgagcga
>CPR_PB1_Magasanikbacteria_GCA_001783045.1
cgca----ataaaagagcgtacggtggatgcctcgacacgaaatgacgatgaaggacgttgcagggtgcgaaaagcctcggtgagatcccaagcatctttg-acccggggatgtccgaatggggaaacccctccgatgtaattcggagatcgtgcactgaattcataggtgcatgaagaagacctggtgaagtgaaacatctcagtagccagaggaaaagaagacaattgtgattcccttagtagtggcgagcgaacggggaagagcctaaaccttt-gatga-atcttgtatagtcgaagagcctggaaaggcacatcatagaaggtgataatcctgtagacaaaatacgtcaagaggttgtatccctgagtagggcggaacacgtgaaattccgtct…
>CPR_PB1_Magasanikbacteria_GCA_001782905.1
----acgtaagtaagagcgtacggtggatgccttgacattgtctcccgatgaaggacgttgcagggtgcgataagccccggggaggtcccaagcacctttg-atccgaggatgtccgaatgggggaacccatccagcaccacctggatactgcatgatgaatacatagtcatgcagagaagacctggcgaagtgaaacatctcagtagccagaggaaaagaaaacaa--gtgattccgtcagtagtggcgagcga
>CPR_PB1_Magasanikbacteria_GCA_001782875.1
cgca----atacaagagcgtacggtggatgccttgatactattgaacgatgaaggacgtagcaatctgcgataagcttcggttaggtgataagcacctttg-acccggagatttccgaatgggggaacccaattccggtaatggaattatt---tctatgattaacgtcatagagaagaagacctggtgaagtgaaacatctcagtaaccagaggaaaagaaaacgaatgtgattccctaagtagtggcgagcgaaaggggaacagtctaaacttta---tat-attttttatagttaaatttcctggaaaggaaaaccaaagaaggtgatagtcctgtagacgaaataatttgtatagttgtattcttgagtacggcggaacacgtgaaattccgtcg…
>CPR_PB1_Magasanikbacteria_GCA_001784365.1
cgca----atataagagcgtacggtgaatgccttgatactattgaacgaagaaggacgtagcaatctgcgataagcttcggtgaggtgataagcacctttg-acccggagatttccgaatgggggaacccagtttcgatgaatcgaa-attatttctatgattaacgtcatagagaagaagacctggtgaagtgaaacatctcagtagccagaggaaaagaaaacgaatgtgattcccttagtagtggcgagcgaaaggggaagagtctaaacctta-aa----gttatttatagttgaatttcctggaaaggaaaaccaaagacggtgatagtcccgtaaacgaaatttattatattgttgtattcttaagtacggcggaacacgagaaattccgtcg…
>CPR_PB1_Magasanikbacteria_GCA_000999365.1
cgca----atataagggcgtacggtggatgcctagacactattcaacgaagaaggacgtcgcagggtgcgataagcctcggggaggtcccaagcacctttg-atccggggatttccgaatgggggaacccatgtcgcgtaattgacatactgtacagtgaatacatagctgtatggagaagacctggtgaagtgaaacatctcagtagccagaggaataaaaagaaaattcgattcccttagtagtggcgaacgaacggggaacagcccaaaccaca-aaaac-gtcttgtatagtcgaagctcctggaacggagcaccatagcgggtgatagtcccgtagacgaaatacggttgtataggtttatcctgagtacggcggagcacgtgaaactccgtcg…
>CPR_otherPB_Moranbacteria_GCA_016699975.1
----gcgtta-ctaacgcgcatggtggatgccttgactttgaagagcgatgaaggacgtagtaggctgcgataagcctcggggagctgccaaacagctttg-atccggggatctccgaatgggacaacccatcccgctttg-gggat-atctacatctgaatacataggatgatgaagcgcacccggggaactgaaacatcttagtacccggaggaaaagacatt-------attccgtgagtagtggcgagcga
>CPR_otherPB_Moranbacteria_GCA_016699875.1
----gcgtta-cacatgcgcatggtggatgcctagacttgaacaagcgatgaaggacgtagcaggctgcgataagcctcggggagtcgccaagcaactttg-atccggggatttccgaatgggacaacccaactccgcataaggagttatccgcatccgaatacataggatggtggagcgcacccggggaactgaaacatcttagtacccggaggaagagacatcaat-gagattccgtcagtagtggcgagcga
>CPR_otherPB_Moranbacteria_GCA_016699795.1
----aagtt-gcgagggcgtacggaggatgccttggctgaagtaagcgatgaaggacgtgaaagactgcgataagcctcggggagctgtcaaatagctttg-atccgtggatttccgaatggggtaacccttgcc--t-ta--ggcaaaccgtcatctgaatacataggatgatgtggcaaactcggggaattgaaacatcttagtacccgaaggaatagaaaacaat-gtgattccgtaagtagtggcgagcga
>CPR_otherPB_Moranbacteria_GCA_016699425.1
aaagcagtt-accaacgcagagtgtggatgccttgacttatgcaagcgacgaaggacgtaggaggctgcgaaaagccccggggagctgtcaaccagctgtg-atccgaggatatccgaatggggcaaccctctggtagcaatcggaa----ctagtctgaatacatagggctaccgagcaaacccagtgaattgaaacatcttagtagctggaggaaaagaaattaat-aagattccgtcagtagtggcgagcgaacgcggaagagcctaaaccatc--cagt-acaatcgttaggagaaggttctggaaaggaccaccacagggggtaatagtcccgtatccgaaaacgatttgatgcatcagttcctaagtagggcggggccggagaaaccccgttt…
>CPR_otherPB_Moranbacteria_GCA_000995125.1
----gag-taactaatgcatatggcggatgccttgacattaaaaagcgatgaaggacgtagctggctgcgataagcttcggggaagtgctaagcacttttg-atccggagatttccgaatgggataaccccctcttttagag------atccataactgaatacataggttatggaagcgcaccctgggaactgaaacatcttagtaccaggaggaatataaatcaat-gagattccgtgagtagtggcgagcga
>CPR_otherPB_Moranbacteria_GCA_001003855.1
tgaaaggttacttaatgcatatggtggatgccttgactgaagtaagcgatgaaggacgcagcaggctgcgataaacctcggggagctgtcaagcagctttg-agccgggggtttccgaatggggcaaccctacgtcttcgg--acgtaatctctgactgaatcaataggtcagagaagcagaccctgggaattgaaacatcttagtaccaggaggaaaagaaaacaat-gtgattccgcaagtagtggcgagcgaacgcggaatagtctaaaccgta--tgtcatgttcccttagcaaaatcctttggaaagaggaaccatagcgggtaatagtcccgtatgtgaaaagcgacagatgagactatcctcaagtagggcgggaccggtgaaatcccgtct…
>CPR_otherPB_Moranbacteria_GCA_001784735.1
aagaaggt-acttaacgcatggtgtggatgccttgactgaagcaagcgatgaaggacgtaggaggctgcgataagcctcggggagctgtcaaccagctttg-atccggggatttccgaatggggcaacccagtcgt-tgtatcgagctatcctgatttgaatacatagaatggaatagcagaccctgggaactgaaacatcttagtaccaggaggaaaagaaatcaa--gagattccgcaagtagtggcgagcgaacgcggagaagcctaaaccccc--cagcc-tattttttaggagaagtgcctggaaaggcacatcacagaaggtaataatcctgtatccgaaaaaaaatgggtgcacaagttcctaagtagggcggggccggagaaaccccgttt…
>CPR_otherPB_Moranbacteria_GCA_001873875.1
aaggaggttacttaacgcatggtgtggatgccttgactgaagcaagcgatgaaggacgtaggaggctgcgataagccccggggagctgtcaaccagctttg-atccgaggatttccgaatgaggcaactctctcactttta-gagaa-acc-gtatctgaatacatagggtacggtagcgcaccctgggaattgaaacatcttagtaccaggaggaaaagaaattaat-aagattccgtaagtagtggcgagcgaacgcggaatagcctaaaccatc------tatttttgttagcaaaatgttttggaaagaacaaccaaagagggtaatagtcccgtatgtgaaaacaaaacgatgtataggtacctaagtagggcggggctggagaaaccccgttt…
>CPR_otherPB_Portnoybacteria_GCA_001819435.1
aagcaggtactcaagggtatatggtgaatgccttgggatattggggcgatgaaggacgtggcgagctgcgataagcctcggggaggtgtgtagcacctttg-atccggggatttccgaatggggaaacccaatctcgtaaatgggattagtcccgtcgaa----------tgggacagcgaactcggcgaagtaaaacatttcagtagccggaggaaaagagaaagaa--ttattcccttagtagcggcgagcgaaaagggaagagcctaaacctaa--aaaattacttccttagtcgaactggctggaaagcctgaccacagtgggtaatagtcctttaggcgaaaagggttccttgtcattattcttaagtacggcgagaaac-gataatcttgtcg…
>CPR_otherPB_Portnoybacteria_GCA_001872305.1
aagaaaat-aataagggcgtatggtgaatgccttgacgtcaagagccgatgaaggacgtggcggtctgcgataagccccggtgaggtgacaagcgcctttg-acccggggatgtccgaatgtggcaacacaacgtag-gca-catgttatg-tg-----------caa--gacacatgggtacccgctgaagtgaaccatctcagtaagcggaggaaaataaaacaat-gaaattccccaagtagcggcgagcgaaaagggaacagcccagagttta--aaaa--acttgtctaaccaaagtctctggaaagagccgccatagcgggtaatagccccgtaggtaaaagatgtatcttggttattttcttgagtaccttgggacaa-gattatcccatgg…
>CPR_otherPB_Portnoybacteria_GCA_001819555.1
ttaaatataatcaagggcaaatggtggatgcctcgacatcaaaagacgatgaaggacgtagcagcctgcgaaaagcttcggtgaggtggcaagcacctttg-acccggagatatccgaatggggaaacccgtcttgatggaacaagacatcattatctgaatccataggataatgaagaagacctggcgaagtgaaacatctcagtagccagaggaaaagaaaaaaat-gtcattccctgagtagtggcgagcgaaaggggaagagctcaaattcca--caaattatttccctagccaaagcttttggaaagaagcgccaaagaaggtgacagccctgtcggcgaaagggattttgcagtgtttatcttgagtaccacggaactcgtgaaattctgtgg…
>CPR_otherPB_Portnoybacteria_GCA_001819605.1
gggataaatattaagggcttatgaaggatgccttgacataaagagccgatgaaggacgtggcggactgcgataagcctcggggaggtgtctagcacctttg-atccggggatgtccgaatggggaaacccagcgcaatcaaatgcgttacgcgcgttttcgcatataa--ggcgcgagggaacccgccgaagtgaaacatctcagtaagcggaggaaaagaaaaaaatcaaaattccccaagtagcggcgagcgaaaagggaagagcctaaaccgta--taaaataattggttagttgaattttttggaaaaaagaaccaaagagggtaatagtcccgtagatgaaaacttctcctaattattattcttaagtaccatgggacca-gactatcccatgg…
>CPR_otherPB_Portnoybacteria_GCA_000997475.1
tgaggcaagtctaagggcgtatggtggatgccttgggatattgaggcgatgaagggcgtggcggactgcgataagtcccggtgaggtgtctagcacctttg-acccgggaatttccgaatggggaaaccctattgcgcaaacgcaataacttcgcctcgagattaatc--ggcgagcgcaaacccgctgaagtaaaacattctagtaagcggaggaaaagaaaaaacaatccattcccttagtagtggcgagcgaaaagggaagagcccaaacccca--aagattatcctgttagcagaatcgaatggaaagcggaaccaaagagggtaatagtcccgtaagcgaaaacagttcccggttatcaatcttgagtacggcgaggaacgaacgc-cttgtcg…
>CPR_otherPB_Azambacteria_GCA_001002715.1
ggacaggttattaagagcctatggtggatgccttgacacaaagaggcgatgaaggacgcggcgggctgcgataagcctcggggaggtgcttagcacctttg-atccggggatttccgaatggggcaacccgtctc-gcaaatgggac-atctttcgagtaac--------ggaagaagcgaacccggggaagtgaaacatctcagtacccggaggaaaagaaaaaa-aaattattcccttagtagcggcgagcgaaaagggaagagcctaaacccaa--aaaac-aaacggttaattaaactccctggaaagggcgaccaaagagggtaatagtcccgtaaatgaaaattgttctcagtcattgttcttaagtaccgcggggaac-gacagccccgtgg…
>CPR_otherPB_Azambacteria_GCA_001774085.1
----ggg-aa--aagagtatacggtggatgccttgacataaagaagcgatgaaggacgtggcgaactgcgataagctccggggaggtgttcagcacctttg-atccggagatgtccgaatggggaaaccccgtgccgtaaccggcatgactgtgctatgaaaat------acgcagagcgtacccagtgaagtgaaacatctcagtaactggaggaaaagaaaaaaactaccattcccttagtagcggcgagcga
>CPR_otherPB_Azambacteria_GCA_001773975.1
----cgggaattaagagtatatggaggatgcctagacataaagaagcgatgaaggacgtggcggactgcgataaactccggggaagtgtcaagcacttgtg-atccggaggtgtccgaatgaggaaactcatctcgacaaaccgagataccctgcttgtaatagacag--gacgggggcgtacccagtgaagtgaaacatctcagtaactggaggaaaagaaaaaaatgtatattcccttagtagcggcgagcga
>CPR_otherPB_Azambacteria_GCA_001774135.1
gagtaggttactaagggcgtatggtggatgccttggcacaaaaaggcgatgaaggacgtggcggactgcgataagcgtcggggagctgtctagcggctttg-atccggcgatgtccgaatgggaaaacctatagcgat-aatcgctatatcttctccgtaag--------tgaagatgcaaacccagggaagtgaaacatctcagtacctggaggaaaagaaaaaaatt-tcattctcctagtagcggcgagcgaaaagggaacagcccaaaccacg--cgaa----aaggttaattaaatgttttggaacagccagccaaagagggtaatagccccgtaaatgaaaatcttttcttgatcgttctcttgagtaccgcggggaaa-gactgccccgtgg…
>CPR_otherPB_Azambacteria_GCA_000995795.1
gaataggttattaagggcgtatggaggatgccttggcacaaaaaggcgatgaaggacgcggcagactgcgataagcgtcggggagccgtctagcggctttg-atccggcggtgtccgaatggggcaacccatggcgat-aatcgccatatcttttccgtaag--------taaaggagcaaacccggggaagtaaaacatttcagtacccggaggaaaagaaaaaaagtaatattcccccagtagcggcgagcgaaaagggaggagtccaaaccctaggcgaaa-aattgattagttgaacgttttggaaaagccgaccaaagggggtaatagtcccgtaagcgaaaatctttttctggttattttcttgagtaccgcggggaaa-gactgccccgcgg…
>CPR_otherPB_Yanofskybacteria_GCA_000397985.1
ttgtgaacaattaagggcagttggtggatgccttgacttaaaaggccgatgaaggacgtggcgagctgcgataagcctcggggaggtgcctagcacctttg-atccggggatgtccgaatggggaaaccccgtcccgagcaagggatgatcctgtggttg-----taa--tcaggatggtaacccgctgaagtgaaacatctcagtaagcggaggaaaagaaaaaa--agtcattccctgagtagcggcgagcgaaatgggaacagctcaaaccaaa--cagaa---tttgttagttgaaccccctggaacgggcggccaaagaaggtgatagccctgtaagcgaaaatttatctttg-acttatacttgagtaatccgaggaac-gacaacttcggat…
>CPR_otherPB_Yanofskybacteria_GCA_001824315.1
----gaccaa--aacggcatatggaggatgccttgacatcaagaagcgatgaaggacgcggcggactgcgataagtctcggggaaccgtctagcagtgttg-atccgggaatttccgaatggggcaacccaattgagtaaa-tcaattatct--actcaaat--a-----agcggatgcagacccgctgaagtgaaacatctcagtaagcggaggaagagaaaacaaaaaccattccccaagtagcggcgagtga
>CPR_otherPB_Yanofskybacteria_GCA_001794605.1
----aaggaatgaagggcgtatggaggatgccttgacactaaaaggcgatgaaggacgtggcggactgcgataaacttcggggagccgtctagcggctttg-atccggaggtgtccgaatggggaaacccaatttggtgaaacaaattaccccatgccgagtgca-----gacggtggcgtacctggggaagtgaaacatctcagtacccagaggaaaataaat-aa--tagattccgtcagtagcggcgagcga
>CPR_otherPB_Yanofskybacteria_GCA_001795795.1
----aaa-caataagggcgtacggaggatgccttgacactaaaaggcgatgaaggtcgtggcggactgcgataagcctcggggagccgtctagcggctttg-atccggggatgaccgaatggggaaaccccacgcggtaaaccgcgttgctctgaactgaatatataaaagcgcgtagcgtacctggggaagtgaaacatctcagtacccagaggaaaataaatcaa--gagattccgtcagtagcggcgagcga
>CPR_otherPB_Yanofskybacteria_GCA_001794275.1
gattactt-aataagggcgcacggaggatgccttgacacaaaatggcgatgaaggacgttgcggactgcgataagcgtcggggagccgtcgagcagctttg-atccggcgatgtccgaatgggaaaaccccgcggtgtaaaccccgt-accc--gcttaagtacataggcggcgggggcgtacctggggaagtgaaacatctcagtacccagaggaaaagaaatagaa--agataccgttagtagcggcgagcgaaaacggcgaagcctaaacttta--aaaattcgagcggtagcagaacgccttggaatagccggccacagcgggtgacagccccgtacgcgaaaccaatcgcaagctcctttacttgagtagcccaggataa-gaatgtccggggt…
>CPR_otherPB_Yanofskybacteria_GCA_001795815.1
taagaaacaattaagagcatacggtggatgcctagactctaagaggcgatgaaggacgtagcaagctgcgataagcttcggggaggtgccaagcacctttg-atccggagatctccgaatgaggaaactcatcccgg-aagagggat-atcttatccgcaag--------tagagaagcgaacccagggaagtgaaacatctcagtacctggaggaaaataaactaa--agtattcccctagtagcggcgagcgaaaagggagaagcccagagc-ta--acaatcacgtctgtagccgagtgcgttggaaagcgcaatcacagagggtaacaatcccgtaggcgaaacaggcactttggtgagtaccttgagtacctcgggacat-gactggcctgagg…
>CPR_PB2_Terrybacteria_GCA_001822905.1
ggagccaaaagtaagagcatatggtggatgccttgacataaatggcctacgaaggacgcggcgggctgcgataagcctcgggaaggtgctgagcacctacg-atccggggatttccgaatggggcaacctaatttgctaaa-aaatttatctggccttaa----------ccagatagggaactcggcgaagcgaaacctcacagtagccggaggaaaataaaagaagaatcattccctgagtagcggtgagcgaaaagggaacagtccaaaccata--aaagttagttagttagctgaatgc-ctggaaaggccgaccaaagagggcaatcgtcccgtaagcgaaaattaattcttgtttttattcttgagtagcccggaaaat-gaaagttccgggt…
>CPR_PB2_Terrybacteria_GCA_001822895.1
ggagccaaaaataagagcatatggtggatgcctcgacataaatagcctatgaaggacgcggcgggctgcgataagcctcgggaaggtgctgagcacctatg-atccggggatttccgaatggggtaacctaatttggtaag--aaattatc-tggccgcaa---------ctggatcgggaactcggcgaagcgaaacctcacagtagccggaggaaaagaaaagaaag-acattcccttagtagcggtgagcgaacagggagtagtccaaacctta------ttagttacttagtagaa-actctggaaagagtcaccaaagagggtaacagtcccgtaaatgaaaattaattcttgtctttattcttgagtagcccggggaaa-gaaagccccgggt…
>CPR_PB2_Terrybacteria_GCA_000993875.1
taatagg--aataagggcgtatggtggatgcctagacttaaagagacgatgaaggacgtggctagctacgataagcttcggggaggcgctgagcgcctttg-atccggagatctccgaatggggaaacccaacaccgtaaatggtgttatcccg----------------gcgggaaggaaaccccgggaagtgaaacatctcagtaccgggaggaaaagaaaacaa--gtgattccctgagtagcggcgagcgaaatgggaatagcctaaaccttt-------tatcttgttagctgaa-ccgttggaaagcggagccaaagaaggtaatagccctgtaaacgaaaacatgtttcagttattattcttaagtacttcgagacac-gaatggctcggag…
>CPR_PB2_Spechtbacteria_GCA_001820015.1
----tacaacaaaagagcatatggaggatgccttgacaccaaaagtggatgaaggacgtggcgagctgcgataagctccgggaaggtgtgtagcacctgtg-atccggagatttccgaatggggaaacccacctgcgcaaa-gcaggtaccctgcgttaagc--------cagtggacataacccgccgaagtaaaacatttcagtaagcggaggaaaagaaaactatg-acattcccttagtagcggcgagcga
>CPR_PB2_Spechtbacteria_GCA_001820055.1
----taaaactcaagggcatatggaggatgccttgacaccaaaaggggaagaaggacgtggtgagctgcgaaaagcctcgggtaggtgcgtagcacctttg-atccggggatatccgaatgaggaaactcgatgcggcaaa-cgcatcaccctgcgtaagac----------atggaccgtacccgctgaagtgaaacatcttagtaagcggaggaaaaatataccgtcggtattcccttagtagcggcgagcga
>CPR_PB2_Wildermuthbacteria_GCA_001824885.1
gaaaaaataattacgggtggacggtggatgccttgggatatcgaggcgatgaaggacgtggcggcctgcgataagcttgggtgaggtggcgagcacctttg-accccaagatttccgaatgcgtaaacgcggttccgtaaaaggaatcacccggcccataag--------ttagggagcaaacccgctgaagcgaaacatcatagtaagcggaggaaaagaaaaca-agaccattcccttagtagcggcgagcgaagagggaacagcccaaacctta-gtaaa--ggttggttaggggaaaaccctggaaaggggtaccaaagagggtaatagtcccgtacctaaaaatccctccttgatacttttcttgagtacctcgagggaa-gataaccttgagg…
>CPR_PB2_Nealsonbacteria_GCA_001819335.1
aatattgcatttacgagctgacggcggatgccttggaatatcgaggcgatgaaggacgtgggggtctgcgataagcttcggggaggtgactctcacctttg-atccggagatttccgaatgggtaaacctgtcccggtgagtgggacg---ctggcacgt-----gat--gcacggagcaaacccgctgaagtaaaacattccagtaagcggaggaaaataaaatgaa---tattcccccagtagcggcgagcgaagagggagaagcttaaacccta--ggtgaggcttcgttagttgaactccctggaaagggcgaccaaagagggtaatagtcccgtaagcgaaaacggctccttgatacttttcttaagtacttcgagacac-gaaaatcttgaag…
>CPR_PB2_Nealsonbacteria_GCA_000992685.1
--aattaaatttacaggcgaatggtggatgccttgggatatcgaggcgaagaagggcgtggcggactgcgataagctccggggaggtgtctagcacctttg-atccggagatttccgaatggggaaacccatcccgagaaagcgggatacccggccgttaa---------atagggagcgaacccgctgaagtgaaacatctcagtaagcggaggaaaagaaaaaaaccaatattcccttagtagtggcgagcga
>CPR_PB2_Nealsonbacteria_GCA_001819175.1
caactaaattttaagagcaaatggtggatgccttgggatattgaggcgatgaaggacgtggcggactgcgataatcctcggagaggtgtctagcacctttg-acccgggggtttccgaatgggaaaacccaatctcgtaaaagggattaaccctatttta----------cagggtggcaaacccgctgaagtgaaacatctcagtaagcggaggaaaagaaaaataa--ttattcccttaatagcggcgagcgaaaagggaagagcccaaaccatt--tagagagattagttaggagaacaccctggaaagggcggccaaagaaggtaatagccccgtaatcgaaaacttctccttgttatcttacttgagtactatgggaaat-gaaagtcctgtag…
>CPR_PB2_Nealsonbacteria_GCA_001821555.1
taaagtaattttaagggcaggtggaggatgccttgggatattgaggcgatgaagggcgtggcggactgcgataagcctcggggaggtgtctagcacctttg-atccgaggatttccgaatggggaaacccaatgtggcaaaccgcattactccgtgcaaa----------tcggagagcgaacccgccgaagtgaaacatctcagtaagcggaggaaaagaaaaataa--tcattcccttagtagcggcgagcgaagagggagaagctcaaactc--aagagaataaggagttagaagaacgccctggaaagggcggccatagaaggtaatagccctgtattttaaaacttccccttgcagtctctcttgagtatctcgggaaaa-gatagccccgaga…
>CPR_PB2_Nealsonbacteria_GCA_001821455.1
----agaaatttaagagcggatggtggatgccttgggagattgaggcgatgaaggacgtggcggactgcgataatcctcggggaggtgtctagcacctttg-atccgggggcttccaaatggggaaacccaatcccgttaatgggattatcccg----------------gcgggaagcaaacccgctgaagtgaaacatcccagtaagcggaggaaaatagaacaat--ttattcccttagtagcggcgagcga
>CPR_PB2_Staskawiczbacteria_GCA_001872225.1
aaagaggt-attatgggcaaatggtggatgccttgggagcaggaggcgatgaaggacgtggcgggctgcgataagcttcggcgaggtgcttagcacctatg-acccggagatctccgaatgtggaaacactttgcggcaaaccgcaa-acc-ca----------acaa--gatgggggcgaacccagcgaagtgaaacatcttagtagctggaggaaaagaaaaaaaa-aatattccccaagtagcggcgagcgaaaagggatgggcctaaaccaca-aaaaatc-tttggttagctgaatcccctggaaagggcgggcagagaaggtgatacccctgtaagcgaaaaccagtcctgattattattcctgagtaccttagggaaa-gaaagccctgagg…
>CPR_PB2_Staskawiczbacteria_GCA_001820485.1
agaaaat--attatatgcgaatggtggatgccttgggatattgaggcgatgaaagacgtggcggcctgcgataagcttcggggaggtggctagcacctttg-atccggagatttctgaatgaggaaactctacagtgttaatagagttatcctgttctaaattcataagggacagaagctaacccggtgaagtgaaacatctcagtagccggaggaaaataaaaaaatag-cattcccttattagtggcgagcgaaaagggaacagtctaaaccataagtaaa----agggttaaaagaagactctggaaagaggcgccataggaggtaatagccctgtatttaaaaattcttccttgttaagtttcttaagtactgtcgggaat-gataacccggcag…
>CPR_PB2_Staskawiczbacteria_GCA_001822075.1
----aggc-attataagcgaatggcggatgccttgggatattgatgcgatgaaggacgtggcggcctgcgataagcatcggggaggtggctagcacctttg-atccggtgatttccgaatgaggaaactcaatatgattaattatattatcccattttgtac--ataa--gacagaagcgtacccggcgaagtgaaacatctcagtagccggaggaaaagagaacaa--gttatccccttagtagtggcgagcga
>CPR_PB3_Jorgensenbacteria_GCA_001872485.1
----gcataaataagagcaagtggtggatgccttgggttgaagaggcgatgaaggacgtggtagactgcgaaaagcttcggggagccgtctagcggctttg-atccggagatgtccgaatggggaaacctatgagcgcaaatcaaattattccattccaaatatatagatgcgaggagcgtacctcgggaagtaaaacatttcagtaccgagaggaaaagaaaacaaggggtattcccgtagtagtggcgagcga
>CPR_PB3_Jorgensenbacteria_GCA_001824435.1
----taataaataagggcatatggtggatgccttgacttgagaaggcgatgaaggacgtggcgggctgcgataagcttcggggaggcgcttagcacctatg-atccggagatttccgaatggggaacccccgccgtgcaaaccaagttatcccacttcgaat--acaggcgc-ggcggcgtacccgctgaattgaaacatcttagtaagcggaggaaaagaaaccaacagtcattcccttagtagcggcgagcga
>CPR_PB3_Jorgensenbacteria_GCA_001779575.1
tagagaattattaagggtgtatggtggatgccttgacgcaaagcggcgatgaaggacgtagcgagctgcgataagcctcggtgaggtgcctagcacctttg-acccggggatttccgaatggggaaacctatttgcgtaaaagcaaatggcctttctataaa--------cgaggcagcttacccgctgaagtgaaacatctcagtaagcggaggagtagaaaaaaatcaaaattcccttagtagcggcgagcgaaacgggaagagcctaaaccata--caaatttgttggctagtcgaa-ctgctggaaagcagcgccaaagaaagtgaaagccttgtagacaaaagtcggcttaaatttttgttcttgagtacctcgaggcta-gacaacctcgagg…
>CPR_PB3_Jorgensenbacteria_GCA_001781035.1
----aagaagttaagggtaggtggtggatgccttgacaccaaatggcgatgaaggacgtggcgaactgcgataagcttcggggaggtgtgtagcacctttg-atccggagatttccgaatgggaaaaccctgccgtgtaaa-gcggt-accctataataaatttatagaacagtggagcgcacccagggaactgaaacatctaagtacctggtggaaaagagacaaat--gtattccccaagtagcggcgagcga
>CPR_PB3_Jorgensenbacteria_GCA_001779505.1
agaaatgggac-agcggtaaacggtggatgccttgacatcatgcagcgaagaagggcgtggcgagctgcgataagccccgggtaggtgtgtagcacctgcg-atccggggattcccgaatggggaaacccgatgctgtgaacagcatcgcgctccgcttg----------ggagcgcgcagacccggtgaagtgaaacatctcagtaaccggaggaaaagaaatcaag-gagattcccttattagtggcgagcgaacggggaagtgcctaaaccc----cgga----aacgatagccgaa-actctggaaagagtcaccacagaaggtgacagtcctgtaggcgaaatcggacggggtgctcggttcctaagtacttcgagaaca-gaaagtctcgagg…
>CPR_PB3_Jorgensenbacteria_GCA_001004105.1
aatcacttaaataagggtagatggcggatgccttgacactaaacggcgaagaaggacgtggcgagctgcgataagtctcggggaggtgcgtagcacctttg-atccgggaatgtccgaatggggaaacctggtagagcaaactctatcgcttcacacgct----------ttgaagagcgcacccagggaactgaaacatctaagtacctggaggagtagagaataat--ttattccctaagtagcggcgagcgaaaagggaagagcctaaacctta--caaaatgatttgctagccgaa-ctcctggaaaggagaaccacagcgggtgatagtcccgtaagcgaaagtgaatctaatattttattcttaagtaccgcgaggcca-ataaacctcgtgg…
>CPR_PB3_Jorgensenbacteria_GCA_001001265.1
ggaaaagcacgtaagggtggatggtggatgccttgacacttaatggcgatgaaggacgtggcgaactgcgataatcctcgggtaggcgtgtagcacctgtg-atccgggggtctccgaatggggaaacctaatatcgaaaacggtattgtcccgcgtttag---------tcgggaagcgcacccgctgaattgaaacatcttagtaagcggaggaaaagaaaaaaaaaaacattccccaagtagcggcgagcgaaaagggagtagcctaaacttta--taaattgctttgttagcggaa-ttgctggaacgcaacacgaaaaagggcgatcgtcccgtacgcgaaaacggaaatttttttctgttcttgagtacctcgaggcaa-caataccacgagg…
>CPR_PB3_Jorgensenbacteria_GCA_001779535.1
gaagaagcacgtaagggtggatggaggatgccttggcattaaatggcgacgaaggacgcggcgagcggcgatactcttcgggtaggtgcgtagcacctgtg-atccggagatgtccgaatggggaaaccctctgcggaaaaccgcagaaccctgtttgtaatatgtagaccgttggagcgcacctggtgaagtgaaacatctcagtaaccagaggaaaataaaacaagaaagattccctgagtagcggcgagcgaaacgggagaagcctaaaccata--caaatcgcttggttagccgaa-ttattggaacgtaacaccaaagagggcgaacgtcccgtaggcgaaaaccataatttttttctgttcttaagtacctcgaggcca-aaataccacgagg…
>CPR_PB3_Wolfebacteria_GCA_001793775.1
ttgaggttaactaagggcgtatggtggatgccttgacactaaatggcgacgaaggacgcggcgaactgcgataagcctcggggaggtgtgtagcaccttta-atccggggatttccgaatggggcaacccaattgtgtaaacacaattaccccgctagaa----------cgtgggcgcgaacccgctgaagtgaaacatctcattaagcggaggaaaacaaaaaaaca-ctattcccccagtagcggcgagcgaaaagggagaagtctaaacccta--caaattcttttgttagccgaa-tccctgggaagggataccaaagaaggtgaaagtcctgtaggcgaaaacaaatcctagtatgtgtccttaaataccccgacgaac-gaaagcttcgggg…
>CPR_PB3_Wolfebacteria_GCA_001793865.1
aagtggttaagtaagggcgtatggtggatgccttggcattatgtggcgatgaaggacgtggcgagctgcgataagcttcggggaggtgtgtagcacctttg-atccggagatgtccgaatggggaaaccctgcacggcaaaccgtgtaatcttatcagtaat--------ttaagaagcgaacctgctgaagtgaaacatctcagtaagcagaggaacaaagaacgaa--atattccctaagtagcggcgagcgaaatgggaagagcccaaacctta--caaatttttgcgctagccaaatccgctggaaagcggaaccagagagggcgaacgtcccgtaggcgaaagcgtgctttagtatgtattcttgagtacctcgaggaat-gaaagcctcgtgg…
>CPR_PB3_Wolfebacteria_GCA_000996445.1
tagaagtaatttaagggcgtatggtggatgccttgacatcaaacagcgatgaaggacgtggcgagctgcgataagcttcggggaggcgcctagcacctgtg-atccggagatttccgaatggggaaacctaatacagtaaactgtattactccgcattaa----------tcggagtgtgcacccgctgaagtgaaacatctcagtaagcggcggaaaagagaaaaa---ttattcccttagtagcggcgagtgaaaagggaagagcccaaaccata--caaatttatttgttagccgaa-ccgctggaaagcggaaccatagcgggtgaaagtcccgtaggcgaaaacgaactttagtttctattcttgagtacctcgaggaca-gaatgcttcgagg…
>CPR_PB3_Wolfebacteria_GCA_001793895.1
-------aaagtaagggcgtatggaggatgccttgactaagaaaggcgatgaaggacgcggcgaactgcgataagcttcggggaggtgtgtagcacctttg-atccggagatttccgaatggggaaacccaatacagcaaactgtattacccgacacttg----------gccgggagcgcacccgctgaagtgaaacatctcagtaagcggaggagtagagaacaaa--taattccctgagtagcggcgagcga
>CPR_PB3_Harrisonbacteria_GCA_001002005.1
----gataaattaagggcgtatggtggatgccttgacatcaaaaagcgatgaaggacgcggcgagctgcgataagcttcggggaggagcgtagcacctatg-atccggagatttccgaatggggaaacctttttgcgtaaa-gcaaaagctccgaccgtaag--------tggagcagcatacccggcgaagtgaaacatctcagtagccggaggaacagagaaaaac--ttattctcttagtagcggcgagcga
>CPR_PB3_Harrisonbacteria_GCA_001817925.1
----atgccactatgggcgtatggtggatgccttgacatcacgtggcgatgaaggacgcggcgagctgcgataagtctcggggaggtgcctagcacctacg-atccgggaatctccgaatgggaaaacccatcccgataaa-cgggagatcctactcttga---------ttaggatgcgcacccagggaagtgaaacatctcagtacctggaggaaaataaaacaat--gtattcccttagtagcggcgagcga
>CPR_PB3_Harrisonbacteria_GCA_001817915.1
----gatt-gataagggcatatggtggatgccttggcatcaagtggcgatgaaggacgtggcgagctgcgataagcctcggggaggtgcctagcacctttg-atccggggatttccgaatggggaaaccctctgtgataaaccaaaa-atttcgaaccaaatgtataaggtcacggagtatacccgctgaagtgaaacatctcagtaagcggaggaaaataaaaaaat-ggcattccctgagtagcggcgagcga
>CPR_PB3_Harrisonbacteria_GCA_001817935.1
tgagggcgtaataagagcgtatggtggatgccttgacacaaaatggcgatgaaggacgtagcgagctgcgaaaagccccggggaggtgtgtagcacctttg-atccgaggatatccgaatggggaaaccctttggcgtaaacgccaaaagtccc-aactt------gt--cgggacagcatacccgctgaagtgaaacttctcagtaagcggaggaaaagagaaaaat----attccgttagtagcggcgagcgaaaccggaacagcccaaacttta--taaattgatttgctagttgaat-ggatggaaagcccaaccagagcaggtgatagtcctatagacgaaagcaaatct--gtttttattcttaagtaccccgaggcca-ataaaccttgagg…
>CPR_PB3_Liptonbacteria_GCA_001821375.1
gatggtcggaaaaagggcgtacggtggatgccttgacactaaagagcgatgaaggacgcggcgagcggcgatacgcctcggggaggtgcgtagcacctatg-atccggggatttccgaatgaggaaactctattacgtaaa-gtaataactctg----------------ccggagagcgaacccgctgaagtgaaacatctcagtaagcggcggaaaataaaacaac--tgattccccaagtagcggcgagcgaaaagggaacagcctaaaccata--taaattcgtttgttagccaaacgtgctggaaagccgggctaaagaaggtgaaagccctgtaggcgaaaacaa-ttttagtatttattcttaagtacttcgataaaa-gaaaacgtcggag…
>CPR_PB3_Liptonbacteria_GCA_001818575.1
----atgtcattaagggcgcatggtggatgcctagacatcaaacgacgacgaaggacgcagcaagcggcgatacgccacggtgaggtgcggagcaccgttg-acccgtggatttccgaatggggcaaccctgttgagtaaactcaacaaccttc----------------gaaggagtcacacccgctgaagtaaaacatttcagtaagcggtggaaacgaaaaaaagaaaaattccccaagtagcggcgagcga
>CPR_PB3_Liptonbacteria_GCA_001818655.1
gatggttggcataagggcgaatggtggatgcctagacatcaaaaggcgacgaaggacgcggcgagcggcgatacgcttcggggaggtgcgtagcacctgtg-atccggagatttccgaatggggaaacccaatcgtgcaaccacgattatcccgagc----------a--gcgggatgcgaacccgctgaagtgaaacatctcagtaagcggaggaacaaagaacaat--atattccctaagtagcggcgagcgaaacgggaagagccgaaactata--caaaatatttacttagccgaaccgtctggaaagcgggaccaaagacggtgatagtccggtaggcgaaaagtaatcttagtttttattcttcagtactccgaggtca-agcagcttcggag…
>CPR_PB3_Liptonbacteria_GCA_001005035.1
tgattggcaattaagggcgaatggtggatgcctagacaccaaaaggcgatgaaggacgcagcgagcggcgatacgcctcggggaggtgcgtagcaccggtg-atccgaggatgtccgaatggggaaaccctgtcgtgtaaacacgatgaccccg-----------cta--tcggggagcgaacccgctgaagtgaaacatctcagtaagcggaggaacaaagaacaag---tattccctgagtagcggcgagcgaaacgggaagagcccaaacccta--caaaatcatgagttagccgaagcctctggaaagtggagccaaagacggtgatagcccggtaggcgaaaacttattctagtttcttttcttgagtacttcaaggtaa-gagcgccttgaag…
>CPR_otherPB_Sungbacteria_GCA_001822385.1
----ggga-gataagggcgtatggtggatgccttggctctcgaaggcgatgaaggacgcggcggccggcgatacgctccggggaggtggcgagcacctttg-atccggaggtctccgaatggggaaaccccccggcatgtatgaagttaccctgtattaaagatataaacggcagagcgatacccggtgaagtgaaacatctcagtaaccggaggaacagaaaacaacagtcattccctgagtagcggcgagcga
>CPR_otherPB_Sungbacteria_GCA_001820775.1
----gtat-aataagggcgtatggtggatgcctagggatatcgaggcgatgaaggacgttgcggcctgcgataagctacggggaggtggcaagcacctttg-atccgtagatttccgaatggggaaaccccgccg-gcaaatcgcattaccccatgccaaatacataggagctcggagcgtacccgctgaagtgaaacatctcagtaagcggaggaaaataaaaaaat-ggcattcccttagtagcggcgagcga
>CPR_otherPB_Sungbacteria_GCA_001822375.1
tgggtgagaaataagagcatatggtggatgcctagggttcgaacggcgatgaaggacgtggcggccggcgatacgcctcggggaggtggcgagcacctttg-atccggggatgtccgaatggggaaacccggttttgtaaaccatgttaccctgtgcagaaaacgtagaaggacggcgcgtacccgctgaagtaaaacatttcagtaagcggaggaacagaaaacaatgaccattcccttagtagcggcgagtgaaaagggatcagcccaaaccacg-acgaa-t-cttcgttaggagaacgtcctggaaaggcgggccatagagggtgatagccccgtacacgaaaacggtctcgtatcattaatcttgagtactgccccgtac-ggcgactgggcag…
>CPR_otherPB_Sungbacteria_GCA_001820655.1
ggtagatgaaaaaagggcgtatggtggatgccttggctttgagaagcgatgaaggacgtggcggcctgcgataaacttcggggaggtggcgagcacctttg-atccggaggtgtccgaatggggaaaccccgatgcg-gaa-ggcattgatccgacagcaat--------gtcggaagcgcacccgctgaagtaaaacatttcagtaagcggaggaatagaaaacaatg-ccattcccttagtagcggcgagtgaaaagggaagagcccaaaccgcacacgaa-t-cttcgttagcggaa-ggcatggaaaggccggccaaagcgggtgagagccccgtacgcgaaaacggtctcgtaacattgttcttgagtactgccccgtac-ggagactgggcag…
>CPR_otherPB_Ryanbacteria_GCA_001819935.1
ggagtggataataagggcgaacggtggatgcctaggcttggaaaggcgacgaaggacgtggctggctgcgataagcgtcggtgaggtgtcgagcacctttg-acccggcgatttccgaatgggggaacccagcactgtgaaaagtgttatcccg-----------ata--tcgggaggtgcacctggagaagtgaaacatctcagtacccagaggaaaagagaccaactggtattcccttagtagcggcgagcgaaaagggagaagcccaaatccta--caaatcaaattcttagcagaaaatcctggaaaggacaaccatagaaggtgacagtcctgtatgcgaaaagggttccttaatgat-ttcttgagtatcccggcacat-gaatgggctggga…
>CPR_otherPB_Ryanbacteria_GCA_001003085.1
gggaaacaaaaaaagggcgtatggtggatgcctaggttctaagaggcgatgaaggacgtggctggctgcgataagcgtcggggaggtgtcgagcaccttcg-atccggcgatttccgaatagggaaacctaccacgacgaaa-tcgttatcctgaactca----------atatgaggcaaacccagggaagtgaaacatctcagtacctggaggaaaagaaaagaatt-tcattcccttagtagcggcgagcgaaacgggagaagcccaaacctta--tacaacaaaatattagcggaatcggctggaaagcccaaccaaagaaggtgatagtcctgtatgcgaaagtattttttagacagtattcttgagtacttcgacacat-gacagggtcggag…
>CPR_otherPB_Ryanbacteria_GCA_001819745.1
aatggggttactaagagcatatggtggatgcctagactttgaatggcgatgaaggacgtggcggactgcgataagcttcggggaggtgtctagcacctttg-atccggagatttccgaatggggaaacctatactggtacaccgtat-gtcctaaccgcgtg--------gtagggagcgcacccagggaagtgaaacatctcagtacctggtggaaaagagaacaat--ttattcccttagtagcggcgagcgaaccgggaacagcccaaacctta--taaaat-cttcgttagcggaagcggctggaaagccccaccacagcgggtaatagtcccgtacgcgaaaacggtttcttgatactcatcttgagtacttcgacaaat-ggttgcgtcggag…
>CPR_otherPB_Giovannonibacteria_GCA_001780675.1
tagcgggggtaaaagggcgtatggcggatggctcgagataaatgggcgacgaagggcgtggcggactgcgttaagcttgggggaggtgtctagcacctttg-atcccaagatttccgaatggggaaacctcgttttgcgaaaaaaacgagctccaccttg----------cggagcggcgaacccgctgaagtaaaacatttcagtaagcggaggaaaagaaaacaat--atattccccaagtagcggcgagcgaaaagggaaaagcccagagttca--aaaaaggtctgtctagcagaacgccctggaaaggccggccaaagagggtaatagccccgtaagcgaaagtcacctctctggaccttacttgagtaccccgaaaaac-gtgatgttcgggg…
>CPR_otherPB_Giovannonibacteria_GCA_001778985.1
ggagcggaaaataagagcgtatggtggatgcctagggtttcgaagacgatgaaggacgtggcggactgcgataagcatcggggaggtgtcgagcacctttg-atccggtgatttccgaatggggtaacctaattcgat-aatcgaattgctttccgagtaac--------ggactgcgtgcacctggggaagtgaaacatctcagtacccagaggaaaagaaaacaatggacattccctaagtagcggcgagcgaaaggggaaaagcccaaacctta--gaaattagttgtttaggggaacgccctggaaaggccggccaaagagggtaatagccccgtacttaaaaaaccttccttgtcttttttcttgagtacttcgagacaa-gataagctcggag…
>CPR_PB4_Vogelbacteria_GCA_001823025.1
caccggagatctaagagcatgtggtggatgcctagactctaaatggcgatgaaggacgtagcaagctgcgataagcttcggggaggtgttgagcaccttcg-atccggagatttccgaatggggaaaccccttacagtaatctgtaagaccctgccttga----------cagaggagcgcacctagggaagtgaaacatctcagtacctagaggaacagaaacaaatg-gtattcccttagtagcggcgagcgaaaagggagaagcccaaacctta--caaatgtttaaattaatcgaa-ccgctgggaagcggcgccacagacggtaatagcccggtagatgaaaatttacttttgccattattcttgagtacctcgggacat-gactagcttgagg…
>CPR_PB4_Vogelbacteria_GCA_001823055.1
taataggaaatcaagagtatatggtggatgcctagactttagaaggcgatgaaggacgtagcaggcgacgatatgcttcggggaggtgcctagcacctttg-atccgaagatttccgaatgggggaacctaattccgt-aacggaattgcc-tggatcaa----------gcagagcgtgcaccctgggaagtgaaacatctcagtaccaggaggaaaataaactaat--gtattcccttagtagcggcgagcgaaaagggagaagcccaaaccgta--caaaagattttgttaagcgaa-ttgctgggaagcaatgccacagaaggtaatggccctgtagctgaaaataaattcttgtctctgatcttgagtacctcgaggaac-gacagccttgagg…
>CPR_PB4_Nomurabacteria_GCA_016699365.1
taataggaaattaagagcatatggtggatgccttgactctacatggcgatgaaggacgtagcaggctgcgataagcttcggggaggtgcctagcaccgatatatccgaagatctccgaatggggaaaccctattgagtaaactcaataacttttgattaa----------aaaaagagtatacccagggaagtgaaacatctcagtacctggaggaaaagaaaacaaacaaaatttccgaagtagcggcgagcgaaatggaaagagcccaaaccgta--caaaatgtattgatagtagaa-ttgttggaaagcaacgccaaagacggtgatagcccggtacacgaaattaatcttttgttgtcattcttgagtacctcaagacac-gaatagcttgagg…
>CPR_PB4_Nomurabacteria_GCA_016699085.1
taataggaaagtaagagcatatggtggatgccttgactctacatggcgatgaaggacgtagcaggctgcgataagcttcggggaagtgcctagcacttttg-atccgaagatctccgaatgggggaaccccatcgagtaaactcgatgactctgtctttat---------atagagagtatacccagggaagtgaaacatctcagtacctggaggaaaagaaaacaaacaaaatttccgaagtagcggcgagcgaaatggaaatagcccaaaccata--caaaatgtactaatagtttaa-ttgttggaaagcaacgccacagacggtgatagcccggtaagcgaaattagttttttattgtcattcttgagtacttcaagacat-gaatagcttggag…
>CPR_PB4_Nomurabacteria_GCA_001871775.1
cgacggaaatttaagggcgtatggtggatgccttgactctaagaggcgatgaaggacgtggcagtctgcgataaacttcggggaggtgacgagcacctttg-atccggaggtgtccgaatggggaaacccggtcgagtaaa-tcgaccatcccg----------------gcgggaagcatacccggggaagtgaaacatctcagtacccggaggaaaagaaaccaat--gtattccctgagtagcggcgagcgaaacgggagaagcccaaacccca--aaaattgttttgttagctgaa-acgctggaaagcgttgccccagacggtgatagccccgtaagcgaaaacgaatctttgttgttattcctgagtacttcaggacac-gaatagcttgaag…
>CPR_PB4_Nomurabacteria_GCA_001873305.1
aacaggaaatataagagcatatggtggatgccttggttctaagaggcgatgaaagacgtagcaggctgcgataagcttcggggaggtgcctagcacctttg-atccggagatttctgaatggggaaaccccataaccgtaatggttatgacctaatttaa----------tgtaggagtatacccagggaagtgaaacatctcagtacctggaggaaaataaaaaaaggaacatttcctgagtagcggcgagcgaaacggaaatagcccaaacctta--caaaatgtaatgttagttgaa-atgctggaaagcatagccctagacggtgatagcccagtaaacgaaaacctttctttgtctttgttcttgagtacttcgagacac-gaatagctcgggg…
>CPR_PB4_Nomurabacteria_GCA_001785735.1
taatggaagtttaagagcatatggtggatgccttgactctaaaaggcgacgaagggcgtggctggctgcgataatcttcgggtaggtgcctagcaccgtta-atccgaaggtctccgaatggggaaacccggctggatttatctggtcatc-agcacataat---caaaagcttgaagtatacctagggaagtgaaacatctcagtacctagaggaaaagaaaacaat--ttattctcttagtagtggcgagcgaaaagggagaagcccaaaccgca--aaaaatatattattagttgaa-ttgttggaaagcaatgccatagacggtgatagccccgtaaacgaaaataatttcttgttgttattcttgagtaccccaagacat-gagtagcttgggg…
>CPR_PB4_Nomurabacteria_GCA_001785725.1
----agg-agacaagagcatatggtggatgcctaggtttgaaatggcgatgaaggacgtggcaatctgcgataagtctcggggagccgattctcagctttg-atccgggaatttcctaatgggggaacccctctgcttttat-agag-atccca-----------taa--gttggaggcgcacctggggaagtaaaacatttcagtacccataggaaaagagaccaaa-ggaatttccttagtagcggcgagcga
>CPR_PB4_Nomurabacteria_GCA_000505065.1
taatggaaatttaagagtatatggtggatgcctagactaaaaaaggcgatgaaagacgtagcaggcgacgatatgcttcggggaggtgcctagcaccttcg-atccggagatttctgaatggggaaacccttccgagcaaactcggaaactttacactaga---------tagttgtgcatacccagggaagtaaaacatttcagtacctggtggaaaagaaaacgaa--ttatttccttagtagcggcgagcgaagaggaaagagcccaaaccgta--caaaatttgttattagattaa-tttctggaaagaaacaccacagaaggtgatagtcctgtgatcgaaaataacctttgattactattcttgagtagctcaggacat-gaatagcttgagc…
>CPR_PB4_Nomurabacteria_GCA_001785575.1
taatgggataataagagcatatggcggatgcctagactctcaatagcgatgaaggacgtgg-gggctgcgataagcttcggggaggtgtcta-cacctttg-atccggagatttccgaatggggaaaccctacatagcaaactatgtaattc--ctcataag--------tgttgatgcgcaccctgggaagtgaaacatctcagtaccaggaggaacagaaaacaaagaatatttcctaagtagcggcgagcgaaaaggaaagagcccaaacctca--aaaaattgcacaatagattaa-ttgttggaaaccaacaccatagacggtgatagtccggtaatcgaaattctgtttttgttgctatacctgagtagctcaggaaac-gaaaagcttgagc…
>CPR_PB4_Nomurabacteria_GCA_000380845.1
aacagga-aattaagggcgtacggtggatgccttgactttaagaagcgatgaaggacgtggcgtgctgcgataagcttcggggaggtgcttagcacctttg-atccggagatttccgaatggggaaaccctatcaagt-aatctgat-atcccatattgaaaacataagggctgggagcgcaccctgggaagtgaaacatctcagtaccaggaggaaaagaaacaaaa--gtatttcctaagtagcggcgagcgaaaaggaagaagcccaaacccca--aaaa-taaattattagcttaaattgctggaaagcgacaccataggaggtgatagtcccgtgagcgaaaataatcttttattgttattcttgagtaccccaggacat-gaatggccggggg…
>CPR_PB4_Nomurabacteria_GCA_001786295.1
aacaggaaatttaagggcgtacggtggatgccttgactttaagaggcgatgaaggacgtggcgtgctgcgataagcttcggggaggtgcttagcacctttg-atccgaagatttccgaatggggaaaccctgtcccgt-taccggacaatttta----------atat--ttaaagagcgcaccctgggaagtgaaacatctcagtaccaggaggagtagaaacaaat--gcatttccccagtagcggcgagcgaaaaggaaggagcccaaacttca--aaaaataagttattagcttaagttgctggaaagcgacaccatagggggtgatagtcccgtgagcgaaaataatcttttattgctattcttgagtaccccaggacat-gaatggccggggg…
>CPR_PB4_Lloydbacteria_GCA_001818945.1
--------aaatcagagcgtatggtggatgccttggttgaagtaggtgatgaaggacgtcgctggctgcgataagcctcggggagttgccaagcaactgtg-atccggggatgtccgaatggggaaacccaccgatgtttac-cggt-atc-ttatctgaattcataggataatgaaacacactcgctgaactgaaacatctcagtaggcgaaggaaaagaaatcaat-gagattccgcaagtagtggcgagcga
>CPR_PB4_Campbellbacteria_GCA_001029775.1
taagaaattcataagggcgtatggtggatgccttgactctaaaaggcgatgaaggacgtggcagtctgcgataagcttcgggtaggtgactagcacctgtg-atccggagatttccgaatgggggaacccaatctgttgaac-agattaccttgatctgtaa--------actcggagtgcacctggggaagtgaaacatctcagtacccagaggaaaagaaaacaattaatatttcgtaagtagcggcgagcgaaagcgaaagagcccaaaccaca--aaaaatattttgttagttgaa-ctgctgggaagcaggaccctagagggtaatagtcccgtaaacgaaaacaattttttattgttgttcctgagtacctcaagacac-gaatggcttgggg…
>CPR_PB4_Campbellbacteria_GCA_016699465.1
----gagatttaaagggcgtatggtggatgccttggttcaatgtggcgatgaaggacgtggtgaactgcgataagcttcggggaggtgttaagcacctttg-atccggagatttccgaatggggaaaccctatcgagtaacctcgataatctca----------------atgaggagcatacctggggaagtgaaacatctcagtacccagtggaaaagaaaacaat--tcattcccttagtagcggcgagcga
>CPR_PB4_Campbellbacteria_GCA_001774495.1
taatgaaattttaagggcgtatggtggatgccttgactctaaaaggcgatgaaggacgtggcagtctgcgataagcttcgggtaggtgactagcacctttg-atccgaagatttccgaatgggggaacccaacagagtaaa-tctgttacctaaaatttaa---------attaggagcgtacctagggaagtgaaacatctcagtacctagaggaacagaaaaaaatcgatatttcgtcagtagcggcgagcgaaagcgaaggagcccaaaccgca--aaaaatattttgttagttgaa-ttgttggaaagcaaaactctaaagggtaatggtcccgtaaacgaaaacaaattcttgttgttgttcctgagtacctcaagacac-gaatagcttgggg…
>CPR_PB4_Kaiserbacteria_GCA_017134395.1
ggaagttccattaagggcgcatggtggatgccttgactgaatggagcgatgaaagacgtggtcggctgcgataagtttcggggaggtgccaaacaccttcg-atccgaaaatttctgaatgggggaaccccatcgagtaac-tcgatgaccttgtacttgat--------acaaggagcacacccggggaattgaaacatcttagtacccggaggaatagaaaccaat--gtatttcctgagtagcggcgagcgaaacggaagaagcccaaacctta--caaaatatgttgttaaaagaa-aacctgggaaggttgaccctagagggtaatagtcccgtatttgaaaatgacctttagctaacgttcttgagtagctcgggacac-gaatagcccgagt…
>CPR_PB4_Kaiserbacteria_GCA_016699245.1
tacaggaatgttaagggtgtatggtggatgcctaggcttcaaagagcgatgaaggacgtggtaggctgcgttaagctccggtaagatgccaaacatcgttataaccggagatgtccgaatgaggaaactcacctgcttacg-aggta-cccttg----------------tgagggagcgtacccagtgaagtgaaacatcacagtagctggaggaaaagaaagcaaacgcgatcccctgagtagcggcgagcgaaacgggatgagcccaaacc-ta--caaattggtgtgataacaaaa-gcgttgggaagcgcgaccccagtaggtaatagtcctgtatgtgaaattgcacttttgtttctgttcctgagtagttcgggacac-gaatagcccgaat…
>CPR_PB4_Kaiserbacteria_GCA_001783515.1
ttgcaggaatagaagggtgtatggtggatgccttggattcaaagagcgatgaaggacgtgtaaggctgcgataagcttcggggagacgccaatgatctgcg-atccggagatttccgaatgaggaaactctacgtgttacg-cgtaac-ctgtg----------------tgcaggagcaaaccttctgaattgaaacatcttagtaagaagaggaaaagaaagcaattgcgataccctaagtagcggcgagcgaaaagggcagagcccaaacc-ca--aaaatgtgtattatagaagaa-catctggaaagatgaaccctagcaggtaatagtcctgtattcgaaatcttactcttggcctcgttcctgagtagggcgggacac-gaatagcccgtct…
>CPR_PB4_Kaiserbacteria_GCA_001779595.1
ttgcaggaatgtaagggtgtatggtggatgccttggctttacaaagcgatgaaggacgtggaagtctgcgataagtttcggggaggtggcaatcacctttg-atccggaaatttccgaatggggaaaccccatcagttacg-gatggt-ccttg----------------tgaggacgcgcacctagggaagtgaaacatctcagtacctagaggaatagaaagcaattgcgattccctgaatagcggcgagcgaaacgggaatagcccaaacc-ta--ccaaatatatgtatagaagaa-gagctgggaagctcgaccctagagggtaacagtcccgtatttgaaatgcatctgttgatcttgttcctgagtagtccgagacat-gaatagctcggat…
>CPR_PB4_Kaiserbacteria_GCA_001781805.1
ttacaggaatgtaagggtgtatggtggatgcctaggcttcaagaagcgatgaaggacgtgttaggctgcgataagtttcggcgaggtgccaaatacctttg-acccgtaaatttccgaatggggaaaccctcctgtc-atg-aggaat-ctacg----------------tgtagatgcgcacccagcgaagtgaaacatctcagtagctggaggaatagaaagcaattgcgattccctgagtagcggcgagcgaaacgggaacagcccaaacc-ta--caaaacgtatgtatagaaaaa-gagctggaaagctcgaccccagtaggtaatagtcctgtattcgaaatgcatcttttgtttttgttcctgagtagttcgagacat-gaatagctcgaat…
>CPR_PB4_Kaiserbacteria_GCA_001783565.1
ttacaggaatgtaagggttttaggtggatgcctaggataagagaagcgatgaaggacgtgataggctgcgataagtttcggcgaggtgccaaataccttcg-acccggaaatttccgaatggggaaaccctcctgctttca-aggaat---ctg----------------tgcagatgcgcacccagggaagtgaaacatctcagtacctggaggaatagaaagcaattgcgattcccttagtagcggcgagcgaaacgggaacagcccaaacc-ta--caaaatgtatgtatagaaaaa-gcgttggaaagcgcgaccccagtaggtaatagtcctgtattcgaaatatatcatctgattctgttcctgagtagttcgggacac-gaatagcccgaat…
>CPR_PB4_Kaiserbacteria_GCA_001781625.1
aggagatt-gaaaagggtgcgcggtggatgccttggcttaggacagcgatgaaggacgtaactgcttgcgataagcttcggggaggcggcttgtgcctttg-atccggagatctccgaatgaggaaactctctcgcctttg--gaga-atcctt-----------taa--gagggaagcatacctcgggaagtgaaacatctcagtaccgagaggaaaagagaacaaa-gtgattccccaagtagcggcgagcgaaaagggaggagcccaaaccata--cgaa-cgatgcgttaggagaatctgctggaaagcggagccccagagggtaatggccccgtatccgaaaacaaacttgtgtcactgttcttgagtagctcgagacac-gaatagctcgagc…
>CPR_PB4_Zambryskibacteria_GCA_000995625.1
aatgggaaatttaagagcgtatggtggatgccttgactcaaaatggcgatgaaagacgtagcaggctgcgataagttacggggaggtgcctagcaccgtta-atccgtaaatttctgaatggggaaacctaatgac-tatatgtcattgctt--------------agagcctaagtgcatacccggggaagtaaaacatttcagtacccggaggaaaataaaacaatcgacatttccttagtagcggcgagcgaaacggaaatagcccaaacc-ta--caaaatattatgttagttgaatgtgctggaaagcacgaccctagagggtaatggtcccgtaaacgaaaatatatctttgtttctgttcttgagtacctcgagacat-gaatagctcgggg…
>CPR_PB4_Zambryskibacteria_GCA_001825395.1
----------ttaagagcgtatggtggatgccttgactcaaaatggcgatgaaagacgtagcaggctgcgataagtttcggggaggtgcctagcacctgcg-atccggaaatctctgaatggggaaaccctccaacattcattaaattatcctgtatagaatatatgagtgtacagagtacacccagggaagtaaaacatttcagtacctggaggaaaaaagactaa--agaattgcgcaagtagcggcgagcga
>CPR_PB4_Taylorbacteria_GCA_000996205.1
----gga-aattaagagcatatggtggatgccttgactctaagaggcgatgaaggacgtagcgagctgcgataagcttcggggaggtgcctagcacctttg-atccggagatctccgaatggggaaacccctccctgcgaatcgggttatcccattctaaatatatga--gcgggtagcatacccagggaagtaaaacatttcagtacctggtggaaaagaaaacaatcgacatttccttagtagtggcgagcga
>CPR_PB4_Taylorbacteria_GCA_001821295.1
taataggaaattaagagcatatggtggatgccttgactagaagaggcgatgaaggacgtagcaagctgcgataagctccggggaggcgccaagcacctttg-atccggagatctccgaatggggaaacccctcgtggtgaacagaactattctgcgcagaatgcacag--cgcgcgagcatacccagggaagtaaaacatttcagtacctggaggaaaagagactaa--agaattccgttaatagcggcgagcgaaagcggaagagcccaaaccata--caaaatgttgtgttaaccgaa-aagctggaaagcttggcccaaggaggtaacagccccgtaggtgaaaacgcatctttgttcctgttcttgagtacttcgagacac-gaatagctcggag…
>CPR_PB4_Taylorbacteria_GCA_001820875.1
aataggaagtctaagagcgtatggtggatgccttgactccaaaaggcgatgaaggacgtagcaggctgcgatatgcttcggggaggtgcctagcacctttg-atccggagatttccgaatggggaaaccccatcaagtaaacttgatgactttcaccgcaa---------tgagagcgcgcacccagggaagtaaaacatttcagtacctggaggaagagaaaacaat--tcattgcgtgagtagcggcgagcgaaagcgcagaagcctaaactgta--caaaattttgtgttagctgaa-aagctggaaagcttggccccagtgggtgatagccccgtaagcgaaaattcatttttgctggttttcttaagtacttcgagacac-gaatggctcggag…
>CPR_PB4_Taylorbacteria_GCA_001820985.1
----gga--attaagggcgtatggtggatgccttgactccaaaaggcgatgaaggacgcgagcggcggcgatacgcttcggggaggtgcctagcacctttg-atccggagatgtccgaatggggaaacccctcgtgctttgccgagt-acct--ccacgaatatataggtcgcgcgagcgcacccagggaagtaaaacatttcagtacctggtggaaaatagaacaa--gttatttcctaagtagcggcgagcga
>CPR_PB4_Taylorbacteria_GCA_001820955.1
----agg-aaataagagcatatggtggatgccttggctcgaagaggcgatgaaggacgtagcgggctgcgataagcttcggggaggtgcctagcacctttg-atccggagatgtccgaatggggaaaccctgcggcgtaaatcaaattatcctattttcaat--ataagccttcggagcgtaccctgggaagtaaaacatttcagtaccaggaggagtagaaactaa--agcattccgtaagtagcggcgagcga
>CPR_PB4_Taylorbacteria_GCA_001822615.1
----atggagacaagggcgtacggtggatgccttggcttgaaagagcgatgaaggacgctgcgagcggcgatacgcttcggggaggtgccgagcacctttg-atccgaagatgtccgaatggggaaacccgtctcgatgaatcgagacactccg-----------ca---tcggagagcgcacccggggaagtaaaacatttcagtacccggaggaaaagaaaccaat-ggtatttccttagtagcggcgagcga
>non-CPR_non-CPR_Cyanobacteria_NC_019753
ggtcaagataataagggctgatggtggatacctaggcacacagaggcgaagaaggacgtgattaccgacgaaacgctccggggagttg-gaagtaacattg-agccggagatgtccgaatggggcaaccctttat-------------acaacctgttgaatccataga-ggtatgagccaacccagcgaattgaaacatcttagtagctggaggaaaagaaatcaacagagattcccttagtagcggcgagcgaagcgggaacagcctaaaccatacaagacccatgaagctaaacgaagcagcctgattgctgcaccagagaaggtgaaagtcctgtagttgaaagtgaa-ggcttagttgcatcccgagtagcacgggtcacgagaaatcccgtgt…
>non-CPR_non-CPR_Cyanobacteria_NC_004113
ggtcaagctacaaagagcctacggtggatacctaggcacacagaggcgatgaaggacgtggataccgacgatacgcttcggggagctg-gaaacagctttg-atccggaggtctccgaatggggcaacccagtaactctaacc----------------aatccataa--ttagagggcgaacctggcgaactgaaacatcttagtagccagaggaaaagaaagaaaactcgattcccttagtagcggcgagcgaaaggggaacagcctaaacca----ggaattgggcggctagacgaa-gtagtggaatgctacaccagagaaggtgaaagtcctgtagtcgaaagctta-atcctagctgtatcccgagtagtccggagcacgtggaattccggat…
>non-CPR_non-CPR_Cyanobacteria_NC_022600
agtcaagctacacagggcgtacggtggatacctaggcacagtcagccgatgaaggacgtggctaccgacgaaacgcgacggggagctg-gaagcagctttg-atccgtcggtctccgaatgggggaacccggcatccttaacgatgtcgtc-------------------caaggacgggaaccaggcgaattgaaacatcttagtagcctgaggaaaagaaagtaaaaacgattcccttagtagtggcgagcgaacggggaagagcccaaaccgct--ggagtgcgtcagctaggcgaacggcttggaaaagccgaccagagcgggtgatagtcccgtagccgaaagttga-accctggctgtatcctgagtagcacggggcacgtgaaatcccgtgt…
>non-CPR_non-CPR_Firmicutes_NC_018068
ggtcaagctactaagggcgtacggtggatgcctaggcgctaagagtcgaagaagggcgcggttaacagcgaaatgccacggggagtcg-taagcagctttg-atccgtggatacccgaatggggcaaccccaccggagtcatccggtgatctgcagctgaatacataggctgccgaggacaacccggggaactgaaacatctaagtacccggaggaagagaaagaatcatcgattccctgagtagcggcgagcgaaacgggaagagcccaaaccatg-g--------atctctagctaagagatctggaaaggtcgagcagagaaggtaacacccctgtaagcgaaagagca--ctgtgagggaatcctgagtaccgcgggacacgtgaaaccccgtgg…
>non-CPR_non-CPR_Firmicutes_NZ_CP007033
ggtcaagatataaagggcatacggtggatgccttggcgccaagagccgaagaaggacgcggttaacagcgaaatgccacggggagtcg-taagcagcatag-atccgtggatgtccgaatggggcaacccatccagagtcatttggatatcctgtactgaataaatagg-cagcgaaggcaagtcggggaactgaaacatctaagtacccggaggaaaagaaagaataatcgattcccagagtagcggcgagcgaaacgggactagcccaaaccgca-g-------tgtttttagctaagcgaactggaaagttccggcataggaggtaaaacccctgtaagcgaaaagaag--cttagagagtatcctgagtaccgcgggacacgagaaaccccgtgg…
>non-CPR_non-CPR_Firmicutes_NC_021184
ggtcaagctaacaagagcgtacggtggatgcctgggcgctaagggccgaagaaggacgtggtaagctgcgaaaagctacggtgagccg-caagcagcattg-atccgtagatctccgaatggggcaacccgttacctgtaacggtaacatcttatgctgaatccataggcataagaagggcacccggtgaactgaaacatctaagtagccggaggaacagaaatcaaccgagaacccccaagtagcggcgagcgaaccggggccagcctaaacctta-a-------tagccttagccaacccgccaggaacggcgggccacagaaggtaacagccctgtaggcgaaaaggca--tttagagagcatcccaagtaccgcgggacacgagaaaccccgtgg…
>non-CPR_non-CPR_Firmicutes_NC_009253
ggtcaagaaagaaagggcatacggtggatgcctaggcgctaagggccgaagaagggcgcggtaagctgcgaaaagccacgaggagccg-caagcagcattg-attcgtgggtacccgaatggggcaacccggcggag-caaatccgtcaccctatgctgaatccatagg-tagaggagggcacccggggaactgaaacatctaagtacccggaggaagagaaagaaacatcgaacccccaagtagcggcgagcgaaaaggggcgagcctaaaccata-a------ctagacctagtcaagacacctggaaaggtgctgcacagaaggtaaaacacctgtagacgaaaggttg--tacagaggaaatcccaagtaccgcgggacacgagaaaccccgtgg…
>non-CPR_non-CPR_Firmicutes_NZ_CP014606
ggtaaagttataaagggcatatgatggatgccttggcactgagaggcgaagaaggacgtggcaagctgcgaaaagctctgggtagacg-caagcatcgaca-aaccagagatatccgaatggggcaacccttgtagagtcatctacaaatccttatctgaacacatagggtaaggaggcgaacgcagggaactgaaacatctaagtacctgtaggaggagaaagaaaattcgatttcctaagtagcggcgagtgaaatggaaagagcctaaaccata-gtattttctggagatagtcgaaggatctgggaaggtccaccgaagatggtgagagtccagtagacgaaattgaa--gcgaagcagtatcccaagtaccacgagacacgagaaaccttgtgg…
>non-CPR_non-CPR_Firmicutes_NC_014220
ggtcaagctagtaagggcgtacggtggatgcctaggcgctaggaggcgaagaagggcgtggcaagctgcgaaaagccacggggagctg-caagcggcgaag-atccgtggatacccgaatgggggaacccggtacctgggaaggtatcatccctacctgaacacatagggggagaggcgagacccggcgaactgaaacatcttagtagccggaggagaagaaagcaagagcgattcccttagtagcggcgagcgaaaggggaagagcctaaaccg----gaag---gctgtttaggaaacgaggctggaaagcctgaccacagagggtgaaagtcccgtattcggaaagcaggttctagagcataccccgagtaccgctggacacgtggtatccggtgg…
>non-CPR_non-CPR_Firmicutes_NC_008346
ggtcaagataaaaagagcgtatggtggatgcctaggcgccaggaggcgaagaaggacgcggcaagcggcgaaacgccacggggagctg-caagcggcatag-atccgtggatatccgaatggggaaacccggcagaggcgaatctgtcacccttacctgaacacatagggagaggagcgagacccggtgaactgaaacatcttagtaaccggaggaagagaaatcaagcgagatttcctaagtagcggcgagcgaaagggaaagagcccaaaccata-agaaaatatatgtttagctgaataagctggaaagctcagccacagaaggtgaaagccccgtaagcgaaaagcat-tctgagcagagaccccgagtaccgccggacacgtggaacccggtgg…
>non-CPR_non-CPR_Firmicutes_NC_018870
----aagctaggaagggcatatggtggatgcctaggcgtcaggggctgaagaagggcgtggcaagctgcgaaaagcctcgggtagccg-caagcggcgtag-atccggggatacccgaatgggggaacctggccgggataatccggtcatcctgtactgaacacataagtacaggagagcaaccgggggaactgaaacatcttagtaccccgaggaaaagaaatcaaaagagattccctgagtagcggcgagcga
>non-CPR_non-CPR_Firmicutes_NZ_CP009170
ggtcaagtaggtaagggcatatggtggatgcctgggcacttggagccgaagaaggacgcggcaagcggcgaaacgctccggggagccg-caagcggcgaag-atccggaggtatccgaatgggggaacccactcgaggtaattcgagtatccactgatgaacacatagtcagtggaggggaaccgcgcgaactgaaacatctaagtagcgcgaggaaaagaaagaaagaacgattccctaagtagcggcgagcgaaaggggaggagcccaaacccta-aggggaaaatagcttaggcaacggacctggaaaggccggccgaagaaggtgaaagccctgtagccgaaaagcgatacccgggtggaatccagagtaccacgggata--ggcgaccctgtgg…
>non-CPR_non-CPR_Firmicutes_NC_013385
ggtcaagatagtaagggcgcacggtggatgccttggcgccaggagccgacgaaggccgtggcaagctgcgataagcctcggggagccg-caggcagcgtgg-acccggggatggccgaatggggaaacctggcgtgggtaaacgcgtcatcccgtgctgaatccataggcacgggaggggaaccgggcgaactgaaacatcttagtagcccgaggagaagaaatcaaccgagattccctgagtagcggcgagcgaaaggggaggagcccaaaccgtt-agaaaaccgggggttagccaagaggtctggaaaggcccgccgtagagggtgatagccccgtaggcgaaagcttcccctggggtccgatcccaagtaccacgggacacgtggaatcccgtgg…
>non-CPR_non-CPR_Firmicutes_NC_010718
ggtcaaggtaataagggcgtacggtggatgccttggcgccaggaggcgaagaaggacgcggccagcggcgaaacgccacggatagccg-taagcagcaacg-acccgtggatttccgaatgggggaacccacctgggacaaaccaggtaccgtatggtgaattaatagc-tacggggcgacacccggggaactgaaacatcttagtacccggaggaacagaaagcaaaagcgatttcccaagtagcggcgagcgaacgggaaagagcccaaacctta-gtattacagtttactagccaacccggttggaaggccgggccagagagggtgaaagccccgtaggcgaaagtaaagctactggtactcacccgagtaccacggggctcgaggaaccctgtgg…
>non-CPR_non-CPR_Firmicutes_NC_006177
aatcaagctggaaagggcacacggcggatgcctgggcgccaggcgccgatgaaggacgtggcaagctgcgataagcctcggggagccg-caagcagcgtag-atccggggatctccgaatggggcaacccggctggcgtaatccagtcacccacagctgaatccatagg-gtgaggagggcaccgcccgaactgaaacatctcagtagggcgaggaaaagaaatcaaccgagattccctcagtagcggcgagcgaacggggaggagcctaaaccacg-atgct-cctgagcctagctaacaggtctggaaaggccggccgcagaaggtaatagccctgtaggcgaaaggtga--cgcttggcggatcccaagtaccacgggacacgaggaatcccgtgg…
>non-CPR_non-CPR_Firmicutes_NC_014098
----aaagtaggaaaggcgcacggtggatgcctgggcgctgggagccgaagaaggacggggcgaacgccgaaacgccccggggagccg-taagcagctggg-atccggggatgtccgaatgggggaacccgccgtctgggag-gcggcatcggcggctgaatgcatagg-gtcgagggcagaccgggggaactgaaacatctcagtaccccgaggagaagaaagcaaccgcgattccccaagtagcggcgagcga
>non-CPR_non-CPR_Firmicutes_NZ_AP014924
ggccaagcaagagaaggccgacggtggatgcctaggcgcttcgggccgatgaaggacggggccagcaccgatatgccccggggagccg-ctagcagctttg-atccggggatctccgaatggggcaacccgccagggcgag-------gtcctggcagcaaggcgcaag-ccttgcggggcaccgggggaagtgaaacatctcagtaccccgaggaagagaaagcaaccgcgattccccaagtagcggcgagcgaacggggaagagcccaaaccg---a----cggagagccgagctgaagggcctggaaaggtccgccagagagcgtgaaagccgcgtaagcggaggctcgaacccgtgaccgatcccgagtaccacgggacacgaggaatcccgtgg…
>non-CPR_non-CPR_Firmicutes_NC_015555
ggtcaagttagaaagggcgtatggtggatgcccaggcacttagagccgaagaaggacgcagcaagcggcgaaacgctccggggagtcg-caagcaacgcag-atccggagatctccgaatggggaaacccgcttaaggtaatttaagcatcccatggtgaacacatagccgaggaagggacaccgcgtgaactgaaacatctaagtagcgcgaggaaaagaaagaaaaagcgatttcctgagtagtggcgagcgaaaaggaaagagcccaaaccc---agtataaaaaagcgaagccaacagacctgggaaggcaggccaaagaaggtgaaagccctgtaggcgaaagcttc-taccgagtgggatccagagtaccacaggata--ggcaacccggtgg…
>non-CPR_non-CPR_Firmicutes_NC_015520
gatcaaggaagaaagagcatagggtggatgcccaggcactgggagccgaagaaggacgtggtaagctgcgaaaagccatgcgtagccg-caaacagcgaag-aggcatggatatccgaatggggcaacccgctgcaggtaactgcagcatcgcatgataaatacatagt-tgcgaagggaaaccgggggaactgaaccatctaagtaccccgaggaaaagaaagaaacatcgatttcccaagtagcggcgagcgaacaggaaagagcccaaaccata-g----ggaacaatatagccaaggcggaagggaagccgcgccacagaaggtgacagccctgtaggcgaaatattg--tacagccggtatccggagtaccacgggacacgaagaatcccgtgg…
>non-CPR_non-CPR_Firmicutes_NZ_LT700187
gatcaagctatgaagagcacagggtgaatgccttggcatcaagaaccgaagaaggacgtgtcaagctgcgaaaagctgcggggagttg-caagcaacattg-atccgcagatatccgaatgagggaactcagcacatgtaattgtgttaccatatactgaatccataggtatatggggggaacccggtgaactgaaacatctaagtagccggaggaaaggaaaacaaccgtgattctcaaagtagcggcgagcgaaatgggaagaggccaaaccgtg-a-------cgaatatagctaatagcattggaaagtgcagccaaagagggtaaaagccccgtaagcgaaatacga-agcgagatgggcaccagagtaccacggggcacgtgaaacccagtgg…
>non-CPR_non-CPR_Firmicutes_NC_016627
ggtcaagctactaagagcatagggtgaatgcctaggcaccagaaggcgaagaaggacgtggtaagctgcgaaaagctgcggtgaggcg-caaacaccatcg-acccgcagatgtccgaatgggggaacccacctgaggtaattcaggtactgctacatgaatccatagt-agcagggcgagacgtggggaactgaaacatctaagtacccacaggaaaagaaatcaaccgagattccgtaagtagtggcgagcgaaagcggaagagcccaaaccatg-a----ctctgagcttagcaaagtaaccaggaaagttacaccatagagggtaaaagtcccgtatgcgaaaagtga-gacaggccaggatccagagtaccacgaggcacgtgaaaccttgtgg…
>non-CPR_non-CPR_Firmicutes_NC_013895
ggtcaagttacaaagagcacagggcgaatgccttggtaccatgagccgatgaaggacgtgacaagctgcgaaaagctacggggaggag-caaatacc--gg-atccgtagatatccgaatggggcaacccgatcggggtaatccgatcaagtctgcatgaataaatagt-atactggggagacgtggggaactgaaacatctaagtacccacaggaagagaaatcaaccgagattccgtaagtagtggcgagcgaaagcggaagaggccaaaccgtc-aaagc---aaggattagtggagcggatggaaagccgagaccaaagagcgtaatagtcgcgtacacgaaaatctg--ggctagca-gcaccagagtaccacgagacacgaggaatcttgtgg…
>non-CPR_non-CPR_Firmicutes_NZ_HF545616
ggttaagctaagaagagcgtagggagaatgccttggcattaggagccgatgaaggacgtgataagctgcgataagctgcggggatcag-caagtagaattg-atccgcagatttccgaatggagcaatccgtatgtg--tatacatacatcatatactgaataaataggtatatgaggggaaccgcctgaactgaaacatctaagtagggcgaggaaaagaaatcaaccgagattctgtgagtagtggcgagcgaaagcggaagaggctaaaccata-gcattgataatttctagttgaaacgtgtgggaaaacgtaccgaagagtgtgagagtcacgtaagcgaaagagaa-cagcgagctgtatccaaagtaccgcgggacacgtgaaaccccgtgg…
>non-CPR_non-CPR_Firmicutes_NZ_CP017037
agttaagatactaagggcatacggtggatgccttggcgatatctgccgaagaaggacgcgacaagctgcgaaaagctacgggtaggcg-caaataccgttg-aaccgtagatatccgaatggagaaatccggcggtggtaataccgtcacccat--------cgaccggtatgaggagggaactcggtgaactgaaacatctaagtaaccggaggagaagaaatcaaacgagataccccaagtagcggcgagcgaacggggaagagcctaaaccg---attggaggaaaagttagccaaatctcttgggaaagagagccgaagacagtgagagcctggtaggcgaaaacaagtctaaggacggaatccagagtagtgcgggacacgagaaatcccgtat…
>non-CPR_non-CPR_Firmicutes_NC_015437
agtcaagctacgaaaggcatacggtggatgccttggcgtcaggagtcgaagaaggacgcgataagctgcgaaaagccgtggggagccg-caaatagcctcg-atccacggatatccgaatggggcaacccagtgcgagtcatcgcactaccc------------a-----aagggagacaaacccggtgaactgaaacatctaagtagccggaggaaaagtaatcaaacgagattcccccagtagcggcgagcgaagcgggaagagcccaaaccg---aagggaaagcagtctagtggaacggcatgggaaggccgggcgaagagagtgagaccctcgtacacgaaaggctg-aacgggctggaatccagagtaccacgggacacgaggaaccctgtgg…
>non-CPR_non-CPR_Firmicutes_NZ_CP019687
ggttaagctggtaagagcacacggaggatgcctaggcgctaggagccgaagaaggacgtggcgaacaacgatatgccccggggagtcg-taagcaactttg-atccggggatgtccgaatgggggaacccggctgcggttatgcagtcactcacttctgaatccatagg-tgaagaggcagaccaggggaactgaaacatctaagtaccctgaggagaagaaaacaatcgtgattccgtcagtagcggcgagcgaaagcggaggagcccaaaccatt-acaaaggagcagattaggcaagaggtctggaaaggcctgccacagaaggtaacagccctgtagctgaaagtctg--tccaaggtggatcccgagtacggcgggacacgggaaaccccgtcg…
>non-CPR_non-CPR_Firmicutes_NZ_CP019699
gattaagcaagaaagggcgcacggtggatgcctaggcgccaggagccgacgaaggacggggcgaacaccgaaatgcctcggggagccg-taagcagcgtag-atccggggatgtccgaatgggggaacccgctctctttcatgagagcatccgttgctgaatgcataggcagcggagggcaaccaggggaactgaaacatcttagtaccctgaggaaaagaaagcaaaagcgatttcctgagtagcggcgagcgaaacggaaacagcccaaaccctg-agaaacggacgggatagccaagcggcctggaacggcccatcagagaaggtaagaatcctgtaggcgaaattctggctccgagacggaccccgagtaccgcggggcacggggaaccccgtgg…
>non-CPR_non-CPR_Firmicutes_NC_015978
ggttaagttaataagggcgcatggtgaatgccttggtactaggagccgatgaaggacgcaactaactgcgataagcttcggggagctg-tacgtagctttg-atccggagatttccgaatgaggaaactcgaccagtgttatctggtcactgcatagtgaatacatagc-tgaagaggcagacgtggggaactgaaacatctaagtacccacaggaatataaagaaatttcgattccctaagtagcggcgagcgaacggggaatagcccaaaccgtt-acaaaagtatttgatagttgaagtagctgggaagctacaccaaagagagtgatagtctcgtaaacgaaatcgaacctcagttcaggatcctgagtacggcgacacacgtgaaacgtcgtcg…
>non-CPR_non-CPR_Firmicutes_NZ_CP019962
gatcaagaaacaaagagcacagggtgaatgccttggcactgggagccgaagaaggacgcgacaagctgcgaaaagccacgtttaggag-cacataccgttg-agacgtgggtgtccgaatggggaaacccggcggtcagaag-ccgtcaccgttaagtgaatccatagcttaacggagggaacccggggaactgaaacatcttagtacccggaggaaaagaaagaaacatcgattccttaagtagcggcgagcgaacgaggaagagcccagaatc---a-----tttccgtttagcagaagggcatgggaaggccccgcaaagagcgtaagacgcgcgtatgcgaaaagccg---tgaggagattcgaggagtaccacgggacacgtgaaaccctgtgg…
>non-CPR_non-CPR_Firmicutes_NZ_CP017603
ggtcaagttattaagggcaaagggtggatgccttggcactaggagccgaagaaggacgtggtaagctgcgaaaagccacggggaaccg-caagcagttttg-atccgtggatgtccgaatggggaaacccacttggggtaatccaagtatctattactgaattcatagg-atagaaggtagaccgggggaactgaaacatctaagtaccccgaggaagagaaagaaaaatcgattccctcagtagcggcgagcgaaaggggaagagcccaaaccacg-a------ataaaagtagttaagagagttggaaaactccaccatagagggtaaaagtcccgtaagcgaaactttg-ctttgaggatgatccagagtaccacgggacacgtgaaaccctgtgg…
>non-CPR_non-CPR_Firmicutes_NC_016630
gatcaagtaaaaaagagcatatggcgaatgcctaggcgctaggagccgaagaaggacgtggtaagctgcgaaaagctacggggaagtg-caagcactaaag-agccgtagatatccgaatgaggaaactcatacaggttaacctgtatattccataatgaatccatagttatgggaagggaacccggagaactgaaacatctaagtacccggaggaagagaaagaaacatcgatttcgtcagtagcggcgagcgaaagcgaaagagcccaaacct---agcattgaagaacttagtcaatatgcctggaaaggcaaaccaaagagagtaaaagtcccgtagacgaaaagaga-aagcaagagtgatcaagagtaccacaggacacgagaaacccggtgg…
>non-CPR_non-CPR_Firmicutes_NC_010001
ggttaagctaataagagcgtatggtggatgccttggcactaagagccgatgaaagacgtgataagctgcgataagctacggtgaggag-caaatacctttg-acccgtagatttctgaatggggaaacctaatggagcaaa-tccattgacgtatggtgaatacatag--atacgccgggaacccggggaactgaaacatctaagtacccggaggaagagaaagaaaaatcgatttcctgagtagcggcgagcgaaagggaaggagcctaaaccgtg-a----cttgaaaggtagaaaatggttttgggaaagccagccagagagagtgaaagcctcgtattcgaaaccgga-gagcgagcggtatccaaagtacaacgagacacgagaaaccttgttg…
>non-CPR_non-CPR_Firmicutes_NZ_CP015756
ggtcaagctacaaagggcgcatggcgaatgccttggcactaggagccgaagaaggacgcgttaagctgcgataagctttgggtaggcg-caaatacctgtg-atccaaagatttccgaatgggggaacccacatag--taacctatgtactgcatactgaataaatagg-tgcagaggtacacccggggaactgaaacatctaagtacccggaggaagagaaagaaatatcgatttcctaagtagcggcgagcgaaagggaatgagcccaaaccttgca-------attctttaattaagatagctggaaagctgctccgcagaaggtaataggcctgtaaatgaaaaggaa--gtcagatctaatccagagtaccacgagacacgtgaaaccttgtgg…
>non-CPR_non-CPR_Firmicutes_NZ_LT635475
ggtcaagttactaagagcgtagggcggatgccttggcacctagagccgaagaaggacgtgataagctgcgaaaagctacggagagctg-caaatagctacg-acccgtagatatccgaatggggaaacccagtttag-caaataaactatccactagtgaatacatagc-gtgagaagggaacccggagaactgaaacatctaagtacccggaggaaaagaaagtaacaacgattccttaagtagcggcgagcgaacgaggaccagcctgcga-----a------aaagagatagtcgaatcgactggaaag-agaatcaaagagggtaaaaatcccgtagacgaaatcgaaaagcaaactcgcttaacaagtagcatgagacacgagaaatcttgtgt…
>non-CPR_non-CPR_Firmicutes_NZ_LT635480
ggtcaaatcaagaagagcacgaggcggatgccttggcacatggcgccgaagaaggacgcgagcag--gcgataa--tgcggtttgttg-caaaaa----cgtagccgcaggtttccgaatggagcaatccggcaggggaag-cctgtcatcgtagcatgaatccatagt-tacgaggggagacccggggaactgaaacatctcagtacccggaggaaaagaaagaaacatcgattctctcagtagcggcgagcgaacggggaacaggccaacg-------------ggcagtcagtcaagtcttttggaaaaagacaccaaagaaggtgaaagtcctgtagacgaagacaagcggttggcagcacgaacgagtagcgtcggacacgagaaatccggcgt…
>non-CPR_non-CPR_Firmicutes_NC_010376
ggtcaagaaactaagggcgcaaggcggatgccttggcaccaggaggcgacgaaggacgtgacaagcaacga-aaacctcgagtaggag-caaataccagtg-actcgggggaatccgaatggggaaacctactaga---cactctagtatccatacgtaaatacatag--tatggaagcgaatgttctgaactgaaacatctaagtaggaacaagaaaagaaagaaaactcgattctccaagtagcggcgagcgaacagagaacagcccatta-----------taaactgatagacaaatcttatggaaagaagaaccaaagaaagtaacagtcttgtagtcgaaatcaga-------actttaagaagagtaccacggagcacgtgaaattctgtgg…
>non-CPR_non-CPR_Firmicutes_NC_013171
agtcaagaaagaaagggcgcaaggtggatgccttggcacatgaaggctatgaaggacg---taagtgaacgaaaactagggagagctc-acaaaagcagtg-acccctaggtctccgaatggggaaacccggctgtggaag-acagtcattactaagtgaatacatagc-agtaaagcaagaccctgtgaactgaaacatctaagtaacaggaggaaaagaaagaaaactcgattttccaagtagcggcgagcgaaaagaaaagagcctaatcca----------atctagttagtcgaatcatctgggaagatgaaccaaagaaagtgaaagtcttgtagacgaaaactaa-------ccagggaggaaagtagcaccggacacgaggaatccgttgt…
>non-CPR_non-CPR_Firmicutes_NC_015601
gattaaatatgtaagggcgtacggtggatgcctaggcactaagagctgatgaaggacgcgactaacagcgaaatgcctcggggagtgg-tacgtaacaacg-atccgggggtatccgaatggggaaacccaatactggttatagtattacacataaatgaatacatagt-atgatgaggcaaccttgcgaactgaaacatcttagtagcaagaggaaaagaaaacaaaagtgattccctgagtagtggcgagcgaaacgggaaaagcccaaaccatgga----tatcgaagctagtcgaatggcattgaaaggccagtcaaagaaggtgcaaaccctgtagacgaaagcgta--ctctagtggtatcctgagtacggcgaggcacgagaaaccttgtcg…
>non-CPR_non-CPR_Firmicutes_NZ_CP011391
gatcaagcaaggaagggcgcagggaggatgcctggccacactgtactgaagaaggacgtgccaaacagcgaaatgcgacggtgagccg-taaggagcaaag-acccgtcggtgtccgaatgggggaacccggcagccagaagt----catcccg----------a-----aagggagaggtacccggggaactgaaacatctaagtacccggaggaaaagaaaacaacagtgattccccgagtagcggcgagcgaaaggggagaagcccaaaccg---agagtcgaaagacacagcagaatgtacagggaagtacagccagagagagtgaaagcctcgtaagcgaagtgttagcatgagacggtatcctgagtacggcgggacacgagaaatcttgtcg…
>non-CPR_non-CPR_Firmicutes_NC_011899
gattaagctagtaagggcttacggtggatgccctggcacctgaagccgatgaagggcgtgctaagctgcgaaaagcctcgtggagctg-ctaagggcgtag-aagcggggatacccgaatggggcaacccaccggagagga-tccggtatgtgcagctgaaagaataggctgtgcaggggaaccgggggaactgaaccatctcagtaccccgaggagtagaaatcaaccgagattctccgagtagcggcgagcgaaaggggaggagcccaaacac---agcactgaaagccttagccgaagggcctgggatggcccaccatagagggtgagagtcccgtaggtaaaaaggcggtctccgaggttatccagagtaccaccggacacgtggaacccggtgg…
>non-CPR_non-CPR_Firmicutes_NC_014654
gattaagctagaaagagcttatggtggatgcctaggcattcagagttgaagaaggacgtgaccggctgcgaaaagccgcggggagctgctaaatagcgtag-atccgtggatatccgaatggggcaacccaccagtgtgga-actggtattatgcagtgaaagaatagctgtgtaagaacaagcaggagaattgaaacatcttagtaccctgaggaaaagaaatcaaaagagattcccttagtagcggcgagcgaagggggagaagtccaaacac----taaattttttgctaagtcgaagggactggaaagttccgccagagagggtaatagccctgtaggcgaaaagcaa--gtcaaatgatatccagagtatcacgggacacgagaaaccctgtga…
>non-CPR_non-CPR_Firmicutes_NC_019978
gattaaactagtaagggcgtatggtggatatctaggcgctagaagccgaagacggacgtggcaagctgcgataagccttggtaagctg-caaacagtgata-atccagggatttcctaatgagagcacttaacatgg-taac-atgttatcttaagctaactagataa--ctaagagggtaacggggcgaactgaaacatcttagtaaccctaggaaaagaaagaaa-atcgattccctaagtagcggcgagcgaaaggggaagagtccaaactgtataatatctttttagttaattgaagtagttgggaagctacaccacagatggtaatagtccagtagatgaaaactaaggatctaaatagcacctgagtaccatgagtcacgtggaacctcgtgg…
>non-CPR_non-CPR_Firmicutes_NC_009437
ggtcaagc-atgaagggcgcagggtggatgcctcggcaccg-gagccgatgaagggcgtggcaagctgcgaaaagccacggggagccg-caagcagcgtag-atccgtggattcccgaatggggcaacctgccgggtggaag-ctggcatcgcatgctgaataagtagg-tgcgaggggagaccgggggaactgaaacatcttagtaccccgaggagaagaaatcaaatgagattccctgagtagcggcgagcgaaaggggaggagcccaaaccacgagcacttgaggcgcttagccgaatggtctgggaaggccagccgtagagggtgacagccccgtaggcgaaaagcgcgtggtgcttctgatcctgagtagcaccagtgtcgtggaagctggtgt…
>non-CPR_non-CPR_Firmicutes_NC_014377
ggtcaagctactaagggcacacggtggatgccttggcgcgagggggcgaagaagggcgcggcaagcggcgaaacgccccggggagctg-caagcagcgttg-atccgggggtacccgaatgggggaacccaccgcaggagaatgcggtatcccatgctgaacacataggcatgggaggcgaaccgggggaactgaaacatctaagtaccccgaggaaaagaaagcaacagcgattccctgagtagcggcgagcgaaaggggaagagcccaaacccag-gcgagctgaaggggtagccaacaccgctggaaagcggggccgcagaaggtgacagccctgtaggcgaaactctg--cgtctggcacatcccgagtaccacgggacacgtggaaccccgtgg…
>non-CPR_non-CPR_Firmicutes_NC_015499
-gtcaagtttttacgggcacacggtgaatgccttggcgtcgaaagccgatgaaggacgtggtaagctgcgataagcttcgggtagccg-caaacagctttg-atccgaagatctccgaatggggaaacccaatagagtgcaatctattatcatgaactgaatacataggttcatgaggacaacccagggaagtgaaacatctcagtacctggaggaaaagaaatcaaccgagattcccttagtagcggcgagcga
>non-CPR_non-CPR_Firmicutes_NC_011295
aagcaagatataaagggcgcacgggggatgccttggtagcaaaggccgaagaaggacgtggcaggctgcgaaaagcccgggggaggtgcctaacaccgaag-atcccgggatatccgaatggggaaacccgcatggaaggaaccatgcatcgcttagtgaagatatag--aagcgaggggcacgaggcgaagtgaaacatctcagtagcctcaggaagagaaatcaagagagattccctaagtagcggcgagcgaacggggaagagcccaaaccttt-acaaaacttgtacatagccgaactgcatgggaaggcagaccgaagaaggtgatagtcctgtaggcgaaatgtacagctggtatgtgaccccaagtacaccgggacacgaggaatcctggtg…
>non-CPR_non-CPR_Tenericutes_NZ_CP007520
----aaaatagtaagggcatatggtgaatgccttggaaaatggagccgaagaaggacgtgattacctgcgaaaagtctgggggagctg-gaagtagctgcg-atcccggaatgtccgaatggggaaacctaacatgatttatcatgttatctataagtgaatacatagc-ataagaagggaacctagggaactgaaacatcttagtacctagaggaaaagaaaataataatgattctgttagtagtggcgagcga
>non-CPR_non-CPR_Tenericutes_NC_010163
ggttaaggaacaaagggcacacagtggatgccttggcaccaagaggcgatgaaggacggaactaacaccgaaatgctcggggaagctg-taagtagcgacg-attccgagatgtccgaatgggggaacccactatgttgaag-atagtatct----------acacacg-ttagaggcaatacgtagggaactgaaatatctaagtacctacaggaaaagaaagtaataacgattctgtcagtagcgacgagcgaacgcggaggagccagatacc----------tatataatagatgaacgatgtgggaaaatcggtcgaagaaggtgagagccctgtagtcgaaattatatg-------gtatcagaaagtagggcgggacacgtggaatcccgttt…
>non-CPR_non-CPR_Tenericutes_NC_019949
ttttaaataagtaagagtttgtggtggatgccttgggtctgaaagtcgatgaaggacgtgattacctgcgataagcctcgtggagctg-gatatagctgcg-atacggggatttccgaatgggggaacctagttagagctaactaactgcattaagatgaataaatagtcaatagcgagacacgttgtgaactgaaacatcttagtagcaacaggaaaagaaaataaaaatgattccattagtagcggcgagcgaaattggaagagcccaaaccatt-acaaatttttgatatagcagaaaaagttgggaagctttagcatagaaggtgatactcctgtatgcgaaatatca--ttttgatagtatcctgagtagggcggggcacgtgaaaccctgtct…
>non-CPR_non-CPR_Tenericutes_NC_004829
acataagttactaagggcttatggtggatgccttggcactagaaggcgatgaaggacgtgcaaacctgcgaaatgctacggggagctg-gttggagcgata-atccgtagatgtccgaatgggggaacctgattaatagtgattaatcatttagatctgaatacatagg-ctaaaagcaatacgttgtgaagtgaaacatctcagtagcaacaggaaaagaaatcgaaagagattccgtgtgtagtggcgagcgaaagcggaacaggccaaaccatg--gactttgaactgataggagaagtagttgaaaagctacgcgataaagggttatagccccgtatcttaaattggtatacctagcaggatcctgagtacatcgagaaacg--ttatcttgatc…
>non-CPR_non-CPR_Tenericutes_NC_015155
aattaaattattaagggctagtaaaggatttcttggaaatgataggcgatgaaggacgtgcaaatctgcgaaaagtatcgggtagtcg-attagaaccata-atccggtaatctccgaatgtagaaatacagtagaaactaatctactattattacgtgaattaataa--taataaggcgaactcggcgaagtgaaacatctcagtagccgaaggaaaagaaaacga-agtgattccctcagtagtggtgagcggaaggggaagaggctaaacca---actattttggactgtagtaaagatcattggaatgtgacgctataaagggtgatagccccgtatattaaacacga-------aaggaatcctgagtagggcgggacatgtg-aaccctgttt…
>non-CPR_non-CPR_Armatimonadetes_NZ_CP007139
---caagctttagagggtgtacgacgaatgcctagggacagattgccgaagaagggcgcga-aagcggcgaaacgctcaggggagctg-cacagagtgttg-atcctgagatccccgaatggagaaatcctatcagagtaatctggtaatccatcgctgaatacatagg-ttgagaaggcaacccggtgaactgaaacatctaagtaaccggaggaaaagaaatcga-agagattctgcaagtagcggcgagcga
>non-CPR_non-CPR_Chloroflexi_NC_013523
gatcacg--agt-agggcacatggtggatgcctcggcgcgtggggccgatgaaggacgtggcaggcggcgaaacgcctcggggagccg-cgggcagcagtg-atccgagggtgtccgaatggggcaacccgtcccgggtgatcgggacacccgtcgctgaacgcataggcggcgggggggtaccgggggaactgaaacatctcagtaccccgaggagcagagagc-------attcccgtagtagcggcgagcgaaccgggaggagcccaaaccctg-agcaaccagtcccttagccgaacctgctggaaggggcggccggagacggtgagagcccggtaggcgacgggggggctccgcccgggtgcgtgagtaccgcggggcacgtggaatcccgtgg…
>non-CPR_non-CPR_Chloroflexi_NZ_LT859958
----aagctactaagagcttacggtggatgcctaggcgctaagtgccgacgaaggacgtgggacactgcgataagcctcgggaagctg-tgaacagtgttg-atccggggatgtccgaattgggaaaccagccgttgtgaa-agcggcatcatatgctgaatatataggcatatgaggggaacctggggaactgaaacatctaagtacccagaggaaaagagatt-------attccctgagtagtggcgagcga
>non-CPR_non-CPR_Chloroflexi_NC_017079
gattaagctactaagggcgcacgggggatgccttggcgtcaagcgccgaagaaggacgtgtagcgctgcgataagctgcggggagctg-cgctaagcgacg-atccgcagatgtccgaatggggaaacccggctgggggaatccagtcaacgcatggtgaacacatagc-tgacgtggggaacccagggaactgaaacatctcagtacctggaggagaagaaa-------agattccgtaagtagtggcgagcgaaagcggaggagcccaaaccg----caagggaggttggtagtggaacgtattggaaaagccgaccacagagggtgaaagtcccgtacacaaaactgac-agtgggccgggatcctgagtactgcggggcacg-ctaaccctgcag…
>non-CPR_non-CPR_Chloroflexi_NZ_CP006951
ggtcaagcaggtaagggcacatggtggatgccttggtatcaagagccgatgaaggacgtggtaagctgcgataagcctcggtcagctgcctaacagc--ta-agccggggatttccgaatggggcaacccgctcaggcaaa-ctgagtactcccagctcaacacatagg-gggtagaggtaagtgggggaagtgaaacatctcagtaccccgaggaaaagaaatt-------attctcctagtagcggcgagcgaacggggatgagcctaaaccttt-acaaacc-taaccctattaaaggtccctggaacgggcaaccacagagggtgagagtcccgtaaattaaagggtagcttctgattctttcttaagtaccacgagactcgtggaatctcgtgg…
>non-CPR_non-CPR_Chloroflexi_NC_011831
----aagacatgatgagcacacgatggatgccagggcgctgcgtgccgatgaaggacggggcaggcaccgatatgctccggggagccg-cgtgcagctgtg-atccggagatttccgaatggggcaacccgccaccgcttg------cgctccc----------a-----tgggagcgggaacccggccaactgaaacatctcagtagccggaggaagagcgagc------gacgcccgtagtagcggcgagcga
>non-CPR_non-CPR_Chloroflexi_NC_009767
----aagacagaaggagcacacggaggatgcctcgccgctgcgcgccgatgaaggacgcggcaacctgcgaaaagcgtgggggagccg-cgcgcagctgtg-atcccacgatgtccgaatggggcaacccgtccgtga-ta--cggacacc-----------gc----g-atgcggagggcaccgggggaactgaaacatcttagtaccccgaggaacagacagc-------atccccggagtagtggcgagcga
>non-CPR_non-CPR_Thermobaculum_NC_013525
gggcaagctactacgggcgcacggtggatgccttggcgcctggagccgatgaagggcgtggcaagctgcgataagccgcggtgaggggctgagcagctagc-agccgcggatgcccgaatggggaaacccaccgctat-gg--cggt-accc-------------ggga-accgggaggcaagtcggggaactgaaacatctcagtacccggaggagaagagacc-------attccccaagtagtggcgaacgaaaggggaacagcccaaaccctt-accaagcttgtgtctagcgaagcggtctggaaaggcccaccacagggggtgatagtcccgtacgcgaaaggcgctcctggtgcgacggccggagtaccacggtggaagtggaaccccgtgg…
>non-CPR_non-CPR_Actinobacteria_NZ_CP014232
----ttgtttttttgagcgttcggtggatgccttggcatcaggggccgatgaaggacgtggtggcctgcgatattcctcggggagccggctggcggctgtg-atccgagggtttccgaatggggggacccggcacgagttatcgtgtcacctgcatctgaatgtatag--tgtggggggtgacgcggggaagtgaaacatctcagtacccgtaggagaag----------atattccgtgagtagtggcgagcga
>non-CPR_non-CPR_Actinobacteria_NZ_CP008802
----tggtt-tgtagggcgtttggtggatgccttggtgctatgggccgaagaaggacgttgtagcctgcgatatgcctcggggaattggctagcggtggtg-atccgagggtgtccgaatgggggaacctagcctgggttatcgggttgctgccagctgaattgataggttggtggtgggaacgtggggaagtgaaacatcttagtacctgctggaaaag----------atattttgtgagtagtggcgagcga
>non-CPR_non-CPR_Actinobacteria_NZ_CP011546
tgtt---ct-ttatgggcacacggtggatgcctgggcatgttgagccgatgaaggacgtgtgagtctgcgttaagccttggggagttggcaactagcgttg-atccgaggatgtccgaatggggtaaccctgcacgcgttgttgtgtaaccgccaggtgaatgtatagt-ggttgggggtgacgcggggaagtgaaacatctcagtacccgtaggaagagaaaataataatgattctgctagtagtggcgagcgaacgtggatgaggctaaagcatg------t-gcgatgtgagtgaagtggtctggagtggcctgccgtagagggtgatagtcccgtacatggttgcatcctgttgtgcatgtccccgagtagcagtgggctcgtggaatctgctgt…
>non-CPR_non-CPR_Actinobacteria_NZ_CP008953
ggtcaagttgttaagggcacatggtggatgtcttggcttcaggagccgatgaaggacgtgggaggctgcgatatgcctcggggagctgtcaaccggctgtg-atccgaggatttccgaatggggaaacccagcaccagttatggtgttacccgcatctgaatatatagg-gtgtggagggaacgcggggaagtgaaacatctcagtacccgtaggaagagaaaacaaccgtgattccgtgagtagtggcgagcgaaagcggaagaggctaaacca---a----tgtgctggttagtggaacgccttgggatgggcgaccggagtgggtgagagtcccgtacgcgaaaaccagaccttggtggtgttcccgagtagcagcgagctcgtggaatttgctgt…
>non-CPR_non-CPR_Actinobacteria_NC_021064
gtgcaagttgttaagtgcgatcggtggatgccttggcaccaagagccgatgaaggacgttgtaacctgcgataagccctggggagttggtaaacggctgtg-atccgggggtgtccgaatggggaaacctggaatgagtagtccggtgaccctgccctgaatgtatagg-tgtgggaggtaacgcggggaagtgaaacatcttagtacccgtaggaagagaaaacaaccgtgattccgtgagtagtggcgagcgaaagtggatgaggctaaaccgtg-ataaatgttgcgtgaaggtgaagcgtctgggaaggcgtaccggagtgggtgagagtcccgtaactgtaagcgtgctggtgagggttgccccaagtagcgtggaactcgtggaatttcgcgt…
>non-CPR_non-CPR_Actinobacteria_NC_004572
gattaagctattaagagcaaatggtggatgccttggtatctggagccgaagaaggacgtagcaatctgcgataagcctcgggaagctgataagcggctttg-atccgaggatttccgaatggggaaacctggtggggcgcatcctgtcactcccgcctgaatatatagg-gggcagagggaacgtggggaagtgaaacatctcagtacccacaggaagagaaagcaatagcgattccgttagtagtggcgagcgaaaccggaacaggccaaaccgtg-------caggggtataggtgaatgattttgaacagtcaaccgaagagggtgatagtcccgtaatcgaaatgcccccgcgagaggatatcccaagtagcacgggccccgtgaaatcccgtgt…
>non-CPR_non-CPR_Actinobacteria_NC_014165
agtcaagttactaagggcacacggtggatgccttggcaccaggagccgatgaaggacgtgggagcctgcgataagcctcggggagccggctaccagcgttg-atccggggatttccgaatgggggaacctggcccgagttgtcgggtcgccgccgtctgaacgcatagg-ggttggtgggaacgcggggaagtgaaacatctcagtacccgcaggaagagaaagcaatcgcgattccctgagtagtggtgagcgaaaggggaagaggctaaaccgtg-agaaatcggtgggatagccgaacgctctggaatgggcggccgtagaccgtgagagccgggtaggcgaaatcttgtgcctgggggtgttcccgagtagcacggggcccgaggaatcctgtgc…
>non-CPR_non-CPR_Actinobacteria_NC_013124
--ccaaggtacgaagggccaacggtgaatgccttggcgcctggagccgatgaaggacgtgggcgactgcgataagccatggggagctgtcgaccagcgttg-atccatggatgtccgaatggggaaacccggcgtggggaatcacgtcacccctgcctgaacacatagg-aggaggagggaacggggggaattgaaacatctcagtacccccaggagaggaaagcaaccgcgactcccctagtagcggcgagcga
>non-CPR_non-CPR_Actinobacteria_NC_012815
ggtt---tcgtgatgggcgtatggtggatgccttggcagacagtaccgatgaaggacgtgtggggccgcgatagtcctgggggagccg-ccgacagctttg-atcccagggtgtccgaatggggcaacccgccagccgtcatgctggcacc-------------gcac--gtgcggggggtacgcagggaagtgaaacatctcagtacctgcaggagagg----------atactccgtgagtagtggcgagcgaaagcggatgaggctaaaccgtg-ataaatgcatgcgtgaggcgaaccgggttggataccgggccgtagagggtgatggccccgtagccgtatgcgcgcatggatggtgtctcccgagtagcgcgggactcgtggaatcccgtgt…
>non-CPR_non-CPR_Actinobacteria_NC_008148
cattaagagagtaagggcgtatggtggatgcctaggcaccggaagccgatgaaggacgtggcaagctgcgataagccacggggagccg-caagcggctgtg-atccgtggatctccgaatgggggaacccggcgggggtaatcccgtcacccgcacctgaacacatagg-gcgtggagggaacccggggaactgatacatcttagtacccggaggaaaagaaagaaacctcgattccctgagtagtggcgagcgaaaggggaacagcccaaaccgtt-acaaatcgcgcgggtagccgaacgggtggataatctcggccgtagagggtgatagccccgtaggcgaaactcgatccctgttccggaccctgagtagatccggacacgtgaaacccggatc…
>non-CPR_non-CPR_Actinobacteria_NC_013739
-gtcaagatagtaagggcacacggtggatgccttggcacctagagtcgaagaaggacgtgaacggctgcgataagccgcggtgaggcgctgaatacctttg-acccgcggatttccgaatggggaaacccagcgctggtaatggcgttacctcccggtgaacacatagc-ggttggagacaagcgggggaagtgaaacatctcagtaccccgaggaaagtaaatcaaccgagactccctgagtagtggcgagcga
>non-CPR_non-CPR_Actinobacteria_NC_013170
gatgagat-attaggggcacacggtggatgccttggcatgggaagccgacgaaggacgtggcaagctgcgaaaagctgcggagaggcg-caaacacctttg-acccgcagatgtccgaacggggaaacctgacctgggttatcaggtcggcccatcctgaataaatagggggatgcaggtaacccggggaactgaaacatctcagtacccggaggaagagaaatcaaccgagattgcgcgagtagtggcgagcgaaagcgcacaagcccaaaccgta--tgtgtcatcgttatagcaaaacggcatgggaaggccggccaaagagggtgaaagccccgtatgcgaaatagcgccgagtcatatgacccagagtatcgccgggcacgtgaaacccggcga…
>non-CPR_non-CPR_Actinobacteria_NC_015389
g---aagatgtcacgggcgcacggcggatgccttggcacagggagccgacgaaggacgcgacaagctgcgataagccgcggtgagggg-cacatgcctgcg-acccgcggatctccgaatgggcgaacccgcatggagcag-catgcatcccgggcccgaacacatagg-ccgggaggacaacccggggaactgaaacatctaagtacccggaggagaggaaatcaatcgagatcccccaagtagcggcgagcgaacgggggccaggccaaacc----g----catcgaggggagccgaacggcatgggaaggccgacggcacagggttagagtcccgtaggcgcaccctcg-cccgaacgcggtccctgagtagggccgggcacgtgaaacccggtcc…
>non-CPR_non-CPR_Actinobacteria_NC_013203
g---aagatggtaagggcaaacggtggatgccttggcacaagaagccgatgaaggacgtgataagctgcgataagccacggtaaggag-cacatacctgtg-acccgtggatttccgaatgggtaaacccaccaagagtcatcttggtacttcctgctgaatatatagg-ggatagaggtaaccgggggaactgaaacatctaagtaccccgaggaagagaaatcaaacgagattcccctagtagtggcgagcgaacggggataaggacaaaccgtt-acaaaacttcgtggaagcagaacagtttggaaaaattggcgagacagggtaaaagccccgtacgcgaatctgcg--tcccgagtggcacctgagtactgccggacacgtgaaacccggtgg…
>non-CPR_non-CPR_Fusobacteria_NC_014632
ggttaagatattaagggcacacggagaatgcctaggtaacaagagccgatgaaggacgtgataagctgcgataagctgtggttagctg-caattggcattg-atccgcagatttcccaatggggcaacctgctagattgaag------atc--------------tag--cgaaagaggtaagtgggtgaactgaaacatctaagtaacccgaggaaaataaagtaaaaacgattccctaagtagcggcgagcgaacggggatgagcctaaaccatt-a------aagacgtaactggaaggaattggaaagttccgccgtagcgggtgatagccccgtacaggtaaactct-ttgtgtgttctctcccgagtagcacgggacacgtgaaaccctgtgt…
>non-CPR_non-CPR_Fusobacteria_NC_013515
aaaaagctaattaagggcacatggaggatgcctaggtagtaaaagccgaagaaggacgtgataagctgcgaaaagcttaggggagttg-catatggcgtag-atcctaagatatccgaatggggaaacctacttgttggaa---------------------ggacaag-agagataggtaagctagcgaactgaaacatctaagtagctagaggaaaagaaagtaaaaacgattcccttagtagcggcgagcgaagggggaagagcctaaaacata--tgtatagttaggtaaataaaacaggttggaaagcctggccatagagagtgatagcctcgtatgtgtaaactaatgtataatattaatcccaagtagcatcaagcacgaggaatttggtgt…
>non-CPR_non-CPR_Synergistetes_NC_013522
--ttaaggtattaagggcacgcgggggatgcctaggcgccagatgccgatgaaggacgtagcaagctgcgaaaagccacggggaggcg-caagcgccgttg-atccgtggatttccgaatggggcaacctgccgggagtagtcggcgccct-------------------atggggcgggcactcggcgaagtgaaacatctcagtagccgaaggtaggagaaatcgaagagattccctgagtagtggtgagcga
>non-CPR_non-CPR_Deinococcus-Thermus_NC_015387
ggtcaagatagtaagggcgcacggtggatgcctcggcacc-cgagccgatgaaggacgtggctacctgcgataagcctgggggagccg-gtagcggcgttg-atcccgggatgtccgaatgggggaacccggcccgtgtgaacgggtcatccacgcgctggtgcg-----tgtggaggggaacgtggggaactgaaacatcttagtacccacaggagaggaaagagaaatcgactccctgagtagcggcgagcgaaaggggacgagcctaaaccgtg-ccgaagcccaggtctagccaacccttctgggaaggggggccggagagggtgaaagccccgtaggcgaaaggctg--taggcgagggtacccgagtagcctggggttcgtggagccctgggt…
>non-CPR_non-CPR_Deinococcus-Thermus_NZ_CP011389
ggtcaagataccaagggtccacggtggatgccctggcactg-gagccgatgaaggacgcgattacctgcgaaaagcccgggcgagctg-gagatagctttg-accccgggatgtccgaatggggaaacccacccgcttgcgg------accc------------a-----tgtgggagggaactcagggaactgaaacatctcagtacctgaaggagaagaaagagacatcgattccgtcagtagcggcgagcgaacccggatcagcccaaaccatt-acgattaaccacgccaatcgaagttgctggaaagcgacaccacagagggtgacagtcccgtaggtgaacgcctg-gacggaaggagcacctgagtaggtcgttgttcgtgaaacgatgact…
>non-CPR_non-CPR_Deinococcus-Thermus_NC_014221
ggttaagttactaagggcacacggtggatgcctaggcagtc-gaaccgaagaaggacgtggctacctgcgaaaagcctcggggagttg-gaagcagcggtg-atccggggatatccgaatggggaaacccagcagagcgaa-tctgctacccatacctgaacacatagg-atgaggagggaacccagggaactgaaacatctaagtacctggaggagaggaaagaaaactcgattccgtgagtagtggcgaacgaaagcggaggagcccaaaccgtt--agacccgagtgtttagccaagcgtactggaaaggcgcaccatagagggtgagagtcctgtaggcgaaaggcac-ggcgaggctggcacctgagtagctcaggccacgcgaaatcctgagt…
>non-CPR_non-CPR_Thermotogae_NC_009616
ggtgaaggtattaagggcacgcagtggatgcctaggcggcaggaggcgaagaagggcgtggcaagctgcgaaaagcccgggggagctg-caagcggcgtag-atcccgggatacccgaatgggggaacctgggtagctgaagc----tact--------------cacc-agagggagcgaaccgggggaagtgaaacatctcagtaccccgaggaaaagaaatcaaaagagattccctgagtagaggcgatcgaaaggggaggagcctaaaccgta-aaaaatccttactctagccgaatggtctgggaaggccaaccggagagggtgaaagtcccgtaggcgaaagggta-cctggggcttgatcccgagtaccacgggacacgaggaatcctgtgg…
>non-CPR_non-CPR_Thermotogae_NC_011978
ggtcaaggtactaagggcacgcggtggatgccttggcggcgggaggcgatgaagggcgtggcaagctgcgataagcccgggggagccg-caagcagcgttg-atcccgggattcccgaatggggaaacctgggtggccggag-----cactcgccgccgaaa--------ggcggtgcgacaccgggggaagtgaaacatctcagtaccccgaggaaaagaaatcaaccgagattcccctagtagcggcgagcgaacggggaggagcccaaaccatt-acaaatccctcctctagccgaaccacctgggaaggtgggccggagagggtgacagccccgtaggcgaaaggggaccctgggtcgtgttcccgagtaccacgggacacgtggaatcccgtgg…
>non-CPR_non-CPR_Thermotogae_NC_009828
ggtcaaggtactaagggcatgcggtggatgccttggcgatggaaggcgatgaagggcgtggtaagctgcgataagcctcggggagccg-caaacagctttg-atccggggattcccgaatggggaaacctgattggtcgtaaccagtcgcc-------------------gaaaggtgcgaaccgggggaagtgaaacatctcagtaccccgaggaaaagaaatcaaacgagattccctgagtagaggcgatcgaaaggggaaaagcctaaaccatt-acaaatcttctccttagctgaaccatctgggaagatgggccggagagggtgacagccccgtaagcgaaagggagccttgaactgtgttcccaagtaccgcgggacccgggaaatcctgcgg…
>non-CPR_non-CPR_Thermotogae_NC_017934
ggtaaaggtataaagggctcacggaggatgcctaggtagcgggaggcgaagaagggcgtggccagctgcgaaaagccgcgtgtaggtg-caagcgccatag-aagcgcggatgcccgaatggggaaacccaccaggtagagacttggtatcctg----------a-----aaaggaagcgaaccttgcgaactgaaacatcttagtagcgagaggaaaagaaatcga-agagattccctgagtagcggcgagcgaaacgggaagagcctaaacctgg-gagaagccaaaggctagtcgaactatctgggaagatagaccggagaaggtgaaagtcctgtaggcgaaagttag--ccttgtatatatcccgagtagcgcggggcacgaggaatcccgcgt…
>non-CPR_non-CPR_Thermotogae_NZ_LN824141
--ccaaagtaataagggcatacggtggatgcctagccagctagaggcgaagaaggacgtggccagctgcgaaaagctgcggggagctg-caagcggcaaag-atccgcagatatccgaatggggaaacctgccgaaagg--------catcctg----------a-----aaaggaagcgaaactggggaagggaaacatcttagtacccaggcgaaaagaaatcaaacgagattccctaagtagtggcgagcga
>non-CPR_non-CPR_Dictyoglomi_NC_011661
----------gaaagggcgtacggtggatgcctaggcaccaagggccgaagaaggacgcggcaggcggcgaaacgccccggggagctg-cgagcagctgtg-atccgggggtatccgaatggggaaacccactccgggtaatcggagtatccctaaggggaaac------tagggaggggaaccaggggaactgaaacatcttagtaccctgaggaaaagaaagaaaattcgattccctgagtagtggtgagcga
>non-CPR_non-CPR_Caldiserica_NC_017096
tagtaagttagtaagggcacatggtggatgccttggcgcacggagccgatgaaggacgcagcaagctgcgataggccacggggagctgcaaaacagctgtg-atccgtggatgtccgaatggggaaacccgtgagggtaaa-cctcacatccttgcctgaacacatagggcaaggaggggaaccaagggaactgaaacatcttagtaccttgaggaaaagaaatcaacagagattccctgagtagtggcgagcgaaaggggaacagcctaaaccgtg-agaaataaactgcttagccgaatgctttggaaagagcaaccaaagagggtgatagtcccgtaggcgaaaagcagctcctaggcttgatcccaagtaccgcgggacacgaggaaccctgcgg…
>non-CPR_non-CPR_Aquificae_NC_014926
ggccgaggtgctaagggcacacggtggatgccttggcgccagcaggcgatgaagggcgtggtaagctgcgataagccccggcgaggcg-caaacactgatg-acccggggatgcccgaatggggaaacccggcgggctcaaa-ccgtcatcccgc-tttg-c--------cgggaggcgatacccgccgaactgaaacatctcagtaggcggaggaaaggaaatcaaacgagactccctgagtagcggcgagcgaaaggggaccagcccaaaccgtt-acaaaaggctcgggtagccgaatggcctggaacggtcagccgtagagggtgatagccccgtaggcgaaactcgaccctggggtgcgctcccaagtaccgcgggacacgtggaatcctgcgg…
>non-CPR_non-CPR_Aquificae_NC_013894
gtgcaagttagtaagggctcggggtggatgcctcggctgcccgaggggatgaagggcgtgctaagctgcgataagccgggtggaggcg-cagaaacctgtg-aggcccggatgcccgaatggggaaacccgacagggtttgacctgtcatccgccgtaaggc----------ggagccaaaacgggacgaagtaaaaccttctagtagtcccaggaaaggaaatcaaccgagactccctgagtagcggcgagcgaaaggggatcagcccaaaccgtt-acaaaaccctcacctagccaagtccgctggaatgcggcgccatagagggtgaaagccccgtaggctaaaggtgtccctgggatgcgatcccaagtaccgcggcccccgtggaaggtcgcgg…
>non-CPR_non-CPR_Aquificae_NZ_CP007028
gtgcaagttagtaagggtccggggtggatgcctcggctgcccgaggggatgaagggcgtgtaaagctacgataagccgggtggaggcg-caaaatcctgtg-aggcccggatgcccgaatggggaaacccggcagggcttgacctgtcatcc--cgttaagc----------ggagccgatacggggcgaagtaaaaccttctagtagccccaggaaaggaaatcaaacgagactccccgagtagcggcgagcgaaaggggaccagcccaaaccgtt-acaaaacttccacctagccaagtgagctggaatgctccgccatagagggtgaaagccccgtaggctaaaggtgacccgggggtacgatcccaagtaccacggccctcgtggaaggtcgtgg…
>non-CPR_non-CPR_Aquificae_NC_013799
gtgcaagttagtaagggtccggggtggatgcctcggctgcctgaggggacgaagggcgtgttaagctgcgataagccgggtggaggcg-caaaaacctgtg-aggcccggatgcccgaatggggaaacccggcagggtttgacctgtcatc---cgccgatt--a-----ggcggagcctaacgggacgaagtaaaaccttctagtagtcccaggaaaggaaatcaaacgagactccccaagtagcggcgagcgaaaggggaccagcccaaactctt-acaaaacttccgcttagccaagtgagctggaatgctccgccacagagggtgaaagccccgtaggctaaaggtgacccggggatgcgatcccaagtaccacggcccccgtggaaggtcgtgg…
>non-CPR_non-CPR_Gemmatimonadetes_NC_012489
agtcaagcgaacgaaagtatgtgggggatgcctgggcacatagaggcgatgaaggccgcggtaagctgcgataagctcgggggagcgg-cacacagcattg-atcccgagatggccgaatggggaaacccggcggggcgcgacccgtcaccg----------------c-aagcggagcgaaccaggggaactgaaacatctaagtaccctgaggaagagaaatcaaacgagatgccctgagtagtggcgagcgaaacgggtacaggccaaaccg----------atgacgtcagtcaagtctcctggaacggagcgccaaagacggtgatagcccggtaggcgaagattat-tcgtagtagagttcctgagtaacgcccgacccgagtaatcgggcgt…
>non-CPR_non-CPR_Fibrobacteres_NC_017448
atttaagcgaaggaatgcacgcgggggatgcctaggcatccgccggcgacgaaggacgggccaagccccgaaagtccggtacgaggcg-caaaggcctttg-actaccggggttccgaatggggaaacccacgcgcaagcgt-------cctctagatgaatacatagt-agcggaggcaaacccggggaactgaaacatctcagtacccggaggaaaagaaatcaaccgagattcccgtagtagtggtgagcgaaccgggaggagcccagacgg----------ggattgcgagcgaagcgggatggaaagcccccccacagcaggtgacaggcctgtagcgagcaagaaa--gtccgtcgaa-----gagtagggcgggacacgtgaaatcctgcct…
>non-CPR_non-CPR_Calditrichaeota_NZ_CP018099
ggttaagttgctaagggcatacggtggatgcctaggcacgaggaggcgaagaaggacgtggtaagctgcgaaaagccacggggaggtg-cacacaccttag-atccgtggatttccgaatggggcaacccggctccggtaatggagtcatcctgacgtaagt----------gggaggcgaacccagggaactgaaacatctaagtacctggaggaaaagaaaacga-agtgattctctgagtagcggcgagcgaaaggggaatagcctaaaccttt-acaaaacctaaagatagtcaagctggctggaacgccacaccgtagagggtgaaagtcccgtaggcgaaatttttccatacattgcacacccgagtaccgcgggacacgaggaatcctgtgg…
>non-CPR_non-CPR_Ignavibacteriae_NC_018178
ggctaagttactaagggcatacggtggatgccttggcacaatgaggcgatgaaggacgcggctaccggcgatacgccacgggaaggtg-gaagcacctagg-atccgtggatttccgaatggggcaaccctcctcgagtaatcgaggaactctcgcttgaatccataga-gagtagagccaacccggggaagtgaaacatctcagtacccggaggaaaagaaaacaatagtgatttcctgagtagtggcgagcgaaagggaaaaagcctaaaccgtc-aaaaattgtattgttagctgaatgttctggaaagttcaaccacagagggtgatagtcccgtaagcgaaaacaattcctggaaagcgctcccaagtagcacggaataagtggaagtctgtgc…
>non-CPR_non-CPR_Bacteroidetes_NC_013501
gattaagtaggtaagggcgcatggtggatgcctcggcatgggcaggcgatgaagggcgtggcaagctgcgataagccgcggggagccg-caagcagctgtg-atccgcggattcccgaatggggcaacccggccggtcgaagcggtcatccacgggctgaatccatagg-cgtggaggcgaacccggggaactgaaacatctcagtacccggaggaaaagaaagcaaccgcgattccctgagtagtggcgagcgaaaggggaacagcccaaaccgtg--ggatcggaaggtgaagtcaagcgtgctggaaagccgcgccatagagggtgatagccccgtaggcgtaagccga--ctcggcggtgtccctgagtaccacgggaccggtggaatcctgtgg…
>non-CPR_non-CPR_Bacteroidetes_NC_020510
aaaaagcgaataaagagcgtatggtggatgccttggctctgagaggcgaagaaggacgtgataagctgcgataagctgcgggaattgg-cacataaaattg-atccgcagatttccgaatgggggaacctatcatatttaatgatattactttt----------------atgtaaggcgaacctagagaactgaaacatctaagtatctagaggaagagaaaacaatagtgattctgttagtagtggcgagcgaaagcggaatagcccaaaccataaaaaaaatttttttatagcagaatgatttggaaaaatcaatcatagaaggtgataatcctgtatgcaaaatggaatttataagtagggacctgaataggacgggacacgggaaatcttgtct…
>non-CPR_non-CPR_Bacteroidetes_NZ_CP011071
gacaagcaagagaagggcgtatgggggatgcctaggctcccagaggcgaagaaggacgtgataagctgcgaaaagccgcggggatcgg-cacatagaattg-atccgcggatttccgaatggggcaacccggcatgctgaagatgtcaccccgc----------attg--gcggggggcgaacccgccgaactgaaacatctaagtaggcggaggaggagaaaacaagagtgattccgtgagtagtggcgagcgaaagcggagcagcccaaaccatt-gcgtg--cgcgacgaaccggaagcagttggaaagctgcgccatagcgggtgagagccccttacgggcaagggac--gcatagtggtatcctgagtagcgcggggcacgtgaaaccctgtgt…
>non-CPR_non-CPR_Bacteroidetes_NC_015144
aaaaaagttacaaagggcgtacggcggatgcctaggctctcagaggcgatgaaggacgtgataagctgcgataagctgcgggtattgg-cacatagattcg-atccgcagatttccgaatggggcaacccgtcaggttgaagctgacacctatt----------a-----aataggggcgaacgtggggaactgaaacatctaagtacccataggaaaagaaatcaattgagattccgtcagtagtggcgagcgaacgcggattagcccataa--------------aagtttaacagaataacctggaaaggttaaccgtagaaggtgatagtcctgtacgtgaaaggctt-------at-tgatatcgagtaaggcgggacacgtgcaatcctgttt…
>non-CPR_non-CPR_Bacteroidetes_NZ_CP012938
aagaaagtaagcaagggcgcatggcggatgccttggctctcggaggcgatgaaggacgtgataagctgcgataagcttcgggcaggtg-caaatacctttg-atccgaagatttccgaatgggacaacccgtcattctgaagatgac-atct----------gca-----gcaagaggctaacgcagggaactgaaacatcttagtacctgtaggaaaagaaaataataatgattcccctagtagtggcgagcgaacggggattagcccaaaccatc-gcaagaaatttagtgagaagaattctttggaaaatgaaaccatagacggtgatagtccggtattcgaagctaaa-agcgtagtggtatcctgagtagcgcgggacacgaggaatcttgcgt…
>non-CPR_non-CPR_Bacteroidetes_NZ_HG934468
aagaaagtagagaagggcgtacgggggatgcctaggctcttataggcgaggaaggacgtgttaagctgcgataagcttgggggattcg-caaaaagaattg-atcccgagatttccgaatggggcaacccggttggctgaagcaatcacact------------------aaagtgagcaaacccactgaactgaaacatctaagtaagtggaggagaagaaagaaacatcgattcccagagtagtggcgagcgaaatgggaatagcctaaaccgtg--aagcagacaatgaacgagaacacaactggaaagttggacgatatagggtgatagtcccgtattggtaagttgg-tggatagtagtatcctgagtagggcgggacacgtgaaatcctgtct…
>non-CPR_non-CPR_Bacteroidetes_NZ_CP007035
tttaaagcaattaagggcgtatggtggatgcctagggtctgagaggcgatgaaggacgtggtaagctgcgataagctcgggggaactg-cacacagtattatatcccgagatttccgaatgggacaacctgctatactgaagatagcactcagc----------------aatgagagccaacccggagaactgaaacatctaagtacccggaggaaaagaaaataaaaatgattccctaagtagtggcgagcgaacagggaagagcctaaaccaagaa----atcgttatcaagcagaatcttttggaaaattgagccaaagcgggtgatagccccgtaagcggaaattaa-ggacgtgtagtatcctgagtagggcgggaccggaggaatcctgctt…
>non-CPR_non-CPR_Bacteroidetes_NC_015510
aagaagcaaaacaagggcatacgggggatgcctaggctctcagaggctacgaaggacgtggtaagctgcgaaaagctacggggagttg-caaacagcgttg-atccgtagatgtccgaatggggaaacctggctggttgaagcagtc-------------------------gacacgcaaacccagggaactgaaacatctaagtacctggaggaaaagaaaacgaagttgattccgtaagtagtggcgagcgaaagcggacaagcccattaca----------------------aatggtcctgggaagaccaaccaaagggggtgatagtcccgtacacgaaagtcta-------ttagtgaattgagtagggcgggaccggagaaatcctgcct…
>non-CPR_non-CPR_Bacteroidetes_NC_018018
----aagtatttaagggcgcacgggggatgcctaggttctgagaggcgatgaaggacgtgccaagctgcgaaattttacggggagttg-ctaagaacgctg-atccgtaagtatccgaatggggcaacccacctgtttacag------attc----------------c-aaggaaagcgaacgaggggaactgaaacatctaagtaccttcaggaagagaaaacaaaagtgataccgcaagtagtggcgagcga
>non-CPR_non-CPR_Bacteroidetes_NZ_CP017141
aagaaagtaattaagagcacacaggggatgccttggctctcagaggcgatgaaggacgtgataagctgcgataagcttcgggtattag-caaatagaatta-atccgaagatttccgaatggggaaacctggctagttgaagt----agtc-----------gta-----aatgtacgcaaacctgccgaactgaaacatctaagtaagcagaggaagagaaaataataatgatttcctaagtagtggcgagcgaaagggaaagagcccaaaccatg--gtatactaaaatgaagtggaacaggatgggaagcctggcaatatagcgtgagagccgcgtacacgtaagtaat-aacctagtagtatcctgagtaccgcgaggtcggagacgccttgtgg…
>non-CPR_non-CPR_Bacteroidetes_NZ_CP013909
agcgaagtaagcaagagcacacgggggatgcctagggtctgagaggcgacgaaggacgcgataagctgcgataagctcgggggagggg-cacataccgtta-atcccgagatttccgaatggggcaaccccttggttggaagccaagagccg----------acgttga-cgcggcggcaaacgccgagaactgaaacatctaagtaccggcaggaaaagaaaataacaatgattccccaagtagtggcgagcgaacggggaggagcccaaaccgtg--tgatgaatcgaggtagccgaagtgcttgggaaagcacatcagagagggtgaaagtcccgtaggcgacacttctcacgctagcgataccctgagtagggcggggccggagaaaccccgtct…
>non-CPR_non-CPR_Bacteroidetes_NC_015914
----aagtgaacaagggcgtacgggggatgcctaggctctaggaggcgaagaaggacgtgccaagctgcgaaaagctgtggggatcgg-cacagtgaattg-atccacagatgtccgaatggggcaacccatcccgatttatcggat-attccg----------a-----aaggaaggcaaacgcggggaactgaaacatctaagtacccgcaggaagagaaaacaatagtgattccgtcagtagcggcgagcgg
>non-CPR_non-CPR_Bacteroidetes_NC_013037
-gcaagcgaattaagggcgcatgggggatacctaggctctcagaggcgatgaaggacgtgataagctgcgaaaagctatggggagcag-cacatagcattg-atccatagatatccgaatggggcaacccagtcaggtgaa-ctgattacc-------------------acggggggcaaacgcggggaactgaaacatctaagtacccgcaggagaagaaaacaatagtgattccgtaagtagtggcgagcga
>non-CPR_non-CPR_Bacteroidetes_NC_018605
----aaataaataagggcgtatgggggatgccttggctcttagaggcgatgaaagacgtgataaactgcgataagttgcggggattgg--ttgtagatttg-atccgcaaatttctgaatggggcaacccaccctatcatag-agggtatcttt----------atta--aaaggaagtaaacctggagaactgaaacatctaagtatccagaggaaaagaaaacaaaagtgattccataagtagtggtgagcga
>non-CPR_non-CPR_Chlorobi_NC_007512
ggttaagttactaagggcgtacggtggatgccttggcacaagaaggcgaagaaggacgtggttaactgcgaaaagctgcggggaggcg-taaacaccgaat-atccgcagatgtccgaatggggcaacccacctctatgagg-----tatcccg----------a-----aagggaggctaacccggggaagtgaaacatctcagtacccggtggaaaagaaaacaaaagtgatttccccagtagcggcgagcgaaaaggaaagagcccaaaccgcg--tgacaggaatcgatagcagaattacctggaaaggtaagccaaagaaggtgacagccctgtaagcgaaatcgtg-tgcataggaggatcctgagtagcacggggtacgtgaggtcctgtgt…
>non-CPR_non-CPR_Elusimicrobia_NC_020419
gaccaagctaataagtgcatatggtgaatgccttggctaagactgtcgatgaaggacgtggtaagctgcgttaagcgtcgggtaggtg-caaacacctttg-atccggcgatttccgaatggggtaacccactgcagagtaatgcagtatc-------------------agaggaaggcaacccggggaagtgaaacatctcagtacccggaggaaaagaaatcaatcgagataccgaaagtagtggcgagcgaaatcggtatagcctaaactata--ccaatcaaaaaactaattaaacggtttggaaagtccgaccatagaaggtgaaagtcctgtaagtgaaagttttactcgaagcggtatcctaagtaccgtcggacacgtgaaatccagcgg…
>non-CPR_non-CPR_Elusimicrobia_NC_010644
ggtcaagct-acaaaggtgtatggtgaatgccttggtgccagaagtcgatgaaagacgtgataagctgcgataagcctcgggtaggag-caaatacctata-atccggggatttctgaatcggggaaccgttatgggtgtgaccataaatcataacttgaatacatagg-tatagaagacaacccagggaagtgaaacatctcagtacctggaggaaaagaaatcaa-agagattccgtaagtagtggcgagcgaaagcggaaaagtccaaaccgta--ccaatctggaagttagctgaacggtctggaaagtccgaccatagaaggtgatagtcctttaagcaaaaacttaactcttaacaagtacctgagtactgccgggcacgtgcaatccggtag…
>non-CPR_non-CPR_Planctomycetes_NC_015174
ggtcaagctattaagggcacatggtggatgcctaggcgttagaag-----aaagagcgtggaaggctgcgaaaagcctgggggagccgtcaaacagcattg-atcccggggtactct------------------------------------------------------------gtcaacgtggggaactgaaacatctaagtacccacaggaaaggaaag-aaattcgactccctgagtagcggcgagcgaaatgggattagccga-----tt-acaaagtaaactgctaaaagaagttgttggaacacaacaccacagagggtgagagtcccgtatttgaaagctga-ctcttcagt----cataattaggacctggcacgtggaaccaggttt…
>non-CPR_non-CPR_Planctomycetes_NC_013720
ggtcaagctattaagggcacatgggggatgtcttggcgtcagaaggcgacgacgggcgtggaaaactgcgaaaagctaggggtagctgttaaacagttgtg-atccctagattccctaat---------------------------tattgcatactgaatccataggtatgcaaggccaacccagggaactgaaacatctcagtacctggtggaaaagaaagaaaaatcgatttcgttagtagcggcgagcgaaagcgaaagagcccaaaccgta--caaagtcattgactaacagaatggcaaggaaaggccaaccacagagggtgacagtcccgtaagtgaaagtcattctctcgagcggtacctgagtaagtcgagtcacgtgaaacctcgact…
>non-CPR_non-CPR_Planctomycetes_NC_014962
----aagtc-gtaagggcgtgggggggatgcctaggcgtcatctggcaa--gcgggcgttgcaggctgcgatatgctcggggaagtggccaaccagcattg-atcccgagatccccgc-----------------------------------------------------------tggaacccagggaactgaaacatctcagtacctggaggaaaagaaatcaaccgagactccctcagtagcggcgagcga
>non-CPR_non-CPR_Planctomycetes_NC_017080
gagcaagctcgtaagggcgtgtggtggatgccttggcgtcaagaggcgatgaaagacgtgagaacctgcgatatgcctcggggagctggtaactggctttg-atccgaggatttctgaatggggaaacccggccacatctg--tggtcacctgcggaggaatgcatatgccgcaggagcgaacctggcgaactgaaacatctaagtacccagaggaaaagaaagcaaccgcgattccggaagtagcggcgagcgaaaccggacaaactcacagc------------------------------tttgaaagatggaccgcagagggtgccagtcccgtagcgacgagtgag-----------gccctagagtaaggtcgagcccgtgaaactcggcct…
>non-CPR_non-CPR_Chlamydiae_NC_015713
gattaagctattaagagctattggtggatgccttggcatcgacaggcgatgaaggacgcgcgtacctgcgataagcttcggggagctg-gatagagcattg-aaccgaagatttccgaatgggggaacccagtggagttagttccactattcctacctgaatacatagg-tggaaagcaatacctgctgaattgagacatctaagtaggcagaggaaaagaaatcaattgagattcccgtagtagcggcgagcgaagtgggaagagcccaaaccgaa-agcttaagtggacttagcataatcatctgggaaggtgagcgatacagggtgaaagccccgtgtgcaaagagaaa-agtgagattagcacctgagtagggccggacacgtgaaacccggtct…
>non-CPR_non-CPR_Chlamydiae_NC_002620
gaccaagttgataagagctattggtggatgccttggcattgacaggcgatgaaggacgcgaatacctgcgaaaagctccggcgagctg-gtaatagcaaag-acccggaggtgtccgaatggggaaacccggtagagt-aattctaccattgtatactgaatacatagg-tgcaaagcaacacctgctgaactgaaacatcttagtaagcagaggaaaagaaatcga-agagattccctgtgtagcggcgagcgaaaggggaagagcctaaaccgtaaaggatcaagattcctagttgaaccatctggaaaggtggatgaaacagggtgatagtcccgtagacgaaaggagagaccgacctcaacacctgagtagggctagacacgtgaaacctagtct…
>non-CPR_non-CPR_Kiritimatiellaeota_NZ_CP010904
-gccaagttgcaaagggcgcatggtgaatgccttggtaccggaaggcgatgaaggacgtgctaagctgcgaaaagcctcggggagcgg-caaagagctctg-atccggggatgtcctaatggggaaacccggccctggtaatggggtcactggagtctgaataaatagg-ttcagggcgatacccggggaactgaaacatctcagtacccggaggaaaagaaagcgacagcgattccctaagtagtggcgagcga
>non-CPR_non-CPR_Verrucomicrobia_NZ_LM997411
agttaagcaaacaagggcacatggtggatgccttggcgccaggaggcgatgaaggacgtggctacctgcgataagcctcggggagtgg-gaagcagctttg-atccggggatttccgaatggggtaacccggtacgagtaatcgtaccataccaggttgaatccatagacggataagcgaaacccgctgaagtgaaacatctcagtaagcggaggaaaagaaagcgaaagcgattccgttagtagtggcgagcgaaagcggaacagcctaaaccata-ggcagttgtagagctaggagaagcggatggaaagtcgccccatagaaggtgagaggcctgtatcttaaagcttg-cgcctggtggtatcctgagtaacgcgatgcacgggaaacttcgcgt…
>non-CPR_non-CPR_Verrucomicrobia_NC_010571
----aaaccagttacagcaattgatggatgccttggcttcatcaggcgacgaaggacgcagcaagctgcgataagcttcggggagcgg-cacgcagctttg-atccgaagatttccgaatggggaaacccggcaccgtttacggtgtccctccggtgtgaattcatagcaggtagagcgatacgcggcgaagtgaaacatctcagtaaccgcaggaaaagaacgaga-atcgattccgtcagtagtggcgagcga
>non-CPR_non-CPR_Verrucomicrobia_NC_014008
----aaactgttacgggcaattagtggatgccttggcactatgaggctacgaaggacgtggtaagctgcgataagcttcggggagcgg-caaatagctttg-atccggagatctccgaatgggaaaacccggctgtcttaatgcagtcattcatatctgaacacatagg-atggaagtcatacccgctgaattgaaacatctaagtaggcggaggaaaagaaagcgaatgcgattcggttagtagcggcgagcga
>non-CPR_non-CPR_Verrucomicrobia_NZ_LT629973
----aagaaaccaagggcttacggagaatgccttggtgccaacaggcgaagaaggacgcaacaagctgcgaaaagcctcggagagctg-caagtggctaag-acccgggggtatccgaatggggtaacctgattccggtaatggaatcgaccttatctgaatacataggaaggaacgcgacacccgctgaagtgaaacatctcagtaagcggaggaaaagaaagagaaatcgataccgtaagtagtggcgagcga
>non-CPR_non-CPR_Acidobacteria_NC_016024
ggttaagcaagtaagggcgcttggtggatgccttggcgcatacaggcgatgaaggacgtggctagctgcgataagcctcgtggagccg-caagcagcagtg-atacggggatttccgaatggggtaacccagcctcttagagt-----gcc-----------ccg-----aggggcggcgaacccagggaagtgaaccatctcagtacctggaggaaaagaaaacaaccgtgattccctgagtagcggcgagcgaaacgggaagagcctaaaccatt-accaaacaacgtgttagccgaagtgcttggaaaagcacgccaaagaacgtgaaagccgtgtaagcgaaaacacgttctggaagcactacccgagtaacgcgggacacgtgagatcttgcgt…
>non-CPR_non-CPR_Acidobacteria_NC_015064
ggtcaagctactaagggcgcacggtggatgccttggcagaaacaggcgatgaaggacgtggcaagctgcgataagcttcggggagccg-cacacagcgttg-atccggagatttccgaatggggaaacccacctgggcaaa-ccaggtatcaccaactgaatacatagg-ggatgaagcgaacggagggaagtgaaccatctcagtacctccaggagaagaaagaaacctcgattccgagagtagtggcgagcgaaatcggatgagcccaaaccctt-accaatctggtcgctagctgagtcctctggaaaggggaaccaaagagcgtgacagtcgcgtaggcgaaagtgatactcgaagcaggtacctgagtaaggcggggcacgagaaaccctgctt…
>non-CPR_non-CPR_Nitrospirae_NC_018649
gttcaagcgacaaagggcagacgggggatgccttggcagcagtaggcgaagaaggacgcggcgagctgcgaaaagctccggggagtcg-ctcacagcgttg-atccggaggaatccgaatgggggaaccccgctggggtcatccagcgagccacatctgaatccatagggtgtggcggcgaacccggggaagtgaaacatctcagtacccggaggaagagaaatcaagcgagattccccaagtagtggcgagcgaacggggaagagcccaaacctcg-gttccgaagggcgttaggcgaacggtctggaaaggccgaccagagagggtgacagtcccgtagtcgaaagcgcg-gccgacttgtgatccggagtaccaccgggcccgagaaacccggtgg…
>non-CPR_non-CPR_Nitrospirae_NC_014355
tgttaagctactaagggtgtacggtgaatgccctggcatcagaaggcgatgaaggacgtagctagctgcgataagccccggggagccg-caagcagccgtg-atccgaggatgtccgaatggggaaacccaggcgatg-aat-cgcctatcctctgctgaatacatagg-gtgagaagcccacgcagggaagtgaaacatctcagtacctgcaggaaaaaaaatcaatcgagattcccccagtagtggcgagcgaaaagggaacagcctaaactatt-acaaattaggatcgtaacagaatagtctggaaaggctgaccagagaaggtgacagtcctgtatgtgaaacgatccgttgaatggaggtcctgagtaccacggggcccgagaaaccttgtgg…
>non-CPR_non-CPR_Nitrospirae_NC_011296
-gtcaagatactaagagcatacggtggatgccttggcaccagacggcgatgaaggacgcggtgggcggcgaaatgccacggggagttgcctaacaactatg-atccgtggatctccgaatggggtaacccacctggataaa-ccaggtatcataggctgaatacatagg---atgaggcaaacccggggaagtgaaacatctcagtacccggaggaaaagaaatcaaatgagattccctcagtagcggcgagcga
>non-CPR_non-CPR_Thermodesulfobacteria_NZ_AP014945
agccaagctactaagggctgatggtggatgcctcgggtgcgggaggcgatgaagggcgtggtaagctgcgataagctccggggagccg-cacacagcattg-atccggagatgcccgaatggggaaacccggcaggggtaa-cctgtcatc---tacaggtt--agag--gtagaagcgacaccgggggaagtgaaacatctcagtaccccgaggaaaagaaatcaaccgagattctccgagtagcggcgagcgaaaggggagaagcctaaaccatt-acaaaatctctctttagccaaggcgcctgggaaggcctgccagagagggtgaaagccccgtaggcaaaaaggagccctgggtgtagatcccgagtagcacgggacacgaggaatcccgtgt…
>non-CPR_non-CPR_Thermodesulfobacteria_NC_015681
ggccaagctactaagggccagcggtggatgcctcgggcgcaggaggcgaggaagggcgtggcaagctgcgaaaagccacggggagccg-caagcagcgttg-atccgtggatgcccgaatgggggaacccggccagggtaatctggtcatc---cgctaggttaagagc-ggcggaggcgaacccggggaagtgaaacatctcagtacccggaggagaagaaatcaaacgagattccctgagtagcggcgagcgaaaggggaggagcccaaaccgta-agaaaacgcttggctagccaaggcacctggaatggtccgccgtagagggtgagagccccgtaggcgaaagctgaccctgggtgtgctacccaagtagcacggggcacgaggaatcccgtgt…
>non-CPR_non-CPR_Chrysiogenetes_NC_014836
----aagttatcaagggcatacggtggatgccttggcaccaggaggcgaagaaggacgcgctaacctgcgaaaagttccggcgaggtg-gtacgacctttg-acccggaaatatccgaatggggcaacccactgggagtgatcccagtattgcatggtgaattcatagccatgcaaggcgaacgcggggaactgaaacatctcagtacccgcaggaagagaaatcaaccgagattccgtcagtagcggcgagcga
>non-CPR_non-CPR_Deferribacteres_NC_015672
ggtcaagctactaagggcagatggggaatgccttggcggtggccggcgaagaaggacgtgtcaagctgcgaaaagctacggttagctgctaaagagcatgg-aggaggatatcgccatttaagggagcgcattaagcatagtggaag-attt--cgtgtgataaataagggcgggaggccaacccggggaagtgaaacatctcagtacctggaggaagagaaaacaacagtgattccgtaagtagcggcgagcgaacgcggacgagcctaaaccgtatacgtattatatttatagcagaataatctggaaagattagccacagagggtgatagccccgtaagcgaaatagatatgttagcggagatcccgagtaccacgggataagaggagccttgtgg…
>non-CPR_non-CPR_Deferribacteres_NC_014758
ggtcaagctactaagggcaaacgggggatgccttggcggtggatggcgatgaaggacgtgtcaggctgcgaaaagcctcggggagctg-ccaaaggcgttg-atccggggatttccgaatggggaaacctgtccatggtaatatggacgcc-------------------agagggagcgaacccagggaagtgaaacatctcagtacctggaggaagagaaagaaaattcgattccgtaagtagcggcgagcgaaagcggaagagcctaaaccgtg--gtactctgaatcttagcagaacagtctggaaagtctggccatagagggtgaaagccccgtaagcgaaaagaggaggcctagcgggaccccgagtaccacggagtaagaggaattctgtgg…
>non-CPR_non-CPR_Spirochaetes_NC_015385
ggccaagcgagaacaggtccatggcggatgccttggggccgcaaggcgatgaaggccgcggcaagctgcgaaaagcccgggggaggag-cacacacctgtg-atcccggggtagccgaatggggcaacccgcgcgccgggag-gcgc-acccgcgggcgaataaatagc-ggcggagccacaccgcgtgaagtgaaccatctaagtaac-gcgggagaagaaatcaacagagattccctgagtagcggcgagcggaaggggaggagcccaaaccgga-acgaatcggacgcgcagcggaaggagccggagagctccgccggagagggtgacagccccgtacgcgcaacgcgc-ccgtgatgcggtgcctgagtagggcggggcacgaggaaccctgcct…
>non-CPR_non-CPR_Spirochaetes_NC_014364
ggtcaagcgaataagggtccacggtgaatgccttggagctgtctggcgaggaaggacgtggtaagctgcgaaaagtcccggggaggag-caaacactgctg-atccggggatgtccgaatggggtaacccggccgtttagat-cggtcactgtacggtgaatccatagc-tatggagcgagacgcagggaactgaaccatctaagtacctgcaggaagagaaatcaaacgagattccctaagtagcggcgagcgaaaggggaagagcctaaaccttg-ataaaacaattgtatagcggaatctactgggaagggcagccagagagggtgaaagccccgtatgcgaaatagaagcgtgggagacgagcttgagtacgacgggacacgaggaatcttgtcg…
>non-CPR_non-CPR_Spirochaetes_NZ_CP003679
ggtcaagcgaatagtggtttacggtggatgtcttggagttgtcaggcgatgaaggtcgtgataagctgcgaaaagcctcggggaggag-cacatgcctgtg-atccggggatgaccgaatggggtaacccgacagggtaaag-ttgtcattccttcctgaatgaatagggggtaaggcgaaactgggtgaactgaaccatctaagtaacttg-ggaaaagaaatcaagagagattccgaaagtagtggcgagcgaaattggaggagcctaaaccttgaaataatccggcctatagcaaaaggttttgggaaagcctgacagagagggtgaaatccccgtatgcggaatggggctgctggtgcggtacctgagtacggcgggacacgaggaatcctgtcg…
>non-CPR_non-CPR_Spirochaetes_NC_015921
ggtcaaagtaataagagtctatggtgaatgcctaggagctttaaggcgaagaaggtcgtggtaagctgcgaaaagcttgggggagaag-caaacattattg-atcccaagattaccgaatggagtaatccagctagcaagat-tagttatctttatttaaat--a-----atagaggcgataccaggggaagtgaaccatctaagtaccctgaggaaaagaaatcaa-agagattcccttagtagtggcgagcgaaaagggagtagcccaaactttt-acaaaatatttatatagaagaataatctggaaagattaaccaaagaaggtgatagtcctgtaatttaaatgtaa-tttttaaaatgttcctgagtaggacgaggcacgagaaaccttgttt…
>non-CPR_non-CPR_Spirochaetes_NC_018020
ggtcaagtatttaagggcgtacgaaggatgccttggcactaccaggcgatgaaggacgtggttacctgcgatatgtcccggtgagctg-gaagcagctttg-acccgggaatctccgaatgagaaaactctgtacggcaaaagtataaactccg-----------caa--ggagtggctaaactcagggaattgaaacatcttagtacctgaaggaaaagaaagtaaaaacgatttcgttagtagcggcgagcgaacgcgaaagagcctaaaccgtt-accaaattgccatgtaagagaagtgtttgggaaaacacgccatagcgggtgatagccccgtatctgaaacatgt-ctttgagccagtacctgagtaccacggagtacgtgaagttccgtgg…
>non-CPR_non-CPR_Spirochaetes_NC_008508
ggtcaagtaagaaagggcgtacgggggatgcccgggcatcaggacgcgatgaaggacgtggctttctgcgataagcgacggggagttg-taagcagcattg-atccgttgatttccgaatggggcaaccctctcaggt-aa-------------ctctgagaacg-----aatgcgagcaaagtcggggaattgaaacatcttagtacccggaataaaagaaagtaaaaacgattccgtcagtagcggtgagcgaacgcggacgagcctaaaccttt-accaaacacaagattagcagaacgtattggaaaagccgaccatagagggtgaaagtcccgtaagcgaaaatttttctttggccagtatcctgagtaccacggaacacgtgtaattcagtgg…
>non-CPR_non-CPR_Spirochaetes_NZ_CP015217
ggtcaagtaagaaagggcgtacgggggatgcccgggcatcaggacgcgatgaaggacgtggctttctgcgataagcaacggggagttg-taagcagctttg-atccgttgatttccgaatggggaaaccctcttaggt-aa-------------ctctaagaacg-----aatgcgagctaagtcggggaattgaaacatcttagtacccggaataaaagaaagtaaaaacgattccgtcagtagcggtgagcgaacgcggatgagcctaaaccttt-accaaacacaagattagcagaacgttttggaaaagccgaccatagggggtgaaagtcccgtaagcgaaaatttttctttggccagtatcctgagtaccacgaaacacgtgtaattttgtgg…
>non-CPR_non-CPR_Spirochaetes_NC_019908
ggtcaagtaagtaagggcttaaggtggatgcctaggcactggaaggcgatgaaggtcgtgacaagctgcgataagctacggggagaag-caaatatctatg-atccgtagatcaccgaatgggaaaacctatagaagtaaa-ttctatattatacactgaatccatagg-tataaggcaacacccagggaactgaaacatctaagtacctggaggaagagtaatcaaaagagattccctcagtagtggcgagcgaaaggggaagagcctaaaccg---acgactatatatgatagtggaacgttttggaaaagcaggccatagtgggtgatagccctgtacacgaaatcataaaggttttgtcgttcctgagtagggcggggcacgtgaaaccctgttt…
>non-CPR_non-CPR_Proteobacteria_NZ_CP012196
----aagctactaagagcgaacggtggatgccttggctagtagaggcgatgaaagacgtgccagactgcgataagtctcggggagccg-tcaagggctttg-atccgggaatttctgaatggggcaacccaatacatagcgatgtgttacc-------------a-----taatggagccaacgcggggaactgaaacatctaagtacccgcaggaagagaaatcaatagagattacgctagtagcggcgagcga
>non-CPR_non-CPR_Proteobacteria_NZ_CP020478
----aagctactaagagcgaatggtggatgccttgactggtaaaggcgatgaaggacgtactagactgcgataagctaggtagagctg-tcaagagctttg-atgcctagatttccgaatggggcaacccaatgtatagagatacattacc-------------a-----taatggagcgaacgaggggaattgaaacatcttagtaccctcaggaaaagaaatcaaaagagattgcgtcagtagcggcgagcga
>non-CPR_non-CPR_Proteobacteria_NZ_CP020867
aggtaagctatgaagagcaaatggtggatgccttgactggtaaaggcgatgaaggacgtactagactgcgataagctacggggagctg-tcaagagctttg-agccgtagatgtccgaatggggcaacccaagatatagagatatcttacc-------------a-----taatggagcgaacgaggggaattgaaacatcttagtacccttaggaaaagaaatcaatagagattgcgtcagtagtggcgagcgaaagcgtaacagggcaaacct---ggaaggaatgagtttagcagaacactctggaaagtgtagccatagagggtgatagtcccgtatgcgaaaaacaactacctagcagtatcctgagtagggcgggacacgtgaaatcctgcct…
>non-CPR_non-CPR_Proteobacteria_NC_000915
aaacaagcttttaagagcagatggcggatgccttgccaaagagaggcgatgaaggacgtactagactgcgataagctatgcggagctg-tcaagggctttg-atgcgtagatgtccgaatggggcaacccaactaatagagattagttactctt----------a-----atagagagcgaacctagtgaagtgaaacatctcagtaactagaggaaaagaaatcaa-cgagattccctaagtagtggcgagcgaacggggaaaagggcaaaccgtc--caagagaacgctttagcagagttacctggaaaggtaagccatagaaagtgatagccttgtatgcgacaaggcgttaggtagcagtatccagagtaggccaggacacgagaaatccaggtt…
>non-CPR_non-CPR_Proteobacteria_NC_015318
--ctaagctactaagggcatgcggtggatgccttggcgatggcaggcgatgaaggacgtggtaggctgcgataagcctcggggagctgccaaacagctttg-atccggggatttccgaatggggcaacccggtgaggtaaactcaccgtccacct---------------tgtggacgctaacccggtgaactgaaacatctcagtagccggaggaaaagaaatcaaccgagattccgcgagtagcggcgagcga
>non-CPR_non-CPR_Proteobacteria_NZ_CP007051
gtttaagctacttacggcatacggtggatgccttggcaattgagagcgatgaaggacgtagcaggctgcgataagcctcggggagctgccaagcagctttg-atccgaggatctccgaatggggcaacccggtagagcaaacctacc-attctgtacctgat---cagg-taggaaggcaaacctggtgaactgaaacatcttagtaaccagaggaaaagaaatcaaacgagattccgaaagtagcggcgagcgaaatcggaaaagcccaaacctgg-ggttagtttgttcttagctgaaaacgctggaaagcgttgccatagaaggtgatagccctgtaagcgaaaagaacccctatccttttttcttgagtagctcgaggcacgtggaaccttgagt…
>non-CPR_non-CPR_Proteobacteria_NZ_CP010311
ggtcaagctactaagggcgtacggtggatgccttggcatcgggaggcgatgaaggacgcggtaagctgcgataagcttcggggagccgctaaacagctttg-atccgggggtgtccgaatggggaaacccggcagggattatcctgtcatcatgcactgaatccataggtgtatgaggcgaacgaggggaactgaaacatctaagtaccctcaggagaagaaatcaattgagattccgtcagtagcggcgagcgaacgcggaagagcccaaaccatg-ggattgacaatgggtagcagaaggctctggaaagtgccgccatagtgggtgaaagccccgtatgcgaaaccttgcaccctagggtgtccccgagtaccacggaacacgagaaattccgtgg…
>non-CPR_non-CPR_Proteobacteria_NC_020304
gaataagctattaagagctaacggcggatgccttggcatcggaaggcgatgaaggacgtggaaagctgcgataagcttcggggagttg-ttaacagctttg-atccggagatttccgaatggggaaacccagcaggagttatcctgttatccttgactgaatacataggtcatggaggcgaacgtagggaactgaaacatctaagtacctgcaggaatagaaatcaattgagattctgtgagtagcggcgagcgaaagcggaaaagcccaaaccatg-ggattagtgatgattagtggaaaggtatggaaaggcctaccatagacggtgatagtccggtatacgaaaatctgtaccctagggagttcctgagtaccacgagacacgtgaaaccttgtgg…
>non-CPR_non-CPR_Proteobacteria_NZ_CP012159
ggtcaagctacgaagggcgcacggtggatgcctaggcgatcagaggcgaagaaggacgtggacagctgcgaaaagctccggggagccg-ctaacagctttg-atccggagatctccgaatggggcaacccgagcaggg-act-ctgccatctgagagtgaatacatagc-tcgggaagccaagccagggaactgaaacatctaagtacctggacgaaaagaaagcaaaagcgactccctcagtagcggcgagcgaagggggaagagcctaaaccatc-aaaaaaggcgaggttagtcgaacggtctggaaaggccggccatagcaggtgacagccctgtagacgaaaactga--ggtgtcgagacacccgagtaccgcaggacacgagcaatccggcgg…
>non-CPR_non-CPR_Proteobacteria_NZ_CP011509
aagtaagctactaagggcgtgcggtggatgcctaggtgccaagaggcgaagaaggacgtgggtggctgcgaaaagctccggggagttgccaaccgacgttg-agccggagatgtccgaatggggaaacccagcgtggagaaacgcgttacctcggcctgaatacatagg-cgaaggagcgaaccaggggaagtgaaacatctcagtaccctgaggaaaagaaaacaatagtgattcccggagtagtggcgagcgaaacgggaacagcctaaacca---ggacctttgccggttagcggaagcacctggaaaggtgcaccaaagagagtgacagtctcgtacgcgaaaactgg-gccgagcggggtacccaagtagggcgggacacgtgcaatcctgcct…
>non-CPR_non-CPR_Proteobacteria_NC_008011
agacaagataataagggaacaaggtggatgccttggcgctgagaggcgaagaaagacgtggtaagctgcgataagcatcggggaggcgctaaacacctatg-atccggtgatgtctgaatggggaaacccactgggagtaatcccagtatcattgactgaatacataggtcaatgaagctaacccagggaagtgaaacatctcagtacctggaggaaaggaaatcaaaagagactcccgtagtagtggcgagcgaaccgggaagagcctaaaccacg--tgattgagtaagcaggagaagagaactggaaagttccgccatagagagtgatagcctcgtatctgaacctgaa-gacatagtcggtacctgagtactgcgaggcacgtgtaaccttgtgg…
>non-CPR_non-CPR_Proteobacteria_NC_016620
----aagctactaagggcatatggtggatatcttggcagcaagaggcgatgaaggacgtactaggtaacgatatgctaagacgagtgatcaagtagctttg-actcttagatttccgaatggggtaaccccgctagcagaaactagtgactatacagtgagtaaatagc-tattagagcgaacgcagggaactgaaacatctaagtacctgtaggaacataaatcaatagagattctgctagtagcggcgagcga
>non-CPR_non-CPR_Proteobacteria_NC_012115
gagaaagctactaagggcgagcggtggatgcctaggctggaagaggcgaagaaggacgtgctaggctgcgaaaagccagggggagttg-ccaagagcgttg-atccctggatgtccgaatgggggaacccggccggtggagaccggtcactcct----------------atggagggcgaacccggggaagtgaaacatctcagtacccggaggaaaagaaatcaaccgagattccgagagtagcggcgagcgaaatcggagtagcccgtctct---------ctgtatgttagaggaattacctggaaaggtaagccacagaaggtgaaagccctgtactcgaaaacatataagcagagaccttagcgagtagctcgggacacgtgttatcctgagt…
>non-CPR_non-CPR_Proteobacteria_NC_008576
----aagtaacgaagggcatacggtggatgccttggtgccaagaggcgatgaaggacgtagcacgttgcgataagcttcggagagccg-cgagcagctttg-acccggagatttccgaatggggaaacccggcgggatgaa-cccgtcactactagctgaataaataggctattagagcgaacgcggggaactgaaacatctaagtacccgtaggaacagaaatcaattgagattccctaagtagcggcgagcga
>non-CPR_non-CPR_Proteobacteria_NC_005363
ttttaagctacaaagggcttacggtggatgccttggcactaagaagcgatgaaggacgtggtaagctgcgataagcttcggggagtgg-cacacaactttg-atccggagatttccgaatggggaaacccaccatt------tatggtatcactcaatgaatacatag--gtttgaagcgaacgaggggaagtgaaacatctcagtaccctcaggaagagaaatcaaccgagattcccccagtagtggcgagcgaacggggaacagcctaaaccttg--ggaccggagaagttagagtaacagtctggaaagtctggcaagatagggtgatagccccgtactcgaaaacttcggccctagcggcatcccgagtaccacgaaacacgtgaaatttcgtgg…
>non-CPR_non-CPR_Proteobacteria_NC_003317
gatcaagttcttaagggcatttggtggatgccttggcatgcacaggcgatgaaggacgtgatacgctgcgataagcgtcggggaggtg-cgaatacctttg-atccgacgatttccgaatggggcaacccaccttagatgat-aaggtatctaaccttgaatacataggggttagaagcgaacctggggaactgaaacatctaagtacccagaggaaaggacatcaaacgagactccgctagtagtggcgagcgaacgcggaccaggccagtg--tt------ttgtgaataaagtggaacgagttggaaaactcgaccgaagtgggtgatagtcccgtacacgtagaata------gcagaagtccttgagtagggcgggacacgtgaaatcctgtct…
>non-CPR_non-CPR_Proteobacteria_NZ_CP011805
attcaagctggtaagagcatttggtggatgccttggcatgtacaggcgatgaaggacgtggcacgctgcgataagcgtcggggagttg-tgagcaactttg-atccggcgatttccgaatggggaaacccaccctcaccatt-agggtatcccgaagtgaatatatagc-tggtgaagcgaacccggggaactgaaacatctcagtacccggaggaaaagacatcaacagagattcccgtagtagtggcgagcgaaccgggaccaggccagtgc-tt------catttcaactagcagaacactttggaaagagtggccatagcgggtgacagccccgtatgtgaaagtga-----tgatgaaggactcgagtagggcgggacacgtgaaatcctgtct…
>non-CPR_non-CPR_Proteobacteria_NC_023135
aatcaagccgagaagggcgtttggtggatgccttggcagtaagaggcgatgaaagacgtgataccctgcgataagcttgggggagccg-ggaatagctttg-atcccaagatctctgaatgggggaacccacctgaaag----caggtactatagactgaatacatagg-tataagagcaaacccggggaactgaaacatctaagtacccggaggaaaggacatcaatagagactccgttagtagcggcgagcgaacgcggaccagccgagcct------------atgagtgagaagaacatgctgggaagcatggccatagcgggtgacagccccgtattctaagctct------gagggacgtattaagtagggcgggacacgtgaaatcctgttc…
>non-CPR_non-CPR_Proteobacteria_NZ_CP015093
aatcaagccgagaagggcgtttggtggatgccttggcagtaagaggcgatgaaggacgtgatactctgcgataagccatgaggagctg-agaatagctttg-atccatggatttccgaatggggcaacccacctga---aa--caggtactttaacctgaatacatagg-tttaagagcaaacccggggaactgaaacatctaagtacccggaggaaaggacatcaatagagactcccctagtagcggcgagcgaacggggaccagccgaactc-------------agagtgactggaatggtctggaaaggccaaccacagcgggtgacagtcccgtacaggaagc------tcgatgagacgtatcaagtagggcgggacacgtgaaatcctgtct…
>non-CPR_non-CPR_Proteobacteria_NC_006142
agtaaatgtaataagagcatttggtggatgccttggcactagaaggcgatgaaggacgtaatacgctgcgataagcttcggggagttg-cgaataactttg-atccgaagatttccgaatggggaaacccacctaattt----taggtattatatagtaaatacatag--atatgaggcgaacccagcgaactgaaatatctaagtagctggaggaaaggacatcaaccgagactccgttagtagtgacgagcgaacgcggaccaggccagtg--tt------caaaaaaataactaaaacaatatggaaagattgaccatagagggtgatagtcccgtataggtaaaaagt---------aagtccttgagtaaggcgggacacgtgaaatcctgttt…
>non-CPR_non-CPR_Proteobacteria_NZ_CP007481
----aaaaaactaagagtgtctgatggatgccttggtgccaagaggcgaagaaggacgtgttaggctgcgataagccgcgggtagttg-ccagaaacgttt-atccgtggatctccgaatggggaaacccgactagctatg-ctagtcattgcatgctgaatacatagg---gcaaagcgaacccagcgaactgaaatatctaagtagctggaggaaaagaaatcaaccgagattccgctagtagtgacgagcga
>non-CPR_non-CPR_Proteobacteria_NC_000913
ggttaagcgactaagcgtacacggtggatgccctggcagtcagaggcgatgaaggacgtgctaatctgcgataagcgtcggtaaggtgatatgaaccgttataaccggcgatttccgaatggggaaacccagtgtgtttcgacacactatcattaactgaatccataggttaatgaggcgaaccgggggaactgaaacatctaagtaccccgaggaaaagaaatcaaccgagattcccccagtagcggcgagcgaacggggagcagcccagagcctgaatcagtgtgtgtgttagtggaagcgtctggaaaggcgcgcgatacagggtgacagccccgtacacaaaaatgcacatgctgtgagctcgatgagtagggcgggacacgtggtatcctgtct…
>non-CPR_non-CPR_Proteobacteria_NC_009655
agttaagcgactaagcgtacagggcggatgccttggcaatcagaggcgaagaaggacgtgctaatctgcgaaaagctcggatgagccgataagaggcgttt-aatccgagatgtccgaatggggaaacccgatggatgaaga-ccatcatttcattatgaatccatagtaatgaaaggcgaaccgggagaactgaaacatctaagtaccccgaggaaaagaaatcaaccgagattccgtgagtagcggcgagcgaaagcggagcagccggtca----tgatagcggcatagacagaggaattggctgggaagccaagcgacagagggtgacagccccgtactcgaagtctgaggtactgagctgacgagaagtagggcgggacacgaggaatcctgtct…
>non-CPR_non-CPR_Proteobacteria_NC_015662
ggttaagcaaataagcgtatttggtggatgccttggtaatcagaggcgatgaaggacgtgctaatctgcgataagcatcggtaagttgattatgaacattt-atccgatgatttccgaatggggaaacccggcgttattga--acgtcattattaattgaatacatagattaataaagcaaaccgagagaactgaaacatctaattatctcgaggaaaagaaatcaattgagattcccttagtagtggcgagcgaaaggggaatagcctagaatt-ttaatattaaagtttataatagaatgatttggaaaaatcaacaatataaggtgacagtcctgtatatgaaatatacttttaatataattcaataagtagggcgggacacgagaaatcctgtct…
>non-CPR_non-CPR_Proteobacteria_NC_017857
ggtcaagtgaataagcgcacatggtggatgccttggcgataagaggcgatgaaggacgtagtaatctgcgaaaagcgtaggggagctgataaacggctttg-agcctgcgatctccgaatggggcaacccacatacccttgggtatgtatcattaagtgaatacatagcttaatgaagcgaacccggcgaactgaaacatctaagtagccggaggaaaagaaatcaaccgagatttccctagtagcggcgagcgaacgggaaacagcctgcaa----taatatttaacgttttagtggaacgagctggaaagcttggcgatacagggtgatagccccgtacacgaaaaggcgggtactaagcttgcgacaagtagggcggggcacgagaaaccttgtct…
>non-CPR_non-CPR_Proteobacteria_NZ_CP014234
agtcaagtaatgaagtgcacatggtggatgccttggcagtcagaggcgatgaaagacgtgacagcctgcgaaaagcgtcggggaggcg-gcaatacctgtg-atccggcgatatctgaatggggaaacccacttgtcataag-aggt-accc--cgctatatttatag----ggggggcaaaccgggagaagtgaaacatctcagtaacccgaggaaaagacatcaatagagattcccctagtagcggcgagcgaacggggaggagccgactg------------tataatttagaggaatgacttggaaaggtcaatcgtagagggtgataatcccgtactcgaaaggtta----taagaagcatattaagtagggcggaacacgagaaattctgtct…
>non-CPR_non-CPR_Proteobacteria_NZ_CP019046
ggtcaagtgactaagcgcatacggtggatgccttggcagtcagaggcgatgaaggacgtagtagcctgcgaaatgcttcggggagtcggcaaacaactttg-atccggagatgtccgaatggggaaacccacctggtgtaagccaggtacctttaactgaatacataggttaaaggggcgaacgaggggaactgaaacatctaagtacccttaggaacagaaatcaattgagattcccccagtagcggcgagcgaccggggatcagcctgcaa----taatagctttagtgttagtggaacggtctggaaagtccggcgatagagggtgatagccccgtacacgaaaacactggtactgagcttgcgacaagtaggtcgggacacgtgatatcttgact…
>non-CPR_non-CPR_Proteobacteria_NZ_AP012978
ggtcaagtgactaagcgcatacggtggatgccttggcggtagaaggcgatgaaggacgttgtagcctgcgataagcctcggggagctggcaaacagctttg-atccggggatttccgaatggggaaacccacccttcggggtcctgt---------------ccgttcgggcaggaggcgaacccagggaactgaaacatctaagtacctggaggaaaagaaatcaaccgagattccctaagtagcggcgagcgaaaggggactagcctatct----------cgcagtgagtagtggaacggtctggaaagtccggcgatacagggtgatagccccgtacacgaaacgat----ctgcaggagatatcaagtagggcgggacacgtgttatcctgtct…
>non-CPR_non-CPR_Proteobacteria_NC_016112
ggtcaagtgaataagcgcatacggtggatgcctaggcgataagaggcgacgaaggacgtagtagcatgcgataagccgcggggagtttgcaaactactttg-atccgcggatttccgaatggggcaacccagtcaggacaacctgattatccttaagtgaatacatagcttaaggaggcgaacccggggaactgaaacatctaagtacccggaggaaaagaaatcaaccgagattcccttagtagcggcgagcgaacggggaccagcccttaa------gtccagccccagttagtggaatgccctggaaagagcagccatagatggtgatagcccagtacatgaaaactgg------tggatgaaaacgagtaggacggggcacgtgaaaccttgtct…
>non-CPR_non-CPR_Proteobacteria_NZ_CP004006
ggtcaagaagagaagcgcaaacggtggatgccttggcagtaagaggcgaagaaggacgtggaatcctgcgaaaagctttggggagctg-gaaacggcgttg-atccgaagatgtccgaatgggggaacccggcttgacgagatgagtcacttatgactgaatacataggttatgagagcgaacttggggaactgaaacatctaagtacctaaaggaaaagaaatcaaacgagattctcttagtagcggcgagcgaagggggaagagcctggtgt-----atatgatgctatgaagtggaacgacttgggaaagttgaccgtagggggtgatagtcccgtacacgtaggtagcgaactaagcacacgagcaagtaggccgggacacgtgaaatcctggtt…
>non-CPR_non-CPR_Proteobacteria_NZ_CP007541
agtcaagtgaataagcgcatatggtggatgccttggcagtaagaggcgatgaaggacgtggtaacctgcgataagcttcggggagctggtaaatagcaatg-atccggaggtttccgaatgggggaactcactccgtgtaggcggagtattgtatgttgaattcatagacatataaggcaaacctggagaactgaaacatctaagtatccagaggaaaagaaatcaattgagattccgttagtagtggcgagcgaaagcggagtagcccggtc--taaatcaatgttaactttagcagaatattttggaaaatttagccatagtaggtgatagccctgtatgcgaaaaggtt--agtgtgggtgacgaagagtaagtcgagacacgtgttatcttgact…
>non-CPR_non-CPR_Proteobacteria_NZ_CP011126
agtcaagtgaataagcgcgtatggtggatgccttggcagtaagaggcgatgaaggacgtagtagcctgcaataagcttcgggaagctggcaaacagcaatg-atccggagatttccgaatggggaaacccaaccttt--aa-aaggttattatgtactgaattcataggcacataaggcgaacctggggaactgaaacatctaagtacccagaggaaaagaaatcaaccgagattccgtcagtagtggcgagcgaaagcggaacagcccagtt--taaatcattattggctttagcagaatgttctggaaagttcagctatagtgggtgatagccccgtatgtaaaagggct--aatgtgggtaacgatgagtaggtcgggacacgtgaaatcttgact…
>non-CPR_non-CPR_Proteobacteria_NC_002971
ggtcaagtgaataagcgcatatggtggatgccttggcagtaagaggcgatgaaggacgtagtagcctgcgataagcttcggggagctggcaaacagcgatg-atccggagatttccgaatggggaaacccaacctttcg----aggttatcgtatactgaattcataggtatacgaggcgaacctggggaactgaaacatctaagtacccagaggaaaagaaatcaaccgagattccgtcagtagcggcgagcgaaagcggaacagcccagtt--taaatcattatttgttctagcagaatgttctggaaagttcagccatagcgggtgatagccccgtacgcgaaagagta--aatgtgggtaacgatgagtaggtcgggacacgtggtatcttgact…
>non-CPR_non-CPR_Proteobacteria_NC_009446
gatcaagtgaataagtgcatacggtggatgccttggcgacaacaggcgaagaaggacgtggaaatctgcgaaaagcttggatgagctg-ataacagcgatt-aatccaagatctccgaatggggcaacccgacctaa------gggtcatctttaattgaatcaatagattaaagaagcgaaccgggagaactgaaacatctcagtaccccgaggaaaagaaatcaaccgagattctgcaagtagcggcgagcgaacgcggagaagccatgaa--t-------taatagagccagtagaactcgttgggaaacgagaccgaagagggtgaaagtcccgtatacgaaagcgaa----------gatgaaatagtagggcgggacacgagaaatcctgtct…
>non-CPR_non-CPR_Proteobacteria_NC_016043
gatcaagtgactaagtgcacatggtggatgccttggcgatcacaggcgaagaaggacgtaatagcttgcgaaaagctgcggggagttggcaaatggcattg-atccgcagatatccgaatggggaaacccacctctttttag-gaggtatccttatctgaatacatagggtgaggaggcgaaccgagtgaactgaaacatctaagtaactcgaggagaagaaatcaaccgagattctgaaagtagtggcgaacgaaattggatgagccgcaac---gagatagtaattgtagtagtcgaacttactgggaagtgagaccgtagagggtgatagtcctgtagacgaaactata-tactaggcgttgcaacaagtagggcgggacacgtgtaatcctgttc…
>non-CPR_non-CPR_Proteobacteria_NC_012968
gatcaagcgaataagtgcatatggtggatgccttggcgattacaggcgatgaaggacgtgatagcctgcgtaaaggttcggggagctggcaaatagctttg-atccggacatgtccgaatggggaaacccacccgcaaggg------taaccgctcctgaatatatagggagaggtggcaaaccgagtgaactgaaacatctaagtagctcgaggaaaagaaatcaaccgagattccgtaagtagtggcgagcgaacatggaatagcctgtta---tttttagcacatgcgatagtagaacggaatggaaagtccggccatagagggtgatagccccttatacgaaatcccg--aactagggtaacgacaagtagggcggggcacgagaaaccttgtct…

## Sheet: 5S rRNA
>CPR_others_Dojkabacteria_GCA_000989505.1
--tctggtgattgtagcgatatggtcccacccgttcccatcccgaacacggaagtgaaacgtatcagcgccgacgatacttacctggagagggttgggaaaataggtcatcaccagtt--
>CPR_others_Dojkabacteria_GCA_000991805.1
--cctggcgattgtagcagagtggaactacctgactccatcccgaactcagaagtaaaacgctctagcgccgaaaatacttagacctttggtcttgggaagataggtcattgccagga--
>CPR_others_CPR3_GCA_000990575.1
--cctggtagttagagcaagggggttctacctctttccattccgaacagagtcgtaaaaacctttagcaggaaagatacttggttcacaagacctgggaaaatacctcgctgccagga--
>CPR_others_CPR1_GCA_000998265.1
--tttggtg-actcaacgcagtggaaacacctctttccattccgaacagagaagtgaaacgctgtagtgccgatgataccgcttc-----attgcgggaaagtaggtagtcgccaaat--
>CPR_others_CPR1_GCA_000998265.1_2
--tttggtgataatatcacagtggcaacacctcttcccattccgaacagagtcgtgaaacgctgtggtgccgatggtagtggacgtctcccggccgcaagagtaggtatcgccaaaa---
>CPR_WWE3_WWE3_GCA_001772655.1
--tctggtgatttgagcgagggtgaaccacctcttaccattccgaacagagtcgtgaaagccctcagcgctgatggtactgtattctcaagatacgggagagtaggtcattgccaggc--
>CPR_WWE3_WWE3_GCA_001443395.1
--tctggtgatttgagcggaggtgaactacccgatcccattccgaactcggtcgtaaaagcctctagcgctgatggtacttggcctt---ggtctgggagagcaggtcatcgccggaa--
>CPR_WWE3_WWE3_GCA_001772715.1
--ctcggtcttttgagcgccttggaaccacctcttcccattccgaacagagaagtgaaacagggcagcgctgatgatattgtgggggcaatccatgagaaagcaggtcaaggccggga--
>CPR_WWE3_WWE3_GCA_001873785.1
--gctggtgattttagcggtaggaaaacacctctttccattccgaacagagcagttaagactaccagcggcgaagatactctccaactgaggggtgggaaaatagttcattgccagta--
>CPR_WWE3_WWE3_GCA_001772615.1
--cctggtgatgatagcggtggggccacacctcttcccattccgaacagagaagttaagcccacaagcgccgaaggtagtgcgggggcaatccgtgtgagaataggtcgtcgccggga--
>CPR_WWE3_WWE3_GCA_001772575.1
--ctcggtggtgattgcgatggggctctacctcttcccattccgaacagagaagtaaaactcatcagcgccgaaaatactagt-------taactgggaagataggtcgccgccggga--
>CPR_WWE3_WWE3_GCA_000503835.1
--cctggtgatgattgcggtagggtaacacctcttcccattccgaacagagaagttaagactaccagcgccgaaaatactgaacag----agtttgggaagataggtcgtcgccgggg--
>CPR_MG_Woykebacteria_GCA_001816835.1
--cttggcgattggagcggattggcaccacctcttcccattccgaacagagtcgtgaaacgatccagcgctgatgatactacctgattattgggtgggaaagtaagtcgtcgccagga--
>CPR_MG_Woykebacteria_GCA_001816655.1
--taaggctgttagagcggagcggctccaccccttaccatcccgaacagggtcgtgaaacgttccagcggagacgatacttaagccacaagcttcgggaaaatatctcacagctgtaa--
>CPR_MG_Woykebacteria_GCA_001816715.1
--caaggccgttggagcgccagggctctacctcttcccataccgaacagagtcgtaaaaactggcagcgccgatgatacttggtccgcagggcctgggaaagtaggtcacggccgtat--
>CPR_MG_Curtissbacteria_GCA_001775055.1
--gctggtgtctgtagcgatatggaaccactccttcccatttcgaacaggatagtgaaacgtatcagcggcgacaatagtgcctgggcaatgggtgcgaagatagctcgatgccagca--
>CPR_MG_Curtissbacteria_GCA_001774865.1
--tccggtcttttgagcgatatggaaccactccttcccattccgaacaggttagtgaaacatatcagcgccgacgatagttgtggggcaactaccgcgaaaataggtcaaggccggga--
>CPR_MG_Curtissbacteria_GCA_000995995.1
--cgtggtgatttgagcgaggtggtaccactccatcccattccgaactggatagtgaaacgccttagcgctgacgatagttgttgggtaacttccgcgaaaataggtcatcgccacat--
>CPR_MG_Curtissbacteria_GCA_001776475.1
--tccggtggctagagcgaggtggaaccactcttaaccattccgaacaagatagtgaaacgcctcagcgccaacgatagttgtaccgcaagtgccgcgaaaataggtcgtcgccggac--
>CPR_MG_Curtissbacteria_GCA_001775025.1
--cttggtgattttagcgatctggatccactccatcccattccgaactggatagtgaaacggatcagcgccgacaatagtgcgatg-tgagttgcgcgaagataggtcatcgccaggg--
>CPR_MG_Curtissbacteria_GCA_001776375.1
--gctggtgtctctagcagtgtggaaccacccagggccattccgaactggatagtgaaacgcactagcggcgacaatagtatatgggcaatgtatgcgaaaatagttcgatgccagca--
>CPR_MG_Daviesbacteria_GCA_001777495.1
--tccggtggtttgagcgcaagcgtactacctcttcccatcccgaacagagtcgtaaaagcttgtagcggggacgataatgaagccgaaagctttgtgaaaatacctcactgccggat--
>CPR_MG_Daviesbacteria_GCA_001776835.1
--tgcggtgatttgagcggtgtggaaccaccctttcccattccgaacagggaagtgaaacatgccagcgcagacgatactagggtcgaaagccccgggacaatatgtcattgccgtac--
>CPR_MG_Daviesbacteria_GCA_001777015.1
--ctcggtggtttgagcgaagtggtccgacctgatcccatcccgaactcagtcgtcaaacacttcagcggggacgataatgcatccgcaagttgtgtgaaaatacctcactgccggac--
>CPR_MG_Levybacteria_GCA_001782675.1
--ttcggtgattagagcgcggtggaactacccttaaccattccgaacaaggaagtaaaacgccgtagcgctcacgatactgggggag---accctgggacaataggtcatcgccgggg--
>CPR_MG_Levybacteria_GCA_001783815.1
--cttggtctttggagcgatgtagaaccacctgatccctttccgaactcagaagtgaaatgcatcagcgcccacgatactgga----cagagtctgggacaataagtcaaggccagga--
>CPR_MG_Levybacteria_GCA_001782355.1
--gctggtcctttgagcgagttggaactacctgatccctttccgaactcagaagtaaaacggctcagcgcctacgatactccgagtctgactcgggggacaatgggtcagggccagca--
>CPR_MG_Levybacteria_GCA_001782075.1
--tccggtggtttgagcgagctggtactacctgataccattccgaactcagaagtaaaacggttcagcgcctacgatactgggattt---atcctgggacaataggtcactgccgggc--
>CPR_MG_Levybacteria_GCA_001781995.1
--tctggtaattagagcgaagtggaaacacctcttcccattccgaacagagaagtgaaacgcttcagcgcctacgatactgggatt-----tcccgggacaataggtcattgccagaa--
>CPR_MG_Levybacteria_GCA_001783725.1
--cccggtggtaatggcggaggggtcacacctgttcccatcccgaacacagtagttaagccctccagcgccgatggtactgca---gttttctgtgggagagtaggacactgccggga--
>CPR_MG_Levybacteria_GCA_001784125.1
--ttcggtctttagagcggtctggaactacctttttccattccgaacaaagtcgtaaaacggaccagcgttgacgatactaggactc---ttcctgggacaatagatcaaggccgagg--
>CPR_MG_Roizmanbacteria_GCA_016700135.1
--tctggttacttgagcgacctggaaccaactcttcccatcccgaacagagtcttgaaacgggttagcgccgatgatactcgctacaaatggacggggaaagtaggtcgtagccagtt--
>CPR_MG_Roizmanbacteria_GCA_001789885.1
--cccggtgattcaagcgctgtcgtaccactccttcccattccgaacaggatagtgaaaggcagcagcggggacgatactcatctcgcaaggattgggacaatacctcatcgccggga--
>CPR_MG_Roizmanbacteria_GCA_001790075.1
--tctggttatttgtgcgaactggaaccacctcttcccattccgaacagagtcgtgaaaggttagagcgccaacgatactacgggttaaccccaatggaaaataggtcatagccaggg--
>CPR_MG_Roizmanbacteria_GCA_001789935.1
--cttggtgatttaagcgttttggaaccacctcttctcattccgaacagagtcgtgaaacaaaatagcgccgacgatactatcgcccaacgtgatgggaaactaggtcattgccaggg--
>CPR_MG_Roizmanbacteria_GCA_001789365.1
--tctggtgatttgagcgttttggaaccacctcttctcattccgaacagagtcgtgaaacgaaacagcgctgacgatactctt-------attgggggacaataagtcgttgccaggg--
>CPR_MG_Roizmanbacteria_GCA_001788095.1
--cttggtgattggagcggtctggaaacacctcttcccattccgaacagagccgtgaaacgggccagcgccgacgatactgcc-------tttgtgggacaataggtcatcgccaagg--
>CPR_MG_Roizmanbacteria_GCA_001788235.1
--tttggttatttgagcgactgggaaccacccttccccattccgaacaaggacgtgaaaccggtcagcgccgacgatactca---------tcaggggacaataggtcatagccaggg--
>CPR_MG_Roizmanbacteria_GCA_001789805.1
--cttggttacttgagcggttcggaaccaccctttcccatcccgaacaaggtcgtgaaacgaaccagcgccgacgatactcactccaaatgaatggggaaactaggtcgtagccgaga--
>CPR_MG_Roizmanbacteria_GCA_001788035.1
--tctggttactggagcgacttggtaccaccctttctcatcccgaacaaggaagtgaaacgagtcagcgccaatgatacttgtcagctagtgactgggaaagtaggtcgtagccaggg--
>CPR_MG_Roizmanbacteria_GCA_001787935.1
-tctcggtgatttagccgcgtaggccccacctcttcccattccgaacagagaagtgaaaatacgcggcctcgatgatact----------ctaaagggaaagtagagttcgccgggaa--
>CPR_MG_Gottesmanbacteria_GCA_001779145.1
--ctcggtgaccaaagcggagtggaactactcttttccatttcgaacaggaccgtaaaacgctccagcggggacaatacttgttgggcaatgaccgggaaaatacctcgttgccgggg--
>CPR_MG_Gottesmanbacteria_GCA_001779195.1
--ttcggtctctagtgcgaactggtcctaccttttcccatttcgaacagagtcgtaaaacggttcagcgcctacgatagtagtctggcaagacttgcgaaaataggtcgaggccggaa--
>CPR_MG_Gottesmanbacteria_GCA_001779275.1
--ttcggtctttggagcggagtggaactaccttttcccattccgaacagagaagtaaaacactccagcgccgacgatagtaattccgcaagaactgcgaaaataggccaaggccgaag--
>CPR_MG_Gottesmanbacteria_GCA_001781025.1
--ctcggtgatctgagcgagatggaacgacctgatcccattccgaactcagaagtcaaacgtcttagcgtcgacaatacctgagtcgcaagctccgggaagataggtcattgccgagg--
>CPR_MG_Gottesmanbacteria_GCA_001779035.1
--tccagtcttttgagcgacgtggcaccacccgatcccattccgaactcggaagtgaaacgcgtcagcgctgacaatacctgattcgcaaattccgggaagataggtcaaggctgggg--
>CPR_MG_Shapirobacteria_GCA_001790895.1
--tccggtcattagagcgaaatgggcccacctcttcccattccgaacagagccgtgaaacttttcagcgccgacaataggctttccgcaagaattctgaaaataggccatggccggaa--
>CPR_MG_Shapirobacteria_GCA_000989305.1
--ctcggtcatcagagcgaggtggctccaccttttcccattccgaacagagaagtgaaacgcctcagcgccgacaatagtctccctgcaagggtcctgaagataggtcgtggccggga--
>CPR_MG_Amesbacteria_GCA_000402715.1
--ctcggtcattaatgcggtgtggtcccacctcttcccattccgaacagagccgtgaaacgcgccagcgccgataatagccatccttctcgggttgtgaaggtaggtcatggccgggg--
>CPR_MG_Amesbacteria_GCA_001775605.1
--ctcggtttctggagcggcgtggtactaccctattccattccgaactaggccgtaaaacgcgccagcgctgaaaatagctagggggcgatcctcgtgaagataggtcgaagccgaga--
>CPR_MG_Amesbacteria_GCA_001002325.1
--ctcggtcatctgagcggcgtggaactacttcttcccattccgaacagaaccgtaaaacgcgccagcgccgacaatagctgaggggcaacttccgtgaagataggtcatggccgaga--
>CPR_MG_Woesebacteria_GCA_001029755.1
--cttggtgacttgagcgcggtggaaccacctgattccattccgaactcagaagttaaacgccgtagcgctgacgatagttaccgggcaatggtcgcgaaaataagtcgtcgccaaga--
>CPR_MG_Woesebacteria_GCA_013426185.1
--ttcggttttaagagctaggcggaaccacctgatcccattccgaattcagaagtgaaacgcctaagcgccgacgatagttgtccggcaaggaccgcgaaaataggccaaggccgaaa--
>CPR_MG_Woesebacteria_GCA_013374835.1
--accagtgattaaagcgccttggaactacctgaccccattccgaactcagaagtaaaactgggcagcgcctacgatagtgcttaggcaatttgtgcgaaaataggtcattgctggtc--
>CPR_MG_Woesebacteria_GCA_001793085.1
--ctcggtgattagagcgtcgtcgacctacctaatcccattccgaacttagaagtaaaaggcgacagcggggacgatagctttccggcaaggaacgtgaaaatacctcgttgccggga--
>CPR_MG_Woesebacteria_GCA_001792075.1
--ttcggtcttttgagcggtttggaaccacctgttcccattccgaacacagaagtgaaacagaccagcgccgaagatagttgtggggcaatcaccgcgaaaataggtcaaggccgggg--
>CPR_MG_Woesebacteria_GCA_000999115.1
--gtcagtgattctagcgctctggaactacctgattccattccgaactcagaagtaaaacggagcagcggggacgatagttgtccggcaaggaccgcgaaaatacttcattgctgatc--
>CPR_MG_Woesebacteria_GCA_001793235.1
--cttggtgatttgagcgctgtggtaccacctaattccattccgaacttagaagtgaaacgcagcagcgccgacgatagctacccggcaagggtcgtgaaaataggtcattgccatgc--
>CPR_MG_Woesebacteria_GCA_001793025.1
--cccggtgacgatagcgatccggacatacctggctccattccgaactcagaagttaaacggatcagcgggaacgatagtatgggggcaatccatgcgaaaataccacattgccgggg--
>CPR_MG_Woesebacteria_GCA_001792375.1
--cctggtgatcggagcggtctggtaccacctgaatccattccgaactcagaagtgaaacggatcagcggcgacgatagttgtggggcaatcaccgcgaaaatagctcatcgccagga--
>CPR_MG_Woesebacteria_GCA_001793105.1
--tctggtgatgatagcgaggtggaactacctcttcccattccgaacagagtcgtcaaacgcctctgcggcgacgatagtaagtgggcaatgcttgcgaaaatagcacgtcgccagtc--
>CPR_MG_Woesebacteria_GCA_001793015.1
--tccggtctcgatagcggagtggtacaacctgatcccattccgaactcagaagttaaacgctcctgcgccgacgatagtataccggcaaggtatgcgaacataggtcaaggccggaa--
>CPR_MG_Woesebacteria_GCA_001793695.1
--gctggtgcttagagcaaggtggaactactcctttccattccgaacaggatcgtaaaacgccttagcgcccacgatagtagtcgggcaatgactgcgaaaataggtcagtgccagca--
>CPR_MG_Woesebacteria_GCA_001792915.1
--tctggtcctttgtgcatcctggaactacctgataccattccgaactcagaagtcaaacgggatagcgcggacgatagtagccgggcaatggttgcgaaaatacgtcagggccaggc--
>CPR_MG_Woesebacteria_GCA_000994415.1
--tctggtgatttgagcggtgtggaactaccctttaccattccgaacagggccgtaaaacgcaccagcggtgacgatagccgtcgggcaatgactgtgaaaatagctcatcgccagat--
>CPR_MG_Woesebacteria_GCA_001001045.1
--tctggtgattagtgcaaagtggtcccacctgatccctttccgaactcagaagtgaaacactttagcggagacgatagtcctcgggcaatgagcgcgaaaatatctcatcgccagaa--
>CPR_MG_Blackburnbacteria_GCA_001816895.1
--ctcggtttttacagcgctgtcgacccacctcttcccattccgaacagagaagtgaaaggcagcagcgttgacgatagctgttgggcaatgaccgtgaaaatagaccaaggccgggc--
>CPR_MG_Blackburnbacteria_GCA_001816455.1
--ctcggtctttagagcgccttggacccacctgatcccatttcgaactcagaagtgaaacgaggcagcgcggacggtagtgtaggggcaatctatgtgagaatacgtcaaggccggga--
>CPR_MG_Beckwithbacteria_GCA_001303005.1
--cccggtctttggagcgatacggcaccacctcttcccatttcgaacagagaagtgaaacgtatcagcggggacgatactgcactggcaaggtgtgggacaatacctcaaggccgggt--
>CPR_MG_Beckwithbacteria_GCA_001776045.1
--cttggtgaccgaagcggggtggaactaccttttaccattccgaacagagtcgtcaaacaccccagcgccgacgatagtatattggcaaggtatgcgaaaataggtcgttgccaaga--
>CPR_MG_Collierbacteria_GCA_001003385.1
--ctcggtgatcggagcgacgtggtcccacctcttcccttcccgaacagagtcgtgaaacgcgtcagcgctgacgatagtatatgggcaatgtatgcgaaaataagtcatcgccgggg--
>CPR_MG_Collierbacteria_GCA_001002845.1
--tccggtgattggagcagggtggcaccacctcttcccattccgaacagagtcgtgaaacgcccgagcgccgacgatagttgttgagcaaccaccgcgaaaataggtcattgccgggg--
>CPR_MG_Collierbacteria_GCA_000404945.1
--tccggtgatcagagcgatttggaaccacctgatcccattccgaactcagaagtgaaacgagtcagcgtcgatgctagtacttccgcaagatgtgcgaaagtagatcatcgccgggc--
>CPR_MG_Chisholmbacteria_GCA_001816575.1
--cctggtgattggagcggcgtggccccacctctgcccattccgaacagagaagtgaaacgcgccagcgccgatgatagtgatccggaagggttcgcgaaagtaggtcattgccaggg--
>CPR_MG_Chisholmbacteria_GCA_001816955.1
--cccggtctttggagcgccgtcgaactacctcttcccatcccgaacagagtcgtaaaaggcggcagcggtgacgatagttccagcgcaactggagcgaaaatagctcaaggccggga--
>CPR_MG_Pacebacteria_GCA_001803465.1
--tcccgttgttggagcggggtggcactacctcttcccatcccgaacagagtcgtaaaacgccccagcggtgacgatagtattggcacaaccaatgcgaaaatagctcacagcgggaa--
>CPR_MG_Pacebacteria_GCA_001000345.1
--cccggtctttagagcggtgtggtcctacctcttcccattccgaacagagtcgtcaaacacaccagcgcccacaataatgctctcacaaggagtgtgaagataagtcaaggccggga--
>CPR_MG_Pacebacteria_GCA_001786485.1
--tctggtctttggagcggggtggaaccaactcttcccttcccgaacagagtcttgaaacgccccagcgctgacaatactgcacgggcaatgtgtgggacgataggtcaaggccagaa--
>CPR_others_Kazan_GCA_001029795.1
--ccccgtgatgataccggaggggttatacctcttcccatcccgaacagagcagtcaagccctccagggccgatgatagttggaccgcaagtcctgcaaaagtaggtcgtcgcgggta--
>CPR_others_Kazan_GCA_001001025.1
--cctggtgtccgaagcgagatggaaacacccgttcccatcccgaacacggcagttaagcatctcagcgccgatgatagttgccctttgtgggtcgcaaaagtaggtcgatgccagga--
>CPR_others_Kazan_GCA_001772255.1
--cttggtgactctagcgagagggaaacacctcttcccattccgaacagagaagttaagcctctcagcgctgatgatagttggacctcgcgtcctgcgaaagtaggtcgtcgccaaga--
>CPR_others_Berkelbacteria_GCA_000993135.1
--ggtggtgattctagcggtggggtcacacctcttaccatttcgaacagagtcgttaagtccaccagcgctgatgatacttgttccacaagaaccgggaaagtaagtcatcgccacca--
>CPR_others_Berkelbacteria_GCA_001774395.1
--gttggtgctttttgcggttggggtacacctcgttacattccgaaccgagcagttaagccagccagcgccgatggtacttacggcatcaccgccgggagagtaggccagcgccaaca--
>CPR_others_Berkelbacteria_GCA_001872655.1
--tctggtgactttggcgaaggggaaacacctgttcccattccgaacacagaagttaagcccttcagcgccgatggtacttgttccgcgagaaccgggagagtaggacattgccagtt--
>CPR_others_Berkelbacteria_GCA_001872695.1
--tctggtgattttagcgaacaggaaacacccgttcccattccgaacacggaagttaagctgttttgcgccaatgatagttacctcgcaagggttgcgaaagtaggtcatcgccagtt--
>CPR_others_Berkelbacteria_GCA_000991185.1
--gctggtgtttattgcaatgggggtacacctggttacatttcgaacccagcagttaagcccgttagcgccgatggtacttgtctcgcaaggactgggagagtaggacgacgccagcg--
>CPR_others_Berkelbacteria_GCA_001029735.1
--gttggtg-ctttaacgtggtgggtacacctcttcccattccgaacagagtagttaagcaccatagtaccgatgatacttgatccgaaagttccgggaaagtaggtaggcgccaaca--
>CPR_Sa_Saccharibacteria_GCA_003516025.1
--ttcggtgcccatagcaagagggaaacacctgttcccattccgaacacagcagttaagcctcctagcggttacaatacttggctttcgaagcctgggaaaatagcacggtgccgaat--
>CPR_Sa_Saccharibacteria_GCA_000803625.1
--ttcggtgcccatggcgaggaggaaacacctgttctcattccgaacacagaagttaagctccccagcggcgattatactgcg-------aaagtgggaaactagcacggtgccgaat--
>CPR_Sa_Saccharibacteria_GCA_001790575.1
--gctggtgttcatagcgtgggggaaacacctgttcccatcccgaacacagaagttaagccccatagtggtaacaatacttaggttt---gccttgggaaaatagcaaaacgccagca--
>CPR_others_CPR2_GCA_001872935.1
--tccggtgctttaagcgatggggaaacacccgaccccataccgaactcggaagttaagcccattagagccgatggtacttggatcggaagtcctgggagagtaggccagtgccggga--
>CPR_others_CPR2_GCA_000995395.1
--tctggtgattatagcgtagaggtcacacccgatcccatcccgaactcggaagttaagctctacagcgccgatggtacttggggttc--cccccgggagagtagggcgtcgccagaa--
>CPR_others_Abawacabacteria_GCA_001773455.1
--cctggtgattatgccaaagaggtcacacctgatcccattccgaactcagaagttaagcttttttgggctgatggtactgctggctttgcctgtgggagagtaagtagtcgccggga--
>CPR_Pe_Peregrinibacteria_GCA_001872565.1
--attggccacttttgcggtgggggtacacctgttcccattccgaacacagcagttaagcccacctacgccgatgatactagttccgctggagctgggaaagtagggcgtggccaata--
>CPR_Pe_Peregrinibacteria_GCA_001873565.1
--cttggtggctattgaggttggggtacacctgttcccatcccgaacacagaagttaagtcaaccttcgccgatggtactggtcttt---gggccgggagagtagggcgtcgccaaga--
>CPR_Pe_Peregrinibacteria_GCA_016699145.1
--ccaggcaattttagagagaaggtcacacctgttcccattccgaacacagcagttaagcttctcatcgccgatagtactgcaacct---gttgtgggagtgtaggacgttgcctgga--
>CPR_Pe_Peregrinibacteria_GCA_000993595.1
--gctggtaattttagagagtgggctacacctgttcccatttcgaacacagaagttaagccattcttcgccgatgatactctgagcagagctcgcgggaaagtaggacgttgccagca--
>CPR_Pe_Peregrinibacteria_GCA_001787455.1
--cttggcaattttagagacgggggtacacctgttcccatcccgaacacagcagttaagctcgtcttcgccgatgttactatggttt---tccatgggaaagtaggacgttgccaaga--
>CPR_Pe_Peregrinibacteria_GCA_001788715.1
--tcaggtatctatagagagggggatacacccgttcccattccgaacacggaagttaagctcctcttcgccgatcgtactgccttatgtaagggtgggagagtagggcgatacctgaa--
>CPR_Pe_Peregrinibacteria_GCA_001788965.1
--cttggtgcctatagccccggggaaacacccgttcccattccgaacacggcagttaagcccgggcgcgtcgatggtagtatggcga---gccatgcgagagtagatcggtgccaaga--
>CPR_Pe_Peregrinibacteria_GCA_001788955.1
--cttggtggttttagcgaagggggtacacccgttcccattccgaacacggaagttaagcccttcagcgccgatggtagttgggcatc--gccctgcgagagtaggtcgccgccaaga--
>CPR_Pe_Peregrinibacteria_GCA_001789045.1
--cctggtgtcctgagcgacggggacacacctgatcccattccgaactcagcagttaagcccgtcagcgtcgatggtagtgagggtctaaccctcgcaagagtagaccgatgccagga--
>CPR_Pe_Peregrinibacteria_GCA_001872575.1
--cctggtgcctctagcgacggggtcacacctgtttccatctcgaacacagcagttaagcccgccagcgccgatggtagtaatcctc---tggttgcaagagtaggccggtgccagga--
>CPR_others_Gracilibacteria_GCA_004563595.2
--cttggtagttataacggttgaggtacacctgttcccatcccgaacacagaagttaagccaactcgtgctgatggtagtgcatctcgtagatgtgtgagagtaagtagctgccaaga--
>CPR_others_Absconditabacteria_GCA_001007975.1
--ggtgattttgatgatgtagaggtcacacctgttcccattccgaacacagtcgttaagctctatgtggttgatgatactggtcctatcggggctgggaaagtagattaaagtcacca--
>CPR_others_Absconditabacteria_GCA_000503875.1
--ggtggtgctgacgggcttggggaaatacctgttcccattccgaacacagaagttaagtccaaaccggtcgatgatacttgcactgttagtgctgggaaagtagattagtgccacca--
>CPR_others_Andersenbacteria_GCA_001817035.1
--cgcggtgtctcaagcgagagggaaacacctgttcccattccgaacacagaagttaagcctctcagcgccgatggtagttagaattaatctttagcaagagtaggccgatgccgcgt--
>CPR_others_Doudnabacteria_GCA_001777585.1
--cctggtgccttttgcggctaggtcccacctgatcccatcccgaactcagaagtgaaactggccagcgccgatgatactgcggtgca--ccgcggggaaagtaggtcggtgccaggt--
>CPR_others_Doudnabacteria_GCA_001779845.1
--tagggtgacatttgcgacgttgtaccaccctgttccattccgaaccaggccgtgaaagacgtcagcgccgatgatactctagctgatgctagcgggaaagtaggccgttgccccct--
>CPR_others_Doudnabacteria_GCA_001777575.1
--ctccgtgcttcaaggcttgcggacccacctgatcccatcccgaactcagaagtgaaacgcaagaccgccgatgatactactgtgcacacagtggggaaagtaggcagtgcggggt---
>CPR_others_Doudnabacteria_GCA_001780035.1
--ccgcgtgtttcaagggttgcggcacgacctgatcccttcccgaactcagaagtcaaacgcagcaccgctaatgatactccagtgtttactggtgggaaagtaggcaatgcgcggt---
>CPR_PB1_Jacksonbacteria_GCA_000405165.1
--tctggtgattctaccggggaggtaacacccgttcccatcccgaacacggcagttaagctccctagggccgatggtagtcc--------tttgggcgagagtaggtaattgccagaa--
>CPR_PB1_Jacksonbacteria_GCA_001818275.1
--tccggtgcttctagcgaaggggaaacacttcttcccatcccgaacagagcagttaagcccttcagcgccgatgatacctttttt----taagggggaaagtaggccagtgccggaa--
>CPR_PB1_Jacksonbacteria_GCA_001818275.1_2
--tatggtggtttt-gccgggggtgttcacctcttcccattccgaacagagaagttaagtcccccatggccgatggtactcgcatc----tagctgggagagtaggtagctgccatat--
>CPR_PB1_Kerfeldbacteria_GCA_001818285.1
--cctggtgatctaagcgactgggtcacacctgttcccattccgaacacagaagttaagccagtctgcgccgatggtactttcgagcttatcgacggcagagtaggccatcgccaggg--
>CPR_PB1_Kerfeldbacteria_GCA_001818785.1
--tttggtggctcaagcgggggtgatacacccgatcccattccgaactcggaagttaagaccccaagcgttaatgatagctt---------tatagcgaaagtagaccgctgccaatt--
>CPR_PB1_Kerfeldbacteria_GCA_001818775.1
--tctggtgcttctagcgatggggaaacacctgatccctttccgaactcagcagttaagcccatcagcgctgatgatagtcct-------tcggggcgaaagtaagccagtgccagtt--
>CPR_PB1_Komeilibacteria_GCA_001818395.1
--tcccgtatttccagcgaaggggcaacacctgttcccatcccgaacacagccgttaagcccttcagcgccgatggtagtgcctgtaaaccgggtgcaagagtaggccaatgcgggaa--
>CPR_PB1_Komeilibacteria_GCA_000991205.1
--tctggtggttctatttaagaggtcacacctgatcccatttcgaactcagtagttaagctcttttaggccgatggtagtaagccct---ggtttgcgagagtaggtcatcgccagaa--
>CPR_PB1_Komeilibacteria_GCA_001818445.1
--tctcgtggcactagcgagttggcaacacctgatcccatttcgaactcagtagttaagcgactcagcgccgatggtaatagcttat---tggctgtgagagtaggtcgtcgcgagag--
>CPR_PB1_Komeilibacteria_GCA_001818835.1
--ctcggtgcttctgctgagttggccacactcgttcccattccgaacacgaccgttaagcaactcaaggccgatggtagtatggctt---gccatgcaagcgtaggtaagtgccgagg--
>CPR_PB1_Veblenbacteria_GCA_001822985.1
--tttggtgattcaagccaaggggtaacacctcttcccatcccgaacagagccgttaagcccttgagcgccgatgatactcaggcattagcctgtgggaaagtaggccatcgccaaaa--
>CPR_PB1_Falkowbacteria_GCA_001778005.1
--tccggtgtcttgagcgacagggacacacccgttcccatctcgaacacggaagttaagcctgtcagcgccgatggtacttgggcgta--gccctgggagagtaggccgatgccggga--
>CPR_PB1_Falkowbacteria_GCA_000997945.1
--tctggtgctacttgcggcggggccacacctgatcccatcccgaactcagaagttaagcccgccagcgccgatggtactcggaca-ttagtcccgggagagtaggtcagcgccggaa--
>CPR_PB1_Falkowbacteria_GCA_001778325.1
--tttggtggttctagcgggaggggtacacctgatcccatctcgaactcagaagttaagcctcctagcgccgatgatacttgggtttt--accctggaaaagtaggtcgccgccaaaa--
>CPR_PB1_Buchananbacteria_GCA_001817505.1
--cccggtgtttttgacgagatggccacacctgatcccatcccgaactcagcagttaagcatcttagtgccgatgatactctt-------caatggggaaagtaggtaaatgccgggt--
>CPR_PB1_Buchananbacteria_GCA_001817255.1
--cccggtgcttctagcgaagtggctacacccgttcccattccgaacacggaagttaagcacttcagcactaatgatattcct-------tcggggagaaagtaagacagtgccgggt--
>CPR_PB1_Buchananbacteria_GCA_001817425.1
--cctggtgattctagcgacagggtcacacccgatcccatcccgaactcggaagttaagcctgtcagcaccgatgatactt---------ttatagggaaagtaggtcatcgccagga--
>CPR_PB1_Uhrbacteria_GCA_001791465.1
--ctcggtgcctcgagcgatgtggaaccacctcttcccatcccgaacagagtcgtgaaacgcatcagcgccgatgatacttggacccaacgtcctgggaaagtaggccggtgccgagg--
>CPR_PB1_Uhrbacteria_GCA_001873525.1
--tccggtggttcttgcgatggggaaatacccgatcccattccgaactcggtcgtcaagcccatcagcgccgatgatactct--------ttatggggaaagtaggtcgccgccggtg--
>CPR_PB1_Uhrbacteria_GCA_016699205.1
--accggtggcccaagcgaagaggtcacacccgttcccatctcgaacacggaagttaagctcttcagcagcgatggtacttggacccaacgtcctggaagagtagcccgccgccggac--
>CPR_PB1_Uhrbacteria_GCA_001791325.1
--cctcgtgcttcaagcgaaagggccacacctgatcccattccgaactcagccgttaagcctttcagcgccgatgatactcca-------tcagggggaaagtaggccagcgcgagga--
>CPR_PB1_Uhrbacteria_GCA_001791115.1
--tctggtgtcttgagcgggcgggtcacacctcttcccattccgaacagagcagttaagccgcccagcgttgatggtacttggcgtaaaccgcccgggagagtagaccgacgccagaa--
>CPR_PB1_Uhrbacteria_GCA_001872545.1
--ctcggtggcacttcctcgtgggtcacacccgttcccatctcgaacacggaagttaagccacgttgggccgatgatacttggggtaaaccccctgggaaagtaggtggccgccggga--
>CPR_PB1_Uhrbacteria_GCA_001004485.1
--cttggtggcacttccagctgggtcacacccgttcccatcccgaacacggtcgttaagccagtctgggccgatggtagtcag-------gtttggcgagagtaggtcgccgccagga--
>CPR_PB1_Uhrbacteria_GCA_001791695.1
--ctcggtgctccttccaggagggtcacacctgttcccatcccgaccacagcagttaagcctccttgggccgatggtagtgcg-------attgcgcgagagtaggtaggcgccggga--
>CPR_PB1_Magasanikbacteria_GCA_000996735.1
--cccagtgcttcaggcggagtggccacacccgttcccattccgaacacggaagttaagcactcaggcgctgatgatagctggacccaacgtcccgcaaaagtaggcaagtgctgggg--
>CPR_PB1_Magasanikbacteria_GCA_001782975.1
--attggtgcttcaagtgcagtggaaacacccgttcccattccgaacacggcagttaagcactgttacggcgatgatagtcggttccaacgacccgcgaaagtagcccgccgccagtt--
>CPR_PB1_Magasanikbacteria_GCA_001783035.1
--ctaggtgccttaagcgagggggtaacacccgatcccatcccgaactcggcagttaagcctctcagcgcccatgatagcgtcaatc--------gcaaaagtaggccggcgcctgga--
>CPR_PB1_Magasanikbacteria_GCA_001783135.1
--cttggtggcacaagcgaagaggtcacacctgttcccatcccgaacacagcagttaagctcttctgcgctgatgatag-----------gtaatgcaaaagtaggccgccgccagga--
>CPR_PB1_Magasanikbacteria_GCA_001783065.1
--ctaggtgcttcaaacgactaggccctacctgatcccatctcgaactcagcagtaaaactagtcagtgtcgatgatagcggca---------acgcgaaagtagaccagcgcctgga--
>CPR_PB1_Magasanikbacteria_GCA_001784405.1
--ctgggtgctttttgagacgagggtccgcccgatcccatcccgaactcggaagctaagctcgttatcgccgatggtactc---------gcaaggggagagtaggccagcgctcaga--
>CPR_PB1_Magasanikbacteria_GCA_001783045.1
--ctaggtggtttttgcggtgggggtacacctgttcccatcccgaacacagcagttaagcccaccagcgccgatggtagtc---------gcaaggcaagagtaggtcgccgcctaga--
>CPR_otherPB_Moranbacteria_GCA_016699975.1
--gctggtgcctcgagcggagtgggtacacctcttcccatcccgaacagagccgttaagcactccagcgccgatggtaccccgcaccttttgcgggggagagtaggtcggtgccagct--
>CPR_otherPB_Moranbacteria_GCA_016699875.1
--tctggtgtctcttgccgcgaggatacacctcttcccatttcgaacagagccgttaagctcgcgcacgccgatggtaccccgctt----tgcgggggagagtaggtcgatgccaggt--
>CPR_otherPB_Moranbacteria_GCA_016699795.1
--ctcggtgccttgagcggagcgggtacacctgttcccatcccgaacacagcagttaagtgctccagcgccgatggtaccccc-------ttggggggagagtaggtcggtgccgaga--
>CPR_otherPB_Moranbacteria_GCA_016699385.1
--tctggtgtctcttgccgcgagggtacacctcttcccattccgaacagagccgttaagctcgcgcacgccgatggtacctcgcactttttgcgggggagagtaggtcgatgccaggt--
>CPR_otherPB_Moranbacteria_GCA_001784645.1
--tccggtgcctctagcgatagggccacacctgattccataccgaactcagtagttaagcctgtcagcgctgatgatatctgggct-ttagcctagggaaagtaagccggtgccggga--
>CPR_otherPB_Moranbacteria_GCA_000995125.1
--tccggtatctctagcgaagtggatacacccgatcccattccgaactcggcagttaagcacttcagccccgatgatatctaggcag---gtctaggaaaagtaggacggtgccggga--
>CPR_otherPB_Moranbacteria_GCA_001784805.1
--tttggtggcttttgcgaagtggttacacctctttccattccgaacagagcagttaagcacttcagcgctgatggtaccccgattt---atcggggaagagtaagccgccgccagaa--
>CPR_otherPB_Moranbacteria_GCA_001784815.1
--ctcggcgcttctagcgatagggtcacacccgatcccattccgaactcggccgttaagcctgtcagcgctgatggtagctcg-------caagggcgagagtaagccagtgccggga--
>CPR_otherPB_Moranbacteria_GCA_001786615.1
--cttggtgcttttagcggagtggagatacccgatcccatcccgaactcggtagtcaagcactccagcgccgatggtagctct-------tcggagcaagagtaggtcggcgccaaga--
>CPR_otherPB_Moranbacteria_GCA_000992325.1
--tctggtgactcttgcgactgggtaacacctcttcccatcccgaacagagcagttaagacagtccgcgccgatggtacctc--------catgagggagagtaggtcgtcgccagaa--
>CPR_otherPB_Moranbacteria_GCA_000989885.1
--cttggtggtttttgcgaaggaggtacacctgatcccatctcgaactcagaagttaagccctttagctccaatgataccccgttta---ttcggaggaaagtaggtcgccgccaaga--
>CPR_otherPB_Moranbacteria_GCA_001873245.1
--tccggtgctttaagcgttgtggaaacacctgatcccataccgaactcagcagttaagcacttcagcaccgatggtagcctt-------cagtggcaagagtaggacagtgccgggt--
>CPR_otherPB_Portnoybacteria_GCA_001819435.1
--taagggggccataccggggatgctccacctgatcccattccgaactcagaagtgaaatcccctagggtcaatggtagtgca-------ttagcgcaagagtagatcgctcccttat--
>CPR_otherPB_Portnoybacteria_GCA_000992445.2
--gtcggtgcttcaagcggcgtggcaccacctcttcccattccgaacagagaagtgaaaaacgccagcgccgatgatattttcgttc---gcgaagaaaaagtaggccagtgccgaca--
>CPR_otherPB_Portnoybacteria_GCA_001819605.1
--tatggggattataccgagaatgctccacctgttcccattccgaacacagaagtgaaatttctcaaggccgatgatagtgggtt-----ttcccgcgaaagtaggtcgtccccgttt--
>CPR_otherPB_Portnoybacteria_GCA_000997475.1
--cttggtgattcgagcggccgggtaaaacctcttcccatttcgaacagagaagttaaaacggccagcgcccatggtagtcggggcttaactccggcgagagtaggccgtcgccaaga--
>CPR_otherPB_Portnoybacteria_GCA_001819635.1
--cctggtgatttaggcaggctggcaacacctcttcccatttcgaacagagaagttaaacagtctagcgttgatggtagttagagcttaactttagcgagagtagaccattgccagga--
>CPR_otherPB_Azambacteria_GCA_001002715.1
--cctcccgaccatagcgggcgtgaaccacctcttcccattccgaacagagaagtgaaagcgcccggcgccgatgatactgcttgagcatcgagcgggaaagtaggtatcgggggga---
>CPR_otherPB_Azambacteria_GCA_000992485.1
--tctggtgacaatagcaacctggcaccacctcttcccataccgaacagagaagtgaaactggttggcgccgatgatactacattcattgattgtgggaaagtaggtattgccggaa---
>CPR_otherPB_Azambacteria_GCA_001773975.1
--ccccgtgactatagggcatgggtactacctcttcccattccgaacagagtcgtaaaactatgcaccgccgatgatattgcttcgttatgttgtgagaaagtaggtcattgcgggga--
>CPR_otherPB_Azambacteria_GCA_000993265.1
--cctggtgacaacagcgcggcggcaccacctcttcccattccgaacagagaagttaaacgccgtgtcgacgatgatactcgaccctcgaggtcggggaaagtag-ttatcgccggga--
>CPR_otherPB_Yanofskybacteria_GCA_001824325.1
--gttggtgattctagcggagagggtccacccgatcccattccgaactcggaagttaagctctccagccccgatgatacttcactcgcaaggtgcgggacagtaggacgtcgccaaca--
>CPR_otherPB_Yanofskybacteria_GCA_000397985.1
--ctcggtgccatgagcggtgtggaaccaccttttcccattccgaacaaagaagtgaaacgcgccagcgccgatggtacttcgtccatgtggcgggggagagtaggtcggtgccgagt--
>CPR_otherPB_Yanofskybacteria_GCA_001824315.1
--taaggcagttatatcggagatgctccacctgtttccattccgaacacagaagtgaaattctccagagccgatgatagtttctcgctaagggatgcgaaagtaggtcgctgtcttac--
>CPR_otherPB_Yanofskybacteria_GCA_001794605.1
--tctggtgataataccggcgttgtcccacctgatcccattccgaactcagtagtgaaaggcgccaaggccgatgatagcggt-------catccgcaaaagtaggtagtcgccagaa--
>CPR_otherPB_Yanofskybacteria_GCA_001794715.1
--tagggtagctatactgagagtgctccacctgatcccattccgaactcagaagtgaaatctctcgaggcccatgatacccagcaccatttgctggggaaagtaggtagctgccttac--
>CPR_otherPB_Yanofskybacteria_GCA_000997705.1
--ctcggtgactatactggcgttgtactacctgatcccattccgaactcagaagtaaaagacgccaaggcccatgatagttggatt----atccagcgaaagtaggtagtcgccggat--
>CPR_otherPB_Yanofskybacteria_GCA_001794675.1
--taaggtagctatgccaagggtgctccacctgttcccattccgaacacagaagtgaaatcccttaaggcccatgatagtcggttt----caccggcgaaagtaggtagctgccctac--
>CPR_otherPB_Yanofskybacteria_GCA_001794525.1
--cttggtggctatgctgaaggtgtcccacccgatcccatcccgaactcggaagtgaaatccttcaaggcccatgatagtcggact----atccggcgaaagtaggtagccgccagac--
[truncated: 630 more rows]
